# Supplementary material
Source: Frontiers journal article supplement (https://www.frontiersin.org/articles/432974)
Supplement: Data_Sheet_1.ZIP [file Supplementary Table 1.xlsx]

## Sheet: 1. All OGs
	Genotype	cremoris	cremoris	cremoris	cremoris	cremoris	cremoris	cremoris	cremoris	cremoris	cremoris	cremoris	cremoris	cremoris	cremoris	cremoris	hordniae	lactis	lactis	lactis	lactis	lactis	lactis	lactis	lactis	lactis	lactis	lactis	lactis	lactis	lactis	lactis	lactis	lactis	lactis	lactis	lactis	lactis	lactis	lactis	lactis	lactis	lactis	lactis		Count non_blank	Conserved in all strains
	Phenotype	cremoris	cremoris	cremoris	cremoris	cremoris	cremoris	cremoris	cremoris	cremoris	lactis	lactis	lactis	lactis	lactis	lactis		lactis	lactis	lactis	lactis	lactis	lactis	lactis	lactis	lactis	lactis	lactis	lactis	lactis	lactis	lactis	lactis	lactis	lactis	lactis	lactis	lactis	lactis	lactis	lactis	lactis	lactis	lactis
	Strain	A76	UC509_9	FG2	HP	LMG6897	B40	SK11	AM2	SK110	KW10	KW2	MG1363	NCDO763	N41	V4	LMG8520	IO_1	LMG8526	KF147	KF282	E34	KF201	M20	ATCC19435	KF7	LMG9449	K231	K337	KF24	Li1	N42	ML8	UC317	KF67	LMG9446	KF146	KF134	KF196	DRA4	IL1403	CV56	KLDS	LMG14418	P7266
OG_1	Mobile element protein	A76|A76_0052 A76|A76_0068 A76|A76_0106 A76|A76_0442 A76|A76_0498 A76|A76_0543 A76|A76_0710 A76|A76_0712 A76|A76_0863 A76|A76_0893 A76|A76_1084 A76|A76_1132 A76|A76_1166 A76|A76_1194 A76|A76_1234 A76|A76_1358 A76|A76_1366 A76|A76_1401 A76|A76_1442 A76|A76_1609 A76|A76_1619 A76|A76_1653 A76|A76_1669 A76|A76_1689 A76|A76_1695 A76|A76_1818 A76|A76_1916 A76|A76_1937 A76|A76_1999 A76|A76_2231 A76|A76_2…	UC509_9|UC5099_0040 UC509_9|UC5099_0055 UC509_9|UC5099_0078 UC509_9|UC5099_0145 UC509_9|UC5099_0338 UC509_9|UC5099_0357 UC509_9|UC5099_0365 UC509_9|UC5099_0406 UC509_9|UC5099_0412 UC509_9|UC5099_0451 UC509_9|UC5099_0468 UC509_9|UC5099_0644 UC509_9|UC5099_0704 UC509_9|UC5099_0801 UC509_9|UC5099_0909 UC509_9|UC5099_0925 UC509_9|UC5099_0931 UC509_9|UC5099_0953 UC509_9|UC5099_0968 UC509_9|UC5099_1006…	FG2|FG2_1573	HP|HP_2010	LMG6897|LMG6897_1481	B40|B40_1156 B40|B40_2428	SK11|SK11_0048 SK11|SK11_0062 SK11|SK11_0283 SK11|SK11_0343 SK11|SK11_0371 SK11|SK11_0419 SK11|SK11_0475 SK11|SK11_0657 SK11|SK11_0659 SK11|SK11_0692 SK11|SK11_0711 SK11|SK11_0717 SK11|SK11_0789 SK11|SK11_0912 SK11|SK11_0917 SK11|SK11_0936 SK11|SK11_0951 SK11|SK11_0989 SK11|SK11_0995 SK11|SK11_1162 SK11|SK11_1229 SK11|SK11_1325 SK11|SK11_1351 SK11|SK11_1358 SK11|SK11_1393 SK11|SK11_1429 SK11|SK11…					MG1363|MG1363_0679		N41|N41_1500	V4|V4_0880														KF24|KF24_2574			ML8|ML8_0846 ML8|ML8_1859								IL1403|IL1403_0698	CV56|CV56_1116				14	FALSE
OG_10	Kup system potassium uptake protein	A76|A76_1981 A76|A76_1982	UC509_9|UC5099_0653 UC509_9|UC5099_0654	FG2|FG2_1025 FG2|FG2_1026	HP|HP_0999 HP|HP_1000	LMG6897|LMG6897_2098 LMG6897|LMG6897_2099	B40|B40_1356 B40|B40_1357	SK11|SK11_0629 SK11|SK11_0630	AM2|AM2_1704 AM2|AM2_1705	SK110|SK110_2134 SK110|SK110_2135	KW10|KW10_0808 KW10|KW10_0809	KW2|KW2_0554 KW2|KW2_0555	MG1363|MG1363_0607 MG1363|MG1363_0606	NCDO763|NCDO763_1574 NCDO763|NCDO763_1573	N41|N41_1673 N41|N41_1674	V4|V4_1699 V4|V4_1700	LMG8520|LMG8520_0764 LMG8520|LMG8520_0765	IO_1|IO1_0535 IO_1|IO1_0536	LMG8526|LMG8526_0791 LMG8526|LMG8526_0792	KF147|KF147_0637 KF147|KF147_0638 KF147|KF147_2615	KF282|KF282_1496 KF282|KF282_1497 KF282|KF282_2374	E34|E34_0879 E34|E34_0880	KF201|KF201_1839 KF201|KF201_1840	M20|M20_0789 M20|M20_0790	ATCC19435|ATCC19435_0662 ATCC19435|ATCC19435_0663	KF7|KF7_1869 KF7|KF7_1870	LMG9449|LMG9449_2406 LMG9449|LMG9449_2407	K231|K231_1819 K231|K231_1820	K337|K337_1160 K337|K337_1161	KF24|KF24_1944 KF24|KF24_1945 KF24|KF24_2575	Li1|Li1_0070 Li1|Li1_0071	N42|N42_0078 N42|N42_0079	ML8|ML8_2122 ML8|ML8_2123	UC317|UC317_0449 UC317|UC317_0450	KF67|KF67_2431 KF67|KF67_2432	LMG9446|LMG9446_1876 LMG9446|LMG9446_1877	KF146|KF146_1203 KF146|KF146_1204	KF134|KF134_2148 KF134|KF134_2149	KF196|KF196_1992 KF196|KF196_1993	DRA4|DRA4_2114 DRA4|DRA4_2115	IL1403|IL1403_0669 IL1403|IL1403_0670	CV56|CV56_0584 CV56|CV56_0585	KLDS|KLDS_0670 KLDS|KLDS_0671	LMG14418|LMG14418_0162 LMG14418|LMG14418_0163	P7266|P7266_0059	44	1
OG_100	hypothetical protein	A76|A76_0029		FG2|FG2_0155 FG2|FG2_0154	HP|HP_0193 HP|HP_0194	LMG6897|LMG6897_2128 LMG6897|LMG6897_2127	B40|B40_0548 B40|B40_0547	SK11|SK11_0027	AM2|AM2_0247	SK110|SK110_1348		KW2|KW2_0028	MG1363|MG1363_0057	NCDO763|NCDO763_0683	N41|N41_0353	V4|V4_0795	LMG8520|LMG8520_0023	IO_1|IO1_2027	LMG8526|LMG8526_0249	KF147|KF147_2195	KF282|KF282_0189	E34|E34_2117	KF201|KF201_1044	M20|M20_2305 M20|M20_2372	ATCC19435|ATCC19435_1614	KF7|KF7_1248	LMG9449|LMG9449_0036	K231|K231_0210	K337|K337_1211	KF24|KF24_0162	Li1|Li1_0181	N42|N42_2293	ML8|ML8_0936	UC317|UC317_2371	KF67|KF67_1495	LMG9446|LMG9446_1290	KF146|KF146_1081	KF134|KF134_1915	KF196|KF196_1226	DRA4|DRA4_1382	IL1403|IL1403_2120	CV56|CV56_2048	KLDS|KLDS_2217	LMG14418|LMG14418_1814		41	FALSE
OG_1000	COG1272: Predicted membrane protein hemolysinIII homolog	A76|A76_2091	UC509_9|UC5099_0534	FG2|FG2_2347	HP|HP_2487	LMG6897|LMG6897_1376	B40|B40_0010	SK11|SK11_0522	AM2|AM2_1570	SK110|SK110_2342	KW10|KW10_1345	KW2|KW2_0462	MG1363|MG1363_0509	NCDO763|NCDO763_0121	N41|N41_0140	V4|V4_2137	LMG8520|LMG8520_1737	IO_1|IO1_0437	LMG8526|LMG8526_2272	KF147|KF147_0519	KF282|KF282_0679	E34|E34_1178	KF201|KF201_0384	M20|M20_1988	ATCC19435|ATCC19435_2462	KF7|KF7_0327	LMG9449|LMG9449_0940	K231|K231_1394	K337|K337_0592	KF24|KF24_0631	Li1|Li1_2186	N42|N42_0406	ML8|ML8_1221	UC317|UC317_1813	KF67|KF67_1682	LMG9446|LMG9446_0619	KF146|KF146_2329	KF134|KF134_0882	KF196|KF196_0365	DRA4|DRA4_1678	IL1403|IL1403_0544	CV56|CV56_0483	KLDS|KLDS_0540	LMG14418|LMG14418_0459	P7266|P7266_0299	44	1
OG_1001	Hypothetical protein DUF194, DegV family	A76|A76_2090	UC509_9|UC5099_0535	FG2|FG2_2346	HP|HP_2486	LMG6897|LMG6897_1375	B40|B40_0009	SK11|SK11_0523	AM2|AM2_1569	SK110|SK110_2341	KW10|KW10_1344	KW2|KW2_0463	MG1363|MG1363_0510	NCDO763|NCDO763_0122	N41|N41_0139	V4|V4_2138	LMG8520|LMG8520_1738	IO_1|IO1_0438	LMG8526|LMG8526_2273	KF147|KF147_0520	KF282|KF282_0680	E34|E34_1177	KF201|KF201_0385	M20|M20_1989	ATCC19435|ATCC19435_2461	KF7|KF7_0328	LMG9449|LMG9449_0939	K231|K231_1393	K337|K337_0593	KF24|KF24_0630	Li1|Li1_2187	N42|N42_0405	ML8|ML8_1220	UC317|UC317_1814	KF67|KF67_1683	LMG9446|LMG9446_0618	KF146|KF146_2330	KF134|KF134_0881	KF196|KF196_0366	DRA4|DRA4_1677	IL1403|IL1403_0545	CV56|CV56_0484	KLDS|KLDS_0541	LMG14418|LMG14418_0458	P7266|P7266_0298	44	1
OG_1002	FIG006988: Lipase/Acylhydrolase with GDSL-likemotif	A76|A76_2089	UC509_9|UC5099_0536	FG2|FG2_2345	HP|HP_2485	LMG6897|LMG6897_1374	B40|B40_0008	SK11|SK11_0524	AM2|AM2_1568	SK110|SK110_2340	KW10|KW10_1343	KW2|KW2_0464	MG1363|MG1363_0511	NCDO763|NCDO763_0123	N41|N41_0138	V4|V4_2139	LMG8520|LMG8520_1739	IO_1|IO1_0439	LMG8526|LMG8526_2274	KF147|KF147_0521	KF282|KF282_0681	E34|E34_1176	KF201|KF201_0386	M20|M20_1990	ATCC19435|ATCC19435_2460	KF7|KF7_0329	LMG9449|LMG9449_0938	K231|K231_1392	K337|K337_0594	KF24|KF24_0629	Li1|Li1_2188	N42|N42_0404	ML8|ML8_1219	UC317|UC317_1815	KF67|KF67_1684	LMG9446|LMG9446_0617	KF146|KF146_2331	KF134|KF134_0880	KF196|KF196_0367	DRA4|DRA4_1676	IL1403|IL1403_0546	CV56|CV56_0485	KLDS|KLDS_0542	LMG14418|LMG14418_0457	P7266|P7266_0297	44	1
OG_1003	Beta-hexosaminidase (EC 3.2.1.52)	A76|A76_2088	UC509_9|UC5099_0537	FG2|FG2_1941	HP|HP_2484	LMG6897|LMG6897_1373	B40|B40_0007	SK11|SK11_0525	AM2|AM2_1567	SK110|SK110_2339	KW10|KW10_1342	KW2|KW2_0465	MG1363|MG1363_0512	NCDO763|NCDO763_0124	N41|N41_0137	V4|V4_2140	LMG8520|LMG8520_1740	IO_1|IO1_0440	LMG8526|LMG8526_2275	KF147|KF147_0522	KF282|KF282_0682	E34|E34_1175	KF201|KF201_0387	M20|M20_1991	ATCC19435|ATCC19435_2459	KF7|KF7_0330	LMG9449|LMG9449_0937	K231|K231_1391	K337|K337_0595	KF24|KF24_0628	Li1|Li1_2189	N42|N42_0403	ML8|ML8_1218	UC317|UC317_1816	KF67|KF67_1685	LMG9446|LMG9446_0616	KF146|KF146_2332	KF134|KF134_0879	KF196|KF196_0368	DRA4|DRA4_1675	IL1403|IL1403_0547	CV56|CV56_0486	KLDS|KLDS_0543	LMG14418|LMG14418_0456	P7266|P7266_0296	44	1
OG_1004	YfaA	A76|A76_2087	UC509_9|UC5099_0538	FG2|FG2_1942	HP|HP_2483	LMG6897|LMG6897_1372	B40|B40_0006	SK11|SK11_0526	AM2|AM2_1566	SK110|SK110_2338	KW10|KW10_1341	KW2|KW2_0466	MG1363|MG1363_0513	NCDO763|NCDO763_0125	N41|N41_0136	V4|V4_2141	LMG8520|LMG8520_1741	IO_1|IO1_0441	LMG8526|LMG8526_2276	KF147|KF147_0523	KF282|KF282_0683	E34|E34_1174	KF201|KF201_0388	M20|M20_1992	ATCC19435|ATCC19435_2458	KF7|KF7_0331	LMG9449|LMG9449_0936	K231|K231_1390	K337|K337_0596	KF24|KF24_0627	Li1|Li1_2190	N42|N42_0402	ML8|ML8_1217	UC317|UC317_1817	KF67|KF67_1686	LMG9446|LMG9446_0615	KF146|KF146_2333	KF134|KF134_0878	KF196|KF196_0369	DRA4|DRA4_1674	IL1403|IL1403_0548	CV56|CV56_0487	KLDS|KLDS_0544	LMG14418|LMG14418_0455	P7266|P7266_0295	44	1
OG_1005	DNA-binding protein HBsu	A76|A76_2086	UC509_9|UC5099_0539	FG2|FG2_1943	HP|HP_2482	LMG6897|LMG6897_1371	B40|B40_0005	SK11|SK11_0527	AM2|AM2_1565	SK110|SK110_2337	KW10|KW10_1340	KW2|KW2_0467	MG1363|MG1363_0514	NCDO763|NCDO763_0126	N41|N41_0135	V4|V4_2142	LMG8520|LMG8520_1742	IO_1|IO1_0442	LMG8526|LMG8526_2277	KF147|KF147_0524	KF282|KF282_0684	E34|E34_1173	KF201|KF201_0389	M20|M20_1993	ATCC19435|ATCC19435_2457	KF7|KF7_0332	LMG9449|LMG9449_0935	K231|K231_1389	K337|K337_0597	KF24|KF24_0626	Li1|Li1_2191	N42|N42_0401	ML8|ML8_1216	UC317|UC317_1818	KF67|KF67_1687	LMG9446|LMG9446_0614	KF146|KF146_2334	KF134|KF134_0877	KF196|KF196_0370	DRA4|DRA4_1673	IL1403|IL1403_0549	CV56|CV56_0488	KLDS|KLDS_0545	LMG14418|LMG14418_0454	P7266|P7266_0294	44	1
OG_1006	Cysteine desulfurase (EC 2.8.1.7)	A76|A76_2075	UC509_9|UC5099_0552	FG2|FG2_1953	HP|HP_2472	LMG6897|LMG6897_1361	B40|B40_0332	SK11|SK11_0538	AM2|AM2_0431	SK110|SK110_2326	KW10|KW10_1327	KW2|KW2_0476	MG1363|MG1363_0523	NCDO763|NCDO763_0135	N41|N41_1152	V4|V4_2151	LMG8520|LMG8520_1751	IO_1|IO1_0450	LMG8526|LMG8526_2285	KF147|KF147_0533	KF282|KF282_0693	E34|E34_1165	KF201|KF201_0397	M20|M20_2002	ATCC19435|ATCC19435_1166	KF7|KF7_2071	LMG9449|LMG9449_0927	K231|K231_1381	K337|K337_0604	KF24|KF24_0618	Li1|Li1_2199	N42|N42_2483	ML8|ML8_1873	UC317|UC317_2495	KF67|KF67_1695	LMG9446|LMG9446_0606	KF146|KF146_2343	KF134|KF134_0869	KF196|KF196_0379	DRA4|DRA4_1662	IL1403|IL1403_0579	CV56|CV56_0496	KLDS|KLDS_0578	LMG14418|LMG14418_0430	P7266|P7266_0293	44	1
OG_1007	Probable cell wall-binding protein	A76|A76_2074	UC509_9|UC5099_0553	FG2|FG2_1954	HP|HP_2471	LMG6897|LMG6897_1360	B40|B40_0331	SK11|SK11_0539	AM2|AM2_0432	SK110|SK110_2325	KW10|KW10_1326	KW2|KW2_0477	MG1363|MG1363_0524	NCDO763|NCDO763_0136	N41|N41_1151	V4|V4_2152	LMG8520|LMG8520_1753	IO_1|IO1_0451	LMG8526|LMG8526_2287	KF147|KF147_0534	KF282|KF282_0694	E34|E34_1164	KF201|KF201_0398	M20|M20_2003	ATCC19435|ATCC19435_1167	KF7|KF7_2072	LMG9449|LMG9449_0926	K231|K231_1380	K337|K337_0605	KF24|KF24_0617	Li1|Li1_2200	N42|N42_2484	ML8|ML8_1874	UC317|UC317_2496	KF67|KF67_1696	LMG9446|LMG9446_0605	KF146|KF146_2344	KF134|KF134_0868	KF196|KF196_0380	DRA4|DRA4_1661	IL1403|IL1403_0580	CV56|CV56_0497	KLDS|KLDS_0579	LMG14418|LMG14418_0431	P7266|P7266_0292	44	1
OG_1008	Cysteine synthase (EC 2.5.1.47)	A76|A76_2072	UC509_9|UC5099_0555	FG2|FG2_1956	HP|HP_2469	LMG6897|LMG6897_1358	B40|B40_0329	SK11|SK11_0541	AM2|AM2_0434	SK110|SK110_2323	KW10|KW10_1324	KW2|KW2_0479	MG1363|MG1363_0526	NCDO763|NCDO763_0138	N41|N41_1149	V4|V4_2154	LMG8520|LMG8520_1755	IO_1|IO1_0453	LMG8526|LMG8526_2289	KF147|KF147_0536	KF282|KF282_0696	E34|E34_1162	KF201|KF201_0400	M20|M20_2005	ATCC19435|ATCC19435_1169	KF7|KF7_2074	LMG9449|LMG9449_0924	K231|K231_1378	K337|K337_0607	KF24|KF24_0615	Li1|Li1_2202	N42|N42_2486	ML8|ML8_1876	UC317|UC317_2498	KF67|KF67_1698	LMG9446|LMG9446_0603	KF146|KF146_2346	KF134|KF134_0866	KF196|KF196_0382	DRA4|DRA4_1659	IL1403|IL1403_0582	CV56|CV56_0499	KLDS|KLDS_0581	LMG14418|LMG14418_0433	P7266|P7266_0291	44	1
OG_1009	N-acetylmuramoyl-L-alanine amidase AmiBprecursor (EC 3.5.1.28)	A76|A76_2071	UC509_9|UC5099_0556	FG2|FG2_1563	HP|HP_1565	LMG6897|LMG6897_1161	B40|B40_0328	SK11|SK11_0542	AM2|AM2_0435	SK110|SK110_2322	KW10|KW10_1323	KW2|KW2_0480	MG1363|MG1363_0527	NCDO763|NCDO763_0139	N41|N41_1148	V4|V4_2155	LMG8520|LMG8520_1756	IO_1|IO1_0454	LMG8526|LMG8526_2290	KF147|KF147_0537	KF282|KF282_0697	E34|E34_1161	KF201|KF201_0401	M20|M20_2006	ATCC19435|ATCC19435_1170	KF7|KF7_2075	LMG9449|LMG9449_0923	K231|K231_1377	K337|K337_0608	KF24|KF24_0614	Li1|Li1_2203	N42|N42_2487	ML8|ML8_1877	UC317|UC317_2499	KF67|KF67_1699	LMG9446|LMG9446_0602	KF146|KF146_2347	KF134|KF134_0865	KF196|KF196_0383	DRA4|DRA4_1658	IL1403|IL1403_0583	CV56|CV56_0500	KLDS|KLDS_0582	LMG14418|LMG14418_0434	P7266|P7266_0290	44	1
OG_101	FIG00755139: hypothetical protein	A76|A76_2291		FG2|FG2_1911	HP|HP_0101	LMG6897|LMG6897_0101		SK11|SK11_2287	AM2|AM2_0646	SK110|SK110_0171			MG1363|MG1363_2612 MG1363|MG1363_0032 MG1363|MG1363_2332	NCDO763|NCDO763_1203 NCDO763|NCDO763_0650 NCDO763|NCDO763_0482	N41|N41_0330 N41|N41_0125	V4|V4_1187	LMG8520|LMG8520_2275			KF147|KF147_2519	KF282|KF282_1746 KF282|KF282_1230				ATCC19435|ATCC19435_0611 ATCC19435|ATCC19435_1184 ATCC19435|ATCC19435_2047		LMG9449|LMG9449_0571	K231|K231_0267		KF24|KF24_1886 KF24|KF24_0216		N42|N42_1219 N42|N42_0482		UC317|UC317_1599	KF67|KF67_1422	LMG9446|LMG9446_1143	KF146|KF146_2432	KF134|KF134_2295	KF196|KF196_1078	DRA4|DRA4_0177	IL1403|IL1403_0039	CV56|CV56_0068 CV56|CV56_2358	KLDS|KLDS_2614 KLDS|KLDS_2270 KLDS|KLDS_2544	LMG14418|LMG14418_0541 LMG14418|LMG14418_0269		30	FALSE
OG_1010	Hydroxyacylglutathione hydrolase (EC 3.1.2.6)	A76|A76_2070	UC509_9|UC5099_0557	FG2|FG2_1562	HP|HP_1564	LMG6897|LMG6897_1160	B40|B40_0327	SK11|SK11_0543	AM2|AM2_0436	SK110|SK110_2321	KW10|KW10_1322	KW2|KW2_0481	MG1363|MG1363_0528	NCDO763|NCDO763_0140	N41|N41_1147	V4|V4_2156	LMG8520|LMG8520_1757	IO_1|IO1_0455	LMG8526|LMG8526_2291	KF147|KF147_0538	KF282|KF282_0698	E34|E34_1160	KF201|KF201_0402	M20|M20_2007	ATCC19435|ATCC19435_1171	KF7|KF7_2076	LMG9449|LMG9449_0922	K231|K231_1376	K337|K337_0609	KF24|KF24_0613	Li1|Li1_2204	N42|N42_2488	ML8|ML8_1878	UC317|UC317_2500	KF67|KF67_1700	LMG9446|LMG9446_0601	KF146|KF146_2348	KF134|KF134_0864	KF196|KF196_0384	DRA4|DRA4_1657	IL1403|IL1403_0584	CV56|CV56_0501	KLDS|KLDS_0583	LMG14418|LMG14418_0435	P7266|P7266_0289	44	1
OG_1011	Multimodular transpeptidase-transglycosylase(EC 2.4.1.129) (EC 3.4.-.-) / Penicillin-binding protein1A/1B (PBP1)	A76|A76_2069	UC509_9|UC5099_0558	FG2|FG2_1561	HP|HP_1563	LMG6897|LMG6897_1159	B40|B40_0326	SK11|SK11_0546	AM2|AM2_0437	SK110|SK110_2320	KW10|KW10_1321	KW2|KW2_0482	MG1363|MG1363_0529	NCDO763|NCDO763_0141	N41|N41_1146	V4|V4_2157	LMG8520|LMG8520_1758	IO_1|IO1_0456	LMG8526|LMG8526_2292	KF147|KF147_0539	KF282|KF282_0699	E34|E34_1159	KF201|KF201_0403	M20|M20_2008	ATCC19435|ATCC19435_1172	KF7|KF7_2077	LMG9449|LMG9449_0921	K231|K231_1375	K337|K337_0610	KF24|KF24_0612	Li1|Li1_2205	N42|N42_2489	ML8|ML8_1879	UC317|UC317_2501	KF67|KF67_1701	LMG9446|LMG9446_0600	KF146|KF146_2349	KF134|KF134_0863	KF196|KF196_0385	DRA4|DRA4_0974	IL1403|IL1403_0585	CV56|CV56_0502	KLDS|KLDS_0584	LMG14418|LMG14418_0436	P7266|P7266_0288	44	1
OG_1012	RecU Holliday junction resolvase	A76|A76_2068	UC509_9|UC5099_0559	FG2|FG2_1560	HP|HP_1562	LMG6897|LMG6897_1158	B40|B40_0325	SK11|SK11_0547	AM2|AM2_0438	SK110|SK110_2319	KW10|KW10_1320	KW2|KW2_0483	MG1363|MG1363_0530	NCDO763|NCDO763_0142	N41|N41_1145	V4|V4_2158	LMG8520|LMG8520_1759	IO_1|IO1_0457	LMG8526|LMG8526_2293	KF147|KF147_0540	KF282|KF282_0700	E34|E34_1158	KF201|KF201_0404	M20|M20_2009	ATCC19435|ATCC19435_1173	KF7|KF7_2078	LMG9449|LMG9449_0920	K231|K231_1374	K337|K337_0611	KF24|KF24_0611	Li1|Li1_2206	N42|N42_2490	ML8|ML8_1880	UC317|UC317_2502	KF67|KF67_1702	LMG9446|LMG9446_0599	KF146|KF146_2350	KF134|KF134_0862	KF196|KF196_0386	DRA4|DRA4_0973	IL1403|IL1403_0586	CV56|CV56_0503	KLDS|KLDS_0585	LMG14418|LMG14418_0437	P7266|P7266_0287	44	1
OG_1013	Transcriptional regulator SpxA1	A76|A76_2066	UC509_9|UC5099_0561	FG2|FG2_1558	HP|HP_1560	LMG6897|LMG6897_1156	B40|B40_0323	SK11|SK11_0549	AM2|AM2_0440	SK110|SK110_2317	KW10|KW10_1318	KW2|KW2_0485	MG1363|MG1363_0532	NCDO763|NCDO763_0144	N41|N41_1143	V4|V4_2160	LMG8520|LMG8520_1761	IO_1|IO1_0459	LMG8526|LMG8526_2295	KF147|KF147_0542	KF282|KF282_0702	E34|E34_1156	KF201|KF201_0406	M20|M20_2011	ATCC19435|ATCC19435_1175	KF7|KF7_2080	LMG9449|LMG9449_0918	K231|K231_1372	K337|K337_0613	KF24|KF24_0609	Li1|Li1_2208	N42|N42_2492	ML8|ML8_1882	UC317|UC317_2504	KF67|KF67_1704	LMG9446|LMG9446_0597	KF146|KF146_2352	KF134|KF134_0860	KF196|KF196_0388	DRA4|DRA4_0971	IL1403|IL1403_0588	CV56|CV56_0505	KLDS|KLDS_0587	LMG14418|LMG14418_0439	P7266|P7266_0285	44	1
OG_1014	FIG006438: hypothetical protein	A76|A76_2065	UC509_9|UC5099_0562	FG2|FG2_1557	HP|HP_1559	LMG6897|LMG6897_1155	B40|B40_0322	SK11|SK11_0550	AM2|AM2_0441	SK110|SK110_2316	KW10|KW10_1317	KW2|KW2_0486	MG1363|MG1363_0533	NCDO763|NCDO763_0145	N41|N41_1142	V4|V4_2161	LMG8520|LMG8520_1762	IO_1|IO1_0460	LMG8526|LMG8526_2296	KF147|KF147_0543	KF282|KF282_0703	E34|E34_1155	KF201|KF201_0407	M20|M20_2012	ATCC19435|ATCC19435_1176	KF7|KF7_2081	LMG9449|LMG9449_0917	K231|K231_1371	K337|K337_0614	KF24|KF24_0608	Li1|Li1_2209	N42|N42_2493	ML8|ML8_1883	UC317|UC317_2505	KF67|KF67_1705	LMG9446|LMG9446_0596	KF146|KF146_2353	KF134|KF134_0859	KF196|KF196_0389	DRA4|DRA4_0970	IL1403|IL1403_0589	CV56|CV56_0506	KLDS|KLDS_0588	LMG14418|LMG14418_0440	P7266|P7266_0284	44	1
OG_1015	Inositol-1-monophosphatase (EC 3.1.3.25)	A76|A76_2064	UC509_9|UC5099_0563	FG2|FG2_1556	HP|HP_1558	LMG6897|LMG6897_1154	B40|B40_0321	SK11|SK11_0551	AM2|AM2_0442	SK110|SK110_2315	KW10|KW10_1316	KW2|KW2_0487	MG1363|MG1363_0534	NCDO763|NCDO763_0146	N41|N41_1141	V4|V4_2162	LMG8520|LMG8520_1763	IO_1|IO1_0461	LMG8526|LMG8526_2297	KF147|KF147_0544	KF282|KF282_0704	E34|E34_1154	KF201|KF201_0408	M20|M20_2013	ATCC19435|ATCC19435_1177	KF7|KF7_2082	LMG9449|LMG9449_0916	K231|K231_1370	K337|K337_0615	KF24|KF24_0607	Li1|Li1_2210	N42|N42_2494	ML8|ML8_1884	UC317|UC317_2506	KF67|KF67_1706	LMG9446|LMG9446_0595	KF146|KF146_2354	KF134|KF134_0858	KF196|KF196_0390	DRA4|DRA4_0969	IL1403|IL1403_0590	CV56|CV56_0507	KLDS|KLDS_0589	LMG14418|LMG14418_0441	P7266|P7266_0283	44	1
OG_1016	UDP-N-acetylglucosamine1-carboxyvinyltransferase (EC 2.5.1.7)	A76|A76_2063	UC509_9|UC5099_0564	FG2|FG2_1555	HP|HP_1556	LMG6897|LMG6897_1152	B40|B40_0320	SK11|SK11_0552	AM2|AM2_0443	SK110|SK110_2314	KW10|KW10_1315	KW2|KW2_0488	MG1363|MG1363_0535	NCDO763|NCDO763_0147	N41|N41_1140	V4|V4_2163	LMG8520|LMG8520_1764	IO_1|IO1_0462	LMG8526|LMG8526_2298	KF147|KF147_0545	KF282|KF282_0705	E34|E34_1153	KF201|KF201_0409	M20|M20_2014	ATCC19435|ATCC19435_1178	KF7|KF7_2083	LMG9449|LMG9449_0915	K231|K231_1369	K337|K337_0616	KF24|KF24_0606	Li1|Li1_2211	N42|N42_2495	ML8|ML8_1885	UC317|UC317_2507	KF67|KF67_1707	LMG9446|LMG9446_0594	KF146|KF146_2355	KF134|KF134_0857	KF196|KF196_0391	DRA4|DRA4_0968	IL1403|IL1403_0591	CV56|CV56_0508	KLDS|KLDS_0590	LMG14418|LMG14418_0442	P7266|P7266_0282	44	1
OG_1017	RNA methyltransferase, TrmA family	A76|A76_2530	UC509_9|UC5099_2272	FG2|FG2_0909	HP|HP_0285	LMG6897|LMG6897_0695	B40|B40_0769	SK11|SK11_2512	AM2|AM2_1141	SK110|SK110_2484	KW10|KW10_1562	KW2|KW2_2232	MG1363|MG1363_2547	NCDO763|NCDO763_1305	N41|N41_0112	V4|V4_0141	LMG8520|LMG8520_0855	IO_1|IO1_2245	LMG8526|LMG8526_2379	KF147|KF147_2489	KF282|KF282_1302	E34|E34_1013	KF201|KF201_1066	M20|M20_2063	ATCC19435|ATCC19435_0095	KF7|KF7_2297	LMG9449|LMG9449_0116	K231|K231_2047	K337|K337_2070	KF24|KF24_0389	Li1|Li1_0936	N42|N42_0119	ML8|ML8_0186	UC317|UC317_0118	KF67|KF67_0125	LMG9446|LMG9446_1649	KF146|KF146_1924	KF134|KF134_1086	KF196|KF196_2095	DRA4|DRA4_1175	IL1403|IL1403_2356	CV56|CV56_2327	KLDS|KLDS_2514	LMG14418|LMG14418_1476	P7266|P7266_1990	44	1
OG_1018	Acetyltransferase (EC 2.3.1.-)	A76|A76_2528	UC509_9|UC5099_2270	FG2|FG2_0912	HP|HP_0288	LMG6897|LMG6897_0698	B40|B40_0771	SK11|SK11_2510	AM2|AM2_1139	SK110|SK110_2486	KW10|KW10_1565	KW2|KW2_2230	MG1363|MG1363_2545	NCDO763|NCDO763_1307	N41|N41_0110	V4|V4_0143	LMG8520|LMG8520_0858	IO_1|IO1_2243	LMG8526|LMG8526_2381	KF147|KF147_2487	KF282|KF282_1300	E34|E34_1011	KF201|KF201_1068	M20|M20_2065	ATCC19435|ATCC19435_0097	KF7|KF7_2299	LMG9449|LMG9449_0118	K231|K231_2049	K337|K337_2073	KF24|KF24_0391	Li1|Li1_0938	N42|N42_0121	ML8|ML8_0188	UC317|UC317_0120	KF67|KF67_0127	LMG9446|LMG9446_1651	KF146|KF146_1926	KF134|KF134_1088	KF196|KF196_2093	DRA4|DRA4_1177	IL1403|IL1403_2354	CV56|CV56_2325	KLDS|KLDS_2512	LMG14418|LMG14418_1478	P7266|P7266_1989	44	1
OG_1019	putative MmcQ-like protein	A76|A76_2527	UC509_9|UC5099_2269	FG2|FG2_0913	HP|HP_0289	LMG6897|LMG6897_0699	B40|B40_0772	SK11|SK11_2509	AM2|AM2_1138	SK110|SK110_2487	KW10|KW10_1566	KW2|KW2_2229	MG1363|MG1363_2544	NCDO763|NCDO763_1308	N41|N41_0109	V4|V4_0144	LMG8520|LMG8520_0859	IO_1|IO1_2242	LMG8526|LMG8526_2383	KF147|KF147_2486	KF282|KF282_1299	E34|E34_1010	KF201|KF201_1069	M20|M20_2066	ATCC19435|ATCC19435_0098	KF7|KF7_2300	LMG9449|LMG9449_0119	K231|K231_2050	K337|K337_2074	KF24|KF24_0392	Li1|Li1_0939	N42|N42_0122	ML8|ML8_0189	UC317|UC317_0121	KF67|KF67_0128	LMG9446|LMG9446_1652	KF146|KF146_1927	KF134|KF134_1089	KF196|KF196_2092	DRA4|DRA4_1178	IL1403|IL1403_2353	CV56|CV56_2324	KLDS|KLDS_2511	LMG14418|LMG14418_1479	P7266|P7266_1988	44	1
OG_102	FIG00755099: hypothetical protein	A76|A76_2201	UC509_9|UC5099_1983	FG2|FG2_1978	HP|HP_1053	LMG6897|LMG6897_1812	B40|B40_2619	SK11|SK11_2196	AM2|AM2_0081	SK110|SK110_0831	KW10|KW10_1762	KW2|KW2_1961	MG1363|MG1363_2244	NCDO763|NCDO763_1233	N41|N41_1276	V4|V4_0662	LMG8520|LMG8520_1160 LMG8520|LMG8520_1161	IO_1|IO1_1993	LMG8526|LMG8526_1771	KF147|KF147_2161	KF282|KF282_2416	E34|E34_1399	KF201|KF201_0104 KF201|KF201_1772	M20|M20_0882	ATCC19435|ATCC19435_2572	KF7|KF7_1777 KF7|KF7_1776	LMG9449|LMG9449_1431	K231|K231_1751	K337|K337_0355 K337|K337_2282	KF24|KF24_2592	Li1|Li1_1263 Li1|Li1_1262	N42|N42_0858	ML8|ML8_1947	UC317|UC317_2010	KF67|KF67_2270	LMG9446|LMG9446_2443	KF146|KF146_1912	KF134|KF134_0736	KF196|KF196_1448	DRA4|DRA4_1185	IL1403|IL1403_2059	CV56|CV56_2013	KLDS|KLDS_2184	LMG14418|LMG14418_1028	P7266|P7266_1001	44	1
OG_1020	FIG00755344: hypothetical protein	A76|A76_2526	UC509_9|UC5099_2268	FG2|FG2_0914	HP|HP_0290	LMG6897|LMG6897_0700	B40|B40_0773	SK11|SK11_2508	AM2|AM2_1137	SK110|SK110_2488	KW10|KW10_1567	KW2|KW2_2228	MG1363|MG1363_2543	NCDO763|NCDO763_1309	N41|N41_0108	V4|V4_0145	LMG8520|LMG8520_0860	IO_1|IO1_2241	LMG8526|LMG8526_2384	KF147|KF147_2485	KF282|KF282_1298	E34|E34_1009	KF201|KF201_1070	M20|M20_2067	ATCC19435|ATCC19435_0099	KF7|KF7_2301	LMG9449|LMG9449_0120	K231|K231_2051	K337|K337_2075	KF24|KF24_0393	Li1|Li1_0940	N42|N42_0123	ML8|ML8_0190	UC317|UC317_0122	KF67|KF67_0129	LMG9446|LMG9446_1653	KF146|KF146_1928	KF134|KF134_1090	KF196|KF196_2091	DRA4|DRA4_1179	IL1403|IL1403_2352	CV56|CV56_2323	KLDS|KLDS_2510	LMG14418|LMG14418_1480	P7266|P7266_1987	44	1
OG_1021	Valyl-tRNA synthetase (EC 6.1.1.9)	A76|A76_2522	UC509_9|UC5099_2266	FG2|FG2_0917	HP|HP_0293	LMG6897|LMG6897_0703	B40|B40_0776	SK11|SK11_2504	AM2|AM2_1135	SK110|SK110_2492	KW10|KW10_1569	KW2|KW2_2225	MG1363|MG1363_2539	NCDO763|NCDO763_1313	N41|N41_0104	V4|V4_0149	LMG8520|LMG8520_0862	IO_1|IO1_2239	LMG8526|LMG8526_2386	KF147|KF147_2483	KF282|KF282_1294	E34|E34_1007	KF201|KF201_1072	M20|M20_2069	ATCC19435|ATCC19435_0101	KF7|KF7_2303	LMG9449|LMG9449_0122	K231|K231_2053	K337|K337_2077	KF24|KF24_0395	Li1|Li1_0942	N42|N42_0126	ML8|ML8_0192	UC317|UC317_0124	KF67|KF67_0131	LMG9446|LMG9446_1655	KF146|KF146_1930	KF134|KF134_1092	KF196|KF196_2089	DRA4|DRA4_1183	IL1403|IL1403_2350	CV56|CV56_2321	KLDS|KLDS_2508	LMG14418|LMG14418_1482	P7266|P7266_1985	44	1
OG_1022	NADPH:quinone oxidoreductase 2	A76|A76_2519	UC509_9|UC5099_2263	FG2|FG2_0920	HP|HP_0296	LMG6897|LMG6897_0706	B40|B40_0779	SK11|SK11_2500	AM2|AM2_1132	SK110|SK110_0628	KW10|KW10_1572	KW2|KW2_2222	MG1363|MG1363_2536	NCDO763|NCDO763_1316	N41|N41_0101	V4|V4_0152	LMG8520|LMG8520_0864	IO_1|IO1_2236	LMG8526|LMG8526_2389	KF147|KF147_2480	KF282|KF282_1291	E34|E34_1004	KF201|KF201_1074	M20|M20_2072	ATCC19435|ATCC19435_0103	KF7|KF7_2305	LMG9449|LMG9449_0124	K231|K231_2055	K337|K337_2080	KF24|KF24_0398	Li1|Li1_0944	N42|N42_0129	ML8|ML8_0195	UC317|UC317_0127	KF67|KF67_0133	LMG9446|LMG9446_1658	KF146|KF146_1932	KF134|KF134_1094	KF196|KF196_2087	DRA4|DRA4_0661	IL1403|IL1403_2347	CV56|CV56_2317	KLDS|KLDS_2505	LMG14418|LMG14418_1485	P7266|P7266_1982	44	1
OG_1023	FIG00755430: hypothetical protein	A76|A76_2516	UC509_9|UC5099_2260	FG2|FG2_0924	HP|HP_0300	LMG6897|LMG6897_0710	B40|B40_1896	SK11|SK11_2497	AM2|AM2_1131	SK110|SK110_0631	KW10|KW10_1575	KW2|KW2_2219	MG1363|MG1363_2533	NCDO763|NCDO763_1319	N41|N41_0098	V4|V4_0155	LMG8520|LMG8520_0865	IO_1|IO1_2235	LMG8526|LMG8526_2390	KF147|KF147_2479	KF282|KF282_1290	E34|E34_1003	KF201|KF201_1075	M20|M20_2073	ATCC19435|ATCC19435_0104	KF7|KF7_2306	LMG9449|LMG9449_0125	K231|K231_2056	K337|K337_2081	KF24|KF24_0399	Li1|Li1_0945	N42|N42_0130	ML8|ML8_0196	UC317|UC317_0128	KF67|KF67_0134	LMG9446|LMG9446_1659	KF146|KF146_1933	KF134|KF134_1095	KF196|KF196_2086	DRA4|DRA4_0664	IL1403|IL1403_2346	CV56|CV56_2316	KLDS|KLDS_2504	LMG14418|LMG14418_1486	P7266|P7266_1981	44	1
OG_1024	Glucose-6-phosphate isomerase (EC 5.3.1.9)	A76|A76_2515	UC509_9|UC5099_2259	FG2|FG2_0925	HP|HP_0301	LMG6897|LMG6897_0711	B40|B40_1897	SK11|SK11_2496	AM2|AM2_1130	SK110|SK110_0632	KW10|KW10_1578	KW2|KW2_2217	MG1363|MG1363_2532	NCDO763|NCDO763_1320	N41|N41_0097	V4|V4_0156	LMG8520|LMG8520_0866	IO_1|IO1_2234	LMG8526|LMG8526_2391	KF147|KF147_2478	KF282|KF282_1289	E34|E34_1002	KF201|KF201_1076	M20|M20_2074	ATCC19435|ATCC19435_0105	KF7|KF7_2307	LMG9449|LMG9449_0126	K231|K231_2057	K337|K337_2082	KF24|KF24_0400	Li1|Li1_0946	N42|N42_0131	ML8|ML8_0197	UC317|UC317_0129	KF67|KF67_0135	LMG9446|LMG9446_1660	KF146|KF146_1934	KF134|KF134_1096	KF196|KF196_2085	DRA4|DRA4_0665	IL1403|IL1403_2345	CV56|CV56_2315	KLDS|KLDS_2503	LMG14418|LMG14418_1487	P7266|P7266_1980	44	1
OG_1025	integral membrane protein; transport andbinding protein; multidrug resistance; there is noconnection with the lmrA gene	A76|A76_2510	UC509_9|UC5099_2253	FG2|FG2_1300	HP|HP_0152	LMG6897|LMG6897_1655	B40|B40_1903	SK11|SK11_2491	AM2|AM2_1125	SK110|SK110_0638	KW10|KW10_1582	KW2|KW2_2215	MG1363|MG1363_2528	NCDO763|NCDO763_1324	N41|N41_0556	V4|V4_0160	LMG8520|LMG8520_0869	IO_1|IO1_2232	LMG8526|LMG8526_2395	KF147|KF147_2474	KF282|KF282_1287	E34|E34_1000	KF201|KF201_1078	M20|M20_2076	ATCC19435|ATCC19435_0107	KF7|KF7_2311	LMG9449|LMG9449_0128	K231|K231_2059	K337|K337_2084	KF24|KF24_0404	Li1|Li1_0948	N42|N42_0136	ML8|ML8_0203	UC317|UC317_0135	KF67|KF67_0139	LMG9446|LMG9446_1664	KF146|KF146_1938	KF134|KF134_1100	KF196|KF196_2081	DRA4|DRA4_0670	IL1403|IL1403_2341	CV56|CV56_2309	KLDS|KLDS_2499	LMG14418|LMG14418_1491	P7266|P7266_1977	44	1
OG_1026	16S rRNA (guanine(966)-N(2))-methyltransferase(EC 2.1.1.171)	A76|A76_2509	UC509_9|UC5099_2251	FG2|FG2_1301	HP|HP_0153	LMG6897|LMG6897_1654	B40|B40_1904	SK11|SK11_2490	AM2|AM2_1124	SK110|SK110_0639	KW10|KW10_1583	KW2|KW2_2214	MG1363|MG1363_2527	NCDO763|NCDO763_1325	N41|N41_0557	V4|V4_0161	LMG8520|LMG8520_0870	IO_1|IO1_2231	LMG8526|LMG8526_2396	KF147|KF147_2472	KF282|KF282_1286	E34|E34_0998	KF201|KF201_1079	M20|M20_2077	ATCC19435|ATCC19435_0108	KF7|KF7_2312	LMG9449|LMG9449_0129	K231|K231_2060	K337|K337_2085	KF24|KF24_0406	Li1|Li1_0949	N42|N42_0137	ML8|ML8_0205	UC317|UC317_0136	KF67|KF67_0140	LMG9446|LMG9446_1665	KF146|KF146_1939	KF134|KF134_1101	KF196|KF196_2080	DRA4|DRA4_0671	IL1403|IL1403_2340	CV56|CV56_2308	KLDS|KLDS_2498	LMG14418|LMG14418_1492	P7266|P7266_1976	44	1
OG_1027	Phosphopantetheine adenylyltransferase (EC2.7.7.3)	A76|A76_2508	UC509_9|UC5099_2250	FG2|FG2_1302	HP|HP_0154	LMG6897|LMG6897_1653	B40|B40_1905	SK11|SK11_2489	AM2|AM2_1123	SK110|SK110_0640	KW10|KW10_1584	KW2|KW2_2213	MG1363|MG1363_2526	NCDO763|NCDO763_1326	N41|N41_0558	V4|V4_0162	LMG8520|LMG8520_0871	IO_1|IO1_2230	LMG8526|LMG8526_2397	KF147|KF147_2471	KF282|KF282_1285	E34|E34_0997	KF201|KF201_1080	M20|M20_2078	ATCC19435|ATCC19435_0109	KF7|KF7_2313	LMG9449|LMG9449_0130	K231|K231_2061	K337|K337_2086	KF24|KF24_0407	Li1|Li1_0950	N42|N42_0138	ML8|ML8_0206	UC317|UC317_0137	KF67|KF67_0141	LMG9446|LMG9446_1666	KF146|KF146_1940	KF134|KF134_1102	KF196|KF196_2079	DRA4|DRA4_0672	IL1403|IL1403_2339	CV56|CV56_2307	KLDS|KLDS_2497	LMG14418|LMG14418_1493	P7266|P7266_1975	44	1
OG_1028	Lon-like protease with PDZ domain	A76|A76_2507	UC509_9|UC5099_2249	FG2|FG2_1303	HP|HP_0155	LMG6897|LMG6897_1652	B40|B40_1906	SK11|SK11_2488	AM2|AM2_1122	SK110|SK110_0641	KW10|KW10_1585	KW2|KW2_2212	MG1363|MG1363_2525	NCDO763|NCDO763_1327	N41|N41_0559	V4|V4_0163	LMG8520|LMG8520_0872	IO_1|IO1_2229	LMG8526|LMG8526_2398	KF147|KF147_2470	KF282|KF282_1284	E34|E34_0996	KF201|KF201_1081	M20|M20_2079	ATCC19435|ATCC19435_0110	KF7|KF7_2314	LMG9449|LMG9449_0131	K231|K231_2062	K337|K337_2087	KF24|KF24_0408	Li1|Li1_0951	N42|N42_0139	ML8|ML8_0207	UC317|UC317_0138	KF67|KF67_0142	LMG9446|LMG9446_1667	KF146|KF146_1941	KF134|KF134_1103	KF196|KF196_2078	DRA4|DRA4_0673	IL1403|IL1403_2338	CV56|CV56_2306	KLDS|KLDS_2496	LMG14418|LMG14418_1494	P7266|P7266_1974	44	1
OG_1029	6-phosphogluconolactonase (EC 3.1.1.31)	A76|A76_2496	UC509_9|UC5099_2242	FG2|FG2_2310	HP|HP_1698	LMG6897|LMG6897_2202	B40|B40_2552	SK11|SK11_2481	AM2|AM2_1114	SK110|SK110_1520	KW10|KW10_1593	KW2|KW2_2200	MG1363|MG1363_2514	NCDO763|NCDO763_1338	N41|N41_0570	V4|V4_0134	LMG8520|LMG8520_0883	IO_1|IO1_2221	LMG8526|LMG8526_2407	KF147|KF147_2460	KF282|KF282_1277	E34|E34_0990	KF201|KF201_1085	M20|M20_2085	ATCC19435|ATCC19435_0116	KF7|KF7_2322	LMG9449|LMG9449_0139	K231|K231_2068	K337|K337_2096	KF24|KF24_0414	Li1|Li1_0957	N42|N42_0145	ML8|ML8_0215	UC317|UC317_0146	KF67|KF67_0151	LMG9446|LMG9446_1676	KF146|KF146_1949	KF134|KF134_1111	KF196|KF196_2070	DRA4|DRA4_0700	IL1403|IL1403_2330	CV56|CV56_2299	KLDS|KLDS_2487	LMG14418|LMG14418_1503	P7266|P7266_1972	44	1
OG_103	Relaxase	A76|A76_2700	UC509_9|UC5099_2371 UC509_9|UC5099_2483	FG2|FG2_1118	HP|HP_2426	LMG6897|LMG6897_1466		SK11|SK11_2687	AM2|AM2_0686	SK110|SK110_0647			MG1363|MG1363_1427	NCDO763|NCDO763_2448	N41|N41_0439		LMG8520|LMG8520_2194	IO_1|IO1_1197	LMG8526|LMG8526_2327	KF147|KF147_1354	KF282|KF282_1783	E34|E34_1041	KF201|KF201_0728	M20|M20_1220 M20|M20_1267	ATCC19435|ATCC19435_0247		LMG9449|LMG9449_2076	K231|K231_1741	K337|K337_1919	KF24|KF24_0680 KF24|KF24_1811	Li1|Li1_0102	N42|N42_1489 N42|N42_2670	ML8|ML8_1722	UC317|UC317_1448 UC317|UC317_2023 UC317|UC317_1230	KF67|KF67_0706	LMG9446|LMG9446_0132	KF146|KF146_2218			DRA4|DRA4_0293		CV56|CV56_0004 CV56|CV56_2515	KLDS|KLDS_1279			34	FALSE
OG_1030	SSU ribosomal protein S2p (SAe)	A76|A76_2494	UC509_9|UC5099_2240	FG2|FG2_2311	HP|HP_1699	LMG6897|LMG6897_2203	B40|B40_2553	SK11|SK11_2480	AM2|AM2_1113	SK110|SK110_1521	KW10|KW10_1594	KW2|KW2_2199	MG1363|MG1363_2513	NCDO763|NCDO763_1339	N41|N41_0571	V4|V4_0135	LMG8520|LMG8520_0884	IO_1|IO1_2220	LMG8526|LMG8526_2408	KF147|KF147_2459	KF282|KF282_1276	E34|E34_0989	KF201|KF201_1086	M20|M20_2086	ATCC19435|ATCC19435_0117	KF7|KF7_2323	LMG9449|LMG9449_0140	K231|K231_2069	K337|K337_2097	KF24|KF24_0415	Li1|Li1_0958	N42|N42_0146	ML8|ML8_0216	UC317|UC317_0147	KF67|KF67_0152	LMG9446|LMG9446_1677	KF146|KF146_1950	KF134|KF134_1112	KF196|KF196_2069	DRA4|DRA4_0701	IL1403|IL1403_2329	CV56|CV56_2298	KLDS|KLDS_2486	LMG14418|LMG14418_1504	P7266|P7266_1971	44	1
OG_1031	Translation elongation factor Ts	A76|A76_2493	UC509_9|UC5099_2239	FG2|FG2_2312	HP|HP_1700	LMG6897|LMG6897_2204	B40|B40_2554	SK11|SK11_2479	AM2|AM2_1112	SK110|SK110_1522	KW10|KW10_1595	KW2|KW2_2198	MG1363|MG1363_2512	NCDO763|NCDO763_1340	N41|N41_0572	V4|V4_0136	LMG8520|LMG8520_0885	IO_1|IO1_2219	LMG8526|LMG8526_2409	KF147|KF147_2458	KF282|KF282_1275	E34|E34_0988	KF201|KF201_1087	M20|M20_2087	ATCC19435|ATCC19435_0118	KF7|KF7_2324	LMG9449|LMG9449_0141	K231|K231_2070	K337|K337_2098	KF24|KF24_0416	Li1|Li1_0959	N42|N42_0147	ML8|ML8_0217	UC317|UC317_0148	KF67|KF67_0153	LMG9446|LMG9446_1678	KF146|KF146_1951	KF134|KF134_1113	KF196|KF196_2068	DRA4|DRA4_0702	IL1403|IL1403_2328	CV56|CV56_2297	KLDS|KLDS_2485	LMG14418|LMG14418_1505	P7266|P7266_1970	44	1
OG_1032	Septation ring formation regulator EzrA	A76|A76_2492	UC509_9|UC5099_2238	FG2|FG2_2313	HP|HP_1701	LMG6897|LMG6897_2205	B40|B40_2555	SK11|SK11_2478	AM2|AM2_1111	SK110|SK110_1523	KW10|KW10_1596	KW2|KW2_2197	MG1363|MG1363_2511	NCDO763|NCDO763_1341	N41|N41_0573	V4|V4_0137	LMG8520|LMG8520_0886	IO_1|IO1_2218	LMG8526|LMG8526_2410	KF147|KF147_2457	KF282|KF282_1274	E34|E34_0987	KF201|KF201_1088	M20|M20_2088	ATCC19435|ATCC19435_0119	KF7|KF7_2325	LMG9449|LMG9449_0142	K231|K231_2071	K337|K337_2099	KF24|KF24_0417	Li1|Li1_0960	N42|N42_0148	ML8|ML8_0218	UC317|UC317_0149	KF67|KF67_0154	LMG9446|LMG9446_1679	KF146|KF146_1952	KF134|KF134_1114	KF196|KF196_2067	DRA4|DRA4_0703	IL1403|IL1403_2327	CV56|CV56_2296	KLDS|KLDS_2484	LMG14418|LMG14418_1506	P7266|P7266_1969	44	1
OG_1033	competence factor	A76|A76_2491	UC509_9|UC5099_2237	FG2|FG2_2314	HP|HP_1702	LMG6897|LMG6897_2206	B40|B40_2556	SK11|SK11_2477	AM2|AM2_1110	SK110|SK110_1524	KW10|KW10_1597	KW2|KW2_2196	MG1363|MG1363_2510	NCDO763|NCDO763_1342	N41|N41_0574	V4|V4_0138	LMG8520|LMG8520_0887	IO_1|IO1_2217	LMG8526|LMG8526_2411	KF147|KF147_2456	KF282|KF282_1273	E34|E34_0986	KF201|KF201_1089	M20|M20_2089	ATCC19435|ATCC19435_0120	KF7|KF7_2326	LMG9449|LMG9449_0143	K231|K231_2072	K337|K337_2100	KF24|KF24_0418	Li1|Li1_0961	N42|N42_0149	ML8|ML8_0219	UC317|UC317_0150	KF67|KF67_0155	LMG9446|LMG9446_1680	KF146|KF146_1953	KF134|KF134_1115	KF196|KF196_2066	DRA4|DRA4_0704	IL1403|IL1403_2326	CV56|CV56_2295	KLDS|KLDS_2483	LMG14418|LMG14418_1507	P7266|P7266_1968	44	1
OG_1034	FIG00755718: hypothetical protein	A76|A76_1460	UC509_9|UC5099_1407	FG2|FG2_2167	HP|HP_1673	LMG6897|LMG6897_2333	B40|B40_1772	SK11|SK11_1466	AM2|AM2_1283	SK110|SK110_0799	KW10|KW10_0572	KW2|KW2_1300	MG1363|MG1363_1173	NCDO763|NCDO763_2338	N41|N41_0446	V4|V4_0645	LMG8520|LMG8520_0312	IO_1|IO1_1359	LMG8526|LMG8526_1175	KF147|KF147_1462	KF282|KF282_0949	E34|E34_0765	KF201|KF201_0747	M20|M20_2107	ATCC19435|ATCC19435_0330	KF7|KF7_0425	LMG9449|LMG9449_1402	K231|K231_0718	K337|K337_1810	KF24|KF24_2419	Li1|Li1_1151	N42|N42_1571	ML8|ML8_0297	UC317|UC317_0337	KF67|KF67_0809	LMG9446|LMG9446_0024	KF146|KF146_0512	KF134|KF134_1627	KF196|KF196_0876	DRA4|DRA4_0845	IL1403|IL1403_1440	CV56|CV56_1374	KLDS|KLDS_1487	LMG14418|LMG14418_1145	P7266|P7266_1418	44	1
OG_1035	A/G-specific adenine glycosylase (EC 3.2.2.-)	A76|A76_1709	UC509_9|UC5099_0903	FG2|FG2_2146	HP|HP_1894	LMG6897|LMG6897_2064	B40|B40_1167	SK11|SK11_0896	AM2|AM2_1187	SK110|SK110_0487	KW10|KW10_1048	KW2|KW2_0766	MG1363|MG1363_1783	NCDO763|NCDO763_1470	N41|N41_2311	V4|V4_0565	LMG8520|LMG8520_0684	IO_1|IO1_0812	LMG8526|LMG8526_2151	KF147|KF147_0884	KF282|KF282_1670	E34|E34_1758	KF201|KF201_0089	M20|M20_2127	ATCC19435|ATCC19435_2144	KF7|KF7_2201	LMG9449|LMG9449_0156	K231|K231_1200	K337|K337_0680	KF24|KF24_2384	Li1|Li1_0977	N42|N42_2036	ML8|ML8_1123	UC317|UC317_0380	KF67|KF67_1156	LMG9446|LMG9446_2260	KF146|KF146_2078	KF134|KF134_0847	KF196|KF196_0088	DRA4|DRA4_2280	IL1403|IL1403_0907	CV56|CV56_0862	KLDS|KLDS_0876	LMG14418|LMG14418_0028	P7266|P7266_0593	44	1
OG_1036	Excinuclease ABC subunit C	A76|A76_1710	UC509_9|UC5099_0902	FG2|FG2_2147	HP|HP_1895	LMG6897|LMG6897_2065	B40|B40_1166	SK11|SK11_0895	AM2|AM2_1186	SK110|SK110_0488	KW10|KW10_1049	KW2|KW2_0765	MG1363|MG1363_1784	NCDO763|NCDO763_1469	N41|N41_2312	V4|V4_0564	LMG8520|LMG8520_0683	IO_1|IO1_0811	LMG8526|LMG8526_2150	KF147|KF147_0883	KF282|KF282_1669	E34|E34_1757	KF201|KF201_0088	M20|M20_2128	ATCC19435|ATCC19435_2143	KF7|KF7_2200	LMG9449|LMG9449_0157	K231|K231_1201	K337|K337_0681	KF24|KF24_2383	Li1|Li1_0978	N42|N42_2035	ML8|ML8_1122	UC317|UC317_0379	KF67|KF67_1155	LMG9446|LMG9446_2259	KF146|KF146_2077	KF134|KF134_0846	KF196|KF196_0087	DRA4|DRA4_2281	IL1403|IL1403_0906	CV56|CV56_0861	KLDS|KLDS_0875	LMG14418|LMG14418_0027	P7266|P7266_0595	44	1
OG_1037	SSU ribosomal protein S1p	A76|A76_1720	UC509_9|UC5099_0896	FG2|FG2_2153	HP|HP_1901	LMG6897|LMG6897_2071	B40|B40_1160	SK11|SK11_0889	AM2|AM2_1183	SK110|SK110_0494	KW10|KW10_1052	KW2|KW2_0759	MG1363|MG1363_1792	NCDO763|NCDO763_1461	N41|N41_2319	V4|V4_0557	LMG8520|LMG8520_0680	IO_1|IO1_0805	LMG8526|LMG8526_2147	KF147|KF147_0880	KF282|KF282_1663	E34|E34_1067	KF201|KF201_0085	M20|M20_2131	ATCC19435|ATCC19435_2140	KF7|KF7_2197	LMG9449|LMG9449_0160	K231|K231_1207	K337|K337_0684	KF24|KF24_2380	Li1|Li1_0981	N42|N42_2031	ML8|ML8_1119	UC317|UC317_0376	KF67|KF67_1152	LMG9446|LMG9446_2256	KF146|KF146_2074	KF134|KF134_0843	KF196|KF196_0084	DRA4|DRA4_2287	IL1403|IL1403_0902	CV56|CV56_0858	KLDS|KLDS_0872	LMG14418|LMG14418_0024	P7266|P7266_0609	44	1
OG_1038	tRNA-specific 2-thiouridylase MnmA	A76|A76_1721	UC509_9|UC5099_0895	FG2|FG2_2154	HP|HP_1902	LMG6897|LMG6897_2072	B40|B40_1215	SK11|SK11_0888	AM2|AM2_1182	SK110|SK110_0495	KW10|KW10_1053	KW2|KW2_0758	MG1363|MG1363_1793	NCDO763|NCDO763_1460	N41|N41_2320	V4|V4_0556	LMG8520|LMG8520_0679	IO_1|IO1_0804	LMG8526|LMG8526_2146	KF147|KF147_0879	KF282|KF282_1662	E34|E34_1068	KF201|KF201_0084	M20|M20_2132	ATCC19435|ATCC19435_2139	KF7|KF7_2196	LMG9449|LMG9449_0161	K231|K231_1208	K337|K337_0685	KF24|KF24_2379	Li1|Li1_0982	N42|N42_2030	ML8|ML8_1118	UC317|UC317_0375	KF67|KF67_1151	LMG9446|LMG9446_2255	KF146|KF146_2073	KF134|KF134_0842	KF196|KF196_0083	DRA4|DRA4_2288	IL1403|IL1403_0901	CV56|CV56_0857	KLDS|KLDS_0871	LMG14418|LMG14418_0023	P7266|P7266_0611	44	1
OG_1039	Lead, cadmium, zinc and mercury transportingATPase (EC 3.6.3.3) (EC 3.6.3.5); Copper-translocatingP-type ATPase (EC 3.6.3.4)	A76|A76_1725	UC509_9|UC5099_0891	FG2|FG2_2158	HP|HP_1906	LMG6897|LMG6897_2076	B40|B40_1219	SK11|SK11_0884	AM2|AM2_1178	SK110|SK110_0499	KW10|KW10_1057	KW2|KW2_0754	MG1363|MG1363_1797	NCDO763|NCDO763_1456	N41|N41_2324	V4|V4_0552	LMG8520|LMG8520_1223	IO_1|IO1_0800	LMG8526|LMG8526_2142	KF147|KF147_0875	KF282|KF282_1658	E34|E34_1072	KF201|KF201_0080	M20|M20_2136	ATCC19435|ATCC19435_2135	KF7|KF7_2192	LMG9449|LMG9449_0165	K231|K231_1212	K337|K337_0689	KF24|KF24_2375	Li1|Li1_0986	N42|N42_2026	ML8|ML8_1114	UC317|UC317_1960	KF67|KF67_1147	LMG9446|LMG9446_2251	KF146|KF146_2069	KF134|KF134_0838	KF196|KF196_0079	DRA4|DRA4_2292	IL1403|IL1403_0897	CV56|CV56_0852	KLDS|KLDS_0867	LMG14418|LMG14418_0019	P7266|P7266_0614	44	1
OG_104	Mobile element protein	A76|A76_1021 A76|A76_1950	UC509_9|UC5099_2487	FG2|FG2_1577 FG2|FG2_2122	HP|HP_1644	LMG6897|LMG6897_1203	B40|B40_2252	SK11|SK11_2666	AM2|AM2_1885 AM2|AM2_1932				MG1363|MG1363_0641 MG1363|MG1363_0764 MG1363|MG1363_1085 MG1363|MG1363_1316 MG1363|MG1363_1761 MG1363|MG1363_1778 MG1363|MG1363_2042			V4|V4_1363 V4|V4_2179 V4|V4_0174				KF147|KF147_0105 KF147|KF147_0700 KF147|KF147_0725 KF147|KF147_0897 KF147|KF147_1332				M20|M20_0108		KF7|KF7_2093 KF7|KF7_2279	LMG9449|LMG9449_0682 LMG9449|LMG9449_1433	K231|K231_2075 K231|K231_1737		KF24|KF24_1659	Li1|Li1_2228	N42|N42_0689	ML8|ML8_0986			LMG9446|LMG9446_1966 LMG9446|LMG9446_1485		KF134|KF134_1232				CV56|CV56_2546				22	FALSE
OG_1040	Copper chaperone	A76|A76_1726	UC509_9|UC5099_0890	FG2|FG2_2159	HP|HP_1907	LMG6897|LMG6897_2077	B40|B40_1220	SK11|SK11_0883	AM2|AM2_1177	SK110|SK110_0500	KW10|KW10_1058	KW2|KW2_0753	MG1363|MG1363_1798	NCDO763|NCDO763_1455	N41|N41_2325	V4|V4_0551	LMG8520|LMG8520_1224	IO_1|IO1_0799	LMG8526|LMG8526_2141	KF147|KF147_0874	KF282|KF282_1657	E34|E34_1073	KF201|KF201_0079	M20|M20_2137	ATCC19435|ATCC19435_2134	KF7|KF7_2191	LMG9449|LMG9449_0166	K231|K231_1213	K337|K337_0690	KF24|KF24_2374	Li1|Li1_0987	N42|N42_2025	ML8|ML8_1113	UC317|UC317_1961	KF67|KF67_1146	LMG9446|LMG9446_2250	KF146|KF146_2068	KF134|KF134_0837	KF196|KF196_0078	DRA4|DRA4_2293	IL1403|IL1403_0896	CV56|CV56_0851	KLDS|KLDS_0866	LMG14418|LMG14418_0018	P7266|P7266_0615	44	1
OG_1041	Negative transcriptional regulator-coppertransport operon	A76|A76_1727	UC509_9|UC5099_0889	FG2|FG2_2160	HP|HP_1908	LMG6897|LMG6897_2078	B40|B40_1221	SK11|SK11_0882	AM2|AM2_1176	SK110|SK110_0501	KW10|KW10_1059	KW2|KW2_0752	MG1363|MG1363_1799	NCDO763|NCDO763_1454	N41|N41_2326	V4|V4_0550	LMG8520|LMG8520_1225	IO_1|IO1_0798	LMG8526|LMG8526_2140	KF147|KF147_0873	KF282|KF282_1656	E34|E34_1074	KF201|KF201_0078	M20|M20_2138	ATCC19435|ATCC19435_2133	KF7|KF7_2190	LMG9449|LMG9449_0167	K231|K231_1214	K337|K337_0691	KF24|KF24_2373	Li1|Li1_0988	N42|N42_2024	ML8|ML8_1112	UC317|UC317_1962	KF67|KF67_1145	LMG9446|LMG9446_2249	KF146|KF146_2067	KF134|KF134_0836	KF196|KF196_0077	DRA4|DRA4_2294	IL1403|IL1403_0895	CV56|CV56_0850	KLDS|KLDS_0865	LMG14418|LMG14418_0017	P7266|P7266_0616	44	1
OG_1042	L-serine dehydratase, alpha subunit (EC4.3.1.17)	A76|A76_1728	UC509_9|UC5099_0888	FG2|FG2_2161	HP|HP_1909	LMG6897|LMG6897_2079	B40|B40_1222	SK11|SK11_0881	AM2|AM2_1175	SK110|SK110_0502	KW10|KW10_1060	KW2|KW2_0751	MG1363|MG1363_1800	NCDO763|NCDO763_1453	N41|N41_2327	V4|V4_0549	LMG8520|LMG8520_1226	IO_1|IO1_0797	LMG8526|LMG8526_2139	KF147|KF147_0872	KF282|KF282_1655	E34|E34_1075	KF201|KF201_0077	M20|M20_2139	ATCC19435|ATCC19435_2132	KF7|KF7_2189	LMG9449|LMG9449_0168	K231|K231_1215	K337|K337_0692	KF24|KF24_2372	Li1|Li1_0989	N42|N42_2023	ML8|ML8_1111	UC317|UC317_1963	KF67|KF67_1144	LMG9446|LMG9446_2248	KF146|KF146_2066	KF134|KF134_0835	KF196|KF196_0076	DRA4|DRA4_2295	IL1403|IL1403_0894	CV56|CV56_0849	KLDS|KLDS_0864	LMG14418|LMG14418_0016	P7266|P7266_0617	44	1
OG_1043	L-serine dehydratase, beta subunit (EC4.3.1.17)	A76|A76_1729	UC509_9|UC5099_0887	FG2|FG2_2162	HP|HP_1910	LMG6897|LMG6897_2080	B40|B40_1223	SK11|SK11_0880	AM2|AM2_1174	SK110|SK110_0503	KW10|KW10_1061	KW2|KW2_0750	MG1363|MG1363_1801	NCDO763|NCDO763_1452	N41|N41_2328	V4|V4_0548	LMG8520|LMG8520_1227	IO_1|IO1_0796	LMG8526|LMG8526_2138	KF147|KF147_0871	KF282|KF282_1654	E34|E34_1076	KF201|KF201_0076	M20|M20_2140	ATCC19435|ATCC19435_2131	KF7|KF7_2188	LMG9449|LMG9449_0169	K231|K231_1216	K337|K337_0693	KF24|KF24_2371	Li1|Li1_0990	N42|N42_2022	ML8|ML8_1110	UC317|UC317_1964	KF67|KF67_1143	LMG9446|LMG9446_2247	KF146|KF146_2065	KF134|KF134_0834	KF196|KF196_0075	DRA4|DRA4_2296	IL1403|IL1403_0893	CV56|CV56_0848	KLDS|KLDS_0863	LMG14418|LMG14418_0015	P7266|P7266_0618	44	1
OG_1044	FIG00755390: hypothetical protein	A76|A76_1737	UC509_9|UC5099_0882	FG2|FG2_1316	HP|HP_0524	LMG6897|LMG6897_2039	B40|B40_0165	SK11|SK11_0873	AM2|AM2_2408	SK110|SK110_0533	KW10|KW10_1064	KW2|KW2_0747	MG1363|MG1363_1804	NCDO763|NCDO763_1449	N41|N41_2202	V4|V4_0545		IO_1|IO1_0793	LMG8526|LMG8526_2135	KF147|KF147_0868	KF282|KF282_1651	E34|E34_1079	KF201|KF201_0073	M20|M20_2143	ATCC19435|ATCC19435_2128	KF7|KF7_2185	LMG9449|LMG9449_0172	K231|K231_1219	K337|K337_0696	KF24|KF24_2368	Li1|Li1_0993	N42|N42_2019	ML8|ML8_1724	UC317|UC317_1725	KF67|KF67_1140	LMG9446|LMG9446_2244	KF146|KF146_2062	KF134|KF134_0831	KF196|KF196_0072	DRA4|DRA4_0910	IL1403|IL1403_0884	CV56|CV56_0845	KLDS|KLDS_0860	LMG14418|LMG14418_0012	P7266|P7266_1415 P7266|P7266_0622	43	FALSE
OG_1045	Alpha/beta hydrolase fold (EC 3.8.1.5)	A76|A76_1738	UC509_9|UC5099_0881	FG2|FG2_1317	HP|HP_0523	LMG6897|LMG6897_2038	B40|B40_0164	SK11|SK11_0872	AM2|AM2_2409	SK110|SK110_0532	KW10|KW10_1065	KW2|KW2_0746	MG1363|MG1363_1805	NCDO763|NCDO763_1448	N41|N41_2203	V4|V4_0544	LMG8520|LMG8520_1230	IO_1|IO1_0792	LMG8526|LMG8526_2134	KF147|KF147_0867	KF282|KF282_1650	E34|E34_1080	KF201|KF201_0072	M20|M20_2144	ATCC19435|ATCC19435_2127	KF7|KF7_2184	LMG9449|LMG9449_0173	K231|K231_1220	K337|K337_0697	KF24|KF24_2367	Li1|Li1_0994	N42|N42_2018	ML8|ML8_1725	UC317|UC317_1724	KF67|KF67_1139	LMG9446|LMG9446_2243	KF146|KF146_2061	KF134|KF134_0830	KF196|KF196_0071	DRA4|DRA4_0909	IL1403|IL1403_0883	CV56|CV56_0844	KLDS|KLDS_0859	LMG14418|LMG14418_0011	P7266|P7266_0624	44	1
OG_1046	Leucyl-tRNA synthetase (EC 6.1.1.4)	A76|A76_1742	UC509_9|UC5099_0876	FG2|FG2_1323	HP|HP_0518	LMG6897|LMG6897_2033	B40|B40_0158	SK11|SK11_0867	AM2|AM2_2413	SK110|SK110_0526	KW10|KW10_1069	KW2|KW2_0741	MG1363|MG1363_1810	NCDO763|NCDO763_1443	N41|N41_2209	V4|V4_0540	LMG8520|LMG8520_1234	IO_1|IO1_0787	LMG8526|LMG8526_2130	KF147|KF147_0863	KF282|KF282_1646	E34|E34_1084	KF201|KF201_0068	M20|M20_2148	ATCC19435|ATCC19435_2123	KF7|KF7_2180	LMG9449|LMG9449_0177	K231|K231_1224	K337|K337_0701	KF24|KF24_2363	Li1|Li1_0998	N42|N42_2014	ML8|ML8_1729	UC317|UC317_1720	KF67|KF67_1135	LMG9446|LMG9446_2239	KF146|KF146_2057	KF134|KF134_0826	KF196|KF196_0067	DRA4|DRA4_0903	IL1403|IL1403_0879	CV56|CV56_0840	KLDS|KLDS_0855	LMG14418|LMG14418_0007	P7266|P7266_0625	44	1
OG_1047	FIG00755282: hypothetical protein	A76|A76_1743	UC509_9|UC5099_0875	FG2|FG2_1324	HP|HP_0517	LMG6897|LMG6897_2032	B40|B40_0157	SK11|SK11_0866	AM2|AM2_2414	SK110|SK110_0525	KW10|KW10_1070	KW2|KW2_0740	MG1363|MG1363_1811	NCDO763|NCDO763_1442	N41|N41_2210	V4|V4_0539	LMG8520|LMG8520_1235	IO_1|IO1_0786	LMG8526|LMG8526_2129	KF147|KF147_0862	KF282|KF282_1645	E34|E34_1085	KF201|KF201_0067	M20|M20_2149	ATCC19435|ATCC19435_2122	KF7|KF7_2179	LMG9449|LMG9449_0178	K231|K231_1225	K337|K337_0702	KF24|KF24_2362	Li1|Li1_0999	N42|N42_2013	ML8|ML8_1730	UC317|UC317_1719	KF67|KF67_1134	LMG9446|LMG9446_2238	KF146|KF146_2056	KF134|KF134_0825	KF196|KF196_0066	DRA4|DRA4_0902	IL1403|IL1403_0878	CV56|CV56_0839	KLDS|KLDS_0854	LMG14418|LMG14418_0006	P7266|P7266_0626	44	1
OG_1048	Ribose-phosphate pyrophosphokinase (EC2.7.6.1)	A76|A76_1744	UC509_9|UC5099_0874	FG2|FG2_1325	HP|HP_0516	LMG6897|LMG6897_2031	B40|B40_0156	SK11|SK11_0865	AM2|AM2_2415	SK110|SK110_0524	KW10|KW10_1071	KW2|KW2_0739	MG1363|MG1363_1812	NCDO763|NCDO763_1441	N41|N41_2211	V4|V4_0538	LMG8520|LMG8520_1236	IO_1|IO1_0785	LMG8526|LMG8526_2128	KF147|KF147_0861	KF282|KF282_1644	E34|E34_1086	KF201|KF201_0066	M20|M20_2150	ATCC19435|ATCC19435_2121	KF7|KF7_2178	LMG9449|LMG9449_0179	K231|K231_1226	K337|K337_0703	KF24|KF24_2361	Li1|Li1_1000	N42|N42_2012	ML8|ML8_1731	UC317|UC317_1718	KF67|KF67_1133	LMG9446|LMG9446_2237	KF146|KF146_2055	KF134|KF134_0824	KF196|KF196_0065	DRA4|DRA4_0901	IL1403|IL1403_0877	CV56|CV56_0838	KLDS|KLDS_0853	LMG14418|LMG14418_0005	P7266|P7266_0627	44	1
OG_1049	Hydrolase (HAD superfamily)	A76|A76_1747	UC509_9|UC5099_0871	FG2|FG2_1328	HP|HP_0513	LMG6897|LMG6897_2028	B40|B40_0153	SK11|SK11_0861	AM2|AM2_0887	SK110|SK110_0521	KW10|KW10_1074	KW2|KW2_0736	MG1363|MG1363_1815	NCDO763|NCDO763_1438	N41|N41_2214	V4|V4_0535	LMG8520|LMG8520_1239	IO_1|IO1_0782	LMG8526|LMG8526_2125	KF147|KF147_0858	KF282|KF282_1641	E34|E34_1089	KF201|KF201_0063	M20|M20_2153	ATCC19435|ATCC19435_2118	KF7|KF7_2175	LMG9449|LMG9449_0182	K231|K231_1229	K337|K337_0706	KF24|KF24_2358	Li1|Li1_1003	N42|N42_2009	ML8|ML8_1734	UC317|UC317_1715	KF67|KF67_1130	LMG9446|LMG9446_2234	KF146|KF146_2052	KF134|KF134_0821	KF196|KF196_0062	DRA4|DRA4_0898	IL1403|IL1403_0874	CV56|CV56_0835	KLDS|KLDS_0850	LMG14418|LMG14418_0002	P7266|P7266_0630	44	1
OG_105	Uronate isomerase (EC 5.3.1.12)	A76|A76_0873	UC509_9|UC5099_1663	FG2|FG2_2442	HP|HP_0649	LMG6897|LMG6897_2331	B40|B40_1057	SK11|SK11_1769	AM2|AM2_0978	SK110|SK110_0695	KW10|KW10_0294	KW2|KW2_1587	MG1363|MG1363_0887	NCDO763|NCDO763_0037	N41|N41_1959	V4|V4_1347		IO_1|IO1_1620	LMG8526|LMG8526_1834 LMG8526|LMG8526_1959	KF147|KF147_1763 KF147|KF147_1834	KF282|KF282_1402	E34|E34_0622	KF201|KF201_2136	M20|M20_1370	ATCC19435|ATCC19435_0018	KF7|KF7_0782 KF7|KF7_0809	LMG9449|LMG9449_0531	K231|K231_2265	K337|K337_2224	KF24|KF24_0558	Li1|Li1_0140	N42|N42_1671	ML8|ML8_0544	UC317|UC317_0967	KF67|KF67_0157 KF67|KF67_1169 KF67|KF67_1193	LMG9446|LMG9446_2065 LMG9446|LMG9446_2334	KF146|KF146_1561 KF146|KF146_2453	KF134|KF134_2346	KF196|KF196_1003 KF196|KF196_2228	DRA4|DRA4_0738	IL1403|IL1403_1760	CV56|CV56_1633	KLDS|KLDS_1806	LMG14418|LMG14418_2186		42	FALSE
OG_1050	Integral membrane protein	A76|A76_1750	UC509_9|UC5099_0868	FG2|FG2_1332	HP|HP_0509	LMG6897|LMG6897_2024	B40|B40_0150	SK11|SK11_0858	AM2|AM2_0884	SK110|SK110_0519	KW10|KW10_1076	KW2|KW2_0734	MG1363|MG1363_1817	NCDO763|NCDO763_1436	N41|N41_2216	V4|V4_0533	LMG8520|LMG8520_2413	IO_1|IO1_0780	LMG8526|LMG8526_2123	KF147|KF147_0856	KF282|KF282_1638	E34|E34_1091	KF201|KF201_0061	M20|M20_2155	ATCC19435|ATCC19435_2116	KF7|KF7_2173	LMG9449|LMG9449_0185	K231|K231_1232	K337|K337_0708	KF24|KF24_2356	Li1|Li1_1006	N42|N42_2006	ML8|ML8_1738	UC317|UC317_1712	KF67|KF67_1128	LMG9446|LMG9446_2232	KF146|KF146_2050	KF134|KF134_0819	KF196|KF196_0060	DRA4|DRA4_0895	IL1403|IL1403_0871	CV56|CV56_0832	KLDS|KLDS_0847	LMG14418|LMG14418_0772	P7266|P7266_0632	44	1
OG_1051	Transporter	A76|A76_1751	UC509_9|UC5099_0867	FG2|FG2_1333	HP|HP_0508	LMG6897|LMG6897_2023	B40|B40_0149	SK11|SK11_0857	AM2|AM2_0883	SK110|SK110_0518	KW10|KW10_1077	KW2|KW2_0733	MG1363|MG1363_1818	NCDO763|NCDO763_1435	N41|N41_2217	V4|V4_0532	LMG8520|LMG8520_2414	IO_1|IO1_0779	LMG8526|LMG8526_2122	KF147|KF147_0855	KF282|KF282_1637	E34|E34_1092	KF201|KF201_0060	M20|M20_2156	ATCC19435|ATCC19435_2115	KF7|KF7_2172	LMG9449|LMG9449_0186	K231|K231_1233	K337|K337_0709	KF24|KF24_2355	Li1|Li1_1007	N42|N42_2005	ML8|ML8_1739	UC317|UC317_1711	KF67|KF67_1127	LMG9446|LMG9446_2231	KF146|KF146_2049	KF134|KF134_0818	KF196|KF196_0059	DRA4|DRA4_0894	IL1403|IL1403_0870	CV56|CV56_0831	KLDS|KLDS_0846	LMG14418|LMG14418_0773	P7266|P7266_0633	44	1
OG_1052	FIG00755312: hypothetical protein	A76|A76_1752	UC509_9|UC5099_0866	FG2|FG2_1334	HP|HP_0507	LMG6897|LMG6897_2022	B40|B40_0148	SK11|SK11_0856	AM2|AM2_0882	SK110|SK110_0517	KW10|KW10_1078	KW2|KW2_0732	MG1363|MG1363_1819	NCDO763|NCDO763_1434	N41|N41_2218	V4|V4_0531	LMG8520|LMG8520_2415	IO_1|IO1_0778	LMG8526|LMG8526_2121	KF147|KF147_0854	KF282|KF282_1636	E34|E34_1093	KF201|KF201_0059	M20|M20_2157	ATCC19435|ATCC19435_2114	KF7|KF7_2171	LMG9449|LMG9449_0187	K231|K231_1234	K337|K337_0710	KF24|KF24_2354	Li1|Li1_1008	N42|N42_2004	ML8|ML8_1740	UC317|UC317_1710	KF67|KF67_1126	LMG9446|LMG9446_2230	KF146|KF146_2048	KF134|KF134_0817	KF196|KF196_0058	DRA4|DRA4_0893	IL1403|IL1403_0869	CV56|CV56_0830	KLDS|KLDS_0845	LMG14418|LMG14418_0774	P7266|P7266_0634	44	1
OG_1053	Chromosome partition protein smc	A76|A76_1754	UC509_9|UC5099_0864	FG2|FG2_1336	HP|HP_0505	LMG6897|LMG6897_2020	B40|B40_0146	SK11|SK11_0854	AM2|AM2_0880	SK110|SK110_0515	KW10|KW10_1080	KW2|KW2_0730	MG1363|MG1363_1821	NCDO763|NCDO763_1432	N41|N41_2220	V4|V4_0529	LMG8520|LMG8520_2417	IO_1|IO1_0776	LMG8526|LMG8526_2119	KF147|KF147_0852	KF282|KF282_1634	E34|E34_1095	KF201|KF201_0057	M20|M20_2159	ATCC19435|ATCC19435_2112	KF7|KF7_2169	LMG9449|LMG9449_0189	K231|K231_1236	K337|K337_0712	KF24|KF24_2352	Li1|Li1_1010	N42|N42_2002	ML8|ML8_1742	UC317|UC317_1708	KF67|KF67_1124	LMG9446|LMG9446_2228	KF146|KF146_2046	KF134|KF134_0815	KF196|KF196_0056	DRA4|DRA4_0891	IL1403|IL1403_0866	CV56|CV56_0828	KLDS|KLDS_0843	LMG14418|LMG14418_0776	P7266|P7266_0636	44	1
OG_1054	Ribonuclease III (EC 3.1.26.3)	A76|A76_1755	UC509_9|UC5099_0863	FG2|FG2_1337	HP|HP_0504	LMG6897|LMG6897_2019	B40|B40_0145	SK11|SK11_0853	AM2|AM2_0879	SK110|SK110_0514	KW10|KW10_1081	KW2|KW2_0729	MG1363|MG1363_1822	NCDO763|NCDO763_1431	N41|N41_2221	V4|V4_0528	LMG8520|LMG8520_2418	IO_1|IO1_0775	LMG8526|LMG8526_2118	KF147|KF147_0851	KF282|KF282_1633	E34|E34_1096	KF201|KF201_0056	M20|M20_2160	ATCC19435|ATCC19435_2111	KF7|KF7_2168	LMG9449|LMG9449_0190	K231|K231_1237	K337|K337_0713	KF24|KF24_2351	Li1|Li1_1011	N42|N42_2001	ML8|ML8_1743	UC317|UC317_1707	KF67|KF67_1123	LMG9446|LMG9446_2227	KF146|KF146_2045	KF134|KF134_0814	KF196|KF196_0055	DRA4|DRA4_0890	IL1403|IL1403_0865	CV56|CV56_0827	KLDS|KLDS_0842	LMG14418|LMG14418_0777	P7266|P7266_0637	44	1
OG_1055	Rrf2-linked NADH-flavin reductase	A76|A76_1768	UC509_9|UC5099_0849	FG2|FG2_2605	HP|HP_1261	LMG6897|LMG6897_1795	B40|B40_2206	SK11|SK11_0839	AM2|AM2_0873	SK110|SK110_1575	KW10|KW10_1088	KW2|KW2_0722	MG1363|MG1363_1828	NCDO763|NCDO763_1425	N41|N41_2227	V4|V4_0522	LMG8520|LMG8520_2426	IO_1|IO1_0769	LMG8526|LMG8526_2112	KF147|KF147_0845	KF282|KF282_1627	E34|E34_1102	KF201|KF201_0050	M20|M20_2166	ATCC19435|ATCC19435_2105	KF7|KF7_2162	LMG9449|LMG9449_0196	K231|K231_1243	K337|K337_0719	KF24|KF24_2345	Li1|Li1_1017	N42|N42_1995	ML8|ML8_1749	UC317|UC317_1701	KF67|KF67_1117	LMG9446|LMG9446_2221	KF146|KF146_2039	KF134|KF134_0808	KF196|KF196_0049	DRA4|DRA4_0965	IL1403|IL1403_0859	CV56|CV56_0821	KLDS|KLDS_0836	LMG14418|LMG14418_0784	P7266|P7266_0638	44	1
OG_1056	Substrate-specific component QueT (COG4708) ofpredicted queuosine-regulated ECF transporter	A76|A76_1769	UC509_9|UC5099_0848	FG2|FG2_2604	HP|HP_1260	LMG6897|LMG6897_1794	B40|B40_2205	SK11|SK11_0838	AM2|AM2_0872	SK110|SK110_1574	KW10|KW10_1089	KW2|KW2_0721	MG1363|MG1363_1829	NCDO763|NCDO763_1424	N41|N41_2228	V4|V4_0521	LMG8520|LMG8520_2427	IO_1|IO1_0768	LMG8526|LMG8526_2111	KF147|KF147_0844	KF282|KF282_1626	E34|E34_1103	KF201|KF201_0049	M20|M20_2167	ATCC19435|ATCC19435_2104	KF7|KF7_2161	LMG9449|LMG9449_0197	K231|K231_1244	K337|K337_0720	KF24|KF24_2344	Li1|Li1_1018	N42|N42_1994	ML8|ML8_1750	UC317|UC317_1700	KF67|KF67_1116	LMG9446|LMG9446_2220	KF146|KF146_2038	KF134|KF134_0807	KF196|KF196_0048	DRA4|DRA4_0964	IL1403|IL1403_0858	CV56|CV56_0820	KLDS|KLDS_0835	LMG14418|LMG14418_0785	P7266|P7266_0639	44	1
OG_1057	Short-chain alcohol dehydrogenase	A76|A76_1772	UC509_9|UC5099_0846	FG2|FG2_2602	HP|HP_1258	LMG6897|LMG6897_1792	B40|B40_2203	SK11|SK11_0835	AM2|AM2_0870	SK110|SK110_1571	KW10|KW10_1092	KW2|KW2_0720	MG1363|MG1363_1830	NCDO763|NCDO763_1423	N41|N41_2229	V4|V4_0520	LMG8520|LMG8520_2429	IO_1|IO1_0765	LMG8526|LMG8526_2108	KF147|KF147_0843	KF282|KF282_1625	E34|E34_1105	KF201|KF201_0047	M20|M20_2169	ATCC19435|ATCC19435_2102	KF7|KF7_2160	LMG9449|LMG9449_0199	K231|K231_1246	K337|K337_0722	KF24|KF24_2342	Li1|Li1_1019	N42|N42_1992	ML8|ML8_1752	UC317|UC317_1698	KF67|KF67_1114	LMG9446|LMG9446_2218	KF146|KF146_2036	KF134|KF134_0805	KF196|KF196_0046	DRA4|DRA4_0961	IL1403|IL1403_0856	CV56|CV56_0818	KLDS|KLDS_0833	LMG14418|LMG14418_0786	P7266|P7266_0640	44	1
OG_1058	hypothetical protein	A76|A76_1773	UC509_9|UC5099_0845	FG2|FG2_2601	HP|HP_1257	LMG6897|LMG6897_1791	B40|B40_2202	SK11|SK11_0834	AM2|AM2_0869	SK110|SK110_1570	KW10|KW10_1093	KW2|KW2_0719	MG1363|MG1363_1831	NCDO763|NCDO763_1422	N41|N41_2230	V4|V4_0519	LMG8520|LMG8520_2430	IO_1|IO1_0764	LMG8526|LMG8526_2107	KF147|KF147_0842	KF282|KF282_1624	E34|E34_1106	KF201|KF201_0046	M20|M20_2170	ATCC19435|ATCC19435_2101	KF7|KF7_2159	LMG9449|LMG9449_0200	K231|K231_1247	K337|K337_0723	KF24|KF24_2341	Li1|Li1_1020	N42|N42_1991	ML8|ML8_1753	UC317|UC317_1697	KF67|KF67_1113	LMG9446|LMG9446_2217	KF146|KF146_2035	KF134|KF134_0804	KF196|KF196_0045	DRA4|DRA4_0960	IL1403|IL1403_0855	CV56|CV56_0817	KLDS|KLDS_0832	LMG14418|LMG14418_0787	P7266|P7266_0641	44	1
OG_1059	Methionyl-tRNA synthetase (EC 6.1.1.10)	A76|A76_1775	UC509_9|UC5099_0844	FG2|FG2_2599	HP|HP_1255	LMG6897|LMG6897_1789	B40|B40_2200	SK11|SK11_0832	AM2|AM2_0867	SK110|SK110_1568	KW10|KW10_1094	KW2|KW2_0718	MG1363|MG1363_1832	NCDO763|NCDO763_1421	N41|N41_2231	V4|V4_0518	LMG8520|LMG8520_2432	IO_1|IO1_0763	LMG8526|LMG8526_2105	KF147|KF147_0840	KF282|KF282_1623	E34|E34_1108	KF201|KF201_0044	M20|M20_2171	ATCC19435|ATCC19435_2100	KF7|KF7_2158	LMG9449|LMG9449_0201	K231|K231_1248	K337|K337_0724	KF24|KF24_2339	Li1|Li1_1022	N42|N42_1989	ML8|ML8_1755	UC317|UC317_1695	KF67|KF67_1111	LMG9446|LMG9446_2215	KF146|KF146_2033	KF134|KF134_0802	KF196|KF196_0043	DRA4|DRA4_0958	IL1403|IL1403_0853	CV56|CV56_0815	KLDS|KLDS_0830	LMG14418|LMG14418_0789	P7266|P7266_0642	44	1
OG_106	MutT/nudix family protein	A76|A76_2187	UC509_9|UC5099_1969	FG2|FG2_1992	HP|HP_1067	LMG6897|LMG6897_1826	B40|B40_2634	SK11|SK11_2182	AM2|AM2_2165	SK110|SK110_0845	KW10|KW10_1776	KW2|KW2_1947	MG1363|MG1363_2229	NCDO763|NCDO763_1248	N41|N41_1291	V4|V4_1394	LMG8520|LMG8520_0966	IO_1|IO1_1978	LMG8526|LMG8526_0700	KF147|KF147_2147	KF282|KF282_2430	E34|E34_1413	KF201|KF201_0689	M20|M20_0896	ATCC19435|ATCC19435_1993	KF7|KF7_2268	LMG9449|LMG9449_0499	K231|K231_2168	K337|K337_0342	KF24|KF24_0008	Li1|Li1_1603	N42|N42_0871 N42|N42_0872	ML8|ML8_2558	UC317|UC317_2464	KF67|KF67_2284 KF67|KF67_2285	LMG9446|LMG9446_2430 LMG9446|LMG9446_2429	KF146|KF146_1898 KF146|KF146_1897	KF134|KF134_0722 KF134|KF134_0721	KF196|KF196_1462 KF196|KF196_1463	DRA4|DRA4_1199	IL1403|IL1403_2043	CV56|CV56_2000	KLDS|KLDS_2170	LMG14418|LMG14418_1042		43	FALSE
OG_1060	Exodeoxyribonuclease III (EC 3.1.11.2)	A76|A76_1776	UC509_9|UC5099_0843	FG2|FG2_2598	HP|HP_1254	LMG6897|LMG6897_1788	B40|B40_2199	SK11|SK11_0831	AM2|AM2_0866	SK110|SK110_1567	KW10|KW10_1095	KW2|KW2_0717	MG1363|MG1363_1833	NCDO763|NCDO763_1420	N41|N41_2232	V4|V4_0517	LMG8520|LMG8520_2433	IO_1|IO1_0762	LMG8526|LMG8526_2104	KF147|KF147_0839	KF282|KF282_1622	E34|E34_1109	KF201|KF201_0043	M20|M20_2172	ATCC19435|ATCC19435_2099	KF7|KF7_2157	LMG9449|LMG9449_0202	K231|K231_1249	K337|K337_0725	KF24|KF24_2338	Li1|Li1_1023	N42|N42_1988	ML8|ML8_1756	UC317|UC317_1694	KF67|KF67_1110	LMG9446|LMG9446_2214	KF146|KF146_2032	KF134|KF134_0801	KF196|KF196_0042	DRA4|DRA4_0957	IL1403|IL1403_0852	CV56|CV56_0814	KLDS|KLDS_0829	LMG14418|LMG14418_0790	P7266|P7266_0643	44	1
OG_1061	Arsenate reductase (EC 1.20.4.1)	A76|A76_1779	UC509_9|UC5099_0840	FG2|FG2_2454	HP|HP_1251	LMG6897|LMG6897_1785	B40|B40_2196	SK11|SK11_0828	AM2|AM2_0863	SK110|SK110_1564	KW10|KW10_1098	KW2|KW2_0714	MG1363|MG1363_1836	NCDO763|NCDO763_1417	N41|N41_2235	V4|V4_0514	LMG8520|LMG8520_2438	IO_1|IO1_0759	LMG8526|LMG8526_2101	KF147|KF147_0836	KF282|KF282_1619	E34|E34_1112	KF201|KF201_0040	M20|M20_2175	ATCC19435|ATCC19435_2096	KF7|KF7_2154	LMG9449|LMG9449_0205	K231|K231_1252	K337|K337_0728	KF24|KF24_2335	Li1|Li1_1026	N42|N42_1985	ML8|ML8_1759	UC317|UC317_1691	KF67|KF67_1107	LMG9446|LMG9446_2211	KF146|KF146_2029	KF134|KF134_0798	KF196|KF196_0039	DRA4|DRA4_0954	IL1403|IL1403_0849	CV56|CV56_0811	KLDS|KLDS_0826	LMG14418|LMG14418_0793	P7266|P7266_0644	44	1
OG_1062	Protein of unknown function DUF156	A76|A76_1780	UC509_9|UC5099_0839	FG2|FG2_2455	HP|HP_1250	LMG6897|LMG6897_1784	B40|B40_2195	SK11|SK11_0827	AM2|AM2_0862	SK110|SK110_1563	KW10|KW10_1099	KW2|KW2_0713	MG1363|MG1363_1837	NCDO763|NCDO763_1416	N41|N41_2236	V4|V4_0513	LMG8520|LMG8520_2439	IO_1|IO1_0758	LMG8526|LMG8526_2100	KF147|KF147_0835	KF282|KF282_1618	E34|E34_1113	KF201|KF201_0039	M20|M20_2176	ATCC19435|ATCC19435_2095	KF7|KF7_2153	LMG9449|LMG9449_0206	K231|K231_1253	K337|K337_0729	KF24|KF24_2334	Li1|Li1_1027	N42|N42_1984	ML8|ML8_1760	UC317|UC317_1690	KF67|KF67_1106	LMG9446|LMG9446_2210	KF146|KF146_2028	KF134|KF134_0797	KF196|KF196_0038	DRA4|DRA4_0953	IL1403|IL1403_0848	CV56|CV56_0810	KLDS|KLDS_0825	LMG14418|LMG14418_0794	P7266|P7266_1232	44	1
OG_1063	CoA-disulfide reductase (EC 1.8.1.14)	A76|A76_1781	UC509_9|UC5099_0838	FG2|FG2_2456	HP|HP_1249	LMG6897|LMG6897_1783	B40|B40_2194	SK11|SK11_0826	AM2|AM2_0861	SK110|SK110_1562	KW10|KW10_1100	KW2|KW2_0712	MG1363|MG1363_1838	NCDO763|NCDO763_1415	N41|N41_2237	V4|V4_0512	LMG8520|LMG8520_2440	IO_1|IO1_0757	LMG8526|LMG8526_2099	KF147|KF147_0834	KF282|KF282_1617	E34|E34_1114	KF201|KF201_0038	M20|M20_2177	ATCC19435|ATCC19435_2094	KF7|KF7_2152	LMG9449|LMG9449_0207	K231|K231_1254	K337|K337_0730	KF24|KF24_2333	Li1|Li1_1028	N42|N42_1983	ML8|ML8_1761	UC317|UC317_1689	KF67|KF67_1105	LMG9446|LMG9446_2209	KF146|KF146_2027	KF134|KF134_0796	KF196|KF196_0037	DRA4|DRA4_0952	IL1403|IL1403_0847	CV56|CV56_0808	KLDS|KLDS_0824	LMG14418|LMG14418_0795	P7266|P7266_1231	44	1
OG_1064	Rhodanese-like domain protein	A76|A76_1782	UC509_9|UC5099_0837	FG2|FG2_2457	HP|HP_1248	LMG6897|LMG6897_1782	B40|B40_2193	SK11|SK11_0825	AM2|AM2_0860	SK110|SK110_1561	KW10|KW10_1101	KW2|KW2_0711	MG1363|MG1363_1839	NCDO763|NCDO763_1414	N41|N41_2238	V4|V4_0511	LMG8520|LMG8520_2441	IO_1|IO1_0756	LMG8526|LMG8526_2098	KF147|KF147_0833	KF282|KF282_1616	E34|E34_1115	KF201|KF201_0037	M20|M20_2178	ATCC19435|ATCC19435_2093	KF7|KF7_2151	LMG9449|LMG9449_0208	K231|K231_1255	K337|K337_0731	KF24|KF24_2332	Li1|Li1_1029	N42|N42_1981	ML8|ML8_1762	UC317|UC317_1688	KF67|KF67_1104	LMG9446|LMG9446_2208	KF146|KF146_2026	KF134|KF134_0795	KF196|KF196_0036	DRA4|DRA4_0951	IL1403|IL1403_0846	CV56|CV56_0807	KLDS|KLDS_0823	LMG14418|LMG14418_0796	P7266|P7266_1230	44	1
OG_1065	Rhodanese-like domain protein	A76|A76_1783	UC509_9|UC5099_0836	FG2|FG2_2458	HP|HP_1247	LMG6897|LMG6897_1781	B40|B40_2192	SK11|SK11_0824	AM2|AM2_0859	SK110|SK110_1560	KW10|KW10_1102	KW2|KW2_0710	MG1363|MG1363_1840	NCDO763|NCDO763_1413	N41|N41_2239	V4|V4_0510	LMG8520|LMG8520_2442	IO_1|IO1_0755	LMG8526|LMG8526_2097	KF147|KF147_0832	KF282|KF282_1615	E34|E34_1116	KF201|KF201_0036	M20|M20_2179	ATCC19435|ATCC19435_2092	KF7|KF7_2150	LMG9449|LMG9449_0209	K231|K231_1256	K337|K337_0732	KF24|KF24_2331	Li1|Li1_1030	N42|N42_1980	ML8|ML8_1763	UC317|UC317_1687	KF67|KF67_1103	LMG9446|LMG9446_2207	KF146|KF146_2025	KF134|KF134_0794	KF196|KF196_0035	DRA4|DRA4_0950	IL1403|IL1403_0845	CV56|CV56_0806	KLDS|KLDS_0822	LMG14418|LMG14418_0797	P7266|P7266_1229	44	1
OG_1066	FIG00756296: hypothetical protein	A76|A76_1784	UC509_9|UC5099_0835	FG2|FG2_2459	HP|HP_1246	LMG6897|LMG6897_1780	B40|B40_2191	SK11|SK11_0823	AM2|AM2_0858	SK110|SK110_1559	KW10|KW10_1103	KW2|KW2_0709	MG1363|MG1363_1841	NCDO763|NCDO763_1412	N41|N41_2240	V4|V4_0509	LMG8520|LMG8520_2443	IO_1|IO1_0754	LMG8526|LMG8526_2096	KF147|KF147_0831	KF282|KF282_1614	E34|E34_1117	KF201|KF201_0035	M20|M20_2180	ATCC19435|ATCC19435_2091	KF7|KF7_2149	LMG9449|LMG9449_0210	K231|K231_1257	K337|K337_0733	KF24|KF24_2330	Li1|Li1_1031	N42|N42_1979	ML8|ML8_1764	UC317|UC317_1686	KF67|KF67_1102	LMG9446|LMG9446_2206	KF146|KF146_2024	KF134|KF134_0793	KF196|KF196_0034	DRA4|DRA4_0949	IL1403|IL1403_0844	CV56|CV56_0805	KLDS|KLDS_0821	LMG14418|LMG14418_0798	P7266|P7266_0645	44	1
OG_1067	Cysteine synthase (EC 2.5.1.47)	A76|A76_1785	UC509_9|UC5099_0834	FG2|FG2_2460	HP|HP_1245	LMG6897|LMG6897_1779	B40|B40_2190	SK11|SK11_0822	AM2|AM2_0857	SK110|SK110_1558	KW10|KW10_1104	KW2|KW2_0708	MG1363|MG1363_1842	NCDO763|NCDO763_1411	N41|N41_2241	V4|V4_0508	LMG8520|LMG8520_2444	IO_1|IO1_0753	LMG8526|LMG8526_2095	KF147|KF147_0830	KF282|KF282_1613	E34|E34_1118	KF201|KF201_0034	M20|M20_2181	ATCC19435|ATCC19435_2090	KF7|KF7_2148	LMG9449|LMG9449_0211	K231|K231_1258	K337|K337_0734	KF24|KF24_2329	Li1|Li1_1032	N42|N42_1978	ML8|ML8_1765	UC317|UC317_1685	KF67|KF67_1101	LMG9446|LMG9446_2205	KF146|KF146_2023	KF134|KF134_0792	KF196|KF196_0033	DRA4|DRA4_0948	IL1403|IL1403_0843	CV56|CV56_0804	KLDS|KLDS_0820	LMG14418|LMG14418_0799	P7266|P7266_0647	44	1
OG_1068	Cystathionine gamma-lyase (EC 4.4.1.1)	A76|A76_1786	UC509_9|UC5099_0833	FG2|FG2_2461	HP|HP_1244	LMG6897|LMG6897_1778	B40|B40_2189	SK11|SK11_0821	AM2|AM2_0856	SK110|SK110_1557	KW10|KW10_1106	KW2|KW2_0707	MG1363|MG1363_1843	NCDO763|NCDO763_1410	N41|N41_2242	V4|V4_0507	LMG8520|LMG8520_2445	IO_1|IO1_0752	LMG8526|LMG8526_2094	KF147|KF147_0829	KF282|KF282_1612	E34|E34_1119	KF201|KF201_0033	M20|M20_2182	ATCC19435|ATCC19435_2089	KF7|KF7_2147	LMG9449|LMG9449_0212	K231|K231_1259	K337|K337_0735	KF24|KF24_2328	Li1|Li1_1033	N42|N42_1977	ML8|ML8_1766	UC317|UC317_1684	KF67|KF67_1100	LMG9446|LMG9446_2204	KF146|KF146_2022	KF134|KF134_0791	KF196|KF196_0032	DRA4|DRA4_0947	IL1403|IL1403_0842	CV56|CV56_0803	KLDS|KLDS_0819	LMG14418|LMG14418_0800	P7266|P7266_0648	44	1
OG_1069	Acetyl-coenzyme A carboxyl transferase alphachain (EC 6.4.1.2)	A76|A76_1787	UC509_9|UC5099_0832	FG2|FG2_2462	HP|HP_1243	LMG6897|LMG6897_1777	B40|B40_2188	SK11|SK11_0820	AM2|AM2_0855	SK110|SK110_1556	KW10|KW10_1113	KW2|KW2_0706	MG1363|MG1363_1844	NCDO763|NCDO763_1409	N41|N41_2243	V4|V4_0506	LMG8520|LMG8520_2446	IO_1|IO1_0745	LMG8526|LMG8526_2093	KF147|KF147_0828	KF282|KF282_1611	E34|E34_1120	KF201|KF201_0032	M20|M20_2183	ATCC19435|ATCC19435_2088	KF7|KF7_2146	LMG9449|LMG9449_0213	K231|K231_1260	K337|K337_0736	KF24|KF24_2327	Li1|Li1_1034	N42|N42_1976	ML8|ML8_1767	UC317|UC317_1683	KF67|KF67_1099	LMG9446|LMG9446_2203	KF146|KF146_2021	KF134|KF134_0790	KF196|KF196_0031	DRA4|DRA4_0946	IL1403|IL1403_0841	CV56|CV56_0802	KLDS|KLDS_0818	LMG14418|LMG14418_0801	P7266|P7266_0649	44	1
OG_107	Acetyltransferase	A76|A76_2013	UC509_9|UC5099_0624	FG2|FG2_2290	HP|HP_2359	LMG6897|LMG6897_0318	B40|B40_1882 B40|B40_1881	SK11|SK11_0603	AM2|AM2_1730	SK110|SK110_2106	KW10|KW10_0835	KW2|KW2_0527	MG1363|MG1363_0579	NCDO763|NCDO763_1546	N41|N41_1646	V4|V4_1727	LMG8520|LMG8520_0791	IO_1|IO1_0511	LMG8526|LMG8526_0817	KF147|KF147_0598	KF282|KF282_1471	E34|E34_0855	KF201|KF201_1864	M20|M20_0814	ATCC19435|ATCC19435_0637	KF7|KF7_1845	LMG9449|LMG9449_2381	K231|K231_1794	K337|K337_1135	KF24|KF24_1971	Li1|Li1_0045	N42|N42_0049	ML8|ML8_2148	UC317|UC317_0424	KF67|KF67_2408	LMG9446|LMG9446_1900	KF146|KF146_1180	KF134|KF134_2172	KF196|KF196_2016	DRA4|DRA4_2143	IL1403|IL1403_0643	CV56|CV56_0560	KLDS|KLDS_0644	LMG14418|LMG14418_0122	P7266|P7266_0038	44	1
OG_1070	Acetyl-coenzyme A carboxyl transferase betachain (EC 6.4.1.2)	A76|A76_1788	UC509_9|UC5099_0831	FG2|FG2_2463	HP|HP_1242	LMG6897|LMG6897_1776	B40|B40_2187	SK11|SK11_0819	AM2|AM2_0854	SK110|SK110_1555	KW10|KW10_1114	KW2|KW2_0705	MG1363|MG1363_1845	NCDO763|NCDO763_1408	N41|N41_2244	V4|V4_0505	LMG8520|LMG8520_2447	IO_1|IO1_0744	LMG8526|LMG8526_2092	KF147|KF147_0827	KF282|KF282_1610	E34|E34_1121	KF201|KF201_0031	M20|M20_2184	ATCC19435|ATCC19435_2087	KF7|KF7_2145	LMG9449|LMG9449_0214	K231|K231_1261	K337|K337_0737	KF24|KF24_2326	Li1|Li1_1035	N42|N42_1975	ML8|ML8_1768	UC317|UC317_1682	KF67|KF67_1098	LMG9446|LMG9446_2202	KF146|KF146_2020	KF134|KF134_0789	KF196|KF196_0030	DRA4|DRA4_0945	IL1403|IL1403_0840	CV56|CV56_0801	KLDS|KLDS_0817	LMG14418|LMG14418_0802	P7266|P7266_0650	44	1
OG_1071	Biotin carboxylase of acetyl-CoA carboxylase(EC 6.3.4.14)	A76|A76_1789	UC509_9|UC5099_0830	FG2|FG2_2464	HP|HP_1241	LMG6897|LMG6897_1775	B40|B40_2186	SK11|SK11_0818	AM2|AM2_0853	SK110|SK110_1554	KW10|KW10_1115	KW2|KW2_0704	MG1363|MG1363_1846	NCDO763|NCDO763_1407	N41|N41_2245	V4|V4_0504	LMG8520|LMG8520_2448	IO_1|IO1_0743	LMG8526|LMG8526_2091	KF147|KF147_0826	KF282|KF282_1609	E34|E34_1122	KF201|KF201_0030	M20|M20_2185	ATCC19435|ATCC19435_2086	KF7|KF7_2144	LMG9449|LMG9449_0215	K231|K231_1262	K337|K337_0738	KF24|KF24_2325	Li1|Li1_1036	N42|N42_1974	ML8|ML8_1769	UC317|UC317_1681	KF67|KF67_1097	LMG9446|LMG9446_2201	KF146|KF146_2019	KF134|KF134_0788	KF196|KF196_0029	DRA4|DRA4_0944	IL1403|IL1403_0839	CV56|CV56_0800	KLDS|KLDS_0816	LMG14418|LMG14418_0803	P7266|P7266_0651	44	1
OG_1072	(3R)-hydroxymyristoyl-[acyl carrier protein]dehydratase (EC 4.2.1.-)	A76|A76_1790	UC509_9|UC5099_0829	FG2|FG2_2465	HP|HP_1240	LMG6897|LMG6897_1774	B40|B40_2185	SK11|SK11_0817	AM2|AM2_0851	SK110|SK110_1553	KW10|KW10_1116	KW2|KW2_0703	MG1363|MG1363_1848	NCDO763|NCDO763_1405	N41|N41_2247	V4|V4_0502	LMG8520|LMG8520_2450	IO_1|IO1_0741	LMG8526|LMG8526_2089	KF147|KF147_0824	KF282|KF282_1607	E34|E34_1124	KF201|KF201_0028	M20|M20_2187	ATCC19435|ATCC19435_2084	KF7|KF7_2142	LMG9449|LMG9449_0217	K231|K231_1264	K337|K337_0740	KF24|KF24_2324	Li1|Li1_1038	N42|N42_1972	ML8|ML8_1771	UC317|UC317_1679	KF67|KF67_1095	LMG9446|LMG9446_2200	KF146|KF146_2017	KF134|KF134_0786	KF196|KF196_0028	DRA4|DRA4_0943	IL1403|IL1403_0837	CV56|CV56_0798	KLDS|KLDS_0814	LMG14418|LMG14418_0805	P7266|P7266_0653	44	1
OG_1073	Biotin carboxyl carrier protein of acetyl-CoAcarboxylase	A76|A76_1791	UC509_9|UC5099_0828	FG2|FG2_2466	HP|HP_1239	LMG6897|LMG6897_1773	B40|B40_2184	SK11|SK11_0816	AM2|AM2_0850	SK110|SK110_1552	KW10|KW10_1117	KW2|KW2_0702	MG1363|MG1363_1849	NCDO763|NCDO763_1404	N41|N41_2248	V4|V4_0501	LMG8520|LMG8520_2451	IO_1|IO1_0740	LMG8526|LMG8526_2087	KF147|KF147_0823	KF282|KF282_1605	E34|E34_1125	KF201|KF201_0027	M20|M20_2188	ATCC19435|ATCC19435_2083	KF7|KF7_2141	LMG9449|LMG9449_0218	K231|K231_1265	K337|K337_0741	KF24|KF24_2323	Li1|Li1_1039	N42|N42_1971	ML8|ML8_1772	UC317|UC317_1678	KF67|KF67_1094	LMG9446|LMG9446_2199	KF146|KF146_2016	KF134|KF134_0785	KF196|KF196_0027	DRA4|DRA4_0942	IL1403|IL1403_0836	CV56|CV56_0797	KLDS|KLDS_0813	LMG14418|LMG14418_0806	P7266|P7266_0654	44	1
OG_1074	3-oxoacyl-[acyl-carrier-protein] synthase,KASII (EC 2.3.1.41)	A76|A76_1792	UC509_9|UC5099_0827	FG2|FG2_2467	HP|HP_1238	LMG6897|LMG6897_1772	B40|B40_2183	SK11|SK11_0815	AM2|AM2_0849	SK110|SK110_1551	KW10|KW10_1118	KW2|KW2_0701	MG1363|MG1363_1850	NCDO763|NCDO763_1403	N41|N41_2249	V4|V4_0500	LMG8520|LMG8520_2452	IO_1|IO1_0739	LMG8526|LMG8526_2086	KF147|KF147_0822	KF282|KF282_1604	E34|E34_1126	KF201|KF201_0026	M20|M20_2189	ATCC19435|ATCC19435_2082	KF7|KF7_2140	LMG9449|LMG9449_0219	K231|K231_1266	K337|K337_0742	KF24|KF24_2322	Li1|Li1_1040	N42|N42_1970	ML8|ML8_1773	UC317|UC317_1677	KF67|KF67_1093	LMG9446|LMG9446_2198	KF146|KF146_2015	KF134|KF134_0784	KF196|KF196_0026	DRA4|DRA4_0941	IL1403|IL1403_0835	CV56|CV56_0796	KLDS|KLDS_0812	LMG14418|LMG14418_0807	P7266|P7266_0655	44	1
OG_1075	3-oxoacyl-[acyl-carrier protein] reductase (EC1.1.1.100)	A76|A76_1793	UC509_9|UC5099_0826	FG2|FG2_2468	HP|HP_1237	LMG6897|LMG6897_1771	B40|B40_2182	SK11|SK11_0814	AM2|AM2_0848	SK110|SK110_1550	KW10|KW10_1119	KW2|KW2_0700	MG1363|MG1363_1851	NCDO763|NCDO763_1402	N41|N41_2250	V4|V4_0499	LMG8520|LMG8520_2453	IO_1|IO1_0738	LMG8526|LMG8526_2085	KF147|KF147_0821	KF282|KF282_1603	E34|E34_1127	KF201|KF201_0025	M20|M20_2190	ATCC19435|ATCC19435_2081	KF7|KF7_2139	LMG9449|LMG9449_0220	K231|K231_1267	K337|K337_0743	KF24|KF24_2321	Li1|Li1_1041	N42|N42_1969	ML8|ML8_1774	UC317|UC317_1676	KF67|KF67_1092	LMG9446|LMG9446_2197	KF146|KF146_2014	KF134|KF134_0783	KF196|KF196_0025	DRA4|DRA4_0940	IL1403|IL1403_0834	CV56|CV56_0795	KLDS|KLDS_0811	LMG14418|LMG14418_0808	P7266|P7266_0656	44	1
OG_1076	Malonyl CoA-acyl carrier protein transacylase(EC 2.3.1.39)	A76|A76_1794	UC509_9|UC5099_0825	FG2|FG2_2469	HP|HP_1236	LMG6897|LMG6897_1770	B40|B40_2181	SK11|SK11_0813	AM2|AM2_0847	SK110|SK110_1549	KW10|KW10_1120	KW2|KW2_0699	MG1363|MG1363_1852	NCDO763|NCDO763_1401	N41|N41_2251	V4|V4_0498	LMG8520|LMG8520_2454	IO_1|IO1_0737	LMG8526|LMG8526_2084	KF147|KF147_0820	KF282|KF282_1602	E34|E34_1128	KF201|KF201_0024	M20|M20_2191	ATCC19435|ATCC19435_2080	KF7|KF7_2138	LMG9449|LMG9449_0221	K231|K231_1268	K337|K337_0744	KF24|KF24_2320	Li1|Li1_1042	N42|N42_1968	ML8|ML8_1775	UC317|UC317_1675	KF67|KF67_1091	LMG9446|LMG9446_2196	KF146|KF146_2013	KF134|KF134_0782	KF196|KF196_0024	DRA4|DRA4_0939	IL1403|IL1403_0833	CV56|CV56_0794	KLDS|KLDS_0810	LMG14418|LMG14418_0809	P7266|P7266_0657	44	1
OG_1077	Acyl carrier protein	A76|A76_1795	UC509_9|UC5099_0824	FG2|FG2_2470	HP|HP_1235	LMG6897|LMG6897_1769	B40|B40_2180	SK11|SK11_0812	AM2|AM2_0846	SK110|SK110_1548	KW10|KW10_1121	KW2|KW2_0698	MG1363|MG1363_1853	NCDO763|NCDO763_1400	N41|N41_2252	V4|V4_0497	LMG8520|LMG8520_2455	IO_1|IO1_0736	LMG8526|LMG8526_2083	KF147|KF147_0819	KF282|KF282_1601	E34|E34_1129	KF201|KF201_0023	M20|M20_2192	ATCC19435|ATCC19435_2079	KF7|KF7_2137	LMG9449|LMG9449_0222	K231|K231_1269	K337|K337_0745	KF24|KF24_2319	Li1|Li1_1043	N42|N42_1967	ML8|ML8_1776	UC317|UC317_1674	KF67|KF67_1090	LMG9446|LMG9446_2195	KF146|KF146_2012	KF134|KF134_0781	KF196|KF196_0023	DRA4|DRA4_0938	IL1403|IL1403_0832	CV56|CV56_0793	KLDS|KLDS_0809	LMG14418|LMG14418_0810	P7266|P7266_0658	44	1
OG_1078	3-oxoacyl-[acyl-carrier-protein] synthase,KASIII (EC 2.3.1.41)	A76|A76_1796	UC509_9|UC5099_0823	FG2|FG2_2471	HP|HP_1234	LMG6897|LMG6897_1768	B40|B40_2179	SK11|SK11_0811	AM2|AM2_0845	SK110|SK110_1547	KW10|KW10_1122	KW2|KW2_0697	MG1363|MG1363_1854	NCDO763|NCDO763_1399	N41|N41_2253	V4|V4_0496	LMG8520|LMG8520_2456	IO_1|IO1_0735	LMG8526|LMG8526_2082	KF147|KF147_0818	KF282|KF282_1600	E34|E34_1130	KF201|KF201_0022	M20|M20_2193	ATCC19435|ATCC19435_2078	KF7|KF7_2136	LMG9449|LMG9449_0223	K231|K231_1270	K337|K337_0746	KF24|KF24_2318	Li1|Li1_1044	N42|N42_1966	ML8|ML8_1777	UC317|UC317_1673	KF67|KF67_1089	LMG9446|LMG9446_2194	KF146|KF146_2011	KF134|KF134_0780	KF196|KF196_0022	DRA4|DRA4_0937	IL1403|IL1403_0831	CV56|CV56_0792	KLDS|KLDS_0808	LMG14418|LMG14418_0811	P7266|P7266_0659	44	1
OG_1079	Transcriptional regulator of fatty acidbiosynthesis FabT	A76|A76_1797	UC509_9|UC5099_0822	FG2|FG2_2472	HP|HP_1233	LMG6897|LMG6897_1767	B40|B40_2178	SK11|SK11_0810	AM2|AM2_0844	SK110|SK110_1546	KW10|KW10_1123	KW2|KW2_0696	MG1363|MG1363_1855	NCDO763|NCDO763_1398	N41|N41_2254	V4|V4_0495	LMG8520|LMG8520_2457	IO_1|IO1_0734	LMG8526|LMG8526_2081	KF147|KF147_0817	KF282|KF282_1599	E34|E34_1131	KF201|KF201_0021	M20|M20_2194	ATCC19435|ATCC19435_2077	KF7|KF7_2135	LMG9449|LMG9449_0224	K231|K231_1271	K337|K337_0747	KF24|KF24_2317	Li1|Li1_1045	N42|N42_1965	ML8|ML8_1778	UC317|UC317_1672	KF67|KF67_1088	LMG9446|LMG9446_2193	KF146|KF146_2010	KF134|KF134_0779	KF196|KF196_0021	DRA4|DRA4_0936	IL1403|IL1403_0830	CV56|CV56_0791	KLDS|KLDS_0807	LMG14418|LMG14418_0812	P7266|P7266_0660	44	1
OG_108	FIG00755788: hypothetical protein	A76|A76_0991	UC509_9|UC5099_1555 UC509_9|UC5099_1558	FG2|FG2_1063 FG2|FG2_0418	HP|HP_1856	LMG6897|LMG6897_1353	B40|B40_2595	SK11|SK11_1641	AM2|AM2_2089	SK110|SK110_2434	KW10|KW10_2046	KW2|KW2_1481	MG1363|MG1363_1011 MG1363|MG1363_1010	NCDO763|NCDO763_1819 NCDO763|NCDO763_1818	N41|N41_2482 N41|N41_2481	V4|V4_0338	LMG8520|LMG8520_2573	IO_1|IO1_1519	LMG8526|LMG8526_1258	KF147|KF147_1697 KF147|KF147_1698	KF282|KF282_1839	E34|E34_0520	KF201|KF201_1967	M20|M20_1673	ATCC19435|ATCC19435_1960	KF7|KF7_0574	LMG9449|LMG9449_2291	K231|K231_1907	K337|K337_1942	KF24|KF24_1768	Li1|Li1_1716	N42|N42_0810	ML8|ML8_1471	UC317|UC317_1307	KF67|KF67_1001	LMG9446|LMG9446_1618	KF146|KF146_0761	KF134|KF134_0019	KF196|KF196_1126	DRA4|DRA4_2398	IL1403|IL1403_1649	CV56|CV56_1524	KLDS|KLDS_1642	LMG14418|LMG14418_1349	P7266|P7266_1967	44	1
OG_1080	Mannose-6-phosphate isomerase (EC 5.3.1.8)	A76|A76_1799	UC509_9|UC5099_0821	FG2|FG2_2473	HP|HP_1232	LMG6897|LMG6897_1766	B40|B40_2177	SK11|SK11_0809	AM2|AM2_0843	SK110|SK110_1545	KW10|KW10_1125	KW2|KW2_0695	MG1363|MG1363_1856	NCDO763|NCDO763_1397	N41|N41_2255	V4|V4_0494	LMG8520|LMG8520_2458	IO_1|IO1_0733	LMG8526|LMG8526_2080	KF147|KF147_0816	KF282|KF282_1598	E34|E34_1132	KF201|KF201_0020	M20|M20_2195	ATCC19435|ATCC19435_2076	KF7|KF7_2134	LMG9449|LMG9449_0225	K231|K231_1272	K337|K337_0748	KF24|KF24_2316	Li1|Li1_1046	N42|N42_1964	ML8|ML8_1779	UC317|UC317_1671	KF67|KF67_1087	LMG9446|LMG9446_2192	KF146|KF146_2009	KF134|KF134_0778	KF196|KF196_0020	DRA4|DRA4_0935	IL1403|IL1403_0829	CV56|CV56_0790	KLDS|KLDS_0806	LMG14418|LMG14418_0813	P7266|P7266_0661	44	1
OG_1081	Ribosome-binding factor A	A76|A76_1800	UC509_9|UC5099_0820	FG2|FG2_2474	HP|HP_1231	LMG6897|LMG6897_1765	B40|B40_2176	SK11|SK11_0808	AM2|AM2_0842	SK110|SK110_1544	KW10|KW10_1126	KW2|KW2_0694	MG1363|MG1363_1858	NCDO763|NCDO763_1395	N41|N41_2257	V4|V4_0493	LMG8520|LMG8520_2459	IO_1|IO1_0732	LMG8526|LMG8526_2079	KF147|KF147_0815	KF282|KF282_1597	E34|E34_1133	KF201|KF201_0019	M20|M20_2196	ATCC19435|ATCC19435_2075	KF7|KF7_2133	LMG9449|LMG9449_0226	K231|K231_1273	K337|K337_0749	KF24|KF24_2315	Li1|Li1_1047	N42|N42_1963	ML8|ML8_1780	UC317|UC317_1670	KF67|KF67_1086	LMG9446|LMG9446_2191	KF146|KF146_2008	KF134|KF134_0777	KF196|KF196_0019	DRA4|DRA4_0934	IL1403|IL1403_0828	CV56|CV56_0789	KLDS|KLDS_0805	LMG14418|LMG14418_0814	P7266|P7266_0663	44	1
OG_1082	Translation initiation factor 2	A76|A76_1801	UC509_9|UC5099_0819	FG2|FG2_2475	HP|HP_1230	LMG6897|LMG6897_1764	B40|B40_2175	SK11|SK11_0807	AM2|AM2_0841	SK110|SK110_1543	KW10|KW10_1127	KW2|KW2_0693	MG1363|MG1363_1859	NCDO763|NCDO763_1394	N41|N41_2258	V4|V4_0492	LMG8520|LMG8520_2460	IO_1|IO1_0731	LMG8526|LMG8526_2078	KF147|KF147_0814	KF282|KF282_1596	E34|E34_1134	KF201|KF201_0018	M20|M20_2197	ATCC19435|ATCC19435_2074	KF7|KF7_2132	LMG9449|LMG9449_0227	K231|K231_1274	K337|K337_0750	KF24|KF24_2314	Li1|Li1_1048	N42|N42_1962	ML8|ML8_1781	UC317|UC317_1669	KF67|KF67_1085	LMG9446|LMG9446_2190	KF146|KF146_2007	KF134|KF134_0776	KF196|KF196_0018	DRA4|DRA4_0933	IL1403|IL1403_0827	CV56|CV56_0788	KLDS|KLDS_0804	LMG14418|LMG14418_0815	P7266|P7266_0664	44	1
OG_1083	ribosomal protein L7Ae family protein	A76|A76_1802	UC509_9|UC5099_0818	FG2|FG2_2476	HP|HP_1229	LMG6897|LMG6897_1763	B40|B40_2174	SK11|SK11_0806	AM2|AM2_0840	SK110|SK110_1542	KW10|KW10_1128	KW2|KW2_0692	MG1363|MG1363_1860	NCDO763|NCDO763_1393	N41|N41_2259	V4|V4_0491	LMG8520|LMG8520_2461	IO_1|IO1_0730	LMG8526|LMG8526_2077	KF147|KF147_0813	KF282|KF282_1595	E34|E34_1135	KF201|KF201_0017	M20|M20_2198	ATCC19435|ATCC19435_2073	KF7|KF7_2131	LMG9449|LMG9449_0228	K231|K231_1275	K337|K337_0751	KF24|KF24_2313	Li1|Li1_1049	N42|N42_1961	ML8|ML8_1782	UC317|UC317_1668	KF67|KF67_1084	LMG9446|LMG9446_2189	KF146|KF146_2006	KF134|KF134_0775	KF196|KF196_0017	DRA4|DRA4_0932	IL1403|IL1403_0826	CV56|CV56_0787	KLDS|KLDS_0803	LMG14418|LMG14418_0816	P7266|P7266_0665	44	1
OG_1084	COG2740: Predicted nucleic-acid-binding proteinimplicated in transcription termination	A76|A76_1803	UC509_9|UC5099_0817	FG2|FG2_2477	HP|HP_1228	LMG6897|LMG6897_1762	B40|B40_2173	SK11|SK11_0805	AM2|AM2_0839	SK110|SK110_1541	KW10|KW10_1129	KW2|KW2_0691	MG1363|MG1363_1861	NCDO763|NCDO763_1392	N41|N41_2260	V4|V4_0490	LMG8520|LMG8520_2462	IO_1|IO1_0729	LMG8526|LMG8526_2076	KF147|KF147_0812	KF282|KF282_1594	E34|E34_1136	KF201|KF201_0016	M20|M20_2199	ATCC19435|ATCC19435_2072	KF7|KF7_2130	LMG9449|LMG9449_0229	K231|K231_1276	K337|K337_0752	KF24|KF24_2312	Li1|Li1_1050	N42|N42_1960	ML8|ML8_1783	UC317|UC317_1667	KF67|KF67_1083	LMG9446|LMG9446_2188	KF146|KF146_2005	KF134|KF134_0774	KF196|KF196_0016	DRA4|DRA4_0931	IL1403|IL1403_0825	CV56|CV56_0786	KLDS|KLDS_0802	LMG14418|LMG14418_0817	P7266|P7266_0666	44	1
OG_1085	Transcription termination protein NusA	A76|A76_1805	UC509_9|UC5099_0815	FG2|FG2_2479	HP|HP_1226	LMG6897|LMG6897_1760	B40|B40_2171	SK11|SK11_0803	AM2|AM2_0838	SK110|SK110_1539	KW10|KW10_1131	KW2|KW2_0689	MG1363|MG1363_1863	NCDO763|NCDO763_1390	N41|N41_2262	V4|V4_0488	LMG8520|LMG8520_2463	IO_1|IO1_0728	LMG8526|LMG8526_2075	KF147|KF147_0811	KF282|KF282_1593	E34|E34_1137	KF201|KF201_0014	M20|M20_2200	ATCC19435|ATCC19435_2071	KF7|KF7_2129	LMG9449|LMG9449_0230	K231|K231_1277	K337|K337_0753	KF24|KF24_2310	Li1|Li1_1051	N42|N42_1959	ML8|ML8_1784	UC317|UC317_1666	KF67|KF67_1082	LMG9446|LMG9446_2187	KF146|KF146_2004	KF134|KF134_0773	KF196|KF196_0015	DRA4|DRA4_0929	IL1403|IL1403_0824	CV56|CV56_0785	KLDS|KLDS_0801	LMG14418|LMG14418_0818	P7266|P7266_0667	44	1
OG_1086	FIG000325: clustered with transcriptiontermination protein NusA	A76|A76_1806	UC509_9|UC5099_0814	FG2|FG2_2480	HP|HP_1225	LMG6897|LMG6897_1759	B40|B40_2170	SK11|SK11_0802	AM2|AM2_0837	SK110|SK110_1538	KW10|KW10_1132	KW2|KW2_0688	MG1363|MG1363_1864	NCDO763|NCDO763_1389	N41|N41_2263	V4|V4_0487	LMG8520|LMG8520_2464	IO_1|IO1_0727	LMG8526|LMG8526_2074	KF147|KF147_0810	KF282|KF282_1592	E34|E34_1138	KF201|KF201_0013	M20|M20_2201	ATCC19435|ATCC19435_2070	KF7|KF7_2128	LMG9449|LMG9449_0231	K231|K231_1278	K337|K337_0754	KF24|KF24_2309	Li1|Li1_1052	N42|N42_1958	ML8|ML8_1785	UC317|UC317_1665	KF67|KF67_1081	LMG9446|LMG9446_2186	KF146|KF146_2003	KF134|KF134_0772	KF196|KF196_0014	DRA4|DRA4_0928	IL1403|IL1403_0823	CV56|CV56_0784	KLDS|KLDS_0800	LMG14418|LMG14418_0819	P7266|P7266_0668	44	1
OG_1087	Antiholin-like protein LrgA	A76|A76_1808	UC509_9|UC5099_0812	FG2|FG2_2482	HP|HP_1223	LMG6897|LMG6897_1757	B40|B40_2168	SK11|SK11_0800	AM2|AM2_0836	SK110|SK110_1536	KW10|KW10_1134	KW2|KW2_0686	MG1363|MG1363_1866	NCDO763|NCDO763_1387	N41|N41_2265	V4|V4_0485	LMG8520|LMG8520_2465	IO_1|IO1_0726	LMG8526|LMG8526_2073	KF147|KF147_0809	KF282|KF282_1591	E34|E34_1139	KF201|KF201_0012	M20|M20_2202	ATCC19435|ATCC19435_2069	KF7|KF7_2127	LMG9449|LMG9449_0232	K231|K231_1279	K337|K337_0755	KF24|KF24_2308	Li1|Li1_1053	N42|N42_1957	ML8|ML8_1786	UC317|UC317_1664	KF67|KF67_1080	LMG9446|LMG9446_2185	KF146|KF146_2002	KF134|KF134_0771	KF196|KF196_0013	DRA4|DRA4_0926	IL1403|IL1403_0822	CV56|CV56_0783	KLDS|KLDS_0799	LMG14418|LMG14418_0820	P7266|P7266_0669	44	1
OG_1088	LrgA-associated membrane protein LrgB	A76|A76_1809	UC509_9|UC5099_0811	FG2|FG2_2483	HP|HP_1222	LMG6897|LMG6897_1756	B40|B40_2167	SK11|SK11_0799	AM2|AM2_0835	SK110|SK110_1535	KW10|KW10_1135	KW2|KW2_0685	MG1363|MG1363_1867	NCDO763|NCDO763_1386	N41|N41_2266	V4|V4_0484	LMG8520|LMG8520_2466	IO_1|IO1_0725	LMG8526|LMG8526_2072	KF147|KF147_0808	KF282|KF282_1590	E34|E34_1140	KF201|KF201_0011	M20|M20_2203	ATCC19435|ATCC19435_2068	KF7|KF7_2126	LMG9449|LMG9449_0233	K231|K231_1280	K337|K337_0756	KF24|KF24_2307	Li1|Li1_1054	N42|N42_1956	ML8|ML8_1787	UC317|UC317_1663	KF67|KF67_1079	LMG9446|LMG9446_2184	KF146|KF146_2001	KF134|KF134_0770	KF196|KF196_0012	DRA4|DRA4_0925	IL1403|IL1403_0821	CV56|CV56_0782	KLDS|KLDS_0798	LMG14418|LMG14418_0821	P7266|P7266_0670	44	1
OG_1089	FIG00755055: hypothetical protein	A76|A76_1811	UC509_9|UC5099_0809	FG2|FG2_2485	HP|HP_1220	LMG6897|LMG6897_1754	B40|B40_2165	SK11|SK11_0797	AM2|AM2_0834	SK110|SK110_1533	KW10|KW10_1136	KW2|KW2_0684	MG1363|MG1363_1868	NCDO763|NCDO763_1385	N41|N41_2267	V4|V4_0483	LMG8520|LMG8520_2468	IO_1|IO1_0724	LMG8526|LMG8526_2071	KF147|KF147_0807	KF282|KF282_1589	E34|E34_1141	KF201|KF201_0010	M20|M20_2204	ATCC19435|ATCC19435_2067	KF7|KF7_2125	LMG9449|LMG9449_0234	K231|K231_1281	K337|K337_0757	KF24|KF24_2306	Li1|Li1_1055	N42|N42_1955	ML8|ML8_1788	UC317|UC317_1662	KF67|KF67_1078	LMG9446|LMG9446_2183	KF146|KF146_2000	KF134|KF134_0769	KF196|KF196_0011	DRA4|DRA4_0923	IL1403|IL1403_0820	CV56|CV56_0781	KLDS|KLDS_0797	LMG14418|LMG14418_0822	P7266|P7266_1611	44	1
OG_109	6-phospho-beta-glucosidase (EC 3.2.1.86)	A76|A76_0492	UC509_9|UC5099_0462	FG2|FG2_2018	HP|HP_2411	LMG6897|LMG6897_0842	B40|B40_0861	SK11|SK11_0469	AM2|AM2_1543	SK110|SK110_1805	KW10|KW10_1386	KW2|KW2_0413	MG1363|MG1363_0456 MG1363|MG1363_1508	NCDO763|NCDO763_0171 NCDO763|NCDO763_0924	N41|N41_0949 N41|N41_2538	V4|V4_1860 V4|V4_2087	LMG8520|LMG8520_1651	IO_1|IO1_0404	LMG8526|LMG8526_2232	KF147|KF147_0485	KF282|KF282_0642	E34|E34_1212	KF201|KF201_0351	M20|M20_1955	ATCC19435|ATCC19435_1135	KF7|KF7_0287	LMG9449|LMG9449_0973	K231|K231_1428	K337|K337_0559	KF24|KF24_1748	Li1|Li1_2152	N42|N42_0354	ML8|ML8_1255	UC317|UC317_1778	KF67|KF67_1649	LMG9446|LMG9446_0653	KF146|KF146_2190	KF134|KF134_0915	KF196|KF196_0332	DRA4|DRA4_1513	IL1403|IL1403_0458	CV56|CV56_0449	KLDS|KLDS_0507	LMG14418|LMG14418_0617	P7266|P7266_0386	44	1
OG_1090	Sortase A, LPXTG specific	A76|A76_1812	UC509_9|UC5099_0807	FG2|FG2_2487	HP|HP_1218	LMG6897|LMG6897_1752	B40|B40_2163	SK11|SK11_0795	AM2|AM2_0833	SK110|SK110_1531	KW10|KW10_1137	KW2|KW2_0683	MG1363|MG1363_1869	NCDO763|NCDO763_1384	N41|N41_2268	V4|V4_0482	LMG8520|LMG8520_2469	IO_1|IO1_0723	LMG8526|LMG8526_2070	KF147|KF147_0806	KF282|KF282_1588	E34|E34_1142	KF201|KF201_0009	M20|M20_2205	ATCC19435|ATCC19435_2066	KF7|KF7_2124	LMG9449|LMG9449_0235	K231|K231_1282	K337|K337_0758	KF24|KF24_2305	Li1|Li1_1056	N42|N42_1954	ML8|ML8_1789	UC317|UC317_1661	KF67|KF67_1077	LMG9446|LMG9446_2182	KF146|KF146_1999	KF134|KF134_0768	KF196|KF196_0010	DRA4|DRA4_0921	IL1403|IL1403_0819	CV56|CV56_0780	KLDS|KLDS_0796	LMG14418|LMG14418_0823	P7266|P7266_1612	44	1
OG_1091	GTP-binding protein EngA	A76|A76_1820	UC509_9|UC5099_0799	FG2|FG2_2051	HP|HP_0276	LMG6897|LMG6897_0233	B40|B40_0954	SK11|SK11_0787	AM2|AM2_0828	SK110|SK110_0462	KW10|KW10_1141	KW2|KW2_0679	MG1363|MG1363_1873	NCDO763|NCDO763_1380	N41|N41_2274	V4|V4_0478	LMG8520|LMG8520_2477	IO_1|IO1_0716	LMG8526|LMG8526_2062	KF147|KF147_0802	KF282|KF282_1583	E34|E34_1146	KF201|KF201_0005	M20|M20_2209	ATCC19435|ATCC19435_2061	KF7|KF7_2119	LMG9449|LMG9449_0239	K231|K231_1287	K337|K337_0762	KF24|KF24_2300	Li1|Li1_1061	N42|N42_1950	ML8|ML8_1794	UC317|UC317_1657	KF67|KF67_1073	LMG9446|LMG9446_2178	KF146|KF146_1993	KF134|KF134_0764	KF196|KF196_0005	DRA4|DRA4_0475	IL1403|IL1403_0815	CV56|CV56_0776	KLDS|KLDS_0792	LMG14418|LMG14418_1372	P7266|P7266_0676	44	1
OG_1092	Oxygen-insensitive NADPH nitroreductase (EC1.-.-.-)	A76|A76_1823	UC509_9|UC5099_0796	FG2|FG2_2048	HP|HP_0273	LMG6897|LMG6897_0236	B40|B40_0957	SK11|SK11_0784	AM2|AM2_0826	SK110|SK110_0465	KW10|KW10_1143	KW2|KW2_0677	MG1363|MG1363_1875	NCDO763|NCDO763_1378	N41|N41_2276	V4|V4_0476	LMG8520|LMG8520_2480	IO_1|IO1_0714	LMG8526|LMG8526_2060	KF147|KF147_0800	KF282|KF282_1581	E34|E34_1148	KF201|KF201_0003	M20|M20_2211	ATCC19435|ATCC19435_2059	KF7|KF7_2117	LMG9449|LMG9449_0241	K231|K231_1289	K337|K337_0764	KF24|KF24_2298	Li1|Li1_1063	N42|N42_1948	ML8|ML8_1796	UC317|UC317_1655	KF67|KF67_1071	LMG9446|LMG9446_2176	KF146|KF146_1991	KF134|KF134_0762	KF196|KF196_0003	DRA4|DRA4_0478	IL1403|IL1403_0813	CV56|CV56_0774	KLDS|KLDS_0790	LMG14418|LMG14418_1370	P7266|P7266_0679	44	1
OG_1093	Helicase loader DnaI	A76|A76_1824	UC509_9|UC5099_0795	FG2|FG2_2047	HP|HP_0272	LMG6897|LMG6897_0237	B40|B40_0958	SK11|SK11_0783	AM2|AM2_0825	SK110|SK110_0466	KW10|KW10_1144	KW2|KW2_0676	MG1363|MG1363_1876	NCDO763|NCDO763_1377	N41|N41_2277	V4|V4_0475	LMG8520|LMG8520_2482	IO_1|IO1_0713	LMG8526|LMG8526_2059	KF147|KF147_0799	KF282|KF282_1580	E34|E34_1149	KF201|KF201_0002	M20|M20_2212	ATCC19435|ATCC19435_2058	KF7|KF7_2116	LMG9449|LMG9449_0242	K231|K231_1290	K337|K337_0765	KF24|KF24_2297	Li1|Li1_1064	N42|N42_1947	ML8|ML8_1797	UC317|UC317_1654	KF67|KF67_1070	LMG9446|LMG9446_2175	KF146|KF146_1990	KF134|KF134_0761	KF196|KF196_0002	DRA4|DRA4_0479	IL1403|IL1403_0812	CV56|CV56_0773	KLDS|KLDS_0789	LMG14418|LMG14418_1369	P7266|P7266_0680	44	1
OG_1094	Helicase loader DnaB	A76|A76_1825	UC509_9|UC5099_0794	FG2|FG2_2046	HP|HP_0271	LMG6897|LMG6897_0238	B40|B40_0959	SK11|SK11_0782	AM2|AM2_0824	SK110|SK110_0467	KW10|KW10_1145	KW2|KW2_0675	MG1363|MG1363_1877	NCDO763|NCDO763_1376	N41|N41_2278	V4|V4_0474	LMG8520|LMG8520_2483	IO_1|IO1_0712	LMG8526|LMG8526_2058	KF147|KF147_0798	KF282|KF282_1579	E34|E34_1150	KF201|KF201_0001	M20|M20_2213	ATCC19435|ATCC19435_2057	KF7|KF7_2115	LMG9449|LMG9449_0243	K231|K231_1291	K337|K337_0766	KF24|KF24_2296	Li1|Li1_1065	N42|N42_1946	ML8|ML8_1798	UC317|UC317_1653	KF67|KF67_1069	LMG9446|LMG9446_2174	KF146|KF146_1989	KF134|KF134_0760	KF196|KF196_0001	DRA4|DRA4_0480	IL1403|IL1403_0811	CV56|CV56_0772	KLDS|KLDS_0788	LMG14418|LMG14418_1368	P7266|P7266_0681	44	1
OG_1095	Orotate phosphoribosyltransferase (EC2.4.2.10)	A76|A76_1163	UC509_9|UC5099_1117	FG2|FG2_0743	HP|HP_0853	LMG6897|LMG6897_0655	B40|B40_0258	SK11|SK11_1159	AM2|AM2_2045	SK110|SK110_0706	KW10|KW10_2106	KW2|KW2_0992	MG1363|MG1363_1561	NCDO763|NCDO763_0223	N41|N41_2483	V4|V4_2583	LMG8520|LMG8520_1453	IO_1|IO1_1013	LMG8526|LMG8526_0867	KF147|KF147_1137	KF282|KF282_2104	E34|E34_0006	KF201|KF201_1555	M20|M20_2216	ATCC19435|ATCC19435_2312	KF7|KF7_1574	LMG9449|LMG9449_2176	K231|K231_0501	K337|K337_1582	KF24|KF24_1579	Li1|Li1_0561	N42|N42_1100	ML8|ML8_0058	UC317|UC317_2249	KF67|KF67_0521	LMG9446|LMG9446_0273	KF146|KF146_1377	KF134|KF134_0222	KF196|KF196_0547	DRA4|DRA4_0396	IL1403|IL1403_1156	CV56|CV56_1113	KLDS|KLDS_1127	LMG14418|LMG14418_0643	P7266|P7266_0239	44	1
OG_1096	SWF/SNF family helicase	A76|A76_2359	UC509_9|UC5099_2119	FG2|FG2_0873	HP|HP_1051	LMG6897|LMG6897_2155	B40|B40_2513	SK11|SK11_2352	AM2|AM2_0151	SK110|SK110_0581	KW10|KW10_0452	KW2|KW2_2084	MG1363|MG1363_2396	NCDO763|NCDO763_2187	N41|N41_1364	V4|V4_1001	LMG8520|LMG8520_1011	IO_1|IO1_2117	LMG8526|LMG8526_0302	KF147|KF147_2290	KF282|KF282_0282	E34|E34_2027	KF201|KF201_0950	M20|M20_2252	ATCC19435|ATCC19435_1834	KF7|KF7_1345	LMG9449|LMG9449_2624	K231|K231_0329	K337|K337_1302	KF24|KF24_0279	Li1|Li1_0299	N42|N42_2386	ML8|ML8_1323	UC317|UC317_0612	KF67|KF67_0054	LMG9446|LMG9446_1383	KF146|KF146_0889	KF134|KF134_2006	KF196|KF196_1349	DRA4|DRA4_0612	IL1403|IL1403_2218	CV56|CV56_2144	KLDS|KLDS_2335	LMG14418|LMG14418_1958	P7266|P7266_1649	44	1
OG_1097	FIG00756332: hypothetical protein	A76|A76_2358	UC509_9|UC5099_2118	FG2|FG2_0872	HP|HP_1050	LMG6897|LMG6897_2156	B40|B40_2512	SK11|SK11_2351	AM2|AM2_0152	SK110|SK110_0580	KW10|KW10_0451	KW2|KW2_2083	MG1363|MG1363_2395	NCDO763|NCDO763_2188	N41|N41_1365	V4|V4_1000	LMG8520|LMG8520_1010	IO_1|IO1_2116	LMG8526|LMG8526_0301	KF147|KF147_2289	KF282|KF282_0281	E34|E34_2028	KF201|KF201_0951	M20|M20_2253	ATCC19435|ATCC19435_1835	KF7|KF7_1344	LMG9449|LMG9449_2625	K231|K231_0328	K337|K337_1301	KF24|KF24_0278	Li1|Li1_0298	N42|N42_2385	ML8|ML8_1324	UC317|UC317_0613	KF67|KF67_0053	LMG9446|LMG9446_1382	KF146|KF146_0888	KF134|KF134_2005	KF196|KF196_1348	DRA4|DRA4_0611	IL1403|IL1403_2217	CV56|CV56_2143	KLDS|KLDS_2334	LMG14418|LMG14418_1959	P7266|P7266_1648	44	1
OG_1098	UDP-N-acetylmuramate--alanine ligase (EC6.3.2.8)	A76|A76_2356	UC509_9|UC5099_2117	FG2|FG2_0870	HP|HP_1048	LMG6897|LMG6897_2158	B40|B40_2510	SK11|SK11_2349	AM2|AM2_0153	SK110|SK110_0578	KW10|KW10_0450	KW2|KW2_2081	MG1363|MG1363_2393	NCDO763|NCDO763_2190	N41|N41_1367	V4|V4_0999	LMG8520|LMG8520_1009	IO_1|IO1_2115	LMG8526|LMG8526_0300	KF147|KF147_2288	KF282|KF282_0280	E34|E34_2029	KF201|KF201_0952	M20|M20_2254	ATCC19435|ATCC19435_1836	KF7|KF7_1343	LMG9449|LMG9449_2626	K231|K231_0327	K337|K337_1300	KF24|KF24_0277	Li1|Li1_0297	N42|N42_2384	ML8|ML8_1325	UC317|UC317_0614	KF67|KF67_0052	LMG9446|LMG9446_1381	KF146|KF146_0887	KF134|KF134_2004	KF196|KF196_1347	DRA4|DRA4_0609	IL1403|IL1403_2216	CV56|CV56_2142	KLDS|KLDS_2333	LMG14418|LMG14418_1960	P7266|P7266_1647	44	1
OG_1099	Arginyl-tRNA synthetase (EC 6.1.1.19)	A76|A76_2354	UC509_9|UC5099_2115	FG2|FG2_0868	HP|HP_1046	LMG6897|LMG6897_2160	B40|B40_2508	SK11|SK11_2347	AM2|AM2_0155	SK110|SK110_0576	KW10|KW10_0448	KW2|KW2_2079	MG1363|MG1363_2391	NCDO763|NCDO763_2192	N41|N41_1369	V4|V4_0997	LMG8520|LMG8520_1007	IO_1|IO1_2112	LMG8526|LMG8526_0298	KF147|KF147_2286	KF282|KF282_0278	E34|E34_2031	KF201|KF201_0954	M20|M20_2256	ATCC19435|ATCC19435_1838	KF7|KF7_1341	LMG9449|LMG9449_2628	K231|K231_0325	K337|K337_1298	KF24|KF24_0275	Li1|Li1_0295	N42|N42_2382	ML8|ML8_1327	UC317|UC317_0616	KF67|KF67_0050	LMG9446|LMG9446_1379	KF146|KF146_0885	KF134|KF134_2002	KF196|KF196_1345	DRA4|DRA4_0607	IL1403|IL1403_2214	CV56|CV56_2140	KLDS|KLDS_2331	LMG14418|LMG14418_1962	P7266|P7266_1645	44	1
OG_11	Arginine/ornithine antiporter ArcD	A76|A76_2345 A76|A76_2351	UC509_9|UC5099_2107 UC509_9|UC5099_2111	FG2|FG2_1970 FG2|FG2_1976	HP|HP_2518 HP|HP_2524	LMG6897|LMG6897_2262 LMG6897|LMG6897_2268	B40|B40_2499 B40|B40_2505	SK11|SK11_2339 SK11|SK11_2343	AM2|AM2_0158 AM2|AM2_0162	SK110|SK110_0568 SK110|SK110_0572	KW10|KW10_0441 KW10|KW10_0445	KW2|KW2_2072 KW2|KW2_2076	MG1363|MG1363_2384 MG1363|MG1363_2388	NCDO763|NCDO763_2195 NCDO763|NCDO763_2199	N41|N41_1372 N41|N41_1376	V4|V4_0990 V4|V4_0994	LMG8520|LMG8520_1004	IO_1|IO1_2105 IO_1|IO1_2109	LMG8526|LMG8526_0291 LMG8526|LMG8526_0295	KF147|KF147_2279 KF147|KF147_2283	KF282|KF282_0270 KF282|KF282_0274	E34|E34_2034 E34|E34_2038	KF201|KF201_0957 KF201|KF201_0961	M20|M20_2259 M20|M20_2263	ATCC19435|ATCC19435_1841 ATCC19435|ATCC19435_1845	KF7|KF7_1334 KF7|KF7_1338	LMG9449|LMG9449_2631 LMG9449|LMG9449_2635	K231|K231_0318 K231|K231_0322	K337|K337_1291 K337|K337_1295	KF24|KF24_0268 KF24|KF24_0272	Li1|Li1_0288 Li1|Li1_0292	N42|N42_2375 N42|N42_2379	ML8|ML8_1330 ML8|ML8_1334	UC317|UC317_0619 UC317|UC317_0623	KF67|KF67_0043 KF67|KF67_0047	LMG9446|LMG9446_1372 LMG9446|LMG9446_1376	KF146|KF146_0878 KF146|KF146_0882	KF134|KF134_1995 KF134|KF134_1999	KF196|KF196_1338 KF196|KF196_1342	DRA4|DRA4_0599 DRA4|DRA4_0603	IL1403|IL1403_2206 IL1403|IL1403_2211	CV56|CV56_2133 CV56|CV56_2137	KLDS|KLDS_2322 KLDS|KLDS_2326	LMG14418|LMG14418_0113 LMG14418|LMG14418_1992	P7266|P7266_1638 P7266|P7266_1642	44	1
OG_110	Oleate hydratase (EC 4.2.1.53)		UC509_9|UC5099_1049	FG2|FG2_2389	HP|HP_0401	LMG6897|LMG6897_1738	B40|B40_2589	SK11|SK11_1029	AM2|AM2_2328	SK110|SK110_0419	KW10|KW10_0596	KW2|KW2_0932	MG1363|MG1363_1630	NCDO763|NCDO763_0447	N41|N41_1730	V4|V4_1098	LMG8520|LMG8520_1392	IO_1|IO1_0947	LMG8526|LMG8526_0935	KF147|KF147_1019 KF147|KF147_2624	KF282|KF282_0945 KF282|KF282_2171	E34|E34_1880	KF201|KF201_1611	M20|M20_1844	ATCC19435|ATCC19435_1430	KF7|KF7_1518	LMG9449|LMG9449_0763 LMG9449|LMG9449_2102	K231|K231_0554	K337|K337_1641	KF24|KF24_1519 KF24|KF24_1809	Li1|Li1_0506	N42|N42_1042	ML8|ML8_1043	UC317|UC317_2041	KF67|KF67_0576	LMG9446|LMG9446_0217	KF146|KF146_1321	KF134|KF134_0277	KF196|KF196_0491	DRA4|DRA4_0432	IL1403|IL1403_1031	CV56|CV56_0990	KLDS|KLDS_1061	LMG14418|LMG14418_2286	P7266|P7266_0184 P7266|P7266_0546	43	FALSE
OG_1100	Arginine deiminase (EC 3.5.3.6)	A76|A76_2353	UC509_9|UC5099_2113	FG2|FG2_0867	HP|HP_1045	LMG6897|LMG6897_2161	B40|B40_2507	SK11|SK11_2346	AM2|AM2_0156	SK110|SK110_0575	KW10|KW10_0447	KW2|KW2_2078	MG1363|MG1363_2390	NCDO763|NCDO763_2193	N41|N41_1370	V4|V4_0996	LMG8520|LMG8520_1006	IO_1|IO1_2111	LMG8526|LMG8526_0297	KF147|KF147_2285	KF282|KF282_0277	E34|E34_2032	KF201|KF201_0955	M20|M20_2257	ATCC19435|ATCC19435_1839	KF7|KF7_1340	LMG9449|LMG9449_2629	K231|K231_0324	K337|K337_1297	KF24|KF24_0274	Li1|Li1_0294	N42|N42_2381	ML8|ML8_1328	UC317|UC317_0617	KF67|KF67_0049	LMG9446|LMG9446_1378	KF146|KF146_0884	KF134|KF134_2001	KF196|KF196_1344	DRA4|DRA4_0606	IL1403|IL1403_2213	CV56|CV56_2139	KLDS|KLDS_2330	LMG14418|LMG14418_1963	P7266|P7266_1644	44	1
OG_1101	Ornithine carbamoyltransferase (EC 2.1.3.3)	A76|A76_2352	UC509_9|UC5099_2112	FG2|FG2_1977	HP|HP_2525	LMG6897|LMG6897_2269	B40|B40_2506	SK11|SK11_2344	AM2|AM2_0157	SK110|SK110_0573	KW10|KW10_0446	KW2|KW2_2077	MG1363|MG1363_2389	NCDO763|NCDO763_2194	N41|N41_1371	V4|V4_0995	LMG8520|LMG8520_1005	IO_1|IO1_2110	LMG8526|LMG8526_0296	KF147|KF147_2284	KF282|KF282_0276	E34|E34_2033	KF201|KF201_0956	M20|M20_2258	ATCC19435|ATCC19435_1840	KF7|KF7_1339	LMG9449|LMG9449_2630	K231|K231_0323	K337|K337_1296	KF24|KF24_0273	Li1|Li1_0293	N42|N42_2380	ML8|ML8_1329	UC317|UC317_0618	KF67|KF67_0048	LMG9446|LMG9446_1377	KF146|KF146_0883	KF134|KF134_2000	KF196|KF196_1343	DRA4|DRA4_0604	IL1403|IL1403_2212	CV56|CV56_2138	KLDS|KLDS_2327	LMG14418|LMG14418_1993	P7266|P7266_1643	44	1
OG_1102	FIG042921: similarity to aminoacyl-tRNA editingenzymes YbaK, ProX	A76|A76_2344	UC509_9|UC5099_2106	FG2|FG2_1969	HP|HP_2517	LMG6897|LMG6897_2261	B40|B40_2498	SK11|SK11_2338	AM2|AM2_0163	SK110|SK110_0567	KW10|KW10_0440	KW2|KW2_2071	MG1363|MG1363_2383	NCDO763|NCDO763_2200	N41|N41_1377	V4|V4_0989	LMG8520|LMG8520_0996	IO_1|IO1_2104	LMG8526|LMG8526_0290	KF147|KF147_2278	KF282|KF282_0269	E34|E34_2039	KF201|KF201_0962	M20|M20_2264	ATCC19435|ATCC19435_1846	KF7|KF7_1333	LMG9449|LMG9449_2636	K231|K231_0317	K337|K337_1290	KF24|KF24_0267	Li1|Li1_0287	N42|N42_2374	ML8|ML8_1335	UC317|UC317_0624	KF67|KF67_0042	LMG9446|LMG9446_1371	KF146|KF146_0877	KF134|KF134_1994	KF196|KF196_1337	DRA4|DRA4_0598	IL1403|IL1403_2205	CV56|CV56_2132	KLDS|KLDS_2321	LMG14418|LMG14418_0112	P7266|P7266_1637	44	1
OG_1103	DNA polymerase IV (EC 2.7.7.7)	A76|A76_2343	UC509_9|UC5099_2105	FG2|FG2_1968	HP|HP_2516	LMG6897|LMG6897_2260	B40|B40_2497	SK11|SK11_2337	AM2|AM2_0164	SK110|SK110_0566	KW10|KW10_0439	KW2|KW2_2070	MG1363|MG1363_2382	NCDO763|NCDO763_2201	N41|N41_1378	V4|V4_0988	LMG8520|LMG8520_0995	IO_1|IO1_2103	LMG8526|LMG8526_0289	KF147|KF147_2277	KF282|KF282_0268	E34|E34_2040	KF201|KF201_0963	M20|M20_2265	ATCC19435|ATCC19435_1847	KF7|KF7_1332	LMG9449|LMG9449_2637	K231|K231_0316	K337|K337_1289	KF24|KF24_0266	Li1|Li1_0286	N42|N42_2373	ML8|ML8_1336	UC317|UC317_0625	KF67|KF67_0041	LMG9446|LMG9446_1370	KF146|KF146_0876	KF134|KF134_1993	KF196|KF196_1336	DRA4|DRA4_0597	IL1403|IL1403_2204	CV56|CV56_2131	KLDS|KLDS_2320	LMG14418|LMG14418_0111	P7266|P7266_1636	44	1
OG_1104	Non-specific DNA-binding protein Dps /Iron-binding ferritin-like antioxidant protein /Ferroxidase (EC 1.16.3.1)	A76|A76_2340	UC509_9|UC5099_2102	FG2|FG2_1965	HP|HP_2513	LMG6897|LMG6897_2258	B40|B40_2495	SK11|SK11_2334	AM2|AM2_0166	SK110|SK110_1914	KW10|KW10_0437	KW2|KW2_2067	MG1363|MG1363_2379	NCDO763|NCDO763_2203	N41|N41_1380	V4|V4_0985	LMG8520|LMG8520_0993	IO_1|IO1_2101	LMG8526|LMG8526_0287	KF147|KF147_2275	KF282|KF282_0266	E34|E34_2042	KF201|KF201_0965	M20|M20_2267	ATCC19435|ATCC19435_1849	KF7|KF7_1330	LMG9449|LMG9449_2639	K231|K231_0314	K337|K337_1287	KF24|KF24_0264	Li1|Li1_0284	N42|N42_2371	ML8|ML8_1338	UC317|UC317_1533	KF67|KF67_0039	LMG9446|LMG9446_1368	KF146|KF146_0874	KF134|KF134_1991	KF196|KF196_1334	DRA4|DRA4_0686	IL1403|IL1403_2200	CV56|CV56_2129	KLDS|KLDS_2318	LMG14418|LMG14418_0383	P7266|P7266_1635	44	1
OG_1105	Rhodanese-like domain protein	A76|A76_2339	UC509_9|UC5099_2101	FG2|FG2_1964	HP|HP_2512	LMG6897|LMG6897_2257	B40|B40_2494	SK11|SK11_2333	AM2|AM2_0167	SK110|SK110_1915	KW10|KW10_0436	KW2|KW2_2066	MG1363|MG1363_2378	NCDO763|NCDO763_2204	N41|N41_1381	V4|V4_0984	LMG8520|LMG8520_0992	IO_1|IO1_2100	LMG8526|LMG8526_0286	KF147|KF147_2274	KF282|KF282_0265	E34|E34_2043	KF201|KF201_0966	M20|M20_2268	ATCC19435|ATCC19435_1850	KF7|KF7_1329	LMG9449|LMG9449_2640	K231|K231_0313	K337|K337_1286	KF24|KF24_0263	Li1|Li1_0283	N42|N42_2370	ML8|ML8_1339	UC317|UC317_1532	KF67|KF67_0038	LMG9446|LMG9446_1367	KF146|KF146_0873	KF134|KF134_1990	KF196|KF196_1333	DRA4|DRA4_0685	IL1403|IL1403_2199	CV56|CV56_2128	KLDS|KLDS_2317	LMG14418|LMG14418_0384	P7266|P7266_1634	44	1
OG_1106	Glucokinase (EC 2.7.1.2)	A76|A76_2338	UC509_9|UC5099_2100	FG2|FG2_1963	HP|HP_2511	LMG6897|LMG6897_2256	B40|B40_2493	SK11|SK11_2332	AM2|AM2_0168	SK110|SK110_1916	KW10|KW10_0435	KW2|KW2_2065	MG1363|MG1363_2377	NCDO763|NCDO763_2205	N41|N41_1382	V4|V4_0983	LMG8520|LMG8520_0991	IO_1|IO1_2099	LMG8526|LMG8526_0285	KF147|KF147_2273	KF282|KF282_0264	E34|E34_2044	KF201|KF201_0967	M20|M20_2269	ATCC19435|ATCC19435_1851	KF7|KF7_1328	LMG9449|LMG9449_2641	K231|K231_0312	K337|K337_1285	KF24|KF24_0262	Li1|Li1_0282	N42|N42_2369	ML8|ML8_1340	UC317|UC317_1531	KF67|KF67_0037	LMG9446|LMG9446_1366	KF146|KF146_0872	KF134|KF134_1989	KF196|KF196_1332	DRA4|DRA4_0684	IL1403|IL1403_2198	CV56|CV56_2127	KLDS|KLDS_2316	LMG14418|LMG14418_0385	P7266|P7266_1633	44	1
OG_1107	FIG00755125: hypothetical protein	A76|A76_2337	UC509_9|UC5099_2099	FG2|FG2_1962	HP|HP_2510	LMG6897|LMG6897_2255	B40|B40_2492	SK11|SK11_2331	AM2|AM2_0169	SK110|SK110_1917	KW10|KW10_0434	KW2|KW2_2064	MG1363|MG1363_2376	NCDO763|NCDO763_2206	N41|N41_1383	V4|V4_0982	LMG8520|LMG8520_0990	IO_1|IO1_2098	LMG8526|LMG8526_0284	KF147|KF147_2272	KF282|KF282_0263	E34|E34_2045	KF201|KF201_0968	M20|M20_2270	ATCC19435|ATCC19435_1852	KF7|KF7_1327	LMG9449|LMG9449_2642	K231|K231_0311	K337|K337_1284	KF24|KF24_0261	Li1|Li1_0281	N42|N42_2368	ML8|ML8_1341	UC317|UC317_1530	KF67|KF67_0036	LMG9446|LMG9446_1365	KF146|KF146_0871	KF134|KF134_1988	KF196|KF196_1331	DRA4|DRA4_0683	IL1403|IL1403_2197	CV56|CV56_2126	KLDS|KLDS_2315	LMG14418|LMG14418_0386	P7266|P7266_1632	44	1
OG_1108	Uridylate kinase (EC 2.7.4.-)	A76|A76_2322	UC509_9|UC5099_2082	FG2|FG2_1238	HP|HP_1173	LMG6897|LMG6897_2500	B40|B40_1921	SK11|SK11_2313	AM2|AM2_0183	SK110|SK110_0145	KW10|KW10_0419	KW2|KW2_2051	MG1363|MG1363_2362	NCDO763|NCDO763_2220	N41|N41_1398	V4|V4_0968	LMG8520|LMG8520_0089	IO_1|IO1_2084	LMG8526|LMG8526_0270	KF147|KF147_2258	KF282|KF282_0250	E34|E34_2057	KF201|KF201_0984	M20|M20_2285	ATCC19435|ATCC19435_1866	KF7|KF7_1315	LMG9449|LMG9449_2657	K231|K231_0298	K337|K337_1271	KF24|KF24_0247	Li1|Li1_0268	N42|N42_2354	ML8|ML8_1355	UC317|UC317_1516	KF67|KF67_0023	LMG9446|LMG9446_1353	KF146|KF146_0858	KF134|KF134_1975	KF196|KF196_1318	DRA4|DRA4_0203	IL1403|IL1403_2184	CV56|CV56_2110	KLDS|KLDS_2301	LMG14418|LMG14418_0399	P7266|P7266_1622	44	1
OG_1109	Ribosome recycling factor	A76|A76_2321	UC509_9|UC5099_2081	FG2|FG2_1237	HP|HP_1172	LMG6897|LMG6897_2499	B40|B40_1920	SK11|SK11_2312	AM2|AM2_0185	SK110|SK110_0146	KW10|KW10_0418	KW2|KW2_2050	MG1363|MG1363_2361	NCDO763|NCDO763_2221	N41|N41_1399	V4|V4_0967	LMG8520|LMG8520_0087	IO_1|IO1_2083	LMG8526|LMG8526_0268	KF147|KF147_2256	KF282|KF282_0248	E34|E34_2059	KF201|KF201_0986	M20|M20_2287	ATCC19435|ATCC19435_1868	KF7|KF7_1313	LMG9449|LMG9449_2659	K231|K231_0296	K337|K337_1269	KF24|KF24_0246	Li1|Li1_0266	N42|N42_2352	ML8|ML8_1357	UC317|UC317_1514	KF67|KF67_0021	LMG9446|LMG9446_1351	KF146|KF146_0856	KF134|KF134_1973	KF196|KF196_1316	DRA4|DRA4_0202	IL1403|IL1403_2182	CV56|CV56_2108	KLDS|KLDS_2299	LMG14418|LMG14418_0401	P7266|P7266_1620	44	1
OG_111	2-dehydropantoate 2-reductase (EC 1.1.1.169)	A76|A76_1458	UC509_9|UC5099_1405 UC509_9|UC5099_2413	FG2|FG2_1678 FG2|FG2_2101	HP|HP_1465	LMG6897|LMG6897_2249	B40|B40_1750	SK11|SK11_1464	AM2|AM2_1281	SK110|SK110_0801	KW10|KW10_0570	KW2|KW2_1298	MG1363|MG1363_1175	NCDO763|NCDO763_1278	N41|N41_0448 N41|N41_2088	V4|V4_0647	LMG8520|LMG8520_0314	IO_1|IO1_1357	LMG8526|LMG8526_0717	KF147|KF147_1460	KF282|KF282_0002	E34|E34_0763	KF201|KF201_0749	M20|M20_0852	ATCC19435|ATCC19435_0328	KF7|KF7_0423	LMG9449|LMG9449_1953	K231|K231_0720	K337|K337_1812	KF24|KF24_2127	Li1|Li1_1149	N42|N42_1569	ML8|ML8_0295 ML8|ML8_2548	UC317|UC317_0335	KF67|KF67_1970	LMG9446|LMG9446_0022	KF146|KF146_0514	KF134|KF134_1629	KF196|KF196_0874	DRA4|DRA4_0847	IL1403|IL1403_1438	CV56|CV56_1372	KLDS|KLDS_1485	LMG14418|LMG14418_0283	P7266|P7266_1413	44	1
OG_1110	S1 RNA binding domain	A76|A76_2319	UC509_9|UC5099_2079	FG2|FG2_1235	HP|HP_1170	LMG6897|LMG6897_2497	B40|B40_1918	SK11|SK11_2310	AM2|AM2_0187	SK110|SK110_0148	KW10|KW10_0416	KW2|KW2_2048	MG1363|MG1363_2359	NCDO763|NCDO763_2223	N41|N41_1401	V4|V4_0965	LMG8520|LMG8520_0085	IO_1|IO1_2081	LMG8526|LMG8526_0266	KF147|KF147_2254	KF282|KF282_0246	E34|E34_2061	KF201|KF201_0988	M20|M20_2289	ATCC19435|ATCC19435_1870	KF7|KF7_1311	LMG9449|LMG9449_2661	K231|K231_0294	K337|K337_1267	KF24|KF24_0244	Li1|Li1_0264	N42|N42_2350	ML8|ML8_1359	UC317|UC317_1512	KF67|KF67_0019	LMG9446|LMG9446_1349	KF146|KF146_0854	KF134|KF134_1971	KF196|KF196_1314	DRA4|DRA4_0200	IL1403|IL1403_2180	CV56|CV56_2106	KLDS|KLDS_2297	LMG14418|LMG14418_0403	P7266|P7266_1619	44	1
OG_1111	Peptide methionine sulfoxide reductase MsrA (EC1.8.4.11)	A76|A76_2318	UC509_9|UC5099_2078	FG2|FG2_1234	HP|HP_1169	LMG6897|LMG6897_2496	B40|B40_1917	SK11|SK11_2309	AM2|AM2_0188	SK110|SK110_0149	KW10|KW10_0415	KW2|KW2_2047	MG1363|MG1363_2358	NCDO763|NCDO763_2224	N41|N41_1402	V4|V4_0964	LMG8520|LMG8520_0084	IO_1|IO1_2080	LMG8526|LMG8526_0265	KF147|KF147_2253	KF282|KF282_0245	E34|E34_2062	KF201|KF201_0989	M20|M20_2290	ATCC19435|ATCC19435_1871	KF7|KF7_1310	LMG9449|LMG9449_2662	K231|K231_0293	K337|K337_1266	KF24|KF24_0243	Li1|Li1_0263	N42|N42_2349	ML8|ML8_1360	UC317|UC317_1511	KF67|KF67_0018	LMG9446|LMG9446_1348	KF146|KF146_0853	KF134|KF134_1970	KF196|KF196_1313	DRA4|DRA4_0199	IL1403|IL1403_2179	CV56|CV56_2105	KLDS|KLDS_2296	LMG14418|LMG14418_0404	P7266|P7266_1618	44	1
OG_1112	YOZE protein	A76|A76_2317	UC509_9|UC5099_2077	FG2|FG2_1233	HP|HP_1168	LMG6897|LMG6897_2495	B40|B40_1916	SK11|SK11_2308	AM2|AM2_0189	SK110|SK110_0150	KW10|KW10_0414	KW2|KW2_2046	MG1363|MG1363_2357	NCDO763|NCDO763_2225	N41|N41_1403	V4|V4_0963	LMG8520|LMG8520_0083	IO_1|IO1_2079	LMG8526|LMG8526_0264	KF147|KF147_2252	KF282|KF282_0244	E34|E34_2063	KF201|KF201_0990	M20|M20_2291	ATCC19435|ATCC19435_1872	KF7|KF7_1309	LMG9449|LMG9449_2663	K231|K231_0292	K337|K337_1265	KF24|KF24_0242	Li1|Li1_0262	N42|N42_2348	ML8|ML8_1361	UC317|UC317_1510	KF67|KF67_0017	LMG9446|LMG9446_1347	KF146|KF146_0852	KF134|KF134_1969	KF196|KF196_1312	DRA4|DRA4_0198	IL1403|IL1403_2178	CV56|CV56_2104	KLDS|KLDS_2295	LMG14418|LMG14418_0405	P7266|P7266_1617	44	1
OG_1113	LSU ribosomal protein L11p (L12e)	A76|A76_2313	UC509_9|UC5099_2074	FG2|FG2_1230	HP|HP_1165	LMG6897|LMG6897_2492	B40|B40_1913	SK11|SK11_2305	AM2|AM2_0192	SK110|SK110_0153	KW10|KW10_0411	KW2|KW2_2043	MG1363|MG1363_2354	NCDO763|NCDO763_2228	N41|N41_1406	V4|V4_0960	LMG8520|LMG8520_0080	IO_1|IO1_2076	LMG8526|LMG8526_0261	KF147|KF147_2249	KF282|KF282_0241	E34|E34_2066	KF201|KF201_0993	M20|M20_2294	ATCC19435|ATCC19435_1875	KF7|KF7_1306	LMG9449|LMG9449_2666	K231|K231_0289	K337|K337_1262	KF24|KF24_0239	Li1|Li1_0259	N42|N42_2345	ML8|ML8_1364	UC317|UC317_1507	KF67|KF67_0014	LMG9446|LMG9446_1344	KF146|KF146_0849	KF134|KF134_1966	KF196|KF196_1309	DRA4|DRA4_0195	IL1403|IL1403_2174	CV56|CV56_2101	KLDS|KLDS_2292	LMG14418|LMG14418_0408	P7266|P7266_1616	44	1
OG_1114	LSU ribosomal protein L1p (L10Ae)	A76|A76_2312	UC509_9|UC5099_2073	FG2|FG2_1229	HP|HP_1164	LMG6897|LMG6897_2491	B40|B40_1912	SK11|SK11_2304	AM2|AM2_0193	SK110|SK110_0154	KW10|KW10_0410	KW2|KW2_2042	MG1363|MG1363_2353	NCDO763|NCDO763_2229	N41|N41_1407	V4|V4_0959	LMG8520|LMG8520_0079	IO_1|IO1_2075	LMG8526|LMG8526_0260	KF147|KF147_2248	KF282|KF282_0240	E34|E34_2067	KF201|KF201_0994	M20|M20_2295	ATCC19435|ATCC19435_1876	KF7|KF7_1305	LMG9449|LMG9449_2667	K231|K231_0288	K337|K337_1261	KF24|KF24_0238	Li1|Li1_0258	N42|N42_2344	ML8|ML8_1365	UC317|UC317_1506	KF67|KF67_0013	LMG9446|LMG9446_1343	KF146|KF146_0848	KF134|KF134_1965	KF196|KF196_1308	DRA4|DRA4_0194	IL1403|IL1403_2173	CV56|CV56_2100	KLDS|KLDS_2291	LMG14418|LMG14418_0409	P7266|P7266_1615	44	1
OG_1115	Hypothetical protein in cluster with Ecstransporter (in Lactococci)	A76|A76_2310	UC509_9|UC5099_2071	FG2|FG2_1930	HP|HP_0120	LMG6897|LMG6897_0120	B40|B40_1910	SK11|SK11_2302	AM2|AM2_0195	SK110|SK110_0156	KW10|KW10_0408	KW2|KW2_2040	MG1363|MG1363_2351	NCDO763|NCDO763_2231	N41|N41_1409	V4|V4_0957	LMG8520|LMG8520_0078	IO_1|IO1_2073	LMG8526|LMG8526_0258	KF147|KF147_2246	KF282|KF282_0238	E34|E34_2068	KF201|KF201_0996	M20|M20_2297	ATCC19435|ATCC19435_1878	KF7|KF7_1303	LMG9449|LMG9449_2669	K231|K231_0286	K337|K337_1259	KF24|KF24_0236	Li1|Li1_0256	N42|N42_2342	ML8|ML8_1367	UC317|UC317_1504	KF67|KF67_0011	LMG9446|LMG9446_1341	KF146|KF146_0846	KF134|KF134_1963	KF196|KF196_1306	DRA4|DRA4_0192	IL1403|IL1403_2171	CV56|CV56_2098	KLDS|KLDS_2288	LMG14418|LMG14418_1902	P7266|P7266_1609	44	1
OG_1116	Histidine triad (HIT) nucleotide-bindingprotein, similarity with At5g48545 and yeast YDL125C(HNT1)	A76|A76_2309	UC509_9|UC5099_2070	FG2|FG2_1929	HP|HP_0119	LMG6897|LMG6897_0119	B40|B40_1909	SK11|SK11_2301	AM2|AM2_0196	SK110|SK110_0157	KW10|KW10_0407	KW2|KW2_2039	MG1363|MG1363_2350	NCDO763|NCDO763_2232	N41|N41_1410	V4|V4_0956	LMG8520|LMG8520_0077	IO_1|IO1_2072	LMG8526|LMG8526_0257	KF147|KF147_2245	KF282|KF282_0237	E34|E34_2069	KF201|KF201_0997	M20|M20_2298	ATCC19435|ATCC19435_1879	KF7|KF7_1302	LMG9449|LMG9449_2670	K231|K231_0285	K337|K337_1258	KF24|KF24_0235	Li1|Li1_0255	N42|N42_2341	ML8|ML8_1368	UC317|UC317_1503	KF67|KF67_0010	LMG9446|LMG9446_1340	KF146|KF146_0845	KF134|KF134_1962	KF196|KF196_1305	DRA4|DRA4_0191	IL1403|IL1403_2170	CV56|CV56_2097	KLDS|KLDS_2287	LMG14418|LMG14418_1901	P7266|P7266_1608	44	1
OG_1117	ABC transporter, ATP-binding protein EcsA	A76|A76_2306	UC509_9|UC5099_2065	FG2|FG2_1926	HP|HP_0116	LMG6897|LMG6897_0116	B40|B40_1281	SK11|SK11_2299	AM2|AM2_0198	SK110|SK110_0159	KW10|KW10_0405	KW2|KW2_2037	MG1363|MG1363_2348	NCDO763|NCDO763_2234	N41|N41_1412	V4|V4_0954	LMG8520|LMG8520_0074	IO_1|IO1_2070	LMG8526|LMG8526_0255	KF147|KF147_2243	KF282|KF282_0235	E34|E34_2071	KF201|KF201_0999	M20|M20_2300	ATCC19435|ATCC19435_1881	KF7|KF7_1300	LMG9449|LMG9449_2672	K231|K231_0283	K337|K337_1256	KF24|KF24_0233	Li1|Li1_0253	N42|N42_2339	ML8|ML8_0984	UC317|UC317_1501	KF67|KF67_0008	LMG9446|LMG9446_1338	KF146|KF146_0843	KF134|KF134_1960	KF196|KF196_1303	DRA4|DRA4_0189	IL1403|IL1403_2168	CV56|CV56_2095	KLDS|KLDS_2285	LMG14418|LMG14418_0588	P7266|P7266_1607	44	1
OG_1118	ABC transporter, permease protein EscB	A76|A76_2305	UC509_9|UC5099_2064	FG2|FG2_1925	HP|HP_0115	LMG6897|LMG6897_0115	B40|B40_1280	SK11|SK11_2298	AM2|AM2_0199	SK110|SK110_0160	KW10|KW10_0404	KW2|KW2_2036	MG1363|MG1363_2347	NCDO763|NCDO763_2235	N41|N41_1413	V4|V4_0953	LMG8520|LMG8520_0073	IO_1|IO1_2069	LMG8526|LMG8526_0254	KF147|KF147_2242	KF282|KF282_0234	E34|E34_2072	KF201|KF201_1000	M20|M20_2301	ATCC19435|ATCC19435_1882	KF7|KF7_1299	LMG9449|LMG9449_2673	K231|K231_0282	K337|K337_1255	KF24|KF24_0232	Li1|Li1_0252	N42|N42_2338	ML8|ML8_0983	UC317|UC317_1500	KF67|KF67_0007	LMG9446|LMG9446_1337	KF146|KF146_0842	KF134|KF134_1959	KF196|KF196_1302	DRA4|DRA4_0188	IL1403|IL1403_2167	CV56|CV56_2094	KLDS|KLDS_2284	LMG14418|LMG14418_0589	P7266|P7266_1606	44	1
OG_1119	Cytoplasmic copper homeostasis protein CutC	A76|A76_2304	UC509_9|UC5099_2063	FG2|FG2_1924	HP|HP_0114	LMG6897|LMG6897_0114	B40|B40_1279	SK11|SK11_2297	AM2|AM2_0200	SK110|SK110_0161	KW10|KW10_0403	KW2|KW2_2035	MG1363|MG1363_2346	NCDO763|NCDO763_2236	N41|N41_1414	V4|V4_0952	LMG8520|LMG8520_0072	IO_1|IO1_2068	LMG8526|LMG8526_0253	KF147|KF147_2241	KF282|KF282_0233	E34|E34_2073	KF201|KF201_1001	M20|M20_2302	ATCC19435|ATCC19435_1883	KF7|KF7_1298	LMG9449|LMG9449_2674	K231|K231_0281	K337|K337_1254	KF24|KF24_0231	Li1|Li1_0251	N42|N42_2337	ML8|ML8_0982	UC317|UC317_1499	KF67|KF67_0006	LMG9446|LMG9446_1336	KF146|KF146_0841	KF134|KF134_1958	KF196|KF196_1301	DRA4|DRA4_0187	IL1403|IL1403_2166	CV56|CV56_2093	KLDS|KLDS_2283	LMG14418|LMG14418_0590	P7266|P7266_1605	44	1
OG_112	FIG00755890: hypothetical protein	A76|A76_1481	UC509_9|UC5099_1429	FG2|FG2_1404	HP|HP_1362	LMG6897|LMG6897_1587	B40|B40_2541	SK11|SK11_1487	AM2|AM2_1306 AM2|AM2_1305	SK110|SK110_0779	KW10|KW10_2185	KW2|KW2_1321	MG1363|MG1363_1151	NCDO763|NCDO763_2428	N41|N41_0501	V4|V4_2204	LMG8520|LMG8520_0290	IO_1|IO1_1380		KF147|KF147_1483	KF282|KF282_1704	E34|E34_0786	KF201|KF201_0146	M20|M20_0551	ATCC19435|ATCC19435_0351	KF7|KF7_0446	LMG9449|LMG9449_1423		K337|K337_0663	KF24|KF24_2439	Li1|Li1_1172	N42|N42_0852	ML8|ML8_2072 ML8|ML8_2071	UC317|UC317_0359 UC317|UC317_0358	KF67|KF67_0830	LMG9446|LMG9446_0045	KF146|KF146_0491	KF134|KF134_1606	KF196|KF196_0897	DRA4|DRA4_0824	IL1403|IL1403_1462	CV56|CV56_1396 CV56|CV56_1395		LMG14418|LMG14418_1168		40	FALSE
OG_1120	peptidase, U32 family large subunit [C1]	A76|A76_2280	UC509_9|UC5099_2059	FG2|FG2_1897	HP|HP_0088	LMG6897|LMG6897_0089	B40|B40_1274	SK11|SK11_2276	AM2|AM2_0206	SK110|SK110_0183	KW10|KW10_0398	KW2|KW2_2030	MG1363|MG1363_2319	NCDO763|NCDO763_1673	N41|N41_1419	V4|V4_0947	LMG8520|LMG8520_0067	IO_1|IO1_2063	LMG8526|LMG8526_0233	KF147|KF147_2235	KF282|KF282_0227	E34|E34_2078	KF201|KF201_1007	M20|M20_2334	ATCC19435|ATCC19435_1661	KF7|KF7_1286	LMG9449|LMG9449_0078	K231|K231_0249	K337|K337_1249	KF24|KF24_0200	Li1|Li1_0219	N42|N42_2331	ML8|ML8_0976	UC317|UC317_1494	KF67|KF67_1541	LMG9446|LMG9446_1329	KF146|KF146_1119	KF134|KF134_1953	KF196|KF196_1264	DRA4|DRA4_0165	IL1403|IL1403_2161	CV56|CV56_2088	KLDS|KLDS_2258	LMG14418|LMG14418_1909	P7266|P7266_1601	44	1
OG_1121	Nicotinamide-nucleotide adenylyltransferase,NadR family (EC 2.7.7.1) / Ribosylnicotinamide kinase (EC2.7.1.22)	A76|A76_2278	UC509_9|UC5099_2057	FG2|FG2_0974	HP|HP_0086	LMG6897|LMG6897_0087	B40|B40_1272	SK11|SK11_2274	AM2|AM2_0208	SK110|SK110_0185	KW10|KW10_0396	KW2|KW2_2028	MG1363|MG1363_2317	NCDO763|NCDO763_1675	N41|N41_1421	V4|V4_0945	LMG8520|LMG8520_0064	IO_1|IO1_2061	LMG8526|LMG8526_0231	KF147|KF147_2233	KF282|KF282_0225	E34|E34_2080	KF201|KF201_1009	M20|M20_2336	ATCC19435|ATCC19435_1658	KF7|KF7_1284	LMG9449|LMG9449_0075	K231|K231_0247	K337|K337_1247	KF24|KF24_0198	Li1|Li1_0217	N42|N42_2329	ML8|ML8_0974	UC317|UC317_1492	KF67|KF67_1539	LMG9446|LMG9446_1327	KF146|KF146_1117	KF134|KF134_1951	KF196|KF196_1262	DRA4|DRA4_0163	IL1403|IL1403_2159	CV56|CV56_2086	KLDS|KLDS_2256	LMG14418|LMG14418_1911	P7266|P7266_1600	44	1
OG_1122	Phosphosugar-binding transcriptional repressor,RpiR family	A76|A76_2276	UC509_9|UC5099_2053	FG2|FG2_0972	HP|HP_0084	LMG6897|LMG6897_0085	B40|B40_1270	SK11|SK11_2272	AM2|AM2_0210	SK110|SK110_0187	KW10|KW10_0394	KW2|KW2_2026	MG1363|MG1363_2314	NCDO763|NCDO763_1678	N41|N41_1424	V4|V4_0943	LMG8520|LMG8520_0061	IO_1|IO1_2059	LMG8526|LMG8526_0229	KF147|KF147_2231	KF282|KF282_0223	E34|E34_2082	KF201|KF201_1011	M20|M20_2338	ATCC19435|ATCC19435_1656	KF7|KF7_1282	LMG9449|LMG9449_0073	K231|K231_0245	K337|K337_1245	KF24|KF24_0196	Li1|Li1_0215	N42|N42_2327	ML8|ML8_0972	UC317|UC317_1490	KF67|KF67_1537	LMG9446|LMG9446_1325	KF146|KF146_1115	KF134|KF134_1949	KF196|KF196_1260	DRA4|DRA4_0161	IL1403|IL1403_2157	CV56|CV56_2084	KLDS|KLDS_2254	LMG14418|LMG14418_1913	P7266|P7266_1598	44	1
OG_1123	Lactose and galactose permease, GPHtranslocator family	A76|A76_2274	UC509_9|UC5099_2051	FG2|FG2_0970	HP|HP_0082	LMG6897|LMG6897_0083	B40|B40_1269	SK11|SK11_2271	AM2|AM2_0211	SK110|SK110_0188	KW10|KW10_0393	KW2|KW2_2025	MG1363|MG1363_2313	NCDO763|NCDO763_1679	N41|N41_1425	V4|V4_0942	LMG8520|LMG8520_0060	IO_1|IO1_2058	LMG8526|LMG8526_0228	KF147|KF147_2230	KF282|KF282_0222	E34|E34_2083	KF201|KF201_1012	M20|M20_2339	ATCC19435|ATCC19435_1655	KF7|KF7_1281	LMG9449|LMG9449_0072	K231|K231_0244	K337|K337_1244	KF24|KF24_0195	Li1|Li1_0214	N42|N42_2326	ML8|ML8_0971	UC317|UC317_1489	KF67|KF67_1536	LMG9446|LMG9446_1324	KF146|KF146_1114	KF134|KF134_1948	KF196|KF196_1259	DRA4|DRA4_0160	IL1403|IL1403_2155	CV56|CV56_2083	KLDS|KLDS_2253	LMG14418|LMG14418_1914	P7266|P7266_1597	44	1
OG_1124	Aldose 1-epimerase (EC 5.1.3.3)	A76|A76_2273	UC509_9|UC5099_2050	FG2|FG2_0969	HP|HP_0081	LMG6897|LMG6897_0082	B40|B40_1268	SK11|SK11_2270	AM2|AM2_0212	SK110|SK110_0189	KW10|KW10_0392	KW2|KW2_2024	MG1363|MG1363_2312	NCDO763|NCDO763_1680	N41|N41_1426	V4|V4_0941	LMG8520|LMG8520_0059	IO_1|IO1_2057	LMG8526|LMG8526_0227	KF147|KF147_2229	KF282|KF282_0221	E34|E34_2084	KF201|KF201_1013	M20|M20_2340	ATCC19435|ATCC19435_1654	KF7|KF7_1280	LMG9449|LMG9449_0071	K231|K231_0243	K337|K337_1243	KF24|KF24_0194	Li1|Li1_0213	N42|N42_2325	ML8|ML8_0970	UC317|UC317_1488	KF67|KF67_1535	LMG9446|LMG9446_1323	KF146|KF146_1113	KF134|KF134_1947	KF196|KF196_1258	DRA4|DRA4_0159	IL1403|IL1403_2154	CV56|CV56_2082	KLDS|KLDS_2252	LMG14418|LMG14418_1915	P7266|P7266_1596	44	1
OG_1125	Galactokinase (EC 2.7.1.6)	A76|A76_2271	UC509_9|UC5099_2049	FG2|FG2_0968	HP|HP_0080	LMG6897|LMG6897_0081	B40|B40_1267	SK11|SK11_2269	AM2|AM2_0213	SK110|SK110_0190	KW10|KW10_0391	KW2|KW2_2023	MG1363|MG1363_2311	NCDO763|NCDO763_1681	N41|N41_1427	V4|V4_0940	LMG8520|LMG8520_0058	IO_1|IO1_2056	LMG8526|LMG8526_0226	KF147|KF147_2228	KF282|KF282_0220	E34|E34_2085	KF201|KF201_1014	M20|M20_2341	ATCC19435|ATCC19435_1653	KF7|KF7_1279	LMG9449|LMG9449_0070	K231|K231_0242	K337|K337_1242	KF24|KF24_0193	Li1|Li1_0212	N42|N42_2324	ML8|ML8_0969	UC317|UC317_1487	KF67|KF67_1534	LMG9446|LMG9446_1322	KF146|KF146_1112	KF134|KF134_1946	KF196|KF196_1257	DRA4|DRA4_0158	IL1403|IL1403_2153	CV56|CV56_2081	KLDS|KLDS_2251	LMG14418|LMG14418_1916	P7266|P7266_1595	44	1
OG_1126	UDP-glucose 4-epimerase (EC 5.1.3.2)	A76|A76_2269	UC509_9|UC5099_2047	FG2|FG2_0966	HP|HP_0078	LMG6897|LMG6897_0079	B40|B40_1265	SK11|SK11_2267	AM2|AM2_0219	SK110|SK110_0192	KW10|KW10_0389	KW2|KW2_2021	MG1363|MG1363_2309	NCDO763|NCDO763_1683	N41|N41_1429	V4|V4_0938	LMG8520|LMG8520_0052	IO_1|IO1_2054	LMG8526|LMG8526_0222	KF147|KF147_2224	KF282|KF282_0216	E34|E34_2089	KF201|KF201_1018	M20|M20_2345	ATCC19435|ATCC19435_1649	KF7|KF7_1275	LMG9449|LMG9449_0064	K231|K231_0238	K337|K337_1238	KF24|KF24_0189	Li1|Li1_0208	N42|N42_2320	ML8|ML8_0964	UC317|UC317_1482	KF67|KF67_1530	LMG9446|LMG9446_1318	KF146|KF146_1108	KF134|KF134_1942	KF196|KF196_1253	DRA4|DRA4_0156	IL1403|IL1403_2148	CV56|CV56_2076	KLDS|KLDS_2246	LMG14418|LMG14418_1195	P7266|P7266_1592	44	1
OG_1127	lipoprotein, putative	A76|A76_2268	UC509_9|UC5099_2046	FG2|FG2_0965	HP|HP_0077	LMG6897|LMG6897_0078	B40|B40_1264	SK11|SK11_2266	AM2|AM2_0220	SK110|SK110_0193	KW10|KW10_0388	KW2|KW2_2020	MG1363|MG1363_2308	NCDO763|NCDO763_1684	N41|N41_1430	V4|V4_0937	LMG8520|LMG8520_0050	IO_1|IO1_2053	LMG8526|LMG8526_0221	KF147|KF147_2223	KF282|KF282_0215	E34|E34_2090	KF201|KF201_1019	M20|M20_2346	ATCC19435|ATCC19435_1639	KF7|KF7_1274	LMG9449|LMG9449_0063	K231|K231_0237	K337|K337_1237	KF24|KF24_0188	Li1|Li1_0207	N42|N42_2319	ML8|ML8_0963	UC317|UC317_2398	KF67|KF67_1520	LMG9446|LMG9446_1317	KF146|KF146_1107	KF134|KF134_1941	KF196|KF196_1252	DRA4|DRA4_0155	IL1403|IL1403_2147	CV56|CV56_2075	KLDS|KLDS_2245	LMG14418|LMG14418_1194	P7266|P7266_1591	44	1
OG_1128	DNA recombination and repair protein RecF	A76|A76_2265	UC509_9|UC5099_2043	FG2|FG2_0962	HP|HP_0074	LMG6897|LMG6897_0075	B40|B40_1261	SK11|SK11_2263	AM2|AM2_0223	SK110|SK110_0196	KW10|KW10_0385	KW2|KW2_2017	MG1363|MG1363_2305	NCDO763|NCDO763_0583	N41|N41_1433	V4|V4_0934	LMG8520|LMG8520_0048	IO_1|IO1_2050	LMG8526|LMG8526_0218	KF147|KF147_2220	KF282|KF282_0212	E34|E34_2093	KF201|KF201_1022	M20|M20_2349	ATCC19435|ATCC19435_1636	KF7|KF7_1271	LMG9449|LMG9449_0059	K231|K231_0233	K337|K337_1234	KF24|KF24_0184	Li1|Li1_0203	N42|N42_2316	ML8|ML8_0960	UC317|UC317_2395	KF67|KF67_1517	LMG9446|LMG9446_1314	KF146|KF146_1104	KF134|KF134_1938	KF196|KF196_1249	DRA4|DRA4_0152	IL1403|IL1403_2144	CV56|CV56_2072	KLDS|KLDS_2242	LMG14418|LMG14418_1191	P7266|P7266_1589	44	1
OG_1129	FIG002958: hypothetical protein	A76|A76_2264	UC509_9|UC5099_2042	FG2|FG2_0961	HP|HP_0073	LMG6897|LMG6897_0074	B40|B40_1260	SK11|SK11_2262	AM2|AM2_0224	SK110|SK110_0197	KW10|KW10_0384	KW2|KW2_2016	MG1363|MG1363_2304	NCDO763|NCDO763_0584	N41|N41_1434	V4|V4_0933	LMG8520|LMG8520_0047	IO_1|IO1_2049	LMG8526|LMG8526_0217	KF147|KF147_2219	KF282|KF282_0211	E34|E34_2094	KF201|KF201_1023	M20|M20_2350	ATCC19435|ATCC19435_1635	KF7|KF7_1270	LMG9449|LMG9449_0058	K231|K231_0232	K337|K337_1233	KF24|KF24_0183	Li1|Li1_0202	N42|N42_2315	ML8|ML8_0959	UC317|UC317_2394	KF67|KF67_1516	LMG9446|LMG9446_1313	KF146|KF146_1103	KF134|KF134_1937	KF196|KF196_1248	DRA4|DRA4_0151	IL1403|IL1403_2143	CV56|CV56_2071	KLDS|KLDS_2241	LMG14418|LMG14418_1190	P7266|P7266_1588	44	1
OG_113	PhnO protein		UC509_9|UC5099_0606	FG2|FG2_1656	HP|HP_0362	LMG6897|LMG6897_0022	B40|B40_0194 B40|B40_0195	SK11|SK11_0584	AM2|AM2_1754	SK110|SK110_1881	KW10|KW10_0845	KW2|KW2_0517	MG1363|MG1363_0565	NCDO763|NCDO763_2265	N41|N41_1635	V4|V4_1738	LMG8520|LMG8520_0814 LMG8520|LMG8520_0815	IO_1|IO1_0489	LMG8526|LMG8526_0842	KF147|KF147_0574	KF282|KF282_1449	E34|E34_0817	KF201|KF201_1894	M20|M20_0574	ATCC19435|ATCC19435_0425	KF7|KF7_1817	LMG9449|LMG9449_2354	K231|K231_0161	K337|K337_1110	KF24|KF24_1375	Li1|Li1_0809	N42|N42_0025	ML8|ML8_2171	UC317|UC317_0296	KF67|KF67_2385	LMG9446|LMG9446_1926	KF146|KF146_1154	KF134|KF134_2199	KF196|KF196_2042	DRA4|DRA4_2300	IL1403|IL1403_0620	CV56|CV56_0537	KLDS|KLDS_0621	LMG14418|LMG14418_0694	P7266|P7266_0738	43	FALSE
OG_1130	FIG001621: Zinc protease	A76|A76_2263	UC509_9|UC5099_2041	FG2|FG2_0960	HP|HP_0072	LMG6897|LMG6897_0073	B40|B40_1259	SK11|SK11_2261	AM2|AM2_0225	SK110|SK110_0198	KW10|KW10_0383	KW2|KW2_2015	MG1363|MG1363_2303	NCDO763|NCDO763_0585	N41|N41_1435	V4|V4_0932	LMG8520|LMG8520_0046	IO_1|IO1_2048	LMG8526|LMG8526_0216	KF147|KF147_2218	KF282|KF282_0210	E34|E34_2095	KF201|KF201_1024	M20|M20_2351	ATCC19435|ATCC19435_1634	KF7|KF7_1269	LMG9449|LMG9449_0057	K231|K231_0231	K337|K337_1232	KF24|KF24_0182	Li1|Li1_0201	N42|N42_2314	ML8|ML8_0958	UC317|UC317_2393	KF67|KF67_1515	LMG9446|LMG9446_1312	KF146|KF146_1102	KF134|KF134_1936	KF196|KF196_1247	DRA4|DRA4_0150	IL1403|IL1403_2142	CV56|CV56_2070	KLDS|KLDS_2240	LMG14418|LMG14418_1189	P7266|P7266_1587	44	1
OG_1131	FIG009210: peptidase, M16 family	A76|A76_2262	UC509_9|UC5099_2040	FG2|FG2_0959	HP|HP_0071	LMG6897|LMG6897_0072	B40|B40_1258	SK11|SK11_2260	AM2|AM2_0226	SK110|SK110_0199	KW10|KW10_0382	KW2|KW2_2014	MG1363|MG1363_2302	NCDO763|NCDO763_0586	N41|N41_1436	V4|V4_0931	LMG8520|LMG8520_0045	IO_1|IO1_2047	LMG8526|LMG8526_0215	KF147|KF147_2217	KF282|KF282_0209	E34|E34_2096	KF201|KF201_1025	M20|M20_2352	ATCC19435|ATCC19435_1633	KF7|KF7_1268	LMG9449|LMG9449_0056	K231|K231_0230	K337|K337_1231	KF24|KF24_0181	Li1|Li1_0200	N42|N42_2313	ML8|ML8_0957	UC317|UC317_2392	KF67|KF67_1514	LMG9446|LMG9446_1311	KF146|KF146_1101	KF134|KF134_1935	KF196|KF196_1246	DRA4|DRA4_0149	IL1403|IL1403_2141	CV56|CV56_2069	KLDS|KLDS_2239	LMG14418|LMG14418_1188	P7266|P7266_1586	44	1
OG_1132	CDP-diacylglycerol--glycerol-3-phosphate3-phosphatidyltransferase (EC 2.7.8.5)	A76|A76_2260	UC509_9|UC5099_2038	FG2|FG2_0957	HP|HP_0069	LMG6897|LMG6897_0070	B40|B40_1256	SK11|SK11_2258	AM2|AM2_0228	SK110|SK110_0201	KW10|KW10_0380	KW2|KW2_2012	MG1363|MG1363_2300	NCDO763|NCDO763_0588	N41|N41_1438	V4|V4_0929	LMG8520|LMG8520_0043	IO_1|IO1_2045	LMG8526|LMG8526_0213	KF147|KF147_2215	KF282|KF282_0207	E34|E34_2098	KF201|KF201_1027	M20|M20_2354	ATCC19435|ATCC19435_1631	KF7|KF7_1266	LMG9449|LMG9449_0054	K231|K231_0228	K337|K337_1229	KF24|KF24_0179	Li1|Li1_0198	N42|N42_2311	ML8|ML8_0955	UC317|UC317_2390	KF67|KF67_1512	LMG9446|LMG9446_1309	KF146|KF146_1099	KF134|KF134_1933	KF196|KF196_1244	DRA4|DRA4_0147	IL1403|IL1403_2139	CV56|CV56_2067	KLDS|KLDS_2237	LMG14418|LMG14418_1186	P7266|P7266_1584	44	1
OG_1133	Histidyl-tRNA synthetase (EC 6.1.1.21)	A76|A76_2257	UC509_9|UC5099_2034	FG2|FG2_0953	HP|HP_0065	LMG6897|LMG6897_0066	B40|B40_1252	SK11|SK11_2254	AM2|AM2_0232	SK110|SK110_0204	KW10|KW10_0379	KW2|KW2_2006	MG1363|MG1363_2296	NCDO763|NCDO763_0593	N41|N41_1443	V4|V4_0924	LMG8520|LMG8520_0037	IO_1|IO1_2041	LMG8526|LMG8526_0209	KF147|KF147_2209	KF282|KF282_0203	E34|E34_2102	KF201|KF201_1030	M20|M20_2358	ATCC19435|ATCC19435_1628	KF7|KF7_1263	LMG9449|LMG9449_0050	K231|K231_0224	K337|K337_1226	KF24|KF24_0176	Li1|Li1_0195	N42|N42_2307	ML8|ML8_0951	UC317|UC317_2386	KF67|KF67_1509	LMG9446|LMG9446_1304	KF146|KF146_1095	KF134|KF134_1929	KF196|KF196_1240	DRA4|DRA4_0144	IL1403|IL1403_2135	CV56|CV56_2063	KLDS|KLDS_2233	LMG14418|LMG14418_1183	P7266|P7266_1583	44	1
OG_1134	Diadenosine tetraphosphate (Ap4A) hydrolase andother HIT family hydrolases	A76|A76_2256	UC509_9|UC5099_2033	FG2|FG2_0952	HP|HP_0064	LMG6897|LMG6897_0065	B40|B40_1251	SK11|SK11_2253	AM2|AM2_0234	SK110|SK110_0205	KW10|KW10_0378	KW2|KW2_2005	MG1363|MG1363_2295	NCDO763|NCDO763_0594	N41|N41_1444	V4|V4_0923	LMG8520|LMG8520_0036	IO_1|IO1_2040	LMG8526|LMG8526_0208	KF147|KF147_2208	KF282|KF282_0202	E34|E34_2104	KF201|KF201_1031	M20|M20_2359	ATCC19435|ATCC19435_1627	KF7|KF7_1261	LMG9449|LMG9449_0049	K231|K231_0223	K337|K337_1224	KF24|KF24_0175	Li1|Li1_0194	N42|N42_2306	ML8|ML8_0949	UC317|UC317_2384	KF67|KF67_1508	LMG9446|LMG9446_1303	KF146|KF146_1094	KF134|KF134_1928	KF196|KF196_1239	DRA4|DRA4_0143	IL1403|IL1403_2133	CV56|CV56_2061	KLDS|KLDS_2231	LMG14418|LMG14418_1181	P7266|P7266_1582	44	1
OG_1135	Aspartyl-tRNA synthetase (EC 6.1.1.12)	A76|A76_2255	UC509_9|UC5099_2032	FG2|FG2_0951	HP|HP_0063	LMG6897|LMG6897_0064	B40|B40_1250	SK11|SK11_2252	AM2|AM2_0235	SK110|SK110_0206	KW10|KW10_0377	KW2|KW2_2004	MG1363|MG1363_2294	NCDO763|NCDO763_0595	N41|N41_1445	V4|V4_0922	LMG8520|LMG8520_0035	IO_1|IO1_2039	LMG8526|LMG8526_0207	KF147|KF147_2207	KF282|KF282_0201	E34|E34_2105	KF201|KF201_1032	M20|M20_2360	ATCC19435|ATCC19435_1626	KF7|KF7_1260	LMG9449|LMG9449_0048	K231|K231_0222	K337|K337_1223	KF24|KF24_0174	Li1|Li1_0193	N42|N42_2305	ML8|ML8_0948	UC317|UC317_2383	KF67|KF67_1507	LMG9446|LMG9446_1302	KF146|KF146_1093	KF134|KF134_1927	KF196|KF196_1238	DRA4|DRA4_0142	IL1403|IL1403_2132	CV56|CV56_2060	KLDS|KLDS_2230	LMG14418|LMG14418_1180	P7266|P7266_1581	44	1
OG_1136	Integral membrane protein	A76|A76_2254	UC509_9|UC5099_2031	FG2|FG2_0950	HP|HP_0062	LMG6897|LMG6897_0063	B40|B40_1249	SK11|SK11_2251	AM2|AM2_0236	SK110|SK110_0207	KW10|KW10_0376	KW2|KW2_2003	MG1363|MG1363_2293	NCDO763|NCDO763_0596	N41|N41_1446	V4|V4_0921	LMG8520|LMG8520_0034	IO_1|IO1_2038	LMG8526|LMG8526_0206	KF147|KF147_2206	KF282|KF282_0200	E34|E34_2106	KF201|KF201_1033	M20|M20_2361	ATCC19435|ATCC19435_1625	KF7|KF7_1259	LMG9449|LMG9449_0047	K231|K231_0221	K337|K337_1222	KF24|KF24_0173	Li1|Li1_0192	N42|N42_2304	ML8|ML8_0947	UC317|UC317_2382	KF67|KF67_1506	LMG9446|LMG9446_1301	KF146|KF146_1092	KF134|KF134_1926	KF196|KF196_1237	DRA4|DRA4_0141	IL1403|IL1403_2131	CV56|CV56_2059	KLDS|KLDS_2229	LMG14418|LMG14418_1179	P7266|P7266_1580	44	1
OG_1137	Transporter	A76|A76_2252	UC509_9|UC5099_2029	FG2|FG2_0948	HP|HP_0060	LMG6897|LMG6897_0061	B40|B40_1247	SK11|SK11_2249	AM2|AM2_0238	SK110|SK110_0209	KW10|KW10_0374	KW2|KW2_2001	MG1363|MG1363_2291	NCDO763|NCDO763_0598	N41|N41_1448	V4|V4_0919	LMG8520|LMG8520_0031	IO_1|IO1_2036	LMG8526|LMG8526_0204	KF147|KF147_2204	KF282|KF282_0198	E34|E34_2108	KF201|KF201_1035	M20|M20_2363	ATCC19435|ATCC19435_1623	KF7|KF7_1257	LMG9449|LMG9449_0045	K231|K231_0219	K337|K337_1220	KF24|KF24_0171	Li1|Li1_0190	N42|N42_2302	ML8|ML8_0945	UC317|UC317_2380	KF67|KF67_1504	LMG9446|LMG9446_1299	KF146|KF146_1090	KF134|KF134_1924	KF196|KF196_1235	DRA4|DRA4_0139	IL1403|IL1403_2129	CV56|CV56_2057	KLDS|KLDS_2227	LMG14418|LMG14418_1177	P7266|P7266_1577	44	1
OG_1138	FIG00755425: hypothetical protein	A76|A76_2251	UC509_9|UC5099_2028	FG2|FG2_0947	HP|HP_0059	LMG6897|LMG6897_0060	B40|B40_1246	SK11|SK11_2248	AM2|AM2_0239	SK110|SK110_0210	KW10|KW10_0373	KW2|KW2_2000	MG1363|MG1363_2290	NCDO763|NCDO763_0599	N41|N41_1449	V4|V4_0918	LMG8520|LMG8520_0030	IO_1|IO1_2035	LMG8526|LMG8526_0203	KF147|KF147_2203	KF282|KF282_0197	E34|E34_2109	KF201|KF201_1036	M20|M20_2364	ATCC19435|ATCC19435_1622	KF7|KF7_1256	LMG9449|LMG9449_0044	K231|K231_0218	K337|K337_1219	KF24|KF24_0170	Li1|Li1_0189	N42|N42_2301	ML8|ML8_0944	UC317|UC317_2379	KF67|KF67_1503	LMG9446|LMG9446_1298	KF146|KF146_1089	KF134|KF134_1923	KF196|KF196_1234	DRA4|DRA4_0138	IL1403|IL1403_2128	CV56|CV56_2056	KLDS|KLDS_2226	LMG14418|LMG14418_1176	P7266|P7266_1574	44	1
OG_1139	tRNA dihydrouridine synthase B (EC 1.-.-.-)	A76|A76_2250	UC509_9|UC5099_2027	FG2|FG2_0946	HP|HP_0058	LMG6897|LMG6897_0059	B40|B40_1245	SK11|SK11_2247	AM2|AM2_0240	SK110|SK110_0211	KW10|KW10_0372	KW2|KW2_1999	MG1363|MG1363_2289	NCDO763|NCDO763_0600	N41|N41_1450	V4|V4_0917	LMG8520|LMG8520_0029	IO_1|IO1_2034	LMG8526|LMG8526_0202	KF147|KF147_2202	KF282|KF282_0196	E34|E34_2110	KF201|KF201_1037	M20|M20_2365	ATCC19435|ATCC19435_1621	KF7|KF7_1255	LMG9449|LMG9449_0043	K231|K231_0217	K337|K337_1218	KF24|KF24_0169	Li1|Li1_0188	N42|N42_2300	ML8|ML8_0943	UC317|UC317_2378	KF67|KF67_1502	LMG9446|LMG9446_1297	KF146|KF146_1088	KF134|KF134_1922	KF196|KF196_1233	DRA4|DRA4_0137	IL1403|IL1403_2127	CV56|CV56_2055	KLDS|KLDS_2225	LMG14418|LMG14418_1175	P7266|P7266_1573	44	1
OG_114	Muramoyltetrapeptide carboxypeptidase (EC3.4.17.13)	A76|A76_0785	UC509_9|UC5099_1749	FG2|FG2_1794	HP|HP_0712	LMG6897|LMG6897_1945	B40|B40_0672 B40|B40_0673	SK11|SK11_1898	AM2|AM2_0808	SK110|SK110_1980	KW10|KW10_0204	KW2|KW2_1686			N41|N41_0086	V4|V4_0041	LMG8520|LMG8520_1328	IO_1|IO1_1768	LMG8526|LMG8526_0487	KF147|KF147_1934	KF282|KF282_1008	E34|E34_1676	KF201|KF201_0479	M20|M20_1039	ATCC19435|ATCC19435_1697	KF7|KF7_0893	LMG9449|LMG9449_1525	K231|K231_0935	K337|K337_0066	KF24|KF24_0774	Li1|Li1_1381	N42|N42_1710	ML8|ML8_2420	UC317|UC317_0544	KF67|KF67_2036	LMG9446|LMG9446_1745	KF146|KF146_1650	KF134|KF134_0464	KF196|KF196_1719	DRA4|DRA4_2001	IL1403|IL1403_1849	CV56|CV56_1723	KLDS|KLDS_1897	LMG14418|LMG14418_1732	P7266|P7266_1902	42	FALSE
OG_1140	Dihydrofolate reductase (EC 1.5.1.3)	A76|A76_2240	UC509_9|UC5099_2018	FG2|FG2_1746	HP|HP_1509	LMG6897|LMG6897_2228	B40|B40_1236	SK11|SK11_2237	AM2|AM2_0241	SK110|SK110_1296	KW10|KW10_0366	KW2|KW2_1995	MG1363|MG1363_2285	NCDO763|NCDO763_0605	N41|N41_1454	V4|V4_0913	LMG8520|LMG8520_0028	IO_1|IO1_2033	LMG8526|LMG8526_0201	KF147|KF147_2201	KF282|KF282_0195	E34|E34_2111	KF201|KF201_1038	M20|M20_2366	ATCC19435|ATCC19435_1620	KF7|KF7_1254	LMG9449|LMG9449_0042	K231|K231_0216	K337|K337_1217	KF24|KF24_0168	Li1|Li1_0187	N42|N42_2299	ML8|ML8_0942	UC317|UC317_2377	KF67|KF67_1501	LMG9446|LMG9446_1296	KF146|KF146_1087	KF134|KF134_1921	KF196|KF196_1232	DRA4|DRA4_0726	IL1403|IL1403_2126	CV56|CV56_2054	KLDS|KLDS_2224	LMG14418|LMG14418_1174	P7266|P7266_1572	44	1
OG_1141	Adenylosuccinate synthetase (EC 6.3.4.4)	A76|A76_2235	UC509_9|UC5099_2014	FG2|FG2_1751	HP|HP_1514	LMG6897|LMG6897_2233	B40|B40_1231	SK11|SK11_2232	AM2|AM2_0250	SK110|SK110_1301	KW10|KW10_0362	KW2|KW2_1991	MG1363|MG1363_2281	NCDO763|NCDO763_0609	N41|N41_1458	V4|V4_0909	LMG8520|LMG8520_0020	IO_1|IO1_2024	LMG8526|LMG8526_0195	KF147|KF147_2191	KF282|KF282_0186	E34|E34_2120	KF201|KF201_1048	M20|M20_2375	ATCC19435|ATCC19435_1611	KF7|KF7_1244	LMG9449|LMG9449_0032	K231|K231_0207	K337|K337_1208	KF24|KF24_0159	Li1|Li1_0178	N42|N42_2290	ML8|ML8_0933	UC317|UC317_2368	KF67|KF67_1492	LMG9446|LMG9446_1287	KF146|KF146_1078	KF134|KF134_1912	KF196|KF196_1223	DRA4|DRA4_0731	IL1403|IL1403_2116	CV56|CV56_2045	KLDS|KLDS_2214	LMG14418|LMG14418_1810	P7266|P7266_1570	44	1
OG_1142	Chitin binding protein	A76|A76_2234	UC509_9|UC5099_2013	FG2|FG2_1752	HP|HP_1515	LMG6897|LMG6897_2234	B40|B40_1229	SK11|SK11_2231	AM2|AM2_0251	SK110|SK110_1302	KW10|KW10_0361	KW2|KW2_1990	MG1363|MG1363_2280	NCDO763|NCDO763_0610	N41|N41_1459	V4|V4_0908	LMG8520|LMG8520_0019	IO_1|IO1_2023	LMG8526|LMG8526_0194	KF147|KF147_2190	KF282|KF282_0185	E34|E34_2121	KF201|KF201_1049	M20|M20_2376	ATCC19435|ATCC19435_1610	KF7|KF7_1243	LMG9449|LMG9449_0031	K231|K231_0206	K337|K337_1207	KF24|KF24_0158	Li1|Li1_0177	N42|N42_2289	ML8|ML8_0932	UC317|UC317_2367	KF67|KF67_1491	LMG9446|LMG9446_1286	KF146|KF146_1077	KF134|KF134_1911	KF196|KF196_1222	DRA4|DRA4_0732	IL1403|IL1403_2115	CV56|CV56_2044	KLDS|KLDS_2213	LMG14418|LMG14418_1809	P7266|P7266_1133	44	1
OG_1143	FIG00755368: hypothetical protein	A76|A76_2207	UC509_9|UC5099_1989	FG2|FG2_2629	HP|HP_2299	LMG6897|LMG6897_1067	B40|B40_0753	SK11|SK11_2202	AM2|AM2_1853	SK110|SK110_1668	KW10|KW10_0336	KW2|KW2_1967	MG1363|MG1363_2250	NCDO763|NCDO763_1300	N41|N41_0742	V4|V4_0884	LMG8520|LMG8520_1307	IO_1|IO1_2000	LMG8526|LMG8526_0170	KF147|KF147_2167	KF282|KF282_0160	E34|E34_2144	KF201|KF201_1737	M20|M20_2382	ATCC19435|ATCC19435_1584	KF7|KF7_1219	LMG9449|LMG9449_0005	K231|K231_0182	K337|K337_1184	KF24|KF24_0134	Li1|Li1_0153	N42|N42_2263	ML8|ML8_0908	UC317|UC317_2343	KF67|KF67_1467	LMG9446|LMG9446_1261	KF146|KF146_1052	KF134|KF134_1870	KF196|KF196_1198	DRA4|DRA4_0525	IL1403|IL1403_2067	CV56|CV56_2019	KLDS|KLDS_2190	LMG14418|LMG14418_1552	P7266|P7266_1545	44	1
OG_1144	Manganese transport protein MntH	A76|A76_2209	UC509_9|UC5099_1990	FG2|FG2_2628	HP|HP_2297	LMG6897|LMG6897_1065	B40|B40_0751	SK11|SK11_2204	AM2|AM2_1854	SK110|SK110_1666	KW10|KW10_0337	KW2|KW2_1968	MG1363|MG1363_2251	NCDO763|NCDO763_1301	N41|N41_0741	V4|V4_0885	LMG8520|LMG8520_1306	IO_1|IO1_2001	LMG8526|LMG8526_0171	KF147|KF147_2168	KF282|KF282_0161	E34|E34_2143	KF201|KF201_1738	M20|M20_2383	ATCC19435|ATCC19435_1585	KF7|KF7_1220	LMG9449|LMG9449_0006	K231|K231_0183	K337|K337_1185	KF24|KF24_0135	Li1|Li1_0154	N42|N42_2264	ML8|ML8_0909	UC317|UC317_2344	KF67|KF67_1468	LMG9446|LMG9446_1262	KF146|KF146_1053	KF134|KF134_1871	KF196|KF196_1199	DRA4|DRA4_0523	IL1403|IL1403_2069	CV56|CV56_2021	KLDS|KLDS_2191	LMG14418|LMG14418_1553	P7266|P7266_1546	44	1
OG_1145	Nitroreductase family protein	A76|A76_2210	UC509_9|UC5099_1991	FG2|FG2_2627	HP|HP_2296	LMG6897|LMG6897_1064	B40|B40_0749	SK11|SK11_2205	AM2|AM2_1855	SK110|SK110_1665	KW10|KW10_0338	KW2|KW2_1969	MG1363|MG1363_2252	NCDO763|NCDO763_1302	N41|N41_0740	V4|V4_0886	LMG8520|LMG8520_1305	IO_1|IO1_2002	LMG8526|LMG8526_0172	KF147|KF147_2169	KF282|KF282_0162	E34|E34_2142	KF201|KF201_1739	M20|M20_2384	ATCC19435|ATCC19435_1586	KF7|KF7_1221	LMG9449|LMG9449_0007	K231|K231_0184	K337|K337_1186	KF24|KF24_0136	Li1|Li1_0155	N42|N42_2265	ML8|ML8_0910	UC317|UC317_2345	KF67|KF67_1469	LMG9446|LMG9446_1263	KF146|KF146_1054	KF134|KF134_1872	KF196|KF196_1200	DRA4|DRA4_0522	IL1403|IL1403_2070	CV56|CV56_2022	KLDS|KLDS_2192	LMG14418|LMG14418_1555	P7266|P7266_1547	44	1
OG_1146	Uracil phosphoribosyltransferase (EC 2.4.2.9)	A76|A76_2211	UC509_9|UC5099_1992	FG2|FG2_2626	HP|HP_2295	LMG6897|LMG6897_1063	B40|B40_0748	SK11|SK11_2206	AM2|AM2_1856	SK110|SK110_1664	KW10|KW10_0339	KW2|KW2_1970	MG1363|MG1363_2257	NCDO763|NCDO763_0633	N41|N41_1481	V4|V4_0887	LMG8520|LMG8520_1304	IO_1|IO1_2003	LMG8526|LMG8526_0173	KF147|KF147_2170	KF282|KF282_0163	E34|E34_2141	KF201|KF201_1740	M20|M20_2385	ATCC19435|ATCC19435_1587	KF7|KF7_1222	LMG9449|LMG9449_0008	K231|K231_0185	K337|K337_1187	KF24|KF24_0137	Li1|Li1_0156	N42|N42_2266	ML8|ML8_0911	UC317|UC317_2346	KF67|KF67_1470	LMG9446|LMG9446_1264	KF146|KF146_1055	KF134|KF134_1873	KF196|KF196_1201	DRA4|DRA4_0521	IL1403|IL1403_2071	CV56|CV56_2023	KLDS|KLDS_2193	LMG14418|LMG14418_1556	P7266|P7266_1548	44	1
OG_1147	Na+/H+ antiporter	A76|A76_2212	UC509_9|UC5099_1993	FG2|FG2_2625	HP|HP_0258	LMG6897|LMG6897_0020	B40|B40_0747	SK11|SK11_2207	AM2|AM2_1857	SK110|SK110_1663	KW10|KW10_0340	KW2|KW2_1971	MG1363|MG1363_2258	NCDO763|NCDO763_0632	N41|N41_1480	V4|V4_0888	LMG8520|LMG8520_1303	IO_1|IO1_2004	LMG8526|LMG8526_0174	KF147|KF147_2171	KF282|KF282_0164	E34|E34_2140	KF201|KF201_1741	M20|M20_2386	ATCC19435|ATCC19435_1588	KF7|KF7_1223	LMG9449|LMG9449_0009	K231|K231_0186	K337|K337_1188	KF24|KF24_0138	Li1|Li1_0157	N42|N42_2267	ML8|ML8_0912	UC317|UC317_2347	KF67|KF67_1471	LMG9446|LMG9446_1265	KF146|KF146_1056	KF134|KF134_1874	KF196|KF196_1202	DRA4|DRA4_0520	IL1403|IL1403_2072	CV56|CV56_2024	KLDS|KLDS_2194	LMG14418|LMG14418_1557	P7266|P7266_1549	44	1
OG_1148	Cystathionine gamma-synthase (EC 2.5.1.48)	A76|A76_2214	UC509_9|UC5099_1995	FG2|FG2_2622	HP|HP_0255	LMG6897|LMG6897_0017	B40|B40_0744	SK11|SK11_2211	AM2|AM2_1859	SK110|SK110_1660	KW10|KW10_0342	KW2|KW2_1973	MG1363|MG1363_2261	NCDO763|NCDO763_0629	N41|N41_1478	V4|V4_0890	LMG8520|LMG8520_1299	IO_1|IO1_2006	LMG8526|LMG8526_0176	KF147|KF147_2173	KF282|KF282_0167	E34|E34_2138	KF201|KF201_1743	M20|M20_2388	ATCC19435|ATCC19435_1591	KF7|KF7_1225	LMG9449|LMG9449_0011	K231|K231_0188	K337|K337_1190	KF24|KF24_0140	Li1|Li1_0159	N42|N42_2270	ML8|ML8_0914	UC317|UC317_2349	KF67|KF67_1473	LMG9446|LMG9446_1267	KF146|KF146_1059	KF134|KF134_1876	KF196|KF196_1204	DRA4|DRA4_0517	IL1403|IL1403_2074	CV56|CV56_2026	KLDS|KLDS_2196	LMG14418|LMG14418_1559	P7266|P7266_1552	44	1
OG_1149	Transporter	A76|A76_2219	UC509_9|UC5099_1998	FG2|FG2_2617	HP|HP_0250	LMG6897|LMG6897_0012	B40|B40_0740	SK11|SK11_2215	AM2|AM2_1862	SK110|SK110_1656	KW10|KW10_0345	KW2|KW2_1976	MG1363|MG1363_2264	NCDO763|NCDO763_0626	N41|N41_1474	V4|V4_0893	LMG8520|LMG8520_0003	IO_1|IO1_2009	LMG8526|LMG8526_0179	KF147|KF147_2176	KF282|KF282_0170	E34|E34_2135	KF201|KF201_1746	M20|M20_2391	ATCC19435|ATCC19435_1594	KF7|KF7_1228	LMG9449|LMG9449_0014	K231|K231_0191	K337|K337_1193	KF24|KF24_0143	Li1|Li1_0162	N42|N42_2273	ML8|ML8_0917	UC317|UC317_2352	KF67|KF67_1476	LMG9446|LMG9446_1270	KF146|KF146_1062	KF134|KF134_1879	KF196|KF196_1207	DRA4|DRA4_0513	IL1403|IL1403_2077	CV56|CV56_2029	KLDS|KLDS_2199	LMG14418|LMG14418_1562	P7266|P7266_1556	44	1
OG_115	N-acetylmuramoyl-L-alanine amidase (EC3.5.1.28)	A76|A76_0267 A76|A76_0266	UC509_9|UC5099_0223 UC509_9|UC5099_0220	FG2|FG2_1439	HP|HP_0544	LMG6897|LMG6897_0546	B40|B40_2207	SK11|SK11_0217 SK11|SK11_0216	AM2|AM2_1601	SK110|SK110_1029 SK110|SK110_1028	KW10|KW10_1656	KW2|KW2_0200	MG1363|MG1363_0233	NCDO763|NCDO763_0320	N41|N41_0281	V4|V4_2512	LMG8520|LMG8520_1834	IO_1|IO1_0193	LMG8526|LMG8526_1296	KF147|KF147_0218	KF282|KF282_0438	E34|E34_0186	KF201|KF201_0149	M20|M20_1402	ATCC19435|ATCC19435_0933	KF7|KF7_0684	LMG9449|LMG9449_1193	K231|K231_1637	K337|K337_0358	KF24|KF24_1088	Li1|Li1_1953	N42|N42_2152	ML8|ML8_0446	UC317|UC317_0021	KF67|KF67_0332	LMG9446|LMG9446_0965	KF146|KF146_0273	KF134|KF134_1358	KF196|KF196_2340	DRA4|DRA4_1016 DRA4|DRA4_1017	IL1403|IL1403_0246	CV56|CV56_0241	KLDS|KLDS_0271	LMG14418|LMG14418_2133	P7266|P7266_0845	44	1
OG_1150	LacX protein, plasmid	A76|A76_2220	UC509_9|UC5099_1999	FG2|FG2_2616	HP|HP_0249	LMG6897|LMG6897_0011	B40|B40_0739	SK11|SK11_2216	AM2|AM2_1864	SK110|SK110_1655	KW10|KW10_0346	KW2|KW2_1977	MG1363|MG1363_2265	NCDO763|NCDO763_0625	N41|N41_1473	V4|V4_0894	LMG8520|LMG8520_0005	IO_1|IO1_2010	LMG8526|LMG8526_0180	KF147|KF147_2177	KF282|KF282_0171	E34|E34_2134	KF201|KF201_1747	M20|M20_2392	ATCC19435|ATCC19435_1595	KF7|KF7_1230	LMG9449|LMG9449_0015	K231|K231_0192	K337|K337_1194	KF24|KF24_0144	Li1|Li1_0163	N42|N42_2274	ML8|ML8_0919	UC317|UC317_2354	KF67|KF67_1477	LMG9446|LMG9446_1271	KF146|KF146_1063	KF134|KF134_1880	KF196|KF196_1208	DRA4|DRA4_0512	IL1403|IL1403_2079	CV56|CV56_2031	KLDS|KLDS_2200	LMG14418|LMG14418_1563	P7266|P7266_1557	44	1
OG_1151	3'->5' exoribonuclease Bsu YhaM	A76|A76_2221	UC509_9|UC5099_2000	FG2|FG2_2615	HP|HP_0248	LMG6897|LMG6897_0010	B40|B40_0738	SK11|SK11_2217	AM2|AM2_1865	SK110|SK110_1654	KW10|KW10_0347	KW2|KW2_1978	MG1363|MG1363_2266	NCDO763|NCDO763_0624	N41|N41_1472	V4|V4_0895	LMG8520|LMG8520_0006	IO_1|IO1_2011	LMG8526|LMG8526_0181	KF147|KF147_2178	KF282|KF282_0173	E34|E34_2133	KF201|KF201_1748	M20|M20_2393	ATCC19435|ATCC19435_1596	KF7|KF7_1231	LMG9449|LMG9449_0016	K231|K231_0193	K337|K337_1195	KF24|KF24_0145	Li1|Li1_0164	N42|N42_2275	ML8|ML8_0920	UC317|UC317_2355	KF67|KF67_1478	LMG9446|LMG9446_1272	KF146|KF146_1064	KF134|KF134_1881	KF196|KF196_1209	DRA4|DRA4_0511	IL1403|IL1403_2080	CV56|CV56_2032	KLDS|KLDS_2201	LMG14418|LMG14418_1564	P7266|P7266_1558	44	1
OG_1152	DNA recombination protein RmuC	A76|A76_2222	UC509_9|UC5099_2001	FG2|FG2_2614	HP|HP_0247	LMG6897|LMG6897_0009	B40|B40_0737	SK11|SK11_2218	AM2|AM2_1866	SK110|SK110_1653	KW10|KW10_0348	KW2|KW2_1979	MG1363|MG1363_2267	NCDO763|NCDO763_0623	N41|N41_1471	V4|V4_0896	LMG8520|LMG8520_0007	IO_1|IO1_2012	LMG8526|LMG8526_0182	KF147|KF147_2179	KF282|KF282_0174	E34|E34_2132	KF201|KF201_1749	M20|M20_2394	ATCC19435|ATCC19435_1597	KF7|KF7_1232	LMG9449|LMG9449_0017	K231|K231_0194	K337|K337_1196	KF24|KF24_0146	Li1|Li1_0165	N42|N42_2276	ML8|ML8_0921	UC317|UC317_2356	KF67|KF67_1479	LMG9446|LMG9446_1273	KF146|KF146_1065	KF134|KF134_1882	KF196|KF196_1210	DRA4|DRA4_0510	IL1403|IL1403_2081	CV56|CV56_2033	KLDS|KLDS_2202	LMG14418|LMG14418_1565	P7266|P7266_1559	44	1
OG_1153	Ribulose-phosphate 3-epimerase (EC 5.1.3.1)	A76|A76_2223	UC509_9|UC5099_2002	FG2|FG2_2613	HP|HP_0246	LMG6897|LMG6897_0008	B40|B40_0736	SK11|SK11_2219	AM2|AM2_1867	SK110|SK110_1652	KW10|KW10_0349	KW2|KW2_1980	MG1363|MG1363_2270	NCDO763|NCDO763_0620	N41|N41_1469	V4|V4_0898	LMG8520|LMG8520_0008	IO_1|IO1_2013	LMG8526|LMG8526_0184	KF147|KF147_2180	KF282|KF282_0175	E34|E34_2131	KF201|KF201_1751	M20|M20_2395	ATCC19435|ATCC19435_1599	KF7|KF7_1233	LMG9449|LMG9449_0019	K231|K231_0196	K337|K337_1197	KF24|KF24_0148	Li1|Li1_0167	N42|N42_2278	ML8|ML8_0922	UC317|UC317_2357	KF67|KF67_1481	LMG9446|LMG9446_1276	KF146|KF146_1067	KF134|KF134_1884	KF196|KF196_1212	DRA4|DRA4_0509	IL1403|IL1403_2082	CV56|CV56_2034	KLDS|KLDS_2203	LMG14418|LMG14418_1566	P7266|P7266_1560	44	1
OG_1154	FIG00755545: hypothetical protein	A76|A76_2224	UC509_9|UC5099_2003	FG2|FG2_2612	HP|HP_0245	LMG6897|LMG6897_0007	B40|B40_0735	SK11|SK11_2220	AM2|AM2_1868	SK110|SK110_1651	KW10|KW10_0350	KW2|KW2_1981	MG1363|MG1363_2271	NCDO763|NCDO763_0619	N41|N41_1468	V4|V4_0899	LMG8520|LMG8520_0009	IO_1|IO1_2014	LMG8526|LMG8526_0185	KF147|KF147_2181	KF282|KF282_0176	E34|E34_2130	KF201|KF201_1752	M20|M20_2396	ATCC19435|ATCC19435_1600	KF7|KF7_1234	LMG9449|LMG9449_0020	K231|K231_0197	K337|K337_1198	KF24|KF24_0149	Li1|Li1_0168	N42|N42_2279	ML8|ML8_0923	UC317|UC317_2358	KF67|KF67_1482	LMG9446|LMG9446_1277	KF146|KF146_1068	KF134|KF134_1885	KF196|KF196_1213	DRA4|DRA4_0508	IL1403|IL1403_2083	CV56|CV56_2035	KLDS|KLDS_2204	LMG14418|LMG14418_1567	P7266|P7266_1562	44	1
OG_1155	FIG00755305: hypothetical protein	A76|A76_2225	UC509_9|UC5099_2004	FG2|FG2_2611	HP|HP_0244	LMG6897|LMG6897_0006	B40|B40_0734	SK11|SK11_2221	AM2|AM2_1869	SK110|SK110_1650	KW10|KW10_0351	KW2|KW2_1982	MG1363|MG1363_2272	NCDO763|NCDO763_0618	N41|N41_1467	V4|V4_0900	LMG8520|LMG8520_0010	IO_1|IO1_2015	LMG8526|LMG8526_0186	KF147|KF147_2182	KF282|KF282_0177	E34|E34_2129	KF201|KF201_1753	M20|M20_2397	ATCC19435|ATCC19435_1601	KF7|KF7_1235	LMG9449|LMG9449_0021	K231|K231_0198	K337|K337_1199	KF24|KF24_0150	Li1|Li1_0169	N42|N42_2280	ML8|ML8_0924	UC317|UC317_2359	KF67|KF67_1483	LMG9446|LMG9446_1278	KF146|KF146_1069	KF134|KF134_1886	KF196|KF196_1214	DRA4|DRA4_0507	IL1403|IL1403_2084	CV56|CV56_2036	KLDS|KLDS_2205	LMG14418|LMG14418_1568	P7266|P7266_1563	44	1
OG_1156	Ribosome small subunit-stimulated GTPase EngC	A76|A76_2226	UC509_9|UC5099_2005	FG2|FG2_2610	HP|HP_0243	LMG6897|LMG6897_0005	B40|B40_0733	SK11|SK11_2222	AM2|AM2_1870	SK110|SK110_1649	KW10|KW10_0352	KW2|KW2_1983	MG1363|MG1363_2273	NCDO763|NCDO763_0617	N41|N41_1466	V4|V4_0901	LMG8520|LMG8520_0011	IO_1|IO1_2016	LMG8526|LMG8526_0187	KF147|KF147_2183	KF282|KF282_0178	E34|E34_2128	KF201|KF201_1754	M20|M20_2398	ATCC19435|ATCC19435_1602	KF7|KF7_1236	LMG9449|LMG9449_0022	K231|K231_0199	K337|K337_1200	KF24|KF24_0151	Li1|Li1_0170	N42|N42_2281	ML8|ML8_0925	UC317|UC317_2360	KF67|KF67_1484	LMG9446|LMG9446_1279	KF146|KF146_1070	KF134|KF134_1887	KF196|KF196_1215	DRA4|DRA4_0506	IL1403|IL1403_2085	CV56|CV56_2037	KLDS|KLDS_2206	LMG14418|LMG14418_1569	P7266|P7266_1564	44	1
OG_1157	Phenylalanyl-tRNA synthetase beta chain (EC6.1.1.20)	A76|A76_2228	UC509_9|UC5099_2007	FG2|FG2_2608	HP|HP_0241	LMG6897|LMG6897_0003	B40|B40_0731	SK11|SK11_2224	AM2|AM2_1872	SK110|SK110_1647	KW10|KW10_0355	KW2|KW2_1985	MG1363|MG1363_2275	NCDO763|NCDO763_0615	N41|N41_1464	V4|V4_0903	LMG8520|LMG8520_0013	IO_1|IO1_2018	LMG8526|LMG8526_0189	KF147|KF147_2185	KF282|KF282_0180	E34|E34_2126	KF201|KF201_1756	M20|M20_2400	ATCC19435|ATCC19435_1605	KF7|KF7_1238	LMG9449|LMG9449_0024	K231|K231_0201	K337|K337_1202	KF24|KF24_0153	Li1|Li1_0172	N42|N42_2283	ML8|ML8_0927	UC317|UC317_2362	KF67|KF67_1486	LMG9446|LMG9446_1281	KF146|KF146_1072	KF134|KF134_1890	KF196|KF196_1217	DRA4|DRA4_0504	IL1403|IL1403_2087	CV56|CV56_2039	KLDS|KLDS_2208	LMG14418|LMG14418_1571	P7266|P7266_1566	44	1
OG_1158	Phenylalanyl-tRNA synthetase alpha chain (EC6.1.1.20)	A76|A76_2229	UC509_9|UC5099_2008	FG2|FG2_2607	HP|HP_0240	LMG6897|LMG6897_0002	B40|B40_0730	SK11|SK11_2225	AM2|AM2_1873	SK110|SK110_1646	KW10|KW10_0357	KW2|KW2_1986	MG1363|MG1363_2276	NCDO763|NCDO763_0614	N41|N41_1463	V4|V4_0904	LMG8520|LMG8520_0014	IO_1|IO1_2019	LMG8526|LMG8526_0190	KF147|KF147_2186	KF282|KF282_0181	E34|E34_2125	KF201|KF201_1757	M20|M20_2401	ATCC19435|ATCC19435_1606	KF7|KF7_1239	LMG9449|LMG9449_0025	K231|K231_0202	K337|K337_1203	KF24|KF24_0154	Li1|Li1_0173	N42|N42_2284	ML8|ML8_0928	UC317|UC317_2363	KF67|KF67_1487	LMG9446|LMG9446_1282	KF146|KF146_1073	KF134|KF134_1891	KF196|KF196_1218	DRA4|DRA4_0503	IL1403|IL1403_2088	CV56|CV56_2040	KLDS|KLDS_2209	LMG14418|LMG14418_1572	P7266|P7266_1567	44	1
OG_1159	FIG053235: Diacylglucosamine hydrolase like	A76|A76_1524	UC509_9|UC5099_1463	FG2|FG2_2650	HP|HP_2028	LMG6897|LMG6897_0330	B40|B40_1430	SK11|SK11_1523	AM2|AM2_1325	SK110|SK110_2173	KW10|KW10_2218	KW2|KW2_1352	MG1363|MG1363_1128	NCDO763|NCDO763_2405	N41|N41_0476	V4|V4_0847	LMG8520|LMG8520_1281	IO_1|IO1_1399	LMG8526|LMG8526_1135	KF147|KF147_1504	KF282|KF282_2580	E34|E34_0406	KF201|KF201_2234	M20|M20_2454	ATCC19435|ATCC19435_0364	KF7|KF7_0467	LMG9449|LMG9449_1471	K231|K231_2034	K337|K337_2116	KF24|KF24_0482	Li1|Li1_1282	N42|N42_2098	ML8|ML8_2219	UC317|UC317_1194	KF67|KF67_0851	LMG9446|LMG9446_0066	KF146|KF146_0470	KF134|KF134_1585	KF196|KF196_0918	DRA4|DRA4_2205	IL1403|IL1403_1485	CV56|CV56_1416	KLDS|KLDS_1527	LMG14418|LMG14418_0728	P7266|P7266_1456	44	1
OG_116	conserved hypothetical protein	A76|A76_2085	UC509_9|UC5099_0540	FG2|FG2_1944 FG2|FG2_1945	HP|HP_2481 HP|HP_2480	LMG6897|LMG6897_1370 LMG6897|LMG6897_1369	B40|B40_0004	SK11|SK11_0528	AM2|AM2_0424	SK110|SK110_2336	KW10|KW10_1339	KW2|KW2_0468	MG1363|MG1363_0515	NCDO763|NCDO763_0127	N41|N41_1160	V4|V4_2143	LMG8520|LMG8520_1743	IO_1|IO1_0443	LMG8526|LMG8526_2278	KF147|KF147_0525 KF147|KF147_0526	KF282|KF282_0685	E34|E34_1172	KF201|KF201_0390	M20|M20_1994 M20|M20_1995	ATCC19435|ATCC19435_1159	KF7|KF7_2064	LMG9449|LMG9449_0934	K231|K231_1388		KF24|KF24_0625	Li1|Li1_2192	N42|N42_2476	ML8|ML8_1866	UC317|UC317_1471	KF67|KF67_1688	LMG9446|LMG9446_0613	KF146|KF146_2335 KF146|KF146_2336	KF134|KF134_0876	KF196|KF196_0371 KF196|KF196_0372	DRA4|DRA4_1672	IL1403|IL1403_0572	CV56|CV56_0489	KLDS|KLDS_0571	LMG14418|LMG14418_0422		42	FALSE
OG_1160	N-acetylmuramoyl-L-alanine amidase (EC3.5.1.28)	A76|A76_1522	UC509_9|UC5099_1461	FG2|FG2_2652	HP|HP_2030	LMG6897|LMG6897_0332	B40|B40_1432	SK11|SK11_1521	AM2|AM2_1323	SK110|SK110_2175	KW10|KW10_2216	KW2|KW2_1350	MG1363|MG1363_1130	NCDO763|NCDO763_2407	N41|N41_0478	V4|V4_0849	LMG8520|LMG8520_1283	IO_1|IO1_1397	LMG8526|LMG8526_1137	KF147|KF147_1502	KF282|KF282_2582	E34|E34_0404	KF201|KF201_2232	M20|M20_2456	ATCC19435|ATCC19435_0362	KF7|KF7_0465	LMG9449|LMG9449_1469	K231|K231_2036	K337|K337_2118	KF24|KF24_0480	Li1|Li1_1284	N42|N42_2096	ML8|ML8_2221	UC317|UC317_1196	KF67|KF67_0849	LMG9446|LMG9446_0064	KF146|KF146_0472	KF134|KF134_1587	KF196|KF196_0916	DRA4|DRA4_2203	IL1403|IL1403_1483	CV56|CV56_1414	KLDS|KLDS_1525	LMG14418|LMG14418_0730	P7266|P7266_1453	44	1
OG_1161	Glutathione peroxidase family protein	A76|A76_1520	UC509_9|UC5099_1459	FG2|FG2_2654	HP|HP_2032	LMG6897|LMG6897_0334	B40|B40_1434	SK11|SK11_1519	AM2|AM2_1322	SK110|SK110_2177	KW10|KW10_2215	KW2|KW2_1349	MG1363|MG1363_1131	NCDO763|NCDO763_2408	N41|N41_0479	V4|V4_0850	LMG8520|LMG8520_1284	IO_1|IO1_1396	LMG8526|LMG8526_1138	KF147|KF147_1501	KF282|KF282_2583	E34|E34_0403	KF201|KF201_2231	M20|M20_2457	ATCC19435|ATCC19435_0361	KF7|KF7_0464	LMG9449|LMG9449_1468	K231|K231_2037	K337|K337_2119	KF24|KF24_0479	Li1|Li1_1285	N42|N42_2095	ML8|ML8_2222	UC317|UC317_1197	KF67|KF67_0848	LMG9446|LMG9446_0063	KF146|KF146_0473	KF134|KF134_1588	KF196|KF196_0915	DRA4|DRA4_2201	IL1403|IL1403_1482	CV56|CV56_1413	KLDS|KLDS_1524	LMG14418|LMG14418_0731	P7266|P7266_1452	44	1
OG_1162	Carbamoyl-phosphate synthase large chain (EC6.3.5.5)	A76|A76_1519	UC509_9|UC5099_1458	FG2|FG2_2655	HP|HP_2033	LMG6897|LMG6897_0335	B40|B40_1435	SK11|SK11_1518	AM2|AM2_1321	SK110|SK110_2178	KW10|KW10_2214	KW2|KW2_1348	MG1363|MG1363_1132	NCDO763|NCDO763_2409	N41|N41_0480	V4|V4_0851	LMG8520|LMG8520_1285	IO_1|IO1_1395	LMG8526|LMG8526_1139	KF147|KF147_1500	KF282|KF282_2584	E34|E34_0402	KF201|KF201_2230	M20|M20_2458	ATCC19435|ATCC19435_0360	KF7|KF7_0463	LMG9449|LMG9449_1467	K231|K231_2038	K337|K337_2120	KF24|KF24_0478	Li1|Li1_1286	N42|N42_2094	ML8|ML8_1688	UC317|UC317_1198	KF67|KF67_0847	LMG9446|LMG9446_0062	KF146|KF146_0474	KF134|KF134_1589	KF196|KF196_0914	DRA4|DRA4_2200	IL1403|IL1403_1481	CV56|CV56_1412	KLDS|KLDS_1523	LMG14418|LMG14418_0732	P7266|P7266_1450	44	1
OG_1163	FIG00756202: hypothetical protein	A76|A76_1498	UC509_9|UC5099_1446	FG2|FG2_2666	HP|HP_2044	LMG6897|LMG6897_0346	B40|B40_2284	SK11|SK11_1504	AM2|AM2_1313	SK110|SK110_0762	KW10|KW10_2203	KW2|KW2_1337	MG1363|MG1363_1144	NCDO763|NCDO763_2421	N41|N41_0494	V4|V4_0863	LMG8520|LMG8520_2083	IO_1|IO1_1387	LMG8526|LMG8526_1141	KF147|KF147_1498	KF282|KF282_2595	E34|E34_0394	KF201|KF201_2222	M20|M20_2460	ATCC19435|ATCC19435_0358	KF7|KF7_0461	LMG9449|LMG9449_1465	K231|K231_2040	K337|K337_2122	KF24|KF24_0476	Li1|Li1_1288	N42|N42_2085	ML8|ML8_1680	UC317|UC317_1206	KF67|KF67_0845	LMG9446|LMG9446_0060	KF146|KF146_0476	KF134|KF134_1591	KF196|KF196_0912	DRA4|DRA4_0807	IL1403|IL1403_1469	CV56|CV56_1403	KLDS|KLDS_1514	LMG14418|LMG14418_1746	P7266|P7266_1443	44	1
OG_1164	Primosomal protein N' (replication factor Y) -superfamily II helicase	A76|A76_1497	UC509_9|UC5099_1445	FG2|FG2_2667	HP|HP_2045	LMG6897|LMG6897_0347	B40|B40_2285	SK11|SK11_1503	AM2|AM2_1312	SK110|SK110_0763	KW10|KW10_2202	KW2|KW2_1336	MG1363|MG1363_1145	NCDO763|NCDO763_2422	N41|N41_0495	V4|V4_0864	LMG8520|LMG8520_2082	IO_1|IO1_1386	LMG8526|LMG8526_1142	KF147|KF147_1497	KF282|KF282_2596	E34|E34_0393	KF201|KF201_2221	M20|M20_2461	ATCC19435|ATCC19435_0357	KF7|KF7_0460	LMG9449|LMG9449_1464	K231|K231_2041	K337|K337_2123	KF24|KF24_0475	Li1|Li1_1289	N42|N42_2084	ML8|ML8_1679	UC317|UC317_1207	KF67|KF67_0844	LMG9446|LMG9446_0059	KF146|KF146_0477	KF134|KF134_1592	KF196|KF196_0911	DRA4|DRA4_0808	IL1403|IL1403_1468	CV56|CV56_1402	KLDS|KLDS_1513	LMG14418|LMG14418_1747	P7266|P7266_1442	44	1
OG_1165	Putative virion core protein (lumpy skindisease virus)	A76|A76_1496	UC509_9|UC5099_1444	FG2|FG2_2668	HP|HP_2046	LMG6897|LMG6897_0348	B40|B40_2286	SK11|SK11_1502	AM2|AM2_1311	SK110|SK110_0764	KW10|KW10_2201	KW2|KW2_1335	MG1363|MG1363_1146	NCDO763|NCDO763_2423	N41|N41_0496	V4|V4_0865	LMG8520|LMG8520_2081	IO_1|IO1_1385	LMG8526|LMG8526_1143	KF147|KF147_1496	KF282|KF282_2597	E34|E34_0392	KF201|KF201_2220	M20|M20_2462	ATCC19435|ATCC19435_0356	KF7|KF7_0459	LMG9449|LMG9449_1463	K231|K231_2042	K337|K337_2124	KF24|KF24_0474	Li1|Li1_1290	N42|N42_2083	ML8|ML8_1678	UC317|UC317_1208	KF67|KF67_0843	LMG9446|LMG9446_0058	KF146|KF146_0478	KF134|KF134_1593	KF196|KF196_0910	DRA4|DRA4_0809	IL1403|IL1403_1467	CV56|CV56_1401	KLDS|KLDS_1512	LMG14418|LMG14418_1748	P7266|P7266_1441	44	1
OG_1166	Multidrug resistance protein B	A76|A76_1485	UC509_9|UC5099_1433	FG2|FG2_1408	HP|HP_1366	LMG6897|LMG6897_1591	B40|B40_2545	SK11|SK11_1491	AM2|AM2_1310	SK110|SK110_0775	KW10|KW10_2191	KW2|KW2_1325	MG1363|MG1363_1147	NCDO763|NCDO763_2424	N41|N41_0497	V4|V4_2200	LMG8520|LMG8520_2068	IO_1|IO1_1384	LMG8526|LMG8526_1152	KF147|KF147_1487	KF282|KF282_2606	E34|E34_0383	KF201|KF201_2219	M20|M20_2471	ATCC19435|ATCC19435_0355	KF7|KF7_0450	LMG9449|LMG9449_1452	K231|K231_2043	K337|K337_2125	KF24|KF24_0464	Li1|Li1_1299	N42|N42_2082	ML8|ML8_1677	UC317|UC317_1209	KF67|KF67_0834	LMG9446|LMG9446_0049	KF146|KF146_0487	KF134|KF134_1602	KF196|KF196_0901	DRA4|DRA4_0820	IL1403|IL1403_1466	CV56|CV56_1400	KLDS|KLDS_1511	LMG14418|LMG14418_1749	P7266|P7266_0021	44	1
OG_1167	Chromosome replication initiation protein dnaD	A76|A76_1175	UC509_9|UC5099_1124	FG2|FG2_0450	HP|HP_0316	LMG6897|LMG6897_1318	B40|B40_2343	SK11|SK11_1172	AM2|AM2_2042	SK110|SK110_0259	KW10|KW10_2116	KW2|KW2_1002	MG1363|MG1363_1553	NCDO763|NCDO763_0216	N41|N41_2493	V4|V4_1907	LMG8520|LMG8520_1456	IO_1|IO1_1017	LMG8526|LMG8526_1513	KF147|KF147_1140	KF282|KF282_2101	E34|E34_0018	KF201|KF201_1541	M20|M20_2475	ATCC19435|ATCC19435_2309	KF7|KF7_1577	LMG9449|LMG9449_1802	K231|K231_0498	K337|K337_1579	KF24|KF24_1582	Li1|Li1_0564	N42|N42_1103	ML8|ML8_0055	UC317|UC317_2246	KF67|KF67_0518	LMG9446|LMG9446_0276	KF146|KF146_1384	KF134|KF134_0219	KF196|KF196_0550	DRA4|DRA4_2556	IL1403|IL1403_1159	CV56|CV56_1117	KLDS|KLDS_1130	LMG14418|LMG14418_0640	P7266|P7266_0241	44	1
OG_1168	Endonuclease III (EC 4.2.99.18)	A76|A76_1176	UC509_9|UC5099_1125	FG2|FG2_0451	HP|HP_0317	LMG6897|LMG6897_1319	B40|B40_2344	SK11|SK11_1173	AM2|AM2_2041	SK110|SK110_0260	KW10|KW10_2117	KW2|KW2_1003	MG1363|MG1363_1552	NCDO763|NCDO763_0215	N41|N41_2494	V4|V4_1906	LMG8520|LMG8520_1457	IO_1|IO1_1018	LMG8526|LMG8526_1514	KF147|KF147_1141	KF282|KF282_2100	E34|E34_0019	KF201|KF201_1540	M20|M20_2476	ATCC19435|ATCC19435_2308	KF7|KF7_1578	LMG9449|LMG9449_1801	K231|K231_0497	K337|K337_1578	KF24|KF24_1583	Li1|Li1_0565	N42|N42_1104	ML8|ML8_0054	UC317|UC317_2245	KF67|KF67_0517	LMG9446|LMG9446_0277	KF146|KF146_1385	KF134|KF134_0218	KF196|KF196_0551	DRA4|DRA4_2557	IL1403|IL1403_1160	CV56|CV56_1118	KLDS|KLDS_1131	LMG14418|LMG14418_0639	P7266|P7266_0242	44	1
OG_1169	Putative tRNA-m1A22 methylase	A76|A76_1177	UC509_9|UC5099_1126	FG2|FG2_0452	HP|HP_0318	LMG6897|LMG6897_1320	B40|B40_2345	SK11|SK11_1174	AM2|AM2_2040	SK110|SK110_0261	KW10|KW10_2118	KW2|KW2_1004	MG1363|MG1363_1551	NCDO763|NCDO763_0214	N41|N41_2495	V4|V4_1905	LMG8520|LMG8520_1458	IO_1|IO1_1019	LMG8526|LMG8526_1515	KF147|KF147_1142	KF282|KF282_2099	E34|E34_0020	KF201|KF201_1539	M20|M20_2477	ATCC19435|ATCC19435_2307	KF7|KF7_1579	LMG9449|LMG9449_1800	K231|K231_0496	K337|K337_1577	KF24|KF24_1584	Li1|Li1_0566	N42|N42_1105	ML8|ML8_0053	UC317|UC317_2244	KF67|KF67_0516	LMG9446|LMG9446_0278	KF146|KF146_1386	KF134|KF134_0217	KF196|KF196_0552	DRA4|DRA4_2558	IL1403|IL1403_1161	CV56|CV56_1119	KLDS|KLDS_1132	LMG14418|LMG14418_0638	P7266|P7266_0243	44	1
OG_117	Dolichol-phosphate mannosyltransferase (EC2.4.1.83) in lipid-linked oligosaccharide synthesiscluster	A76|A76_1662	UC509_9|UC5099_0959	FG2|FG2_0395	HP|HP_1158	LMG6897|LMG6897_1605	B40|B40_1509	SK11|SK11_0942	AM2|AM2_1467	SK110|SK110_0380	KW10|KW10_0677	KW2|KW2_0832	MG1363|MG1363_1727	NCDO763|NCDO763_1483	N41|N41_1818	V4|V4_1009 V4|V4_1010	LMG8520|LMG8520_1697 LMG8520|LMG8520_1696	IO_1|IO1_0848	LMG8526|LMG8526_1029	KF147|KF147_0926	KF282|KF282_2259	E34|E34_1795	KF201|KF201_1686	M20|M20_2611	ATCC19435|ATCC19435_1340 ATCC19435|ATCC19435_1339	KF7|KF7_1436	LMG9449|LMG9449_2489		K337|K337_1728	KF24|KF24_0674 KF24|KF24_0673	Li1|Li1_0425	N42|N42_0959 N42|N42_0958	ML8|ML8_2490	UC317|UC317_1157	KF67|KF67_0894	LMG9446|LMG9446_0143	KF146|KF146_1246	KF134|KF134_0351	KF196|KF196_0417	DRA4|DRA4_0377	IL1403|IL1403_0944	CV56|CV56_0899	KLDS|KLDS_0912	LMG14418|LMG14418_2263	P7266|P7266_1336	43	FALSE
OG_1170	UPF0135 protein Bsu YqfO	A76|A76_1178	UC509_9|UC5099_1127	FG2|FG2_0453	HP|HP_0319	LMG6897|LMG6897_1321	B40|B40_2346	SK11|SK11_1175	AM2|AM2_2039	SK110|SK110_0262	KW10|KW10_2119	KW2|KW2_1005	MG1363|MG1363_1550	NCDO763|NCDO763_0213	N41|N41_2496	V4|V4_1904	LMG8520|LMG8520_1459	IO_1|IO1_1020	LMG8526|LMG8526_1516	KF147|KF147_1143	KF282|KF282_2098	E34|E34_0021	KF201|KF201_1538	M20|M20_2478	ATCC19435|ATCC19435_2306	KF7|KF7_1580	LMG9449|LMG9449_1799	K231|K231_0495	K337|K337_1576	KF24|KF24_1585	Li1|Li1_0567	N42|N42_1106	ML8|ML8_0052	UC317|UC317_2243	KF67|KF67_0515	LMG9446|LMG9446_0279	KF146|KF146_1387	KF134|KF134_0216	KF196|KF196_0553	DRA4|DRA4_2559	IL1403|IL1403_1162	CV56|CV56_1120	KLDS|KLDS_1133	LMG14418|LMG14418_0637	P7266|P7266_0244	44	1
OG_1171	Deoxyguanosinetriphosphate triphosphohydrolase(EC 3.1.5.1)	A76|A76_1181	UC509_9|UC5099_1130	FG2|FG2_0456	HP|HP_0322	LMG6897|LMG6897_1324	B40|B40_2349	SK11|SK11_1178	AM2|AM2_2036	SK110|SK110_0265	KW10|KW10_2122	KW2|KW2_1008	MG1363|MG1363_1547	NCDO763|NCDO763_0210	N41|N41_2499	V4|V4_1901	LMG8520|LMG8520_0175	IO_1|IO1_1023	LMG8526|LMG8526_1519	KF147|KF147_1146	KF282|KF282_2095	E34|E34_0024	KF201|KF201_1535	M20|M20_2481	ATCC19435|ATCC19435_2303	KF7|KF7_1583	LMG9449|LMG9449_1796	K231|K231_0492	K337|K337_1573	KF24|KF24_1588	Li1|Li1_0570	N42|N42_1109	ML8|ML8_0049	UC317|UC317_2240	KF67|KF67_0512	LMG9446|LMG9446_0282	KF146|KF146_1390	KF134|KF134_0213	KF196|KF196_0556	DRA4|DRA4_2562	IL1403|IL1403_1165	CV56|CV56_1123	KLDS|KLDS_1136	LMG14418|LMG14418_0634	P7266|P7266_0247	44	1
OG_1172	FIG00755454: hypothetical protein	A76|A76_1182	UC509_9|UC5099_1131	FG2|FG2_0457	HP|HP_0323	LMG6897|LMG6897_1325	B40|B40_2093	SK11|SK11_1179	AM2|AM2_2035	SK110|SK110_0266	KW10|KW10_2123	KW2|KW2_1009	MG1363|MG1363_1546	NCDO763|NCDO763_0209	N41|N41_2500	V4|V4_1900	LMG8520|LMG8520_0176	IO_1|IO1_1024	LMG8526|LMG8526_1520	KF147|KF147_1147	KF282|KF282_2094	E34|E34_0025	KF201|KF201_1534	M20|M20_2482	ATCC19435|ATCC19435_2302	KF7|KF7_1584	LMG9449|LMG9449_1795	K231|K231_0491	K337|K337_1572	KF24|KF24_1589	Li1|Li1_0571	N42|N42_1110	ML8|ML8_0048	UC317|UC317_2239	KF67|KF67_0511	LMG9446|LMG9446_0283	KF146|KF146_1391	KF134|KF134_0212	KF196|KF196_0557	DRA4|DRA4_2563	IL1403|IL1403_1166	CV56|CV56_1124	KLDS|KLDS_1137	LMG14418|LMG14418_0633	P7266|P7266_0248	44	1
OG_1173	ABC transporter, permease protein (putative)	A76|A76_1183	UC509_9|UC5099_1132	FG2|FG2_0458	HP|HP_0324	LMG6897|LMG6897_1326	B40|B40_2092	SK11|SK11_1180	AM2|AM2_2034	SK110|SK110_0267	KW10|KW10_2124	KW2|KW2_1010	MG1363|MG1363_1545	NCDO763|NCDO763_0208	N41|N41_2501	V4|V4_1899	LMG8520|LMG8520_0177	IO_1|IO1_1025	LMG8526|LMG8526_1521	KF147|KF147_1148	KF282|KF282_2093	E34|E34_0026	KF201|KF201_1533	M20|M20_2483	ATCC19435|ATCC19435_2301	KF7|KF7_1585	LMG9449|LMG9449_1794	K231|K231_0490	K337|K337_1571	KF24|KF24_1590	Li1|Li1_0572	N42|N42_1111	ML8|ML8_0047	UC317|UC317_2238	KF67|KF67_0510	LMG9446|LMG9446_0284	KF146|KF146_1392	KF134|KF134_0211	KF196|KF196_0558	DRA4|DRA4_2564	IL1403|IL1403_1167	CV56|CV56_1125	KLDS|KLDS_1138	LMG14418|LMG14418_0632	P7266|P7266_0249	44	1
OG_1174	LSU ribosomal protein L21p	A76|A76_1184	UC509_9|UC5099_1133	FG2|FG2_0459	HP|HP_0325	LMG6897|LMG6897_1327	B40|B40_2091	SK11|SK11_1181	AM2|AM2_2033	SK110|SK110_0268	KW10|KW10_2125	KW2|KW2_1011	MG1363|MG1363_1544	NCDO763|NCDO763_0207	N41|N41_2502	V4|V4_1898	LMG8520|LMG8520_0178	IO_1|IO1_1026	LMG8526|LMG8526_1522	KF147|KF147_1149	KF282|KF282_2092	E34|E34_0027	KF201|KF201_1532	M20|M20_2484	ATCC19435|ATCC19435_2300	KF7|KF7_1586	LMG9449|LMG9449_1793	K231|K231_0489	K337|K337_1570	KF24|KF24_1591	Li1|Li1_0573	N42|N42_1112	ML8|ML8_0046	UC317|UC317_2237	KF67|KF67_0509	LMG9446|LMG9446_0285	KF146|KF146_1393	KF134|KF134_0210	KF196|KF196_0559	DRA4|DRA4_2565	IL1403|IL1403_1168	CV56|CV56_1126	KLDS|KLDS_1139	LMG14418|LMG14418_0631	P7266|P7266_0250	44	1
OG_1175	FIG139598: Potential ribosomal protein	A76|A76_1185	UC509_9|UC5099_1134	FG2|FG2_0460	HP|HP_0326	LMG6897|LMG6897_1328	B40|B40_2090	SK11|SK11_1182	AM2|AM2_2032	SK110|SK110_0269	KW10|KW10_2126	KW2|KW2_1012	MG1363|MG1363_1543	NCDO763|NCDO763_0206	N41|N41_2503	V4|V4_1897	LMG8520|LMG8520_0179	IO_1|IO1_1027	LMG8526|LMG8526_1523	KF147|KF147_1150	KF282|KF282_2091	E34|E34_0028	KF201|KF201_1531	M20|M20_2485	ATCC19435|ATCC19435_2299	KF7|KF7_1587	LMG9449|LMG9449_1792	K231|K231_0488	K337|K337_1569	KF24|KF24_1592	Li1|Li1_0574	N42|N42_1113	ML8|ML8_0045	UC317|UC317_2236	KF67|KF67_0508	LMG9446|LMG9446_0286	KF146|KF146_1394	KF134|KF134_0209	KF196|KF196_0560	DRA4|DRA4_2566	IL1403|IL1403_1169	CV56|CV56_1127	KLDS|KLDS_1140	LMG14418|LMG14418_0630	P7266|P7266_0251	44	1
OG_1176	LSU ribosomal protein L27p	A76|A76_1186	UC509_9|UC5099_1135	FG2|FG2_0461	HP|HP_0327	LMG6897|LMG6897_1329	B40|B40_2089	SK11|SK11_1183	AM2|AM2_2031	SK110|SK110_0270	KW10|KW10_2127	KW2|KW2_1013	MG1363|MG1363_1542	NCDO763|NCDO763_0205	N41|N41_2504	V4|V4_1896	LMG8520|LMG8520_0180	IO_1|IO1_1028	LMG8526|LMG8526_1524	KF147|KF147_1151	KF282|KF282_2090	E34|E34_0029	KF201|KF201_1530	M20|M20_2486	ATCC19435|ATCC19435_2298	KF7|KF7_1588	LMG9449|LMG9449_1791	K231|K231_0487	K337|K337_1568	KF24|KF24_1593	Li1|Li1_0575	N42|N42_1114	ML8|ML8_0044	UC317|UC317_2235	KF67|KF67_0507	LMG9446|LMG9446_0287	KF146|KF146_1395	KF134|KF134_0208	KF196|KF196_0561	DRA4|DRA4_2567	IL1403|IL1403_1170	CV56|CV56_1128	KLDS|KLDS_1141	LMG14418|LMG14418_0629	P7266|P7266_0252	44	1
OG_1177	Phosphate starvation-inducible protein PhoH,predicted ATPase	A76|A76_1189	UC509_9|UC5099_1137	FG2|FG2_0463	HP|HP_0329	LMG6897|LMG6897_1331	B40|B40_2087	SK11|SK11_1185	AM2|AM2_2029	SK110|SK110_0272	KW10|KW10_2129	KW2|KW2_1015	MG1363|MG1363_1540	NCDO763|NCDO763_0203	N41|N41_2506	V4|V4_1894	LMG8520|LMG8520_0182	IO_1|IO1_1030	LMG8526|LMG8526_1526	KF147|KF147_1153	KF282|KF282_2088	E34|E34_0031	KF201|KF201_1528	M20|M20_2488	ATCC19435|ATCC19435_2296	KF7|KF7_1590	LMG9449|LMG9449_1789	K231|K231_0485	K337|K337_1566	KF24|KF24_1595	Li1|Li1_0577	N42|N42_1116	ML8|ML8_0042	UC317|UC317_2233	KF67|KF67_0505	LMG9446|LMG9446_0289	KF146|KF146_1397	KF134|KF134_0206	KF196|KF196_0563	DRA4|DRA4_2569	IL1403|IL1403_1173	CV56|CV56_1130	KLDS|KLDS_1143	LMG14418|LMG14418_0932	P7266|P7266_0253	44	1
OG_1178	Metal-dependent hydrolase YbeY, involved inrRNA and/or ribosome maturation and assembly	A76|A76_1191	UC509_9|UC5099_1139	FG2|FG2_0465	HP|HP_0331	LMG6897|LMG6897_1333	B40|B40_2085	SK11|SK11_1187	AM2|AM2_2027	SK110|SK110_0274	KW10|KW10_2132	KW2|KW2_1017	MG1363|MG1363_1538	NCDO763|NCDO763_0201	N41|N41_2508	V4|V4_1892	LMG8520|LMG8520_0184	IO_1|IO1_1032	LMG8526|LMG8526_1528	KF147|KF147_1155	KF282|KF282_2086	E34|E34_0033	KF201|KF201_1526	M20|M20_2490	ATCC19435|ATCC19435_2294	KF7|KF7_1592	LMG9449|LMG9449_1787	K231|K231_0483	K337|K337_1564	KF24|KF24_1597	Li1|Li1_0579	N42|N42_1118	ML8|ML8_0040	UC317|UC317_2231	KF67|KF67_0503	LMG9446|LMG9446_0291	KF146|KF146_1399	KF134|KF134_0203	KF196|KF196_0565	DRA4|DRA4_2571	IL1403|IL1403_1175	CV56|CV56_1132	KLDS|KLDS_1145	LMG14418|LMG14418_0934	P7266|P7266_0254	44	1
OG_1179	Diacylglycerol kinase (EC 2.7.1.107)	A76|A76_1192	UC509_9|UC5099_1140	FG2|FG2_0466	HP|HP_0332	LMG6897|LMG6897_1334	B40|B40_2084	SK11|SK11_1188	AM2|AM2_2026	SK110|SK110_0275	KW10|KW10_2133	KW2|KW2_1018	MG1363|MG1363_1537	NCDO763|NCDO763_0200	N41|N41_2509	V4|V4_1891	LMG8520|LMG8520_0185	IO_1|IO1_1033	LMG8526|LMG8526_1529	KF147|KF147_1156	KF282|KF282_2085	E34|E34_0034	KF201|KF201_1525	M20|M20_2491	ATCC19435|ATCC19435_2293	KF7|KF7_1593	LMG9449|LMG9449_1786	K231|K231_0482	K337|K337_1563	KF24|KF24_1598	Li1|Li1_0580	N42|N42_1119	ML8|ML8_0039	UC317|UC317_2230	KF67|KF67_0502	LMG9446|LMG9446_0292	KF146|KF146_1400	KF134|KF134_0202	KF196|KF196_0566	DRA4|DRA4_2572	IL1403|IL1403_1176	CV56|CV56_1133	KLDS|KLDS_1146	LMG14418|LMG14418_0935	P7266|P7266_0255	44	1
OG_118	Ribonucleotide reductase of class III(anaerobic), large subunit (EC 1.17.4.2)	A76|A76_2708	UC509_9|UC5099_0281	FG2|FG2_1173	HP|HP_1944	LMG6897|LMG6897_1462	B40|B40_0121	SK11|SK11_0275	AM2|AM2_2356	SK110|SK110_0926	KW10|KW10_1544	KW2|KW2_0256	MG1363|MG1363_0291	NCDO763|NCDO763_1088	N41|N41_0983 N41|N41_1721	V4|V4_1927	LMG8520|LMG8520_1147 LMG8520|LMG8520_1148	IO_1|IO1_0244	LMG8526|LMG8526_0115	KF147|KF147_0278	KF282|KF282_0488	E34|E34_0134	KF201|KF201_0199	M20|M20_0221	ATCC19435|ATCC19435_0984	KF7|KF7_0736	LMG9449|LMG9449_1140	K231|K231_1586	K337|K337_0409	KF24|KF24_1138	Li1|Li1_2004	N42|N42_0205	ML8|ML8_0617	UC317|UC317_0189	KF67|KF67_0278	LMG9446|LMG9446_0911	KF146|KF146_0342	KF134|KF134_1306	KF196|KF196_2287	DRA4|DRA4_0073	IL1403|IL1403_0303	CV56|CV56_0301	KLDS|KLDS_0325	LMG14418|LMG14418_2077	P7266|P7266_0529	44	1
OG_1180	FIG00756444: hypothetical protein	A76|A76_1193	UC509_9|UC5099_1141	FG2|FG2_0467	HP|HP_0333	LMG6897|LMG6897_1335	B40|B40_2083	SK11|SK11_1189	AM2|AM2_2025	SK110|SK110_0276	KW10|KW10_2134	KW2|KW2_1019	MG1363|MG1363_1536	NCDO763|NCDO763_0199	N41|N41_2510	V4|V4_1890	LMG8520|LMG8520_0186	IO_1|IO1_1034	LMG8526|LMG8526_1530	KF147|KF147_1157	KF282|KF282_2084	E34|E34_0035	KF201|KF201_1524	M20|M20_2492	ATCC19435|ATCC19435_2292	KF7|KF7_1594	LMG9449|LMG9449_1785	K231|K231_0481	K337|K337_1562	KF24|KF24_1599	Li1|Li1_0581	N42|N42_1120	ML8|ML8_0038	UC317|UC317_2229	KF67|KF67_0501	LMG9446|LMG9446_0293	KF146|KF146_1401	KF134|KF134_0201	KF196|KF196_0567	DRA4|DRA4_2573	IL1403|IL1403_1177	CV56|CV56_1134	KLDS|KLDS_1147	LMG14418|LMG14418_0936	P7266|P7266_0256	44	1
OG_1181	FIG000605: protein co-occurring with transportsystems (COG1739)	A76|A76_1198	UC509_9|UC5099_1145	FG2|FG2_2026	HP|HP_1529	LMG6897|LMG6897_1533	B40|B40_2079	SK11|SK11_1193	AM2|AM2_2022	SK110|SK110_0280	KW10|KW10_2137	KW2|KW2_1022	MG1363|MG1363_1533	NCDO763|NCDO763_0196	N41|N41_2513	V4|V4_1886	LMG8520|LMG8520_0189	IO_1|IO1_1037	LMG8526|LMG8526_1534	KF147|KF147_1160	KF282|KF282_2081	E34|E34_0038	KF201|KF201_1521	M20|M20_2495	ATCC19435|ATCC19435_2290	KF7|KF7_1597	LMG9449|LMG9449_1782	K231|K231_0478	K337|K337_1558	KF24|KF24_1602	Li1|Li1_0584	N42|N42_1123	ML8|ML8_0035	UC317|UC317_2226	KF67|KF67_0498	LMG9446|LMG9446_0296	KF146|KF146_1404	KF134|KF134_0198	KF196|KF196_0570	DRA4|DRA4_2577	IL1403|IL1403_1180	CV56|CV56_1137	KLDS|KLDS_1149	LMG14418|LMG14418_0938	P7266|P7266_0259	44	1
OG_1182	Glycyl-tRNA synthetase alpha chain (EC6.1.1.14)	A76|A76_1204	UC509_9|UC5099_1150	FG2|FG2_0753	HP|HP_1534	LMG6897|LMG6897_1538	B40|B40_1362	SK11|SK11_1199	AM2|AM2_2018	SK110|SK110_0286	KW10|KW10_2141	KW2|KW2_1027	MG1363|MG1363_1529	NCDO763|NCDO763_0192	N41|N41_2517	V4|V4_1882	LMG8520|LMG8520_0193	IO_1|IO1_1041	LMG8526|LMG8526_1538	KF147|KF147_1164	KF282|KF282_2077	E34|E34_0042	KF201|KF201_1517	M20|M20_2499	ATCC19435|ATCC19435_2286	KF7|KF7_1601	LMG9449|LMG9449_1778	K231|K231_0473	K337|K337_1554	KF24|KF24_1606	Li1|Li1_0588	N42|N42_1127	ML8|ML8_0031	UC317|UC317_2222	KF67|KF67_0494	LMG9446|LMG9446_0300	KF146|KF146_1408	KF134|KF134_0194	KF196|KF196_0574	DRA4|DRA4_2583	IL1403|IL1403_1184	CV56|CV56_1141	KLDS|KLDS_1153	LMG14418|LMG14418_1515	P7266|P7266_0262	44	1
OG_1183	Glycyl-tRNA synthetase beta chain (EC6.1.1.14)	A76|A76_1205	UC509_9|UC5099_1151	FG2|FG2_0754	HP|HP_1535	LMG6897|LMG6897_1539	B40|B40_1363	SK11|SK11_1200	AM2|AM2_2017	SK110|SK110_0287	KW10|KW10_2142	KW2|KW2_1028	MG1363|MG1363_1528	NCDO763|NCDO763_0191	N41|N41_2518	V4|V4_1881	LMG8520|LMG8520_0194	IO_1|IO1_1042	LMG8526|LMG8526_1539	KF147|KF147_1165	KF282|KF282_2076	E34|E34_0043	KF201|KF201_1516	M20|M20_2500	ATCC19435|ATCC19435_2285	KF7|KF7_1602	LMG9449|LMG9449_1777	K231|K231_0472	K337|K337_1553	KF24|KF24_1607	Li1|Li1_0589	N42|N42_1128	ML8|ML8_0030	UC317|UC317_2221	KF67|KF67_0493	LMG9446|LMG9446_0301	KF146|KF146_1409	KF134|KF134_0193	KF196|KF196_0575	DRA4|DRA4_2584	IL1403|IL1403_1185	CV56|CV56_1142	KLDS|KLDS_1154	LMG14418|LMG14418_1516	P7266|P7266_0263	44	1
OG_1184	FIG00755769: hypothetical protein	A76|A76_1206	UC509_9|UC5099_1152	FG2|FG2_0755	HP|HP_1536	LMG6897|LMG6897_1540	B40|B40_1364	SK11|SK11_1201	AM2|AM2_2016	SK110|SK110_0288	KW10|KW10_2143	KW2|KW2_1029	MG1363|MG1363_1527	NCDO763|NCDO763_0190	N41|N41_2519	V4|V4_1880	LMG8520|LMG8520_0195	IO_1|IO1_1043	LMG8526|LMG8526_1540	KF147|KF147_1166	KF282|KF282_2075	E34|E34_0044	KF201|KF201_1515	M20|M20_2501	ATCC19435|ATCC19435_2284	KF7|KF7_1603	LMG9449|LMG9449_1776	K231|K231_0471	K337|K337_1552	KF24|KF24_1608	Li1|Li1_0590	N42|N42_1129	ML8|ML8_0029	UC317|UC317_2220	KF67|KF67_0492	LMG9446|LMG9446_0302	KF146|KF146_1410	KF134|KF134_0192	KF196|KF196_0576	DRA4|DRA4_2585	IL1403|IL1403_1186	CV56|CV56_1143	KLDS|KLDS_1155	LMG14418|LMG14418_1517	P7266|P7266_0264	44	1
OG_1185	Chloride channel protein	A76|A76_1207	UC509_9|UC5099_1153	FG2|FG2_0756	HP|HP_1537	LMG6897|LMG6897_1541	B40|B40_1365	SK11|SK11_1202	AM2|AM2_2015	SK110|SK110_0289	KW10|KW10_2144	KW2|KW2_1030	MG1363|MG1363_1526	NCDO763|NCDO763_0189	N41|N41_2520	V4|V4_1879	LMG8520|LMG8520_0198	IO_1|IO1_1044	LMG8526|LMG8526_1541	KF147|KF147_1167	KF282|KF282_2074	E34|E34_0045	KF201|KF201_1514	M20|M20_2502	ATCC19435|ATCC19435_2283	KF7|KF7_1604	LMG9449|LMG9449_1775	K231|K231_0470	K337|K337_1551	KF24|KF24_1609	Li1|Li1_0591	N42|N42_1130	ML8|ML8_0028	UC317|UC317_2219	KF67|KF67_0491	LMG9446|LMG9446_0303	KF146|KF146_1411	KF134|KF134_0191	KF196|KF196_0577	DRA4|DRA4_2586	IL1403|IL1403_1187	CV56|CV56_1144	KLDS|KLDS_1156	LMG14418|LMG14418_1518	P7266|P7266_0265	44	1
OG_1186	Nicotinate-nucleotide adenylyltransferase (EC2.7.7.18)	A76|A76_1208	UC509_9|UC5099_1154	FG2|FG2_0757	HP|HP_1538	LMG6897|LMG6897_1542	B40|B40_1366	SK11|SK11_1203	AM2|AM2_2014	SK110|SK110_0290	KW10|KW10_2145	KW2|KW2_1031	MG1363|MG1363_1525	NCDO763|NCDO763_0188	N41|N41_2521	V4|V4_1878	LMG8520|LMG8520_0199	IO_1|IO1_1045	LMG8526|LMG8526_1542	KF147|KF147_1168	KF282|KF282_2073	E34|E34_0046	KF201|KF201_1513	M20|M20_2503	ATCC19435|ATCC19435_2282	KF7|KF7_1605	LMG9449|LMG9449_1774	K231|K231_0469	K337|K337_1550	KF24|KF24_1610	Li1|Li1_0592	N42|N42_1131	ML8|ML8_0027	UC317|UC317_2218	KF67|KF67_0490	LMG9446|LMG9446_0304	KF146|KF146_1412	KF134|KF134_0190	KF196|KF196_0578	DRA4|DRA4_2587	IL1403|IL1403_1188	CV56|CV56_1145	KLDS|KLDS_1157	LMG14418|LMG14418_1519	P7266|P7266_0266	44	1
OG_1187	Nicotinate phosphoribosyltransferase (EC2.4.2.11)	A76|A76_1209	UC509_9|UC5099_1155	FG2|FG2_0758	HP|HP_1539	LMG6897|LMG6897_1543	B40|B40_1367	SK11|SK11_1204	AM2|AM2_2013	SK110|SK110_0291	KW10|KW10_2146	KW2|KW2_1032	MG1363|MG1363_1524	NCDO763|NCDO763_0187	N41|N41_2522	V4|V4_1877	LMG8520|LMG8520_0200	IO_1|IO1_1046	LMG8526|LMG8526_1543	KF147|KF147_1169	KF282|KF282_2072	E34|E34_0047	KF201|KF201_1512	M20|M20_2504	ATCC19435|ATCC19435_2281	KF7|KF7_1606	LMG9449|LMG9449_1773	K231|K231_0468	K337|K337_1549	KF24|KF24_1611	Li1|Li1_0593	N42|N42_1132	ML8|ML8_0026	UC317|UC317_2217	KF67|KF67_0489	LMG9446|LMG9446_0305	KF146|KF146_1413	KF134|KF134_0189	KF196|KF196_0579	DRA4|DRA4_2588	IL1403|IL1403_1189	CV56|CV56_1146	KLDS|KLDS_1158	LMG14418|LMG14418_1520	P7266|P7266_0267	44	1
OG_1188	NAD synthetase (EC 6.3.1.5)	A76|A76_1211	UC509_9|UC5099_1157	FG2|FG2_0760	HP|HP_1541	LMG6897|LMG6897_1545	B40|B40_1370	SK11|SK11_1206	AM2|AM2_2011	SK110|SK110_0293	KW10|KW10_2148	KW2|KW2_1034	MG1363|MG1363_1522	NCDO763|NCDO763_0185	N41|N41_2524	V4|V4_1875	LMG8520|LMG8520_0202	IO_1|IO1_1048	LMG8526|LMG8526_1545	KF147|KF147_1171	KF282|KF282_2070	E34|E34_0049	KF201|KF201_1510	M20|M20_2506	ATCC19435|ATCC19435_2279	KF7|KF7_1608	LMG9449|LMG9449_1771	K231|K231_0466	K337|K337_1547	KF24|KF24_1613	Li1|Li1_0595	N42|N42_1134	ML8|ML8_0024	UC317|UC317_2215	KF67|KF67_0487	LMG9446|LMG9446_0307	KF146|KF146_1415	KF134|KF134_0187	KF196|KF196_0581	DRA4|DRA4_2590	IL1403|IL1403_1191	CV56|CV56_1148	KLDS|KLDS_1160	LMG14418|LMG14418_1522	P7266|P7266_0269	44	1
OG_1189	ABC transporter ATP-binding protein YvcR	A76|A76_1212	UC509_9|UC5099_1158	FG2|FG2_0761	HP|HP_1542	LMG6897|LMG6897_1546	B40|B40_1371	SK11|SK11_1207	AM2|AM2_2010	SK110|SK110_0294	KW10|KW10_1335	KW2|KW2_1035	MG1363|MG1363_1521	NCDO763|NCDO763_0184	N41|N41_2525	V4|V4_1874	LMG8520|LMG8520_0203	IO_1|IO1_1049	LMG8526|LMG8526_1546	KF147|KF147_1172	KF282|KF282_2069	E34|E34_0050	KF201|KF201_1509	M20|M20_2507	ATCC19435|ATCC19435_2278	KF7|KF7_1609	LMG9449|LMG9449_1770	K231|K231_0465	K337|K337_1546	KF24|KF24_1614	Li1|Li1_0596	N42|N42_1135	ML8|ML8_0023	UC317|UC317_2214	KF67|KF67_0486	LMG9446|LMG9446_0308	KF146|KF146_1416	KF134|KF134_0186	KF196|KF196_0582	DRA4|DRA4_2591	IL1403|IL1403_1192	CV56|CV56_1149	KLDS|KLDS_1162	LMG14418|LMG14418_1523	P7266|P7266_0270	44	1
OG_119	IMP cyclohydrolase (EC 3.5.4.10) /Phosphoribosylaminoimidazolecarboxamide formyltransferase(EC 2.1.2.3)	A76|A76_1004	UC509_9|UC5099_1545	FG2|FG2_0725	HP|HP_1095	LMG6897|LMG6897_1626	B40|B40_0924	SK11|SK11_1629	AM2|AM2_2098	SK110|SK110_2447	KW10|KW10_2032	KW2|KW2_1463	MG1363|MG1363_1029	NCDO763|NCDO763_2302	N41|N41_0587	V4|V4_0329	LMG8520|LMG8520_2614	IO_1|IO1_1502	LMG8526|LMG8526_1249	KF147|KF147_1687 KF147|KF147_2324	KF282|KF282_1849	E34|E34_0503	KF201|KF201_1976	M20|M20_1682	ATCC19435|ATCC19435_1949	KF7|KF7_0565	LMG9449|LMG9449_1650 LMG9449|LMG9449_2280	K231|K231_1917	K337|K337_1951	KF24|KF24_1778	Li1|Li1_1706	N42|N42_0800	ML8|ML8_1480	UC317|UC317_1316	KF67|KF67_1010	LMG9446|LMG9446_1609	KF146|KF146_0770 KF146|KF146_2253	KF134|KF134_0028	KF196|KF196_1135	DRA4|DRA4_2411	IL1403|IL1403_1640	CV56|CV56_1513	KLDS|KLDS_1632	LMG14418|LMG14418_1338	P7266|P7266_1160	44	1
OG_1190	Translation elongation factor LepA	A76|A76_1217	UC509_9|UC5099_1163	FG2|FG2_0656	HP|HP_2236	LMG6897|LMG6897_0208	B40|B40_2257	SK11|SK11_1212	AM2|AM2_2004	SK110|SK110_0563	KW10|KW10_1309	KW2|KW2_1040	MG1363|MG1363_1516	NCDO763|NCDO763_0179	N41|N41_2530	V4|V4_1869	LMG8520|LMG8520_0209	IO_1|IO1_1054	LMG8526|LMG8526_1551	KF147|KF147_1177	KF282|KF282_2064	E34|E34_0055	KF201|KF201_1504	M20|M20_2512	ATCC19435|ATCC19435_2272	KF7|KF7_1614	LMG9449|LMG9449_1765	K231|K231_0460	K337|K337_1541	KF24|KF24_1619	Li1|Li1_0601	N42|N42_1140	ML8|ML8_0721	UC317|UC317_2209	KF67|KF67_0481	LMG9446|LMG9446_0313	KF146|KF146_1421	KF134|KF134_0181	KF196|KF196_0587	DRA4|DRA4_2596	IL1403|IL1403_1197	CV56|CV56_1154	KLDS|KLDS_1167	LMG14418|LMG14418_1528	P7266|P7266_0276	44	1
OG_1191	oxidoreductase ylbE	A76|A76_1218	UC509_9|UC5099_1164	FG2|FG2_0658	HP|HP_2238	LMG6897|LMG6897_0210	B40|B40_2258	SK11|SK11_1213	AM2|AM2_2003	SK110|SK110_0564	KW10|KW10_1308	KW2|KW2_1041	MG1363|MG1363_1506	NCDO763|NCDO763_0169	N41|N41_2540	V4|V4_1858	LMG8520|LMG8520_0210	IO_1|IO1_1055	LMG8526|LMG8526_1552	KF147|KF147_1178	KF282|KF282_2063	E34|E34_0056	KF201|KF201_1503	M20|M20_2513	ATCC19435|ATCC19435_2271	KF7|KF7_1615	LMG9449|LMG9449_1764	K231|K231_0459	K337|K337_1540	KF24|KF24_1620	Li1|Li1_0602	N42|N42_1141	ML8|ML8_0722	UC317|UC317_2208	KF67|KF67_0480	LMG9446|LMG9446_0314	KF146|KF146_1422	KF134|KF134_0180	KF196|KF196_0588	DRA4|DRA4_2597	IL1403|IL1403_1198	CV56|CV56_1155	KLDS|KLDS_1168	LMG14418|LMG14418_1529	P7266|P7266_0277	44	1
OG_1192	DNA gyrase subunit A (EC 5.99.1.3)	A76|A76_1223	UC509_9|UC5099_1170	FG2|FG2_2105	HP|HP_0905	LMG6897|LMG6897_0929	B40|B40_0997	SK11|SK11_1218	AM2|AM2_2001	SK110|SK110_0057	KW10|KW10_1306	KW2|KW2_1043	MG1363|MG1363_1504	NCDO763|NCDO763_0167	N41|N41_2542	V4|V4_1856	LMG8520|LMG8520_0213	IO_1|IO1_1057	LMG8526|LMG8526_1554	KF147|KF147_1180	KF282|KF282_2061	E34|E34_0058	KF201|KF201_1497	M20|M20_2515	ATCC19435|ATCC19435_2269	KF7|KF7_1617	LMG9449|LMG9449_1762	K231|K231_0457	K337|K337_1538	KF24|KF24_1622	Li1|Li1_0604	N42|N42_1143	ML8|ML8_0724	UC317|UC317_2206	KF67|KF67_0478	LMG9446|LMG9446_0316	KF146|KF146_1424	KF134|KF134_0178	KF196|KF196_0590	DRA4|DRA4_0046	IL1403|IL1403_1200	CV56|CV56_1157	KLDS|KLDS_1170	LMG14418|LMG14418_1531	P7266|P7266_1465	44	1
OG_1193	Sortase A, LPXTG specific	A76|A76_1225	UC509_9|UC5099_1172	FG2|FG2_2107	HP|HP_0903	LMG6897|LMG6897_0927	B40|B40_0999	SK11|SK11_1220	AM2|AM2_1999	SK110|SK110_0059	KW10|KW10_1304	KW2|KW2_1045	MG1363|MG1363_1502	NCDO763|NCDO763_0165	N41|N41_2544	V4|V4_1854	LMG8520|LMG8520_0215	IO_1|IO1_1059	LMG8526|LMG8526_1556	KF147|KF147_1182	KF282|KF282_2059	E34|E34_0060	KF201|KF201_1495	M20|M20_2517	ATCC19435|ATCC19435_2267	KF7|KF7_1619	LMG9449|LMG9449_1760	K231|K231_0455	K337|K337_1536	KF24|KF24_1624	Li1|Li1_0606	N42|N42_1145	ML8|ML8_0726	UC317|UC317_2204	KF67|KF67_0476	LMG9446|LMG9446_0318	KF146|KF146_1426	KF134|KF134_0176	KF196|KF196_0592	DRA4|DRA4_0048	IL1403|IL1403_1202	CV56|CV56_1159	KLDS|KLDS_1172	LMG14418|LMG14418_1533	P7266|P7266_1467	44	1
OG_1194	ATP-dependent DNA helicase UvrD/PcrA	A76|A76_1228	UC509_9|UC5099_1175	FG2|FG2_2111	HP|HP_0899	LMG6897|LMG6897_0923	B40|B40_1003	SK11|SK11_1223	AM2|AM2_1993	SK110|SK110_0062	KW10|KW10_1301	KW2|KW2_1048	MG1363|MG1363_1499	NCDO763|NCDO763_0162	N41|N41_1606	V4|V4_1851	LMG8520|LMG8520_0221	IO_1|IO1_1066	LMG8526|LMG8526_1561	KF147|KF147_1187	KF282|KF282_2055	E34|E34_0065	KF201|KF201_1491	M20|M20_2521	ATCC19435|ATCC19435_2261	KF7|KF7_1625	LMG9449|LMG9449_1755	K231|K231_0451	K337|K337_1530	KF24|KF24_1629	Li1|Li1_0610	N42|N42_1150	ML8|ML8_0731	UC317|UC317_2197	KF67|KF67_0472	LMG9446|LMG9446_0323	KF146|KF146_1430	KF134|KF134_0172	KF196|KF196_0596	DRA4|DRA4_0051	IL1403|IL1403_1208	CV56|CV56_1166	KLDS|KLDS_1179	LMG14418|LMG14418_1540	P7266|P7266_1468	44	1
OG_1195	tRNA pseudouridine synthase B (EC 4.2.1.70)	A76|A76_1246	UC509_9|UC5099_1193	FG2|FG2_2209	HP|HP_1408	LMG6897|LMG6897_1289	B40|B40_0453	SK11|SK11_1242	AM2|AM2_1987	SK110|SK110_1242	KW10|KW10_1291	KW2|KW2_1059	MG1363|MG1363_1484	NCDO763|NCDO763_2481	N41|N41_1594	V4|V4_1840	LMG8520|LMG8520_0228	IO_1|IO1_1073	LMG8526|LMG8526_1567	KF147|KF147_1193	KF282|KF282_2049	E34|E34_0071	KF201|KF201_1485	M20|M20_2527	ATCC19435|ATCC19435_2255	KF7|KF7_1631	LMG9449|LMG9449_1749	K231|K231_0445	K337|K337_1524	KF24|KF24_1635	Li1|Li1_0616	N42|N42_1156	ML8|ML8_0737	UC317|UC317_2191	KF67|KF67_0466	LMG9446|LMG9446_0329	KF146|KF146_1436	KF134|KF134_0166	KF196|KF196_0602	DRA4|DRA4_1783	IL1403|IL1403_1214	CV56|CV56_1172	KLDS|KLDS_1185	LMG14418|LMG14418_1546	P7266|P7266_1473	44	1
OG_1196	Riboflavin kinase (EC 2.7.1.26) / FMNadenylyltransferase (EC 2.7.7.2)	A76|A76_1247	UC509_9|UC5099_1194	FG2|FG2_2210	HP|HP_1409	LMG6897|LMG6897_1290	B40|B40_0452	SK11|SK11_1243	AM2|AM2_1986	SK110|SK110_1241	KW10|KW10_1290	KW2|KW2_1060	MG1363|MG1363_1483	NCDO763|NCDO763_2482	N41|N41_1593	V4|V4_1839	LMG8520|LMG8520_0229	IO_1|IO1_1074	LMG8526|LMG8526_1568	KF147|KF147_1194	KF282|KF282_2048	E34|E34_0072	KF201|KF201_1484	M20|M20_2528	ATCC19435|ATCC19435_2254	KF7|KF7_1632	LMG9449|LMG9449_1748	K231|K231_0444	K337|K337_1523	KF24|KF24_1636	Li1|Li1_0617	N42|N42_1157	ML8|ML8_0738	UC317|UC317_2190	KF67|KF67_0465	LMG9446|LMG9446_0330	KF146|KF146_1437	KF134|KF134_0165	KF196|KF196_0603	DRA4|DRA4_1784	IL1403|IL1403_1215	CV56|CV56_1173	KLDS|KLDS_1186	LMG14418|LMG14418_1547	P7266|P7266_1474	44	1
OG_1197	Outer surface protein of unknown function,cellobiose operon	A76|A76_1249	UC509_9|UC5099_1196	FG2|FG2_2212	HP|HP_1411	LMG6897|LMG6897_1292	B40|B40_0450	SK11|SK11_1245	AM2|AM2_1984	SK110|SK110_1239	KW10|KW10_1288	KW2|KW2_1062	MG1363|MG1363_1481	NCDO763|NCDO763_2484	N41|N41_1591	V4|V4_1837	LMG8520|LMG8520_0231	IO_1|IO1_1076	LMG8526|LMG8526_1570	KF147|KF147_1196	KF282|KF282_2046	E34|E34_0074	KF201|KF201_1482	M20|M20_2530	ATCC19435|ATCC19435_2252	KF7|KF7_1634	LMG9449|LMG9449_1746	K231|K231_0442	K337|K337_1521	KF24|KF24_1638	Li1|Li1_0619	N42|N42_1159	ML8|ML8_0740	UC317|UC317_2188	KF67|KF67_0463	LMG9446|LMG9446_0332	KF146|KF146_1439	KF134|KF134_0163	KF196|KF196_0605	DRA4|DRA4_1786	IL1403|IL1403_1217	CV56|CV56_1175	KLDS|KLDS_1188	LMG14418|LMG14418_2041	P7266|P7266_1477	44	1
OG_1198	N-acetylmuramic acid 6-phosphate etherase (EC4.2.-.-)	A76|A76_1250	UC509_9|UC5099_1197	FG2|FG2_2213	HP|HP_1412	LMG6897|LMG6897_1293	B40|B40_0448	SK11|SK11_1246	AM2|AM2_1982	SK110|SK110_1238	KW10|KW10_1287	KW2|KW2_1063	MG1363|MG1363_1480	NCDO763|NCDO763_2485	N41|N41_1590	V4|V4_1836	LMG8520|LMG8520_0232	IO_1|IO1_1077	LMG8526|LMG8526_1571	KF147|KF147_1197	KF282|KF282_2045	E34|E34_0075	KF201|KF201_1481	M20|M20_2531	ATCC19435|ATCC19435_2251	KF7|KF7_1635	LMG9449|LMG9449_1745	K231|K231_0441	K337|K337_1520	KF24|KF24_1639	Li1|Li1_0620	N42|N42_1160	ML8|ML8_0741	UC317|UC317_2187	KF67|KF67_0462	LMG9446|LMG9446_0333	KF146|KF146_1440	KF134|KF134_0162	KF196|KF196_0606	DRA4|DRA4_1787	IL1403|IL1403_1218	CV56|CV56_1176	KLDS|KLDS_1189	LMG14418|LMG14418_2042	P7266|P7266_1478	44	1
OG_1199	Sialic acid utilization regulator, RpiR family	A76|A76_1253	UC509_9|UC5099_1199	FG2|FG2_2215	HP|HP_1414	LMG6897|LMG6897_1295	B40|B40_0445	SK11|SK11_1248	AM2|AM2_1979	SK110|SK110_1236	KW10|KW10_1285	KW2|KW2_1065	MG1363|MG1363_1478	NCDO763|NCDO763_2487	N41|N41_1588	V4|V4_1834	LMG8520|LMG8520_0235	IO_1|IO1_1079	LMG8526|LMG8526_1573	KF147|KF147_1199	KF282|KF282_2043	E34|E34_0077	KF201|KF201_1479	M20|M20_2533	ATCC19435|ATCC19435_2249	KF7|KF7_1638	LMG9449|LMG9449_1742	K231|K231_0439	K337|K337_1518	KF24|KF24_1641	Li1|Li1_0622	N42|N42_1163	ML8|ML8_0744	UC317|UC317_2184	KF67|KF67_0460	LMG9446|LMG9446_0335	KF146|KF146_1443	KF134|KF134_0160	KF196|KF196_0608	DRA4|DRA4_1789	IL1403|IL1403_1221	CV56|CV56_1179	KLDS|KLDS_1191	LMG14418|LMG14418_2044	P7266|P7266_1480	44	1
OG_12	Acetate kinase (EC 2.7.2.1)	A76|A76_2325 A76|A76_2326	UC509_9|UC5099_2085 UC509_9|UC5099_2086	FG2|FG2_1241 FG2|FG2_1242	HP|HP_1176 HP|HP_1177	LMG6897|LMG6897_2503 LMG6897|LMG6897_2504	B40|B40_1924 B40|B40_1925	SK11|SK11_2316 SK11|SK11_2317	AM2|AM2_0180 AM2|AM2_0181	SK110|SK110_0141 SK110|SK110_0142	KW10|KW10_0422 KW10|KW10_0423	KW2|KW2_2054 KW2|KW2_2055	MG1363|MG1363_2365 MG1363|MG1363_2366	NCDO763|NCDO763_2216 NCDO763|NCDO763_2217	N41|N41_1393 N41|N41_1395	V4|V4_0971 V4|V4_0972	LMG8520|LMG8520_0091 LMG8520|LMG8520_0977	IO_1|IO1_2086 IO_1|IO1_2087	LMG8526|LMG8526_0273 LMG8526|LMG8526_0274	KF147|KF147_2260 KF147|KF147_2261	KF282|KF282_0252 KF282|KF282_0253	E34|E34_2054 E34|E34_2055	KF201|KF201_0981 KF201|KF201_0982	M20|M20_2282 M20|M20_2283	ATCC19435|ATCC19435_1863 ATCC19435|ATCC19435_1864	KF7|KF7_1317 KF7|KF7_1318	LMG9449|LMG9449_2654 LMG9449|LMG9449_2655	K231|K231_0300 K231|K231_0301	K337|K337_1273 K337|K337_1274	KF24|KF24_0249 KF24|KF24_0250	Li1|Li1_0270 Li1|Li1_0271	N42|N42_2356 N42|N42_2357	ML8|ML8_1352 ML8|ML8_1353	UC317|UC317_1518 UC317|UC317_1519	KF67|KF67_0025 KF67|KF67_0026	LMG9446|LMG9446_1355 LMG9446|LMG9446_1356	KF146|KF146_0860 KF146|KF146_0861	KF134|KF134_1977 KF134|KF134_1978	KF196|KF196_1320 KF196|KF196_1321	DRA4|DRA4_0206 DRA4|DRA4_0207	IL1403|IL1403_2186 IL1403|IL1403_2187	CV56|CV56_2112 CV56|CV56_2113	KLDS|KLDS_2303 KLDS|KLDS_2304	LMG14418|LMG14418_0396 LMG14418|LMG14418_0397	P7266|P7266_1624 P7266|P7266_1625	44	1
OG_120	Galactose-1-phosphate uridylyltransferase (EC2.7.7.10)	A76|A76_2270	UC509_9|UC5099_2048	FG2|FG2_0967	HP|HP_0079	LMG6897|LMG6897_0080	B40|B40_1266	SK11|SK11_2268	AM2|AM2_0215	SK110|SK110_0191	KW10|KW10_0390	KW2|KW2_2022	MG1363|MG1363_2310	NCDO763|NCDO763_1682	N41|N41_1428	V4|V4_0939	LMG8520|LMG8520_0057	IO_1|IO1_2055	LMG8526|LMG8526_0225	KF147|KF147_2227 KF147|KF147_2325	KF282|KF282_0219	E34|E34_2086	KF201|KF201_1015	M20|M20_2342	ATCC19435|ATCC19435_1652	KF7|KF7_1278	LMG9449|LMG9449_0069 LMG9449|LMG9449_1651	K231|K231_0241	K337|K337_1241	KF24|KF24_0192	Li1|Li1_0211	N42|N42_2323	ML8|ML8_0968	UC317|UC317_1486	KF67|KF67_1533	LMG9446|LMG9446_1321	KF146|KF146_1111 KF146|KF146_2254	KF134|KF134_1945	KF196|KF196_1256	DRA4|DRA4_0157	IL1403|IL1403_2152	CV56|CV56_2080	KLDS|KLDS_2250	LMG14418|LMG14418_1198	P7266|P7266_1594	44	1
OG_1200	Chromosomal replication initiator protein DnaA	A76|A76_0001	UC509_9|UC5099_0001	FG2|FG2_0127	HP|HP_1568	LMG6897|LMG6897_1886	B40|B40_0521	SK11|SK11_0001	AM2|AM2_0331	SK110|SK110_1321	KW10|KW10_1047	KW2|KW2_0001	MG1363|MG1363_0001	NCDO763|NCDO763_1133	N41|N41_1131	V4|V4_0821	LMG8520|LMG8520_1710	IO_1|IO1_0001	LMG8526|LMG8526_1509	KF147|KF147_0002	KF282|KF282_1267	E34|E34_0382	KF201|KF201_1261	M20|M20_2538	ATCC19435|ATCC19435_0525	KF7|KF7_2056	LMG9449|LMG9449_1845	K231|K231_0123	K337|K337_0948	KF24|KF24_2230	Li1|Li1_1770	N42|N42_0518	ML8|ML8_2077	UC317|UC317_1246	KF67|KF67_0751	LMG9446|LMG9446_1176	KF146|KF146_0001	KF134|KF134_2418	KF196|KF196_1947	DRA4|DRA4_1355	IL1403|IL1403_0002	CV56|CV56_0033	KLDS|KLDS_0001	LMG14418|LMG14418_1407	P7266|P7266_1865	44	1
OG_1201	DNA polymerase III beta subunit (EC 2.7.7.7)	A76|A76_0002	UC509_9|UC5099_0002	FG2|FG2_0128	HP|HP_1569	LMG6897|LMG6897_1887	B40|B40_0522	SK11|SK11_0002	AM2|AM2_0330	SK110|SK110_1322	KW10|KW10_1046	KW2|KW2_0002	MG1363|MG1363_0002	NCDO763|NCDO763_1132	N41|N41_1130	V4|V4_0820	LMG8520|LMG8520_1711	IO_1|IO1_0002	LMG8526|LMG8526_1508	KF147|KF147_0003	KF282|KF282_1266	E34|E34_0381	KF201|KF201_1262	M20|M20_2539	ATCC19435|ATCC19435_0526	KF7|KF7_2055	LMG9449|LMG9449_1846	K231|K231_0122	K337|K337_0947	KF24|KF24_2229	Li1|Li1_1771	N42|N42_0517	ML8|ML8_2078	UC317|UC317_1247	KF67|KF67_0752	LMG9446|LMG9446_1175	KF146|KF146_0002	KF134|KF134_2417	KF196|KF196_1946	DRA4|DRA4_1356	IL1403|IL1403_0003	CV56|CV56_0034	KLDS|KLDS_0002	LMG14418|LMG14418_1408	P7266|P7266_1864	44	1
OG_1202	ATP-dependent nuclease, subunit B	A76|A76_0003	UC509_9|UC5099_0003	FG2|FG2_0129	HP|HP_1570	LMG6897|LMG6897_1888	B40|B40_0523	SK11|SK11_0003	AM2|AM2_0329	SK110|SK110_1323	KW10|KW10_1045	KW2|KW2_0003	MG1363|MG1363_0003	NCDO763|NCDO763_1131	N41|N41_1129	V4|V4_0819	LMG8520|LMG8520_1712	IO_1|IO1_0003	LMG8526|LMG8526_1507	KF147|KF147_0004	KF282|KF282_1265	E34|E34_0380	KF201|KF201_1263	M20|M20_2540	ATCC19435|ATCC19435_0527	KF7|KF7_2054	LMG9449|LMG9449_1847	K231|K231_0121	K337|K337_0946	KF24|KF24_2228	Li1|Li1_1772	N42|N42_0516	ML8|ML8_2079	UC317|UC317_1248	KF67|KF67_0753	LMG9446|LMG9446_1174	KF146|KF146_0003	KF134|KF134_2416	KF196|KF196_1945	DRA4|DRA4_1357	IL1403|IL1403_0004	CV56|CV56_0035	KLDS|KLDS_0003	LMG14418|LMG14418_1409	P7266|P7266_1863	44	1
OG_1203	ATP-dependent nuclease, subunit A	A76|A76_0004	UC509_9|UC5099_0004	FG2|FG2_0130	HP|HP_1571	LMG6897|LMG6897_1889	B40|B40_0524	SK11|SK11_0004	AM2|AM2_0328	SK110|SK110_1324	KW10|KW10_1044	KW2|KW2_0004	MG1363|MG1363_0004	NCDO763|NCDO763_1130	N41|N41_1128	V4|V4_0818	LMG8520|LMG8520_1713	IO_1|IO1_0004	LMG8526|LMG8526_1506	KF147|KF147_0005	KF282|KF282_1264	E34|E34_0379	KF201|KF201_1264	M20|M20_2541	ATCC19435|ATCC19435_0528	KF7|KF7_2053	LMG9449|LMG9449_1848	K231|K231_0120	K337|K337_0945	KF24|KF24_2227	Li1|Li1_1773	N42|N42_0515	ML8|ML8_2080	UC317|UC317_1249	KF67|KF67_0754	LMG9446|LMG9446_1173	KF146|KF146_0004	KF134|KF134_2415	KF196|KF196_1944	DRA4|DRA4_1358	IL1403|IL1403_0005	CV56|CV56_0036	KLDS|KLDS_0004	LMG14418|LMG14418_1410	P7266|P7266_1862	44	1
OG_1204	R801 tRNA-Arg	A76|A76_0005	UC509_9|UC5099_0005	FG2|FG2_0131	HP|HP_1572	LMG6897|LMG6897_1890	B40|B40_0525	SK11|SK11_0005	AM2|AM2_0327	SK110|SK110_1325	KW10|KW10_1043	KW2|KW2_0005	MG1363|MG1363_0005	NCDO763|NCDO763_1129	N41|N41_1127	V4|V4_0817	LMG8520|LMG8520_1714	IO_1|IO1_0005	LMG8526|LMG8526_1505	KF147|KF147_0006	KF282|KF282_1263	E34|E34_0378	KF201|KF201_1265	M20|M20_2542	ATCC19435|ATCC19435_0529	KF7|KF7_2052	LMG9449|LMG9449_1849	K231|K231_0119	K337|K337_0944	KF24|KF24_2226	Li1|Li1_1774	N42|N42_0514	ML8|ML8_2081	UC317|UC317_1250	KF67|KF67_0755	LMG9446|LMG9446_1172	KF146|KF146_0005	KF134|KF134_2414	KF196|KF196_1943	DRA4|DRA4_1359	IL1403|IL1403_0006	CV56|CV56_0037	KLDS|KLDS_0005	LMG14418|LMG14418_1411	P7266|P7266_1861	44	1
OG_1205	Transcriptional regulator, XRE family	A76|A76_0006	UC509_9|UC5099_0006	FG2|FG2_0132	HP|HP_1573	LMG6897|LMG6897_1891	B40|B40_0526	SK11|SK11_0006	AM2|AM2_0326	SK110|SK110_1326	KW10|KW10_1042	KW2|KW2_0006	MG1363|MG1363_0006	NCDO763|NCDO763_1128	N41|N41_1126	V4|V4_0816	LMG8520|LMG8520_1715	IO_1|IO1_0006	LMG8526|LMG8526_1504	KF147|KF147_0007	KF282|KF282_1262	E34|E34_0377	KF201|KF201_1266	M20|M20_2543	ATCC19435|ATCC19435_0530	KF7|KF7_2051	LMG9449|LMG9449_1850	K231|K231_0118	K337|K337_0943	KF24|KF24_2225	Li1|Li1_1775	N42|N42_0513	ML8|ML8_2082	UC317|UC317_1251	KF67|KF67_0756	LMG9446|LMG9446_1171	KF146|KF146_0006	KF134|KF134_2413	KF196|KF196_1942	DRA4|DRA4_1360	IL1403|IL1403_0007	CV56|CV56_0038	KLDS|KLDS_0006	LMG14418|LMG14418_1412	P7266|P7266_1860	44	1
OG_1206	GTP-binding and nucleic acid-binding proteinYchF	A76|A76_0007	UC509_9|UC5099_0007	FG2|FG2_0133	HP|HP_1574	LMG6897|LMG6897_1892	B40|B40_0527	SK11|SK11_0007	AM2|AM2_0325	SK110|SK110_1327	KW10|KW10_1041	KW2|KW2_0007	MG1363|MG1363_0007	NCDO763|NCDO763_1127	N41|N41_1125	V4|V4_0815	LMG8520|LMG8520_1716	IO_1|IO1_0007	LMG8526|LMG8526_1503	KF147|KF147_0008	KF282|KF282_1261	E34|E34_0376	KF201|KF201_1267	M20|M20_2544	ATCC19435|ATCC19435_0531	KF7|KF7_2050	LMG9449|LMG9449_1851	K231|K231_0117	K337|K337_0942	KF24|KF24_2224	Li1|Li1_1776	N42|N42_0512	ML8|ML8_2083	UC317|UC317_1252	KF67|KF67_0757	LMG9446|LMG9446_1170	KF146|KF146_0007	KF134|KF134_2412	KF196|KF196_1941	DRA4|DRA4_1361	IL1403|IL1403_0008	CV56|CV56_0039	KLDS|KLDS_0007	LMG14418|LMG14418_1413	P7266|P7266_1859	44	1
OG_1207	Peptidyl-tRNA hydrolase (EC 3.1.1.29)	A76|A76_0010	UC509_9|UC5099_0010	FG2|FG2_0135	HP|HP_1576	LMG6897|LMG6897_1894	B40|B40_0530	SK11|SK11_0010	AM2|AM2_0317	SK110|SK110_1330	KW10|KW10_1035	KW2|KW2_0011	MG1363|MG1363_0011	NCDO763|NCDO763_1123	N41|N41_1121	V4|V4_0812	LMG8520|LMG8520_1483	IO_1|IO1_0012	LMG8526|LMG8526_1497	KF147|KF147_0015	KF282|KF282_1254	E34|E34_0369	KF201|KF201_1271	M20|M20_2549	ATCC19435|ATCC19435_0378	KF7|KF7_2044	LMG9449|LMG9449_1858	K231|K231_0109	K337|K337_0937	KF24|KF24_2218	Li1|Li1_1783	N42|N42_0505	ML8|ML8_2090	UC317|UC317_1259	KF67|KF67_0762	LMG9446|LMG9446_1165	KF146|KF146_0012	KF134|KF134_2407	KF196|KF196_1936	DRA4|DRA4_1364	IL1403|IL1403_0015	CV56|CV56_0045	KLDS|KLDS_0014	LMG14418|LMG14418_1420	P7266|P7266_1857	44	1
OG_1208	Transcription-repair coupling factor	A76|A76_0011	UC509_9|UC5099_0011	FG2|FG2_0136	HP|HP_1577	LMG6897|LMG6897_1895	B40|B40_0531	SK11|SK11_0011	AM2|AM2_0316	SK110|SK110_1331	KW10|KW10_1034	KW2|KW2_0012	MG1363|MG1363_0012	NCDO763|NCDO763_1122	N41|N41_1120	V4|V4_0811	LMG8520|LMG8520_1484	IO_1|IO1_0013	LMG8526|LMG8526_1496	KF147|KF147_0016	KF282|KF282_1253	E34|E34_0368	KF201|KF201_1272	M20|M20_2550	ATCC19435|ATCC19435_0379	KF7|KF7_2043	LMG9449|LMG9449_1859	K231|K231_0108	K337|K337_0936	KF24|KF24_2217	Li1|Li1_1784	N42|N42_0504	ML8|ML8_2091	UC317|UC317_1260	KF67|KF67_0763	LMG9446|LMG9446_1164	KF146|KF146_0013	KF134|KF134_2406	KF196|KF196_1935	DRA4|DRA4_1365	IL1403|IL1403_0016	CV56|CV56_0046	KLDS|KLDS_0015	LMG14418|LMG14418_1421	P7266|P7266_1856	44	1
OG_1209	Ribosome-associated heat shock proteinimplicated in the recycling of the 50S subunit (S4paralog)	A76|A76_0013	UC509_9|UC5099_0013	FG2|FG2_0138	HP|HP_1579	LMG6897|LMG6897_1897	B40|B40_0533	SK11|SK11_0013	AM2|AM2_0314	SK110|SK110_1333	KW10|KW10_1032	KW2|KW2_0014	MG1363|MG1363_0014	NCDO763|NCDO763_1120	N41|N41_1118	V4|V4_0809	LMG8520|LMG8520_1486	IO_1|IO1_0015	LMG8526|LMG8526_1494	KF147|KF147_0018	KF282|KF282_1251	E34|E34_0366	KF201|KF201_1274	M20|M20_2552	ATCC19435|ATCC19435_0381	KF7|KF7_2041	LMG9449|LMG9449_1861	K231|K231_0106	K337|K337_0934	KF24|KF24_2215	Li1|Li1_1786	N42|N42_0502	ML8|ML8_2094	UC317|UC317_1262	KF67|KF67_0765	LMG9446|LMG9446_1162	KF146|KF146_0015	KF134|KF134_2404	KF196|KF196_1933	DRA4|DRA4_1367	IL1403|IL1403_0018	CV56|CV56_0048	KLDS|KLDS_0017	LMG14418|LMG14418_0037	P7266|P7266_1855	44	1
OG_121	6-phospho-beta-glucosidase (EC 3.2.1.86)	A76|A76_1108	UC509_9|UC5099_1491				B40|B40_2451	SK11|SK11_1566	AM2|AM2_2157	SK110|SK110_2205	KW10|KW10_1968	KW2|KW2_1389	MG1363|MG1363_1088	NCDO763|NCDO763_1142	N41|N41_2123	V4|V4_0254	LMG8520|LMG8520_0535	IO_1|IO1_1435	LMG8526|LMG8526_1178 LMG8526|LMG8526_1987	KF147|KF147_1612 KF147|KF147_0699	KF282|KF282_1926	E34|E34_0441	KF201|KF201_2033	M20|M20_1243	ATCC19435|ATCC19435_1885	KF7|KF7_0505	LMG9449|LMG9449_2216	K231|K231_1980 K231|K231_1359	K337|K337_2014	KF24|KF24_2046 KF24|KF24_2474	Li1|Li1_1641 Li1|Li1_1474	N42|N42_0735	ML8|ML8_1534	UC317|UC317_1375	KF67|KF67_1067	LMG9446|LMG9446_1550	KF146|KF146_0827	KF134|KF134_0085	KF196|KF196_1192	DRA4|DRA4_2254	IL1403|IL1403_1580	CV56|CV56_1454	KLDS|KLDS_1566	LMG14418|LMG14418_0372	P7266|P7266_1213	41	FALSE
OG_1210	Cell division protein DivIC (FtsB), stabilizesFtsL against RasP cleavage	A76|A76_0014	UC509_9|UC5099_0014	FG2|FG2_0139	HP|HP_1580	LMG6897|LMG6897_1898	B40|B40_0534	SK11|SK11_0014	AM2|AM2_0313	SK110|SK110_1334	KW10|KW10_1031	KW2|KW2_0015	MG1363|MG1363_0015	NCDO763|NCDO763_1119	N41|N41_1117	V4|V4_0808	LMG8520|LMG8520_1487	IO_1|IO1_0016	LMG8526|LMG8526_1493	KF147|KF147_0019	KF282|KF282_1250	E34|E34_0365	KF201|KF201_1275	M20|M20_2553	ATCC19435|ATCC19435_0382	KF7|KF7_2040	LMG9449|LMG9449_1862	K231|K231_0105	K337|K337_0933	KF24|KF24_2214	Li1|Li1_1787	N42|N42_0501	ML8|ML8_2095	UC317|UC317_1263	KF67|KF67_0766	LMG9446|LMG9446_1161	KF146|KF146_0016	KF134|KF134_2403	KF196|KF196_1932	DRA4|DRA4_1368	IL1403|IL1403_0019	CV56|CV56_0049	KLDS|KLDS_0018	LMG14418|LMG14418_0038	P7266|P7266_1854	44	1
OG_1211	FIG00755635: hypothetical protein	A76|A76_0015	UC509_9|UC5099_0015	FG2|FG2_0140	HP|HP_1581	LMG6897|LMG6897_1899	B40|B40_0535	SK11|SK11_0015	AM2|AM2_0312	SK110|SK110_1335	KW10|KW10_1030	KW2|KW2_0016	MG1363|MG1363_0016	NCDO763|NCDO763_1118	N41|N41_1116	V4|V4_0807	LMG8520|LMG8520_1488	IO_1|IO1_0017	LMG8526|LMG8526_1492	KF147|KF147_0020	KF282|KF282_1249	E34|E34_0364	KF201|KF201_1276	M20|M20_2554	ATCC19435|ATCC19435_0383	KF7|KF7_2039	LMG9449|LMG9449_1863	K231|K231_0104	K337|K337_0932	KF24|KF24_2213	Li1|Li1_1788	N42|N42_0500	ML8|ML8_2096	UC317|UC317_1264	KF67|KF67_0767	LMG9446|LMG9446_1160	KF146|KF146_0017	KF134|KF134_2402	KF196|KF196_1931	DRA4|DRA4_1369	IL1403|IL1403_0020	CV56|CV56_0050	KLDS|KLDS_0019	LMG14418|LMG14418_0039	P7266|P7266_1853	44	1
OG_1212	FIG00755026: hypothetical protein	A76|A76_0016	UC509_9|UC5099_0016	FG2|FG2_0141	HP|HP_1582	LMG6897|LMG6897_1900	B40|B40_0536	SK11|SK11_0016	AM2|AM2_0311	SK110|SK110_1336	KW10|KW10_1029	KW2|KW2_0017	MG1363|MG1363_0017	NCDO763|NCDO763_1117	N41|N41_1115	V4|V4_0806	LMG8520|LMG8520_1489	IO_1|IO1_0018	LMG8526|LMG8526_1491	KF147|KF147_0021	KF282|KF282_1248	E34|E34_0363	KF201|KF201_1277	M20|M20_2555	ATCC19435|ATCC19435_0384	KF7|KF7_2038	LMG9449|LMG9449_1864	K231|K231_0103	K337|K337_0931	KF24|KF24_2212	Li1|Li1_1789	N42|N42_0499	ML8|ML8_2097	UC317|UC317_1265	KF67|KF67_0768	LMG9446|LMG9446_1159	KF146|KF146_0018	KF134|KF134_2401	KF196|KF196_1930	DRA4|DRA4_1370	IL1403|IL1403_0021	CV56|CV56_0051	KLDS|KLDS_0020	LMG14418|LMG14418_0040	P7266|P7266_1852	44	1
OG_1213	tRNA(Ile)-lysidine synthetase	A76|A76_0017	UC509_9|UC5099_0017	FG2|FG2_0142	HP|HP_1583	LMG6897|LMG6897_1901	B40|B40_0537	SK11|SK11_0017	AM2|AM2_0310	SK110|SK110_1337	KW10|KW10_1028	KW2|KW2_0018	MG1363|MG1363_0018	NCDO763|NCDO763_1116	N41|N41_1114	V4|V4_0805	LMG8520|LMG8520_1490	IO_1|IO1_0019	LMG8526|LMG8526_1490	KF147|KF147_0022	KF282|KF282_1247	E34|E34_0362	KF201|KF201_1278	M20|M20_2556	ATCC19435|ATCC19435_0385	KF7|KF7_2037	LMG9449|LMG9449_1865	K231|K231_0102	K337|K337_0930	KF24|KF24_2211	Li1|Li1_1790	N42|N42_0498	ML8|ML8_2098	UC317|UC317_1266	KF67|KF67_0769	LMG9446|LMG9446_1158	KF146|KF146_0019	KF134|KF134_2400	KF196|KF196_1929	DRA4|DRA4_1371	IL1403|IL1403_0022	CV56|CV56_0052	KLDS|KLDS_0021	LMG14418|LMG14418_0041	P7266|P7266_1851	44	1
OG_1214	Hypoxanthine-guanine phosphoribosyltransferase(EC 2.4.2.8)	A76|A76_0018	UC509_9|UC5099_0018	FG2|FG2_0143	HP|HP_1584	LMG6897|LMG6897_1902	B40|B40_0538	SK11|SK11_0018	AM2|AM2_0309	SK110|SK110_1338	KW10|KW10_1027	KW2|KW2_0019	MG1363|MG1363_0019	NCDO763|NCDO763_1115	N41|N41_1113	V4|V4_0804	LMG8520|LMG8520_1491	IO_1|IO1_0020	LMG8526|LMG8526_1489	KF147|KF147_0023	KF282|KF282_1246	E34|E34_0361	KF201|KF201_1279	M20|M20_2557	ATCC19435|ATCC19435_0386	KF7|KF7_2036	LMG9449|LMG9449_1866	K231|K231_0101	K337|K337_0929	KF24|KF24_2210	Li1|Li1_1791	N42|N42_0497	ML8|ML8_2099	UC317|UC317_1267	KF67|KF67_0770	LMG9446|LMG9446_1157	KF146|KF146_0020	KF134|KF134_2399	KF196|KF196_1928	DRA4|DRA4_1372	IL1403|IL1403_0023	CV56|CV56_0053	KLDS|KLDS_0022	LMG14418|LMG14418_0042	P7266|P7266_1850	44	1
OG_1215	PTS system, mannitol-specific IIA component (EC2.7.1.69)	A76|A76_0023	UC509_9|UC5099_0024	FG2|FG2_0473	HP|HP_1265	LMG6897|LMG6897_0053	B40|B40_0542	SK11|SK11_0022	AM2|AM2_0305	SK110|SK110_1342	KW10|KW10_1023	KW2|KW2_0023	MG1363|MG1363_0023	NCDO763|NCDO763_1111	N41|N41_1109	V4|V4_0800	LMG8520|LMG8520_1496	IO_1|IO1_0024	LMG8526|LMG8526_1485	KF147|KF147_0027	KF282|KF282_1242	E34|E34_0357	KF201|KF201_1283	M20|M20_2561	ATCC19435|ATCC19435_0391	KF7|KF7_2032	LMG9449|LMG9449_1870	K231|K231_0097	K337|K337_0925	KF24|KF24_2206	Li1|Li1_1795	N42|N42_0493	ML8|ML8_2103	UC317|UC317_1271	KF67|KF67_0774	LMG9446|LMG9446_1153	KF146|KF146_0024	KF134|KF134_1543	KF196|KF196_1924	DRA4|DRA4_1376	IL1403|IL1403_0028	CV56|CV56_0057	KLDS|KLDS_0026	LMG14418|LMG14418_2068	P7266|P7266_1845	44	1
OG_1216	Mannitol-1-phosphate 5-dehydrogenase (EC1.1.1.17)	A76|A76_0024	UC509_9|UC5099_0025	FG2|FG2_0472	HP|HP_1264	LMG6897|LMG6897_0054	B40|B40_0543	SK11|SK11_0023	AM2|AM2_0304	SK110|SK110_1343	KW10|KW10_1022	KW2|KW2_0024	MG1363|MG1363_0024	NCDO763|NCDO763_1110	N41|N41_1108	V4|V4_0799	LMG8520|LMG8520_1497	IO_1|IO1_0025	LMG8526|LMG8526_1484	KF147|KF147_0028	KF282|KF282_1241	E34|E34_0356	KF201|KF201_1284	M20|M20_2562	ATCC19435|ATCC19435_0392	KF7|KF7_2031	LMG9449|LMG9449_1871	K231|K231_0096	K337|K337_0924	KF24|KF24_2205	Li1|Li1_1796	N42|N42_0492	ML8|ML8_2104	UC317|UC317_1272	KF67|KF67_0775	LMG9446|LMG9446_1152	KF146|KF146_0025	KF134|KF134_1542	KF196|KF196_1923	DRA4|DRA4_1377	IL1403|IL1403_0029	CV56|CV56_0058	KLDS|KLDS_0027	LMG14418|LMG14418_2069	P7266|P7266_1844	44	1
OG_1217	Acetyltransferase (EC 2.3.1.-)	A76|A76_0033		FG2|FG2_2343	HP|HP_1703	LMG6897|LMG6897_0377	B40|B40_2337	SK11|SK11_0031	AM2|AM2_1228	SK110|SK110_0737	KW10|KW10_1019	KW2|KW2_0030	MG1363|MG1363_0059	NCDO763|NCDO763_0681	N41|N41_0355	V4|V4_0794	LMG8520|LMG8520_1498 LMG8520|LMG8520_1499	IO_1|IO1_0027 IO_1|IO1_0026	LMG8526|LMG8526_1483	KF147|KF147_0029	KF282|KF282_1214	E34|E34_0355	KF201|KF201_1285	M20|M20_2563	ATCC19435|ATCC19435_1279	KF7|KF7_2030	LMG9449|LMG9449_1872	K231|K231_0095	K337|K337_0923	KF24|KF24_2204	Li1|Li1_1797	N42|N42_2667	ML8|ML8_0841	UC317|UC317_1536	KF67|KF67_0776	LMG9446|LMG9446_1127 LMG9446|LMG9446_1128	KF146|KF146_0026	KF134|KF134_1541	KF196|KF196_1922	DRA4|DRA4_0765	IL1403|IL1403_0054	CV56|CV56_0084	KLDS|KLDS_0028	LMG14418|LMG14418_0221		42	FALSE
OG_1218	Aromatic amino acid aminotransferase gamma (EC2.6.1.57) @ N-acetyl-L,L-diaminopimelate aminotransferase(EC 2.6.1.-)	A76|A76_0037	UC509_9|UC5099_0030	FG2|FG2_2339	HP|HP_1707	LMG6897|LMG6897_0373	B40|B40_2333	SK11|SK11_0036	AM2|AM2_1232	SK110|SK110_0732	KW10|KW10_1015	KW2|KW2_0034	MG1363|MG1363_0064	NCDO763|NCDO763_1515	N41|N41_0359	V4|V4_0790	LMG8520|LMG8520_1856	IO_1|IO1_0031	LMG8526|LMG8526_1480	KF147|KF147_0033	KF282|KF282_1210	E34|E34_0351	KF201|KF201_1289	M20|M20_2567	ATCC19435|ATCC19435_1283	KF7|KF7_2026	LMG9449|LMG9449_1876	K231|K231_0091	K337|K337_0919	KF24|KF24_2200	Li1|Li1_1801	N42|N42_2663	ML8|ML8_0837	UC317|UC317_1540	KF67|KF67_0780	LMG9446|LMG9446_1123	KF146|KF146_0030	KF134|KF134_1537	KF196|KF196_1918	DRA4|DRA4_0770	IL1403|IL1403_0063	CV56|CV56_0088	KLDS|KLDS_0032	LMG14418|LMG14418_0217	P7266|P7266_1842	44	1
OG_1219	DNA recombination and repair protein RecO	A76|A76_0038	UC509_9|UC5099_0031	FG2|FG2_2338	HP|HP_1708	LMG6897|LMG6897_0372	B40|B40_2332	SK11|SK11_0037	AM2|AM2_1233	SK110|SK110_0731	KW10|KW10_1011	KW2|KW2_0035	MG1363|MG1363_0065	NCDO763|NCDO763_1516	N41|N41_0360	V4|V4_0789	LMG8520|LMG8520_1857	IO_1|IO1_0032	LMG8526|LMG8526_1476	KF147|KF147_0034	KF282|KF282_1209	E34|E34_0350	KF201|KF201_1290	M20|M20_2568	ATCC19435|ATCC19435_1284	KF7|KF7_2025	LMG9449|LMG9449_1877	K231|K231_0090	K337|K337_0918	KF24|KF24_2199	Li1|Li1_1802	N42|N42_2662	ML8|ML8_0836	UC317|UC317_1541	KF67|KF67_0781	LMG9446|LMG9446_1122	KF146|KF146_0031	KF134|KF134_1536	KF196|KF196_1917	DRA4|DRA4_0771	IL1403|IL1403_0064	CV56|CV56_0089	KLDS|KLDS_0033	LMG14418|LMG14418_0216	P7266|P7266_1841	44	1
OG_122	Cell wall surface anchor family protein	A76|A76_0913 A76|A76_0912		FG2|FG2_0173	HP|HP_1977	LMG6897|LMG6897_1994	B40|B40_1492 B40|B40_1491	SK11|SK11_1732	AM2|AM2_0948	SK110|SK110_0113		KW2|KW2_1549	MG1363|MG1363_0929	NCDO763|NCDO763_1739	N41|N41_2403	V4|V4_0634	LMG8520|LMG8520_0448	IO_1|IO1_1587			KF282|KF282_0921	E34|E34_0589	KF201|KF201_2168	M20|M20_0128	ATCC19435|ATCC19435_2009	KF7|KF7_0984	LMG9449|LMG9449_0608	K231|K231_1191	K337|K337_1075	KF24|KF24_0107	Li1|Li1_2440	N42|N42_0616	ML8|ML8_0514	UC317|UC317_0997	KF67|KF67_2450	LMG9446|LMG9446_2371	KF146|KF146_1512	KF134|KF134_1288	KF196|KF196_0661	DRA4|DRA4_0271	IL1403|IL1403_1731	CV56|CV56_1604	KLDS|KLDS_1723	LMG14418|LMG14418_1946	P7266|P7266_0233	40	FALSE
OG_1220	Dihydrolipoamide dehydrogenase of acetoindehydrogenase (EC 1.8.1.4)	A76|A76_0039	UC509_9|UC5099_0032	FG2|FG2_2337	HP|HP_1709	LMG6897|LMG6897_0371	B40|B40_2331	SK11|SK11_0038	AM2|AM2_1235	SK110|SK110_0730	KW10|KW10_1010	KW2|KW2_0038	MG1363|MG1363_0068	NCDO763|NCDO763_1519	N41|N41_0363	V4|V4_0786	LMG8520|LMG8520_1859	IO_1|IO1_0034	LMG8526|LMG8526_1472	KF147|KF147_0036	KF282|KF282_1205	E34|E34_0348	KF201|KF201_1292	M20|M20_2573	ATCC19435|ATCC19435_1286	KF7|KF7_2024	LMG9449|LMG9449_1879	K231|K231_0088	K337|K337_0914	KF24|KF24_2197	Li1|Li1_1804	N42|N42_2660	ML8|ML8_0832	UC317|UC317_1545	KF67|KF67_0783	LMG9446|LMG9446_1120	KF146|KF146_0033	KF134|KF134_1534	KF196|KF196_1915	DRA4|DRA4_0772	IL1403|IL1403_0066	CV56|CV56_0093	KLDS|KLDS_0035	LMG14418|LMG14418_0214	P7266|P7266_1840	44	1
OG_1221	Dihydrolipoamide acetyltransferase component(E2) of acetoin dehydrogenase complex (EC 2.3.1.-)	A76|A76_0040	UC509_9|UC5099_0033	FG2|FG2_2336	HP|HP_1710	LMG6897|LMG6897_0370	B40|B40_2330	SK11|SK11_0039	AM2|AM2_1236	SK110|SK110_0729	KW10|KW10_1009	KW2|KW2_0039	MG1363|MG1363_0069	NCDO763|NCDO763_1520	N41|N41_0364	V4|V4_0785	LMG8520|LMG8520_1860	IO_1|IO1_0035	LMG8526|LMG8526_1471	KF147|KF147_0037	KF282|KF282_1204	E34|E34_0347	KF201|KF201_1293	M20|M20_2574	ATCC19435|ATCC19435_1287	KF7|KF7_2023	LMG9449|LMG9449_1880	K231|K231_0087	K337|K337_0913	KF24|KF24_2196	Li1|Li1_1805	N42|N42_2659	ML8|ML8_0831	UC317|UC317_1546	KF67|KF67_0784	LMG9446|LMG9446_1119	KF146|KF146_0034	KF134|KF134_1533	KF196|KF196_1914	DRA4|DRA4_0773	IL1403|IL1403_0067	CV56|CV56_0094	KLDS|KLDS_0036	LMG14418|LMG14418_0213	P7266|P7266_1839	44	1
OG_1222	Acetoin dehydrogenase E1 component beta-subunit(EC 1.2.4.-)	A76|A76_0041	UC509_9|UC5099_0034	FG2|FG2_2335	HP|HP_1711	LMG6897|LMG6897_0369	B40|B40_2329	SK11|SK11_0040	AM2|AM2_1237	SK110|SK110_0728	KW10|KW10_1008	KW2|KW2_0040	MG1363|MG1363_0070	NCDO763|NCDO763_1521	N41|N41_0365	V4|V4_0784	LMG8520|LMG8520_1861	IO_1|IO1_0036	LMG8526|LMG8526_1470	KF147|KF147_0038	KF282|KF282_1203	E34|E34_0346	KF201|KF201_1294	M20|M20_2575	ATCC19435|ATCC19435_1288	KF7|KF7_2022	LMG9449|LMG9449_1881	K231|K231_0086	K337|K337_0912	KF24|KF24_2195	Li1|Li1_1806	N42|N42_2658	ML8|ML8_0830	UC317|UC317_1547	KF67|KF67_0785	LMG9446|LMG9446_1118	KF146|KF146_0035	KF134|KF134_1532	KF196|KF196_1913	DRA4|DRA4_0774	IL1403|IL1403_0068	CV56|CV56_0095	KLDS|KLDS_0037	LMG14418|LMG14418_0212	P7266|P7266_1838	44	1
OG_1223	Acetoin dehydrogenase E1 componentalpha-subunit (EC 1.2.4.-)	A76|A76_0042	UC509_9|UC5099_0035	FG2|FG2_2334	HP|HP_1712	LMG6897|LMG6897_0368	B40|B40_2328	SK11|SK11_0041	AM2|AM2_1238	SK110|SK110_0727	KW10|KW10_1007	KW2|KW2_0041	MG1363|MG1363_0071	NCDO763|NCDO763_1522	N41|N41_0366	V4|V4_0783	LMG8520|LMG8520_1862	IO_1|IO1_0037	LMG8526|LMG8526_1469	KF147|KF147_0039	KF282|KF282_1202	E34|E34_0345	KF201|KF201_1295	M20|M20_2576	ATCC19435|ATCC19435_1289	KF7|KF7_2021	LMG9449|LMG9449_1882	K231|K231_0085	K337|K337_0911	KF24|KF24_2194	Li1|Li1_1807	N42|N42_2657	ML8|ML8_0829	UC317|UC317_1548	KF67|KF67_0786	LMG9446|LMG9446_1117	KF146|KF146_0036	KF134|KF134_1531	KF196|KF196_1912	DRA4|DRA4_0775	IL1403|IL1403_0069	CV56|CV56_0096	KLDS|KLDS_0038	LMG14418|LMG14418_0211	P7266|P7266_1837	44	1
OG_1224	Lipoate-protein ligase A	A76|A76_0043	UC509_9|UC5099_0036	FG2|FG2_2333	HP|HP_1713	LMG6897|LMG6897_0367	B40|B40_2327	SK11|SK11_0042	AM2|AM2_1239	SK110|SK110_0726	KW10|KW10_1006	KW2|KW2_0042	MG1363|MG1363_0072	NCDO763|NCDO763_1523	N41|N41_0367	V4|V4_0782	LMG8520|LMG8520_1863	IO_1|IO1_0038	LMG8526|LMG8526_1468	KF147|KF147_0040	KF282|KF282_1201	E34|E34_0344	KF201|KF201_1296	M20|M20_2577	ATCC19435|ATCC19435_1290	KF7|KF7_2020	LMG9449|LMG9449_1883	K231|K231_0084	K337|K337_0910	KF24|KF24_2193	Li1|Li1_1808	N42|N42_2656	ML8|ML8_0828	UC317|UC317_1549	KF67|KF67_0787	LMG9446|LMG9446_1116	KF146|KF146_0037	KF134|KF134_1530	KF196|KF196_1911	DRA4|DRA4_0776	IL1403|IL1403_0070	CV56|CV56_0097	KLDS|KLDS_0039	LMG14418|LMG14418_0210	P7266|P7266_1836	44	1
OG_1225	Glycerophosphoryl diester phosphodiesterase (EC3.1.4.46)	A76|A76_0044	UC509_9|UC5099_0037	FG2|FG2_2332	HP|HP_1714	LMG6897|LMG6897_0366	B40|B40_2326	SK11|SK11_0043	AM2|AM2_1240	SK110|SK110_0725	KW10|KW10_1005	KW2|KW2_0043	MG1363|MG1363_0073	NCDO763|NCDO763_1524	N41|N41_0368	V4|V4_0781	LMG8520|LMG8520_1864	IO_1|IO1_0039	LMG8526|LMG8526_1467	KF147|KF147_0041	KF282|KF282_1200	E34|E34_0343	KF201|KF201_1297	M20|M20_2578	ATCC19435|ATCC19435_1291	KF7|KF7_2019	LMG9449|LMG9449_1884	K231|K231_0083	K337|K337_0909	KF24|KF24_2192	Li1|Li1_1809	N42|N42_2655	ML8|ML8_0827	UC317|UC317_1550	KF67|KF67_0788	LMG9446|LMG9446_1115	KF146|KF146_0038	KF134|KF134_1529	KF196|KF196_1910	DRA4|DRA4_0777	IL1403|IL1403_0071	CV56|CV56_0098	KLDS|KLDS_0040	LMG14418|LMG14418_0209	P7266|P7266_1835	44	1
OG_1226	Osmotically inducible protein C	A76|A76_0055	UC509_9|UC5099_0043	FG2|FG2_1189	HP|HP_0842	LMG6897|LMG6897_1012	B40|B40_2040	SK11|SK11_0051	AM2|AM2_1244	SK110|SK110_2024	KW10|KW10_1002	KW2|KW2_0048	MG1363|MG1363_0078	NCDO763|NCDO763_1529	N41|N41_0372	V4|V4_0775	LMG8520|LMG8520_1868	IO_1|IO1_0043	LMG8526|LMG8526_1463	KF147|KF147_0045	KF282|KF282_1196	E34|E34_0339	KF201|KF201_1301	M20|M20_2582	ATCC19435|ATCC19435_1295	KF7|KF7_2015	LMG9449|LMG9449_1888	K231|K231_0079	K337|K337_0905	KF24|KF24_2188	Li1|Li1_1812	N42|N42_2651	ML8|ML8_0823	UC317|UC317_1554	KF67|KF67_0792	LMG9446|LMG9446_1111	KF146|KF146_0042	KF134|KF134_1525	KF196|KF196_1906	DRA4|DRA4_1943	IL1403|IL1403_0075	CV56|CV56_0102	KLDS|KLDS_0044	LMG14418|LMG14418_0205	P7266|P7266_1831	44	1
OG_1227	Amino acid permease	A76|A76_0056	UC509_9|UC5099_0044	FG2|FG2_1188	HP|HP_0841	LMG6897|LMG6897_1011	B40|B40_2039	SK11|SK11_0052	AM2|AM2_1245	SK110|SK110_2023	KW10|KW10_1001	KW2|KW2_0049	MG1363|MG1363_0079	NCDO763|NCDO763_1530	N41|N41_0373	V4|V4_0774	LMG8520|LMG8520_1869	IO_1|IO1_0044	LMG8526|LMG8526_1462	KF147|KF147_0046	KF282|KF282_1195	E34|E34_0338	KF201|KF201_1302	M20|M20_2583	ATCC19435|ATCC19435_1296	KF7|KF7_2014	LMG9449|LMG9449_1889	K231|K231_0078	K337|K337_0904	KF24|KF24_2187	Li1|Li1_1813	N42|N42_2650	ML8|ML8_0822	UC317|UC317_1555	KF67|KF67_0793	LMG9446|LMG9446_1110	KF146|KF146_0043	KF134|KF134_1524	KF196|KF196_1905	DRA4|DRA4_1942	IL1403|IL1403_0076	CV56|CV56_0103	KLDS|KLDS_0045	LMG14418|LMG14418_0204	P7266|P7266_1829	44	1
OG_1228	Phosphate:acyl-ACP acyltransferase PlsX	A76|A76_0058	UC509_9|UC5099_0046	FG2|FG2_1187	HP|HP_0840	LMG6897|LMG6897_1009	B40|B40_2037	SK11|SK11_0053	AM2|AM2_1247	SK110|SK110_2021	KW10|KW10_0998	KW2|KW2_0050	MG1363|MG1363_0081	NCDO763|NCDO763_1532	N41|N41_0375	V4|V4_0772	LMG8520|LMG8520_1872	IO_1|IO1_0045	LMG8526|LMG8526_1461	KF147|KF147_0048	KF282|KF282_1194	E34|E34_0336	KF201|KF201_1304	M20|M20_2584	ATCC19435|ATCC19435_1298	KF7|KF7_2012	LMG9449|LMG9449_1891	K231|K231_0077	K337|K337_0903	KF24|KF24_2185	Li1|Li1_1814	N42|N42_2649	ML8|ML8_0821	UC317|UC317_1556	KF67|KF67_0795	LMG9446|LMG9446_1109	KF146|KF146_0044	KF134|KF134_1522	KF196|KF196_1904	DRA4|DRA4_1941	IL1403|IL1403_0078	CV56|CV56_0104	KLDS|KLDS_0047	LMG14418|LMG14418_0202	P7266|P7266_1827	44	1
OG_1229	Hydrolase (HAD superfamily)	A76|A76_0059	UC509_9|UC5099_0047	FG2|FG2_1186	HP|HP_0839	LMG6897|LMG6897_1008	B40|B40_2036	SK11|SK11_0054	AM2|AM2_1248	SK110|SK110_2020	KW10|KW10_0997	KW2|KW2_0051	MG1363|MG1363_0082	NCDO763|NCDO763_1533	N41|N41_0376	V4|V4_0771	LMG8520|LMG8520_1873	IO_1|IO1_0046	LMG8526|LMG8526_1460	KF147|KF147_0049	KF282|KF282_1193	E34|E34_0335	KF201|KF201_1305	M20|M20_2585	ATCC19435|ATCC19435_1299	KF7|KF7_2011	LMG9449|LMG9449_1892	K231|K231_0076	K337|K337_0902	KF24|KF24_2184	Li1|Li1_1815	N42|N42_2648	ML8|ML8_0820	UC317|UC317_1557	KF67|KF67_0796	LMG9446|LMG9446_1108	KF146|KF146_0045	KF134|KF134_1521	KF196|KF196_1903	DRA4|DRA4_1940	IL1403|IL1403_0079	CV56|CV56_0105	KLDS|KLDS_0048	LMG14418|LMG14418_0201	P7266|P7266_1826	44	1
OG_123	cation-transporting ATPase, E1-E2 family	A76|A76_1921	UC509_9|UC5099_0699 UC509_9|UC5099_0697				B40|B40_0520	SK11|SK11_0687 SK11|SK11_0688	AM2|AM2_2475	SK110|SK110_0719 SK110|SK110_0720	KW10|KW10_0763	KW2|KW2_0592	MG1363|MG1363_0665	NCDO763|NCDO763_0531	N41|N41_2042	V4|V4_0181	LMG8520|LMG8520_0165 LMG8520|LMG8520_0166	IO_1|IO1_0573	LMG8526|LMG8526_0754	KF147|KF147_0675	KF282|KF282_0148	E34|E34_0917	KF201|KF201_1802	M20|M20_0752	ATCC19435|ATCC19435_0700	KF7|KF7_1907	LMG9449|LMG9449_2444	K231|K231_1857	K337|K337_2374	KF24|KF24_1907	Li1|Li1_1430	N42|N42_1926	ML8|ML8_2332	UC317|UC317_2556	KF67|KF67_2360	LMG9446|LMG9446_1839	KF146|KF146_2377	KF134|KF134_2111	KF196|KF196_1955	DRA4|DRA4_1128 DRA4|DRA4_1129	IL1403|IL1403_0731	CV56|CV56_0627	KLDS|KLDS_0708	LMG14418|LMG14418_0768	P7266|P7266_0098	41	FALSE
OG_1230	ABC transporter ATP-binding protein uup	A76|A76_0060	UC509_9|UC5099_0048	FG2|FG2_1001	HP|HP_0919	LMG6897|LMG6897_1142	B40|B40_2035	SK11|SK11_0055	AM2|AM2_1249	SK110|SK110_1922	KW10|KW10_0996	KW2|KW2_0052	MG1363|MG1363_0083	NCDO763|NCDO763_1903	N41|N41_0377	V4|V4_0770	LMG8520|LMG8520_1874	IO_1|IO1_0047	LMG8526|LMG8526_1458	KF147|KF147_0050	KF282|KF282_1192	E34|E34_0334	KF201|KF201_1306	M20|M20_2586	ATCC19435|ATCC19435_1300	KF7|KF7_2010	LMG9449|LMG9449_1893	K231|K231_0075	K337|K337_0901	KF24|KF24_2183	Li1|Li1_1816	N42|N42_2647	ML8|ML8_0819	UC317|UC317_1558	KF67|KF67_0797	LMG9446|LMG9446_1107	KF146|KF146_0046	KF134|KF134_1520	KF196|KF196_1902	DRA4|DRA4_1541	IL1403|IL1403_0080	CV56|CV56_0106	KLDS|KLDS_0049	LMG14418|LMG14418_0200	P7266|P7266_1825	44	1
OG_1231	Bacterial cell division membrane protein	A76|A76_1663	UC509_9|UC5099_0958	FG2|FG2_0396	HP|HP_1159	LMG6897|LMG6897_1606	B40|B40_1510	SK11|SK11_0941	AM2|AM2_1468	SK110|SK110_0381	KW10|KW10_0678	KW2|KW2_0831	MG1363|MG1363_1728	NCDO763|NCDO763_1485 NCDO763|NCDO763_1484	N41|N41_1820 N41|N41_1819	V4|V4_1008	LMG8520|LMG8520_1698	IO_1|IO1_0847	LMG8526|LMG8526_1030	KF147|KF147_0925	KF282|KF282_2260	E34|E34_1794	KF201|KF201_1687	M20|M20_2610	ATCC19435|ATCC19435_1338	KF7|KF7_1435	LMG9449|LMG9449_2488		K337|K337_1729	KF24|KF24_0672	Li1|Li1_0424	N42|N42_0957	ML8|ML8_2489	UC317|UC317_1156	KF67|KF67_0893	LMG9446|LMG9446_0142	KF146|KF146_1245	KF134|KF134_0352	KF196|KF196_0416	DRA4|DRA4_0378	IL1403|IL1403_0943	CV56|CV56_0898	KLDS|KLDS_0911	LMG14418|LMG14418_2262	P7266|P7266_1337	43	FALSE
OG_1232	FIG00755982: hypothetical protein	A76|A76_1661	UC509_9|UC5099_0960	FG2|FG2_1939	HP|HP_1150	LMG6897|LMG6897_0659	B40|B40_1300	SK11|SK11_0943	AM2|AM2_1466	SK110|SK110_0379	KW10|KW10_0676	KW2|KW2_0833	MG1363|MG1363_1726	NCDO763|NCDO763_1482	N41|N41_1817	V4|V4_1011	LMG8520|LMG8520_1694	IO_1|IO1_0849	LMG8526|LMG8526_1028	KF147|KF147_0927	KF282|KF282_2258	E34|E34_1796	KF201|KF201_1685	M20|M20_2612	ATCC19435|ATCC19435_1341	KF7|KF7_1437	LMG9449|LMG9449_2490	K231|K231_0643	K337|K337_1726	KF24|KF24_0675	Li1|Li1_0426	N42|N42_0960	ML8|ML8_2491	UC317|UC317_1158	KF67|KF67_0895	LMG9446|LMG9446_0144	KF146|KF146_1247	KF134|KF134_0350	KF196|KF196_0418	DRA4|DRA4_0376	IL1403|IL1403_0945	CV56|CV56_0900	KLDS|KLDS_0913	LMG14418|LMG14418_2264	P7266|P7266_0156	44	1
OG_1233	Ribosyl nicotinamide transporter, PnuC-like	A76|A76_1659	UC509_9|UC5099_0962	FG2|FG2_1937	HP|HP_1152	LMG6897|LMG6897_0661	B40|B40_1298	SK11|SK11_0945	AM2|AM2_1465	SK110|SK110_0377	KW10|KW10_0674	KW2|KW2_0836	MG1363|MG1363_1724	NCDO763|NCDO763_1480	N41|N41_1815	V4|V4_1013	LMG8520|LMG8520_1693	IO_1|IO1_0850	LMG8526|LMG8526_1027	KF147|KF147_0928	KF282|KF282_2257	E34|E34_1797	KF201|KF201_1684	M20|M20_2613	ATCC19435|ATCC19435_1342	KF7|KF7_1438	LMG9449|LMG9449_2491	K231|K231_0642	K337|K337_1725	KF24|KF24_0676	Li1|Li1_0427	N42|N42_0961	ML8|ML8_2492	UC317|UC317_1159	KF67|KF67_0896	LMG9446|LMG9446_0145	KF146|KF146_1248	KF134|KF134_0349	KF196|KF196_0419	DRA4|DRA4_0374	IL1403|IL1403_0946	CV56|CV56_0901	KLDS|KLDS_0914	LMG14418|LMG14418_2265	P7266|P7266_0119	44	1
OG_1234	FIG00755131: hypothetical protein	A76|A76_1658	UC509_9|UC5099_0963	FG2|FG2_1936	HP|HP_1153	LMG6897|LMG6897_0662	B40|B40_1297	SK11|SK11_0946	AM2|AM2_1464	SK110|SK110_0376	KW10|KW10_0673	KW2|KW2_0837	MG1363|MG1363_1723	NCDO763|NCDO763_1479	N41|N41_1814	V4|V4_1014	LMG8520|LMG8520_1692	IO_1|IO1_0851	LMG8526|LMG8526_1026	KF147|KF147_0929	KF282|KF282_2256	E34|E34_1798	KF201|KF201_1683	M20|M20_2614	ATCC19435|ATCC19435_1343	KF7|KF7_1439	LMG9449|LMG9449_2492	K231|K231_0641	K337|K337_1724	KF24|KF24_0677	Li1|Li1_0428	N42|N42_0962	ML8|ML8_2493	UC317|UC317_1160	KF67|KF67_0897	LMG9446|LMG9446_0146	KF146|KF146_1249	KF134|KF134_0348	KF196|KF196_0420	DRA4|DRA4_0373	IL1403|IL1403_0947	CV56|CV56_0902	KLDS|KLDS_0915	LMG14418|LMG14418_2266	P7266|P7266_1458	44	1
OG_1235	Universal stress protein family	A76|A76_1657	UC509_9|UC5099_0964	FG2|FG2_1935	HP|HP_1154	LMG6897|LMG6897_0663	B40|B40_1296	SK11|SK11_0947	AM2|AM2_1463	SK110|SK110_0375	KW10|KW10_0672	KW2|KW2_0838	MG1363|MG1363_1722	NCDO763|NCDO763_1478	N41|N41_1813	V4|V4_1015	LMG8520|LMG8520_1691	IO_1|IO1_0852	LMG8526|LMG8526_1025	KF147|KF147_0930	KF282|KF282_2255	E34|E34_1799	KF201|KF201_1682	M20|M20_2615	ATCC19435|ATCC19435_1344	KF7|KF7_1440	LMG9449|LMG9449_2493	K231|K231_0640	K337|K337_1723	KF24|KF24_0678	Li1|Li1_0429	N42|N42_0963	ML8|ML8_2494	UC317|UC317_1161	KF67|KF67_0898	LMG9446|LMG9446_0147	KF146|KF146_1250	KF134|KF134_0347	KF196|KF196_0421	DRA4|DRA4_0372	IL1403|IL1403_0948	CV56|CV56_0903	KLDS|KLDS_0916	LMG14418|LMG14418_2267	P7266|P7266_0121	44	1
OG_1236	Transcriptional regulator, TetR family	A76|A76_1655	UC509_9|UC5099_0966	FG2|FG2_1933	HP|HP_1156	LMG6897|LMG6897_0665	B40|B40_1294	SK11|SK11_0949	AM2|AM2_1461	SK110|SK110_0373	KW10|KW10_0670	KW2|KW2_0840	MG1363|MG1363_1720	NCDO763|NCDO763_1476	N41|N41_1811	V4|V4_1017	LMG8520|LMG8520_1689	IO_1|IO1_0854	LMG8526|LMG8526_1023	KF147|KF147_0932	KF282|KF282_2253	E34|E34_1801	KF201|KF201_1680	M20|M20_2617	ATCC19435|ATCC19435_1346	KF7|KF7_1442	LMG9449|LMG9449_2127	K231|K231_0638	K337|K337_1721	KF24|KF24_0516	Li1|Li1_0431	N42|N42_0965	ML8|ML8_2496	UC317|UC317_1163	KF67|KF67_0900	LMG9446|LMG9446_0149	KF146|KF146_1252	KF134|KF134_0345	KF196|KF196_0423	DRA4|DRA4_0370	IL1403|IL1403_0950	CV56|CV56_0905	KLDS|KLDS_0918	LMG14418|LMG14418_2269	P7266|P7266_0123	44	1
OG_1237	Phage infection protein	A76|A76_1652	UC509_9|UC5099_0969	FG2|FG2_1381	HP|HP_1692	LMG6897|LMG6897_1143	B40|B40_0872	SK11|SK11_0952	AM2|AM2_1460	SK110|SK110_2349	KW10|KW10_0669	KW2|KW2_0841	MG1363|MG1363_1719	NCDO763|NCDO763_1475	N41|N41_1810	V4|V4_1018	LMG8520|LMG8520_1688	IO_1|IO1_0855	LMG8526|LMG8526_1022	KF147|KF147_0933	KF282|KF282_2252	E34|E34_1802	KF201|KF201_1679	M20|M20_2618	ATCC19435|ATCC19435_1347	KF7|KF7_1443	LMG9449|LMG9449_2126	K231|K231_0637	K337|K337_1720	KF24|KF24_0515	Li1|Li1_0432	N42|N42_0966	ML8|ML8_2498	UC317|UC317_1164	KF67|KF67_0902	LMG9446|LMG9446_0150	KF146|KF146_1253	KF134|KF134_0344	KF196|KF196_0424	DRA4|DRA4_0128	IL1403|IL1403_0951	CV56|CV56_0906	KLDS|KLDS_0919	LMG14418|LMG14418_2270	P7266|P7266_0124	44	1
OG_1238	Probable aromatic ring hydroxylating enzyme,evidenced by COGnitor; PaaD-like protein (DUF59) involvedin Fe-S cluster assembly	A76|A76_1651	UC509_9|UC5099_0970	FG2|FG2_1382	HP|HP_1691	LMG6897|LMG6897_1144	B40|B40_0871	SK11|SK11_0953	AM2|AM2_1458	SK110|SK110_2348	KW10|KW10_0668	KW2|KW2_0842	MG1363|MG1363_1718	NCDO763|NCDO763_1474	N41|N41_1809	V4|V4_1019	LMG8520|LMG8520_1687	IO_1|IO1_0857	LMG8526|LMG8526_1020	KF147|KF147_0935	KF282|KF282_2250	E34|E34_1804	KF201|KF201_1677	M20|M20_2620	ATCC19435|ATCC19435_1349	KF7|KF7_1445	LMG9449|LMG9449_2124	K231|K231_0635	K337|K337_1718	KF24|KF24_0513	Li1|Li1_0434	N42|N42_0968	ML8|ML8_2500	UC317|UC317_1166	KF67|KF67_0904	LMG9446|LMG9446_0152	KF146|KF146_1255	KF134|KF134_0342	KF196|KF196_0426	DRA4|DRA4_0127	IL1403|IL1403_0953	CV56|CV56_0908	KLDS|KLDS_0921	LMG14418|LMG14418_2272	P7266|P7266_0125	44	1
OG_1239	Tyrosine recombinase XerC	A76|A76_1314	UC509_9|UC5099_1315	FG2|FG2_0692	HP|HP_0146	LMG6897|LMG6897_1138	B40|B40_2415	SK11|SK11_1310	AM2|AM2_1800	SK110|SK110_1472	KW10|KW10_1178	KW2|KW2_1183	MG1363|MG1363_1323	NCDO763|NCDO763_0877	N41|N41_1163	V4|V4_1542	LMG8520|LMG8520_1198	IO_1|IO1_1173	LMG8526|LMG8526_1657	KF147|KF147_1321	KF282|KF282_1947	E34|E34_2166	KF201|KF201_1159	M20|M20_2625	ATCC19435|ATCC19435_0138	KF7|KF7_1732	LMG9449|LMG9449_1387	K231|K231_2102	K337|K337_1422	KF24|KF24_0897	Li1|Li1_0742	N42|N42_0574	ML8|ML8_0698	UC317|UC317_1909	KF67|KF67_1862	LMG9446|LMG9446_0431	KF146|KF146_0624	KF134|KF134_1731	KF196|KF196_0765	DRA4|DRA4_2542	IL1403|IL1403_1345	CV56|CV56_1280	KLDS|KLDS_1364	LMG14418|LMG14418_1799	P7266|P7266_1537	44	1
OG_124	Quinone oxidoreductase (EC 1.6.5.5)	A76|A76_0283	UC509_9|UC5099_0240 UC509_9|UC5099_0239	FG2|FG2_1457	HP|HP_0026	LMG6897|LMG6897_0528	B40|B40_2223	SK11|SK11_0233	AM2|AM2_2392	SK110|SK110_1045	KW10|KW10_1635	KW2|KW2_0218	MG1363|MG1363_0250	NCDO763|NCDO763_0337	N41|N41_0299	V4|V4_2243 V4|V4_2242	LMG8520|LMG8520_1850	IO_1|IO1_0210	LMG8526|LMG8526_1280	KF147|KF147_0235	KF282|KF282_0454	E34|E34_0170	KF201|KF201_0165	M20|M20_1386	ATCC19435|ATCC19435_0949	KF7|KF7_0700	LMG9449|LMG9449_1177	K231|K231_1621	K337|K337_0374	KF24|KF24_1104	Li1|Li1_1969	N42|N42_0168	ML8|ML8_0430	UC317|UC317_0005	KF67|KF67_0316	LMG9446|LMG9446_0947	KF146|KF146_0290	KF134|KF134_1341	KF196|KF196_2323	DRA4|DRA4_1000	IL1403|IL1403_0263 IL1403|IL1403_0265	CV56|CV56_0259	KLDS|KLDS_0287	LMG14418|LMG14418_2117		43	FALSE
OG_1240	tRNA:m(5)U-54 MTase gid	A76|A76_1315	UC509_9|UC5099_1314	FG2|FG2_0691	HP|HP_0145	LMG6897|LMG6897_1137	B40|B40_2414	SK11|SK11_1311	AM2|AM2_1801	SK110|SK110_1471	KW10|KW10_1177	KW2|KW2_1182	MG1363|MG1363_1324	NCDO763|NCDO763_0876	N41|N41_1164	V4|V4_1541	LMG8520|LMG8520_1197	IO_1|IO1_1172	LMG8526|LMG8526_1656	KF147|KF147_1320	KF282|KF282_1948	E34|E34_2167	KF201|KF201_1158	M20|M20_2626	ATCC19435|ATCC19435_0137	KF7|KF7_1731	LMG9449|LMG9449_1388	K231|K231_2103	K337|K337_1423	KF24|KF24_0898	Li1|Li1_0741	N42|N42_0575	ML8|ML8_0697	UC317|UC317_1908	KF67|KF67_1861	LMG9446|LMG9446_0430	KF146|KF146_0625	KF134|KF134_1732	KF196|KF196_0764	DRA4|DRA4_2541	IL1403|IL1403_1344	CV56|CV56_1279	KLDS|KLDS_1363	LMG14418|LMG14418_1800	P7266|P7266_1536	44	1
OG_1241	DNA topoisomerase I (EC 5.99.1.2)	A76|A76_1316	UC509_9|UC5099_1313	FG2|FG2_0690	HP|HP_0144	LMG6897|LMG6897_1136	B40|B40_2413	SK11|SK11_1312	AM2|AM2_1802	SK110|SK110_1470	KW10|KW10_1176	KW2|KW2_1181	MG1363|MG1363_1325	NCDO763|NCDO763_0875	N41|N41_1165	V4|V4_1540	LMG8520|LMG8520_1196	IO_1|IO1_1171	LMG8526|LMG8526_1655	KF147|KF147_1319	KF282|KF282_1949	E34|E34_2168	KF201|KF201_1157	M20|M20_2627	ATCC19435|ATCC19435_0136	KF7|KF7_1730	LMG9449|LMG9449_1389	K231|K231_2104	K337|K337_1424	KF24|KF24_0899	Li1|Li1_0740	N42|N42_0576	ML8|ML8_0696	UC317|UC317_1907	KF67|KF67_1860	LMG9446|LMG9446_0429	KF146|KF146_0626	KF134|KF134_1733	KF196|KF196_0763	DRA4|DRA4_2540	IL1403|IL1403_1343	CV56|CV56_1278	KLDS|KLDS_1362	LMG14418|LMG14418_1801	P7266|P7266_1535	44	1
OG_1242	Alpha-acetolactate decarboxylase (EC 4.1.1.5)	A76|A76_1319	UC509_9|UC5099_1310	FG2|FG2_0687	HP|HP_0141	LMG6897|LMG6897_1133	B40|B40_2410	SK11|SK11_1315	AM2|AM2_1805	SK110|SK110_1467	KW10|KW10_1173	KW2|KW2_1178	MG1363|MG1363_1328	NCDO763|NCDO763_0872	N41|N41_1168	V4|V4_1536	LMG8520|LMG8520_0639	IO_1|IO1_1168	LMG8526|LMG8526_1652	KF147|KF147_1316	KF282|KF282_1952	E34|E34_2171	KF201|KF201_1154	M20|M20_2630	ATCC19435|ATCC19435_0132	KF7|KF7_1727	LMG9449|LMG9449_1392	K231|K231_2107	K337|K337_1427	KF24|KF24_0902	Li1|Li1_0737	N42|N42_0579	ML8|ML8_0692	UC317|UC317_1903	KF67|KF67_1856	LMG9446|LMG9446_0426	KF146|KF146_0629	KF134|KF134_1736	KF196|KF196_0760	DRA4|DRA4_2537	IL1403|IL1403_1339	CV56|CV56_1274	KLDS|KLDS_1359	LMG14418|LMG14418_1804	P7266|P7266_1533	44	1
OG_1243	Ketol-acid reductoisomerase (EC 1.1.1.86)	A76|A76_1322 A76|A76_1323	UC509_9|UC5099_1308	FG2|FG2_0685	HP|HP_0139	LMG6897|LMG6897_1131	B40|B40_2408	SK11|SK11_1318	AM2|AM2_1810 AM2|AM2_1809	SK110|SK110_1464	KW10|KW10_1170	KW2|KW2_1176	MG1363|MG1363_1330	NCDO763|NCDO763_0870		V4|V4_1534	LMG8520|LMG8520_0636 LMG8520|LMG8520_0637	IO_1|IO1_1165	LMG8526|LMG8526_1649	KF147|KF147_1313	KF282|KF282_1954	E34|E34_2174	KF201|KF201_1151	M20|M20_2633	ATCC19435|ATCC19435_0129	KF7|KF7_1724	LMG9449|LMG9449_1395	K231|K231_2110	K337|K337_1430	KF24|KF24_0905	Li1|Li1_0734	N42|N42_0582		UC317|UC317_1900	KF67|KF67_1853	LMG9446|LMG9446_0423	KF146|KF146_0632	KF134|KF134_1739	KF196|KF196_0757	DRA4|DRA4_2534	IL1403|IL1403_1336	CV56|CV56_1271	KLDS|KLDS_1356	LMG14418|LMG14418_0352		41	FALSE
OG_1244	3-isopropylmalate dehydratase small subunit (EC4.2.1.33)	A76|A76_1329	UC509_9|UC5099_1301	FG2|FG2_0680	HP|HP_0134	LMG6897|LMG6897_1126	B40|B40_2403	SK11|SK11_1323 SK11|SK11_1326	AM2|AM2_1815	SK110|SK110_1459 SK110|SK110_0337	KW10|KW10_1165	KW2|KW2_1171	MG1363|MG1363_1335	NCDO763|NCDO763_0865		V4|V4_1529		IO_1|IO1_1160	LMG8526|LMG8526_1644	KF147|KF147_1308	KF282|KF282_1959	E34|E34_2179	KF201|KF201_1146		ATCC19435|ATCC19435_0124	KF7|KF7_1719	LMG9449|LMG9449_1400	K231|K231_2115	K337|K337_1435	KF24|KF24_0910	Li1|Li1_0729	N42|N42_0587		UC317|UC317_1895 UC317|UC317_1894	KF67|KF67_1848	LMG9446|LMG9446_0418	KF146|KF146_0637	KF134|KF134_1744	KF196|KF196_0752	DRA4|DRA4_2529 DRA4|DRA4_0347	IL1403|IL1403_1331	CV56|CV56_1266	KLDS|KLDS_1351	LMG14418|LMG14418_0347		39	FALSE
OG_1245	hypothetical protein	A76|A76_2733	UC509_9|UC5099_2396 UC509_9|UC5099_2466 UC509_9|UC5099_2561	FG2|FG2_0861	HP|HP_0172 HP|HP_0050	LMG6897|LMG6897_1169	B40|B40_0060 B40|B40_2432 B40|B40_2053	SK11|SK11_2707	AM2|AM2_1426	SK110|SK110_1277			MG1363|MG1363_0715	NCDO763|NCDO763_1999	N41|N41_0458	V4|V4_1383 V4|V4_2529		IO_1|IO1_2259		KF147|KF147_2628	KF282|KF282_0940				ATCC19435|ATCC19435_2051	KF7|KF7_1788	LMG9449|LMG9449_2209	K231|K231_2097		KF24|KF24_1807 KF24|KF24_2041		N42|N42_1606 N42|N42_0538	ML8|ML8_2461 ML8|ML8_1446			LMG9446|LMG9446_0578	KF146|KF146_2207			DRA4|DRA4_0616	IL1403|IL1403_0095					27	FALSE
OG_1246	Glycerol kinase (EC 2.7.1.30)	A76|A76_1500	UC509_9|UC5099_1448	FG2|FG2_2664	HP|HP_2042	LMG6897|LMG6897_0344	B40|B40_2282	SK11|SK11_1506	AM2|AM2_1786	SK110|SK110_0760	KW10|KW10_2205	KW2|KW2_1339	MG1363|MG1363_1142	NCDO763|NCDO763_2419	N41|N41_0492	V4|V4_0861		IO_1|IO1_1238	LMG8526|LMG8526_1671	KF147|KF147_1357	KF282|KF282_0760 KF282|KF282_2593	E34|E34_0648	KF201|KF201_0842	M20|M20_1556	ATCC19435|ATCC19435_0168	KF7|KF7_0338	LMG9449|LMG9449_2051	K231|K231_0813	K337|K337_1905	KF24|KF24_1454	Li1|Li1_1073	N42|N42_1414	ML8|ML8_1383		KF67|KF67_1888	LMG9446|LMG9446_0813	KF146|KF146_0597	KF134|KF134_1711	KF196|KF196_0792	DRA4|DRA4_0805	IL1403|IL1403_1358	CV56|CV56_1293	KLDS|KLDS_1380	LMG14418|LMG14418_1786	P7266|P7266_0876	42	FALSE
OG_1247	putative esterase	A76|A76_2377	UC509_9|UC5099_2123	FG2|FG2_0424		LMG6897|LMG6897_1275	B40|B40_1548	SK11|SK11_2357	AM2|AM2_1421	SK110|SK110_0584	KW10|KW10_0455	KW2|KW2_2088	MG1363|MG1363_2399	NCDO763|NCDO763_2184	N41|N41_1360	V4|V4_1004	LMG8520|LMG8520_1020	IO_1|IO1_2120	LMG8526|LMG8526_0304	KF147|KF147_2352	KF282|KF282_0286	E34|E34_2024	KF201|KF201_0947	M20|M20_0002	ATCC19435|ATCC19435_1829	KF7|KF7_1348	LMG9449|LMG9449_2781	K231|K231_0334	K337|K337_1306	KF24|KF24_0283	Li1|Li1_0303	N42|N42_2389	ML8|ML8_1319	UC317|UC317_0608	KF67|KF67_2648	LMG9446|LMG9446_1386	KF146|KF146_0892	KF134|KF134_2009	KF196|KF196_1352	DRA4|DRA4_2079	IL1403|IL1403_2221	CV56|CV56_2147	KLDS|KLDS_2339	LMG14418|LMG14418_1704	P7266|P7266_1334	43	FALSE
OG_1248	C3-degrading proteinase	A76|A76_2378	UC509_9|UC5099_2124	FG2|FG2_0423		LMG6897|LMG6897_1274	B40|B40_1547	SK11|SK11_2358	AM2|AM2_1420	SK110|SK110_0583	KW10|KW10_0456	KW2|KW2_2089	MG1363|MG1363_2400	NCDO763|NCDO763_2183	N41|N41_1359	V4|V4_1005	LMG8520|LMG8520_1021	IO_1|IO1_2121	LMG8526|LMG8526_0305	KF147|KF147_2353	KF282|KF282_0287	E34|E34_2023	KF201|KF201_0946	M20|M20_0003	ATCC19435|ATCC19435_1828	KF7|KF7_1349	LMG9449|LMG9449_2780	K231|K231_0335	K337|K337_1307	KF24|KF24_0284	Li1|Li1_0304	N42|N42_2390	ML8|ML8_1318	UC317|UC317_0607	KF67|KF67_2647	LMG9446|LMG9446_1387	KF146|KF146_0893	KF134|KF134_2010	KF196|KF196_1353	DRA4|DRA4_2078	IL1403|IL1403_2222	CV56|CV56_2148	KLDS|KLDS_2340	LMG14418|LMG14418_1703	P7266|P7266_1333	43	FALSE
OG_1249	Glycerol uptake facilitator protein	A76|A76_2384	UC509_9|UC5099_2129	FG2|FG2_0479	HP|HP_1304	LMG6897|LMG6897_1915	B40|B40_2359	SK11|SK11_2364	AM2|AM2_1418	SK110|SK110_1284	KW10|KW10_0460	KW2|KW2_2095	MG1363|MG1363_2405	NCDO763|NCDO763_2178	N41|N41_1896	V4|V4_2404	LMG8520|LMG8520_1023	IO_1|IO1_2124	LMG8526|LMG8526_0307	KF147|KF147_2355	KF282|KF282_0289	E34|E34_2021	KF201|KF201_0944	M20|M20_0005	ATCC19435|ATCC19435_1826	KF7|KF7_1351	LMG9449|LMG9449_2778	K231|K231_0337	K337|K337_1309	KF24|KF24_0286	Li1|Li1_0306	N42|N42_2392	ML8|ML8_1316	UC317|UC317_0605	KF67|KF67_2645	LMG9446|LMG9446_1389	KF146|KF146_0895	KF134|KF134_2012	KF196|KF196_1355	DRA4|DRA4_2186	IL1403|IL1403_2224	CV56|CV56_2150	KLDS|KLDS_2342	LMG14418|LMG14418_1701	P7266|P7266_1331	44	1
OG_125	aerobic energy metabolism	A76|A76_2277	UC509_9|UC5099_2056 UC509_9|UC5099_2055	FG2|FG2_0973	HP|HP_0085	LMG6897|LMG6897_0086	B40|B40_1271	SK11|SK11_2273	AM2|AM2_0209	SK110|SK110_0186	KW10|KW10_0395	KW2|KW2_2027	MG1363|MG1363_2315 MG1363|MG1363_2316	NCDO763|NCDO763_1677 NCDO763|NCDO763_1676	N41|N41_1423 N41|N41_1422	V4|V4_0944	LMG8520|LMG8520_0063 LMG8520|LMG8520_0062	IO_1|IO1_2060	LMG8526|LMG8526_0230	KF147|KF147_2232	KF282|KF282_0224	E34|E34_2081	KF201|KF201_1010	M20|M20_2337	ATCC19435|ATCC19435_1657	KF7|KF7_1283	LMG9449|LMG9449_0074	K231|K231_0246	K337|K337_1246	KF24|KF24_0197	Li1|Li1_0216	N42|N42_2328	ML8|ML8_0973	UC317|UC317_1491	KF67|KF67_1538	LMG9446|LMG9446_1326	KF146|KF146_1116	KF134|KF134_1950	KF196|KF196_1261	DRA4|DRA4_0162	IL1403|IL1403_2158	CV56|CV56_2085	KLDS|KLDS_2255	LMG14418|LMG14418_1912	P7266|P7266_1599	44	1
OG_1250	Xaa-Pro dipeptidyl-peptidase (EC 3.4.14.11)	A76|A76_2385	UC509_9|UC5099_2130	FG2|FG2_0480	HP|HP_1305	LMG6897|LMG6897_1916	B40|B40_2360	SK11|SK11_2365	AM2|AM2_1417	SK110|SK110_1285	KW10|KW10_0461	KW2|KW2_2096	MG1363|MG1363_2406	NCDO763|NCDO763_2177	N41|N41_1895	V4|V4_2403	LMG8520|LMG8520_1024	IO_1|IO1_2125	LMG8526|LMG8526_0308	KF147|KF147_2356	KF282|KF282_0290	E34|E34_2020	KF201|KF201_0943	M20|M20_0006	ATCC19435|ATCC19435_1825	KF7|KF7_1352	LMG9449|LMG9449_2777	K231|K231_0338	K337|K337_1310	KF24|KF24_0287	Li1|Li1_0307	N42|N42_2393	ML8|ML8_1315	UC317|UC317_0604	KF67|KF67_2644	LMG9446|LMG9446_1390	KF146|KF146_0896	KF134|KF134_2013	KF196|KF196_1356	DRA4|DRA4_2187	IL1403|IL1403_2225	CV56|CV56_2151	KLDS|KLDS_2343	LMG14418|LMG14418_1700	P7266|P7266_1330	44	1
OG_1251	Glutamine amidotransferase, class I	A76|A76_2386	UC509_9|UC5099_2131	FG2|FG2_0482	HP|HP_1307	LMG6897|LMG6897_1918	B40|B40_2362	SK11|SK11_2367	AM2|AM2_1416	SK110|SK110_1287	KW10|KW10_0462	KW2|KW2_2097	MG1363|MG1363_2407	NCDO763|NCDO763_2176	N41|N41_1894	V4|V4_2402	LMG8520|LMG8520_1025	IO_1|IO1_2126	LMG8526|LMG8526_0309	KF147|KF147_2357	KF282|KF282_0291	E34|E34_2019	KF201|KF201_0942	M20|M20_0007	ATCC19435|ATCC19435_1824	KF7|KF7_1353	LMG9449|LMG9449_2776	K231|K231_0339	K337|K337_1311	KF24|KF24_0288	Li1|Li1_0308	N42|N42_2394	ML8|ML8_1314	UC317|UC317_0602	KF67|KF67_2643	LMG9446|LMG9446_1391	KF146|KF146_0897	KF134|KF134_2014	KF196|KF196_1357	DRA4|DRA4_2189	IL1403|IL1403_2226	CV56|CV56_2152	KLDS|KLDS_2344	LMG14418|LMG14418_1699	P7266|P7266_1329	44	1
OG_1252	Cysteine ABC transporter, substrate-bindingprotein	A76|A76_2387	UC509_9|UC5099_2132	FG2|FG2_0483	HP|HP_1308	LMG6897|LMG6897_1919	B40|B40_2363	SK11|SK11_2368	AM2|AM2_1415	SK110|SK110_1288	KW10|KW10_0463	KW2|KW2_2098	MG1363|MG1363_2408	NCDO763|NCDO763_2175	N41|N41_1893	V4|V4_2401	LMG8520|LMG8520_1026	IO_1|IO1_2127	LMG8526|LMG8526_0310	KF147|KF147_2358	KF282|KF282_0292	E34|E34_2018	KF201|KF201_0941	M20|M20_0008	ATCC19435|ATCC19435_1823	KF7|KF7_1354	LMG9449|LMG9449_2775	K231|K231_0340	K337|K337_1312	KF24|KF24_0289	Li1|Li1_0309	N42|N42_2395	ML8|ML8_1313	UC317|UC317_0601	KF67|KF67_2642	LMG9446|LMG9446_1392	KF146|KF146_0898	KF134|KF134_2015	KF196|KF196_1358	DRA4|DRA4_2190	IL1403|IL1403_2227	CV56|CV56_2153	KLDS|KLDS_2345	LMG14418|LMG14418_1698	P7266|P7266_1328	44	1
OG_1253	Glutamyl-tRNA synthetase (EC 6.1.1.17) @Glutamyl-tRNA(Gln) synthetase (EC 6.1.1.24)	A76|A76_2389	UC509_9|UC5099_2134	FG2|FG2_0485	HP|HP_1310	LMG6897|LMG6897_1921	B40|B40_2365	SK11|SK11_2371	AM2|AM2_1413	SK110|SK110_1291	KW10|KW10_0464	KW2|KW2_2100	MG1363|MG1363_2410	NCDO763|NCDO763_2173	N41|N41_1891	V4|V4_2399	LMG8520|LMG8520_1027	IO_1|IO1_2128	LMG8526|LMG8526_0311	KF147|KF147_2360	KF282|KF282_0293	E34|E34_2016	KF201|KF201_0939	M20|M20_0010	ATCC19435|ATCC19435_1821	KF7|KF7_1356	LMG9449|LMG9449_2773	K231|K231_0342	K337|K337_1314	KF24|KF24_0291	Li1|Li1_0311	N42|N42_2397	ML8|ML8_1311	UC317|UC317_0599	KF67|KF67_2640	LMG9446|LMG9446_1394	KF146|KF146_0900	KF134|KF134_2017	KF196|KF196_1360	DRA4|DRA4_2193	IL1403|IL1403_2230	CV56|CV56_2155	KLDS|KLDS_2347	LMG14418|LMG14418_1696	P7266|P7266_1325	44	1
OG_1254	FIG00755285: hypothetical protein	A76|A76_2393	UC509_9|UC5099_2138	FG2|FG2_0489	HP|HP_1314	LMG6897|LMG6897_1925	B40|B40_2369	SK11|SK11_2377	AM2|AM2_1411	SK110|SK110_0354	KW10|KW10_0468	KW2|KW2_2104	MG1363|MG1363_2414	NCDO763|NCDO763_2169	N41|N41_1886	V4|V4_2395	LMG8520|LMG8520_1030	IO_1|IO1_2130	LMG8526|LMG8526_0313	KF147|KF147_2362	KF282|KF282_0295	E34|E34_2014	KF201|KF201_0937	M20|M20_0012	ATCC19435|ATCC19435_1819	KF7|KF7_1358	LMG9449|LMG9449_2771	K231|K231_0344	K337|K337_1316	KF24|KF24_0293	Li1|Li1_0313	N42|N42_2399	ML8|ML8_1309	UC317|UC317_0597	KF67|KF67_2638	LMG9446|LMG9446_1396	KF146|KF146_0902	KF134|KF134_2019	KF196|KF196_1362	DRA4|DRA4_1119	IL1403|IL1403_2232	CV56|CV56_2157	KLDS|KLDS_2349	LMG14418|LMG14418_1694		43	FALSE
OG_1255	Membrane protein, putative	A76|A76_2401	UC509_9|UC5099_2146	FG2|FG2_1625	HP|HP_2060	LMG6897|LMG6897_2334	B40|B40_2377	SK11|SK11_2385	AM2|AM2_2261	SK110|SK110_0346	KW10|KW10_0475	KW2|KW2_2111	MG1363|MG1363_2421	NCDO763|NCDO763_2162	N41|N41_1879	V4|V4_2388	LMG8520|LMG8520_1037	IO_1|IO1_2137	LMG8526|LMG8526_0321	KF147|KF147_2369	KF282|KF282_0303	E34|E34_2007	KF201|KF201_0929	M20|M20_0020	ATCC19435|ATCC19435_1812	KF7|KF7_1367	LMG9449|LMG9449_2764	K231|K231_0351	K337|K337_1324	KF24|KF24_0301	Li1|Li1_0321	N42|N42_2407	ML8|ML8_1131	UC317|UC317_2136	KF67|KF67_2630	LMG9446|LMG9446_1404	KF146|KF146_0910	KF134|KF134_2027	KF196|KF196_1370	DRA4|DRA4_1127	IL1403|IL1403_2241	CV56|CV56_2166	KLDS|KLDS_2357	LMG14418|LMG14418_1686		43	FALSE
OG_1256	DNA repair protein RadA	A76|A76_2403	UC509_9|UC5099_2148	FG2|FG2_0066	HP|HP_2189	LMG6897|LMG6897_1394	B40|B40_2321	SK11|SK11_2387	AM2|AM2_2260	SK110|SK110_1577	KW10|KW10_0476	KW2|KW2_2112	MG1363|MG1363_2422	NCDO763|NCDO763_2161	N41|N41_1878	V4|V4_2387	LMG8520|LMG8520_1038	IO_1|IO1_2138	LMG8526|LMG8526_0322	KF147|KF147_2370	KF282|KF282_0304	E34|E34_2006	KF201|KF201_0928	M20|M20_0021	ATCC19435|ATCC19435_1811	KF7|KF7_1368	LMG9449|LMG9449_2763	K231|K231_0352	K337|K337_1325	KF24|KF24_0302	Li1|Li1_0322	N42|N42_2408	ML8|ML8_1132	UC317|UC317_2137	KF67|KF67_2629	LMG9446|LMG9446_1405	KF146|KF146_0911	KF134|KF134_2028	KF196|KF196_1371	DRA4|DRA4_1558	IL1403|IL1403_2242	CV56|CV56_2167	KLDS|KLDS_2358	LMG14418|LMG14418_1685	P7266|P7266_1317	44	1
OG_1257	Adenylate kinase (EC 2.7.4.3)	A76|A76_2419	UC509_9|UC5099_2164	FG2|FG2_0048	HP|HP_0863	LMG6897|LMG6897_0888	B40|B40_1688	SK11|SK11_2403	AM2|AM2_2251	SK110|SK110_1594	KW10|KW10_0482	KW2|KW2_2127	MG1363|MG1363_2438	NCDO763|NCDO763_2145	N41|N41_1862	V4|V4_2371	LMG8520|LMG8520_1047	IO_1|IO1_2147	LMG8526|LMG8526_0390	KF147|KF147_2387	KF282|KF282_0313	E34|E34_1996	KF201|KF201_0918	M20|M20_0031	ATCC19435|ATCC19435_1801	KF7|KF7_1377	LMG9449|LMG9449_2752	K231|K231_0362	K337|K337_1334	KF24|KF24_0313	Li1|Li1_0332	N42|N42_2417	ML8|ML8_1141	UC317|UC317_1061	KF67|KF67_2620	LMG9446|LMG9446_1414	KF146|KF146_0920	KF134|KF134_2037	KF196|KF196_1380	DRA4|DRA4_1575	IL1403|IL1403_2254	CV56|CV56_2176	KLDS|KLDS_2367	LMG14418|LMG14418_1676	P7266|P7266_1307	44	1
OG_1258	Preprotein translocase secY subunit (TC3.A.5.1.1)	A76|A76_2420	UC509_9|UC5099_2165	FG2|FG2_0047	HP|HP_0864	LMG6897|LMG6897_0889	B40|B40_1687	SK11|SK11_2404	AM2|AM2_2250	SK110|SK110_1595	KW10|KW10_0483	KW2|KW2_2128	MG1363|MG1363_2439	NCDO763|NCDO763_2144	N41|N41_1861	V4|V4_2370	LMG8520|LMG8520_1048	IO_1|IO1_2148	LMG8526|LMG8526_0391	KF147|KF147_2388	KF282|KF282_0314	E34|E34_1995	KF201|KF201_0917	M20|M20_0032	ATCC19435|ATCC19435_1800	KF7|KF7_1378	LMG9449|LMG9449_2751	K231|K231_0363	K337|K337_1335	KF24|KF24_0314	Li1|Li1_0333	N42|N42_2418	ML8|ML8_1142	UC317|UC317_1062	KF67|KF67_2619	LMG9446|LMG9446_1415	KF146|KF146_0921	KF134|KF134_2038	KF196|KF196_1381	DRA4|DRA4_1576	IL1403|IL1403_2255	CV56|CV56_2177	KLDS|KLDS_2368	LMG14418|LMG14418_1675	P7266|P7266_1306	44	1
OG_1259	LSU ribosomal protein L15p (L27Ae)	A76|A76_2421	UC509_9|UC5099_2166	FG2|FG2_0046	HP|HP_0865	LMG6897|LMG6897_0890	B40|B40_1686	SK11|SK11_2405	AM2|AM2_2249	SK110|SK110_1596	KW10|KW10_0484	KW2|KW2_2129	MG1363|MG1363_2440	NCDO763|NCDO763_2143	N41|N41_1860	V4|V4_2369	LMG8520|LMG8520_1049	IO_1|IO1_2149	LMG8526|LMG8526_0392	KF147|KF147_2389	KF282|KF282_0315	E34|E34_1994	KF201|KF201_0916	M20|M20_0033	ATCC19435|ATCC19435_1799	KF7|KF7_1379	LMG9449|LMG9449_2750	K231|K231_0364	K337|K337_1336	KF24|KF24_0315	Li1|Li1_0334	N42|N42_2419	ML8|ML8_1143	UC317|UC317_1063	KF67|KF67_2618	LMG9446|LMG9446_1416	KF146|KF146_0922	KF134|KF134_2039	KF196|KF196_1382	DRA4|DRA4_1577	IL1403|IL1403_2256	CV56|CV56_2178	KLDS|KLDS_2369	LMG14418|LMG14418_1674	P7266|P7266_1305	44	1
OG_126	Transcriptional regulator	A76|A76_2258	UC509_9|UC5099_2036 UC509_9|UC5099_2035	FG2|FG2_0954	HP|HP_0066	LMG6897|LMG6897_0067	B40|B40_1253	SK11|SK11_2255	AM2|AM2_0231	SK110|SK110_0203		KW2|KW2_2007	MG1363|MG1363_2297	NCDO763|NCDO763_0592 NCDO763|NCDO763_0591	N41|N41_1442 N41|N41_1441	V4|V4_0925 V4|V4_0926	LMG8520|LMG8520_0038	IO_1|IO1_2042	LMG8526|LMG8526_0210	KF147|KF147_2211 KF147|KF147_2210	KF282|KF282_0204	E34|E34_2101	KF201|KF201_1029	M20|M20_2357	ATCC19435|ATCC19435_1629	KF7|KF7_1264	LMG9449|LMG9449_0051	K231|K231_0225	K337|K337_1227	KF24|KF24_0177	Li1|Li1_0196	N42|N42_2308	ML8|ML8_0952	UC317|UC317_2387	KF67|KF67_1510	LMG9446|LMG9446_1305	KF146|KF146_1096	KF134|KF134_1930	KF196|KF196_1241	DRA4|DRA4_0145	IL1403|IL1403_2136	CV56|CV56_2064	KLDS|KLDS_2234	LMG14418|LMG14418_1184		42	FALSE
OG_1260	LSU ribosomal protein L30p (L7e)	A76|A76_2422	UC509_9|UC5099_2167	FG2|FG2_0045	HP|HP_0866	LMG6897|LMG6897_0891	B40|B40_1685	SK11|SK11_2406	AM2|AM2_2248	SK110|SK110_1597	KW10|KW10_0485	KW2|KW2_2130	MG1363|MG1363_2441	NCDO763|NCDO763_2142	N41|N41_1859	V4|V4_2368	LMG8520|LMG8520_1050	IO_1|IO1_2150	LMG8526|LMG8526_0393	KF147|KF147_2390	KF282|KF282_0316	E34|E34_1993	KF201|KF201_0915	M20|M20_0034	ATCC19435|ATCC19435_1798	KF7|KF7_1380	LMG9449|LMG9449_2749	K231|K231_0365	K337|K337_1337	KF24|KF24_0316	Li1|Li1_0335	N42|N42_2420	ML8|ML8_1144	UC317|UC317_1064	KF67|KF67_2617	LMG9446|LMG9446_1417	KF146|KF146_0923	KF134|KF134_2040	KF196|KF196_1383	DRA4|DRA4_1578	IL1403|IL1403_2257	CV56|CV56_2179	KLDS|KLDS_2370	LMG14418|LMG14418_1673	P7266|P7266_1304	44	1
OG_1261	SSU ribosomal protein S5p (S2e)	A76|A76_2423	UC509_9|UC5099_2168	FG2|FG2_0044	HP|HP_0867	LMG6897|LMG6897_0892	B40|B40_1684	SK11|SK11_2407	AM2|AM2_2247	SK110|SK110_1598	KW10|KW10_0486	KW2|KW2_2131	MG1363|MG1363_2442	NCDO763|NCDO763_2141	N41|N41_1858	V4|V4_2367	LMG8520|LMG8520_1051	IO_1|IO1_2151	LMG8526|LMG8526_0394	KF147|KF147_2391	KF282|KF282_0317	E34|E34_1992	KF201|KF201_0914	M20|M20_0035	ATCC19435|ATCC19435_1797	KF7|KF7_1381	LMG9449|LMG9449_2748	K231|K231_0366	K337|K337_1338	KF24|KF24_0317	Li1|Li1_0336	N42|N42_2421	ML8|ML8_1145	UC317|UC317_1065	KF67|KF67_2616	LMG9446|LMG9446_1418	KF146|KF146_0924	KF134|KF134_2041	KF196|KF196_1384	DRA4|DRA4_1579	IL1403|IL1403_2258	CV56|CV56_2180	KLDS|KLDS_2371	LMG14418|LMG14418_1672	P7266|P7266_1303	44	1
OG_1262	FIG00755819: hypothetical protein	A76|A76_2427	UC509_9|UC5099_2172	FG2|FG2_0040	HP|HP_0871	LMG6897|LMG6897_0896	B40|B40_1680	SK11|SK11_2411	AM2|AM2_2243	SK110|SK110_1602	KW10|KW10_0490	KW2|KW2_2135	MG1363|MG1363_2446	NCDO763|NCDO763_2137	N41|N41_1854	V4|V4_2363	LMG8520|LMG8520_1055	IO_1|IO1_2155	LMG8526|LMG8526_0398	KF147|KF147_2396	KF282|KF282_0322	E34|E34_1987	KF201|KF201_0908	M20|M20_0041	ATCC19435|ATCC19435_1792	KF7|KF7_1385	LMG9449|LMG9449_2743	K231|K231_0371	K337|K337_1343	KF24|KF24_0322	Li1|Li1_0341	N42|N42_2425	ML8|ML8_1150	UC317|UC317_1070	KF67|KF67_2612	LMG9446|LMG9446_1422	KF146|KF146_0928	KF134|KF134_2045	KF196|KF196_1388	DRA4|DRA4_1583	IL1403|IL1403_2262	CV56|CV56_2185	KLDS|KLDS_2375	LMG14418|LMG14418_1668		43	FALSE
OG_1263	SSU ribosomal protein S3p (S3e)	A76|A76_2435	UC509_9|UC5099_2180	FG2|FG2_0032	HP|HP_0879	LMG6897|LMG6897_0904	B40|B40_1672	SK11|SK11_2419	AM2|AM2_2235	SK110|SK110_1610	KW10|KW10_0498	KW2|KW2_2143	MG1363|MG1363_2455	NCDO763|NCDO763_2128	N41|N41_1846	V4|V4_2355	LMG8520|LMG8520_1063	IO_1|IO1_2163	LMG8526|LMG8526_0406	KF147|KF147_2404	KF282|KF282_0330	E34|E34_1979	KF201|KF201_0900	M20|M20_0049	ATCC19435|ATCC19435_1784	KF7|KF7_1393	LMG9449|LMG9449_2735	K231|K231_0379	K337|K337_1351	KF24|KF24_0330	Li1|Li1_0349	N42|N42_2433	ML8|ML8_1158	UC317|UC317_1078	KF67|KF67_2604	LMG9446|LMG9446_1430	KF146|KF146_0936	KF134|KF134_2053	KF196|KF196_1396	DRA4|DRA4_1591	IL1403|IL1403_2270	CV56|CV56_2193	KLDS|KLDS_2383	LMG14418|LMG14418_1660	P7266|P7266_1290	44	1
OG_1264	LSU ribosomal protein L22p (L17e)	A76|A76_2436	UC509_9|UC5099_2181	FG2|FG2_0031	HP|HP_0880	LMG6897|LMG6897_0905	B40|B40_1671	SK11|SK11_2420	AM2|AM2_2234	SK110|SK110_1611	KW10|KW10_0499	KW2|KW2_2144	MG1363|MG1363_2456	NCDO763|NCDO763_2127	N41|N41_1845	V4|V4_2354	LMG8520|LMG8520_1064	IO_1|IO1_2164	LMG8526|LMG8526_0407	KF147|KF147_2405	KF282|KF282_0331	E34|E34_1978	KF201|KF201_0899	M20|M20_0050	ATCC19435|ATCC19435_1783	KF7|KF7_1394	LMG9449|LMG9449_2734	K231|K231_0380	K337|K337_1352	KF24|KF24_0331	Li1|Li1_0350	N42|N42_2434	ML8|ML8_1159	UC317|UC317_1079	KF67|KF67_2603	LMG9446|LMG9446_1431	KF146|KF146_0937	KF134|KF134_2054	KF196|KF196_1397	DRA4|DRA4_1592	IL1403|IL1403_2271	CV56|CV56_2194	KLDS|KLDS_2384	LMG14418|LMG14418_1659	P7266|P7266_1289	44	1
OG_1265	SSU ribosomal protein S19p (S15e)	A76|A76_2437	UC509_9|UC5099_2182	FG2|FG2_0030	HP|HP_0881	LMG6897|LMG6897_0906	B40|B40_1670	SK11|SK11_2421	AM2|AM2_2233	SK110|SK110_1612	KW10|KW10_0500	KW2|KW2_2145	MG1363|MG1363_2457	NCDO763|NCDO763_2126	N41|N41_1844	V4|V4_2353	LMG8520|LMG8520_1065	IO_1|IO1_2165	LMG8526|LMG8526_0408	KF147|KF147_2406	KF282|KF282_0332	E34|E34_1977	KF201|KF201_0898	M20|M20_0051	ATCC19435|ATCC19435_1782	KF7|KF7_1395	LMG9449|LMG9449_2733	K231|K231_0381	K337|K337_1353	KF24|KF24_0332	Li1|Li1_0351	N42|N42_2435	ML8|ML8_1160	UC317|UC317_1080	KF67|KF67_2602	LMG9446|LMG9446_1432	KF146|KF146_0938	KF134|KF134_2055	KF196|KF196_1398	DRA4|DRA4_1593	IL1403|IL1403_2272	CV56|CV56_2195	KLDS|KLDS_2385	LMG14418|LMG14418_1658	P7266|P7266_1288	44	1
OG_1266	LSU ribosomal protein L2p (L8e)	A76|A76_2438	UC509_9|UC5099_2183	FG2|FG2_0029	HP|HP_0882	LMG6897|LMG6897_0907	B40|B40_1669	SK11|SK11_2422	AM2|AM2_2232	SK110|SK110_1613	KW10|KW10_0501	KW2|KW2_2146	MG1363|MG1363_2458	NCDO763|NCDO763_2125	N41|N41_1843	V4|V4_2352	LMG8520|LMG8520_1066	IO_1|IO1_2166	LMG8526|LMG8526_0409	KF147|KF147_2407	KF282|KF282_0333	E34|E34_1976	KF201|KF201_0897	M20|M20_0052	ATCC19435|ATCC19435_1781	KF7|KF7_1396	LMG9449|LMG9449_2732	K231|K231_0382	K337|K337_1354	KF24|KF24_0333	Li1|Li1_0352	N42|N42_2436	ML8|ML8_1161	UC317|UC317_1081	KF67|KF67_2601	LMG9446|LMG9446_1433	KF146|KF146_0939	KF134|KF134_2056	KF196|KF196_1399	DRA4|DRA4_1594	IL1403|IL1403_2273	CV56|CV56_2196	KLDS|KLDS_2386	LMG14418|LMG14418_1657	P7266|P7266_1287	44	1
OG_1267	LSU ribosomal protein L23p (L23Ae)	A76|A76_2439	UC509_9|UC5099_2184	FG2|FG2_0028	HP|HP_0883	LMG6897|LMG6897_0908	B40|B40_1668	SK11|SK11_2423	AM2|AM2_2231	SK110|SK110_1614	KW10|KW10_0502	KW2|KW2_2147	MG1363|MG1363_2459	NCDO763|NCDO763_2124	N41|N41_1842	V4|V4_2351	LMG8520|LMG8520_1067	IO_1|IO1_2167	LMG8526|LMG8526_0410	KF147|KF147_2408	KF282|KF282_0334	E34|E34_1975	KF201|KF201_0896	M20|M20_0053	ATCC19435|ATCC19435_1780	KF7|KF7_1397	LMG9449|LMG9449_2731	K231|K231_0383	K337|K337_1355	KF24|KF24_0334	Li1|Li1_0353	N42|N42_2437	ML8|ML8_1162	UC317|UC317_1082	KF67|KF67_2600	LMG9446|LMG9446_1434	KF146|KF146_0940	KF134|KF134_2057	KF196|KF196_1400	DRA4|DRA4_1595	IL1403|IL1403_2274	CV56|CV56_2197	KLDS|KLDS_2387	LMG14418|LMG14418_1656	P7266|P7266_1286	44	1
OG_1268	LSU ribosomal protein L4p (L1e)	A76|A76_2440	UC509_9|UC5099_2185	FG2|FG2_0027	HP|HP_0884	LMG6897|LMG6897_0909	B40|B40_1667	SK11|SK11_2424	AM2|AM2_2230	SK110|SK110_1615	KW10|KW10_0503	KW2|KW2_2148	MG1363|MG1363_2460	NCDO763|NCDO763_2123	N41|N41_1841	V4|V4_2350	LMG8520|LMG8520_1068	IO_1|IO1_2168	LMG8526|LMG8526_0411	KF147|KF147_2409	KF282|KF282_0335	E34|E34_1974	KF201|KF201_0895	M20|M20_0054	ATCC19435|ATCC19435_1779	KF7|KF7_1398	LMG9449|LMG9449_2730	K231|K231_0384	K337|K337_1356	KF24|KF24_0335	Li1|Li1_0354	N42|N42_2438	ML8|ML8_1163	UC317|UC317_1083	KF67|KF67_2599	LMG9446|LMG9446_1435	KF146|KF146_0941	KF134|KF134_2058	KF196|KF196_1401	DRA4|DRA4_1596	IL1403|IL1403_2275	CV56|CV56_2198	KLDS|KLDS_2388	LMG14418|LMG14418_1655	P7266|P7266_1285	44	1
OG_1269	LSU ribosomal protein L3p (L3e)	A76|A76_2441	UC509_9|UC5099_2186	FG2|FG2_0026	HP|HP_0885	LMG6897|LMG6897_0910	B40|B40_1666	SK11|SK11_2426	AM2|AM2_2229	SK110|SK110_1616	KW10|KW10_0504	KW2|KW2_2149	MG1363|MG1363_2461	NCDO763|NCDO763_2122	N41|N41_1840	V4|V4_2349	LMG8520|LMG8520_1069	IO_1|IO1_2169	LMG8526|LMG8526_0412	KF147|KF147_2410	KF282|KF282_0336	E34|E34_1973	KF201|KF201_0894	M20|M20_0055	ATCC19435|ATCC19435_1778	KF7|KF7_1399	LMG9449|LMG9449_2729	K231|K231_0385	K337|K337_1357	KF24|KF24_0336	Li1|Li1_0355	N42|N42_2439	ML8|ML8_1164	UC317|UC317_1084	KF67|KF67_2598	LMG9446|LMG9446_1436	KF146|KF146_0942	KF134|KF134_2059	KF196|KF196_1402	DRA4|DRA4_1597	IL1403|IL1403_2276	CV56|CV56_2199	KLDS|KLDS_2389	LMG14418|LMG14418_1654	P7266|P7266_1284	44	1
OG_127	Chitinase (EC 3.2.1.14)	A76|A76_2233	UC509_9|UC5099_2012	FG2|FG2_1753	HP|HP_1516	LMG6897|LMG6897_2235	B40|B40_1228	SK11|SK11_2230	AM2|AM2_0253 AM2|AM2_0252	SK110|SK110_1303	KW10|KW10_0360	KW2|KW2_1989	MG1363|MG1363_2279	NCDO763|NCDO763_0611	N41|N41_1460	V4|V4_0907	LMG8520|LMG8520_0017 LMG8520|LMG8520_0018	IO_1|IO1_2022	LMG8526|LMG8526_0193	KF147|KF147_2189	KF282|KF282_0184	E34|E34_2122	KF201|KF201_1050	M20|M20_2377	ATCC19435|ATCC19435_1609	KF7|KF7_1242	LMG9449|LMG9449_0030 LMG9449|LMG9449_0028	K231|K231_0205	K337|K337_1206	KF24|KF24_0157	Li1|Li1_0176	N42|N42_2287 N42|N42_2288	ML8|ML8_0931	UC317|UC317_2366	KF67|KF67_1490	LMG9446|LMG9446_1285	KF146|KF146_1076	KF134|KF134_1910	KF196|KF196_1221	DRA4|DRA4_0733	IL1403|IL1403_2114	CV56|CV56_2043	KLDS|KLDS_2212	LMG14418|LMG14418_1808		43	FALSE
OG_1270	Late competence protein ComGE, FIG075573	A76|A76_2462	UC509_9|UC5099_2208	FG2|FG2_0238	HP|HP_2322	LMG6897|LMG6897_0953	B40|B40_0788	SK11|SK11_2448	AM2|AM2_1912	SK110|SK110_1637	KW10|KW10_0526	KW2|KW2_2171	MG1363|MG1363_2485	NCDO763|NCDO763_0802	N41|N41_2354	V4|V4_2327		IO_1|IO1_2191	LMG8526|LMG8526_0432	KF147|KF147_2430	KF282|KF282_0356	E34|E34_1953	KF201|KF201_0874	M20|M20_0076	ATCC19435|ATCC19435_1756	KF7|KF7_2350	LMG9449|LMG9449_0375	K231|K231_2304	K337|K337_1377	KF24|KF24_1429	Li1|Li1_0376	N42|N42_2114	ML8|ML8_1105	UC317|UC317_1970	KF67|KF67_2579	LMG9446|LMG9446_1455	KF146|KF146_0961	KF134|KF134_2078	KF196|KF196_1421	DRA4|DRA4_2169	IL1403|IL1403_2295	CV56|CV56_2218	KLDS|KLDS_2409	LMG14418|LMG14418_1287	P7266|P7266_1266	43	FALSE
OG_1271	hypothetical protein	A76|A76_2470	UC509_9|UC5099_2214	FG2|FG2_0244	HP|HP_2328	LMG6897|LMG6897_0959	B40|B40_0794	SK11|SK11_2458	AM2|AM2_1906	SK110|SK110_1140	KW10|KW10_0532	KW2|KW2_2177	MG1363|MG1363_2491	NCDO763|NCDO763_0808	N41|N41_2348	V4|V4_2321	LMG8520|LMG8520_1097	IO_1|IO1_2199	LMG8526|LMG8526_0438	KF147|KF147_2438	KF282|KF282_0115	E34|E34_1947	KF201|KF201_0868	M20|M20_0082	ATCC19435|ATCC19435_1750	KF7|KF7_2344	LMG9449|LMG9449_0369	K231|K231_2298	K337|K337_1383	KF24|KF24_2611	Li1|Li1_0383	N42|N42_1287	ML8|ML8_1904	UC317|UC317_2286	KF67|KF67_2321	LMG9446|LMG9446_1461	KF146|KF146_0967	KF134|KF134_2084	KF196|KF196_1427	DRA4|DRA4_1257	IL1403|IL1403_2301	CV56|CV56_2277	KLDS|KLDS_2462	LMG14418|LMG14418_1281		43	FALSE
OG_1272	NADH oxidase	A76|A76_2471	UC509_9|UC5099_2216	FG2|FG2_0245	HP|HP_2329	LMG6897|LMG6897_0960	B40|B40_0795	SK11|SK11_2459	AM2|AM2_1905	SK110|SK110_1141	KW10|KW10_0533	KW2|KW2_2178	MG1363|MG1363_2493	NCDO763|NCDO763_0810	N41|N41_2347	V4|V4_2320	LMG8520|LMG8520_1098	IO_1|IO1_2200	LMG8526|LMG8526_0439	KF147|KF147_2439	KF282|KF282_0114	E34|E34_1946	KF201|KF201_0867	M20|M20_0083	ATCC19435|ATCC19435_1749	KF7|KF7_2343	LMG9449|LMG9449_0368	K231|K231_2297	K337|K337_1384	KF24|KF24_2610	Li1|Li1_0384	N42|N42_1288	ML8|ML8_1905	UC317|UC317_2287	KF67|KF67_2320	LMG9446|LMG9446_1462	KF146|KF146_0968	KF134|KF134_2085	KF196|KF196_1428	DRA4|DRA4_1258	IL1403|IL1403_2302	CV56|CV56_2278	KLDS|KLDS_2463	LMG14418|LMG14418_1280	P7266|P7266_0938	44	1
OG_1273	Serine protease, DegP/HtrA, do-like (EC3.4.21.-)	A76|A76_2482	UC509_9|UC5099_2226	FG2|FG2_2324	HP|HP_2337	LMG6897|LMG6897_0969	B40|B40_0803	SK11|SK11_2468	AM2|AM2_1896	SK110|SK110_1149	KW10|KW10_0542	KW2|KW2_2186	MG1363|MG1363_2501	NCDO763|NCDO763_0819	N41|N41_2338	V4|V4_2312	LMG8520|LMG8520_1106	IO_1|IO1_2208	LMG8526|LMG8526_0448	KF147|KF147_2447	KF282|KF282_0105	E34|E34_1938	KF201|KF201_0858	M20|M20_0092	ATCC19435|ATCC19435_1740	KF7|KF7_2335	LMG9449|LMG9449_0358	K231|K231_2289	K337|K337_1393	KF24|KF24_2601	Li1|Li1_0392	N42|N42_1298	ML8|ML8_1913	UC317|UC317_2296	KF67|KF67_2311	LMG9446|LMG9446_1471	KF146|KF146_0977	KF134|KF134_2094	KF196|KF196_1437	DRA4|DRA4_1266	IL1403|IL1403_2312	CV56|CV56_2286	KLDS|KLDS_2472	LMG14418|LMG14418_1272	P7266|P7266_1252	44	1
OG_1274	Hydrolase (HAD superfamily)	A76|A76_2489	UC509_9|UC5099_2235	FG2|FG2_2316	HP|HP_2345	LMG6897|LMG6897_0977	B40|B40_0810	SK11|SK11_2475	AM2|AM2_1889	SK110|SK110_1156	KW10|KW10_0549	KW2|KW2_2194	MG1363|MG1363_2509	NCDO763|NCDO763_0826	N41|N41_2331	V4|V4_2304	LMG8520|LMG8520_1113	IO_1|IO1_2215	LMG8526|LMG8526_2187	KF147|KF147_2454	KF282|KF282_0098	E34|E34_1931	KF201|KF201_0851	M20|M20_0099	ATCC19435|ATCC19435_1733	KF7|KF7_2328	LMG9449|LMG9449_0351	K231|K231_2282	K337|K337_1400	KF24|KF24_2594	Li1|Li1_0399	N42|N42_1305	ML8|ML8_1920	UC317|UC317_2303	KF67|KF67_2304	LMG9446|LMG9446_1478	KF146|KF146_0984	KF134|KF134_2101	KF196|KF196_1444	DRA4|DRA4_1273	IL1403|IL1403_2319	CV56|CV56_2293	KLDS|KLDS_2480	LMG14418|LMG14418_1265	P7266|P7266_0524	44	1
OG_1275	COG1399 protein in cluster with ribosomalprotein L32p, Firmicutes subfamily	A76|A76_0915	UC509_9|UC5099_1622	FG2|FG2_1816	HP|HP_2214	LMG6897|LMG6897_0303	B40|B40_1488	SK11|SK11_1730	AM2|AM2_0944	SK110|SK110_0116	KW10|KW10_2235	KW2|KW2_1545	MG1363|MG1363_0933	NCDO763|NCDO763_1743	N41|N41_2407	V4|V4_0630	LMG8520|LMG8520_0444	IO_1|IO1_1583	LMG8526|LMG8526_1866	KF147|KF147_1796	KF282|KF282_0925	E34|E34_0585	KF201|KF201_2173	M20|M20_0123	ATCC19435|ATCC19435_1525	KF7|KF7_0979	LMG9449|LMG9449_0604	K231|K231_1187	K337|K337_1070	KF24|KF24_0103	Li1|Li1_2436	N42|N42_0621	ML8|ML8_0510	UC317|UC317_1002	KF67|KF67_2455	LMG9446|LMG9446_2366	KF146|KF146_1507	KF134|KF134_1283	KF196|KF196_0666	DRA4|DRA4_0268	IL1403|IL1403_1727	CV56|CV56_1600	KLDS|KLDS_1718	LMG14418|LMG14418_0856	P7266|P7266_1091	44	1
OG_1276	putative membrane protein	A76|A76_0900	UC509_9|UC5099_1631	FG2|FG2_2531	HP|HP_0227	LMG6897|LMG6897_0943	B40|B40_1029	SK11|SK11_1741	AM2|AM2_0954	SK110|SK110_0104	KW10|KW10_0325	KW2|KW2_1561	MG1363|MG1363_0915	NCDO763|NCDO763_0009	N41|N41_1986	V4|V4_1316	LMG8520|LMG8520_0455	IO_1|IO1_1594	LMG8526|LMG8526_1932	KF147|KF147_1807	KF282|KF282_0850	E34|E34_0596	KF201|KF201_2162	M20|M20_0134	ATCC19435|ATCC19435_2016	KF7|KF7_0771	LMG9449|LMG9449_0615	K231|K231_2084	K337|K337_2250	KF24|KF24_0114	Li1|Li1_0112	N42|N42_1642	ML8|ML8_0520	UC317|UC317_0991	KF67|KF67_0671	LMG9446|LMG9446_2092	KF146|KF146_1534	KF134|KF134_2319	KF196|KF196_2256	DRA4|DRA4_0280	IL1403|IL1403_1737	CV56|CV56_1610	KLDS|KLDS_1783	LMG14418|LMG14418_0223		43	FALSE
OG_1277	dihydroxyacetone kinase family protein	A76|A76_0291	UC509_9|UC5099_0252	FG2|FG2_1468	HP|HP_0037	LMG6897|LMG6897_0517	B40|B40_2235	SK11|SK11_0243	AM2|AM2_2384	SK110|SK110_1055	KW10|KW10_1626	KW2|KW2_0228	MG1363|MG1363_0260	NCDO763|NCDO763_0347	N41|N41_0310	V4|V4_2251	LMG8520|LMG8520_0137	IO_1|IO1_0217	LMG8526|LMG8526_0142	KF147|KF147_0249	KF282|KF282_0461	E34|E34_0163	KF201|KF201_0172	M20|M20_0194	ATCC19435|ATCC19435_0956	KF7|KF7_0708	LMG9449|LMG9449_1170	K231|K231_1614	K337|K337_0382	KF24|KF24_1111	Li1|Li1_1976	N42|N42_0175	ML8|ML8_0646	UC317|UC317_0160	KF67|KF67_0307	LMG9446|LMG9446_0940	KF146|KF146_0299	KF134|KF134_1334	KF196|KF196_2315	DRA4|DRA4_0990	IL1403|IL1403_0275	CV56|CV56_0270	KLDS|KLDS_0295	LMG14418|LMG14418_2109		43	FALSE
OG_1278	Transcriptional regulator, TetR family	A76|A76_0292	UC509_9|UC5099_0253	FG2|FG2_1469	HP|HP_0038	LMG6897|LMG6897_0516	B40|B40_2236	SK11|SK11_0245	AM2|AM2_2383	SK110|SK110_1057	KW10|KW10_1625	KW2|KW2_0229	MG1363|MG1363_0262	NCDO763|NCDO763_0349	N41|N41_0312	V4|V4_2252	LMG8520|LMG8520_0135	IO_1|IO1_0218	LMG8526|LMG8526_0141	KF147|KF147_0250	KF282|KF282_0462	E34|E34_0162	KF201|KF201_0173	M20|M20_0195	ATCC19435|ATCC19435_0957	KF7|KF7_0709	LMG9449|LMG9449_1169	K231|K231_1613	K337|K337_0383	KF24|KF24_1112	Li1|Li1_1977	N42|N42_0176	ML8|ML8_0645	UC317|UC317_0161	KF67|KF67_0306	LMG9446|LMG9446_0939	KF146|KF146_0300	KF134|KF134_1333	KF196|KF196_2314	DRA4|DRA4_0988	IL1403|IL1403_0276	CV56|CV56_0271	KLDS|KLDS_0296	LMG14418|LMG14418_2108		43	FALSE
OG_1279	Phosphoenolpyruvate-dihydroxyacetonephosphotransferase (EC 2.7.1.121), ADP-binding subunitDhaL	A76|A76_0294	UC509_9|UC5099_0255	FG2|FG2_1471	HP|HP_0040	LMG6897|LMG6897_0514	B40|B40_2238	SK11|SK11_0248	AM2|AM2_2381	SK110|SK110_1060	KW10|KW10_1623	KW2|KW2_0231	MG1363|MG1363_0265	NCDO763|NCDO763_0352	N41|N41_0314	V4|V4_2254	LMG8520|LMG8520_0133	IO_1|IO1_0220	LMG8526|LMG8526_0139	KF147|KF147_0252	KF282|KF282_0464	E34|E34_0160	KF201|KF201_0175	M20|M20_0197	ATCC19435|ATCC19435_0959	KF7|KF7_0711	LMG9449|LMG9449_1167	K231|K231_1611	K337|K337_0385	KF24|KF24_1114	Li1|Li1_1979	N42|N42_0178	ML8|ML8_0643	UC317|UC317_0163	KF67|KF67_0304	LMG9446|LMG9446_0937	KF146|KF146_0302	KF134|KF134_1331	KF196|KF196_2312	DRA4|DRA4_0985	IL1403|IL1403_0278	CV56|CV56_0273	KLDS|KLDS_0298	LMG14418|LMG14418_2106		43	FALSE
OG_128	PTS system, sucrose-specific IIB component (EC2.7.1.69) / PTS system, sucrose-specific IIC component(EC 2.7.1.69)	A76|A76_1251	UC509_9|UC5099_1198	FG2|FG2_2214	HP|HP_1413	LMG6897|LMG6897_1294	B40|B40_0447	SK11|SK11_1247	AM2|AM2_1981	SK110|SK110_1237	KW10|KW10_1286	KW2|KW2_1064	MG1363|MG1363_1479	NCDO763|NCDO763_2486	N41|N41_1589	V4|V4_1835	LMG8520|LMG8520_0233	IO_1|IO1_1078	LMG8526|LMG8526_1572	KF147|KF147_1198	KF282|KF282_2044	E34|E34_0076	KF201|KF201_1480	M20|M20_2532	ATCC19435|ATCC19435_2250	KF7|KF7_1637 KF7|KF7_1636	LMG9449|LMG9449_1743	K231|K231_0440	K337|K337_1519	KF24|KF24_1640	Li1|Li1_0621	N42|N42_1162 N42|N42_1161	ML8|ML8_0742	UC317|UC317_2186	KF67|KF67_0461	LMG9446|LMG9446_0334	KF146|KF146_1442 KF146|KF146_1441	KF134|KF134_0161	KF196|KF196_0607	DRA4|DRA4_1788	IL1403|IL1403_1219	CV56|CV56_1177	KLDS|KLDS_1190	LMG14418|LMG14418_2043	P7266|P7266_1479	44	1
OG_1280	ABC transporter permease protein	A76|A76_0299	UC509_9|UC5099_0261	FG2|FG2_1476	HP|HP_0045	LMG6897|LMG6897_0509	B40|B40_2243	SK11|SK11_0255	AM2|AM2_2374	SK110|SK110_1067	KW10|KW10_1618	KW2|KW2_0238	MG1363|MG1363_0272	NCDO763|NCDO763_0359	N41|N41_0321	V4|V4_2259	LMG8520|LMG8520_0126	IO_1|IO1_0225	LMG8526|LMG8526_0133	KF147|KF147_0257	KF282|KF282_0470	E34|E34_0152	KF201|KF201_0181	M20|M20_0203	ATCC19435|ATCC19435_0965	KF7|KF7_0718	LMG9449|LMG9449_1160	K231|K231_1605	K337|K337_0391	KF24|KF24_1120	Li1|Li1_1985	N42|N42_0184	ML8|ML8_0637	UC317|UC317_0169	KF67|KF67_0298	LMG9446|LMG9446_0931	KF146|KF146_0308	KF134|KF134_1325	KF196|KF196_2306	DRA4|DRA4_0978	IL1403|IL1403_0284	CV56|CV56_0280	KLDS|KLDS_0305	LMG14418|LMG14418_2099		43	FALSE
OG_1281	LSU m5C1962 methyltransferase RlmI	A76|A76_0301	UC509_9|UC5099_0262	FG2|FG2_1477	HP|HP_0046	LMG6897|LMG6897_0508	B40|B40_2244	SK11|SK11_0256	AM2|AM2_2373	SK110|SK110_1068	KW10|KW10_1617	KW2|KW2_0239	MG1363|MG1363_0273	NCDO763|NCDO763_0360	N41|N41_0322	V4|V4_2260	LMG8520|LMG8520_0125	IO_1|IO1_0226	LMG8526|LMG8526_0132	KF147|KF147_0258	KF282|KF282_0471	E34|E34_0151	KF201|KF201_0182	M20|M20_0204	ATCC19435|ATCC19435_0966	KF7|KF7_0719	LMG9449|LMG9449_1158	K231|K231_1604	K337|K337_0392	KF24|KF24_1121	Li1|Li1_1986	N42|N42_0185	ML8|ML8_0636	UC317|UC317_0170	KF67|KF67_0297	LMG9446|LMG9446_0930	KF146|KF146_0309	KF134|KF134_1324	KF196|KF196_2305	DRA4|DRA4_0977	IL1403|IL1403_0285	CV56|CV56_0281	KLDS|KLDS_0306	LMG14418|LMG14418_2098	P7266|P7266_0872	44	1
OG_1282	oxidoreductase of aldo/keto reductase family,subgroup 1	A76|A76_0313	UC509_9|UC5099_0276	FG2|FG2_1168	HP|HP_1939	LMG6897|LMG6897_1457	B40|B40_0126	SK11|SK11_0269	AM2|AM2_2361	SK110|SK110_2504	KW10|KW10_1549	KW2|KW2_0251	MG1363|MG1363_0286	NCDO763|NCDO763_1093	N41|N41_0977	V4|V4_1922	LMG8520|LMG8520_1153	IO_1|IO1_0239	LMG8526|LMG8526_0120	KF147|KF147_0273	KF282|KF282_0483	E34|E34_0139	KF201|KF201_0194	M20|M20_0216	ATCC19435|ATCC19435_0979	KF7|KF7_0731	LMG9449|LMG9449_1145	K231|K231_1591	K337|K337_0404	KF24|KF24_1133	Li1|Li1_1999	N42|N42_0200	ML8|ML8_0622	UC317|UC317_0184	KF67|KF67_0283	LMG9446|LMG9446_0916	KF146|KF146_0337	KF134|KF134_1311	KF196|KF196_2292	DRA4|DRA4_0067	IL1403|IL1403_0298	CV56|CV56_0296	KLDS|KLDS_0320	LMG14418|LMG14418_2082	P7266|P7266_0532	44	1
OG_1283	Nicotinamidase (EC 3.5.1.19)	A76|A76_0314	UC509_9|UC5099_0277	FG2|FG2_1169	HP|HP_1940	LMG6897|LMG6897_1458	B40|B40_0125	SK11|SK11_0270	AM2|AM2_2360	SK110|SK110_2505	KW10|KW10_1548	KW2|KW2_0252	MG1363|MG1363_0287	NCDO763|NCDO763_1092	N41|N41_0978	V4|V4_1923	LMG8520|LMG8520_1152	IO_1|IO1_0240	LMG8526|LMG8526_0119	KF147|KF147_0274	KF282|KF282_0484	E34|E34_0138	KF201|KF201_0195	M20|M20_0217	ATCC19435|ATCC19435_0980	KF7|KF7_0732	LMG9449|LMG9449_1144	K231|K231_1590	K337|K337_0405	KF24|KF24_1134	Li1|Li1_2000	N42|N42_0201	ML8|ML8_0621	UC317|UC317_0185	KF67|KF67_0282	LMG9446|LMG9446_0915	KF146|KF146_0338	KF134|KF134_1310	KF196|KF196_2291	DRA4|DRA4_0068	IL1403|IL1403_0299	CV56|CV56_0297	KLDS|KLDS_0321	LMG14418|LMG14418_2081	P7266|P7266_0531	44	1
OG_1284	FIG00756249: hypothetical protein		UC509_9|UC5099_0283	FG2|FG2_1175	HP|HP_1946	LMG6897|LMG6897_1464	B40|B40_0119	SK11|SK11_0277	AM2|AM2_2354	SK110|SK110_0924	KW10|KW10_1542	KW2|KW2_0258	MG1363|MG1363_0293	NCDO763|NCDO763_1086	N41|N41_0985	V4|V4_1929	LMG8520|LMG8520_1145	IO_1|IO1_0246	LMG8526|LMG8526_0113	KF147|KF147_0280	KF282|KF282_0491	E34|E34_0132	KF201|KF201_0201	M20|M20_0223	ATCC19435|ATCC19435_0986	KF7|KF7_0738	LMG9449|LMG9449_1138	K231|K231_1584	K337|K337_0411	KF24|KF24_1140	Li1|Li1_2006	N42|N42_0207	ML8|ML8_0615	UC317|UC317_0191	KF67|KF67_0276	LMG9446|LMG9446_0909	KF146|KF146_0344	KF134|KF134_1304	KF196|KF196_2285	DRA4|DRA4_0075	IL1403|IL1403_0305	CV56|CV56_0303	KLDS|KLDS_0327	LMG14418|LMG14418_2075	P7266|P7266_0527	43	FALSE
OG_1285	Ribonuclease J1 (endonuclease and 5'exonuclease)	A76|A76_0337	UC509_9|UC5099_0306	FG2|FG2_1278	HP|HP_0821	LMG6897|LMG6897_1251	B40|B40_0097	SK11|SK11_0316	AM2|AM2_0782	SK110|SK110_1723	KW10|KW10_1521	KW2|KW2_0279	MG1363|MG1363_0315	NCDO763|NCDO763_1065	N41|N41_1014	V4|V4_1950	LMG8520|LMG8520_1126	IO_1|IO1_0263	LMG8526|LMG8526_0095	KF147|KF147_0352	KF282|KF282_0507	E34|E34_1345	KF201|KF201_0218	M20|M20_0257	ATCC19435|ATCC19435_1003	KF7|KF7_0158	LMG9449|LMG9449_1121	K231|K231_1556	K337|K337_0429	KF24|KF24_1159	Li1|Li1_2024	N42|N42_0225	ML8|ML8_0147	UC317|UC317_0208	KF67|KF67_0258	LMG9446|LMG9446_0882	KF146|KF146_0381	KF134|KF134_1067	KF196|KF196_0204	DRA4|DRA4_1738	IL1403|IL1403_0324	CV56|CV56_0320	KLDS|KLDS_0361	LMG14418|LMG14418_1016	P7266|P7266_0500	44	1
OG_1286	Protein of unknown function DUF1447	A76|A76_0338	UC509_9|UC5099_0307	FG2|FG2_1277	HP|HP_0820	LMG6897|LMG6897_1250	B40|B40_0096	SK11|SK11_0317	AM2|AM2_0781	SK110|SK110_1722	KW10|KW10_1520	KW2|KW2_0280	MG1363|MG1363_0316	NCDO763|NCDO763_1064	N41|N41_1015	V4|V4_1951	LMG8520|LMG8520_1125	IO_1|IO1_0264	LMG8526|LMG8526_0094	KF147|KF147_0353	KF282|KF282_0508	E34|E34_1344	KF201|KF201_0219	M20|M20_0258	ATCC19435|ATCC19435_1004	KF7|KF7_0159	LMG9449|LMG9449_1120	K231|K231_1555	K337|K337_0430	KF24|KF24_1160	Li1|Li1_2025	N42|N42_0226	ML8|ML8_0146	UC317|UC317_0209	KF67|KF67_0257	LMG9446|LMG9446_0881	KF146|KF146_0382	KF134|KF134_1066	KF196|KF196_0205	DRA4|DRA4_1737	IL1403|IL1403_0325	CV56|CV56_0321	KLDS|KLDS_0362	LMG14418|LMG14418_1015	P7266|P7266_0499	44	1
OG_1287	Inactive homolog of metal-dependent proteases,putative molecular chaperone	A76|A76_0340	UC509_9|UC5099_0309	FG2|FG2_1275	HP|HP_0818	LMG6897|LMG6897_1248	B40|B40_0094	SK11|SK11_0319	AM2|AM2_0780	SK110|SK110_1720	KW10|KW10_1518	KW2|KW2_0282	MG1363|MG1363_0318	NCDO763|NCDO763_1062	N41|N41_1017	V4|V4_1953	LMG8520|LMG8520_1124	IO_1|IO1_0266	LMG8526|LMG8526_0093	KF147|KF147_0354	KF282|KF282_0509	E34|E34_1343	KF201|KF201_0220	M20|M20_0259	ATCC19435|ATCC19435_1005	KF7|KF7_0160	LMG9449|LMG9449_1119	K231|K231_1554	K337|K337_0431	KF24|KF24_1161	Li1|Li1_2026	N42|N42_0227	ML8|ML8_0145	UC317|UC317_0210	KF67|KF67_0256	LMG9446|LMG9446_0880	KF146|KF146_0383	KF134|KF134_1065	KF196|KF196_0206	DRA4|DRA4_1735	IL1403|IL1403_0326	CV56|CV56_0322	KLDS|KLDS_0363	LMG14418|LMG14418_1014	P7266|P7266_0498	44	1
OG_1288	Ribosomal-protein-S18p-alanineacetyltransferase (EC 2.3.1.-)	A76|A76_0341	UC509_9|UC5099_0310	FG2|FG2_1274	HP|HP_0817	LMG6897|LMG6897_1247	B40|B40_0093	SK11|SK11_0320	AM2|AM2_0779	SK110|SK110_1719	KW10|KW10_1517	KW2|KW2_0283	MG1363|MG1363_0319	NCDO763|NCDO763_1061	N41|N41_1018	V4|V4_1954	LMG8520|LMG8520_1123	IO_1|IO1_0267	LMG8526|LMG8526_0092	KF147|KF147_0355	KF282|KF282_0510	E34|E34_1342	KF201|KF201_0221	M20|M20_0260	ATCC19435|ATCC19435_1006	KF7|KF7_0161	LMG9449|LMG9449_1118	K231|K231_1553	K337|K337_0432	KF24|KF24_1162	Li1|Li1_2027	N42|N42_0228	ML8|ML8_0144	UC317|UC317_0211	KF67|KF67_0255	LMG9446|LMG9446_0879	KF146|KF146_0384	KF134|KF134_1064	KF196|KF196_0207	DRA4|DRA4_1734	IL1403|IL1403_0327	CV56|CV56_0323	KLDS|KLDS_0364	LMG14418|LMG14418_1013	P7266|P7266_0497	44	1
OG_1289	Ribosomal-protein-S18p-alanineacetyltransferase (EC 2.3.1.-)	A76|A76_0342	UC509_9|UC5099_0311	FG2|FG2_1273	HP|HP_0816	LMG6897|LMG6897_1246	B40|B40_0092	SK11|SK11_0321	AM2|AM2_0778	SK110|SK110_1718	KW10|KW10_1516	KW2|KW2_0284	MG1363|MG1363_0320	NCDO763|NCDO763_1060	N41|N41_1019	V4|V4_1955	LMG8520|LMG8520_1122	IO_1|IO1_0268	LMG8526|LMG8526_0091	KF147|KF147_0356	KF282|KF282_0511	E34|E34_1341	KF201|KF201_0222	M20|M20_0261	ATCC19435|ATCC19435_1007	KF7|KF7_0162	LMG9449|LMG9449_1117	K231|K231_1552	K337|K337_0433	KF24|KF24_1163	Li1|Li1_2028	N42|N42_0229	ML8|ML8_0143	UC317|UC317_0212	KF67|KF67_0254	LMG9446|LMG9446_0878	KF146|KF146_0385	KF134|KF134_1063	KF196|KF196_0208	DRA4|DRA4_1733	IL1403|IL1403_0328	CV56|CV56_0324	KLDS|KLDS_0365	LMG14418|LMG14418_1012	P7266|P7266_0496	44	1
OG_129	Threonine dehydratase (EC 4.3.1.19)	A76|A76_1321	UC509_9|UC5099_1309	FG2|FG2_0686	HP|HP_0140	LMG6897|LMG6897_1132	B40|B40_2409	SK11|SK11_1316 SK11|SK11_1317	AM2|AM2_1807 AM2|AM2_1808	SK110|SK110_1466 SK110|SK110_1465	KW10|KW10_1171	KW2|KW2_1177	MG1363|MG1363_1329	NCDO763|NCDO763_0871	N41|N41_1169	V4|V4_1535	LMG8520|LMG8520_0638	IO_1|IO1_1166	LMG8526|LMG8526_1650	KF147|KF147_1314	KF282|KF282_1953	E34|E34_2173	KF201|KF201_1152	M20|M20_2632	ATCC19435|ATCC19435_0130	KF7|KF7_1725	LMG9449|LMG9449_1394	K231|K231_2109	K337|K337_1429	KF24|KF24_0904	Li1|Li1_0735	N42|N42_0581	ML8|ML8_0690	UC317|UC317_1901	KF67|KF67_1854	LMG9446|LMG9446_0424	KF146|KF146_0631	KF134|KF134_1738	KF196|KF196_0758	DRA4|DRA4_2536 DRA4|DRA4_2535	IL1403|IL1403_1337	CV56|CV56_1272	KLDS|KLDS_1357	LMG14418|LMG14418_0353		43	FALSE
OG_1290	TsaD/Kae1/Qri7 protein, required forthreonylcarbamoyladenosine t(6)A37 formation in tRNA	A76|A76_0343	UC509_9|UC5099_0312	FG2|FG2_1272	HP|HP_0815	LMG6897|LMG6897_1245	B40|B40_0091	SK11|SK11_0322	AM2|AM2_0777	SK110|SK110_1717	KW10|KW10_1515	KW2|KW2_0285	MG1363|MG1363_0321	NCDO763|NCDO763_1059	N41|N41_1020	V4|V4_1956	LMG8520|LMG8520_1121	IO_1|IO1_0269	LMG8526|LMG8526_0090	KF147|KF147_0357	KF282|KF282_0512	E34|E34_1340	KF201|KF201_0223	M20|M20_0262	ATCC19435|ATCC19435_1008	KF7|KF7_0163	LMG9449|LMG9449_1116	K231|K231_1551	K337|K337_0434	KF24|KF24_1164	Li1|Li1_2029	N42|N42_0230	ML8|ML8_0142	UC317|UC317_0213	KF67|KF67_0253	LMG9446|LMG9446_0877	KF146|KF146_0386	KF134|KF134_1062	KF196|KF196_0209	DRA4|DRA4_1732	IL1403|IL1403_0329	CV56|CV56_0325	KLDS|KLDS_0366	LMG14418|LMG14418_1011	P7266|P7266_0495	44	1
OG_1291	FIG00755687: hypothetical protein	A76|A76_0344	UC509_9|UC5099_0313	FG2|FG2_1271	HP|HP_0814	LMG6897|LMG6897_1244	B40|B40_0090	SK11|SK11_0323	AM2|AM2_0776	SK110|SK110_1716	KW10|KW10_1514	KW2|KW2_0286	MG1363|MG1363_0322	NCDO763|NCDO763_1058	N41|N41_1021	V4|V4_1957	LMG8520|LMG8520_1120	IO_1|IO1_0270	LMG8526|LMG8526_0089	KF147|KF147_0358	KF282|KF282_0513	E34|E34_1339	KF201|KF201_0224	M20|M20_0263	ATCC19435|ATCC19435_1009	KF7|KF7_0164	LMG9449|LMG9449_1115	K231|K231_1550	K337|K337_0435	KF24|KF24_1165	Li1|Li1_2030	N42|N42_0231	ML8|ML8_0141	UC317|UC317_0214	KF67|KF67_0252	LMG9446|LMG9446_0876	KF146|KF146_0387	KF134|KF134_1061	KF196|KF196_0210	DRA4|DRA4_1731	IL1403|IL1403_0330	CV56|CV56_0326	KLDS|KLDS_0367	LMG14418|LMG14418_1010	P7266|P7266_0494	44	1
OG_1292	FIG00755805: hypothetical protein	A76|A76_0346	UC509_9|UC5099_0315	FG2|FG2_1269	HP|HP_0812	LMG6897|LMG6897_1242	B40|B40_0088	SK11|SK11_0325	AM2|AM2_0774	SK110|SK110_1714	KW10|KW10_1512	KW2|KW2_0288	MG1363|MG1363_0324	NCDO763|NCDO763_1057	N41|N41_1023	V4|V4_1958	LMG8520|LMG8520_1118	IO_1|IO1_0275	LMG8526|LMG8526_0082	KF147|KF147_0360	KF282|KF282_0515	E34|E34_1336	KF201|KF201_0226	M20|M20_0265	ATCC19435|ATCC19435_1011	KF7|KF7_0166	LMG9449|LMG9449_1113	K231|K231_1548	K337|K337_0437	KF24|KF24_1167	Li1|Li1_2032	N42|N42_0233	ML8|ML8_0139	UC317|UC317_0216	KF67|KF67_0250	LMG9446|LMG9446_0874	KF146|KF146_0389	KF134|KF134_1059	KF196|KF196_0212	DRA4|DRA4_1729	IL1403|IL1403_0332	CV56|CV56_0328	KLDS|KLDS_0369	LMG14418|LMG14418_1008	P7266|P7266_0493	44	1
OG_1293	Transcriptional regulator	A76|A76_0371	UC509_9|UC5099_0337	FG2|FG2_1152	HP|HP_2398	LMG6897|LMG6897_2373	B40|B40_0898	SK11|SK11_0353	AM2|AM2_0755	SK110|SK110_1447	KW10|KW10_1492	KW2|KW2_0308	MG1363|MG1363_0347	NCDO763|NCDO763_1034	N41|N41_1046	V4|V4_1981	LMG8520|LMG8520_0344	IO_1|IO1_0302	LMG8526|LMG8526_0060	KF147|KF147_0384	KF282|KF282_0541	E34|E34_1313	KF201|KF201_0248	M20|M20_0287	ATCC19435|ATCC19435_1034	KF7|KF7_0187	LMG9449|LMG9449_1092	K231|K231_1529	K337|K337_0459	KF24|KF24_1188	Li1|Li1_2051	N42|N42_0252	ML8|ML8_0120	UC317|UC317_0235	KF67|KF67_0229	LMG9446|LMG9446_0855	KF146|KF146_0410	KF134|KF134_1039	KF196|KF196_0233	DRA4|DRA4_1483	IL1403|IL1403_0351	CV56|CV56_0347	KLDS|KLDS_0389	LMG14418|LMG14418_0989	P7266|P7266_0476	44	1
OG_1294	Substrate-specific component ThiT of thiaminECF transporter	A76|A76_0372	UC509_9|UC5099_0339	FG2|FG2_1151	HP|HP_2397	LMG6897|LMG6897_2372	B40|B40_0897	SK11|SK11_0354	AM2|AM2_0754	SK110|SK110_1446	KW10|KW10_1491	KW2|KW2_0309	MG1363|MG1363_0348	NCDO763|NCDO763_1033	N41|N41_1047	V4|V4_1982	LMG8520|LMG8520_0342	IO_1|IO1_0303	LMG8526|LMG8526_0059	KF147|KF147_0385	KF282|KF282_0542	E34|E34_1312	KF201|KF201_0249	M20|M20_0288	ATCC19435|ATCC19435_1035	KF7|KF7_0188	LMG9449|LMG9449_1091	K231|K231_1528	K337|K337_0460	KF24|KF24_1189	Li1|Li1_2052	N42|N42_0253	ML8|ML8_0119	UC317|UC317_0236	KF67|KF67_0228	LMG9446|LMG9446_0854	KF146|KF146_0411	KF134|KF134_1038	KF196|KF196_0234	DRA4|DRA4_1482	IL1403|IL1403_0352	CV56|CV56_0348	KLDS|KLDS_0390	LMG14418|LMG14418_0988	P7266|P7266_0475	44	1
OG_1295	Methionine ABC transporter substrate-bindingprotein	A76|A76_0374	UC509_9|UC5099_0341	FG2|FG2_1212	HP|HP_2395	LMG6897|LMG6897_2370	B40|B40_0895	SK11|SK11_0356	AM2|AM2_0751	SK110|SK110_1444	KW10|KW10_1489	KW2|KW2_0311	MG1363|MG1363_0350	NCDO763|NCDO763_1031	N41|N41_1049	V4|V4_1984	LMG8520|LMG8520_0340	IO_1|IO1_0305	LMG8526|LMG8526_0057	KF147|KF147_0387	KF282|KF282_0544	E34|E34_1310	KF201|KF201_0251	M20|M20_0290	ATCC19435|ATCC19435_1037	KF7|KF7_0190	LMG9449|LMG9449_1089	K231|K231_1526	K337|K337_0462	KF24|KF24_1192	Li1|Li1_2054	N42|N42_0255	ML8|ML8_0116	UC317|UC317_0238	KF67|KF67_0226	LMG9446|LMG9446_0852	KF146|KF146_0413	KF134|KF134_1035	KF196|KF196_0236	DRA4|DRA4_1480	IL1403|IL1403_0354	CV56|CV56_0350	KLDS|KLDS_0393	LMG14418|LMG14418_0986		43	FALSE
OG_1296	Methionine ABC transporter substrate-bindingprotein	A76|A76_0375	UC509_9|UC5099_0342	FG2|FG2_1211	HP|HP_2394	LMG6897|LMG6897_2369	B40|B40_0894	SK11|SK11_0357	AM2|AM2_0750	SK110|SK110_1443	KW10|KW10_1488	KW2|KW2_0312	MG1363|MG1363_0351	NCDO763|NCDO763_1030	N41|N41_1050	V4|V4_1985		IO_1|IO1_0306	LMG8526|LMG8526_0056	KF147|KF147_0388	KF282|KF282_0545	E34|E34_1309	KF201|KF201_0252	M20|M20_0291	ATCC19435|ATCC19435_1038	KF7|KF7_0191	LMG9449|LMG9449_1088	K231|K231_1525	K337|K337_0463	KF24|KF24_1193	Li1|Li1_2055	N42|N42_0256	ML8|ML8_0115	UC317|UC317_0239	KF67|KF67_0225	LMG9446|LMG9446_0851	KF146|KF146_0414	KF134|KF134_1034	KF196|KF196_0237	DRA4|DRA4_1479	IL1403|IL1403_0355	CV56|CV56_0351	KLDS|KLDS_0394	LMG14418|LMG14418_0985	P7266|P7266_0473	43	FALSE
OG_1297	Alkyl hydroperoxide reductase protein C (EC1.6.4.-)	A76|A76_0397	UC509_9|UC5099_0363	FG2|FG2_0441	HP|HP_1330	LMG6897|LMG6897_0751	B40|B40_1471	SK11|SK11_0377	AM2|AM2_0732	SK110|SK110_0913	KW10|KW10_1470	KW2|KW2_0331	MG1363|MG1363_0370	NCDO763|NCDO763_1010	N41|N41_1069	V4|V4_2004	LMG8520|LMG8520_2142	IO_1|IO1_0324	LMG8526|LMG8526_0038	KF147|KF147_0406	KF282|KF282_0564	E34|E34_1290	KF201|KF201_0272	M20|M20_0310	ATCC19435|ATCC19435_1057	KF7|KF7_0209	LMG9449|LMG9449_1069	K231|K231_1506	K337|K337_0481	KF24|KF24_1211	Li1|Li1_2074	N42|N42_0274	ML8|ML8_0097	UC317|UC317_0257	KF67|KF67_1571	LMG9446|LMG9446_0731	KF146|KF146_2113	KF134|KF134_0993	KF196|KF196_0255	DRA4|DRA4_1650	IL1403|IL1403_0374	CV56|CV56_0369	KLDS|KLDS_0412	LMG14418|LMG14418_0967		43	FALSE
OG_1298	Alkyl hydroperoxide reductase protein F (EC1.6.4.-)	A76|A76_0398	UC509_9|UC5099_0364	FG2|FG2_0440	HP|HP_1329	LMG6897|LMG6897_0752	B40|B40_1470	SK11|SK11_0378	AM2|AM2_0731	SK110|SK110_0912	KW10|KW10_1469	KW2|KW2_0332	MG1363|MG1363_0371	NCDO763|NCDO763_1009	N41|N41_1070	V4|V4_2005	LMG8520|LMG8520_2141	IO_1|IO1_0325	LMG8526|LMG8526_0037	KF147|KF147_0407	KF282|KF282_0565	E34|E34_1289	KF201|KF201_0273	M20|M20_0311	ATCC19435|ATCC19435_1058	KF7|KF7_0210	LMG9449|LMG9449_1068	K231|K231_1505	K337|K337_0482	KF24|KF24_1212	Li1|Li1_2075	N42|N42_0275	ML8|ML8_0096	UC317|UC317_0258	KF67|KF67_1572	LMG9446|LMG9446_0730	KF146|KF146_2114	KF134|KF134_0992	KF196|KF196_0256	DRA4|DRA4_1649	IL1403|IL1403_0375	CV56|CV56_0370	KLDS|KLDS_0413	LMG14418|LMG14418_0966		43	FALSE
OG_1299	Hypothetical similar to thiamin biosynthesislipoprotein ApbE	A76|A76_0431	UC509_9|UC5099_0396	FG2|FG2_0581	HP|HP_0976	LMG6897|LMG6897_0945	B40|B40_2044	SK11|SK11_0410	AM2|AM2_0700	SK110|SK110_0880	KW10|KW10_1438	KW2|KW2_0362	MG1363|MG1363_0403	NCDO763|NCDO763_0977	N41|N41_1101	V4|V4_2036	LMG8520|LMG8520_2108	IO_1|IO1_0356	LMG8526|LMG8526_0006	KF147|KF147_0438	KF282|KF282_0596	E34|E34_1258	KF201|KF201_0304	M20|M20_0342	ATCC19435|ATCC19435_1089	KF7|KF7_0241	LMG9449|LMG9449_1037	K231|K231_1474	K337|K337_0513	KF24|KF24_1243	Li1|Li1_2106	N42|N42_0307	ML8|ML8_0065	UC317|UC317_0289	KF67|KF67_1603	LMG9446|LMG9446_0699	KF146|KF146_2145	KF134|KF134_0961	KF196|KF196_0287	DRA4|DRA4_1617	IL1403|IL1403_0407	CV56|CV56_0402	KLDS|KLDS_0445	LMG14418|LMG14418_2059	P7266|P7266_0427	44	1
OG_13	3'-to-5' exoribonuclease RNase R	A76|A76_1588 A76|A76_1361	UC509_9|UC5099_1032 UC509_9|UC5099_1270	FG2|FG2_1150 FG2|FG2_1596	HP|HP_1503 HP|HP_2078	LMG6897|LMG6897_0915 LMG6897|LMG6897_1881	B40|B40_0211 B40|B40_2575	SK11|SK11_1015 SK11|SK11_1354	AM2|AM2_1376 AM2|AM2_1836	SK110|SK110_0135 SK110|SK110_0405	KW10|KW10_0017 KW10|KW10_0609	KW2|KW2_0918 KW2|KW2_1150	MG1363|MG1363_1359 MG1363|MG1363_1645	NCDO763|NCDO763_0433 NCDO763|NCDO763_0842	N41|N41_1187 N41|N41_1744	V4|V4_1083 V4|V4_1508	LMG8520|LMG8520_1374 LMG8520|LMG8520_0614	IO_1|IO1_0933 IO_1|IO1_1142	LMG8526|LMG8526_0948 LMG8526|LMG8526_1628	KF147|KF147_1005 KF147|KF147_1290	KF282|KF282_2185 KF282|KF282_1977	E34|E34_1865 E34|E34_2196	KF201|KF201_1624 KF201|KF201_1129	M20|M20_1857 M20|M20_2654	ATCC19435|ATCC19435_1416 ATCC19435|ATCC19435_2180	KF7|KF7_1504 KF7|KF7_1702	LMG9449|LMG9449_0777 LMG9449|LMG9449_2155	K231|K231_0568 K231|K231_2132	K337|K337_1451 K337|K337_1655	KF24|KF24_1505 KF24|KF24_0928	Li1|Li1_0492 Li1|Li1_0711	N42|N42_1027 N42|N42_1832	ML8|ML8_0680 ML8|ML8_1029	UC317|UC317_2056 UC317|UC317_2425	KF67|KF67_0590 KF67|KF67_1831	LMG9446|LMG9446_0203 LMG9446|LMG9446_0399	KF146|KF146_1307 KF146|KF146_0656	KF134|KF134_0291 KF134|KF134_1763	KF196|KF196_0477 KF196|KF196_0704	DRA4|DRA4_0418 DRA4|DRA4_0498	IL1403|IL1403_1017 IL1403|IL1403_1312	CV56|CV56_0975 CV56|CV56_1248	KLDS|KLDS_1047 KLDS|KLDS_1332	LMG14418|LMG14418_1621 LMG14418|LMG14418_2300	P7266|P7266_0166 P7266|P7266_1531	44	1
OG_130	Mannitol operon activator, BglG family	A76|A76_0022	UC509_9|UC5099_0021	FG2|FG2_0474	HP|HP_1266	LMG6897|LMG6897_0052	B40|B40_0541	SK11|SK11_0021	AM2|AM2_0306	SK110|SK110_1341	KW10|KW10_1024	KW2|KW2_0022	MG1363|MG1363_0022	NCDO763|NCDO763_1112	N41|N41_1110	V4|V4_0801	LMG8520|LMG8520_1495	IO_1|IO1_0023	LMG8526|LMG8526_1486	KF147|KF147_0026	KF282|KF282_1243	E34|E34_0358	KF201|KF201_1282	M20|M20_2560	ATCC19435|ATCC19435_0390	KF7|KF7_2033	LMG9449|LMG9449_1869	K231|K231_0098	K337|K337_0926	KF24|KF24_2207	Li1|Li1_1794	N42|N42_0494	ML8|ML8_2102	UC317|UC317_1270	KF67|KF67_0773	LMG9446|LMG9446_1154	KF146|KF146_0023	KF134|KF134_0100 KF134|KF134_1544	KF196|KF196_1925	DRA4|DRA4_1375	IL1403|IL1403_0027	CV56|CV56_0056	KLDS|KLDS_0025	LMG14418|LMG14418_2067	P7266|P7266_1846	44	1
OG_1300	LysR family transcriptional regulator YeiE	A76|A76_0435	UC509_9|UC5099_0401	FG2|FG2_2169	HP|HP_1600	LMG6897|LMG6897_1269	B40|B40_0187	SK11|SK11_0414	AM2|AM2_1499	SK110|SK110_2156	KW10|KW10_1436	KW2|KW2_0364	MG1363|MG1363_0405	NCDO763|NCDO763_0975	N41|N41_0898	V4|V4_2038	LMG8520|LMG8520_2106	IO_1|IO1_0358	LMG8526|LMG8526_0004	KF147|KF147_0440	KF282|KF282_0598	E34|E34_1256	KF201|KF201_0306	M20|M20_0344	ATCC19435|ATCC19435_1091	KF7|KF7_0243	LMG9449|LMG9449_1035	K231|K231_1472	K337|K337_0515	KF24|KF24_1245	Li1|Li1_2108	N42|N42_0309	ML8|ML8_0902	UC317|UC317_1233	KF67|KF67_1605	LMG9446|LMG9446_0697	KF146|KF146_2147	KF134|KF134_0959	KF196|KF196_0289	DRA4|DRA4_2044	IL1403|IL1403_0413	CV56|CV56_0404	KLDS|KLDS_0447	LMG14418|LMG14418_2057		43	FALSE
OG_1301	L-lactate dehydrogenase (EC 1.1.1.27)	A76|A76_0440	UC509_9|UC5099_0404	FG2|FG2_1162	HP|HP_1603	LMG6897|LMG6897_1266	B40|B40_1170	SK11|SK11_0417	AM2|AM2_1501	SK110|SK110_2153	KW10|KW10_1434	KW2|KW2_0366	MG1363|MG1363_0407	NCDO763|NCDO763_0973	N41|N41_0900	V4|V4_2040	LMG8520|LMG8520_2103	IO_1|IO1_0360	LMG8526|LMG8526_0002	KF147|KF147_0442	KF282|KF282_0600	E34|E34_1254	KF201|KF201_0308	M20|M20_0346	ATCC19435|ATCC19435_1093	KF7|KF7_0245	LMG9449|LMG9449_1033	K231|K231_1470	K337|K337_0517	KF24|KF24_1247	Li1|Li1_2110	N42|N42_0311	ML8|ML8_0900	UC317|UC317_1231	KF67|KF67_1607	LMG9446|LMG9446_0695	KF146|KF146_2149	KF134|KF134_0957	KF196|KF196_0291	DRA4|DRA4_2041	IL1403|IL1403_0415	CV56|CV56_0406	KLDS|KLDS_0449	LMG14418|LMG14418_2055		43	FALSE
OG_1302	FIG00755754: hypothetical protein	A76|A76_0598	UC509_9|UC5099_1881	FG2|FG2_1859	HP|HP_1837	LMG6897|LMG6897_2304	B40|B40_2480	SK11|SK11_2047	AM2|AM2_0119	SK110|SK110_0359	KW10|KW10_1852	KW2|KW2_1876	MG1363|MG1363_2090	NCDO763|NCDO763_2375	N41|N41_0818	V4|V4_1468	LMG8520|LMG8520_0094	IO_1|IO1_1905	LMG8526|LMG8526_0625	KF147|KF147_2075	KF282|KF282_0793	E34|E34_1486	KF201|KF201_0616	M20|M20_0354	ATCC19435|ATCC19435_0559	KF7|KF7_0143	LMG9449|LMG9449_0437	K231|K231_1041	K337|K337_0269	KF24|KF24_2528	Li1|Li1_2370	N42|N42_0447	ML8|ML8_1603	UC317|UC317_0520	KF67|KF67_2160	LMG9446|LMG9446_2475	KF146|KF146_1772	KF134|KF134_0587	KF196|KF196_1598	DRA4|DRA4_1909	IL1403|IL1403_1968	CV56|CV56_1865	KLDS|KLDS_2037	LMG14418|LMG14418_1215		43	FALSE
OG_1303	LSU ribosomal protein L20p	A76|A76_0582	UC509_9|UC5099_1895	FG2|FG2_1845	HP|HP_1080	LMG6897|LMG6897_2318	B40|B40_2466	SK11|SK11_2063	AM2|AM2_0260	SK110|SK110_2058	KW10|KW10_1837	KW2|KW2_1890	MG1363|MG1363_2107	NCDO763|NCDO763_2393	N41|N41_0802	V4|V4_1453	LMG8520|LMG8520_0908	IO_1|IO1_1922	LMG8526|LMG8526_0642	KF147|KF147_2092	KF282|KF282_2487	E34|E34_1469	KF201|KF201_0633	M20|M20_0371	ATCC19435|ATCC19435_2162	KF7|KF7_2212	LMG9449|LMG9449_1347	K231|K231_2224	K337|K337_0286	KF24|KF24_0064	Li1|Li1_1547	N42|N42_0928	ML8|ML8_1565	UC317|UC317_1450	KF67|KF67_2178	LMG9446|LMG9446_2373	KF146|KF146_1790	KF134|KF134_0605	KF196|KF196_1580	DRA4|DRA4_2073	IL1403|IL1403_1986	CV56|CV56_1883	KLDS|KLDS_2054	LMG14418|LMG14418_0706	P7266|P7266_0934	44	1
OG_1304	LSU ribosomal protein L35p	A76|A76_0581	UC509_9|UC5099_1896	FG2|FG2_1844	HP|HP_1079	LMG6897|LMG6897_2319	B40|B40_2465	SK11|SK11_2064	AM2|AM2_0261	SK110|SK110_2059	KW10|KW10_1836	KW2|KW2_1891	MG1363|MG1363_2108	NCDO763|NCDO763_2394	N41|N41_0801	V4|V4_1452	LMG8520|LMG8520_0909	IO_1|IO1_1923	LMG8526|LMG8526_0643	KF147|KF147_2093	KF282|KF282_2486	E34|E34_1468	KF201|KF201_0634	M20|M20_0372	ATCC19435|ATCC19435_2161	KF7|KF7_2213	LMG9449|LMG9449_1346	K231|K231_2223	K337|K337_0287	KF24|KF24_0063	Li1|Li1_1548	N42|N42_0927	ML8|ML8_1566	UC317|UC317_1451	KF67|KF67_2179	LMG9446|LMG9446_2374	KF146|KF146_1791	KF134|KF134_0606	KF196|KF196_1579	DRA4|DRA4_2074	IL1403|IL1403_1987	CV56|CV56_1884	KLDS|KLDS_2055	LMG14418|LMG14418_0705	P7266|P7266_0935	44	1
OG_1305	Translation initiation factor 3	A76|A76_0580	UC509_9|UC5099_1897	FG2|FG2_1843	HP|HP_1078	LMG6897|LMG6897_2320	B40|B40_2464	SK11|SK11_2065	AM2|AM2_0262	SK110|SK110_2060	KW10|KW10_1835	KW2|KW2_1892	MG1363|MG1363_2109	NCDO763|NCDO763_2395	N41|N41_0800	V4|V4_1451	LMG8520|LMG8520_0910	IO_1|IO1_1924	LMG8526|LMG8526_0644	KF147|KF147_2094	KF282|KF282_2485	E34|E34_1467	KF201|KF201_0635	M20|M20_0373	ATCC19435|ATCC19435_2160	KF7|KF7_2214	LMG9449|LMG9449_1345	K231|K231_2222	K337|K337_0288	KF24|KF24_0062	Li1|Li1_1549	N42|N42_0926	ML8|ML8_1567	UC317|UC317_1452	KF67|KF67_2180	LMG9446|LMG9446_2375	KF146|KF146_1792	KF134|KF134_0607	KF196|KF196_1578	DRA4|DRA4_2075	IL1403|IL1403_1988	CV56|CV56_1885	KLDS|KLDS_2056	LMG14418|LMG14418_0704	P7266|P7266_0936	44	1
OG_1306	hypothetical protein	A76|A76_0575	UC509_9|UC5099_1900	FG2|FG2_0205	HP|HP_2257	LMG6897|LMG6897_2354	B40|B40_1545	SK11|SK11_2068	AM2|AM2_0264	SK110|SK110_2310	KW10|KW10_1834	KW2|KW2_1893	MG1363|MG1363_2110	NCDO763|NCDO763_1662	N41|N41_0799	V4|V4_1450	LMG8520|LMG8520_0912	IO_1|IO1_1926	LMG8526|LMG8526_0646	KF147|KF147_2096	KF282|KF282_2483	E34|E34_1465	KF201|KF201_0637	M20|M20_0375		KF7|KF7_2216	LMG9449|LMG9449_1343	K231|K231_2220	K337|K337_0290	KF24|KF24_0060	Li1|Li1_1551	N42|N42_0924	ML8|ML8_1569	UC317|UC317_1454	KF67|KF67_2182	LMG9446|LMG9446_2377	KF146|KF146_1794	KF134|KF134_0609	KF196|KF196_1576	DRA4|DRA4_0567	IL1403|IL1403_1990	CV56|CV56_1887	KLDS|KLDS_2058	LMG14418|LMG14418_1111	P7266|P7266_0939	43	FALSE
OG_1307	Co-activator of prophage gene expression IbrB	A76|A76_1262	UC509_9|UC5099_1206	FG2|FG2_2225	HP|HP_1424	LMG6897|LMG6897_1305	B40|B40_0491	SK11|SK11_1256	AM2|AM2_1974	SK110|SK110_1228	KW10|KW10_1279	KW2|KW2_1071	MG1363|MG1363_1471	NCDO763|NCDO763_2494	N41|N41_1581	V4|V4_1827	LMG8520|LMG8520_0242	IO_1|IO1_1084	LMG8526|LMG8526_1579	KF147|KF147_1204	KF282|KF282_2038	E34|E34_0082	KF201|KF201_1473	M20|M20_0380	ATCC19435|ATCC19435_2243	KF7|KF7_1643	LMG9449|LMG9449_1734	K231|K231_0433	K337|K337_1513	KF24|KF24_0383	Li1|Li1_0627	N42|N42_1168	ML8|ML8_1848	UC317|UC317_2179	KF67|KF67_0455	LMG9446|LMG9446_0340	KF146|KF146_1448	KF134|KF134_0155	KF196|KF196_0613	DRA4|DRA4_1797	IL1403|IL1403_1226	CV56|CV56_1185	KLDS|KLDS_1196	LMG14418|LMG14418_2390		43	FALSE
OG_1308	Phage lysin, glycosyl hydrolase, family 25	A76|A76_1264	UC509_9|UC5099_1209	FG2|FG2_2227	HP|HP_1426	LMG6897|LMG6897_1307	B40|B40_0493	SK11|SK11_1258	AM2|AM2_1972	SK110|SK110_1226	KW10|KW10_1277	KW2|KW2_1073	MG1363|MG1363_1469	NCDO763|NCDO763_2496	N41|N41_1579	V4|V4_1825	LMG8520|LMG8520_0244	IO_1|IO1_1086	LMG8526|LMG8526_1581	KF147|KF147_1206	KF282|KF282_2036	E34|E34_0084	KF201|KF201_1471	M20|M20_0382	ATCC19435|ATCC19435_2241	KF7|KF7_1645	LMG9449|LMG9449_1732	K231|K231_0431	K337|K337_1511	KF24|KF24_0381	Li1|Li1_0629	N42|N42_1170	ML8|ML8_1846	UC317|UC317_2177	KF67|KF67_0453	LMG9446|LMG9446_0342	KF146|KF146_1450	KF134|KF134_0153	KF196|KF196_0615	DRA4|DRA4_1799	IL1403|IL1403_1228	CV56|CV56_1187	KLDS|KLDS_1198	LMG14418|LMG14418_2388	P7266|P7266_1487	44	1
OG_1309	GMP reductase (EC 1.7.1.7)	A76|A76_1269	UC509_9|UC5099_1214	FG2|FG2_2232	HP|HP_1431	LMG6897|LMG6897_1312	B40|B40_0498	SK11|SK11_1263	AM2|AM2_1967	SK110|SK110_1221	KW10|KW10_1272	KW2|KW2_1078	MG1363|MG1363_1464	NCDO763|NCDO763_2501	N41|N41_1574	V4|V4_1820	LMG8520|LMG8520_0249	IO_1|IO1_1091	LMG8526|LMG8526_1586	KF147|KF147_1211	KF282|KF282_2031	E34|E34_0089	KF201|KF201_1466	M20|M20_0387	ATCC19435|ATCC19435_2236	KF7|KF7_1650	LMG9449|LMG9449_1727	K231|K231_0426	K337|K337_1506	KF24|KF24_0376	Li1|Li1_0634	N42|N42_1175	ML8|ML8_1841	UC317|UC317_2172	KF67|KF67_0448	LMG9446|LMG9446_0347	KF146|KF146_1455	KF134|KF134_0148	KF196|KF196_0620	DRA4|DRA4_1804	IL1403|IL1403_1234	CV56|CV56_1192	KLDS|KLDS_1203	LMG14418|LMG14418_2383	P7266|P7266_1492	44	1
OG_131	PTS system, cellobiose-specific IIC component(EC 2.7.1.69)	A76|A76_0491	UC509_9|UC5099_0461	FG2|FG2_2017	HP|HP_2412	LMG6897|LMG6897_0841	B40|B40_0860	SK11|SK11_0468	AM2|AM2_1542	SK110|SK110_1804	KW10|KW10_1387	KW2|KW2_0412	MG1363|MG1363_0455	NCDO763|NCDO763_0925	N41|N41_0948	V4|V4_2086	LMG8520|LMG8520_1650	IO_1|IO1_0272 IO_1|IO1_0403	LMG8526|LMG8526_0086 LMG8526|LMG8526_2231	KF147|KF147_0484	KF282|KF282_0641	E34|E34_1213	KF201|KF201_0350	M20|M20_1954	ATCC19435|ATCC19435_1134	KF7|KF7_0286	LMG9449|LMG9449_0974	K231|K231_1429	K337|K337_0558	KF24|KF24_1747	Li1|Li1_2151	N42|N42_0352 N42|N42_0353	ML8|ML8_1256	UC317|UC317_1777	KF67|KF67_1648	LMG9446|LMG9446_0654	KF146|KF146_2189	KF134|KF134_0916	KF196|KF196_0331	DRA4|DRA4_1512	IL1403|IL1403_0457	CV56|CV56_0448	KLDS|KLDS_0506	LMG14418|LMG14418_0618	P7266|P7266_0387	44	1
OG_1310	2-amino-4-hydroxy-6-hydroxymethyldihydropteridine pyrophosphokinase (EC2.7.6.3) / GTP cyclohydrolase I (EC 3.5.4.16) type 1	A76|A76_1285	UC509_9|UC5099_1228	FG2|FG2_0880	HP|HP_2437	LMG6897|LMG6897_2388	B40|B40_1106	SK11|SK11_1282	AM2|AM2_1152	SK110|SK110_2263	KW10|KW10_1262	KW2|KW2_1091	MG1363|MG1363_1393	NCDO763|NCDO763_0097	N41|N41_1564	V4|V4_1810	LMG8520|LMG8520_0259	IO_1|IO1_1101	LMG8526|LMG8526_1596	KF147|KF147_1221	KF282|KF282_2021	E34|E34_0099	KF201|KF201_1456	M20|M20_0397	ATCC19435|ATCC19435_2225	KF7|KF7_1660	LMG9449|LMG9449_1717	K231|K231_0416	K337|K337_1496	KF24|KF24_0366	Li1|Li1_0644	N42|N42_1185	ML8|ML8_1831	UC317|UC317_2162	KF67|KF67_0437	LMG9446|LMG9446_0358	KF146|KF146_1465	KF134|KF134_0138	KF196|KF196_0630	DRA4|DRA4_1823	IL1403|IL1403_1244	CV56|CV56_1202	KLDS|KLDS_1213	LMG14418|LMG14418_2373	P7266|P7266_1501	44	1
OG_1311	Dihydrofolate synthase (EC 6.3.2.12) /Folylpolyglutamate synthase (EC 6.3.2.17)	A76|A76_1288	UC509_9|UC5099_1231	FG2|FG2_0883	HP|HP_2440	LMG6897|LMG6897_2391	B40|B40_1109	SK11|SK11_1285	AM2|AM2_1155	SK110|SK110_2266	KW10|KW10_1259	KW2|KW2_1094	MG1363|MG1363_1390	NCDO763|NCDO763_0100	N41|N41_1561	V4|V4_1807	LMG8520|LMG8520_0262	IO_1|IO1_1104	LMG8526|LMG8526_1599	KF147|KF147_1224	KF282|KF282_2018	E34|E34_0102	KF201|KF201_1453	M20|M20_0400	ATCC19435|ATCC19435_2222	KF7|KF7_1663	LMG9449|LMG9449_1714	K231|K231_0413	K337|K337_1493	KF24|KF24_0363	Li1|Li1_0647	N42|N42_1188	ML8|ML8_1828	UC317|UC317_2159	KF67|KF67_0434	LMG9446|LMG9446_0361	KF146|KF146_1468	KF134|KF134_0135	KF196|KF196_0633	DRA4|DRA4_1826	IL1403|IL1403_1247	CV56|CV56_1205	KLDS|KLDS_1216	LMG14418|LMG14418_2370	P7266|P7266_1504	44	1
OG_1312	Spermidine Putrescine ABC transporter permeasecomponent potC (TC_3.A.1.11.1)	A76|A76_1296	UC509_9|UC5099_1240	FG2|FG2_0892	HP|HP_2449	LMG6897|LMG6897_2400	B40|B40_1117	SK11|SK11_1293	AM2|AM2_1164	SK110|SK110_2274	KW10|KW10_1251	KW2|KW2_1102	MG1363|MG1363_1382	NCDO763|NCDO763_0108	N41|N41_1553	V4|V4_1799	LMG8520|LMG8520_0271	IO_1|IO1_1113	LMG8526|LMG8526_1608	KF147|KF147_1233	KF282|KF282_2009	E34|E34_0111	KF201|KF201_1444	M20|M20_0409	ATCC19435|ATCC19435_2212	KF7|KF7_1672	LMG9449|LMG9449_1705	K231|K231_0404	K337|K337_1484	KF24|KF24_0354	Li1|Li1_0656	N42|N42_1197	ML8|ML8_1819	UC317|UC317_2150	KF67|KF67_0425	LMG9446|LMG9446_0370	KF146|KF146_1477	KF134|KF134_0126	KF196|KF196_0642	DRA4|DRA4_1834	IL1403|IL1403_1256	CV56|CV56_1214	KLDS|KLDS_1225	LMG14418|LMG14418_1255	P7266|P7266_1516	44	1
OG_1313	ABC transporter, periplasmic spermidineputrescine-binding protein PotD (TC 3.A.1.11.1)	A76|A76_1297	UC509_9|UC5099_1241	FG2|FG2_0893	HP|HP_2450	LMG6897|LMG6897_2401	B40|B40_1118	SK11|SK11_1294	AM2|AM2_1165	SK110|SK110_2275	KW10|KW10_1250	KW2|KW2_1103	MG1363|MG1363_1381	NCDO763|NCDO763_0109	N41|N41_1552	V4|V4_1798	LMG8520|LMG8520_0272	IO_1|IO1_1114	LMG8526|LMG8526_1609	KF147|KF147_1234	KF282|KF282_2008	E34|E34_0112	KF201|KF201_1443	M20|M20_0410	ATCC19435|ATCC19435_2211	KF7|KF7_1673	LMG9449|LMG9449_1704	K231|K231_0403	K337|K337_1483	KF24|KF24_0353	Li1|Li1_0657	N42|N42_1198	ML8|ML8_1818	UC317|UC317_2149	KF67|KF67_0424	LMG9446|LMG9446_0371	KF146|KF146_1478	KF134|KF134_0125	KF196|KF196_0643	DRA4|DRA4_1835	IL1403|IL1403_1257	CV56|CV56_1215	KLDS|KLDS_1226	LMG14418|LMG14418_1256	P7266|P7266_1517	44	1
OG_1314	Oxidoreductase	A76|A76_2623	UC509_9|UC5099_2341	FG2|FG2_0939	HP|HP_0493	LMG6897|LMG6897_1863	B40|B40_1551	SK11|SK11_2582	AM2|AM2_1203	SK110|SK110_1421	KW10|KW10_0883	KW2|KW2_2305	MG1363|MG1363_2625	NCDO763|NCDO763_1688	N41|N41_2570	V4|V4_2300	LMG8520|LMG8520_2219	IO_1|IO1_2318	LMG8526|LMG8526_2181	KF147|KF147_2578	KF282|KF282_1336	E34|E34_2276	KF201|KF201_2079	M20|M20_0455	ATCC19435|ATCC19435_1675	KF7|KF7_0999	LMG9449|LMG9449_0859	K231|K231_1064	K337|K337_0971	KF24|KF24_1284	Li1|Li1_2276	N42|N42_2520	ML8|ML8_0312	UC317|UC317_0569	KF67|KF67_1360	LMG9446|LMG9446_0542	KF146|KF146_0988	KF134|KF134_2226	KF196|KF196_1017	DRA4|DRA4_1457	IL1403|IL1403_2432	CV56|CV56_2459	KLDS|KLDS_2629	LMG14418|LMG14418_0741		43	FALSE
OG_1315	Transcriptional regulator, TetR family	A76|A76_2622	UC509_9|UC5099_2340	FG2|FG2_0938	HP|HP_0492	LMG6897|LMG6897_1862	B40|B40_1550	SK11|SK11_2581	AM2|AM2_1202	SK110|SK110_1420	KW10|KW10_0884	KW2|KW2_2304	MG1363|MG1363_2624	NCDO763|NCDO763_1689	N41|N41_2571	V4|V4_2299	LMG8520|LMG8520_2220	IO_1|IO1_2317	LMG8526|LMG8526_2180	KF147|KF147_2577	KF282|KF282_1337	E34|E34_2277	KF201|KF201_2080	M20|M20_0456	ATCC19435|ATCC19435_1674	KF7|KF7_1000	LMG9449|LMG9449_0860	K231|K231_1065	K337|K337_0972	KF24|KF24_1283	Li1|Li1_2277	N42|N42_2519	ML8|ML8_0311	UC317|UC317_0568	KF67|KF67_1361	LMG9446|LMG9446_0543	KF146|KF146_0989	KF134|KF134_2227	KF196|KF196_1018	DRA4|DRA4_1456	IL1403|IL1403_2431	CV56|CV56_2458	KLDS|KLDS_2628	LMG14418|LMG14418_0742		43	FALSE
OG_1316	Alkylphosphonate utilization operon proteinPhnA	A76|A76_2617	UC509_9|UC5099_2336	FG2|FG2_0934	HP|HP_0488	LMG6897|LMG6897_1858	B40|B40_0378	SK11|SK11_2577	AM2|AM2_1198	SK110|SK110_1416	KW10|KW10_0888	KW2|KW2_2300	MG1363|MG1363_2607	NCDO763|NCDO763_1198	N41|N41_2575	V4|V4_2295	LMG8520|LMG8520_2225	IO_1|IO1_2312	LMG8526|LMG8526_2175	KF147|KF147_2573	KF282|KF282_1341	E34|E34_2281	KF201|KF201_2084	M20|M20_0460	ATCC19435|ATCC19435_2353	KF7|KF7_1005	LMG9449|LMG9449_0864	K231|K231_1069	K337|K337_0976	KF24|KF24_1832	Li1|Li1_2281	N42|N42_2515	ML8|ML8_0307	UC317|UC317_0564	KF67|KF67_1365	LMG9446|LMG9446_0548	KF146|KF146_0993	KF134|KF134_2231	KF196|KF196_1022	DRA4|DRA4_1452	IL1403|IL1403_2427	CV56|CV56_2454	KLDS|KLDS_2602	LMG14418|LMG14418_0660		43	FALSE
OG_1317	FIG00755671: hypothetical protein	A76|A76_2605	UC509_9|UC5099_2323	FG2|FG2_0529	HP|HP_1390	LMG6897|LMG6897_1701	B40|B40_0366	SK11|SK11_2565	AM2|AM2_1096	SK110|SK110_1404	KW10|KW10_0899	KW2|KW2_2288	MG1363|MG1363_2599	NCDO763|NCDO763_1189	N41|N41_2584	V4|V4_2282		IO_1|IO1_2304	LMG8526|LMG8526_2166	KF147|KF147_2563	KF282|KF282_1349	E34|E34_2289	KF201|KF201_2092	M20|M20_0469	ATCC19435|ATCC19435_2362	KF7|KF7_1013	LMG9449|LMG9449_0872	K231|K231_1077	K337|K337_0984	KF24|KF24_1840	Li1|Li1_2289	N42|N42_2507	ML8|ML8_0358	UC317|UC317_0811	KF67|KF67_1373	LMG9446|LMG9446_0557	KF146|KF146_1001	KF134|KF134_2239	KF196|KF196_1030	DRA4|DRA4_1440	IL1403|IL1403_2419	CV56|CV56_2445	KLDS|KLDS_2594	LMG14418|LMG14418_1874	P7266|P7266_1728	43	FALSE
OG_1318	transcription regulator	A76|A76_2602	UC509_9|UC5099_2320	FG2|FG2_0526	HP|HP_1387	LMG6897|LMG6897_1698	B40|B40_0363	SK11|SK11_2562	AM2|AM2_1099	SK110|SK110_1401	KW10|KW10_0902	KW2|KW2_2285	MG1363|MG1363_2596	NCDO763|NCDO763_1186	N41|N41_2587	V4|V4_2279	LMG8520|LMG8520_2235	IO_1|IO1_2301	LMG8526|LMG8526_2163	KF147|KF147_2560	KF282|KF282_1352	E34|E34_2292	KF201|KF201_2095	M20|M20_0472	ATCC19435|ATCC19435_2365	KF7|KF7_1016	LMG9449|LMG9449_0875	K231|K231_1080	K337|K337_0987	KF24|KF24_1843	Li1|Li1_2292	N42|N42_2504	ML8|ML8_0355	UC317|UC317_0814	KF67|KF67_1376	LMG9446|LMG9446_0560	KF146|KF146_1004	KF134|KF134_2242	KF196|KF196_1033	DRA4|DRA4_1437	IL1403|IL1403_2416	CV56|CV56_2442	KLDS|KLDS_2591	LMG14418|LMG14418_1877	P7266|P7266_1725	44	1
OG_1319	glucosyltransferase-S	A76|A76_2593	UC509_9|UC5099_2311	FG2|FG2_0768	HP|HP_2132	LMG6897|LMG6897_0128	B40|B40_1305	SK11|SK11_2553	AM2|AM2_1108	SK110|SK110_1392	KW10|KW10_0911	KW2|KW2_2269	MG1363|MG1363_2586	NCDO763|NCDO763_1176	N41|N41_2597	V4|V4_1307	LMG8520|LMG8520_2244	IO_1|IO1_2292	LMG8526|LMG8526_0147	KF147|KF147_2551	KF282|KF282_1712	E34|E34_2229	KF201|KF201_1765	M20|M20_0481	ATCC19435|ATCC19435_0454	KF7|KF7_1025	LMG9449|LMG9449_0884	K231|K231_1089	K337|K337_2323	KF24|KF24_1852	Li1|Li1_2301	N42|N42_1363	ML8|ML8_0346	UC317|UC317_0823	KF67|KF67_1385	LMG9446|LMG9446_1509	KF146|KF146_1013	KF134|KF134_2260	KF196|KF196_1042	DRA4|DRA4_1428	IL1403|IL1403_2407	CV56|CV56_2391	KLDS|KLDS_2582	LMG14418|LMG14418_1455	P7266|P7266_1716	44	1
OG_132	Late competence protein ComGB, access of DNA toComEA	A76|A76_2465	UC509_9|UC5099_2211	FG2|FG2_0241	HP|HP_2325	LMG6897|LMG6897_0956	B40|B40_0791	SK11|SK11_2453	AM2|AM2_1909	SK110|SK110_1642	KW10|KW10_0529	KW2|KW2_2174	MG1363|MG1363_2488	NCDO763|NCDO763_0805	N41|N41_2351	V4|V4_2324	LMG8520|LMG8520_1091 LMG8520|LMG8520_1092	IO_1|IO1_2194	LMG8526|LMG8526_0435	KF147|KF147_2433	KF282|KF282_0119	E34|E34_1950	KF201|KF201_0871	M20|M20_0079	ATCC19435|ATCC19435_1753	KF7|KF7_2347	LMG9449|LMG9449_0372	K231|K231_2301	K337|K337_1380	KF24|KF24_2614	Li1|Li1_0380	N42|N42_1284	ML8|ML8_1901	UC317|UC317_2474 UC317|UC317_2283	KF67|KF67_2324	LMG9446|LMG9446_1458	KF146|KF146_0964	KF134|KF134_2081	KF196|KF196_1424	DRA4|DRA4_2165	IL1403|IL1403_2298	CV56|CV56_2274	KLDS|KLDS_2459	LMG14418|LMG14418_1284	P7266|P7266_1263 P7266|P7266_1262	44	1
OG_1320	FIG001553: Hydrolase, HAD subfamily IIIA	A76|A76_2591	UC509_9|UC5099_2309	FG2|FG2_0770	HP|HP_2134	LMG6897|LMG6897_0130	B40|B40_1307	SK11|SK11_2551	AM2|AM2_0482	SK110|SK110_1390	KW10|KW10_0913	KW2|KW2_2267	MG1363|MG1363_2583	NCDO763|NCDO763_1173	N41|N41_2600		LMG8520|LMG8520_2247	IO_1|IO1_2289	LMG8526|LMG8526_2413	KF147|KF147_2549	KF282|KF282_1714	E34|E34_2231	KF201|KF201_1763	M20|M20_0483	ATCC19435|ATCC19435_0456	KF7|KF7_1027	LMG9449|LMG9449_0886	K231|K231_1091	K337|K337_2326	KF24|KF24_1854	Li1|Li1_2303	N42|N42_1254	ML8|ML8_0344	UC317|UC317_0825	KF67|KF67_1387	LMG9446|LMG9446_1511	KF146|KF146_1015	KF134|KF134_2262	KF196|KF196_1044	DRA4|DRA4_1426	IL1403|IL1403_2403	CV56|CV56_2389	KLDS|KLDS_2578	LMG14418|LMG14418_1023	P7266|P7266_1714	43	FALSE
OG_1321	SSU ribosomal protein S9p (S16e)	A76|A76_2626	UC509_9|UC5099_2344	FG2|FG2_0982	HP|HP_1274	LMG6897|LMG6897_0327	B40|B40_0038	SK11|SK11_2595	AM2|AM2_1920	SK110|SK110_0239	KW10|KW10_2163	KW2|KW2_2309	MG1363|MG1363_2627	NCDO763|NCDO763_1492	N41|N41_2372	V4|V4_2180	LMG8520|LMG8520_2602	IO_1|IO1_2320	LMG8526|LMG8526_0165	KF147|KF147_2580	KF282|KF282_2297	E34|E34_2310	KF201|KF201_2117	M20|M20_0517	ATCC19435|ATCC19435_2351	KF7|KF7_1760	LMG9449|LMG9449_0490	K231|K231_0662	K337|K337_1017	KF24|KF24_1409	Li1|Li1_0758	N42|N42_2763	ML8|ML8_0008	UC317|UC317_1213	KF67|KF67_0108	LMG9446|LMG9446_0434	KF146|KF146_1960	KF134|KF134_0759	KF196|KF196_1822	DRA4|DRA4_2348	IL1403|IL1403_2435	CV56|CV56_2462	KLDS|KLDS_2642	LMG14418|LMG14418_0713	P7266|P7266_1004	44	1
OG_1322	LSU ribosomal protein L13p (L13Ae)	A76|A76_2627	UC509_9|UC5099_2345	FG2|FG2_0981	HP|HP_1273	LMG6897|LMG6897_0326	B40|B40_0039	SK11|SK11_2596	AM2|AM2_1921	SK110|SK110_0238	KW10|KW10_2162	KW2|KW2_2310	MG1363|MG1363_2628	NCDO763|NCDO763_1493	N41|N41_2373	V4|V4_2181	LMG8520|LMG8520_2603	IO_1|IO1_2321	LMG8526|LMG8526_0164	KF147|KF147_2581	KF282|KF282_2296	E34|E34_2309	KF201|KF201_2116	M20|M20_0518	ATCC19435|ATCC19435_2350	KF7|KF7_1761	LMG9449|LMG9449_0489	K231|K231_0661	K337|K337_1016	KF24|KF24_1408	Li1|Li1_0757	N42|N42_2762	ML8|ML8_0009	UC317|UC317_1214	KF67|KF67_0109	LMG9446|LMG9446_0435	KF146|KF146_1961	KF134|KF134_0758	KF196|KF196_1823	DRA4|DRA4_2347	IL1403|IL1403_2436	CV56|CV56_2463	KLDS|KLDS_2643	LMG14418|LMG14418_0714	P7266|P7266_1005	44	1
OG_1323	SSU ribosomal protein S12p (S23e)	A76|A76_2639	UC509_9|UC5099_2356	FG2|FG2_2639	HP|HP_0416	LMG6897|LMG6897_0461	B40|B40_0050	SK11|SK11_2609	AM2|AM2_1929	SK110|SK110_0226	KW10|KW10_1605	KW2|KW2_2321	MG1363|MG1363_2640	NCDO763|NCDO763_1505	N41|N41_2385	V4|V4_2192	LMG8520|LMG8520_1962	IO_1|IO1_2329	LMG8526|LMG8526_0156	KF147|KF147_2589	KF282|KF282_2288	E34|E34_2301	KF201|KF201_2108	M20|M20_0527	ATCC19435|ATCC19435_2342	KF7|KF7_1769	LMG9449|LMG9449_0481	K231|K231_0653	K337|K337_1008	KF24|KF24_1400	Li1|Li1_0749	N42|N42_2754	ML8|ML8_0017	UC317|UC317_1222	KF67|KF67_0117	LMG9446|LMG9446_0443	KF146|KF146_1969	KF134|KF134_0750	KF196|KF196_1831	DRA4|DRA4_2335	IL1403|IL1403_2444	CV56|CV56_2471	KLDS|KLDS_2651	LMG14418|LMG14418_0722	P7266|P7266_1016	44	1
OG_1324	Glucose uptake protein homolog	A76|A76_2643	UC509_9|UC5099_2360	FG2|FG2_2644	HP|HP_0421	LMG6897|LMG6897_0466	B40|B40_0055	SK11|SK11_2614	AM2|AM2_2065	SK110|SK110_0221	KW10|KW10_1601	KW2|KW2_2325	MG1363|MG1363_2645	NCDO763|NCDO763_1511	N41|N41_2390	V4|V4_2197	LMG8520|LMG8520_1959	IO_1|IO1_2331	LMG8526|LMG8526_0154	KF147|KF147_2591	KF282|KF282_2286	E34|E34_2299	KF201|KF201_2106	M20|M20_0529	ATCC19435|ATCC19435_2340	KF7|KF7_1771	LMG9449|LMG9449_0479	K231|K231_0651	K337|K337_1006	KF24|KF24_1398	Li1|Li1_0747	N42|N42_2126	ML8|ML8_0019	UC317|UC317_1224	KF67|KF67_0119	LMG9446|LMG9446_0445	KF146|KF146_1971	KF134|KF134_0748	KF196|KF196_1833	DRA4|DRA4_2331	IL1403|IL1403_2446	CV56|CV56_2473	KLDS|KLDS_2653	LMG14418|LMG14418_0724	P7266|P7266_1018	44	1
OG_1325	SAM-dependent methyltransferase, MraW methylasefamily (EC 2.1.1.-)	A76|A76_2644	UC509_9|UC5099_2361	FG2|FG2_2645	HP|HP_0422	LMG6897|LMG6897_0467	B40|B40_0056	SK11|SK11_2615	AM2|AM2_2066	SK110|SK110_0220	KW10|KW10_1600	KW2|KW2_2326	MG1363|MG1363_2646	NCDO763|NCDO763_1512	N41|N41_2391	V4|V4_2198	LMG8520|LMG8520_1958	IO_1|IO1_2332	LMG8526|LMG8526_0153	KF147|KF147_2592	KF282|KF282_2285	E34|E34_2298	KF201|KF201_2105	M20|M20_0530	ATCC19435|ATCC19435_2339	KF7|KF7_1772	LMG9449|LMG9449_0478	K231|K231_0650	K337|K337_1005	KF24|KF24_1397	Li1|Li1_0746	N42|N42_2127	ML8|ML8_0020	UC317|UC317_1225	KF67|KF67_0120	LMG9446|LMG9446_0446	KF146|KF146_1972	KF134|KF134_0747	KF196|KF196_1834	DRA4|DRA4_2330	IL1403|IL1403_2447	CV56|CV56_2474	KLDS|KLDS_2654	LMG14418|LMG14418_0725	P7266|P7266_1019	44	1
OG_1326	COG1242: Predicted Fe-S oxidoreductase	A76|A76_2645	UC509_9|UC5099_2362	FG2|FG2_2646	HP|HP_0423	LMG6897|LMG6897_0468	B40|B40_0057	SK11|SK11_2616	AM2|AM2_2067	SK110|SK110_0219	KW10|KW10_1599	KW2|KW2_2327	MG1363|MG1363_2647	NCDO763|NCDO763_1513	N41|N41_2392	V4|V4_2199	LMG8520|LMG8520_1957	IO_1|IO1_2333	LMG8526|LMG8526_0152	KF147|KF147_2593	KF282|KF282_2284	E34|E34_2297	KF201|KF201_2104	M20|M20_0531	ATCC19435|ATCC19435_2338	KF7|KF7_1773	LMG9449|LMG9449_0477	K231|K231_0649	K337|K337_1004	KF24|KF24_1396	Li1|Li1_0745	N42|N42_2128	ML8|ML8_0021	UC317|UC317_1226	KF67|KF67_0121	LMG9446|LMG9446_0447	KF146|KF146_1973	KF134|KF134_0746	KF196|KF196_1835	DRA4|DRA4_2329	IL1403|IL1403_2448	CV56|CV56_2475	KLDS|KLDS_2655	LMG14418|LMG14418_0726	P7266|P7266_1020	44	1
OG_1327	Ribosomal RNA large subunit methyltransferase A(EC 2.1.1.51)	A76|A76_1465	UC509_9|UC5099_1413	FG2|FG2_1388	HP|HP_1346	LMG6897|LMG6897_1571	B40|B40_2525	SK11|SK11_1471	AM2|AM2_1287	SK110|SK110_0795	KW10|KW10_2169	KW2|KW2_1304	MG1363|MG1363_1167	NCDO763|NCDO763_2444	N41|N41_0517	V4|V4_2220	LMG8520|LMG8520_0308	IO_1|IO1_1363	LMG8526|LMG8526_1172	KF147|KF147_1466	KF282|KF282_1687	E34|E34_0769	KF201|KF201_0130	M20|M20_0535	ATCC19435|ATCC19435_0334	KF7|KF7_0429	LMG9449|LMG9449_1406	K231|K231_0713	K337|K337_0647	KF24|KF24_2423	Li1|Li1_1155	N42|N42_0835	ML8|ML8_2053	UC317|UC317_0341	KF67|KF67_0813	LMG9446|LMG9446_0028	KF146|KF146_0508	KF134|KF134_1623	KF196|KF196_0880	DRA4|DRA4_0840	IL1403|IL1403_1444	CV56|CV56_1378	KLDS|KLDS_1491	LMG14418|LMG14418_1151	P7266|P7266_1422	44	1
OG_1328	Tellurite resistance protein	A76|A76_1473	UC509_9|UC5099_1421	FG2|FG2_1396	HP|HP_1354	LMG6897|LMG6897_1579	B40|B40_2533	SK11|SK11_1479	AM2|AM2_1296	SK110|SK110_0787	KW10|KW10_2177	KW2|KW2_1313	MG1363|MG1363_1159	NCDO763|NCDO763_2436	N41|N41_0509	V4|V4_2212	LMG8520|LMG8520_0300	IO_1|IO1_1371	LMG8526|LMG8526_1164	KF147|KF147_1474	KF282|KF282_1695	E34|E34_0777	KF201|KF201_0138	M20|M20_0543	ATCC19435|ATCC19435_0342	KF7|KF7_0437	LMG9449|LMG9449_1414	K231|K231_0705	K337|K337_0655	KF24|KF24_2431	Li1|Li1_1163	N42|N42_0843	ML8|ML8_2062	UC317|UC317_0350	KF67|KF67_0821	LMG9446|LMG9446_0036	KF146|KF146_0500	KF134|KF134_1615	KF196|KF196_0888	DRA4|DRA4_0832	IL1403|IL1403_1453	CV56|CV56_1387	KLDS|KLDS_1499	LMG14418|LMG14418_1159	P7266|P7266_1430	44	1
OG_1329	Glycerol-3-phosphate dehydrogenase [NAD(P)+](EC 1.1.1.94)	A76|A76_1475	UC509_9|UC5099_1423	FG2|FG2_1398	HP|HP_1356	LMG6897|LMG6897_1581	B40|B40_2535	SK11|SK11_1481	AM2|AM2_1298	SK110|SK110_0785	KW10|KW10_2179	KW2|KW2_1315	MG1363|MG1363_1157	NCDO763|NCDO763_2434	N41|N41_0507	V4|V4_2210	LMG8520|LMG8520_0298	IO_1|IO1_1373	LMG8526|LMG8526_1162	KF147|KF147_1476	KF282|KF282_1697	E34|E34_0779	KF201|KF201_0140	M20|M20_0545	ATCC19435|ATCC19435_0344	KF7|KF7_0439	LMG9449|LMG9449_1416	K231|K231_0703	K337|K337_0657	KF24|KF24_2433	Li1|Li1_1165	N42|N42_0845	ML8|ML8_2064	UC317|UC317_0352	KF67|KF67_0823	LMG9446|LMG9446_0038	KF146|KF146_0498	KF134|KF134_1613	KF196|KF196_0890	DRA4|DRA4_0830	IL1403|IL1403_1455	CV56|CV56_1389	KLDS|KLDS_1501	LMG14418|LMG14418_1161	P7266|P7266_1432	44	1
OG_133	Ribonucleotide reductase of class III(anaerobic), activating protein (EC 1.97.1.4)	A76|A76_2707	UC509_9|UC5099_0282	FG2|FG2_1174	HP|HP_1945	LMG6897|LMG6897_1463	B40|B40_0120	SK11|SK11_0276	AM2|AM2_2355	SK110|SK110_0925	KW10|KW10_1543	KW2|KW2_0257	MG1363|MG1363_0292	NCDO763|NCDO763_1087	N41|N41_1722 N41|N41_0984	V4|V4_1928	LMG8520|LMG8520_1146	IO_1|IO1_0245	LMG8526|LMG8526_0114	KF147|KF147_0279	KF282|KF282_0490	E34|E34_0133	KF201|KF201_0200	M20|M20_0222	ATCC19435|ATCC19435_0985	KF7|KF7_0737	LMG9449|LMG9449_1139	K231|K231_1585	K337|K337_0410	KF24|KF24_1139	Li1|Li1_2005	N42|N42_0206	ML8|ML8_0616	UC317|UC317_0190	KF67|KF67_0277	LMG9446|LMG9446_0910	KF146|KF146_0343	KF134|KF134_1305	KF196|KF196_2286	DRA4|DRA4_0074	IL1403|IL1403_0304	CV56|CV56_0302	KLDS|KLDS_0326	LMG14418|LMG14418_2076	P7266|P7266_0528	44	1
OG_1330	Cation-transporting ATPase, E1-E2 family	A76|A76_2033	UC509_9|UC5099_0602	FG2|FG2_1655	HP|HP_0363	LMG6897|LMG6897_0023	B40|B40_0196	SK11|SK11_0583	AM2|AM2_1755	SK110|SK110_1882	KW10|KW10_0846	KW2|KW2_0516	MG1363|MG1363_0564	NCDO763|NCDO763_2264	N41|N41_1634	V4|V4_1739	LMG8520|LMG8520_0816	IO_1|IO1_0488	LMG8526|LMG8526_0843	KF147|KF147_0573	KF282|KF282_1448	E34|E34_0816	KF201|KF201_1895	M20|M20_0573	ATCC19435|ATCC19435_0424	KF7|KF7_1816	LMG9449|LMG9449_2353	K231|K231_0160	K337|K337_1109	KF24|KF24_1376	Li1|Li1_0808	N42|N42_0024	ML8|ML8_2172	UC317|UC317_0297	KF67|KF67_2384	LMG9446|LMG9446_1927	KF146|KF146_1153	KF134|KF134_2200	KF196|KF196_2043	DRA4|DRA4_2301	IL1403|IL1403_0619	CV56|CV56_0536	KLDS|KLDS_0620	LMG14418|LMG14418_0693		43	FALSE
OG_1331	carotenoid biosynthetic protein CrtK	A76|A76_1360	UC509_9|UC5099_1271	FG2|FG2_1149	HP|HP_1502	LMG6897|LMG6897_0914	B40|B40_0210	SK11|SK11_1353	AM2|AM2_1751	SK110|SK110_0136	KW10|KW10_0016	KW2|KW2_1151	MG1363|MG1363_1358	NCDO763|NCDO763_0843	N41|N41_1186	V4|V4_1509	LMG8520|LMG8520_0811	IO_1|IO1_0492	LMG8526|LMG8526_0839	KF147|KF147_0577	KF282|KF282_1452	E34|E34_0820	KF201|KF201_1891	M20|M20_0577	ATCC19435|ATCC19435_0428	KF7|KF7_1820	LMG9449|LMG9449_2357	K231|K231_0164	K337|K337_1113	KF24|KF24_1372	Li1|Li1_0812	N42|N42_0028	ML8|ML8_2168	UC317|UC317_0293	KF67|KF67_2388	LMG9446|LMG9446_1923	KF146|KF146_1157	KF134|KF134_2196	KF196|KF196_2039	DRA4|DRA4_0499	IL1403|IL1403_0623	CV56|CV56_0540	KLDS|KLDS_0624	LMG14418|LMG14418_0697	P7266|P7266_0028	44	1
OG_1332	FIG146085: 3'-to-5' oligoribonuclease A,Bacillus type	A76|A76_1843	UC509_9|UC5099_0776	FG2|FG2_1723	HP|HP_2539	LMG6897|LMG6897_2510	B40|B40_0976	SK11|SK11_0763	AM2|AM2_1066	SK110|SK110_2370	KW10|KW10_0707	KW2|KW2_0657	MG1363|MG1363_1893	NCDO763|NCDO763_1360	N41|N41_2294	V4|V4_0458	LMG8520|LMG8520_1538	IO_1|IO1_0697	LMG8526|LMG8526_2043	KF147|KF147_0781	KF282|KF282_1562	E34|E34_0970	KF201|KF201_1242	M20|M20_0637	ATCC19435|ATCC19435_0754	KF7|KF7_0095	LMG9449|LMG9449_0259	K231|K231_1308	K337|K337_2183	KF24|KF24_2280	Li1|Li1_1524	N42|N42_1865	ML8|ML8_0656	UC317|UC317_1177	KF67|KF67_0186	LMG9446|LMG9446_2157	KF146|KF146_2482	KF134|KF134_1134	KF196|KF196_0974	DRA4|DRA4_0001	IL1403|IL1403_0794	CV56|CV56_0755	KLDS|KLDS_0771	LMG14418|LMG14418_1092	P7266|P7266_0695	44	1
OG_1333	Cytosolic protein containing multiple CBSdomains	A76|A76_1844	UC509_9|UC5099_0775	FG2|FG2_1724	HP|HP_2540	LMG6897|LMG6897_2511	B40|B40_0977	SK11|SK11_0762	AM2|AM2_1067	SK110|SK110_2371	KW10|KW10_0708	KW2|KW2_0656	MG1363|MG1363_1894	NCDO763|NCDO763_1359	N41|N41_2295	V4|V4_0457	LMG8520|LMG8520_1539	IO_1|IO1_0696	LMG8526|LMG8526_2042	KF147|KF147_0780	KF282|KF282_1561	E34|E34_0969	KF201|KF201_1241	M20|M20_0638	ATCC19435|ATCC19435_0753	KF7|KF7_0094	LMG9449|LMG9449_0260	K231|K231_1309	K337|K337_2182	KF24|KF24_2279	Li1|Li1_1523	N42|N42_1866	ML8|ML8_0657	UC317|UC317_1178	KF67|KF67_0185	LMG9446|LMG9446_2156	KF146|KF146_2481	KF134|KF134_1135	KF196|KF196_0975	DRA4|DRA4_0002	IL1403|IL1403_0793	CV56|CV56_0754	KLDS|KLDS_0770	LMG14418|LMG14418_1093	P7266|P7266_0696	44	1
OG_1334	FIG00755079: hypothetical protein	A76|A76_1873	UC509_9|UC5099_0745	FG2|FG2_2574	HP|HP_1476	LMG6897|LMG6897_2431	B40|B40_1945	SK11|SK11_0734	AM2|AM2_1395	SK110|SK110_2398	KW10|KW10_0728	KW2|KW2_0630	MG1363|MG1363_1920	NCDO763|NCDO763_0304	N41|N41_0693	V4|V4_0423	LMG8520|LMG8520_1558	IO_1|IO1_0678	LMG8526|LMG8526_2024	KF147|KF147_0757	KF282|KF282_1543	E34|E34_0952	KF201|KF201_1220	M20|M20_0655	ATCC19435|ATCC19435_0736	KF7|KF7_0069	LMG9449|LMG9449_0277	K231|K231_1326	K337|K337_2165	KF24|KF24_2262	Li1|Li1_1506	N42|N42_1890	ML8|ML8_2294	UC317|UC317_2517	KF67|KF67_0930	LMG9446|LMG9446_2138	KF146|KF146_2506	KF134|KF134_1153	KF196|KF196_2350	DRA4|DRA4_0028	IL1403|IL1403_0773	CV56|CV56_0725	KLDS|KLDS_0746	LMG14418|LMG14418_1387	P7266|P7266_0712	44	1
OG_1335	FIG00755336: hypothetical protein	A76|A76_2052	UC509_9|UC5099_0579	FG2|FG2_1635	HP|HP_0382	LMG6897|LMG6897_0043	B40|B40_0473	SK11|SK11_0564	AM2|AM2_1776	SK110|SK110_1901	KW10|KW10_0866	KW2|KW2_0497	MG1363|MG1363_0545	NCDO763|NCDO763_2245	N41|N41_1614	V4|V4_1758	LMG8520|LMG8520_0838	IO_1|IO1_0470	LMG8526|LMG8526_0861	KF147|KF147_0553	KF282|KF282_1427	E34|E34_0796	KF201|KF201_1912	M20|M20_0723	ATCC19435|ATCC19435_0404	KF7|KF7_1798	LMG9449|LMG9449_2333	K231|K231_2231	K337|K337_1089	KF24|KF24_1825	Li1|Li1_1542	N42|N42_0006	ML8|ML8_2192	UC317|UC317_0317	KF67|KF67_2654	LMG9446|LMG9446_2285	KF146|KF146_1135	KF134|KF134_2222	KF196|KF196_2061	DRA4|DRA4_2320	IL1403|IL1403_0598	CV56|CV56_0515	KLDS|KLDS_0599	LMG14418|LMG14418_2039		43	FALSE
OG_1336	probably ATPase with chaperone activity,ATP-binding domain, evidenced by COGnitor	A76|A76_1912	UC509_9|UC5099_0707	FG2|FG2_1053	HP|HP_0159	LMG6897|LMG6897_1556	B40|B40_2132	SK11|SK11_0695	AM2|AM2_2467	SK110|SK110_1260	KW10|KW10_0758	KW2|KW2_0597	MG1363|MG1363_0674	NCDO763|NCDO763_0884	N41|N41_2036	V4|V4_0175	LMG8520|LMG8520_0738	IO_1|IO1_0579	LMG8526|LMG8526_0748	KF147|KF147_0677	KF282|KF282_0154	E34|E34_0923	KF201|KF201_1795	M20|M20_0745	ATCC19435|ATCC19435_0707	KF7|KF7_1913	LMG9449|LMG9449_2451	K231|K231_1863	K337|K337_2367	KF24|KF24_1901	Li1|Li1_1436	N42|N42_1920	ML8|ML8_2324	UC317|UC317_2548	KF67|KF67_2366	LMG9446|LMG9446_1833	KF146|KF146_2383	KF134|KF134_2104	KF196|KF196_1949	DRA4|DRA4_1302	IL1403|IL1403_0741	CV56|CV56_0635	KLDS|KLDS_0716	LMG14418|LMG14418_0760		43	FALSE
OG_1337	Branched-chain amino acid transport systemcarrier protein	A76|A76_1914	UC509_9|UC5099_0706	FG2|FG2_1052	HP|HP_0158	LMG6897|LMG6897_1555	B40|B40_2131	SK11|SK11_0694	AM2|AM2_2468	SK110|SK110_1259	KW10|KW10_0759	KW2|KW2_0596	MG1363|MG1363_0673	NCDO763|NCDO763_0883	N41|N41_2037	V4|V4_0176	LMG8520|LMG8520_0171	IO_1|IO1_0578	LMG8526|LMG8526_0749	KF147|KF147_0676	KF282|KF282_0153	E34|E34_0922	KF201|KF201_1796	M20|M20_0746	ATCC19435|ATCC19435_0706	KF7|KF7_1912	LMG9449|LMG9449_2450	K231|K231_1862	K337|K337_2368	KF24|KF24_1902	Li1|Li1_1435	N42|N42_1921	ML8|ML8_2325	UC317|UC317_2549	KF67|KF67_2365	LMG9446|LMG9446_1834	KF146|KF146_2382	KF134|KF134_2105	KF196|KF196_1950	DRA4|DRA4_1301	IL1403|IL1403_0740	CV56|CV56_0634	KLDS|KLDS_0715	LMG14418|LMG14418_0761		43	FALSE
OG_1338	ABC transporter, permease protein (putative)	A76|A76_1922	UC509_9|UC5099_0696	FG2|FG2_2697	HP|HP_1678	LMG6897|LMG6897_0161	B40|B40_1126	SK11|SK11_0685	AM2|AM2_2476	SK110|SK110_0670	KW10|KW10_0764	KW2|KW2_0591	MG1363|MG1363_0664	NCDO763|NCDO763_0533	N41|N41_2043	V4|V4_0182	LMG8520|LMG8520_0164	IO_1|IO1_0572	LMG8526|LMG8526_0755	KF147|KF147_0674	KF282|KF282_0147	E34|E34_0916	KF201|KF201_1803	M20|M20_0753	ATCC19435|ATCC19435_0699	KF7|KF7_1906	LMG9449|LMG9449_2443	K231|K231_1856	K337|K337_2375	KF24|KF24_1908	Li1|Li1_1429	N42|N42_1927	ML8|ML8_2333	UC317|UC317_2330	KF67|KF67_2359	LMG9446|LMG9446_1840	KF146|KF146_2376	KF134|KF134_2112	KF196|KF196_1956	DRA4|DRA4_0747	IL1403|IL1403_0729	CV56|CV56_0626	KLDS|KLDS_0707	LMG14418|LMG14418_0553		43	FALSE
OG_1339	Citrate synthase (si) (EC 2.3.3.1)	A76|A76_1930	UC509_9|UC5099_0688	FG2|FG2_2707	HP|HP_1688	LMG6897|LMG6897_0171	B40|B40_1135	SK11|SK11_0677	AM2|AM2_2483	SK110|SK110_0678	KW10|KW10_0771	KW2|KW2_0584	MG1363|MG1363_0657	NCDO763|NCDO763_0540	N41|N41_2050	V4|V4_0189	LMG8520|LMG8520_0153	IO_1|IO1_0565	LMG8526|LMG8526_0762	KF147|KF147_0667	KF282|KF282_0140	E34|E34_0909	KF201|KF201_1810	M20|M20_0760	ATCC19435|ATCC19435_0692	KF7|KF7_1899	LMG9449|LMG9449_2436	K231|K231_1849	K337|K337_2382	KF24|KF24_1915	Li1|Li1_1422	N42|N42_1934	ML8|ML8_2341	UC317|UC317_2321	KF67|KF67_2352	LMG9446|LMG9446_1847	KF146|KF146_2369	KF134|KF134_2119	KF196|KF196_1963	DRA4|DRA4_0755	IL1403|IL1403_0722	CV56|CV56_0619	KLDS|KLDS_0700	LMG14418|LMG14418_0546		43	FALSE
OG_134	Aconitate hydratase (EC 4.2.1.3)	A76|A76_1929	UC509_9|UC5099_0690	FG2|FG2_2704 FG2|FG2_2705	HP|HP_1685 HP|HP_1686	LMG6897|LMG6897_0168 LMG6897|LMG6897_0169	B40|B40_1133	SK11|SK11_0679	AM2|AM2_2482	SK110|SK110_0676	KW10|KW10_0770	KW2|KW2_0585	MG1363|MG1363_0658	NCDO763|NCDO763_0539	N41|N41_2049	V4|V4_0188	LMG8520|LMG8520_0155 LMG8520|LMG8520_0154	IO_1|IO1_0566	LMG8526|LMG8526_0761	KF147|KF147_0668	KF282|KF282_0141	E34|E34_0910	KF201|KF201_1809	M20|M20_0759	ATCC19435|ATCC19435_0693	KF7|KF7_1900	LMG9449|LMG9449_2437	K231|K231_1850	K337|K337_2381	KF24|KF24_1914	Li1|Li1_1423	N42|N42_1933	ML8|ML8_2340	UC317|UC317_2322	KF67|KF67_2353	LMG9446|LMG9446_1846	KF146|KF146_2370	KF134|KF134_2118	KF196|KF196_1962	DRA4|DRA4_0753	IL1403|IL1403_0723	CV56|CV56_0620	KLDS|KLDS_0701	LMG14418|LMG14418_0547		43	FALSE
OG_1340	Long-chain-fatty-acid--CoA ligase (EC 6.2.1.3)	A76|A76_1940	UC509_9|UC5099_0680		HP|HP_2291	LMG6897|LMG6897_0426	B40|B40_1142	SK11|SK11_0670	AM2|AM2_2491	SK110|SK110_1512	KW10|KW10_0778	KW2|KW2_0577	MG1363|MG1363_0650	NCDO763|NCDO763_0548	N41|N41_2058	V4|V4_0197	LMG8520|LMG8520_0145	IO_1|IO1_0557	LMG8526|LMG8526_0770	KF147|KF147_0659	KF282|KF282_0132	E34|E34_0901	KF201|KF201_1818	M20|M20_0768	ATCC19435|ATCC19435_0684	KF7|KF7_1891	LMG9449|LMG9449_2428	K231|K231_1841	K337|K337_2390	KF24|KF24_1923	Li1|Li1_1414	N42|N42_1942	ML8|ML8_2349	UC317|UC317_2313	KF67|KF67_2344	LMG9446|LMG9446_1855	KF146|KF146_2361	KF134|KF134_2127	KF196|KF196_1971	DRA4|DRA4_2023	IL1403|IL1403_0714	CV56|CV56_0611	KLDS|KLDS_0692	LMG14418|LMG14418_0184	P7266|P7266_0085	43	FALSE
OG_1341	ABC-type antimicrobial peptide transportsystem, permease component	A76|A76_1942	UC509_9|UC5099_0678		HP|HP_2293	LMG6897|LMG6897_0424	B40|B40_1145	SK11|SK11_0668	AM2|AM2_2494	SK110|SK110_1510	KW10|KW10_0780	KW2|KW2_0575	MG1363|MG1363_0648	NCDO763|NCDO763_0550	N41|N41_2060	V4|V4_0199	LMG8520|LMG8520_0143	IO_1|IO1_0555	LMG8526|LMG8526_0772	KF147|KF147_0657	KF282|KF282_0130	E34|E34_0899	KF201|KF201_1820	M20|M20_0770	ATCC19435|ATCC19435_0682	KF7|KF7_1889	LMG9449|LMG9449_2426	K231|K231_1839	K337|K337_2392	KF24|KF24_1925	Li1|Li1_1412	N42|N42_1944	ML8|ML8_2352	UC317|UC317_2310	KF67|KF67_2342	LMG9446|LMG9446_1857	KF146|KF146_2359	KF134|KF134_2129	KF196|KF196_1973	DRA4|DRA4_2025	IL1403|IL1403_0711	CV56|CV56_0608	KLDS|KLDS_0690	LMG14418|LMG14418_0182	P7266|P7266_0083	43	FALSE
OG_1342	ABC transporter ATP-binding protein	A76|A76_1943	UC509_9|UC5099_0677		HP|HP_2294	LMG6897|LMG6897_0423	B40|B40_1146	SK11|SK11_0667	AM2|AM2_2495	SK110|SK110_1509	KW10|KW10_0781	KW2|KW2_0574	MG1363|MG1363_0647	NCDO763|NCDO763_0551	N41|N41_2061	V4|V4_0200	LMG8520|LMG8520_0142	IO_1|IO1_0554	LMG8526|LMG8526_0773	KF147|KF147_0656	KF282|KF282_0129	E34|E34_0898	KF201|KF201_1821	M20|M20_0771	ATCC19435|ATCC19435_0681	KF7|KF7_1888	LMG9449|LMG9449_2425	K231|K231_1838	K337|K337_2393	KF24|KF24_1926	Li1|Li1_1411	N42|N42_1945	ML8|ML8_2353	UC317|UC317_2309	KF67|KF67_2341	LMG9446|LMG9446_1858	KF146|KF146_2358	KF134|KF134_2130	KF196|KF196_1974	DRA4|DRA4_2026	IL1403|IL1403_0710	CV56|CV56_0607	KLDS|KLDS_0689	LMG14418|LMG14418_0181	P7266|P7266_0082	43	FALSE
OG_1343	ABC transporter ATP-binding protein	A76|A76_2629	UC509_9|UC5099_2347	FG2|FG2_0979	HP|HP_1271	LMG6897|LMG6897_0324	B40|B40_0041	SK11|SK11_2598	AM2|AM2_1923	SK110|SK110_0236	KW10|KW10_2160	KW2|KW2_2312	MG1363|MG1363_2630	NCDO763|NCDO763_1495	N41|N41_2375	V4|V4_2183	LMG8520|LMG8520_2606	IO_1|IO1_2323	LMG8526|LMG8526_0162	KF147|KF147_2583	KF282|KF282_2294	E34|E34_2307	KF201|KF201_2114		ATCC19435|ATCC19435_2348	KF7|KF7_1763	LMG9449|LMG9449_0487	K231|K231_0659	K337|K337_1014	KF24|KF24_1406	Li1|Li1_0755	N42|N42_2760	ML8|ML8_0011	UC317|UC317_1216	KF67|KF67_0111	LMG9446|LMG9446_0437	KF146|KF146_1963	KF134|KF134_0756	KF196|KF196_1825	DRA4|DRA4_2345	IL1403|IL1403_2438	CV56|CV56_2465	KLDS|KLDS_2645	LMG14418|LMG14418_0716	P7266|P7266_1010	43	FALSE
OG_1344	Single-stranded-DNA-specific exonuclease RecJ(EC 3.1.-.-)	A76|A76_1970	UC509_9|UC5099_0664	FG2|FG2_1015	HP|HP_0989	LMG6897|LMG6897_2088	B40|B40_1346	SK11|SK11_0640	AM2|AM2_1695	SK110|SK110_2145	KW10|KW10_0799	KW2|KW2_0565	MG1363|MG1363_0625	NCDO763|NCDO763_1592	N41|N41_1693	V4|V4_1689	LMG8520|LMG8520_0754	IO_1|IO1_0545	LMG8526|LMG8526_0782	KF147|KF147_0647	KF282|KF282_1506	E34|E34_0889	KF201|KF201_1830	M20|M20_0780	ATCC19435|ATCC19435_0672	KF7|KF7_1879	LMG9449|LMG9449_2416	K231|K231_1829	K337|K337_2402	KF24|KF24_1935	Li1|Li1_0080	N42|N42_0088	ML8|ML8_2113	UC317|UC317_2018	KF67|KF67_2441	LMG9446|LMG9446_1867	KF146|KF146_1213	KF134|KF134_2139	KF196|KF196_1983	DRA4|DRA4_2104	IL1403|IL1403_0679	CV56|CV56_0594	KLDS|KLDS_0680	LMG14418|LMG14418_0172	P7266|P7266_0071	44	1
OG_1345	Short chain dehydrogenase	A76|A76_1971	UC509_9|UC5099_0663	FG2|FG2_1016	HP|HP_0990	LMG6897|LMG6897_2089	B40|B40_1347	SK11|SK11_0639	AM2|AM2_1696	SK110|SK110_2144	KW10|KW10_0800	KW2|KW2_0564	MG1363|MG1363_0624	NCDO763|NCDO763_1591	N41|N41_1692	V4|V4_1690	LMG8520|LMG8520_0755	IO_1|IO1_0544	LMG8526|LMG8526_0783	KF147|KF147_0646	KF282|KF282_1505	E34|E34_0888	KF201|KF201_1831	M20|M20_0781	ATCC19435|ATCC19435_0671	KF7|KF7_1878	LMG9449|LMG9449_2415	K231|K231_1828	K337|K337_2403	KF24|KF24_1936	Li1|Li1_0079	N42|N42_0087	ML8|ML8_2114	UC317|UC317_2017	KF67|KF67_2440	LMG9446|LMG9446_1868	KF146|KF146_1212	KF134|KF134_2140	KF196|KF196_1984	DRA4|DRA4_2105	IL1403|IL1403_0678	CV56|CV56_0593	KLDS|KLDS_0679	LMG14418|LMG14418_0171	P7266|P7266_0069	44	1
OG_1346	Ribonuclease Z (EC 3.1.26.11)	A76|A76_1972	UC509_9|UC5099_0662	FG2|FG2_1017	HP|HP_0991	LMG6897|LMG6897_2090	B40|B40_1348	SK11|SK11_0638	AM2|AM2_1697	SK110|SK110_2143	KW10|KW10_0801	KW2|KW2_0563	MG1363|MG1363_0623	NCDO763|NCDO763_1590	N41|N41_1691	V4|V4_1691	LMG8520|LMG8520_0756	IO_1|IO1_0543	LMG8526|LMG8526_0784	KF147|KF147_0645	KF282|KF282_1504	E34|E34_0887	KF201|KF201_1832	M20|M20_0782	ATCC19435|ATCC19435_0670	KF7|KF7_1877	LMG9449|LMG9449_2414	K231|K231_1827	K337|K337_2404	KF24|KF24_1937	Li1|Li1_0078	N42|N42_0086	ML8|ML8_2115	UC317|UC317_2016	KF67|KF67_2439	LMG9446|LMG9446_1869	KF146|KF146_1211	KF134|KF134_2141	KF196|KF196_1985	DRA4|DRA4_2106	IL1403|IL1403_0677	CV56|CV56_0592	KLDS|KLDS_0678	LMG14418|LMG14418_0170	P7266|P7266_0068	44	1
OG_1347	FIG00756232: hypothetical protein	A76|A76_1980	UC509_9|UC5099_0655	FG2|FG2_1024	HP|HP_0998	LMG6897|LMG6897_2097	B40|B40_1355	SK11|SK11_0631	AM2|AM2_1703	SK110|SK110_2136	KW10|KW10_0807	KW2|KW2_0556	MG1363|MG1363_0608	NCDO763|NCDO763_1575	N41|N41_1675	V4|V4_1698	LMG8520|LMG8520_0763	IO_1|IO1_0537	LMG8526|LMG8526_0790	KF147|KF147_0639	KF282|KF282_1498	E34|E34_0881	KF201|KF201_1838	M20|M20_0788	ATCC19435|ATCC19435_0664	KF7|KF7_1871	LMG9449|LMG9449_2408	K231|K231_1821	K337|K337_1162	KF24|KF24_1943	Li1|Li1_0072	N42|N42_0080	ML8|ML8_2121	UC317|UC317_0451	KF67|KF67_2433	LMG9446|LMG9446_1875	KF146|KF146_1205	KF134|KF134_2147	KF196|KF196_1991	DRA4|DRA4_2113	IL1403|IL1403_0671	CV56|CV56_0586	KLDS|KLDS_0672	LMG14418|LMG14418_0164	P7266|P7266_0063	44	1
OG_1348	Transcriptional regulator, TetR family	A76|A76_1997	UC509_9|UC5099_0639	FG2|FG2_1038	HP|HP_1012	LMG6897|LMG6897_2111	B40|B40_1866	SK11|SK11_0617	AM2|AM2_1718	SK110|SK110_2121	KW10|KW10_0821	KW2|KW2_0539	MG1363|MG1363_0595	NCDO763|NCDO763_1562	N41|N41_1662	V4|V4_1711	LMG8520|LMG8520_0777	IO_1|IO1_0523	LMG8526|LMG8526_0805	KF147|KF147_0610	KF282|KF282_1483	E34|E34_0867	KF201|KF201_1852	M20|M20_0802	ATCC19435|ATCC19435_0650	KF7|KF7_1856	LMG9449|LMG9449_2394	K231|K231_1807	K337|K337_1147	KF24|KF24_1958	Li1|Li1_0058	N42|N42_0062	ML8|ML8_2136	UC317|UC317_0436	KF67|KF67_2419	LMG9446|LMG9446_1889	KF146|KF146_1191	KF134|KF134_2161	KF196|KF196_2005	DRA4|DRA4_2128	IL1403|IL1403_0656	CV56|CV56_0571	KLDS|KLDS_0657	LMG14418|LMG14418_0134		43	FALSE
OG_1349	Exonuclease SbcC	A76|A76_1456	UC509_9|UC5099_1403	FG2|FG2_2099	HP|HP_1463	LMG6897|LMG6897_2247	B40|B40_1748	SK11|SK11_1462	AM2|AM2_1279	SK110|SK110_0803	KW10|KW10_0568	KW2|KW2_1296	MG1363|MG1363_1177	NCDO763|NCDO763_1280	N41|N41_0450	V4|V4_0649	LMG8520|LMG8520_0316	IO_1|IO1_1355	LMG8526|LMG8526_0719	KF147|KF147_1458	KF282|KF282_0004	E34|E34_0761	KF201|KF201_0751	M20|M20_0854	ATCC19435|ATCC19435_0326	KF7|KF7_0421	LMG9449|LMG9449_1955	K231|K231_0722	K337|K337_1814	KF24|KF24_2129	Li1|Li1_1147	N42|N42_1567	ML8|ML8_0293	UC317|UC317_0333	KF67|KF67_1968	LMG9446|LMG9446_0020	KF146|KF146_0516	KF134|KF134_1631	KF196|KF196_0872	DRA4|DRA4_0849	IL1403|IL1403_1436	CV56|CV56_1370	KLDS|KLDS_1483	LMG14418|LMG14418_0285		43	FALSE
OG_135	phage infection protein	A76|A76_0822	UC509_9|UC5099_1711	FG2|FG2_0801	HP|HP_1955	LMG6897|LMG6897_1210	B40|B40_1840	SK11|SK11_1860	AM2|AM2_1020 AM2|AM2_1021	SK110|SK110_0588	KW10|KW10_0251	KW2|KW2_1633	MG1363|MG1363_0782	NCDO763|NCDO763_2043	N41|N41_1914	V4|V4_0687	LMG8520|LMG8520_0692	IO_1|IO1_1720	LMG8526|LMG8526_1074	KF147|KF147_1878	KF282|KF282_2545	E34|E34_1722	KF201|KF201_0430	M20|M20_0991	ATCC19435|ATCC19435_0060	KF7|KF7_0852	LMG9449|LMG9449_1303	K231|K231_0987	K337|K337_0019	KF24|KF24_0720	Li1|Li1_1327	N42|N42_1759	ML8|ML8_0587 ML8|ML8_0588	UC317|UC317_0924	KF67|KF67_1991	LMG9446|LMG9446_1700	KF146|KF146_1604	KF134|KF134_0417	KF196|KF196_1765	DRA4|DRA4_0656	IL1403|IL1403_1803	CV56|CV56_1677	KLDS|KLDS_1850	LMG14418|LMG14418_2146	P7266|P7266_1875	44	1
OG_1350	Para-aminobenzoate synthase, amidotransferasecomponent (EC 2.6.1.85)	A76|A76_1026	UC509_9|UC5099_2435	FG2|FG2_0941	HP|HP_1341	LMG6897|LMG6897_1525	B40|B40_1653	SK11|SK11_2672	AM2|AM2_1273	SK110|SK110_2513	KW10|KW10_0113	KW2|KW2_1280	MG1363|MG1363_1197	NCDO763|NCDO763_1953	N41|N41_1533	V4|V4_1644	LMG8520|LMG8520_2030	IO_1|IO1_1344	LMG8526|LMG8526_1758	KF147|KF147_1443	KF282|KF282_0015	E34|E34_0740	KF201|KF201_0757	M20|M20_0862	ATCC19435|ATCC19435_0320	KF7|KF7_0415	LMG9449|LMG9449_1962	K231|K231_0728	K337|K337_1820	KF24|KF24_0546	Li1|Li1_1141	N42|N42_1561	ML8|ML8_0287	UC317|UC317_0327	KF67|KF67_1962	LMG9446|LMG9446_0014	KF146|KF146_0522	KF134|KF134_1637	KF196|KF196_0866	DRA4|DRA4_0367	IL1403|IL1403_1430	CV56|CV56_1364	KLDS|KLDS_1475	LMG14418|LMG14418_1232		43	FALSE
OG_1351	Para-aminobenzoate synthase, aminase component(EC 2.6.1.85) / Aminodeoxychorismate lyase (EC 4.1.3.38)	A76|A76_1027	UC509_9|UC5099_2436	FG2|FG2_0940	HP|HP_1340	LMG6897|LMG6897_1524	B40|B40_1652	SK11|SK11_2673	AM2|AM2_1272	SK110|SK110_2512	KW10|KW10_0112	KW2|KW2_1279	MG1363|MG1363_1198	NCDO763|NCDO763_1954	N41|N41_1532	V4|V4_1643	LMG8520|LMG8520_2031	IO_1|IO1_1343	LMG8526|LMG8526_1757	KF147|KF147_1442	KF282|KF282_0016	E34|E34_0739	KF201|KF201_0758	M20|M20_0863	ATCC19435|ATCC19435_0319	KF7|KF7_0414	LMG9449|LMG9449_1963	K231|K231_0729	K337|K337_1821	KF24|KF24_0545	Li1|Li1_1140	N42|N42_1560	ML8|ML8_0286	UC317|UC317_0326	KF67|KF67_1961	LMG9446|LMG9446_0013	KF146|KF146_0523	KF134|KF134_1638	KF196|KF196_0865	DRA4|DRA4_0366	IL1403|IL1403_1429	CV56|CV56_1363	KLDS|KLDS_1474	LMG14418|LMG14418_1231		43	FALSE
OG_1352	16S rRNA (cytosine(967)-C(5))-methyltransferase(EC 2.1.1.176)	A76|A76_0524	UC509_9|UC5099_1949	FG2|FG2_2711	HP|HP_1875	LMG6897|LMG6897_0263	B40|B40_2001	SK11|SK11_2117	AM2|AM2_2172	SK110|SK110_2561	KW10|KW10_1784	KW2|KW2_1940	MG1363|MG1363_2156	NCDO763|NCDO763_1616	N41|N41_0752	V4|V4_1401	LMG8520|LMG8520_0959	IO_1|IO1_1971	LMG8526|LMG8526_0693	KF147|KF147_2140	KF282|KF282_2437	E34|E34_1420	KF201|KF201_0682	M20|M20_0903	ATCC19435|ATCC19435_2570	KF7|KF7_2261	LMG9449|LMG9449_2521	K231|K231_2175	K337|K337_0335	KF24|KF24_0015	Li1|Li1_1596	N42|N42_0879	ML8|ML8_1637	UC317|UC317_1115	KF67|KF67_2228	LMG9446|LMG9446_2422	KF146|KF146_1839	KF134|KF134_0654	KF196|KF196_1531	DRA4|DRA4_2455	IL1403|IL1403_2036	CV56|CV56_1934	KLDS|KLDS_2103	LMG14418|LMG14418_2349	P7266|P7266_0981	44	1
OG_1353	Protein serine/threonine phosphatase PrpC,regulation of stationary phase	A76|A76_0525	UC509_9|UC5099_1948	FG2|FG2_2712	HP|HP_1876	LMG6897|LMG6897_0264	B40|B40_2002	SK11|SK11_2116	AM2|AM2_2173	SK110|SK110_2562	KW10|KW10_1785	KW2|KW2_1939	MG1363|MG1363_2155	NCDO763|NCDO763_1617	N41|N41_0753	V4|V4_1402	LMG8520|LMG8520_0958	IO_1|IO1_1970	LMG8526|LMG8526_0692	KF147|KF147_2139	KF282|KF282_2438	E34|E34_1421	KF201|KF201_0681	M20|M20_0904	ATCC19435|ATCC19435_2569	KF7|KF7_2260	LMG9449|LMG9449_2522	K231|K231_2176	K337|K337_0334	KF24|KF24_0016	Li1|Li1_1595	N42|N42_0880	ML8|ML8_1638	UC317|UC317_1116	KF67|KF67_2227	LMG9446|LMG9446_2421	KF146|KF146_1838	KF134|KF134_0653	KF196|KF196_1532	DRA4|DRA4_2456	IL1403|IL1403_2035	CV56|CV56_1933	KLDS|KLDS_2102	LMG14418|LMG14418_2350	P7266|P7266_0980	44	1
OG_1354	Serine/threonine protein kinase PrkC, regulatorof stationary phase	A76|A76_0526	UC509_9|UC5099_1947	FG2|FG2_2713	HP|HP_1877	LMG6897|LMG6897_0265	B40|B40_2003	SK11|SK11_2115	AM2|AM2_2174	SK110|SK110_2563	KW10|KW10_1786	KW2|KW2_1938	MG1363|MG1363_2154	NCDO763|NCDO763_1618	N41|N41_0754	V4|V4_1403	LMG8520|LMG8520_0957	IO_1|IO1_1969	LMG8526|LMG8526_0691	KF147|KF147_2138	KF282|KF282_2439	E34|E34_1422	KF201|KF201_0680	M20|M20_0905	ATCC19435|ATCC19435_2568	KF7|KF7_2259	LMG9449|LMG9449_2523	K231|K231_2177	K337|K337_0333	KF24|KF24_0017	Li1|Li1_1594	N42|N42_0881	ML8|ML8_1639	UC317|UC317_1117	KF67|KF67_2226	LMG9446|LMG9446_2420	KF146|KF146_1837	KF134|KF134_0652	KF196|KF196_1533	DRA4|DRA4_2457	IL1403|IL1403_2034	CV56|CV56_1932	KLDS|KLDS_2101	LMG14418|LMG14418_2351	P7266|P7266_0979	44	1
OG_1355	SSU ribosomal protein S15p (S13e)	A76|A76_0527	UC509_9|UC5099_1946	FG2|FG2_2714	HP|HP_1878	LMG6897|LMG6897_0266	B40|B40_2004	SK11|SK11_2114	AM2|AM2_2175	SK110|SK110_2564	KW10|KW10_1787	KW2|KW2_1937	MG1363|MG1363_2153	NCDO763|NCDO763_1619	N41|N41_0755	V4|V4_1404	LMG8520|LMG8520_0956	IO_1|IO1_1968	LMG8526|LMG8526_0689	KF147|KF147_2137	KF282|KF282_2440	E34|E34_1423	KF201|KF201_0679	M20|M20_0906	ATCC19435|ATCC19435_2567	KF7|KF7_2258	LMG9449|LMG9449_2524	K231|K231_2178	K337|K337_0332	KF24|KF24_0018	Li1|Li1_1593	N42|N42_0882	ML8|ML8_1640	UC317|UC317_1118	KF67|KF67_2225	LMG9446|LMG9446_2419	KF146|KF146_1836	KF134|KF134_0651	KF196|KF196_1534	DRA4|DRA4_2458	IL1403|IL1403_2033	CV56|CV56_1931	KLDS|KLDS_2100	LMG14418|LMG14418_2352	P7266|P7266_0978	44	1
OG_1356	transcriptional regulator, MerR family	A76|A76_0536		FG2|FG2_2723	HP|HP_1887	LMG6897|LMG6897_0275	B40|B40_2013	SK11|SK11_2105	AM2|AM2_2183	SK110|SK110_2573	KW10|KW10_1798	KW2|KW2_1928	MG1363|MG1363_2144	NCDO763|NCDO763_1628	N41|N41_0764	V4|V4_1413	LMG8520|LMG8520_0948	IO_1|IO1_1960	LMG8526|LMG8526_0681	KF147|KF147_2129	KF282|KF282_2448	E34|E34_1431	KF201|KF201_0671	M20|M20_0914	ATCC19435|ATCC19435_2559	KF7|KF7_2250	LMG9449|LMG9449_2532	K231|K231_2186	K337|K337_0324	KF24|KF24_0026	Li1|Li1_1585	N42|N42_0890	ML8|ML8_1648	UC317|UC317_1126	KF67|KF67_2217	LMG9446|LMG9446_2411	KF146|KF146_1828	KF134|KF134_0643	KF196|KF196_1542	DRA4|DRA4_2467	IL1403|IL1403_2024	CV56|CV56_1923	KLDS|KLDS_2092	LMG14418|LMG14418_1142	P7266|P7266_0969	43	FALSE
OG_1357	Transcriptional regulators, LysR family	A76|A76_0539	UC509_9|UC5099_1934	FG2|FG2_2726	HP|HP_1890	LMG6897|LMG6897_0278	B40|B40_2016	SK11|SK11_2102	AM2|AM2_2184	SK110|SK110_2576	KW10|KW10_1799	KW2|KW2_1927	MG1363|MG1363_2143	NCDO763|NCDO763_1629	N41|N41_0765	V4|V4_1414	LMG8520|LMG8520_0947	IO_1|IO1_1959	LMG8526|LMG8526_0680	KF147|KF147_2128	KF282|KF282_2449	E34|E34_1432	KF201|KF201_0670	M20|M20_0915	ATCC19435|ATCC19435_2558	KF7|KF7_2249	LMG9449|LMG9449_2533	K231|K231_2187	K337|K337_0323	KF24|KF24_0027	Li1|Li1_1584	N42|N42_0891	ML8|ML8_1649	UC317|UC317_1128	KF67|KF67_2216	LMG9446|LMG9446_2410	KF146|KF146_1827	KF134|KF134_0642	KF196|KF196_1543	DRA4|DRA4_2470	IL1403|IL1403_2023	CV56|CV56_1922	KLDS|KLDS_2091		P7266|P7266_1367	43	FALSE
OG_1358	transmembrane efflux protein	A76|A76_0540	UC509_9|UC5099_1933	FG2|FG2_2727	HP|HP_1891	LMG6897|LMG6897_0279	B40|B40_2017	SK11|SK11_2101	AM2|AM2_0296	SK110|SK110_2577	KW10|KW10_1800	KW2|KW2_1926	MG1363|MG1363_2142	NCDO763|NCDO763_1630	N41|N41_0766	V4|V4_1416	LMG8520|LMG8520_0946	IO_1|IO1_1958	LMG8526|LMG8526_0679	KF147|KF147_2127	KF282|KF282_2450	E34|E34_1433	KF201|KF201_0669	M20|M20_0916	ATCC19435|ATCC19435_2557	KF7|KF7_2248	LMG9449|LMG9449_2534	K231|K231_2188	K337|K337_0322	KF24|KF24_0028	Li1|Li1_1583	N42|N42_0892	ML8|ML8_1650	UC317|UC317_1129	KF67|KF67_2215	LMG9446|LMG9446_2409	KF146|KF146_1826	KF134|KF134_0641	KF196|KF196_1544	DRA4|DRA4_2471	IL1403|IL1403_2022	CV56|CV56_1920	KLDS|KLDS_2090		P7266|P7266_1366	43	FALSE
OG_1359	Translation elongation factor Tu	A76|A76_0558	UC509_9|UC5099_1916	FG2|FG2_1491	HP|HP_0437	LMG6897|LMG6897_0996	B40|B40_1528	SK11|SK11_2084	AM2|AM2_0280	SK110|SK110_2293	KW10|KW10_1816	KW2|KW2_1910	MG1363|MG1363_2126	NCDO763|NCDO763_1646	N41|N41_0782	V4|V4_1433	LMG8520|LMG8520_0930	IO_1|IO1_1942	LMG8526|LMG8526_0662	KF147|KF147_2112	KF282|KF282_2466	E34|E34_1449	KF201|KF201_0653	M20|M20_0931	ATCC19435|ATCC19435_2541	KF7|KF7_2232	LMG9449|LMG9449_2550	K231|K231_2204	K337|K337_0306	KF24|KF24_0044	Li1|Li1_1567	N42|N42_0908	ML8|ML8_1666	UC317|UC317_1426	KF67|KF67_2198	LMG9446|LMG9446_2393	KF146|KF146_1810	KF134|KF134_0625	KF196|KF196_1560	DRA4|DRA4_0549	IL1403|IL1403_2006	CV56|CV56_1904	KLDS|KLDS_2074	LMG14418|LMG14418_1127	P7266|P7266_0954	44	1
OG_136	Lipopolysaccharide biosynthesis protein	A76|A76_0245 A76|A76_0253	UC509_9|UC5099_0206	FG2|FG2_0646	HP|HP_0557	LMG6897|LMG6897_0559	B40|B40_0561	SK11|SK11_0204	AM2|AM2_1617	SK110|SK110_1016	KW10|KW10_1674	KW2|KW2_0188	MG1363|MG1363_0220	NCDO763|NCDO763_0701	N41|N41_0269	V4|V4_2498	LMG8520|LMG8520_1811 LMG8520|LMG8520_1818	IO_1|IO1_0179	LMG8526|LMG8526_1312	KF147|KF147_0205	KF282|KF282_0426	E34|E34_0209 E34|E34_0202	KF201|KF201_1428	M20|M20_1420	ATCC19435|ATCC19435_0919	KF7|KF7_0671	LMG9449|LMG9449_1206	K231|K231_1650	K337|K337_0782	KF24|KF24_1075	Li1|Li1_1940	N42|N42_2168	ML8|ML8_0460	UC317|UC317_0035	KF67|KF67_0346	LMG9446|LMG9446_0980	KF146|KF146_0258	KF134|KF134_1372	KF196|KF196_2192	DRA4|DRA4_1029	IL1403|IL1403_0233	CV56|CV56_0227	KLDS|KLDS_0255	LMG14418|LMG14418_0506	P7266|P7266_0832	44	1
OG_1360	FIG01114333: hypothetical protein	A76|A76_0559	UC509_9|UC5099_1915	FG2|FG2_1492	HP|HP_0438	LMG6897|LMG6897_0997	B40|B40_1529	SK11|SK11_2083	AM2|AM2_0279	SK110|SK110_2294	KW10|KW10_1817	KW2|KW2_1909	MG1363|MG1363_2125	NCDO763|NCDO763_1647	N41|N41_0783	V4|V4_1434	LMG8520|LMG8520_0929	IO_1|IO1_1941	LMG8526|LMG8526_0661	KF147|KF147_2111	KF282|KF282_2467	E34|E34_1450	KF201|KF201_0652	M20|M20_0932	ATCC19435|ATCC19435_2540	KF7|KF7_2231		K231|K231_2205	K337|K337_0305	KF24|KF24_0045	Li1|Li1_1566	N42|N42_0909	ML8|ML8_1667	UC317|UC317_1427	KF67|KF67_2197	LMG9446|LMG9446_2392	KF146|KF146_1809	KF134|KF134_0624	KF196|KF196_1561	DRA4|DRA4_0550	IL1403|IL1403_2005	CV56|CV56_1903	KLDS|KLDS_2073	LMG14418|LMG14418_1126	P7266|P7266_0953	43	FALSE
OG_1361	FIG00755408: hypothetical protein	A76|A76_0567	UC509_9|UC5099_1907	FG2|FG2_0198	HP|HP_2250	LMG6897|LMG6897_2347	B40|B40_1538	SK11|SK11_2075	AM2|AM2_0271	SK110|SK110_2303	KW10|KW10_1825	KW2|KW2_1901	MG1363|MG1363_2117	NCDO763|NCDO763_1655	N41|N41_0791	V4|V4_1442	LMG8520|LMG8520_0921	IO_1|IO1_1933	LMG8526|LMG8526_0653	KF147|KF147_2103	KF282|KF282_2475	E34|E34_1458	KF201|KF201_0644	M20|M20_0940	ATCC19435|ATCC19435_2532	KF7|KF7_2223	LMG9449|LMG9449_1336	K231|K231_2213	K337|K337_0297	KF24|KF24_0053	Li1|Li1_1558	N42|N42_0917	ML8|ML8_1576	UC317|UC317_1461	KF67|KF67_2189	LMG9446|LMG9446_2384	KF146|KF146_1801	KF134|KF134_0616	KF196|KF196_1569	DRA4|DRA4_0559	IL1403|IL1403_1997	CV56|CV56_1895	KLDS|KLDS_2065	LMG14418|LMG14418_1118		43	FALSE
OG_1362	Two component system histidine kinase (EC2.7.3.-)	A76|A76_0818	UC509_9|UC5099_1715	FG2|FG2_1549	HP|HP_0463	LMG6897|LMG6897_1553	B40|B40_1844	SK11|SK11_1867	AM2|AM2_1025	SK110|SK110_2518	KW10|KW10_0247	KW2|KW2_1637	MG1363|MG1363_0778	NCDO763|NCDO763_2039	N41|N41_1910	V4|V4_0683	LMG8520|LMG8520_2348	IO_1|IO1_1724	LMG8526|LMG8526_1078	KF147|KF147_1882	KF282|KF282_2540	E34|E34_1718	KF201|KF201_0434	M20|M20_0995	ATCC19435|ATCC19435_0064	KF7|KF7_0856	LMG9449|LMG9449_1299	K231|K231_0983	K337|K337_0023	KF24|KF24_0724	Li1|Li1_1331	N42|N42_1755	ML8|ML8_0592	UC317|UC317_0920	KF67|KF67_1995	LMG9446|LMG9446_1704	KF146|KF146_1608	KF134|KF134_0421	KF196|KF196_1761	DRA4|DRA4_1537	IL1403|IL1403_1807	CV56|CV56_1682	KLDS|KLDS_1855	LMG14418|LMG14418_2151	P7266|P7266_1880	44	1
OG_1363	Two component system response regulator CiaR	A76|A76_0817	UC509_9|UC5099_1716	FG2|FG2_1550	HP|HP_0464	LMG6897|LMG6897_1554	B40|B40_1845	SK11|SK11_1868	AM2|AM2_1026	SK110|SK110_2519	KW10|KW10_0246	KW2|KW2_1638	MG1363|MG1363_0777	NCDO763|NCDO763_2038	N41|N41_1909	V4|V4_0682	LMG8520|LMG8520_2349	IO_1|IO1_1725	LMG8526|LMG8526_1079	KF147|KF147_1883	KF282|KF282_2539	E34|E34_1717	KF201|KF201_0435	M20|M20_0996	ATCC19435|ATCC19435_0065	KF7|KF7_0857	LMG9449|LMG9449_1298	K231|K231_0982	K337|K337_0024	KF24|KF24_0725	Li1|Li1_1332	N42|N42_1754	ML8|ML8_0593	UC317|UC317_0919	KF67|KF67_1996	LMG9446|LMG9446_1705	KF146|KF146_1609	KF134|KF134_0422	KF196|KF196_1760	DRA4|DRA4_1536	IL1403|IL1403_1808	CV56|CV56_1683	KLDS|KLDS_1856	LMG14418|LMG14418_2152	P7266|P7266_1881	44	1
OG_1364	Maltose operon transcriptional repressor MalR,LacI family	A76|A76_0816	UC509_9|UC5099_1717	FG2|FG2_1551	HP|HP_0494	LMG6897|LMG6897_0438	B40|B40_1846	SK11|SK11_1869	AM2|AM2_1027	SK110|SK110_2520	KW10|KW10_0245	KW2|KW2_1639	MG1363|MG1363_0776	NCDO763|NCDO763_2037	N41|N41_1908	V4|V4_0681	LMG8520|LMG8520_2350	IO_1|IO1_1726	LMG8526|LMG8526_1080	KF147|KF147_1884	KF282|KF282_2538	E34|E34_1716	KF201|KF201_0436	M20|M20_0997	ATCC19435|ATCC19435_0066	KF7|KF7_0858	LMG9449|LMG9449_1297	K231|K231_0981	K337|K337_0025	KF24|KF24_0726	Li1|Li1_1333	N42|N42_1753	ML8|ML8_0594	UC317|UC317_0918	KF67|KF67_1997	LMG9446|LMG9446_1706	KF146|KF146_1610	KF134|KF134_0423	KF196|KF196_1759	DRA4|DRA4_1535	IL1403|IL1403_1809	CV56|CV56_1684	KLDS|KLDS_1857	LMG14418|LMG14418_2153	P7266|P7266_1882	44	1
OG_1365	Maltose phosphorylase (EC 2.4.1.8) / Trehalosephosphorylase (EC 2.4.1.64)	A76|A76_0815	UC509_9|UC5099_1718	FG2|FG2_1552	HP|HP_0495	LMG6897|LMG6897_0439	B40|B40_1847	SK11|SK11_1870	AM2|AM2_1028	SK110|SK110_2521	KW10|KW10_0244	KW2|KW2_1640	MG1363|MG1363_0775	NCDO763|NCDO763_2036	N41|N41_1907	V4|V4_0680	LMG8520|LMG8520_2351	IO_1|IO1_1727	LMG8526|LMG8526_1081	KF147|KF147_1885	KF282|KF282_2537	E34|E34_1715	KF201|KF201_0437	M20|M20_0998	ATCC19435|ATCC19435_0067	KF7|KF7_0859	LMG9449|LMG9449_1296	K231|K231_0980	K337|K337_0026	KF24|KF24_0727	Li1|Li1_1334	N42|N42_1752	ML8|ML8_0595	UC317|UC317_0917	KF67|KF67_1998	LMG9446|LMG9446_1707	KF146|KF146_1611	KF134|KF134_0424	KF196|KF196_1758	DRA4|DRA4_1534	IL1403|IL1403_1810	CV56|CV56_1685	KLDS|KLDS_1858	LMG14418|LMG14418_2154	P7266|P7266_1883	44	1
OG_1366	PTS system, mannose-specific IID component (EC2.7.1.69)	A76|A76_0794	UC509_9|UC5099_1740	FG2|FG2_1891	HP|HP_2197	LMG6897|LMG6897_1078	B40|B40_0224	SK11|SK11_1889	AM2|AM2_0813	SK110|SK110_0665	KW10|KW10_0209	KW2|KW2_1675	MG1363|MG1363_0756	NCDO763|NCDO763_0559	N41|N41_1496	V4|V4_0030	LMG8520|LMG8520_1333	IO_1|IO1_1756	LMG8526|LMG8526_0482	KF147|KF147_1921	KF282|KF282_1003	E34|E34_1681	KF201|KF201_0474	M20|M20_1034	ATCC19435|ATCC19435_1702	KF7|KF7_0888	LMG9449|LMG9449_1520	K231|K231_0940	K337|K337_0060	KF24|KF24_0769	Li1|Li1_1376	N42|N42_1715	ML8|ML8_2425	UC317|UC317_0549	KF67|KF67_2031	LMG9446|LMG9446_1740	KF146|KF146_1645	KF134|KF134_0459	KF196|KF196_1724	DRA4|DRA4_2613	IL1403|IL1403_1844	CV56|CV56_1718	KLDS|KLDS_1892	LMG14418|LMG14418_1737	P7266|P7266_1897	44	1
OG_1367	Putative regulator of the mannose operon, ManO	A76|A76_0793	UC509_9|UC5099_1741	FG2|FG2_1892	HP|HP_2198	LMG6897|LMG6897_1079	B40|B40_0225	SK11|SK11_1890	AM2|AM2_0812	SK110|SK110_0666	KW10|KW10_0208	KW2|KW2_1676	MG1363|MG1363_0755	NCDO763|NCDO763_0560	N41|N41_0896	V4|V4_0031	LMG8520|LMG8520_1332	IO_1|IO1_1757	LMG8526|LMG8526_0483	KF147|KF147_1922	KF282|KF282_1004	E34|E34_1680	KF201|KF201_0475	M20|M20_1035	ATCC19435|ATCC19435_1701	KF7|KF7_0889	LMG9449|LMG9449_1521	K231|K231_0939	K337|K337_0061	KF24|KF24_0770	Li1|Li1_1377	N42|N42_1714	ML8|ML8_2424	UC317|UC317_0548	KF67|KF67_2032	LMG9446|LMG9446_1741	KF146|KF146_1646	KF134|KF134_0460	KF196|KF196_1723	DRA4|DRA4_2614	IL1403|IL1403_1845	CV56|CV56_1719	KLDS|KLDS_1893	LMG14418|LMG14418_1736	P7266|P7266_1898	44	1
OG_1368	Putative regulator of the mannose operon, ManO	A76|A76_0791	UC509_9|UC5099_1743	FG2|FG2_1894	HP|HP_2200	LMG6897|LMG6897_1081	B40|B40_0227	SK11|SK11_1892	AM2|AM2_0810	SK110|SK110_0668	KW10|KW10_0206	KW2|KW2_1678	MG1363|MG1363_0753	NCDO763|NCDO763_0562	N41|N41_0963	V4|V4_0033	LMG8520|LMG8520_1330	IO_1|IO1_1759	LMG8526|LMG8526_0485	KF147|KF147_1924	KF282|KF282_1006	E34|E34_1678	KF201|KF201_0477	M20|M20_1037	ATCC19435|ATCC19435_1699	KF7|KF7_0891	LMG9449|LMG9449_1523	K231|K231_0937	K337|K337_0064	KF24|KF24_0772	Li1|Li1_1379	N42|N42_1712	ML8|ML8_2422	UC317|UC317_0546	KF67|KF67_2034	LMG9446|LMG9446_1743	KF146|KF146_1648	KF134|KF134_0462	KF196|KF196_1721	DRA4|DRA4_2616	IL1403|IL1403_1847	CV56|CV56_1721	KLDS|KLDS_1895	LMG14418|LMG14418_1734	P7266|P7266_1900	44	1
OG_1369	Seryl-tRNA synthetase (EC 6.1.1.11)	A76|A76_0790	UC509_9|UC5099_1744	FG2|FG2_1895	HP|HP_2201	LMG6897|LMG6897_1082	B40|B40_0228	SK11|SK11_1893	AM2|AM2_0809	SK110|SK110_0669	KW10|KW10_0205	KW2|KW2_1679	MG1363|MG1363_0752	NCDO763|NCDO763_0563	N41|N41_0964	V4|V4_0034	LMG8520|LMG8520_1329	IO_1|IO1_1760	LMG8526|LMG8526_0486	KF147|KF147_1925	KF282|KF282_1007	E34|E34_1677	KF201|KF201_0478	M20|M20_1038	ATCC19435|ATCC19435_1698	KF7|KF7_0892	LMG9449|LMG9449_1524	K231|K231_0936	K337|K337_0065	KF24|KF24_0773	Li1|Li1_1380	N42|N42_1711	ML8|ML8_2421	UC317|UC317_0545	KF67|KF67_2035	LMG9446|LMG9446_1744	KF146|KF146_1649	KF134|KF134_0463	KF196|KF196_1720	DRA4|DRA4_2617	IL1403|IL1403_1848	CV56|CV56_1722	KLDS|KLDS_1896	LMG14418|LMG14418_1733	P7266|P7266_1901	44	1
OG_137	Nicotinamidase/isochorismatase family protein	A76|A76_1587	UC509_9|UC5099_1033	FG2|FG2_1597 FG2|FG2_1598	HP|HP_2079 HP|HP_2080	LMG6897|LMG6897_1882 LMG6897|LMG6897_1883	B40|B40_2576	SK11|SK11_1016	AM2|AM2_1377	SK110|SK110_0406	KW10|KW10_0608	KW2|KW2_0919	MG1363|MG1363_1644	NCDO763|NCDO763_0434	N41|N41_1743	V4|V4_1084	LMG8520|LMG8520_1375	IO_1|IO1_0934	LMG8526|LMG8526_0947	KF147|KF147_1006	KF282|KF282_2184	E34|E34_1866	KF201|KF201_1623	M20|M20_1856	ATCC19435|ATCC19435_1417	KF7|KF7_1505	LMG9449|LMG9449_0776	K231|K231_0567	K337|K337_1654	KF24|KF24_1506	Li1|Li1_0493	N42|N42_1028	ML8|ML8_1030	UC317|UC317_2055	KF67|KF67_0589	LMG9446|LMG9446_0204	KF146|KF146_1308	KF134|KF134_0290	KF196|KF196_0478	DRA4|DRA4_0419	IL1403|IL1403_1018	CV56|CV56_0977	KLDS|KLDS_1048	LMG14418|LMG14418_2299	P7266|P7266_0167	44	1
OG_1370	Competence protein CoiA	A76|A76_0766	UC509_9|UC5099_1766	FG2|FG2_0994	HP|HP_0695	LMG6897|LMG6897_0216	B40|B40_0690	SK11|SK11_1915	AM2|AM2_0792	SK110|SK110_1850	KW10|KW10_0185	KW2|KW2_1703	MG1363|MG1363_1982	NCDO763|NCDO763_1991 NCDO763|NCDO763_1878	N41|N41_0069	V4|V4_0058	LMG8520|LMG8520_1313	IO_1|IO1_1784	LMG8526|LMG8526_0503	KF147|KF147_1950	KF282|KF282_1024	E34|E34_1660	KF201|KF201_0495	M20|M20_1055	ATCC19435|ATCC19435_0608	KF7|KF7_0909	LMG9449|LMG9449_1541	K231|K231_0919	K337|K337_0137	KF24|KF24_0790	Li1|Li1_1397		ML8|ML8_2404	UC317|UC317_0797	KF67|KF67_2052	LMG9446|LMG9446_1761	KF146|KF146_1666	KF134|KF134_0480	KF196|KF196_1703	DRA4|DRA4_1840	IL1403|IL1403_1865	CV56|CV56_1739	KLDS|KLDS_1914	LMG14418|LMG14418_1716	P7266|P7266_1919	43	FALSE
OG_1371	lipoprotein, putative	A76|A76_0764	UC509_9|UC5099_1768	FG2|FG2_0739	HP|HP_0525	LMG6897|LMG6897_1530	B40|B40_0692	SK11|SK11_1917	AM2|AM2_0541	SK110|SK110_1848	KW10|KW10_0183	KW2|KW2_1705	MG1363|MG1363_1985	NCDO763|NCDO763_1875	N41|N41_0067	V4|V4_0060	LMG8520|LMG8520_1311	IO_1|IO1_1786	LMG8526|LMG8526_0505	KF147|KF147_1952	KF282|KF282_1026	E34|E34_1658	KF201|KF201_0497	M20|M20_1057	ATCC19435|ATCC19435_0523	KF7|KF7_0911	LMG9449|LMG9449_1543	K231|K231_0917	K337|K337_0140	KF24|KF24_0792	Li1|Li1_1399	N42|N42_2601	ML8|ML8_0996	UC317|UC317_0795	KF67|KF67_2054	LMG9446|LMG9446_1763	KF146|KF146_1668	KF134|KF134_0482	KF196|KF196_1701	DRA4|DRA4_1842	IL1403|IL1403_1867	CV56|CV56_1741	KLDS|KLDS_1916	LMG14418|LMG14418_1714		43	FALSE
OG_1372	FIG005935: membrane protein	A76|A76_0757	UC509_9|UC5099_1776	FG2|FG2_0321	HP|HP_1658	LMG6897|LMG6897_1664	B40|B40_0699	SK11|SK11_1925	AM2|AM2_0534	SK110|SK110_1840	KW10|KW10_0177	KW2|KW2_1711	MG1363|MG1363_1991	NCDO763|NCDO763_1869	N41|N41_0061	V4|V4_0066		IO_1|IO1_1792	LMG8526|LMG8526_0511	KF147|KF147_1959	KF282|KF282_1032	E34|E34_1652	KF201|KF201_0503	M20|M20_1064	ATCC19435|ATCC19435_0516	KF7|KF7_0918	LMG9449|LMG9449_1549	K231|K231_0910	K337|K337_0146	KF24|KF24_0798	Li1|Li1_1406	N42|N42_2594	ML8|ML8_0990	UC317|UC317_0788	KF67|KF67_2062	LMG9446|LMG9446_1770	KF146|KF146_1675	KF134|KF134_0490	KF196|KF196_1694	DRA4|DRA4_1850	IL1403|IL1403_1873	CV56|CV56_1748	KLDS|KLDS_1923	LMG14418|LMG14418_1707	P7266|P7266_1923	43	FALSE
OG_1373	Permease		UC509_9|UC5099_1788	FG2|FG2_2431	HP|HP_0967	LMG6897|LMG6897_2190	B40|B40_0719	SK11|SK11_1937	AM2|AM2_0018	SK110|SK110_1827	KW10|KW10_0165	KW2|KW2_1724	MG1363|MG1363_2003	NCDO763|NCDO763_1857	N41|N41_0049	V4|V4_0078	LMG8520|LMG8520_2513	IO_1|IO1_1805	LMG8526|LMG8526_0538	KF147|KF147_1973	KF282|KF282_1045	E34|E34_1639	KF201|KF201_0516	M20|M20_1077	ATCC19435|ATCC19435_2389	KF7|KF7_1187	LMG9449|LMG9449_1563	K231|K231_0897	K337|K337_0179	KF24|KF24_0811	Li1|Li1_0865	N42|N42_2581	ML8|ML8_2013	UC317|UC317_0755	KF67|KF67_2076	LMG9446|LMG9446_1783	KF146|KF146_1689	KF134|KF134_0504	KF196|KF196_1681	DRA4|DRA4_1863	IL1403|IL1403_1886	CV56|CV56_1779	KLDS|KLDS_1954	LMG14418|LMG14418_0061	P7266|P7266_1935	43	FALSE
OG_1374	FIG00755038: hypothetical protein	A76|A76_0739	UC509_9|UC5099_1791	FG2|FG2_2428	HP|HP_0964	LMG6897|LMG6897_2186	B40|B40_0716	SK11|SK11_1941	AM2|AM2_0022	SK110|SK110_1824	KW10|KW10_1905	KW2|KW2_1727	MG1363|MG1363_2007	NCDO763|NCDO763_1853	N41|N41_0046	V4|V4_0081	LMG8520|LMG8520_2517	IO_1|IO1_1809	LMG8526|LMG8526_0542	KF147|KF147_1977	KF282|KF282_1048	E34|E34_1635	KF201|KF201_0520	M20|M20_1081	ATCC19435|ATCC19435_2393	KF7|KF7_1183	LMG9449|LMG9449_1567	K231|K231_0893	K337|K337_0182	KF24|KF24_0815	Li1|Li1_0869	N42|N42_2577	ML8|ML8_2016	UC317|UC317_0752	KF67|KF67_2080	LMG9446|LMG9446_1787	KF146|KF146_1693	KF134|KF134_0508	KF196|KF196_1678	DRA4|DRA4_1866	IL1403|IL1403_1890	CV56|CV56_1783	KLDS|KLDS_1958	LMG14418|LMG14418_0058		43	FALSE
OG_1375	Glutamine ABC transporter, glutamine-bindingprotein/permease protein	A76|A76_0731	UC509_9|UC5099_1799	FG2|FG2_2420	HP|HP_0956	LMG6897|LMG6897_2178	B40|B40_0707	SK11|SK11_1949	AM2|AM2_0030	SK110|SK110_1816	KW10|KW10_1914	KW2|KW2_1735	MG1363|MG1363_2016	NCDO763|NCDO763_1845	N41|N41_0038	V4|V4_0089	LMG8520|LMG8520_2527	IO_1|IO1_1817	LMG8526|LMG8526_0551	KF147|KF147_1986	KF282|KF282_1056	E34|E34_1626	KF201|KF201_0528	M20|M20_1089	ATCC19435|ATCC19435_2402	KF7|KF7_1174	LMG9449|LMG9449_1576	K231|K231_0885	K337|K337_0191	KF24|KF24_0823	Li1|Li1_0877	N42|N42_2568	ML8|ML8_2024	UC317|UC317_0744	KF67|KF67_2090	LMG9446|LMG9446_1796	KF146|KF146_1702	KF134|KF134_0517	KF196|KF196_1669	DRA4|DRA4_1874	IL1403|IL1403_1898	CV56|CV56_1791	KLDS|KLDS_1966	LMG14418|LMG14418_0050	P7266|P7266_1948	44	1
OG_1376	Glutamate transport ATP-binding protein	A76|A76_0730	UC509_9|UC5099_1800	FG2|FG2_2419	HP|HP_0955	LMG6897|LMG6897_2177	B40|B40_0706	SK11|SK11_1950	AM2|AM2_0031	SK110|SK110_1815	KW10|KW10_1915	KW2|KW2_1736	MG1363|MG1363_2017	NCDO763|NCDO763_1844	N41|N41_0037	V4|V4_0090	LMG8520|LMG8520_2528	IO_1|IO1_1818	LMG8526|LMG8526_0552	KF147|KF147_1987	KF282|KF282_1057	E34|E34_1625	KF201|KF201_0529	M20|M20_1090	ATCC19435|ATCC19435_2403	KF7|KF7_1173	LMG9449|LMG9449_1577	K231|K231_0884	K337|K337_0192	KF24|KF24_0824	Li1|Li1_0878	N42|N42_2567	ML8|ML8_2025	UC317|UC317_0743	KF67|KF67_2091	LMG9446|LMG9446_1797	KF146|KF146_1703	KF134|KF134_0518	KF196|KF196_1668	DRA4|DRA4_1875	IL1403|IL1403_1899	CV56|CV56_1792	KLDS|KLDS_1967	LMG14418|LMG14418_0049	P7266|P7266_1949	44	1
OG_1377	FIG00756678: hypothetical protein	A76|A76_0704	UC509_9|UC5099_1825	FG2|FG2_0162	HP|HP_0345	LMG6897|LMG6897_1845	B40|B40_0765	SK11|SK11_1976	AM2|AM2_0048	SK110|SK110_0454	KW10|KW10_1932	KW2|KW2_1752	MG1363|MG1363_2033	NCDO763|NCDO763_1827	N41|N41_0020	V4|V4_0106	LMG8520|LMG8520_2547	IO_1|IO1_1835	LMG8526|LMG8526_0569	KF147|KF147_2004	KF282|KF282_1073	E34|E34_1608	KF201|KF201_0546	M20|M20_1107	ATCC19435|ATCC19435_2420	KF7|KF7_1156	LMG9449|LMG9449_1596	K231|K231_0867	K337|K337_0209	KF24|KF24_0841	Li1|Li1_0897	N42|N42_2550	ML8|ML8_2043	UC317|UC317_0725	KF67|KF67_2108	LMG9446|LMG9446_1814	KF146|KF146_1720	KF134|KF134_0535	KF196|KF196_1651	DRA4|DRA4_0788	IL1403|IL1403_1916	CV56|CV56_1811	KLDS|KLDS_1984	LMG14418|LMG14418_1576	P7266|P7266_1964	44	1
OG_1378	Phosphinothricin N-acetyltransferase	A76|A76_0703	UC509_9|UC5099_1826	FG2|FG2_0161	HP|HP_0344	LMG6897|LMG6897_1844	B40|B40_0355	SK11|SK11_1977	AM2|AM2_0049	SK110|SK110_0453	KW10|KW10_1933	KW2|KW2_1753	MG1363|MG1363_2034	NCDO763|NCDO763_1826	N41|N41_0019	V4|V4_0107	LMG8520|LMG8520_2548	IO_1|IO1_1836	LMG8526|LMG8526_0570	KF147|KF147_2006	KF282|KF282_1075	E34|E34_1607	KF201|KF201_0547	M20|M20_1108	ATCC19435|ATCC19435_2421	KF7|KF7_1155	LMG9449|LMG9449_1597	K231|K231_0866	K337|K337_0210	KF24|KF24_0842	Li1|Li1_0898	N42|N42_2549	ML8|ML8_2044	UC317|UC317_0724	KF67|KF67_2109	LMG9446|LMG9446_1815	KF146|KF146_1721	KF134|KF134_0536	KF196|KF196_1650	DRA4|DRA4_0787	IL1403|IL1403_1917	CV56|CV56_1812	KLDS|KLDS_1985	LMG14418|LMG14418_0565		43	FALSE
OG_1379	Thiaminase II (EC 3.5.99.2)	A76|A76_0701	UC509_9|UC5099_1828	FG2|FG2_0159	HP|HP_0342	LMG6897|LMG6897_1842	B40|B40_0353	SK11|SK11_1979	AM2|AM2_0051	SK110|SK110_0451	KW10|KW10_1935	KW2|KW2_1755	MG1363|MG1363_2036	NCDO763|NCDO763_1824	N41|N41_0017	V4|V4_0109	LMG8520|LMG8520_2552	IO_1|IO1_1838	LMG8526|LMG8526_0572	KF147|KF147_2008	KF282|KF282_1077	E34|E34_1605	KF201|KF201_0549	M20|M20_1110	ATCC19435|ATCC19435_2423	KF7|KF7_1153	LMG9449|LMG9449_1599	K231|K231_0864	K337|K337_0212	KF24|KF24_0844	Li1|Li1_0900	N42|N42_2547	ML8|ML8_2046	UC317|UC317_0722	KF67|KF67_2111	LMG9446|LMG9446_1817	KF146|KF146_1723	KF134|KF134_0538	KF196|KF196_1648	DRA4|DRA4_0785	IL1403|IL1403_1919	CV56|CV56_1814	KLDS|KLDS_1987	LMG14418|LMG14418_0567		43	FALSE
OG_138	PTS system, trehalose-specific IIA component(EC 2.7.1.69)	A76|A76_0503	UC509_9|UC5099_0474	FG2|FG2_1781 FG2|FG2_0311	HP|HP_1120 HP|HP_1190	LMG6897|LMG6897_0422	B40|B40_0251	SK11|SK11_0480	AM2|AM2_1553	SK110|SK110_1120	KW10|KW10_1376	KW2|KW2_0423	MG1363|MG1363_0468	NCDO763|NCDO763_0914	N41|N41_0959	V4|V4_2097	LMG8520|LMG8520_1666	IO_1|IO1_0414	LMG8526|LMG8526_2242	KF147|KF147_0495	KF282|KF282_0653	E34|E34_1202	KF201|KF201_0361	M20|M20_1965	ATCC19435|ATCC19435_1145	KF7|KF7_0297	LMG9449|LMG9449_0963	K231|K231_1418	K337|K337_0569	KF24|KF24_2106	Li1|Li1_2162	N42|N42_0364	ML8|ML8_1245	UC317|UC317_1788	KF67|KF67_1659	LMG9446|LMG9446_0643	KF146|KF146_2306	KF134|KF134_0905	KF196|KF196_0342	DRA4|DRA4_1166	IL1403|IL1403_0469	CV56|CV56_0459	KLDS|KLDS_0517	LMG14418|LMG14418_0607	P7266|P7266_0508	44	1
OG_1380	Undecaprenyl-phosphate N-acetylglucosaminyl1-phosphate transferase (EC 2.7.8.-)	A76|A76_0638	UC509_9|UC5099_1842	FG2|FG2_1689	HP|HP_1284	LMG6897|LMG6897_2471	B40|B40_0288	SK11|SK11_2005	AM2|AM2_0066	SK110|SK110_1201	KW10|KW10_1886	KW2|KW2_1839	MG1363|MG1363_2054	NCDO763|NCDO763_2339	N41|N41_0854	V4|V4_1504	LMG8520|LMG8520_2022	IO_1|IO1_1853	LMG8526|LMG8526_0589	KF147|KF147_2023	KF282|KF282_2390	E34|E34_1530	KF201|KF201_0564	M20|M20_1135	ATCC19435|ATCC19435_2439	KF7|KF7_1088	LMG9449|LMG9449_1616	K231|K231_0830	K337|K337_0228	KF24|KF24_1354	Li1|Li1_0916	N42|N42_2532	ML8|ML8_2369	UC317|UC317_0707	KF67|KF67_2126	LMG9446|LMG9446_0480	KF146|KF146_1738	KF134|KF134_0553	KF196|KF196_1633	DRA4|DRA4_1284	IL1403|IL1403_1934	CV56|CV56_1829	KLDS|KLDS_2002	LMG14418|LMG14418_0582	P7266|P7266_0885	44	1
OG_1381	Negative regulator of genetic competence MecA	A76|A76_0637	UC509_9|UC5099_1843	FG2|FG2_1690	HP|HP_1285	LMG6897|LMG6897_2472	B40|B40_0287	SK11|SK11_2006	AM2|AM2_0067	SK110|SK110_1202	KW10|KW10_1885	KW2|KW2_1840	MG1363|MG1363_2055	NCDO763|NCDO763_2340	N41|N41_0853	V4|V4_1503	LMG8520|LMG8520_2021	IO_1|IO1_1854	LMG8526|LMG8526_0590	KF147|KF147_2024	KF282|KF282_2389	E34|E34_1529	KF201|KF201_0565	M20|M20_1136	ATCC19435|ATCC19435_2440	KF7|KF7_1087	LMG9449|LMG9449_1617	K231|K231_0829	K337|K337_0229	KF24|KF24_1353	Li1|Li1_0917	N42|N42_2531	ML8|ML8_2370	UC317|UC317_0706	KF67|KF67_2127	LMG9446|LMG9446_0479	KF146|KF146_1739	KF134|KF134_0554	KF196|KF196_1632	DRA4|DRA4_1285	IL1403|IL1403_1935	CV56|CV56_1830	KLDS|KLDS_2003	LMG14418|LMG14418_0583	P7266|P7266_0886	44	1
OG_1382	Amino acid ABC transporter, ATP-bindingprotein	A76|A76_0636	UC509_9|UC5099_1844	FG2|FG2_1691	HP|HP_1286	LMG6897|LMG6897_2473	B40|B40_0286	SK11|SK11_2007	AM2|AM2_0068	SK110|SK110_1203	KW10|KW10_1884	KW2|KW2_1841	MG1363|MG1363_2056	NCDO763|NCDO763_2341	N41|N41_0852	V4|V4_1502	LMG8520|LMG8520_2020	IO_1|IO1_1855	LMG8526|LMG8526_0591	KF147|KF147_2025	KF282|KF282_2388	E34|E34_1528	KF201|KF201_0566	M20|M20_1137	ATCC19435|ATCC19435_2441	KF7|KF7_1086	LMG9449|LMG9449_1618	K231|K231_0828	K337|K337_0230	KF24|KF24_1352	Li1|Li1_0918	N42|N42_2530	ML8|ML8_2371	UC317|UC317_0705	KF67|KF67_2128	LMG9446|LMG9446_0478	KF146|KF146_1740	KF134|KF134_0555	KF196|KF196_1631	DRA4|DRA4_1286	IL1403|IL1403_1936	CV56|CV56_1831	KLDS|KLDS_2004	LMG14418|LMG14418_0584	P7266|P7266_0887	44	1
OG_1383	transcription regulator	A76|A76_0630	UC509_9|UC5099_1850	FG2|FG2_1697	HP|HP_1292	LMG6897|LMG6897_2479	B40|B40_1717	SK11|SK11_2013	AM2|AM2_0075	SK110|SK110_1209	KW10|KW10_1878	KW2|KW2_1848	MG1363|MG1363_2063	NCDO763|NCDO763_2348	N41|N41_0845	V4|V4_1495	LMG8520|LMG8520_2013	IO_1|IO1_1862	LMG8526|LMG8526_0598	KF147|KF147_2032	KF282|KF282_2381	E34|E34_1521	KF201|KF201_0573	M20|M20_1143	ATCC19435|ATCC19435_2448	KF7|KF7_1079	LMG9449|LMG9449_1625	K231|K231_0822	K337|K337_0237	KF24|KF24_1345	Li1|Li1_0925		ML8|ML8_1192	UC317|UC317_0698	KF67|KF67_2135	LMG9446|LMG9446_0471	KF146|KF146_1747	KF134|KF134_0562	KF196|KF196_1624	DRA4|DRA4_1292	IL1403|IL1403_1943	CV56|CV56_1838	KLDS|KLDS_2011	LMG14418|LMG14418_2311	P7266|P7266_0894	43	FALSE
OG_1384	FIG00756068: hypothetical protein	A76|A76_0627	UC509_9|UC5099_1852	FG2|FG2_1699	HP|HP_1294	LMG6897|LMG6897_2481	B40|B40_1715	SK11|SK11_2015	AM2|AM2_0145	SK110|SK110_1211	KW10|KW10_1876	KW2|KW2_1850	MG1363|MG1363_2065	NCDO763|NCDO763_2350	N41|N41_0843	V4|V4_1493	LMG8520|LMG8520_2011	IO_1|IO1_1864	LMG8526|LMG8526_0602	KF147|KF147_2034	KF282|KF282_0826	E34|E34_1519	KF201|KF201_0575	M20|M20_1147	ATCC19435|ATCC19435_0592	KF7|KF7_2109	LMG9449|LMG9449_1672	K231|K231_1007	K337|K337_0241	KF24|KF24_2561	Li1|Li1_2403	N42|N42_0423	ML8|ML8_1625	UC317|UC317_0112	KF67|KF67_2137	LMG9446|LMG9446_2451	KF146|KF146_1749	KF134|KF134_0564	KF196|KF196_1622	DRA4|DRA4_1294	IL1403|IL1403_1945	CV56|CV56_1840	KLDS|KLDS_2013	LMG14418|LMG14418_2313		43	FALSE
OG_1385	3-ketoacyl-CoA thiolase (EC 2.3.1.16) @Acetyl-CoA acetyltransferase (EC 2.3.1.9)	A76|A76_0939	UC509_9|UC5099_1607	FG2|FG2_0392	HP|HP_0691	LMG6897|LMG6897_0762	B40|B40_1964	SK11|SK11_1694	AM2|AM2_0919	SK110|SK110_1946	KW10|KW10_2250	KW2|KW2_1522	MG1363|MG1363_0958	NCDO763|NCDO763_1768	N41|N41_2431	V4|V4_0379	LMG8520|LMG8520_0481	IO_1|IO1_1558	LMG8526|LMG8526_1819	KF147|KF147_1748	KF282|KF282_1796	E34|E34_0560	KF201|KF201_1923	M20|M20_1174	ATCC19435|ATCC19435_1550	KF7|KF7_0953	LMG9449|LMG9449_1378	K231|K231_1152	K337|K337_1046	KF24|KF24_1252	Li1|Li1_1763	N42|N42_0646	ML8|ML8_2377	UC317|UC317_1028	KF67|KF67_0665	LMG9446|LMG9446_2319	KF146|KF146_0129	KF134|KF134_1221	KF196|KF196_0143	DRA4|DRA4_1968	IL1403|IL1403_1700	CV56|CV56_1573	KLDS|KLDS_1687	LMG14418|LMG14418_0882	P7266|P7266_1110	44	1
OG_1386	Hydroxymethylglutaryl-CoA reductase (EC1.1.1.34)	A76|A76_0940	UC509_9|UC5099_1606	FG2|FG2_0391	HP|HP_0690	LMG6897|LMG6897_0763	B40|B40_1965	SK11|SK11_1693	AM2|AM2_0918	SK110|SK110_1947	KW10|KW10_2251	KW2|KW2_1521	MG1363|MG1363_0959	NCDO763|NCDO763_1769	N41|N41_2432	V4|V4_0378	LMG8520|LMG8520_0482	IO_1|IO1_1557	LMG8526|LMG8526_1818	KF147|KF147_1747	KF282|KF282_1797	E34|E34_0559	KF201|KF201_1924	M20|M20_1175	ATCC19435|ATCC19435_1551	KF7|KF7_0952	LMG9449|LMG9449_1377	K231|K231_1151	K337|K337_1045	KF24|KF24_1253	Li1|Li1_1762	N42|N42_0647	ML8|ML8_2378	UC317|UC317_1029	KF67|KF67_0664	LMG9446|LMG9446_2318	KF146|KF146_0128	KF134|KF134_1220	KF196|KF196_0142	DRA4|DRA4_1969	IL1403|IL1403_1699	CV56|CV56_1572	KLDS|KLDS_1686	LMG14418|LMG14418_0881	P7266|P7266_1111	44	1
OG_1387	Ferrochelatase, protoheme ferro-lyase (EC4.99.1.1)	A76|A76_0943	UC509_9|UC5099_1603	FG2|FG2_0388	HP|HP_0687	LMG6897|LMG6897_0766	B40|B40_1968	SK11|SK11_1690	AM2|AM2_0915	SK110|SK110_1950	KW10|KW10_2254	KW2|KW2_1518	MG1363|MG1363_0962	NCDO763|NCDO763_1772	N41|N41_2435	V4|V4_0375		IO_1|IO1_1554	LMG8526|LMG8526_1815	KF147|KF147_1744	KF282|KF282_1800	E34|E34_0556	KF201|KF201_1927	M20|M20_1178	ATCC19435|ATCC19435_1554	KF7|KF7_0948	LMG9449|LMG9449_1373	K231|K231_1148	K337|K337_1041	KF24|KF24_1256	Li1|Li1_1759	N42|N42_0650	ML8|ML8_2381	UC317|UC317_1032	KF67|KF67_0661	LMG9446|LMG9446_2315	KF146|KF146_0125	KF134|KF134_1217	KF196|KF196_0139	DRA4|DRA4_1972	IL1403|IL1403_1696	CV56|CV56_1569	KLDS|KLDS_1683	LMG14418|LMG14418_0878	P7266|P7266_1114	43	FALSE
OG_1388	Lysophospholipase (EC 3.1.1.5); Monoglyceridelipase (EC 3.1.1.23); putative	A76|A76_0944	UC509_9|UC5099_1602	FG2|FG2_0387	HP|HP_0686	LMG6897|LMG6897_0767	B40|B40_1969	SK11|SK11_1689	AM2|AM2_0914	SK110|SK110_1951	KW10|KW10_2255	KW2|KW2_1517	MG1363|MG1363_0963	NCDO763|NCDO763_1773	N41|N41_2436	V4|V4_0374		IO_1|IO1_1553	LMG8526|LMG8526_1814	KF147|KF147_1743	KF282|KF282_1801	E34|E34_0555	KF201|KF201_1928	M20|M20_1179	ATCC19435|ATCC19435_1555	KF7|KF7_0947	LMG9449|LMG9449_1372	K231|K231_1147	K337|K337_1040	KF24|KF24_1257	Li1|Li1_1758	N42|N42_0651	ML8|ML8_2382	UC317|UC317_1033	KF67|KF67_0660	LMG9446|LMG9446_2314	KF146|KF146_0124	KF134|KF134_1216	KF196|KF196_0138	DRA4|DRA4_1973	IL1403|IL1403_1695	CV56|CV56_1568	KLDS|KLDS_1682	LMG14418|LMG14418_0877	P7266|P7266_1115	43	FALSE
OG_1389	Methionine biosynthesis and transport regulatorMtaR, LysR family	A76|A76_0957	UC509_9|UC5099_1590	FG2|FG2_0376	HP|HP_0675	LMG6897|LMG6897_0778	B40|B40_1980	SK11|SK11_1677	AM2|AM2_0903	SK110|SK110_1962	KW10|KW10_2267	KW2|KW2_1506	MG1363|MG1363_0974	NCDO763|NCDO763_1784	N41|N41_2447	V4|V4_0363	LMG8520|LMG8520_0586	IO_1|IO1_1542	LMG8526|LMG8526_1800	KF147|KF147_1732	KF282|KF282_1815	E34|E34_0544	KF201|KF201_1942	M20|M20_1193	ATCC19435|ATCC19435_1569	KF7|KF7_0936	LMG9449|LMG9449_1357	K231|K231_1133	K337|K337_1026	KF24|KF24_1271	Li1|Li1_1744	N42|N42_0662	ML8|ML8_2393	UC317|UC317_1044	KF67|KF67_0646	LMG9446|LMG9446_2300	KF146|KF146_0110	KF134|KF134_1202	KF196|KF196_0124	DRA4|DRA4_1984	IL1403|IL1403_1684	CV56|CV56_1557	KLDS|KLDS_1671	LMG14418|LMG14418_0866		43	FALSE
OG_139	PTS system, cellobiose-specific IIC component(EC 2.7.1.69)	A76|A76_1740	UC509_9|UC5099_0879	FG2|FG2_1321	HP|HP_0520	LMG6897|LMG6897_2035	B40|B40_0160	SK11|SK11_0870 SK11|SK11_0869	AM2|AM2_2411	SK110|SK110_0529 SK110|SK110_0528	KW10|KW10_1067	KW2|KW2_0743	MG1363|MG1363_1807 MG1363|MG1363_1808	NCDO763|NCDO763_1446 NCDO763|NCDO763_1445	N41|N41_2207	V4|V4_0542	LMG8520|LMG8520_1232	IO_1|IO1_0789	LMG8526|LMG8526_2132	KF147|KF147_0865	KF282|KF282_1648	E34|E34_1082	KF201|KF201_0070	M20|M20_2146	ATCC19435|ATCC19435_2125	KF7|KF7_2182	LMG9449|LMG9449_0175	K231|K231_1222	K337|K337_0699	KF24|KF24_2365	Li1|Li1_0996	N42|N42_2016	ML8|ML8_1727	UC317|UC317_1722	KF67|KF67_1137	LMG9446|LMG9446_2241	KF146|KF146_2059	KF134|KF134_0828	KF196|KF196_0069	DRA4|DRA4_0906 DRA4|DRA4_0905	IL1403|IL1403_0881	CV56|CV56_0842	KLDS|KLDS_0857	LMG14418|LMG14418_0009		43	FALSE
OG_1390	FIG00755288: hypothetical protein	A76|A76_0959	UC509_9|UC5099_1587	FG2|FG2_0373	HP|HP_0672	LMG6897|LMG6897_0781	B40|B40_1982	SK11|SK11_1674	AM2|AM2_0899	SK110|SK110_1965	KW10|KW10_2270	KW2|KW2_1503	MG1363|MG1363_0977	NCDO763|NCDO763_1787	N41|N41_2450	V4|V4_0360		IO_1|IO1_1540	LMG8526|LMG8526_1798	KF147|KF147_1729	KF282|KF282_1818	E34|E34_0542	KF201|KF201_1945	M20|M20_1196	ATCC19435|ATCC19435_1572	KF7|KF7_0933	LMG9449|LMG9449_1354	K231|K231_1130	K337|K337_1024	KF24|KF24_1274	Li1|Li1_1741	N42|N42_0665	ML8|ML8_2397	UC317|UC317_1048	KF67|KF67_0643	LMG9446|LMG9446_2297	KF146|KF146_0107	KF134|KF134_1199	KF196|KF196_0121	DRA4|DRA4_1987	IL1403|IL1403_1680	CV56|CV56_1553	KLDS|KLDS_1668	LMG14418|LMG14418_0863	P7266|P7266_1127	43	FALSE
OG_1391	FIG00755217: hypothetical protein	A76|A76_0960	UC509_9|UC5099_1586	FG2|FG2_0372	HP|HP_0671	LMG6897|LMG6897_0782	B40|B40_1983	SK11|SK11_1673	AM2|AM2_0898	SK110|SK110_1966	KW10|KW10_2271	KW2|KW2_1502	MG1363|MG1363_0978	NCDO763|NCDO763_1788	N41|N41_2451	V4|V4_0359	LMG8520|LMG8520_0590	IO_1|IO1_1539	LMG8526|LMG8526_1797	KF147|KF147_1728	KF282|KF282_1819	E34|E34_0541	KF201|KF201_1946	M20|M20_1197	ATCC19435|ATCC19435_1573	KF7|KF7_0932	LMG9449|LMG9449_1353	K231|K231_1129	K337|K337_1023	KF24|KF24_1275	Li1|Li1_1740	N42|N42_0666	ML8|ML8_2398	UC317|UC317_1049	KF67|KF67_0642	LMG9446|LMG9446_2296	KF146|KF146_0106	KF134|KF134_1198	KF196|KF196_0120	DRA4|DRA4_1988	IL1403|IL1403_1679	CV56|CV56_1552	KLDS|KLDS_1667	LMG14418|LMG14418_0862		43	FALSE
OG_1392	FIG00755797: hypothetical protein	A76|A76_0963	UC509_9|UC5099_1583	FG2|FG2_0369	HP|HP_0984	LMG6897|LMG6897_0785	B40|B40_1986	SK11|SK11_1670	AM2|AM2_0895	SK110|SK110_1969	KW10|KW10_2281	KW2|KW2_1499	MG1363|MG1363_0981	NCDO763|NCDO763_1791	N41|N41_2454	V4|V4_0356	LMG8520|LMG8520_0594	IO_1|IO1_1536	LMG8526|LMG8526_1794	KF147|KF147_1725	KF282|KF282_1822	E34|E34_0538	KF201|KF201_1949	M20|M20_1200	ATCC19435|ATCC19435_1576	KF7|KF7_0929	LMG9449|LMG9449_1350	K231|K231_1126	K337|K337_1020	KF24|KF24_1278	Li1|Li1_1737	N42|N42_0669	ML8|ML8_2401	UC317|UC317_1052	KF67|KF67_0639	LMG9446|LMG9446_2293	KF146|KF146_0103	KF134|KF134_1195	KF196|KF196_0117	DRA4|DRA4_1991	IL1403|IL1403_1676	CV56|CV56_1549	KLDS|KLDS_1664	LMG14418|LMG14418_0859	P7266|P7266_1131	44	1
OG_1393	Alcohol dehydrogenase (EC 1.1.1.1)	A76|A76_0965	UC509_9|UC5099_1581	FG2|FG2_0367	HP|HP_0982	LMG6897|LMG6897_0787	B40|B40_1988	SK11|SK11_1668	AM2|AM2_0893	SK110|SK110_1971	KW10|KW10_2283	KW2|KW2_1497	MG1363|MG1363_0983	NCDO763|NCDO763_1793	N41|N41_2456	V4|V4_0354	LMG8520|LMG8520_0596	IO_1|IO1_1534	LMG8526|LMG8526_1792	KF147|KF147_1723	KF282|KF282_1824	E34|E34_0536	KF201|KF201_1951	M20|M20_1202	ATCC19435|ATCC19435_1578	KF7|KF7_0926	LMG9449|LMG9449_1348	K231|K231_1124	K337|K337_1018	KF24|KF24_1280	Li1|Li1_1735	N42|N42_0671	ML8|ML8_2403	UC317|UC317_1054	KF67|KF67_0637	LMG9446|LMG9446_2291	KF146|KF146_0101	KF134|KF134_1193	KF196|KF196_0115	DRA4|DRA4_1993	IL1403|IL1403_1674	CV56|CV56_1547	KLDS|KLDS_1662	LMG14418|LMG14418_0857	P7266|P7266_1364	44	1
OG_1394	PTS system, beta-glucoside-specific IIBcomponent (EC 2.7.1.69) / PTS system,beta-glucoside-specific IIC component (EC 2.7.1.69) / PTSsystem, beta-glucoside-specific IIA component (EC2.7.1.69)	A76|A76_1107					B40|B40_2452	SK11|SK11_1567 SK11|SK11_1568	AM2|AM2_2156	SK110|SK110_2206 SK110|SK110_2207	KW10|KW10_1969	KW2|KW2_1390	MG1363|MG1363_1087	NCDO763|NCDO763_1141	N41|N41_2124	V4|V4_0255	LMG8520|LMG8520_0536	IO_1|IO1_1436	LMG8526|LMG8526_1179	KF147|KF147_1613	KF282|KF282_1925	E34|E34_0442	KF201|KF201_2032	M20|M20_1244	ATCC19435|ATCC19435_1886	KF7|KF7_0506	LMG9449|LMG9449_2217	K231|K231_1979	K337|K337_2013	KF24|KF24_2475	Li1|Li1_1642	N42|N42_0736	ML8|ML8_1535	UC317|UC317_1374	KF67|KF67_1066	LMG9446|LMG9446_1551	KF146|KF146_0826	KF134|KF134_0084	KF196|KF196_1191	DRA4|DRA4_2252 DRA4|DRA4_2253	IL1403|IL1403_1581	CV56|CV56_1455	KLDS|KLDS_1567	LMG14418|LMG14418_0371	P7266|P7266_1212	40	FALSE
OG_1395	Permease of the drug/metabolite transporter(DMT) superfamily	A76|A76_1083		FG2|FG2_0340	HP|HP_1117	LMG6897|LMG6897_0177	B40|B40_1775	SK11|SK11_1590	AM2|AM2_2137	SK110|SK110_2229	KW10|KW10_1986	KW2|KW2_1412	MG1363|MG1363_1060	NCDO763|NCDO763_2332	N41|N41_2146	V4|V4_0277	LMG8520|LMG8520_0723	IO_1|IO1_1457	LMG8526|LMG8526_1197	KF147|KF147_1629	KF282|KF282_1907	E34|E34_0458	KF201|KF201_2015	M20|M20_1261	ATCC19435|ATCC19435_1903	KF7|KF7_0523	LMG9449|LMG9449_2235	K231|K231_1961	K337|K337_1997	KF24|KF24_2493	Li1|Li1_1660	N42|N42_0754	ML8|ML8_1518	UC317|UC317_1355	KF67|KF67_1048	LMG9446|LMG9446_1570	KF146|KF146_0808	KF134|KF134_0066	KF196|KF196_1173	DRA4|DRA4_2231	IL1403|IL1403_1599	CV56|CV56_1474	KLDS|KLDS_1586	LMG14418|LMG14418_1774	P7266|P7266_1193	43	FALSE
OG_1396	Transcriptional regulator, MerR family	A76|A76_1081	UC509_9|UC5099_1516	FG2|FG2_0338	HP|HP_1115	LMG6897|LMG6897_0175	B40|B40_1777	SK11|SK11_1591	AM2|AM2_2136	SK110|SK110_2230	KW10|KW10_1987	KW2|KW2_1413	MG1363|MG1363_1059	NCDO763|NCDO763_2331	N41|N41_2147	V4|V4_0278	LMG8520|LMG8520_0724	IO_1|IO1_1458	LMG8526|LMG8526_1198	KF147|KF147_1630	KF282|KF282_1906	E34|E34_0459	KF201|KF201_2014	M20|M20_1262	ATCC19435|ATCC19435_1904	KF7|KF7_0524	LMG9449|LMG9449_2236	K231|K231_1960	K337|K337_1996	KF24|KF24_2494	Li1|Li1_1661	N42|N42_0755	ML8|ML8_1517	UC317|UC317_1354	KF67|KF67_1047	LMG9446|LMG9446_1571	KF146|KF146_0807	KF134|KF134_0065	KF196|KF196_1172	DRA4|DRA4_2230	IL1403|IL1403_1600	CV56|CV56_1475	KLDS|KLDS_1587	LMG14418|LMG14418_1775		43	FALSE
OG_1397	Chorismate mutase I (EC 5.4.99.5)	A76|A76_2548	UC509_9|UC5099_2290	FG2|FG2_0790	HP|HP_2153	LMG6897|LMG6897_0149	B40|B40_1326	SK11|SK11_2532	AM2|AM2_2445	SK110|SK110_1371	KW10|KW10_0935	KW2|KW2_2249	MG1363|MG1363_2564	NCDO763|NCDO763_0514	N41|N41_2618	V4|V4_1202	LMG8520|LMG8520_2291	IO_1|IO1_2265	LMG8526|LMG8526_2444	KF147|KF147_2506	KF282|KF282_1761	E34|E34_2254	KF201|KF201_2287	M20|M20_1306	ATCC19435|ATCC19435_0480	KF7|KF7_1064	LMG9449|LMG9449_0454	K231|K231_1109	K337|K337_2349	KF24|KF24_1899	Li1|Li1_2326	N42|N42_1311	ML8|ML8_1976	UC317|UC317_1635	KF67|KF67_2233	LMG9446|LMG9446_1534	KF146|KF146_0728	KF134|KF134_0105	KF196|KF196_1093	DRA4|DRA4_1406	IL1403|IL1403_2376	CV56|CV56_2345	KLDS|KLDS_2531	LMG14418|LMG14418_0243	P7266|P7266_1694	44	1
OG_1398	Single-stranded DNA-binding protein	A76|A76_2541	UC509_9|UC5099_2283	FG2|FG2_1621	HP|HP_2457	LMG6897|LMG6897_0194	B40|B40_1333	SK11|SK11_2525	AM2|AM2_2438	SK110|SK110_1364	KW10|KW10_0942	KW2|KW2_2242	MG1363|MG1363_2557	NCDO763|NCDO763_0507	N41|N41_2626	V4|V4_1209	LMG8520|LMG8520_2299	IO_1|IO1_2255	LMG8526|LMG8526_2452	KF147|KF147_2499	KF282|KF282_1768	E34|E34_2262	KF201|KF201_2295	M20|M20_1314	ATCC19435|ATCC19435_0487	KF7|KF7_1071	LMG9449|LMG9449_0461	K231|K231_1116	K337|K337_2358	KF24|KF24_0595	Li1|Li1_2333	N42|N42_1318	ML8|ML8_1969	UC317|UC317_1628	KF67|KF67_2241	LMG9446|LMG9446_1541	KF146|KF146_0735	KF134|KF134_0112	KF196|KF196_1100	DRA4|DRA4_1399	IL1403|IL1403_2369	CV56|CV56_2338	KLDS|KLDS_2524	LMG14418|LMG14418_0235	P7266|P7266_1686	44	1
OG_1399	SSU ribosomal protein S18p @ SSU ribosomalprotein S18p, zinc-independent	A76|A76_2540	UC509_9|UC5099_2282	FG2|FG2_1620	HP|HP_2458	LMG6897|LMG6897_0195	B40|B40_1334	SK11|SK11_2524	AM2|AM2_2437	SK110|SK110_1363	KW10|KW10_0943	KW2|KW2_2241	MG1363|MG1363_2556	NCDO763|NCDO763_0506	N41|N41_2627	V4|V4_1210	LMG8520|LMG8520_2300	IO_1|IO1_2254	LMG8526|LMG8526_2453	KF147|KF147_2498	KF282|KF282_1769	E34|E34_2263	KF201|KF201_2296	M20|M20_1315	ATCC19435|ATCC19435_0488	KF7|KF7_1072	LMG9449|LMG9449_0462	K231|K231_1117	K337|K337_2359	KF24|KF24_0594	Li1|Li1_2334	N42|N42_1319	ML8|ML8_1968	UC317|UC317_1627	KF67|KF67_2242	LMG9446|LMG9446_1542	KF146|KF146_0736	KF134|KF134_0113	KF196|KF196_1101	DRA4|DRA4_1398	IL1403|IL1403_2368	CV56|CV56_2337	KLDS|KLDS_2523	LMG14418|LMG14418_0234	P7266|P7266_1685	44	1
OG_14	Oligopeptide ABC transporter, periplasmicoligopeptide-binding protein OppA (TC 3.A.1.5.1)	A76|A76_0403 A76|A76_0404	UC509_9|UC5099_0370 UC509_9|UC5099_0371	FG2|FG2_0266 FG2|FG2_0433	HP|HP_0016 HP|HP_1322	LMG6897|LMG6897_2055 LMG6897|LMG6897_0759	B40|B40_1463 B40|B40_1464	SK11|SK11_0383 SK11|SK11_0384	AM2|AM2_0725 AM2|AM2_0726	SK110|SK110_0906 SK110|SK110_0907	KW10|KW10_1463 KW10|KW10_1464	KW2|KW2_0337 KW2|KW2_0338	MG1363|MG1363_0376	NCDO763|NCDO763_1004	N41|N41_1075 N41|N41_1076	V4|V4_2010 V4|V4_2011	LMG8520|LMG8520_2134 LMG8520|LMG8520_2136	IO_1|IO1_0330 IO_1|IO1_0331	LMG8526|LMG8526_0031 LMG8526|LMG8526_0032	KF147|KF147_0412 KF147|KF147_0413	KF282|KF282_0570 KF282|KF282_0571	E34|E34_1283 E34|E34_1284	KF201|KF201_0278 KF201|KF201_0279	M20|M20_0316 M20|M20_0317	ATCC19435|ATCC19435_1063 ATCC19435|ATCC19435_1064	KF7|KF7_0215 KF7|KF7_0216	LMG9449|LMG9449_1062 LMG9449|LMG9449_1063	K231|K231_1499 K231|K231_1500	K337|K337_0487 K337|K337_0488	KF24|KF24_1217 KF24|KF24_1218	Li1|Li1_2080 Li1|Li1_2081	N42|N42_0281 N42|N42_0282	ML8|ML8_0090 ML8|ML8_0091	UC317|UC317_0263 UC317|UC317_0264	KF67|KF67_1577 KF67|KF67_1578	LMG9446|LMG9446_0724 LMG9446|LMG9446_0725	KF146|KF146_2119 KF146|KF146_2120	KF134|KF134_0986 KF134|KF134_0987	KF196|KF196_0261 KF196|KF196_0262	DRA4|DRA4_1643 DRA4|DRA4_1644	IL1403|IL1403_0380 IL1403|IL1403_0381	CV56|CV56_0375 CV56|CV56_0377	KLDS|KLDS_0419 KLDS|KLDS_0420	LMG14418|LMG14418_0959 LMG14418|LMG14418_0960	P7266|P7266_0454 P7266|P7266_0455	44	1
OG_140	Uncharacterized threonine-rich protein C1742.01precursor	A76|A76_1815	UC509_9|UC5099_0804	FG2|FG2_2490	HP|HP_1215	LMG6897|LMG6897_1749	B40|B40_2160	SK11|SK11_0792	AM2|AM2_0830	SK110|SK110_1528	KW10|KW10_1139	KW2|KW2_0681	MG1363|MG1363_1871	NCDO763|NCDO763_1382	N41|N41_2272	V4|V4_0480	LMG8520|LMG8520_2471 LMG8520|LMG8520_2475	IO_1|IO1_0721	LMG8526|LMG8526_2068	KF147|KF147_0804	KF282|KF282_1586	E34|E34_1144	KF201|KF201_0007	M20|M20_2207	ATCC19435|ATCC19435_2064	KF7|KF7_2121	LMG9449|LMG9449_0237	K231|K231_1284	K337|K337_0760	KF24|KF24_2303	Li1|Li1_1058	N42|N42_1952	ML8|ML8_1791	UC317|UC317_1659	KF67|KF67_1075	LMG9446|LMG9446_2180	KF146|KF146_1997 KF146|KF146_1996	KF134|KF134_0766	KF196|KF196_0007	DRA4|DRA4_0918	IL1403|IL1403_0817	CV56|CV56_0778	KLDS|KLDS_0794	LMG14418|LMG14418_0825	P7266|P7266_1614	44	1
OG_1400	probably a phosphohydrolase, evidenced byCOGnitor	A76|A76_2539	UC509_9|UC5099_2281	FG2|FG2_1619	HP|HP_2459	LMG6897|LMG6897_0196	B40|B40_1335	SK11|SK11_2523	AM2|AM2_2436	SK110|SK110_1362	KW10|KW10_0944	KW2|KW2_2240	MG1363|MG1363_2555	NCDO763|NCDO763_0505	N41|N41_2628	V4|V4_1211	LMG8520|LMG8520_2301	IO_1|IO1_2253	LMG8526|LMG8526_2454	KF147|KF147_2497	KF282|KF282_1770	E34|E34_2264	KF201|KF201_2297	M20|M20_1316	ATCC19435|ATCC19435_0489	KF7|KF7_1073	LMG9449|LMG9449_0463	K231|K231_1118	K337|K337_2360	KF24|KF24_0593	Li1|Li1_2335	N42|N42_1320	ML8|ML8_1967	UC317|UC317_1626	KF67|KF67_2243	LMG9446|LMG9446_1543	KF146|KF146_0737	KF134|KF134_0114	KF196|KF196_1102	DRA4|DRA4_1397	IL1403|IL1403_2367	CV56|CV56_2336	KLDS|KLDS_2522	LMG14418|LMG14418_0233	P7266|P7266_1684	44	1
OG_1401	FIG00755774: hypothetical protein	A76|A76_2538	UC509_9|UC5099_2280	FG2|FG2_1618	HP|HP_2460	LMG6897|LMG6897_0197	B40|B40_1336	SK11|SK11_2522	AM2|AM2_2435	SK110|SK110_1361	KW10|KW10_0945	KW2|KW2_2239	MG1363|MG1363_2554	NCDO763|NCDO763_0503	N41|N41_2630	V4|V4_1213	LMG8520|LMG8520_2302	IO_1|IO1_2252	LMG8526|LMG8526_2455	KF147|KF147_2496	KF282|KF282_1771	E34|E34_2265	KF201|KF201_2298	M20|M20_1317	ATCC19435|ATCC19435_0490	KF7|KF7_1074	LMG9449|LMG9449_0464	K231|K231_1119	K337|K337_2361	KF24|KF24_0592	Li1|Li1_2336	N42|N42_1321	ML8|ML8_1966	UC317|UC317_1625	KF67|KF67_2244	LMG9446|LMG9446_1544	KF146|KF146_0738	KF134|KF134_0115	KF196|KF196_1103	DRA4|DRA4_1396	IL1403|IL1403_2366	CV56|CV56_2335	KLDS|KLDS_2521	LMG14418|LMG14418_0232	P7266|P7266_1683	44	1
OG_1402	Sialic acid utilization regulator, RpiR family	A76|A76_2537	UC509_9|UC5099_2279	FG2|FG2_1617	HP|HP_2461	LMG6897|LMG6897_0198	B40|B40_1337	SK11|SK11_2521	AM2|AM2_2434	SK110|SK110_1360	KW10|KW10_0946	KW2|KW2_2238	MG1363|MG1363_2553	NCDO763|NCDO763_0502	N41|N41_2631	V4|V4_1214	LMG8520|LMG8520_2303	IO_1|IO1_2251	LMG8526|LMG8526_2456	KF147|KF147_2495	KF282|KF282_1772	E34|E34_2266	KF201|KF201_2299	M20|M20_1318	ATCC19435|ATCC19435_0491	KF7|KF7_1075	LMG9449|LMG9449_0465	K231|K231_1120	K337|K337_2362	KF24|KF24_0591	Li1|Li1_2337	N42|N42_1322	ML8|ML8_1965	UC317|UC317_1624	KF67|KF67_2245	LMG9446|LMG9446_1545	KF146|KF146_0739	KF134|KF134_0116	KF196|KF196_1104	DRA4|DRA4_1395	IL1403|IL1403_2365	CV56|CV56_2334	KLDS|KLDS_2520	LMG14418|LMG14418_0231	P7266|P7266_1682	44	1
OG_1403	6-phosphogluconate dehydrogenase,decarboxylating (EC 1.1.1.44)	A76|A76_2536	UC509_9|UC5099_2278	FG2|FG2_1616	HP|HP_2462	LMG6897|LMG6897_0199	B40|B40_1338	SK11|SK11_2520	AM2|AM2_2433	SK110|SK110_1359	KW10|KW10_0947	KW2|KW2_2237	MG1363|MG1363_2552	NCDO763|NCDO763_0501	N41|N41_2632	V4|V4_1215	LMG8520|LMG8520_2304	IO_1|IO1_2250	LMG8526|LMG8526_2457	KF147|KF147_2494	KF282|KF282_1773	E34|E34_2267	KF201|KF201_2300	M20|M20_1319	ATCC19435|ATCC19435_0492	KF7|KF7_1076	LMG9449|LMG9449_0466	K231|K231_1121	K337|K337_2363	KF24|KF24_0590	Li1|Li1_2338	N42|N42_1323	ML8|ML8_1964	UC317|UC317_0405	KF67|KF67_2246	LMG9446|LMG9446_1546	KF146|KF146_0740	KF134|KF134_0117	KF196|KF196_1105	DRA4|DRA4_1394	IL1403|IL1403_2364	CV56|CV56_2333	KLDS|KLDS_2519	LMG14418|LMG14418_0230	P7266|P7266_1680	44	1
OG_1404	Gluconokinase (EC 2.7.1.12)	A76|A76_2535	UC509_9|UC5099_2277	FG2|FG2_1615	HP|HP_2463	LMG6897|LMG6897_0200	B40|B40_1339	SK11|SK11_2519	AM2|AM2_2432	SK110|SK110_1358	KW10|KW10_0948	KW2|KW2_2236	MG1363|MG1363_2551	NCDO763|NCDO763_0500	N41|N41_2633	V4|V4_1216	LMG8520|LMG8520_2305	IO_1|IO1_2249	LMG8526|LMG8526_2458	KF147|KF147_2493	KF282|KF282_1774	E34|E34_2268	KF201|KF201_2301	M20|M20_1320	ATCC19435|ATCC19435_0493	KF7|KF7_1077	LMG9449|LMG9449_0467	K231|K231_1122	K337|K337_2364	KF24|KF24_0589	Li1|Li1_2339	N42|N42_1324	ML8|ML8_1963	UC317|UC317_0406	KF67|KF67_2247	LMG9446|LMG9446_1547	KF146|KF146_0741	KF134|KF134_0118	KF196|KF196_1106	DRA4|DRA4_1393	IL1403|IL1403_2363	CV56|CV56_2332	KLDS|KLDS_2518	LMG14418|LMG14418_0229	P7266|P7266_1679	44	1
OG_1405	N-acetylmannosamine-6-phosphate 2-epimerase (EC5.1.3.9)	A76|A76_1377	UC509_9|UC5099_1256	FG2|FG2_2126	HP|HP_0918	LMG6897|LMG6897_1416	B40|B40_0506	SK11|SK11_1369	AM2|AM2_2189	SK110|SK110_2171	KW10|KW10_1224	KW2|KW2_1134	MG1363|MG1363_1372	NCDO763|NCDO763_0829	N41|N41_1200	V4|V4_1239	LMG8520|LMG8520_0597	IO_1|IO1_1127	LMG8526|LMG8526_1612	KF147|KF147_1245	KF282|KF282_1998	E34|E34_2219	KF201|KF201_1106	M20|M20_1323	ATCC19435|ATCC19435_2202	KF7|KF7_1683	LMG9449|LMG9449_1694	K231|K231_2154	K337|K337_1474	KF24|KF24_1669	Li1|Li1_0668	N42|N42_1811	ML8|ML8_2443	UC317|UC317_2446	KF67|KF67_0414	LMG9446|LMG9446_0380	KF146|KF146_0700	KF134|KF134_1829	KF196|KF196_0746	DRA4|DRA4_2030	IL1403|IL1403_1269	CV56|CV56_1229	KLDS|KLDS_1311	LMG14418|LMG14418_1641	P7266|P7266_1373	44	1
OG_1406	SAM-dependent methyltransferase	A76|A76_1373	UC509_9|UC5099_1261	FG2|FG2_2131	HP|HP_0913	LMG6897|LMG6897_1411	B40|B40_0510	SK11|SK11_1365	AM2|AM2_2193	SK110|SK110_2167	KW10|KW10_1220	KW2|KW2_1138	MG1363|MG1363_1368	NCDO763|NCDO763_0833	N41|N41_1196	V4|V4_1243	LMG8520|LMG8520_0601	IO_1|IO1_1131	LMG8526|LMG8526_1616	KF147|KF147_1249	KF282|KF282_1991	E34|E34_2215	KF201|KF201_1110	M20|M20_1327	ATCC19435|ATCC19435_2196	KF7|KF7_1688	LMG9449|LMG9449_1690	K231|K231_2150	K337|K337_1470	KF24|KF24_1673	Li1|Li1_0672	N42|N42_1816	ML8|ML8_2449	UC317|UC317_2440	KF67|KF67_1817	LMG9446|LMG9446_0385	KF146|KF146_0696	KF134|KF134_1803	KF196|KF196_0742	DRA4|DRA4_2034	IL1403|IL1403_1275	CV56|CV56_1234	KLDS|KLDS_1318	LMG14418|LMG14418_1635	P7266|P7266_1524	44	1
OG_1407	Mg(2+) transport ATPase protein C	A76|A76_0885	UC509_9|UC5099_1648	FG2|FG2_1373	HP|HP_0281	LMG6897|LMG6897_2407	B40|B40_1043	SK11|SK11_1755	AM2|AM2_0968	SK110|SK110_0541	KW10|KW10_0311	KW2|KW2_1575	MG1363|MG1363_0901	NCDO763|NCDO763_0023	N41|N41_1972	V4|V4_1335	LMG8520|LMG8520_2664	IO_1|IO1_1608	LMG8526|LMG8526_1946	KF147|KF147_1822	KF282|KF282_1411	E34|E34_0610	KF201|KF201_2148	M20|M20_1358	ATCC19435|ATCC19435_0005	KF7|KF7_0797	LMG9449|LMG9449_0543	K231|K231_2278	K337|K337_2236	KF24|KF24_0570	Li1|Li1_0127	N42|N42_1659	ML8|ML8_0535	UC317|UC317_0976	KF67|KF67_1205	LMG9446|LMG9446_2077	KF146|KF146_1549	KF134|KF134_2334	KF196|KF196_2240	DRA4|DRA4_0574	IL1403|IL1403_1751	CV56|CV56_1624	KLDS|KLDS_1797	LMG14418|LMG14418_1236	P7266|P7266_1054	44	1
OG_1408	FIG00755373: hypothetical protein	A76|A76_0880	UC509_9|UC5099_1654	FG2|FG2_1368	HP|HP_1207	LMG6897|LMG6897_2170	B40|B40_1048	SK11|SK11_1760	AM2|AM2_0973	SK110|SK110_0546	KW10|KW10_0302	KW2|KW2_1580	MG1363|MG1363_0895	NCDO763|NCDO763_0029	N41|N41_1966	V4|V4_1340	LMG8520|LMG8520_2658	IO_1|IO1_1613	LMG8526|LMG8526_1951	KF147|KF147_1827	KF282|KF282_1406	E34|E34_0615	KF201|KF201_2143	M20|M20_1363	ATCC19435|ATCC19435_0010	KF7|KF7_0802	LMG9449|LMG9449_0538	K231|K231_2273	K337|K337_2231	KF24|KF24_0565	Li1|Li1_0132	N42|N42_1664	ML8|ML8_0540	UC317|UC317_0971	KF67|KF67_1200	LMG9446|LMG9446_2072	KF146|KF146_1554	KF134|KF134_2339	KF196|KF196_2235	DRA4|DRA4_0579	IL1403|IL1403_1756	CV56|CV56_1629	KLDS|KLDS_1802	LMG14418|LMG14418_1241		43	FALSE
OG_1409	LacX protein, plasmid	A76|A76_0871	UC509_9|UC5099_1664	FG2|FG2_2444	HP|HP_0651	LMG6897|LMG6897_2329	B40|B40_1060	SK11|SK11_1770	AM2|AM2_0979	SK110|SK110_0696	KW10|KW10_0293	KW2|KW2_1588	MG1363|MG1363_0886	NCDO763|NCDO763_0038	N41|N41_1958	V4|V4_1348 V4|V4_1349		IO_1|IO1_1621	LMG8526|LMG8526_1960	KF147|KF147_1835	KF282|KF282_1401	E34|E34_0623	KF201|KF201_2135	M20|M20_1371	ATCC19435|ATCC19435_0019	KF7|KF7_0810	LMG9449|LMG9449_0529	K231|K231_2264	K337|K337_2223	KF24|KF24_0557	Li1|Li1_0141	N42|N42_1672	ML8|ML8_0545	UC317|UC317_0966	KF67|KF67_1192	LMG9446|LMG9446_2063	KF146|KF146_1562	KF134|KF134_2347	KF196|KF196_2227	DRA4|DRA4_0739	IL1403|IL1403_1761	CV56|CV56_1634	KLDS|KLDS_1807	LMG14418|LMG14418_2185		42	FALSE
OG_141	Phenolic acid decarboxylase (EC 4.1.1.-)	A76|A76_2230	UC509_9|UC5099_2009	FG2|FG2_2606	HP|HP_0239	LMG6897|LMG6897_0001	B40|B40_0729	SK11|SK11_2227 SK11|SK11_2226	AM2|AM2_1874	SK110|SK110_1644 SK110|SK110_1645	KW10|KW10_0358	KW2|KW2_1987	MG1363|MG1363_2277	NCDO763|NCDO763_0613	N41|N41_1462	V4|V4_0905	LMG8520|LMG8520_0015	IO_1|IO1_2020	LMG8526|LMG8526_0191	KF147|KF147_2187	KF282|KF282_0182	E34|E34_2124	KF201|KF201_1758	M20|M20_2402	ATCC19435|ATCC19435_1607	KF7|KF7_1240	LMG9449|LMG9449_0026	K231|K231_0203	K337|K337_1204	KF24|KF24_0155	Li1|Li1_0174	N42|N42_2285	ML8|ML8_0929	UC317|UC317_2364	KF67|KF67_1488	LMG9446|LMG9446_1283	KF146|KF146_1074	KF134|KF134_1892	KF196|KF196_1219	DRA4|DRA4_0501 DRA4|DRA4_0502	IL1403|IL1403_2089	CV56|CV56_2041	KLDS|KLDS_2210	LMG14418|LMG14418_0315	P7266|P7266_1568	44	1
OG_1410	putative transport protein	A76|A76_0866	UC509_9|UC5099_1670	FG2|FG2_2450	HP|HP_0657	LMG6897|LMG6897_2323	B40|B40_1067	SK11|SK11_1775	AM2|AM2_0985	SK110|SK110_0701	KW10|KW10_0288	KW2|KW2_1594	MG1363|MG1363_0881	NCDO763|NCDO763_0043	N41|N41_1953	V4|V4_1354		IO_1|IO1_1626	LMG8526|LMG8526_1965	KF147|KF147_1840	KF282|KF282_1395	E34|E34_0628	KF201|KF201_2129	M20|M20_1377	ATCC19435|ATCC19435_0025	KF7|KF7_0815	LMG9449|LMG9449_0523	K231|K231_2258	K337|K337_2217	KF24|KF24_0552	Li1|Li1_0147	N42|N42_1678	ML8|ML8_0551	UC317|UC317_0960	KF67|KF67_1186	LMG9446|LMG9446_2057	KF146|KF146_1569	KF134|KF134_2353	KF196|KF196_2221	DRA4|DRA4_0744	IL1403|IL1403_1767	CV56|CV56_1640	KLDS|KLDS_1813	LMG14418|LMG14418_2179	P7266|P7266_1044	43	FALSE
OG_1411	Transcriptional regulator, MerR family	A76|A76_0286	UC509_9|UC5099_0244	FG2|FG2_1463	HP|HP_0032	LMG6897|LMG6897_0522	B40|B40_2228	SK11|SK11_0238	AM2|AM2_2388	SK110|SK110_1050	KW10|KW10_1630	KW2|KW2_0223	MG1363|MG1363_0255	NCDO763|NCDO763_0342	N41|N41_0305	V4|V4_2246	LMG8520|LMG8520_1853	IO_1|IO1_0213	LMG8526|LMG8526_1276	KF147|KF147_0239	KF282|KF282_0457	E34|E34_0167	KF201|KF201_0168	M20|M20_1381	ATCC19435|ATCC19435_0952	KF7|KF7_0704	LMG9449|LMG9449_1174	K231|K231_1618	K337|K337_0377	KF24|KF24_1107	Li1|Li1_1972	N42|N42_0171	ML8|ML8_0427	UC317|UC317_0002	KF67|KF67_0312	LMG9446|LMG9446_0944	KF146|KF146_0293	KF134|KF134_1338	KF196|KF196_2320	DRA4|DRA4_0995	IL1403|IL1403_0268	CV56|CV56_0262	KLDS|KLDS_0291	LMG14418|LMG14418_2113		43	FALSE
OG_1412	Transcriptional regulator, TetR family	A76|A76_0284	UC509_9|UC5099_0241	FG2|FG2_1461	HP|HP_0030	LMG6897|LMG6897_0524	B40|B40_2226	SK11|SK11_0236	AM2|AM2_2391	SK110|SK110_1048	KW10|KW10_1632	KW2|KW2_0221	MG1363|MG1363_0253	NCDO763|NCDO763_0340	N41|N41_0303	V4|V4_2244	LMG8520|LMG8520_1851	IO_1|IO1_0211	LMG8526|LMG8526_1279	KF147|KF147_0236	KF282|KF282_0455	E34|E34_0169	KF201|KF201_0166	M20|M20_1383	ATCC19435|ATCC19435_0950	KF7|KF7_0701	LMG9449|LMG9449_1176	K231|K231_1620	K337|K337_0375	KF24|KF24_1105	Li1|Li1_1970	N42|N42_0169	ML8|ML8_0429	UC317|UC317_0004	KF67|KF67_0314	LMG9446|LMG9446_0946	KF146|KF146_0291	KF134|KF134_1340	KF196|KF196_2322	DRA4|DRA4_0997	IL1403|IL1403_0266	CV56|CV56_0260	KLDS|KLDS_0288	LMG14418|LMG14418_2116		43	FALSE
OG_1413	Glycosyltransferase involved in cell wallbiogenesis (EC 2.4.-.-); Glycosyl transferase, group 2family protein	A76|A76_0255	UC509_9|UC5099_0211	FG2|FG2_0648	HP|HP_0555	LMG6897|LMG6897_0557	B40|B40_0559	SK11|SK11_0206	AM2|AM2_1613	SK110|SK110_1018	KW10|KW10_1670	KW2|KW2_0190	MG1363|MG1363_0222	NCDO763|NCDO763_0699	N41|N41_0271	V4|V4_2500	LMG8520|LMG8520_1820	IO_1|IO1_0181	LMG8526|LMG8526_1308	KF147|KF147_0208	KF282|KF282_0428	E34|E34_0200	KF201|KF201_1432	M20|M20_1416	ATCC19435|ATCC19435_0921	KF7|KF7_0674	LMG9449|LMG9449_1204	K231|K231_1648	K337|K337_0780	KF24|KF24_1077	Li1|Li1_1942	N42|N42_2164	ML8|ML8_0455	UC317|UC317_0030	KF67|KF67_0341	LMG9446|LMG9446_0975	KF146|KF146_0263	KF134|KF134_1367	KF196|KF196_2197	DRA4|DRA4_1027	IL1403|IL1403_0236	CV56|CV56_0232	KLDS|KLDS_0259	LMG14418|LMG14418_0510	P7266|P7266_0834	44	1
OG_1414	FIG00755238: hypothetical protein	A76|A76_0230	UC509_9|UC5099_0184	FG2|FG2_0627	HP|HP_0577	LMG6897|LMG6897_0579	B40|B40_0580	SK11|SK11_0184	AM2|AM2_1638	SK110|SK110_0996	KW10|KW10_1694	KW2|KW2_0170		NCDO763|NCDO763_0719	N41|N41_0250	V4|V4_2479	LMG8520|LMG8520_1796	IO_1|IO1_0158	LMG8526|LMG8526_1333	KF147|KF147_0184	KF282|KF282_0405	E34|E34_0224	KF201|KF201_1409	M20|M20_1439	ATCC19435|ATCC19435_0897	KF7|KF7_0651	LMG9449|LMG9449_1228	K231|K231_1672	K337|K337_0801	KF24|KF24_1054	Li1|Li1_1918	N42|N42_2189	ML8|ML8_0483	UC317|UC317_0059	KF67|KF67_0368	LMG9446|LMG9446_1001	KF146|KF146_0237	KF134|KF134_1393	KF196|KF196_2171	DRA4|DRA4_1049	IL1403|IL1403_0212	CV56|CV56_0204	KLDS|KLDS_0234	LMG14418|LMG14418_0485	P7266|P7266_0812	43	FALSE
OG_1415	1,4-dihydroxy-2-naphthoateoctaprenyltransferase (EC 2.5.1.74)	A76|A76_0229	UC509_9|UC5099_0182	FG2|FG2_0626	HP|HP_0578	LMG6897|LMG6897_0580	B40|B40_0581	SK11|SK11_0183	AM2|AM2_1640	SK110|SK110_0995	KW10|KW10_1696	KW2|KW2_0169	MG1363|MG1363_0200	NCDO763|NCDO763_0721	N41|N41_0249	V4|V4_2478	LMG8520|LMG8520_1794	IO_1|IO1_0156	LMG8526|LMG8526_1335	KF147|KF147_0182	KF282|KF282_0403	E34|E34_0226	KF201|KF201_1407	M20|M20_1441	ATCC19435|ATCC19435_0895	KF7|KF7_0649	LMG9449|LMG9449_1230	K231|K231_1674	K337|K337_0803	KF24|KF24_1052	Li1|Li1_1916	N42|N42_2191	ML8|ML8_0485	UC317|UC317_0061	KF67|KF67_0370	LMG9446|LMG9446_1003	KF146|KF146_0235	KF134|KF134_1395	KF196|KF196_2169	DRA4|DRA4_1050	IL1403|IL1403_0208	CV56|CV56_0202	KLDS|KLDS_0232	LMG14418|LMG14418_0483	P7266|P7266_0811	44	1
OG_1416	Aspartate aminotransferase (EC 2.6.1.1)	A76|A76_0203	UC509_9|UC5099_0156	FG2|FG2_0600	HP|HP_0604	LMG6897|LMG6897_0606	B40|B40_0606	SK11|SK11_0158	AM2|AM2_1666	SK110|SK110_0970	KW10|KW10_1722	KW2|KW2_0143	MG1363|MG1363_0174	NCDO763|NCDO763_0747	N41|N41_0223	V4|V4_2453	LMG8520|LMG8520_0502	IO_1|IO1_0129	LMG8526|LMG8526_1360	KF147|KF147_0153	KF282|KF282_0379	E34|E34_0254	KF201|KF201_1380	M20|M20_1469	ATCC19435|ATCC19435_0797	KF7|KF7_1916	LMG9449|LMG9449_1255	K231|K231_0002	K337|K337_0830	KF24|KF24_1026	Li1|Li1_1890	N42|N42_2216	ML8|ML8_0749	UC317|UC317_0458	KF67|KF67_0393	LMG9446|LMG9446_1029	KF146|KF146_0210	KF134|KF134_1420	KF196|KF196_2144	DRA4|DRA4_1075	IL1403|IL1403_0182	CV56|CV56_0176	KLDS|KLDS_0205	LMG14418|LMG14418_2417	P7266|P7266_0783	44	1
OG_1417	competence-induced protein Ccs4	A76|A76_0202	UC509_9|UC5099_0155	FG2|FG2_0599	HP|HP_0605	LMG6897|LMG6897_0607	B40|B40_0607	SK11|SK11_0157	AM2|AM2_1667	SK110|SK110_0969	KW10|KW10_1723	KW2|KW2_0142	MG1363|MG1363_0173	NCDO763|NCDO763_0748	N41|N41_0222	V4|V4_2452	LMG8520|LMG8520_0501	IO_1|IO1_0128	LMG8526|LMG8526_1361	KF147|KF147_0152	KF282|KF282_0378	E34|E34_0255	KF201|KF201_1379	M20|M20_1470	ATCC19435|ATCC19435_0798	KF7|KF7_1917	LMG9449|LMG9449_1256	K231|K231_0003	K337|K337_0831	KF24|KF24_1025	Li1|Li1_1889	N42|N42_2217	ML8|ML8_0750	UC317|UC317_0459	KF67|KF67_0394	LMG9446|LMG9446_1030	KF146|KF146_0209	KF134|KF134_1421	KF196|KF196_2143	DRA4|DRA4_1076	IL1403|IL1403_0181	CV56|CV56_0175	KLDS|KLDS_0204	LMG14418|LMG14418_2418	P7266|P7266_0782	44	1
OG_1418	FIG00756210: hypothetical protein	A76|A76_0200	UC509_9|UC5099_0153	FG2|FG2_0597	HP|HP_0607	LMG6897|LMG6897_0609	B40|B40_0609	SK11|SK11_0155	AM2|AM2_1669	SK110|SK110_0967	KW10|KW10_1725	KW2|KW2_0140	MG1363|MG1363_0171	NCDO763|NCDO763_0750	N41|N41_0220	V4|V4_2450	LMG8520|LMG8520_0499	IO_1|IO1_0126	LMG8526|LMG8526_1363	KF147|KF147_0150	KF282|KF282_0376	E34|E34_0257	KF201|KF201_1377	M20|M20_1472	ATCC19435|ATCC19435_0800	KF7|KF7_1919	LMG9449|LMG9449_1258	K231|K231_0005	K337|K337_0833	KF24|KF24_1023	Li1|Li1_1887	N42|N42_2219	ML8|ML8_0752	UC317|UC317_0461	KF67|KF67_0396	LMG9446|LMG9446_1032	KF146|KF146_0207	KF134|KF134_1423	KF196|KF196_2141	DRA4|DRA4_1078	IL1403|IL1403_0179	CV56|CV56_0173	KLDS|KLDS_0202	LMG14418|LMG14418_2420		43	FALSE
OG_1419	transporter	A76|A76_0196	UC509_9|UC5099_0150	FG2|FG2_0593	HP|HP_0611	LMG6897|LMG6897_0613	B40|B40_0612	SK11|SK11_0152	AM2|AM2_1673	SK110|SK110_0964	KW10|KW10_1728	KW2|KW2_0137	MG1363|MG1363_0167	NCDO763|NCDO763_0754	N41|N41_0217	V4|V4_2447	LMG8520|LMG8520_0495	IO_1|IO1_0123	LMG8526|LMG8526_1366	KF147|KF147_0147	KF282|KF282_0373	E34|E34_0260	KF201|KF201_1374	M20|M20_1475	ATCC19435|ATCC19435_0803	KF7|KF7_1922	LMG9449|LMG9449_1261	K231|K231_0008	K337|K337_0836	KF24|KF24_1020	Li1|Li1_1884	N42|N42_2222	ML8|ML8_0755	UC317|UC317_0464	KF67|KF67_0399	LMG9446|LMG9446_1035	KF146|KF146_0204	KF134|KF134_1426	KF196|KF196_2138	DRA4|DRA4_1081	IL1403|IL1403_0176	CV56|CV56_0170	KLDS|KLDS_0199	LMG14418|LMG14418_2423	P7266|P7266_0777	44	1
OG_142	ABC transporter permease protein	A76|A76_1213	UC509_9|UC5099_1159	FG2|FG2_0762	HP|HP_1543	LMG6897|LMG6897_1547	B40|B40_1372	SK11|SK11_1208	AM2|AM2_2009	SK110|SK110_0295	KW10|KW10_1334	KW2|KW2_1036	MG1363|MG1363_1520	NCDO763|NCDO763_0183	N41|N41_2526	V4|V4_1873	LMG8520|LMG8520_0204	IO_1|IO1_1050	LMG8526|LMG8526_1547	KF147|KF147_1173	KF282|KF282_2068	E34|E34_0051	KF201|KF201_1508	M20|M20_2508	ATCC19435|ATCC19435_2276 ATCC19435|ATCC19435_2277	KF7|KF7_1610	LMG9449|LMG9449_1769	K231|K231_0464	K337|K337_1545	KF24|KF24_1615	Li1|Li1_0597	N42|N42_1136	ML8|ML8_0022	UC317|UC317_2213	KF67|KF67_0485	LMG9446|LMG9446_0309	KF146|KF146_1417	KF134|KF134_0185	KF196|KF196_0583	DRA4|DRA4_2592	IL1403|IL1403_1193	CV56|CV56_1150	KLDS|KLDS_1163	LMG14418|LMG14418_1524	P7266|P7266_0271	44	1
OG_1420	tRNA-guanine transglycosylase (EC 2.4.2.29)	A76|A76_0194	UC509_9|UC5099_0148	FG2|FG2_0591	HP|HP_0613	LMG6897|LMG6897_0615	B40|B40_0614	SK11|SK11_0150	AM2|AM2_1675	SK110|SK110_0962	KW10|KW10_1730	KW2|KW2_0135	MG1363|MG1363_0165	NCDO763|NCDO763_0756	N41|N41_0215	V4|V4_2445	LMG8520|LMG8520_0493	IO_1|IO1_0121	LMG8526|LMG8526_1368	KF147|KF147_0145	KF282|KF282_0371	E34|E34_0262	KF201|KF201_1372	M20|M20_1477	ATCC19435|ATCC19435_0805	KF7|KF7_1924	LMG9449|LMG9449_1263	K231|K231_0010	K337|K337_0838	KF24|KF24_1018	Li1|Li1_1882	N42|N42_2224	ML8|ML8_0757	UC317|UC317_0466	KF67|KF67_0401	LMG9446|LMG9446_1037	KF146|KF146_0202	KF134|KF134_1428	KF196|KF196_2136	DRA4|DRA4_1083	IL1403|IL1403_0174	CV56|CV56_0168	KLDS|KLDS_0197	LMG14418|LMG14418_2425	P7266|P7266_0775	44	1
OG_1421	FIG00755772: hypothetical protein	A76|A76_0181	UC509_9|UC5099_0135	FG2|FG2_0413	HP|HP_0626	LMG6897|LMG6897_0628	B40|B40_0627	SK11|SK11_0137	AM2|AM2_1677	SK110|SK110_0949	KW10|KW10_1737	KW2|KW2_0125	MG1363|MG1363_0160	NCDO763|NCDO763_0761	N41|N41_0210	V4|V4_0570	LMG8520|LMG8520_1943	IO_1|IO1_0113	LMG8526|LMG8526_1389	KF147|KF147_0125	KF282|KF282_1118	E34|E34_0269	KF201|KF201_1364	M20|M20_1480	ATCC19435|ATCC19435_0807	KF7|KF7_1948	LMG9449|LMG9449_1266	K231|K231_0012	K337|K337_0840	KF24|KF24_1004	Li1|Li1_1880	N42|N42_2228	ML8|ML8_0759	UC317|UC317_1854	KF67|KF67_1747	LMG9446|LMG9446_1046	KF146|KF146_0175	KF134|KF134_1448	KF196|KF196_1842	DRA4|DRA4_1095	IL1403|IL1403_0171	CV56|CV56_0166	KLDS|KLDS_0195	LMG14418|LMG14418_1760	P7266|P7266_0770	44	1
OG_1422	1,4-alpha-glucan (glycogen) branching enzyme,GH-13-type (EC 2.4.1.18)	A76|A76_0180	UC509_9|UC5099_0134	FG2|FG2_0412	HP|HP_0627	LMG6897|LMG6897_0629	B40|B40_0629	SK11|SK11_0136	AM2|AM2_1678	SK110|SK110_0948	KW10|KW10_1738	KW2|KW2_0124	MG1363|MG1363_0159	NCDO763|NCDO763_0762	N41|N41_0209	V4|V4_0571	LMG8520|LMG8520_1942	IO_1|IO1_0112	LMG8526|LMG8526_1390	KF147|KF147_0124	KF282|KF282_1119	E34|E34_0270	KF201|KF201_1363	M20|M20_1481	ATCC19435|ATCC19435_0808	KF7|KF7_1949	LMG9449|LMG9449_1267	K231|K231_0013	K337|K337_0841	KF24|KF24_1003	Li1|Li1_1879	N42|N42_2229	ML8|ML8_0760	UC317|UC317_1855	KF67|KF67_1748	LMG9446|LMG9446_1047	KF146|KF146_0174	KF134|KF134_1449	KF196|KF196_1843	DRA4|DRA4_1096	IL1403|IL1403_0169	CV56|CV56_0165	KLDS|KLDS_0194	LMG14418|LMG14418_1761	P7266|P7266_0769	44	1
OG_1423	Transcriptional regulator, TetR family	A76|A76_0179	UC509_9|UC5099_0133	FG2|FG2_0411	HP|HP_0628	LMG6897|LMG6897_0630	B40|B40_0630	SK11|SK11_0135	AM2|AM2_1679	SK110|SK110_0947	KW10|KW10_1739	KW2|KW2_0123	MG1363|MG1363_0158	NCDO763|NCDO763_0763	N41|N41_0208	V4|V4_0572	LMG8520|LMG8520_1941	IO_1|IO1_0111	LMG8526|LMG8526_1391	KF147|KF147_0123	KF282|KF282_1120	E34|E34_0271	KF201|KF201_1362	M20|M20_1482	ATCC19435|ATCC19435_0809	KF7|KF7_1950	LMG9449|LMG9449_1268	K231|K231_0014	K337|K337_0842	KF24|KF24_1002	Li1|Li1_1878	N42|N42_2230	ML8|ML8_0761	UC317|UC317_1856	KF67|KF67_1749	LMG9446|LMG9446_1048	KF146|KF146_0173	KF134|KF134_1450	KF196|KF196_1844	DRA4|DRA4_1097	IL1403|IL1403_0168	CV56|CV56_0164	KLDS|KLDS_0193	LMG14418|LMG14418_1762	P7266|P7266_0768	44	1
OG_1424	Ortholog of S. aureus MRSA252 (BX571856)SAR1694	A76|A76_0173	UC509_9|UC5099_0128	FG2|FG2_0406	HP|HP_0633	LMG6897|LMG6897_0635	B40|B40_0637	SK11|SK11_0130	AM2|AM2_1685	SK110|SK110_0942	KW10|KW10_1744	KW2|KW2_0117	MG1363|MG1363_0153	NCDO763|NCDO763_0768	N41|N41_0203	V4|V4_0577	LMG8520|LMG8520_1935	IO_1|IO1_0106	LMG8526|LMG8526_1396	KF147|KF147_0118	KF282|KF282_1126	E34|E34_0276	KF201|KF201_1357	M20|M20_1487	ATCC19435|ATCC19435_0814	KF7|KF7_1956	LMG9449|LMG9449_1273	K231|K231_0019	K337|K337_0847	KF24|KF24_0997	Li1|Li1_1873	N42|N42_2235	ML8|ML8_0766	UC317|UC317_1862	KF67|KF67_1754	LMG9446|LMG9446_1053	KF146|KF146_0168	KF134|KF134_1455	KF196|KF196_1849	DRA4|DRA4_1102	IL1403|IL1403_0163	CV56|CV56_0159	KLDS|KLDS_0188	LMG14418|LMG14418_1767	P7266|P7266_0764	44	1
OG_1425	Putative Holliday junction resolvase YggF	A76|A76_0172	UC509_9|UC5099_0127	FG2|FG2_0405	HP|HP_0634	LMG6897|LMG6897_0636	B40|B40_0638	SK11|SK11_0129	AM2|AM2_1686	SK110|SK110_0941	KW10|KW10_1745	KW2|KW2_0116	MG1363|MG1363_0152	NCDO763|NCDO763_0769	N41|N41_0202	V4|V4_0578	LMG8520|LMG8520_1934	IO_1|IO1_0105	LMG8526|LMG8526_1397	KF147|KF147_0117	KF282|KF282_1127	E34|E34_0277	KF201|KF201_1356	M20|M20_1488	ATCC19435|ATCC19435_0815	KF7|KF7_1957	LMG9449|LMG9449_1274	K231|K231_0020	K337|K337_0848	KF24|KF24_0996	Li1|Li1_1872	N42|N42_2236	ML8|ML8_0767	UC317|UC317_1863	KF67|KF67_1755	LMG9446|LMG9446_1054	KF146|KF146_0167	KF134|KF134_1456	KF196|KF196_1850	DRA4|DRA4_1103	IL1403|IL1403_0162	CV56|CV56_0158	KLDS|KLDS_0187	LMG14418|LMG14418_1768	P7266|P7266_0763	44	1
OG_1426	Oxidoreductase, aldo/keto reductase family	A76|A76_0167	UC509_9|UC5099_0123	FG2|FG2_1412	HP|HP_0639	LMG6897|LMG6897_0641	B40|B40_0643	SK11|SK11_0124	AM2|AM2_0344	SK110|SK110_0936	KW10|KW10_1750	KW2|KW2_0111	MG1363|MG1363_0147	NCDO763|NCDO763_0774	N41|N41_0197	V4|V4_0583	LMG8520|LMG8520_1928	IO_1|IO1_0099	LMG8526|LMG8526_1403	KF147|KF147_0115	KF282|KF282_1132	E34|E34_0279	KF201|KF201_1354	M20|M20_1490	ATCC19435|ATCC19435_0817	KF7|KF7_1959	LMG9449|LMG9449_1276	K231|K231_0022	K337|K337_0850	KF24|KF24_0994	Li1|Li1_1870	N42|N42_2241	ML8|ML8_0769	UC317|UC317_1865	KF67|KF67_1760	LMG9446|LMG9446_1056	KF146|KF146_0165	KF134|KF134_1458	KF196|KF196_1852	DRA4|DRA4_1108	IL1403|IL1403_0150	CV56|CV56_0156	KLDS|KLDS_0181	LMG14418|LMG14418_0413	P7266|P7266_0761	44	1
OG_1427	LSU ribosomal protein L34p	A76|A76_0166	UC509_9|UC5099_0122	FG2|FG2_1413	HP|HP_0640	LMG6897|LMG6897_0642	B40|B40_0644	SK11|SK11_0123	AM2|AM2_0346	SK110|SK110_0935	KW10|KW10_1751	KW2|KW2_0110	MG1363|MG1363_0146	NCDO763|NCDO763_0775	N41|N41_0196	V4|V4_0584	LMG8520|LMG8520_1927	IO_1|IO1_0098	LMG8526|LMG8526_1404	KF147|KF147_0114	KF282|KF282_1133	E34|E34_0280	KF201|KF201_1353	M20|M20_1491	ATCC19435|ATCC19435_0818	KF7|KF7_1960	LMG9449|LMG9449_1277	K231|K231_0023	K337|K337_0851	KF24|KF24_0993	Li1|Li1_1869	N42|N42_2242	ML8|ML8_0770	UC317|UC317_1866	KF67|KF67_1761	LMG9446|LMG9446_1057	KF146|KF146_0164	KF134|KF134_1459	KF196|KF196_1853	DRA4|DRA4_1109	IL1403|IL1403_0148	CV56|CV56_0155	KLDS|KLDS_0180	LMG14418|LMG14418_0414	P7266|P7266_0760	44	1
OG_1428	RNA-binding protein Jag	A76|A76_0165	UC509_9|UC5099_0121	FG2|FG2_1414	HP|HP_0641	LMG6897|LMG6897_0643	B40|B40_0645	SK11|SK11_0122	AM2|AM2_0347	SK110|SK110_0934	KW10|KW10_1752	KW2|KW2_0109	MG1363|MG1363_0145	NCDO763|NCDO763_0776	N41|N41_0195	V4|V4_0585	LMG8520|LMG8520_1926	IO_1|IO1_0097	LMG8526|LMG8526_1405	KF147|KF147_0113	KF282|KF282_1134	E34|E34_0281	KF201|KF201_1352	M20|M20_1492	ATCC19435|ATCC19435_0819	KF7|KF7_1961	LMG9449|LMG9449_1278	K231|K231_0024	K337|K337_0852	KF24|KF24_0992	Li1|Li1_1868	N42|N42_2243	ML8|ML8_0771	UC317|UC317_1867	KF67|KF67_1762	LMG9446|LMG9446_1058	KF146|KF146_0163	KF134|KF134_1460	KF196|KF196_1854	DRA4|DRA4_1110	IL1403|IL1403_0147	CV56|CV56_0154	KLDS|KLDS_0179	LMG14418|LMG14418_0415	P7266|P7266_0759	44	1
OG_1429	Inner membrane protein translocase componentYidC, short form OxaI-like	A76|A76_0164	UC509_9|UC5099_0120	FG2|FG2_1415	HP|HP_0642	LMG6897|LMG6897_0644	B40|B40_0646	SK11|SK11_0121	AM2|AM2_0348	SK110|SK110_0933	KW10|KW10_1753	KW2|KW2_0108	MG1363|MG1363_0144	NCDO763|NCDO763_0777	N41|N41_0194	V4|V4_0586	LMG8520|LMG8520_1925	IO_1|IO1_0096	LMG8526|LMG8526_1406	KF147|KF147_0112	KF282|KF282_1135	E34|E34_0282	KF201|KF201_1351	M20|M20_1493	ATCC19435|ATCC19435_0820	KF7|KF7_1962	LMG9449|LMG9449_1279	K231|K231_0025	K337|K337_0853	KF24|KF24_0991	Li1|Li1_1867	N42|N42_2244	ML8|ML8_0772	UC317|UC317_1868	KF67|KF67_1763	LMG9446|LMG9446_1059	KF146|KF146_0162	KF134|KF134_1461	KF196|KF196_1855	DRA4|DRA4_1111	IL1403|IL1403_0146	CV56|CV56_0153	KLDS|KLDS_0178	LMG14418|LMG14418_0416	P7266|P7266_0758	44	1
OG_143	Alpha-acetolactate decarboxylase (EC 4.1.1.5)	A76|A76_1216	UC509_9|UC5099_1162 UC509_9|UC5099_2537	FG2|FG2_0655	HP|HP_2235	LMG6897|LMG6897_0207	B40|B40_2256	SK11|SK11_1211	AM2|AM2_2005	SK110|SK110_0738	KW10|KW10_1310	KW2|KW2_1039	MG1363|MG1363_1517	NCDO763|NCDO763_0180	N41|N41_2529	V4|V4_1870	LMG8520|LMG8520_0208	IO_1|IO1_1053	LMG8526|LMG8526_1550	KF147|KF147_1176	KF282|KF282_2065	E34|E34_0054	KF201|KF201_1505	M20|M20_2511	ATCC19435|ATCC19435_2273	KF7|KF7_1613	LMG9449|LMG9449_1766	K231|K231_0461	K337|K337_1542	KF24|KF24_1618	Li1|Li1_0600	N42|N42_1139	ML8|ML8_0720	UC317|UC317_2210	KF67|KF67_0482	LMG9446|LMG9446_0312	KF146|KF146_1420	KF134|KF134_0182	KF196|KF196_0586	DRA4|DRA4_2595	IL1403|IL1403_1196	CV56|CV56_1153	KLDS|KLDS_1166	LMG14418|LMG14418_1527	P7266|P7266_0275	44	1
OG_1430	Ribonuclease P protein component (EC 3.1.26.5)	A76|A76_0163	UC509_9|UC5099_0119	FG2|FG2_1416	HP|HP_0643	LMG6897|LMG6897_0645	B40|B40_0647	SK11|SK11_0120	AM2|AM2_0349	SK110|SK110_0932	KW10|KW10_1754	KW2|KW2_0107	MG1363|MG1363_0143	NCDO763|NCDO763_0778	N41|N41_0193	V4|V4_0587	LMG8520|LMG8520_1924	IO_1|IO1_0095	LMG8526|LMG8526_1407	KF147|KF147_0111	KF282|KF282_1136	E34|E34_0283	KF201|KF201_1350	M20|M20_1494	ATCC19435|ATCC19435_0821	KF7|KF7_1963	LMG9449|LMG9449_1280	K231|K231_0026	K337|K337_0854	KF24|KF24_0990	Li1|Li1_1866	N42|N42_2245	ML8|ML8_0773	UC317|UC317_1869	KF67|KF67_1764	LMG9446|LMG9446_1060	KF146|KF146_0161	KF134|KF134_1462	KF196|KF196_1856	DRA4|DRA4_1112	IL1403|IL1403_0145	CV56|CV56_0152	KLDS|KLDS_0177	LMG14418|LMG14418_0417	P7266|P7266_0757	44	1
OG_1431	Transcriptional regulator, TetR family	A76|A76_0162	UC509_9|UC5099_0118	FG2|FG2_1417	HP|HP_0644	LMG6897|LMG6897_0646	B40|B40_0648	SK11|SK11_0119	AM2|AM2_0350	SK110|SK110_0931	KW10|KW10_1755	KW2|KW2_0106	MG1363|MG1363_0142	NCDO763|NCDO763_0779	N41|N41_0192	V4|V4_0588	LMG8520|LMG8520_1923	IO_1|IO1_0094	LMG8526|LMG8526_1408	KF147|KF147_0110	KF282|KF282_1137	E34|E34_0284	KF201|KF201_1349	M20|M20_1495	ATCC19435|ATCC19435_0822	KF7|KF7_1964	LMG9449|LMG9449_1281	K231|K231_0027	K337|K337_0855	KF24|KF24_0989	Li1|Li1_1865	N42|N42_2246	ML8|ML8_0774	UC317|UC317_1870	KF67|KF67_1765	LMG9446|LMG9446_1061	KF146|KF146_0160	KF134|KF134_1463	KF196|KF196_1857	DRA4|DRA4_1113	IL1403|IL1403_0144	CV56|CV56_0151	KLDS|KLDS_0176	LMG14418|LMG14418_0418	P7266|P7266_0756	44	1
OG_1432	Multidrug-efflux transporter, major facilitatorsuperfamily (MFS) (TC 2.A.1)	A76|A76_0161	UC509_9|UC5099_0117	FG2|FG2_1418	HP|HP_0645	LMG6897|LMG6897_0647	B40|B40_0649	SK11|SK11_0118	AM2|AM2_0351	SK110|SK110_0930	KW10|KW10_1756	KW2|KW2_0105	MG1363|MG1363_0141	NCDO763|NCDO763_0780	N41|N41_0191	V4|V4_0589	LMG8520|LMG8520_1922	IO_1|IO1_0093	LMG8526|LMG8526_1409	KF147|KF147_0109	KF282|KF282_1138	E34|E34_0285	KF201|KF201_1348	M20|M20_1496	ATCC19435|ATCC19435_0823	KF7|KF7_1965	LMG9449|LMG9449_1282	K231|K231_0028	K337|K337_0856	KF24|KF24_0988	Li1|Li1_1864	N42|N42_2247	ML8|ML8_0775	UC317|UC317_1871	KF67|KF67_1766	LMG9446|LMG9446_1062	KF146|KF146_0159	KF134|KF134_1464	KF196|KF196_1858	DRA4|DRA4_1114	IL1403|IL1403_0143	CV56|CV56_0150	KLDS|KLDS_0175	LMG14418|LMG14418_0419	P7266|P7266_0755	44	1
OG_1433	Argininosuccinate lyase (EC 4.3.2.1)	A76|A76_0160	UC509_9|UC5099_0116	FG2|FG2_1419	HP|HP_0646	LMG6897|LMG6897_0648	B40|B40_0650	SK11|SK11_0117	AM2|AM2_0352	SK110|SK110_0929	KW10|KW10_1757	KW2|KW2_0104	MG1363|MG1363_0140	NCDO763|NCDO763_0781	N41|N41_0190	V4|V4_0590	LMG8520|LMG8520_1921	IO_1|IO1_0092	LMG8526|LMG8526_1410	KF147|KF147_0108	KF282|KF282_1139	E34|E34_0286	KF201|KF201_1347	M20|M20_1497	ATCC19435|ATCC19435_0824	KF7|KF7_1966	LMG9449|LMG9449_1283	K231|K231_0029	K337|K337_0857	KF24|KF24_0987	Li1|Li1_1863	N42|N42_2248	ML8|ML8_0776	UC317|UC317_1872	KF67|KF67_1767	LMG9446|LMG9446_1063	KF146|KF146_0158	KF134|KF134_1465	KF196|KF196_1859	DRA4|DRA4_1115	IL1403|IL1403_0142	CV56|CV56_0149	KLDS|KLDS_0174	LMG14418|LMG14418_0420	P7266|P7266_0754	44	1
OG_1434	Argininosuccinate synthase (EC 6.3.4.5)	A76|A76_0159	UC509_9|UC5099_0115	FG2|FG2_1420	HP|HP_0647	LMG6897|LMG6897_0649	B40|B40_0651	SK11|SK11_0116	AM2|AM2_0353	SK110|SK110_0928	KW10|KW10_1758	KW2|KW2_0103	MG1363|MG1363_0139	NCDO763|NCDO763_0782	N41|N41_0189	V4|V4_0591	LMG8520|LMG8520_1920	IO_1|IO1_0091	LMG8526|LMG8526_1411	KF147|KF147_0107	KF282|KF282_1140	E34|E34_0287	KF201|KF201_1346	M20|M20_1498	ATCC19435|ATCC19435_0825	KF7|KF7_1967	LMG9449|LMG9449_1284	K231|K231_0030	K337|K337_0858	KF24|KF24_0986	Li1|Li1_1862	N42|N42_2249	ML8|ML8_0777	UC317|UC317_1873	KF67|KF67_1768	LMG9446|LMG9446_1064	KF146|KF146_0157	KF134|KF134_1466	KF196|KF196_1860	DRA4|DRA4_1116	IL1403|IL1403_0141	CV56|CV56_0148	KLDS|KLDS_0173	LMG14418|LMG14418_0421	P7266|P7266_0753	44	1
OG_1435	Polysaccharide deacetylase	A76|A76_0134	UC509_9|UC5099_0086	FG2|FG2_0559	HP|HP_1781	LMG6897|LMG6897_1042	B40|B40_1611	SK11|SK11_0083	AM2|AM2_0386	SK110|SK110_0034	KW10|KW10_0970	KW2|KW2_0078	MG1363|MG1363_0111	NCDO763|NCDO763_1929	N41|N41_1242	V4|V4_0744	LMG8520|LMG8520_1898	IO_1|IO1_0069	LMG8526|LMG8526_1433	KF147|KF147_0073	KF282|KF282_1162	E34|E34_0308	KF201|KF201_1327	M20|M20_1517	ATCC19435|ATCC19435_0846	KF7|KF7_1986	LMG9449|LMG9449_1931	K231|K231_0051	K337|K337_0878	KF24|KF24_0965	Li1|Li1_1841	N42|N42_2623	ML8|ML8_0796	UC317|UC317_1581	KF67|KF67_1787	LMG9446|LMG9446_1083	KF146|KF146_0069	KF134|KF134_1486	KF196|KF196_1879	DRA4|DRA4_0229	IL1403|IL1403_0122	CV56|CV56_0129	KLDS|KLDS_0117	LMG14418|LMG14418_0912		43	FALSE
OG_1436	LSU ribosomal protein L33p @ LSU ribosomalprotein L33p, zinc-independent	A76|A76_0119		FG2|FG2_0574	HP|HP_1796	LMG6897|LMG6897_1057	B40|B40_1626	SK11|SK11_0068	AM2|AM2_0398	SK110|SK110_0049	KW10|KW10_0984	KW2|KW2_0064	MG1363|MG1363_0097	NCDO763|NCDO763_1915	N41|N41_1256	V4|V4_0758	LMG8520|LMG8520_1887	IO_1|IO1_0057	LMG8526|LMG8526_1445	KF147|KF147_0061	KF282|KF282_1174	E34|E34_0320	KF201|KF201_1315	M20|M20_1529	ATCC19435|ATCC19435_0858	KF7|KF7_1998	LMG9449|LMG9449_1920	K231|K231_0063	K337|K337_0890	KF24|KF24_0953	Li1|Li1_1829	N42|N42_2635	ML8|ML8_0808	UC317|UC317_1569	KF67|KF67_1799	LMG9446|LMG9446_1095	KF146|KF146_0057	KF134|KF134_1498	KF196|KF196_1891	DRA4|DRA4_0244	IL1403|IL1403_0110	CV56|CV56_0117	KLDS|KLDS_0105	LMG14418|LMG14418_0900	P7266|P7266_1814	43	FALSE
OG_1437	Nitrilotriacetate monooxygenase component B (EC1.14.13.-)	A76|A76_0073		FG2|FG2_0537	HP|HP_1797	LMG6897|LMG6897_1058	B40|B40_1627	SK11|SK11_0067	AM2|AM2_1257	SK110|SK110_0050	KW10|KW10_0985	KW2|KW2_0063	MG1363|MG1363_0096	NCDO763|NCDO763_1914	N41|N41_0631	V4|V4_0759	LMG8520|LMG8520_1886	IO_1|IO1_0056	LMG8526|LMG8526_1446	KF147|KF147_0060	KF282|KF282_1183	E34|E34_0324	KF201|KF201_1314	M20|M20_1530	ATCC19435|ATCC19435_1310	KF7|KF7_2001	LMG9449|LMG9449_1903	K231|K231_0067	K337|K337_0891	KF24|KF24_2174	Li1|Li1_1825	N42|N42_2639	ML8|ML8_0811	UC317|UC317_1566	KF67|KF67_0805	LMG9446|LMG9446_1098	KF146|KF146_0054	KF134|KF134_1512	KF196|KF196_1894	DRA4|DRA4_0245	IL1403|IL1403_0088	CV56|CV56_0114	KLDS|KLDS_0057	LMG14418|LMG14418_0191	P7266|P7266_1817	43	FALSE
OG_1438	Glyoxalase family protein	A76|A76_0072		FG2|FG2_0538	HP|HP_1798	LMG6897|LMG6897_1059	B40|B40_1628	SK11|SK11_0066	AM2|AM2_1256	SK110|SK110_0051	KW10|KW10_0986	KW2|KW2_0062	MG1363|MG1363_0095	NCDO763|NCDO763_1913	N41|N41_0632	V4|V4_0760	LMG8520|LMG8520_1885	IO_1|IO1_0055	LMG8526|LMG8526_1447	KF147|KF147_0059	KF282|KF282_1184	E34|E34_0325	KF201|KF201_1313	M20|M20_1531	ATCC19435|ATCC19435_1309	KF7|KF7_2002	LMG9449|LMG9449_1902	K231|K231_0068	K337|K337_0892	KF24|KF24_2175	Li1|Li1_1824	N42|N42_2640	ML8|ML8_0812	UC317|UC317_1565	KF67|KF67_0804	LMG9446|LMG9446_1099	KF146|KF146_0053	KF134|KF134_1513	KF196|KF196_1895	DRA4|DRA4_0246	IL1403|IL1403_0087	CV56|CV56_0113	KLDS|KLDS_0056	LMG14418|LMG14418_0192	P7266|P7266_1818	43	FALSE
OG_1439	Carboxylesterase (EC 3.1.1.1)	A76|A76_0071		FG2|FG2_0539	HP|HP_1799	LMG6897|LMG6897_1060	B40|B40_1629	SK11|SK11_0065	AM2|AM2_1255	SK110|SK110_0052	KW10|KW10_0987	KW2|KW2_0061	MG1363|MG1363_0094	NCDO763|NCDO763_1912	N41|N41_0633	V4|V4_0761	LMG8520|LMG8520_1884	IO_1|IO1_0054	LMG8526|LMG8526_1448	KF147|KF147_0058	KF282|KF282_1185	E34|E34_0326	KF201|KF201_1312	M20|M20_1532	ATCC19435|ATCC19435_1308	KF7|KF7_2003	LMG9449|LMG9449_1901	K231|K231_0069	K337|K337_0893	KF24|KF24_2176	Li1|Li1_1823	N42|N42_2641	ML8|ML8_0813	UC317|UC317_1564	KF67|KF67_0803	LMG9446|LMG9446_1100	KF146|KF146_0052	KF134|KF134_1514	KF196|KF196_1896	DRA4|DRA4_0247	IL1403|IL1403_0086	CV56|CV56_0112	KLDS|KLDS_0055	LMG14418|LMG14418_0193	P7266|P7266_1819	43	FALSE
OG_144	Phage replication protein	A76|A76_2288 A76|A76_2566		FG2|FG2_1907	HP|HP_0097	LMG6897|LMG6897_0097	B40|B40_0387	SK11|SK11_2284	AM2|AM2_1496	SK110|SK110_0174			MG1363|MG1363_0029 MG1363|MG1363_2329 MG1363|MG1363_2615	NCDO763|NCDO763_1663	N41|N41_0327	V4|V4_1184	LMG8520|LMG8520_2270			KF147|KF147_2523	KF282|KF282_1742				ATCC19435|ATCC19435_1181					KF24|KF24_1882		N42|N42_0486 N42|N42_1223	ML8|ML8_1001 ML8|ML8_2435	UC317|UC317_1278 UC317|UC317_1603	KF67|KF67_1417	LMG9446|LMG9446_1147	KF146|KF146_2436	KF134|KF134_2291	KF196|KF196_1074	DRA4|DRA4_0174	IL1403|IL1403_0035	CV56|CV56_0064 CV56|CV56_2362	KLDS|KLDS_2266 KLDS|KLDS_2548 KLDS|KLDS_2618	LMG14418|LMG14418_0545 LMG14418|LMG14418_2393		30	FALSE
OG_1440	short-chain type dehydrogenase	A76|A76_0067	UC509_9|UC5099_0054		HP|HP_1147	LMG6897|LMG6897_1114	B40|B40_1556	SK11|SK11_0061	AM2|AM2_1252	SK110|SK110_1928	KW10|KW10_0990	KW2|KW2_0058	MG1363|MG1363_0091	NCDO763|NCDO763_1909	N41|N41_0636	V4|V4_0764	LMG8520|LMG8520_1881	IO_1|IO1_0051	LMG8526|LMG8526_1451	KF147|KF147_0055	KF282|KF282_1188	E34|E34_0329	KF201|KF201_1309	M20|M20_1535	ATCC19435|ATCC19435_1304	KF7|KF7_2006	LMG9449|LMG9449_1898	K231|K231_0072	K337|K337_0896	KF24|KF24_2179	Li1|Li1_1820	N42|N42_2644	ML8|ML8_0816	UC317|UC317_1561	KF67|KF67_0800	LMG9446|LMG9446_1103	KF146|KF146_0049	KF134|KF134_1517	KF196|KF196_1899	DRA4|DRA4_1547	IL1403|IL1403_0083	CV56|CV56_0109	KLDS|KLDS_0052	LMG14418|LMG14418_0196	P7266|P7266_1824	43	FALSE
OG_1441	O-acetylhomoserine sulfhydrylase (EC 2.5.1.49)/ O-succinylhomoserine sulfhydrylase (EC 2.5.1.48)	A76|A76_0066	UC509_9|UC5099_0053		HP|HP_1148	LMG6897|LMG6897_1113	B40|B40_1555	SK11|SK11_0060	AM2|AM2_1251	SK110|SK110_1927	KW10|KW10_0991	KW2|KW2_0057	MG1363|MG1363_0090	NCDO763|NCDO763_1908	N41|N41_0637	V4|V4_0765	LMG8520|LMG8520_1880	IO_1|IO1_0050	LMG8526|LMG8526_1452	KF147|KF147_0054	KF282|KF282_1189	E34|E34_0330	KF201|KF201_1308	M20|M20_1536	ATCC19435|ATCC19435_1303	KF7|KF7_2007	LMG9449|LMG9449_1896 LMG9449|LMG9449_1897	K231|K231_0073	K337|K337_0897	KF24|KF24_2180	Li1|Li1_1819	N42|N42_2645	ML8|ML8_0817	UC317|UC317_1560	KF67|KF67_0799	LMG9446|LMG9446_1104	KF146|KF146_0048	KF134|KF134_1518	KF196|KF196_1900	DRA4|DRA4_1546	IL1403|IL1403_0082	CV56|CV56_0108	KLDS|KLDS_0051	LMG14418|LMG14418_0197		42	FALSE
OG_1442	Glycerol-3-phosphate dehydrogenase (EC1.1.5.3)	A76|A76_1501	UC509_9|UC5099_1449	FG2|FG2_2663	HP|HP_2041	LMG6897|LMG6897_0343	B40|B40_2281	SK11|SK11_1507	AM2|AM2_1787	SK110|SK110_0759	KW10|KW10_2206	KW2|KW2_1340	MG1363|MG1363_1141	NCDO763|NCDO763_2418	N41|N41_0491	V4|V4_0860		IO_1|IO1_1237	LMG8526|LMG8526_1670	KF147|KF147_1356	KF282|KF282_0761 KF282|KF282_2592	E34|E34_0647	KF201|KF201_0843	M20|M20_1557	ATCC19435|ATCC19435_0167	KF7|KF7_0337	LMG9449|LMG9449_2052	K231|K231_0814	K337|K337_1906	KF24|KF24_1455	Li1|Li1_1072	N42|N42_1413	ML8|ML8_1384		KF67|KF67_1887	LMG9446|LMG9446_0814	KF146|KF146_0598	KF134|KF134_1712	KF196|KF196_0791	DRA4|DRA4_0804	IL1403|IL1403_1357	CV56|CV56_1292	KLDS|KLDS_1379	LMG14418|LMG14418_1787	P7266|P7266_0875	42	FALSE
OG_1443	Integral membrane protein	A76|A76_1682	UC509_9|UC5099_0938	FG2|FG2_2367	HP|HP_1587	LMG6897|LMG6897_1933	B40|B40_0180	SK11|SK11_0925	AM2|AM2_1482	SK110|SK110_2469	KW10|KW10_0693	KW2|KW2_0815	MG1363|MG1363_1745	NCDO763|NCDO763_0465	N41|N41_1215	V4|V4_1265	LMG8520|LMG8520_1271 LMG8520|LMG8520_1272	IO_1|IO1_0833	LMG8526|LMG8526_1044	KF147|KF147_0911	KF282|KF282_2274	E34|E34_1781	KF201|KF201_1700	M20|M20_1590	ATCC19435|ATCC19435_1324	KF7|KF7_1421	LMG9449|LMG9449_0396	K231|K231_1713	K337|K337_0121	KF24|KF24_1311	Li1|Li1_0411	N42|N42_0943	ML8|ML8_2475	UC317|UC317_1141	KF67|KF67_1721	LMG9446|LMG9446_1201	KF146|KF146_1232	KF134|KF134_1842	KF196|KF196_0403	DRA4|DRA4_2481	IL1403|IL1403_0929	CV56|CV56_0883	KLDS|KLDS_0897	LMG14418|LMG14418_2249		43	FALSE
OG_1444	FIG00755036: hypothetical protein	A76|A76_1680	UC509_9|UC5099_0942	FG2|FG2_2369	HP|HP_1589	LMG6897|LMG6897_1935	B40|B40_1076	SK11|SK11_0927	AM2|AM2_1480	SK110|SK110_2471	KW10|KW10_0691	KW2|KW2_0817	MG1363|MG1363_1743	NCDO763|NCDO763_0467	N41|N41_1217	V4|V4_1267	LMG8520|LMG8520_1274	IO_1|IO1_0835	LMG8526|LMG8526_1042	KF147|KF147_0913	KF282|KF282_2272	E34|E34_1783	KF201|KF201_1698	M20|M20_1592	ATCC19435|ATCC19435_1326	KF7|KF7_1423	LMG9449|LMG9449_0398	K231|K231_1715	K337|K337_0123	KF24|KF24_1313	Li1|Li1_0413	N42|N42_0945	ML8|ML8_2477	UC317|UC317_1143	KF67|KF67_1723	LMG9446|LMG9446_1199	KF146|KF146_1234	KF134|KF134_1844	KF196|KF196_0405	DRA4|DRA4_2483	IL1403|IL1403_0931	CV56|CV56_0885	KLDS|KLDS_0899	LMG14418|LMG14418_2251	P7266|P7266_0575	44	1
OG_1445	Cell division protein FtsI [Peptidoglycansynthetase] (EC 2.4.1.129)	A76|A76_1677	UC509_9|UC5099_0945	FG2|FG2_2372	HP|HP_1592	LMG6897|LMG6897_1938	B40|B40_1079	SK11|SK11_0930	AM2|AM2_1477	SK110|SK110_2474	KW10|KW10_0688	KW2|KW2_0820	MG1363|MG1363_1740	NCDO763|NCDO763_0470	N41|N41_1220	V4|V4_1270	LMG8520|LMG8520_1707	IO_1|IO1_0838	LMG8526|LMG8526_1039	KF147|KF147_0916	KF282|KF282_2269	E34|E34_1786	KF201|KF201_1695	M20|M20_1595	ATCC19435|ATCC19435_1329	KF7|KF7_1426	LMG9449|LMG9449_2479	K231|K231_1718	K337|K337_0126	KF24|KF24_1316	Li1|Li1_0416	N42|N42_0948	ML8|ML8_2480	UC317|UC317_1146	KF67|KF67_1726	LMG9446|LMG9446_0134	KF146|KF146_1237	KF134|KF134_1847	KF196|KF196_0408	DRA4|DRA4_2486	IL1403|IL1403_0934	CV56|CV56_0888	KLDS|KLDS_0902	LMG14418|LMG14418_2254	P7266|P7266_0572	44	1
OG_1446	Phospho-N-acetylmuramoyl-pentapeptide-transferase (EC 2.7.8.13)	A76|A76_1676	UC509_9|UC5099_0947	FG2|FG2_2373	HP|HP_1593	LMG6897|LMG6897_1939	B40|B40_1080	SK11|SK11_0931	AM2|AM2_1476	SK110|SK110_2475	KW10|KW10_0687	KW2|KW2_0821	MG1363|MG1363_1739	NCDO763|NCDO763_0471	N41|N41_1221	V4|V4_1271	LMG8520|LMG8520_1706	IO_1|IO1_0839	LMG8526|LMG8526_1038	KF147|KF147_0917	KF282|KF282_2268	E34|E34_1787	KF201|KF201_1694	M20|M20_1596	ATCC19435|ATCC19435_1330	KF7|KF7_1427	LMG9449|LMG9449_2480	K231|K231_1719	K337|K337_0127	KF24|KF24_1317	Li1|Li1_0417	N42|N42_0949	ML8|ML8_2481	UC317|UC317_1147	KF67|KF67_1727	LMG9446|LMG9446_0135	KF146|KF146_1238	KF134|KF134_1848	KF196|KF196_0409	DRA4|DRA4_2487	IL1403|IL1403_0935	CV56|CV56_0889	KLDS|KLDS_0903	LMG14418|LMG14418_2255	P7266|P7266_0571	44	1
OG_1447	Malolactic regulator	A76|A76_1671	UC509_9|UC5099_0952	FG2|FG2_2378	HP|HP_1598	LMG6897|LMG6897_1944	B40|B40_1084	SK11|SK11_0935	AM2|AM2_1471	SK110|SK110_2479	KW10|KW10_0683	KW2|KW2_0826	MG1363|MG1363_1735	NCDO763|NCDO763_0475	N41|N41_1825	V4|V4_1275	LMG8520|LMG8520_1701	IO_1|IO1_0843	LMG8526|LMG8526_1033	KF147|KF147_0922	KF282|KF282_2263	E34|E34_1791	KF201|KF201_1690	M20|M20_1600	ATCC19435|ATCC19435_1335	KF7|KF7_1432	LMG9449|LMG9449_2485	K231|K231_1724	K337|K337_0131	KF24|KF24_1321	Li1|Li1_0421	N42|N42_0954	ML8|ML8_2486	UC317|UC317_1153	KF67|KF67_1731	LMG9446|LMG9446_0139	KF146|KF146_1242	KF134|KF134_1852	KF196|KF196_0413	DRA4|DRA4_2491	IL1403|IL1403_0940	CV56|CV56_0895	KLDS|KLDS_0908	LMG14418|LMG14418_2259	P7266|P7266_1105	44	1
OG_1448	FIG00755689: hypothetical protein	A76|A76_0983	UC509_9|UC5099_1566	FG2|FG2_1071	HP|HP_1864	LMG6897|LMG6897_1345	B40|B40_2604	SK11|SK11_1649	AM2|AM2_2080	SK110|SK110_2426	KW10|KW10_2057	KW2|KW2_1489	MG1363|MG1363_1001	NCDO763|NCDO763_1810	N41|N41_2473	V4|V4_0346	LMG8520|LMG8520_2564	IO_1|IO1_1527	LMG8526|LMG8526_1266	KF147|KF147_1707	KF282|KF282_1831	E34|E34_0529	KF201|KF201_1958	M20|M20_1664	ATCC19435|ATCC19435_1969	KF7|KF7_0583	LMG9449|LMG9449_2300	K231|K231_1898		KF24|KF24_1759	Li1|Li1_1725	N42|N42_0819	ML8|ML8_1461	UC317|UC317_1297	KF67|KF67_0992	LMG9446|LMG9446_1627	KF146|KF146_0752	KF134|KF134_0010	KF196|KF196_1117	DRA4|DRA4_2390	IL1403|IL1403_1658	CV56|CV56_1534	KLDS|KLDS_1651	LMG14418|LMG14418_1358	P7266|P7266_1141	43	FALSE
OG_1449	Phosphoribosylformylglycinamidine synthase,synthetase subunit (EC 6.3.5.3)	A76|A76_0988	UC509_9|UC5099_1561	FG2|FG2_1066	HP|HP_1859	LMG6897|LMG6897_1350	B40|B40_2599	SK11|SK11_1644	AM2|AM2_2085	SK110|SK110_2431	KW10|KW10_2051	KW2|KW2_1484	MG1363|MG1363_1007	NCDO763|NCDO763_1815	N41|N41_2478	V4|V4_0341	LMG8520|LMG8520_2569	IO_1|IO1_1522	LMG8526|LMG8526_1261	KF147|KF147_1702	KF282|KF282_1836	E34|E34_0524	KF201|KF201_1963	M20|M20_1669	ATCC19435|ATCC19435_1964	KF7|KF7_0578	LMG9449|LMG9449_2295	K231|K231_1903	K337|K337_1938	KF24|KF24_1764	Li1|Li1_1720	N42|N42_0814	ML8|ML8_1466	UC317|UC317_1302	KF67|KF67_0997	LMG9446|LMG9446_1622	KF146|KF146_0757	KF134|KF134_0015	KF196|KF196_1122	DRA4|DRA4_2395	IL1403|IL1403_1653	CV56|CV56_1529	KLDS|KLDS_1646	LMG14418|LMG14418_1353	P7266|P7266_1150	44	1
OG_145	prophage ps2 protein 21	A76|A76_2572		FG2|FG2_1902	HP|HP_0093	LMG6897|LMG6897_0093			AM2|AM2_0303 AM2|AM2_0656 AM2|AM2_0334				MG1363|MG1363_2620 MG1363|MG1363_0025	NCDO763|NCDO763_1693 NCDO763|NCDO763_0566	N41|N41_1103 N41|N41_0115	V4|V4_1179		IO_1|IO1_1882			KF282|KF282_1738 KF282|KF282_1240				ATCC19435|ATCC19435_0393	KF7|KF7_1293 KF7|KF7_1050		K231|K231_0256		KF24|KF24_0207 KF24|KF24_1877	Li1|Li1_0225	N42|N42_0491 N42|N42_0383	ML8|ML8_2105	UC317|UC317_1273 UC317|UC317_0780	KF67|KF67_1413 KF67|KF67_1548	LMG9446|LMG9446_1151	KF146|KF146_1038 KF146|KF146_1126	KF134|KF134_2286	KF196|KF196_1070 KF196|KF196_1271		IL1403|IL1403_0030	CV56|CV56_0059 CV56|CV56_2367	KLDS|KLDS_0566 KLDS|KLDS_2552 KLDS|KLDS_2264 KLDS|KLDS_2624	LMG14418|LMG14418_2070		28	FALSE
OG_1450	FIG00755469: hypothetical protein	A76|A76_0997	UC509_9|UC5099_1550	FG2|FG2_0733	HP|HP_1103	LMG6897|LMG6897_1634	B40|B40_0933	SK11|SK11_1635	AM2|AM2_2093	SK110|SK110_2441	KW10|KW10_2037	KW2|KW2_1468	MG1363|MG1363_1022	NCDO763|NCDO763_2470	N41|N41_0582	V4|V4_0334	LMG8520|LMG8520_2580	IO_1|IO1_1507	LMG8526|LMG8526_1254	KF147|KF147_1692	KF282|KF282_1844	E34|E34_0508	KF201|KF201_1971	M20|M20_1677	ATCC19435|ATCC19435_1954	KF7|KF7_0570	LMG9449|LMG9449_2286	K231|K231_1912	K337|K337_1946	KF24|KF24_1773	Li1|Li1_1711	N42|N42_0805	ML8|ML8_1475	UC317|UC317_1311	KF67|KF67_1005	LMG9446|LMG9446_1614	KF146|KF146_0765	KF134|KF134_0023	KF196|KF196_1130	DRA4|DRA4_2405	IL1403|IL1403_1645	CV56|CV56_1520	KLDS|KLDS_1637	LMG14418|LMG14418_1343		43	FALSE
OG_1451	Transcriptional regulator, TetR family	A76|A76_0998	UC509_9|UC5099_1549	FG2|FG2_0731	HP|HP_1101	LMG6897|LMG6897_1632	B40|B40_0930	SK11|SK11_1634	AM2|AM2_2094	SK110|SK110_2442	KW10|KW10_2036	KW2|KW2_1467	MG1363|MG1363_1025	NCDO763|NCDO763_2298	N41|N41_0583	V4|V4_0333	LMG8520|LMG8520_2610	IO_1|IO1_1506	LMG8526|LMG8526_1253	KF147|KF147_1691	KF282|KF282_1845	E34|E34_0507	KF201|KF201_1972	M20|M20_1678	ATCC19435|ATCC19435_1953	KF7|KF7_0569	LMG9449|LMG9449_2285	K231|K231_1913	K337|K337_1947	KF24|KF24_1774	Li1|Li1_1710	N42|N42_0804	ML8|ML8_1476	UC317|UC317_1312	KF67|KF67_1006	LMG9446|LMG9446_1613	KF146|KF146_0766	KF134|KF134_0024	KF196|KF196_1131	DRA4|DRA4_2406	IL1403|IL1403_1644	CV56|CV56_1517	KLDS|KLDS_1636	LMG14418|LMG14418_1342		43	FALSE
OG_1452	NADPH-dependent methylglyoxal reductase(D-lactaldehyde dehydrogenase)	A76|A76_1000	UC509_9|UC5099_1547	FG2|FG2_0728	HP|HP_1098	LMG6897|LMG6897_1629	B40|B40_0927	SK11|SK11_1632	AM2|AM2_2095	SK110|SK110_2444	KW10|KW10_2035	KW2|KW2_1466	MG1363|MG1363_1026	NCDO763|NCDO763_2299	N41|N41_0584	V4|V4_0332	LMG8520|LMG8520_2611	IO_1|IO1_1505	LMG8526|LMG8526_1252	KF147|KF147_1690	KF282|KF282_1846	E34|E34_0506	KF201|KF201_1973	M20|M20_1679	ATCC19435|ATCC19435_1952	KF7|KF7_0568	LMG9449|LMG9449_2283	K231|K231_1914	K337|K337_1948	KF24|KF24_1775	Li1|Li1_1709	N42|N42_0803	ML8|ML8_1477	UC317|UC317_1313	KF67|KF67_1007	LMG9446|LMG9446_1612	KF146|KF146_0767	KF134|KF134_0025	KF196|KF196_1132	DRA4|DRA4_2408	IL1403|IL1403_1643	CV56|CV56_1516	KLDS|KLDS_1635	LMG14418|LMG14418_1341		43	FALSE
OG_1453	Transcriptional regulator, TetR family	A76|A76_1008	UC509_9|UC5099_1539	FG2|FG2_0721	HP|HP_1091	LMG6897|LMG6897_1622	B40|B40_0919	SK11|SK11_1626	AM2|AM2_2101	SK110|SK110_2450	KW10|KW10_2029	KW2|KW2_1460	MG1363|MG1363_1033	NCDO763|NCDO763_2306	N41|N41_0590	V4|V4_0326	LMG8520|LMG8520_2617	IO_1|IO1_1497	LMG8526|LMG8526_1246	KF147|KF147_1684	KF282|KF282_1852	E34|E34_0500	KF201|KF201_1980	M20|M20_1685	ATCC19435|ATCC19435_1946	KF7|KF7_0562	LMG9449|LMG9449_2277	K231|K231_1920	K337|K337_1955	KF24|KF24_1782	Li1|Li1_1703	N42|N42_0797	ML8|ML8_1483	UC317|UC317_1319	KF67|KF67_1013	LMG9446|LMG9446_1606	KF146|KF146_0773	KF134|KF134_0031	KF196|KF196_1138	DRA4|DRA4_2414	IL1403|IL1403_1635	CV56|CV56_1510	KLDS|KLDS_1629	LMG14418|LMG14418_1335	P7266|P7266_0096	44	1
OG_1454	Xylose activator XylR (AraC family)	A76|A76_1013	UC509_9|UC5099_1534	FG2|FG2_0716	HP|HP_1085	LMG6897|LMG6897_1616	B40|B40_0913	SK11|SK11_1621	AM2|AM2_2105	SK110|SK110_2456	KW10|KW10_2023	KW2|KW2_1455	MG1363|MG1363_1038	NCDO763|NCDO763_2311	N41|N41_0596	V4|V4_0320	LMG8520|LMG8520_2621	IO_1|IO1_1491	LMG8526|LMG8526_1242	KF147|KF147_1680	KF282|KF282_1856	E34|E34_0496	KF201|KF201_1984	M20|M20_1689	ATCC19435|ATCC19435_1942	KF7|KF7_0558	LMG9449|LMG9449_2273	K231|K231_1924	K337|K337_1959	KF24|KF24_1786	Li1|Li1_1699	N42|N42_0793	ML8|ML8_1487	UC317|UC317_1323	KF67|KF67_1017	LMG9446|LMG9446_1602	KF146|KF146_0777	KF134|KF134_0035	KF196|KF196_1142	DRA4|DRA4_2420	IL1403|IL1403_1631	CV56|CV56_1506	KLDS|KLDS_1625	LMG14418|LMG14418_1331		43	FALSE
[truncated: 7,484 more rows]

## Sheet: 2. Species specific LaCOG
OG	Locus in SK11	Annotation
OG_745	SK11_2530	Acetyltransferase (EC 2.3.1.-)
OG_838	SK11_0075	Acetyltransferase, GNAT family
OG_480	SK11_0570	Adenosine (5')-pentaphospho-(5'')-adenosinepyrophosphohydrolase (EC 3.6.1.-)
OG_453	SK11_1556	cation transporter
[truncated: 66 more rows]

## Sheet: 3. HM matrix genotype-phenotype
Detailed information belonging to Fig. 3
[truncated: 452 more rows]

## Sheet: 4. HM matrix isolation source
Detailed information belonging to Fig. 4
[truncated: 280 more rows]

[truncated: 1 more sheets: 5. HM matrix plasmid OGs]
