# Supplementary material
Source: Frontiers journal article supplement (https://www.frontiersin.org/articles/432974)
Supplement: Data_Sheet_1.ZIP [file Supplementary Table 2.xlsx]

## Sheet: 1. Pseudogenes in >8 strains
Table S2: Pseudogenes occuring in more than 8 strains
	Genotype		cremoris									cremoris						lactis
	Phenotype		cremoris									lactis						lactis
OG	Function	Count	FG2	HP	LMG6897	B40	UC509_9	AM2	SK110	SK11	A76	KW10	KW2	N41	V4	NCDO763	MG1363	P7266	ATCC19435	E34	KF134	KF146	KF196	KF201	KF282	K231	KF24	K337	KF67	KF7	Li1	LMG14418	LMG8520	LMG8526	LMG9446	LMG9449	M20	ML8	N42	DRA4	UC317	KLDS	IL1403	IO_1	CV56
OG_82	Cell wall surface anchor family protein	35	c14|FG2_1385|54_2768|905aa@	c14|HP_1343|54_2768|905aa@	c17|LMG6897_1568|54_2768|905aa@	c25|B40_2521|54_1433|460aa@ c25|B40_2522|1430_2767|446aa@	gi|UC5099_1410|1328471_1331083|871aa@ gi|UC5099_1409|1328286_1328471|62aa@	c4|DRA4_0843|44543_47602|1020aa	c4|SK110_0798|44543_47602|1020aa	gi|SK11_1468|1366233_1369292|1020aa	gi|A76_1462|1352167_1355226|1020aa	c19|KW10_0573|15879_17378|500aa@	gi|KW2_1301|1378009_1383456|1816aa	c41|N41_0444|77_1186|370aa@	c40|V4_0643|172_660|163aa@ c25|V4_2223|24314_24652|113aa@	c108|NCDO763_2336|26_601|192aa@	gi|MG1363_1172|1093651_1094226|192aa@ gi|MG1363_1170|1089321_1093370|1350aa@	c7|P7266_1419|66744_70280|1179aa@	c1|ATCC19435_0331|229247_231499|751aa@	c7|E34_0766|140108_143959|1284aa	c0|KF134_1626|82173_84353|727aa@	c1|KF146_0511|82214_84394|727aa@	c4|KF196_0877|133736_135916|727aa@	c7|KF201_0746|2_1774|591aa@	c50|KF282_0948|65_886|274aa@	c7|K231_0717|24407_25228|274aa@ c7|K231_0716|22976_24334|453aa@	c28|KF24_2420|574_2826|751aa@	c6|K337_1809|140_1450|437aa@	c9|KF67_0810|585_2690|702aa@	c1|KF7_0426|101534_103786|751aa@	c5|Li1_1152|96968_99220|751aa@	c32|LMG14418_1146|583_909|109aa@ c32|LMG14418_1147|913_2835|641aa@	c22|LMG8520_0311|22984_25701|906aa@		c8|LMG9446_0025|22311_24491|727aa@	c29|LMG9449_1403|618_2870|751aa@	c91|M20_2108|578_1357|260aa@	c33|ML8_0298|20763_22940|726aa@	c2|N42_1572|188642_189463|274aa@	c2|AM2_1284|20762_22939|726aa@	c19|UC317_0338|14132_16309|726aa@	gi|KLDS_1488|1471667_1473919|751aa@	gi|IL1403_1441|1359619_1361796|726aa@	gi|IO1_1360|1416759_1420877|1373aa	gi|CV56_1375|1342900_1345077|726aa@
OG_944	Malate Na(+) symporter	29	c67|FG2_2053|44_814|257aa@	c59|HP_0744|44_814|257aa@	c58|LMG6897_1178|44_814|257aa@	c58|B40_1183|1363_2376|338aa@	gi|UC5099_0990|930253_931350|366aa@	c52|DRA4_0723|13949_14926|326aa@	c37|SK110_0440|13949_14926|326aa@	gi|SK11_0976|920473_921450|326aa@	gi|A76_1632|1519909_1521006|366aa@	c7|KW10_0654|84492_85769|426aa	gi|KW2_0857|895181_896278|366aa@	c6|N41_1792|71207_72484|426aa	c5|V4_1033|23297_24574|426aa	c16|NCDO763_1721|28129_29286|386aa@	gi|MG1363_1698|1614001_1615278|426aa	c1|P7266_1107|89810_91090|427aa	c2|ATCC19435_1369|47251_48528|426aa	c6|E34_1821|69852_70949|366aa@	c2|KF134_0316|191060_192157|366aa@	c3|KF146_1282|57341_58438|366aa@	c1|KF196_0452|57239_58516|426aa	c0|KF201_1660|220083_221180|366aa@	c0|KF282_2225|310451_311548|366aa@	c1|K231_0606|209810_210907|366aa@	c2|KF24_1479|19104_20381|426aa	c0|K337_1692|295593_296690|366aa@	c1|KF67_0616|207664_208761|366aa@	c0|KF7_1464|47491_48768|426aa	c1|Li1_0453|47189_48286|366aa@	c83|LMG14418_1931|5570_6667|366aa@	c17|LMG8520_0420|27998_29095|366aa@	c4|LMG8526_0991|130652_131929|426aa	c1|LMG9446_0178|42097_43194|366aa@	c4|LMG9449_0815|121520_122797|426aa	c5|M20_1896|105491_106588|366aa@	c12|ML8_2521|47753_48850|366aa@	c0|N42_0986|53826_55103|426aa	c13|AM2_1438|7392_8489|366aa@	c7|UC317_2099|72348_73625|426aa	gi|KLDS_0945|925743_926840|366aa@	gi|IL1403_0974|923583_924680|366aa@	gi|IO1_0890|918451_919728|426aa	gi|CV56_0929|906637_907734|366aa@
OG_166	Transporter	29				c96|B40_1553|5819_5932|38aa@	gi|UC5099_2343|2220435_2220548|38aa@	c2|DRA4_1459|68600_68713|38aa@	c2|SK110_1423|68600_68713|38aa@	gi|SK11_2584|2396277_2396390|38aa@	gi|A76_2625|2422967_2423080|38aa@	c13|KW10_0881|8647_9102|152aa	gi|KW2_2308|2397011_2397124|38aa@	c14|N41_2569|666_1121|152aa	c21|V4_2302|30591_31073|161aa	c50|NCDO763_1687|666_1121|152aa	gi|MG1363_2626|2499079_2499534|152aa		c35|ATCC19435_1677|8076_8189|38aa@	c14|E34_2275|582_695|38aa@	c10|KF134_2224|654_947|98aa@	c13|KF146_0986|654_947|98aa@	c11|KF196_1015|654_947|98aa@	c16|KF201_2077|653_946|98aa@	c5|KF282_1181|71806_72261|152aa	c11|K231_1062|651_944|98aa@	c61|KF24_1286|5642_5935|98aa@	c13|K337_0969|17394_17687|98aa@	c74|KF67_0911|955_1068|38aa@	c11|KF7_0997|654_947|98aa@	c10|Li1_2274|651_944|98aa@	c147|LMG14418_0511|651_944|98aa@	c3|LMG8520_2218|4314_4427|38aa@	c16|LMG8526_2183|26050_26505|152aa	c15|LMG9446_0540|654_947|98aa@	c11|LMG9449_0857|654_767|38aa@	c17|M20_0453|8241_8534|98aa@	c47|ML8_0314|12250_12705|152aa	c25|N42_2522|26359_26652|98aa@	c118|AM2_1260|124_579|152aa	c47|UC317_0571|12250_12705|152aa	gi|KLDS_2631|2552612_2552905|98aa@	gi|IL1403_2434|2340004_2340297|98aa@	gi|IO1_2319|2395552_2395845|98aa@	gi|CV56_2461|2374072_2374185|38aa@
OG_62	internalin, putative (LPXTG motif)	29	c38|FG2_0908|1862_4045|728aa@c38|FG2_0907|1266_1784|173aa@	c33|HP_0284|1862_4045|728aa@c33|HP_0283|1266_1784|173aa@	c32|LMG6897_0694|1862_4045|728aa@c32|LMG6897_0693|1266_1784|173aa@	c59|B40_0768|1861_4044|728aa@c59|B40_0767|1265_1783|173aa@	gi|UC5099_2273|2142765_2144858|698aa@gi|UC5099_2274|2144936_2145454|173aa@	c61|DRA4_1173|1858_3366|503aa@c61|DRA4_1174|3433_4038|202aa@c61|DRA4_1172|1262_1780|173aa@	c60|SK110_2482|1858_3366|503aa@ c60|SK110_2483|3433_4038|202aa@c60|SK110_2481|1262_1780|173aa@	gi|SK11_2514|2319269_2320777|503aa@gi|SK11_2513|2318597_2319202|202aa@gi|SK11_2515|2320855_2321373|173aa	gi|A76_2531|2328727_2330892|722aa@gi|A76_2532|2330970_2331488|173aa@	c17|KW10_1561|1240_4047|936aa	gi|KW2_2233|2312753_2315560|936aa	c36|N41_0113|16190_18967|926aa	c20|V4_0140|1268_4507|1080aa	c18|NCDO763_1304|1268_4045|926aa	gi|MG1363_2548|2414829_2417606|926aa	c6|P7266_0746|3854_6244|797aa@c1|P7266_1103|84730_86058|443aa@ c1|P7266_1104|86066_87043|326aa@	c20|ATCC19435_0094|1193_2947|585aa@	c13|E34_1014|30007_32808|934aa	c13|KF134_1085|1196_2950|585aa@	c17|KF146_1923|1196_2950|585aa@	c16|KF196_2096|32707_34461|585aa@	c13|KF201_1065|109_651|181aa@	c16|KF282_1303|32844_35645|934aa	c16|K231_2046|1193_2947|585aa@	c19|KF24_0388|1735_2946|404aa@c19|KF24_0387|1193_1510|106aa@	c16|K337_2069|1195_4518|1108aa	c20|KF67_0124|2776_3474|233aa@ c20|KF67_0123|1196_2779|528aa@	c14|KF7_2296|2038_2736|233aa@c14|KF7_2295|1196_2041|282aa@	c17|Li1_0935|1173_2927|585aa@	c13|LMG14418_1475|1225_3996|924aa	c104|LMG8520_0569|129_671|181aa@ c81|LMG8520_1990|1199_2188|330aa@	c14|LMG8526_2378|1455_3470|672aa@	c16|LMG9446_1648|2776_3474|233aa@c16|LMG9446_1647|1196_2779|528aa	c20|LMG9449_0115|1193_2947|585aa@	c24|M20_2062|86_370|95aa@	c19|ML8_0185|3011_4021|337aa@ c19|ML8_0183|1222_2442|407aa@c19|ML8_0184|2439_2957|173aa@	c20|N42_0118|1200_4001|934aa	c21|AM2_1142|32822_35623|934aa	c20|UC317_0117|3011_4021|337aa@ c20|UC317_0115|1222_2442|407aa@c20|UC317_0116|2439_2957|173aa@	gi|KLDS_2515|2440297_2443098|934aa	gi|IL1403_2357|2256203_2258983|927aa@gi|IL1403_2358|2259052_2259525|158aa@	gi|IO1_2246|2317835_2320636|934aa	gi|CV56_2328|2245901_2246911|337aa@ gi|CV56_2329|2246965_2248701|579aa@
OG_102	FIG00755099: hypothetical protein	21	c34|FG2_1978|285_1253|323aa@	c30|HP_1053|285_1253|323aa@	c26|LMG6897_1812|1632_3275|548aa	c39|B40_2619|1632_3263|544aa	gi|UC5099_1983|1875158_1876882|575aa	c34|DRA4_1185|293_1261|323aa@	c26|SK110_0831|290_1258|323aa@	gi|SK11_2196|2033896_2035620|575aa	gi|A76_2201|2029237_2030880|548aa	c5|KW10_1762|252_1220|323aa@	gi|KW2_1961|2049328_2051106|593aa	c18|N41_1276|1633_3222|530aa@	c41|V4_0662|239_1207|323aa@	c29|NCDO763_1233|244_1212|323aa@	gi|MG1363_2244|2125886_2127502|539aa	c5|P7266_1001|128329_129186|286aa@c5|P7266_1002|129266_129967|234aa	c39|ATCC19435_2572|389_1357|323aa@	c0|E34_1399|322_1290|323aa@	c1|KF134_0736|317643_319142|500aa	c0|KF146_1912|414402_415901|500aa	c0|KF196_1448|2275_3774|500aa	c25|KF201_1772|2207_3679|491aa@	c10|KF282_2416|331_1299|323aa@	c25|K231_1751|5910_7382|491aa	c56|KF24_2592|6109_7077|323aa@	c2|K337_0355|216308_217807|500aa	c25|KF67_2270|2209_3708|500aa	c23|KF7_1777|3174_3719|182aa@ c23|KF7_1776|2219_3196|326aa@	c27|Li1_1263|6238_7437|400aa@ c27|Li1_1262|5965_6231|89aa@	c23|LMG14418_1028|367_1866|500aa	c61|LMG8520_1160|1956_3218|421aa@ c61|LMG8520_1161|3190_3456|89aa@	c17|LMG8526_1771|5864_6889|342aa@	c12|LMG9446_2443|64354_65853|500aa	c45|LMG9449_1431|5882_7147|422aa@	c11|M20_0882|2162_3661|500aa	c67|ML8_1947|5886_6854|323aa@	c11|N42_0858|2225_3724|500aa	c49|AM2_0081|5883_7355|491aa@c49|AM2_0082|7972_8094|41aa	c54|UC317_2010|5884_7410|509aa	gi|KLDS_2184|2135424_2136923|500aa	gi|IL1403_2059|1975894_1977393|500aa	gi|IO1_1993|2066677_2068257|527aa	gi|CV56_2013|1954581_1956134|518aa
OG_1871	HTH-type transcriptional regulator Rgg family	20											gi|KW2_0036|42379_43260|294aa	c22|N41_0361|25129_26010|294aa	c9|V4_0788|57144_58025|294aa	c38|NCDO763_1517|3145_4026|294aa	gi|MG1363_0066|63015_63896|294aa		c18|ATCC19435_1285|13540_13713|58aa@	c2|E34_0349|222141_222314|58aa@	c3|KF134_1535|231524_231697|58aa@	c8|KF146_0032|40806_40979|58aa@	c6|KF196_1916|76060_76233|58aa@	c3|KF201_1291|38155_38328|58aa@	c5|KF282_1208|98816_99697|294aa	c8|K231_0089|88751_88924|58aa@	c7|KF24_2198|23560_23733|58aa@	c4|K337_0917|151160_152041|294aa	c13|KF67_0782|40848_41021|58aa@		c0|Li1_1803|39741_39914|58aa@	c22|LMG14418_0215|23535_23708|58aa@	c6|LMG8520_1858|5072_5245|58aa@	c3|LMG8526_1475|190431_191312|294aa	c0|LMG9446_1121|272808_272981|58aa@	c6|LMG9449_1878|41379_41552|58aa@	c12|M20_2569|40691_41101|137aa@ c12|M20_2570|41160_41573|138aa@	c2|ML8_0835|89483_90364|294aa	c12|N42_2661|56474_56647|58aa@	c18|AM2_1234|12331_12504|58aa@	c9|UC317_1542|7690_8571|294aa	gi|KLDS_0034|40702_40875|58aa@	gi|IL1403_0065|58727_58900|58aa@	gi|IO1_0033|39265_39438|58aa@	gi|CV56_0090|55984_56865|294aa
OG_122	Cell wall surface anchor family protein	19	c129|FG2_0173|1349_2197|283aa	c118|HP_1977|1349_2197|283aa	c112|LMG6897_1994|1349_2197|283aa	c49|B40_1492|14079_14615|179aa@ c49|B40_1491|13704_14063|120aa@		c19|DRA4_0271|19106_20017|304aa	c20|SK110_0113|15727_16638|304aa	gi|SK11_1732|1611897_1612808|304aa	gi|A76_0913|863608_864183|192aa@ gi|A76_0912|863271_863648|126aa@		gi|KW2_1549|1639914_1640825|304aa	c10|N41_2403|4830_5741|304aa	c19|V4_0634|26402_27313|304aa	c5|NCDO763_1739|2232_3143|304aa	gi|MG1363_0929|871373_872284|304aa	c3|P7266_0233|120653_121552|300aa	c24|ATCC19435_2009|1209_2120|304aa	c1|E34_0589|221220_222131|304aa	c9|KF134_1288|90165_90695|177aa@c9|KF134_1287|90030_90161|44aa	c0|KF146_1512|26895_27425|177aa@c0|KF146_1511|26760_26891|44aa	c19|KF196_0661|2191_2721|177aa@c19|KF196_0662|2725_2856|44aa	c10|KF201_2168|43950_44480|177aa@c10|KF201_2169|44484_44615|44aa	c9|KF282_0921|82452_83363|304aa	c9|K231_1191|64611_65522|304aa	c20|KF24_0107|13379_14290|304aa	c11|K337_1075|54742_55197|152aa@c11|K337_1074|54607_54738|44aa	c32|KF67_2450|2191_2721|177aa@c32|KF67_2451|2725_2856|44aa	c13|KF7_0984|51747_52277|177aa@c13|KF7_0983|51612_51743|44aa	c14|Li1_2440|28052_28963|304aa	c123|LMG14418_1946|1298_1828|177aa@c123|LMG14418_1947|1832_1963|44aa	c37|LMG8520_0448|12487_13398|304aa		c10|LMG9446_2371|80418_80948|177aa@c10|LMG9446_2370|80283_80414|44aa	c15|LMG9449_0608|26146_27057|304aa	c36|M20_0128|13487_14017|177aa@c36|M20_0127|13352_13483|44aa	c0|ML8_0514|13569_14099|177aa@	c15|N42_0616|2918_3448|177aa@c15|N42_0617|3452_3583|44aa	c0|AM2_0948|52888_53418|177aa@	c0|UC317_0997|110103_110633|177aa@	gi|KLDS_1723|1712704_1713234|177aa@	gi|IL1403_1731|1642071_1642601|177aa@	gi|IO1_1587|1666891_1667802|304aa	gi|CV56_1604|1570622_1571152|177aa@
OG_1906	Type IV pilus biogenesis protein PilO	18																	c2|ATCC19435_1315|179_682|168aa@	c6|E34_1772|22830_23123|98aa@	c17|KF134_1833|111_614|168aa@	c3|KF146_1223|113_616|168aa@c26|KF146_1046|5832_6779|316aa	c1|KF196_0394|113_616|168aa@	c0|KF201_1710|266946_267239|98aa@	c0|KF282_2283|368333_368671|113aa@	c17|K231_1704|4174_7383|1070aa	c21|KF24_1302|67_570|168aa@	c18|K337_0112|5441_8311|957aa	c26|KF67_1712|115_618|168aa@	c0|KF7_1412|473_811|113aa@	c1|Li1_0401|69_572|168aa@	c10|LMG14418_2240|5572_8628|1019aa	c29|LMG8520_1262|16008_17792|595aa@ c29|LMG8520_1260|15145_15342|66aa@	c4|LMG8526_1053|192812_193195|128aa@	c21|LMG9446_1210|14102_14605|168aa@	c41|LMG9449_0387|74_901|276aa@	c13|M20_1580|188_790|201aa@	c12|ML8_2466|68_871|268aa@	c0|N42_0934|4229_7216|996aa	c13|AM2_1491|55372_58107|912aa	c21|UC317_1132|92_1096|335aa@	gi|KLDS_0888|874555_877611|1019aa	gi|IL1403_0920|873509_876700|1064aa	gi|IO1_0824|850092_853346|1085aa	gi|CV56_0874|856790_859753|988aa
OG_212	Glycosyl transferase	18	c56|FG2_2695|14801_15358|186aa@c56|FG2_2696|15355_15687|111aa	c51|HP_0454|14801_15358|186aa@c51|HP_0455|15355_15687|111aa	c49|LMG6897_1428|14801_15358|186aa@c49|LMG6897_1429|15355_15687|111aa	c48|B40_2297|2464_3024|187aa@	gi|UC5099_1336|1258362_1258982|207aa@gi|UC5099_1337|1258985_1259248|88aa@	c50|DRA4_1698|15292_15849|186aa@c50|DRA4_1699|15846_16178|111aa	c50|SK110_1688|15292_15849|186aa@c50|SK110_1689|15846_16178|111aa	gi|SK11_1391|1290659_1291216|186aa@gi|SK11_1392|1291213_1291545|111aa	gi|A76_1399|1295945_1296502|186aa@gi|A76_1400|1296499_1296831|111aa	c8|KW10_0035|35959_38286|776aa@c8|KW10_0036|38264_38401|46aa	gi|KW2_1208|1275550_1277877|776aa@gi|KW2_1209|1277855_1277992|46aa	c26|N41_0881|17822_19939|706aa@c26|N41_0882|19969_20148|60aa@c26|N41_0883|20126_20263|46aa	c4|V4_1569|66151_68112|654aa@c4|V4_1570|68228_68458|77aa@c4|V4_1571|68436_68573|46aa	c32|NCDO763_1222|17822_19939|706aa@c32|NCDO763_1223|19969_20148|60aa@c32|NCDO763_1224|20126_20263|46aa	gi|MG1363_1262|1181876_1183993|706aa@gi|MG1363_1261|1181667_1181846|60aa@gi|MG1363_1260|1181552_1181686|45aa	c11|P7266_1786|2981_5344|788aa	c1|ATCC19435_0191|68515_70989|825aa	c7|E34_0668|31193_33667|825aa	c0|KF134_1691|149250_151724|825aa	c1|KF146_0577|149269_151743|825aa	c4|KF196_0812|66388_68862|825aa	c7|KF201_0821|79587_82061|825aa	c19|KF282_0740|1571_4045|825aa	c7|K231_0793|104876_107350|825aa	c18|KF24_1434|1594_4068|825aa	c6|K337_1885|78411_80885|825aa	c3|KF67_1908|113379_115853|825aa	c1|KF7_0358|31671_34145|825aa	c5|Li1_1093|33651_36125|825aa	c53|LMG14418_0754|11161_13635|825aa	c21|LMG8520_1211|23291_24163|291aa@ c21|LMG8520_1210|22363_23337|325aa@	c0|LMG8526_1691|192928_195255|776aa	c11|LMG9446_0793|39681_42155|825aa	c5|LMG9449_2029|78151_79422|424aa@c5|LMG9449_2030|79479_80624|382aa	c16|M20_1777|28521_30467|649aa@ c16|M20_1778|30504_30995|164aa@	c14|ML8_1416|28337_30811|825aa	c2|N42_1434|31669_34143|825aa	c15|AM2_0620|39398_41872|825aa	c11|UC317_0875|39394_41868|825aa	gi|KLDS_1400|1383184_1385658|825aa	gi|IL1403_1378|1296101_1298575|825aa	gi|IO1_1258|1308866_1311340|825aa	gi|CV56_1313|1279747_1282221|825aa
OG_25	Predicted cell-wall-anchored protein SasA(LPXTG motif)	17					gi|UC5099_0922|870236_872770|845aa	c59|DRA4_1345|1565_3991|809aa	c61|SK110_1128|1565_3991|809aa	gi|SK11_0909|860190_862538|783aa@	gi|A76_1698|1578586_1581120|845aa	c22|KW10_0551|95_1387|431aa@		c40|N41_1501|90_1634|515aa@	c31|V4_2178|10500_11171|224aa@	c42|NCDO763_0484|90_1634|515aa@	gi|MG1363_1762|1672592_1674136|515aa@			c6|E34_1766|15698_18064|789aa	c22|KF134_0740|1106_2440|445aa@	c26|KF146_1042|1106_2440|445aa@		c0|KF201_1716|271700_274105|802aa	c4|KF282_1678|155817_158180|788aa	c17|K231_1700|172_750|193aa@			c41|KF67_0744|28_2463|812aa	c24|KF7_2283|85_1872|596aa@	c6|Li1_0969|5751_8174|808aa	c10|LMG14418_2236|398_2185|596aa@	c29|LMG8520_1253|8442_9431|330aa@					c70|ML8_0380|90_1307|406aa@	c0|N42_0930|216_962|249aa@	c13|AM2_1495|61485_62819|445aa@		gi|KLDS_0884|868671_871106|812aa	gi|IL1403_0915|867687_869597|637aa@	gi|IO1_0820|844266_846713|816aa@	gi|CV56_0870|850968_853403|812aa
OG_211	UDP-N-acetylglucosamine 2-epimerase (EC5.1.3.14)	17	c198|FG2_0577|1178_1918|247aa@	c185|HP_2025|66_806|247aa@	c173|LMG6897_1643|66_806|247aa@	c13|B40_2127|34133_34873|247aa@	gi|UC5099_1339|1260390_1261103|238aa@	c20|DRA4_0116|34436_35176|247aa@	c21|SK110_1192|34436_35176|247aa@	gi|SK11_1394|1292660_1293400|247aa@	gi|A76_1402|1297946_1298686|247aa@	c8|KW10_0037|38423_39511|363aa	gi|KW2_1210|1278014_1279102|363aa	c26|N41_0885|20690_21076|129aa@ c26|N41_0884|20285_20662|126aa@	c4|V4_1572|68595_69683|363aa	c32|NCDO763_1226|20690_21076|129aa@c32|NCDO763_1225|20285_20662|126aa	gi|MG1363_1258|1180739_1181125|129aa@ gi|MG1363_1259|1181153_1181530|126aa@	c11|P7266_1787|5337_6425|363aa	c1|ATCC19435_0192|70979_72067|363aa	c7|E34_0669|33657_34745|363aa	c0|KF134_1690|148172_149260|363aa	c1|KF146_0576|148191_149279|363aa	c4|KF196_0813|68852_69940|363aa	c7|KF201_0820|78509_79597|363aa	c19|KF282_0739|493_1581|363aa	c7|K231_0792|103798_104886|363aa	c18|KF24_1433|516_1604|363aa	c6|K337_1884|77630_78421|264aa@c6|K337_1883|77334_77606|91aa	c3|KF67_1909|115843_116931|363aa	c1|KF7_0359|34135_35223|363aa	c5|Li1_1094|36115_37203|363aa	c53|LMG14418_0755|13625_14560|312aa@c53|LMG14418_0756|14572_14712|47aa@	c21|LMG8520_1212|24153_24905|251aa@c21|LMG8520_1213|24906_25241|112aa@	c0|LMG8526_1692|195392_196480|363aa	c11|LMG9446_0792|38603_39691|363aa	c5|LMG9449_2027|77074_78063|330aa	c16|M20_1776|27443_28531|363aa	c14|ML8_1415|27259_28347|363aa	c2|N42_1435|34133_35098|322aa@	c15|AM2_0619|38320_39408|363aa	c11|UC317_0874|38316_39404|363aa	gi|KLDS_1401|1385648_1386583|312aa@gi|KLDS_1402|1386595_1386735|47aa@	gi|IL1403_1379|1298565_1299653|363aa	gi|IO1_1259|1311330_1312418|363aa	gi|CV56_1314|1282211_1283299|363aa
OG_1736	Phosphoheptose isomerase (EC 5.3.1.-)	16	c20|FG2_0063|23589_24164|192aa	c94|HP_2186|5979_6554|192aa	c89|LMG6897_1397|3272_3847|192aa	c79|B40_2318|6920_7495|192aa	gi|UC5099_2151|2031886_2032461|192aa	c13|DRA4_1561|3257_3832|192aa	c9|SK110_1580|3257_3832|192aa	gi|SK11_2390|2207266_2207841|192aa	gi|A76_2406|2216917_2217492|192aa		gi|KW2_2115|2202980_2203555|192aa	c16|N41_1875|35550_36125|192aa	c10|V4_2384|67520_68056|179aa	c3|NCDO763_2158|35548_36123|192aa	gi|MG1363_2425|2302920_2303495|192aa		c5|ATCC19435_1809|60985_61176|64aa@c5|ATCC19435_1808|60689_60943|85aa					c4|KF201_0925|60368_60502|45aa@	c2|KF282_0306|145765_145911|49aa@	c2|K231_0354|162016_162207|64aa@ c2|K231_0355|162249_162503|85aa@	c1|KF24_0305|162109_162300|64aa@ c1|KF24_0306|162342_162596|85aa@				c2|Li1_0324|164005_164196|64aa@ c2|Li1_0325|164238_164492|85aa@	c5|LMG14418_1683|26496_26615|40aa@	c0|LMG8520_1040|56843_56989|49aa@			c14|LMG9449_2761|27694_27885|64aa@c14|LMG9449_2760|27398_27652|85aa	c8|M20_0023|21477_21611|45aa@	c24|ML8_1134|2948_3067|40aa@		c25|AM2_2258|28337_28456|40aa@	c62|UC317_2139|2948_3067|40aa@	gi|KLDS_2360|2306656_2306775|40aa@	gi|IL1403_2244|2151172_2151291|40aa@		gi|CV56_2169|2111921_2112040|40aa@
OG_38	Late competence protein ComEC, DNA transport	16	c93|FG2_0168|9000_10271|424aa@c93|FG2_0169|10268_10777|170aa@c97|FG2_1775|9813_10106|98aa@	c82|HP_0351|9000_10271|424aa@ c82|HP_0352|10268_10777|170aa@c89|HP_1382|9811_10104|98aa@	c77|LMG6897_1851|9001_10272|424aa@ c77|LMG6897_1852|10269_10778|170aa@c85|LMG6897_1959|9813_10106|98aa@	c99|B40_0760|590_1996|469aa@c99|B40_0759|84_593|170aa@c86|B40_1096|8840_9133|98aa	gi|UC5099_1820|1720595_1721866|424aa@ gi|UC5099_1819|1720089_1720598|170aa@gi|UC5099_1816|1718796_1719023|76aa	c69|DRA4_0793|8861_10267|469aa@c69|DRA4_0794|10264_10773|170aa@c71|DRA4_0473|9598_9891|98aa	c71|SK110_0459|8996_10267|424aa@ c71|SK110_0460|10264_10773|170aa@c73|SK110_1879|9598_9891|98aa@	gi|SK11_1971|1835353_1836624|424aa gi|SK11_1970|1834847_1835356|170aa@gi|SK11_1968|1833554_1833781|76aa	gi|A76_0709|668867_670201|445aa@ gi|A76_0711|671289_671765|159aa@gi|A76_0713|672831_673058|76aa@	c16|KW10_1928|26663_28861|733aa	gi|KW2_1748|1845476_1847539|688aa	c8|N41_0024|19333_20352|340aa@ c8|N41_0025|20346_21188|281aa@c8|N41_0026|21188_21529|114aa@	c8|V4_0102|94404_96602|733aa	c6|NCDO763_1831|10594_11613|340aa@c6|NCDO763_1832|11607_12449|281aa8c6|NCDO763_1833|12563_12790|76aa	gi|MG1363_2028|1934943_1935737|265aa@ gi|MG1363_2029|1936121_1937005|295aa@	c9|P7266_1960|100164_102230|689aa	c10|ATCC19435_2416|38719_40917|733aa	c0|E34_1612|191859_194069|737aa	c1|KF134_0531|132739_134937|733aa	c0|KF146_1716|231734_233878|715aa	c0|KF196_1655|188707_190917|737aa	c1|KF201_0542|135458_137668|737aa	c6|KF282_1069|78763_80973|737aa	c4|K231_0871|44171_46381|737aa	c4|KF24_0837|129490_131688|733aa	c2|K337_0205|65869_68079|737aa	c0|KF67_2104|132737_134947|737aa	c9|KF7_1160|70016_72226|737aa	c9|Li1_0891|45807_47849|681aa	c50|LMG14418_1580|3554_5149|532aa@c50|LMG14418_1581|5206_5751|182aa@	c12|LMG8520_2543|37388_38530|381aa@ c12|LMG8520_2542|36985_37350|122aa@c12|LMG8520_2541|36319_36864|182aa@	c1|LMG8526_0565|106221_108419|733aa	c5|LMG9446_1810|132786_134912|709aa	c2|LMG9449_1592|94858_96984|709aa	c0|M20_1103|156508_158706|733aa	c13|ML8_2038|43336_44841|502aa@ c13|ML8_2039|44913_45533|207aa@	c10|N42_2554|33433_35631|733aa	c8|AM2_0044|39148_41274|709aa	c4|UC317_0730|34333_35838|502aa@ c4|UC317_0729|33797_34261|155aa@	gi|KLDS_1980|1951087_1953285|733aa	gi|IL1403_1912|1830596_1832806|737aa	gi|IO1_1831|1906660_1908858|733aa	gi|CV56_1807|1770870_1773068|733aa
OG_1570	hypothetical protein	16	c84|FG2_1784|1904_2092|63aa@	c265|HP_2259|170_358|63aa@	c86|LMG6897_1093|9809_9997|63aa@	c27|B40_1656|260_442|61aa@	gi|UC5099_2197|2066915_2067103|63aa@	c13|DRA4_1607|37275_37463|63aa@	c9|SK110_1626|37275_37463|63aa@	gi|SK11_2436|2241285_2241473|63aa@	gi|A76_2451|2250496_2250684|63aa@	c1|KW10_0517|164838_165026|63aa@	gi|KW2_2161|2237071_2237259|63aa@	c16|N41_1828|1906_2094|63aa@	c10|V4_2337|33836_34024|63aa@	c3|NCDO763_2110|1906_2094|63aa@	gi|MG1363_2473|2336949_2337380|144aa		c5|ATCC19435_1765|33740_34171|144aa	c5|E34_1962|33732_34163|144aa	c5|KF134_2069|165145_165576|144aa	c4|KF146_0952|109170_109601|144aa	c3|KF196_1412|197193_197624|144aa	c4|KF201_0883|33741_34172|144aa	c2|KF282_0347|172137_172568|144aa	c2|K231_0397|189021_189452|144aa	c1|KF24_0347|188964_189395|144aa	c3|K337_1368|171999_172430|144aa	c14|KF67_2588|11390_11821|144aa	c3|KF7_1409|177462_177893|144aa	c2|Li1_0367|190998_191429|144aa	c5|LMG14418_1643|78_266|63aa@	c0|LMG8520_1080|83182_83613|144aa	c2|LMG8526_0423|213886_214074|63aa@	c2|LMG9446_1446|173451_173882|144aa	c14|LMG9449_2718|450_881|144aa	c8|M20_0067|47840_48271|144aa	c24|ML8_1175|29315_29746|144aa	c3|N42_2451|173897_174328|144aa	c25|AM2_2218|1675_2106|144aa	c23|UC317_1094|26552_26983|144aa	gi|KLDS_2400|2333005_2333436|144aa	gi|IL1403_2286|2180233_2180664|144aa	gi|IO1_2182|2246271_2246702|144aa	gi|CV56_2209|2138290_2138721|144aa
OG_1806	FIG00755154: hypothetical protein	16										c17|KW10_1591|30434_31651|406aa@	gi|KW2_2202|2285506_2286723|406aa@	c33|N41_0564|8976_9902|309aa@ c33|N41_0565|9899_11098|400aa@	c20|V4_0168|29467_30393|309aa@ c20|V4_0169|30390_31589|400aa@	c18|NCDO763_1332|29002_29928|309aa@c18|NCDO763_1333|29925_31124|400aa	gi|MG1363_2520|2388946_2389872|309aa@ gi|MG1363_2519|2387750_2388949|400aa@				c4|KF134_1020|169060_169986|309aa c13|KF134_1105|22534_23460|309aa c13|KF134_1106|23457_24656|400aa	c17|KF146_1943|22461_23387|309aa@ c17|KF146_1944|23384_24583|400aa@	c16|KF196_2076|12197_13123|309aa@ c16|KF196_2075|11001_12200|400aa@					c16|K337_2089|22503_23429|309aa@c16|K337_2090|23426_24625|400aa	c20|KF67_0144|22986_23912|309aa@ c20|KF67_0145|23909_25108|400aa@	c14|KF7_2316|22385_23311|309aa@ c14|KF7_2317|23308_24507|400aa@		c13|LMG14418_1497|23789_25912|708aa	c26|LMG8520_0874|17851_18777|309aa@ c26|LMG8520_0875|18774_19853|360aa@	c14|LMG8526_2402|26091_28214|708aa	c16|LMG9446_1671|24103_25302|400aa@			c19|ML8_0209|23727_24653|309aa@ c19|ML8_0210|24650_25849|400aa@		c21|AM2_1120|10906_13029|708aa	c20|UC317_0140|23726_24652|309aa@ c20|UC317_0141|24649_25848|400aa@	gi|KLDS_2493|2418381_2420504|708aa	gi|IL1403_2336|2234286_2236409|708aa	gi|IO1_2227|2299048_2299974|309aa@ gi|IO1_2226|2297852_2299051|400aa@	gi|CV56_2304|2224073_2226196|708aa
OG_26	Neutral endopeptidase O (EC 3.4.24.-)	15	c27|FG2_1698|14085_15665|527aa@	c10|HP_1293|21840_23420|527aa@	c12|LMG6897_2480|21840_23420|527aa@	c44|B40_1716|7264_8844|527aa@	gi|UC5099_1851|1753420_1755303|628aa	c29|DRA4_1293|21371_23254|628aa	c32|SK110_1210|21246_23129|628aa	gi|SK11_2014|1877981_1879864|628aa	gi|A76_0629|600898_602433|512aa@ gi|A76_0628|600550_600897|116aa@	c5|KW10_1877|111967_113850|628aa	gi|KW2_1849|1939459_1941342|628aa	c4|N41_0844|90051_91934|628aa	c7|V4_1494|101102_102985|628aa	c10|NCDO763_2349|14073_15956|628aa	gi|MG1363_2064|1972038_1973921|628aa	c5|P7266_0895|20077_21960|628aa	c15|ATCC19435_0593|44443_44655|71aa@	c0|E34_1520|114893_116776|628aa	c1|KF134_0563|168543_170426|628aa	c0|KF146_1748|267483_269366|628aa	c0|KF196_1623|153231_155114|628aa	c1|KF201_0574|171263_173146|628aa	c13|KF282_0827|47282_47569|96aa	c13|K231_1006|20_193|58aa@	c12|KF24_2562|45130_45303|58aa@	c2|K337_0240|105067_106950|628aa	c0|KF67_2136|168540_170423|628aa	c35|KF7_1214|1749_1922|58aa@c21|KF7_2110|16973_17146|58aa@	c12|Li1_2404|46477_46611|45aa@	c46|LMG14418_2312|855_2738|628aa	c24|LMG8520_2012|12282_14165|628aa	c1|LMG8526_0601|145485_147368|628aa	c14|LMG9446_2450|8_181|58aa@		c0|M20_1146|208854_210737|628aa	c17|ML8_1626|37284_37571|96aa@	c19|N42_0422|16_228|71aa@	c20|AM2_0146|37897_38184|96aa@	c36|UC317_0113|17176_17388|71aa@	gi|KLDS_2012|1986890_1988773|628aa	gi|IL1403_1944|1866399_1868282|628aa	gi|IO1_1863|1942465_1944348|628aa	gi|CV56_1839|1806672_1808555|628aa
OG_1625	Transcriptional regulator	15	c45|FG2_2052|17015_17560|182aa@c7|FG2_2493|33379_33684|102aa	c42|HP_0277|17015_17560|182aa@c3|HP_1212|283_471|63aa	c42|LMG6897_0232|61_606|182aa@c4|LMG6897_1746|251_439|63aa	c9|B40_0953|61_606|182aa@c6|B40_2157|251_439|63aa	gi|UC5099_0800|752061_752606|182aa@gi|UC5099_0802|753728_753916|63aa	c42|DRA4_0474|61_606|182aa@c11|DRA4_0916|251_439|63aa	c42|SK110_0461|61_606|182aa@c13|SK110_1526|251_439|63aa	gi|SK11_0788|744959_745504|182aa@gi|SK11_0790|746626_746814|63aa	gi|A76_1819|1696915_1697460|182aa@gi|A76_1817|1695683_1695808|42aa	c9|KW10_1140|99631_100479|283aa	gi|KW2_0680|706957_707805|283aa	c3|N41_2273|70241_71089|283aa	c1|V4_0479|89025_89873|283aa	c2|NCDO763_1381|36265_37113|283aa	gi|MG1363_1872|1785382_1786230|283aa	c2|P7266_0675|120630_121478|283aa	c7|ATCC19435_2062|5041_5265|75aa@c7|ATCC19435_2063|5664_5888|75aa	c9|E34_1145|85353_86201|283aa	c7|KF134_0765|5000_5848|283aa	c6|KF146_1994|5044_5613|190aa@c6|KF146_1995|5669_5893|75aa	c8|KF196_0006|4998_5846|283aa	c8|KF201_0006|4977_5825|283aa	c4|KF282_1584|49441_50289|283aa	c3|K231_1286|103928_104551|208aa@c3|K231_1285|103704_103928|75aa	c3|KF24_2301|52068_52640|191aa@c3|KF24_2302|52691_52915|75aa	c7|K337_0761|106343_107191|283aa	c5|KF67_1074|5001_5849|283aa	c10|KF7_2120|4999_5847|283aa	c6|Li1_1060|108785_109468|228aa@c6|Li1_1059|108625_108741|39aa@	c182|LMG14418_0889|48_896|283aa	c10|LMG8520_2476|55311_55982|224aa	c5|LMG8526_2063|83820_84665|282aa	c3|LMG9446_2179|74507_75355|283aa	c1|LMG9449_0238|100493_101341|283aa	c7|M20_2208|91175_92023|283aa	c4|ML8_1793|72542_73114|191aa@c4|ML8_1792|72267_72491|75aa	c6|N42_1951|4971_5819|283aa	c11|AM2_0829|5065_5913|283aa	c6|UC317_1658|13821_14669|283aa	gi|KLDS_0793|767722_768570|283aa	gi|IL1403_0816|762819_763631|271aa	gi|IO1_0717|732110_732955|282aa	gi|CV56_0777|750012_750860|283aa
OG_60	2,3-butanediol dehydrogenase, R-alcoholforming, (R)- and (S)-acetoin-specific (EC 1.1.1.4)	15	c67|FG2_2059|5933_6523|197aa@ c67|FG2_2060|6584_7003|140aa@	c59|HP_0750|5933_6523|197aa@ c59|HP_0751|6584_7003|140aa@	c58|LMG6897_1184|5933_6523|197aa@ c58|LMG6897_1185|6584_7003|140aa@	c58|B40_1189|7499_8089|197aa@ c58|B40_1190|8150_8569|140aa@	gi|UC5099_0985|924541_925071|177aa@ gi|UC5099_0984|924061_924480|140aa@	c52|DRA4_0716|8236_8826|197aa@c52|DRA4_0715|7756_8175|140aa	c37|SK110_0434|8236_8826|197aa@ c37|SK110_0433|7756_8175|140aa@	gi|SK11_0969|914760_915350|197aa@gi|SK11_0968|914280_914699|140aa	gi|A76_1638|1526129_1526719|197aa@ gi|A76_1639|1526780_1527199|140aa@	c7|KW10_0659|90712_91782|357aa	gi|KW2_0851|889000_889926|309aa@gi|KW2_0852|889934_890059|42aa	c6|N41_1797|77428_78408|327aa	c5|V4_1028|17374_18354|327aa	c16|NCDO763_1726|34230_35210|327aa	gi|MG1363_1703|1620222_1621202|327aa		c2|ATCC19435_1363|41278_42348|357aa	c6|E34_1816|63699_64769|357aa	c2|KF134_0321|197248_198318|357aa	c3|KF146_1277|51184_52254|357aa	c1|KF196_0447|51262_52332|357aa		c0|KF282_2230|316631_317701|357aa	c1|K231_0611|215989_217059|357aa	c2|KF24_1474|13128_14198|357aa	c0|K337_1698|301773_302885|371aa	c1|KF67_0621|213852_214922|357aa	c0|KF7_1459|41519_42589|357aa	c1|Li1_0447|41032_42102|357aa	c121|LMG14418_1303|2947_3681|245aa@ c81|LMG14418_1828|8362_8733|124aa@	c17|LMG8520_0413|21966_23036|357aa	c4|LMG8526_0996|136830_137900|357aa	c1|LMG9446_0173|35944_37014|357aa	c30|LMG9449_2110|2975_4045|357aa	c5|M20_1902|111667_112737|357aa	c12|ML8_2514|41602_42456|285aa@c12|ML8_2515|42444_42671|76aa@	c0|N42_0981|47924_49711|596aa	c13|AM2_1444|13571_14641|357aa	c7|UC317_2106|78742_79596|285aa@c7|UC317_2105|78527_78754|76aa@	gi|KLDS_0939|919927_920661|245aa@ gi|KLDS_0935|918342_918587|82aa@	gi|IL1403_0968|917431_918501|357aa	gi|IO1_0884|912473_913543|357aa	gi|CV56_0922|900482_901336|285aa@gi|CV56_0923|901324_901551|76aa@
OG_606	Cysteine desulfurase (EC 2.8.1.7)	15	c49|FG2_1493|13782_14663|294aa@	c52|HP_0439|13782_14663|294aa@	c50|LMG6897_0998|13716_14597|294aa@	c22|B40_1530|13717_14598|294aa@	gi|UC5099_1914|1814494_1815375|294aa@	c27|DRA4_0551|13717_14598|294aa@	c28|SK110_2295|13717_14598|294aa@	gi|SK11_2082|1944382_1945263|294aa@	gi|A76_0560|535351_536232|294aa@	c5|KW10_1818|52872_53753|294aa@	gi|KW2_1908|2000310_2001191|294aa@	c4|N41_0784|30675_31556|294aa@	c7|V4_1435|41860_42741|294aa@	c9|NCDO763_1648|52936_53817|294aa@	gi|MG1363_2124|2032415_2033296|294aa@	c5|P7266_0952|84442_85518|359aa	c14|ATCC19435_2539|14295_15269|325aa	c0|E34_1451|47204_48178|325aa	c1|KF134_0623|230030_231004|325aa	c0|KF146_1808|328969_329943|325aa	c0|KF196_1562|92651_93625|325aa	c1|KF201_0651|245248_246222|325aa	c10|KF282_2468|47129_48103|325aa	c12|K231_2206|39926_40900|325aa	c8|KF24_0046|39920_40894|325aa	c2|K337_0304|169420_170394|325aa	c0|KF67_2196|230027_231001|325aa	c12|KF7_2230|17451_18425|325aa	c11|Li1_1565|17409_18383|325aa	c21|LMG14418_1125|15193_16167|325aa	c11|LMG8520_0928|32960_33934|325aa	c1|LMG8526_0660|206451_207425|325aa	c12|LMG9446_2391|17469_18443|325aa	c34|LMG9449_1329|341_1315|325aa	c11|M20_0933|49582_50556|325aa	c27|ML8_1668|29879_30853|325aa	c11|N42_0910|49632_50606|325aa	c22|AM2_0278|17226_18200|325aa	c43|UC317_1428|13563_14537|325aa	gi|KLDS_2072|2047466_2048440|325aa	gi|IL1403_2004|1927931_1928905|325aa	gi|IO1_1940|2019613_2020587|325aa	gi|CV56_1902|1868281_1869255|325aa
OG_1447	Malolactic regulator	15	c79|FG2_2378|11538_12245|236aa@	c71|HP_1598|11540_12247|236aa@	c67|LMG6897_1944|11537_12244|236aa@	c76|B40_1084|10080_10787|236aa@	gi|UC5099_0952|898526_899233|236aa@	c46|DRA4_2491|17412_18119|236aa@	c46|SK110_2479|17412_18119|236aa@	gi|SK11_0935|888307_889014|236aa@	gi|A76_1671|1552162_1552869|236aa@	c7|KW10_0683|110655_111362|236aa@	gi|KW2_0826|869420_870127|236aa@	c6|N41_1825|101023_101538|172aa@c32|N41_1225|22683_22883|67aa	c24|V4_1275|23161_23868|236aa@	c37|NCDO763_0475|22684_23391|236aa@	gi|MG1363_1735|1648077_1648784|236aa@	c1|P7266_1105|87100_88008|303aa	c2|ATCC19435_1335|19719_20594|292aa	c6|E34_1791|42143_43018|292aa	c17|KF134_1852|19656_20531|292aa	c3|KF146_1242|19657_20532|292aa	c1|KF196_0413|19658_20533|292aa	c0|KF201_1690|247051_247926|292aa	c0|KF282_2263|348430_349305|292aa	c17|K231_1724|26423_27298|292aa	c21|KF24_1321|19610_20485|292aa	c18|K337_0131|27304_28179|292aa	c26|KF67_1731|19643_20518|292aa	c0|KF7_1432|19836_20711|292aa	c1|Li1_0421|19595_20470|292aa	c10|LMG14418_2259|27670_28545|292aa	c35|LMG8520_1701|13632_14507|292aa	c4|LMG8526_1033|172914_173789|292aa	c1|LMG9446_0139|4339_5214|292aa	c28|LMG9449_2485|4275_5150|292aa	c13|M20_1600|19813_20688|292aa	c12|ML8_2486|19912_20787|292aa	c0|N42_0954|26240_27115|292aa	c13|AM2_1471|35457_36332|292aa	c21|UC317_1153|20137_21012|292aa	gi|KLDS_0908|896653_897528|292aa	gi|IL1403_0940|895741_896616|292aa	gi|IO1_0843|872390_873265|292aa	gi|CV56_0895|878793_879668|292aa
OG_93	integral membrane protein; transport andbinding protein; multidrug resistance; there is noconnection with the lmrA gene	14	c114|FG2_1299|575_1387|271aa@c114|FG2_1298|383_556|58aac114|FG2_1297|158_364|69aa	c122|HP_0151|575_1387|271aa@c122|HP_0150|383_556|58aa@c122|HP_0149|158_364|69aa	c101|LMG6897_1656|5580_6392|271aa@c101|LMG6897_1657|6411_6584|58aa@c101|LMG6897_1658|6603_6809|69aa	c77|B40_1902|4584_5393|270aa@c77|B40_1901|4392_4565|58aa@c77|B40_1900|4167_4373|69aa	gi|UC5099_2255|2125662_2126357|232aa@ gi|UC5099_2254|2125356_2125658|101aa@gi|UC5099_2256|2126376_2126582|69aa	c55|DRA4_0669|7587_8588|334aa@c55|DRA4_0668|7362_7568|69aa	c55|SK110_0636|7587_8588|334aa@c55|SK110_0635|7362_7568|69aa	gi|SK11_2492|2299839_2300840|334aa@gi|SK11_2493|2300859_2301065|69aa	gi|A76_2511|2311291_2312292|334aa@gi|A76_2512|2312311_2312517|69aa@	c17|KW10_1581|21614_22840|409aa	gi|KW2_2216|2296988_2298214|409aa	c33|N41_0555|208_1434|409aa	c20|V4_0159|20699_21925|409aa	c18|NCDO763_1323|20234_21460|409aa	gi|MG1363_2529|2397414_2398640|409aa	c15|P7266_1978|12671_13921|417aa	c20|ATCC19435_0106|15066_16292|409aa	c13|E34_1001|16639_17865|409aa	c13|KF134_1099|16653_17879|409aa	c17|KF146_1937|16580_17806|409aa	c16|KF196_2082|17778_19004|409aa	c13|KF201_1077|12758_13984|409aa	c16|KF282_1288|16636_17862|409aa	c16|K231_2058|14916_16142|409aa	c19|KF24_0403|16871_18097|409aa	c16|K337_2083|16625_17851|409aa	c20|KF67_0138|17105_18331|409aa	c14|KF7_2310|16506_17732|409aa	c17|Li1_0947|15047_16273|409aa	c13|LMG14418_1490|17909_19135|409aa	c26|LMG8520_0868|12222_13196|325aa@c26|LMG8520_0867|11970_12218|83aa@	c14|LMG8526_2394|17468_18694|409aa	c16|LMG9446_1663|17300_18526|409aa	c20|LMG9449_0127|15069_16295|409aa	c24|M20_2075|12483_13709|409aa	c19|ML8_0201|18086_18730|215aa@ c19|ML8_0202|18743_19072|110aa@c19|ML8_0200|17847_18089|81aa@	c20|N42_0134|19954_21180|409aa	c21|AM2_1127|18112_18909|266aa@c21|AM2_1126|17684_18130|149aa	c20|UC317_0133|18085_18729|215aa@ c20|UC317_0134|18742_19071|110aa@c20|UC317_0132|17846_18088|81aa@	gi|KLDS_2500|2425158_2426384|409aa	gi|IL1403_2342|2241064_2242290|409aa	gi|IO1_2233|2304627_2305853|409aa	gi|CV56_2311|2231193_2231825|211aa@ gi|CV56_2310|2230851_2231180|110aa@gi|CV56_2312|2231834_2231983|50aa@
OG_18	Co-activator of prophage gene expression IbrA	13				c55|B40_0397|276_713|146aa	gi|UC5099_1485|1404463_1405782|440aa	c3|DRA4_2261|45577_46896|440aa	c3|SK110_2198|13298_14617|440aa	gi|SK11_1559|1455318_1456637|440aa	gi|A76_1115|1039183_1040502|440aa	c18|KW10_0152|20899_22218|440aa	gi|KW2_1383|1465185_1466504|440aa	c7|N41_2117|14165_15235|357aa@	c2|V4_0248|28423_29742|440aa	c34|NCDO763_1149|9154_10224|357aa@	gi|MG1363_1095|1015189_1016259|357aa@		c21|ATCC19435_1218|16972_18291|440aa	c1|E34_0433|50721_52058|446aa	c0|KF134_1555|14759_16078|440aa	c1|KF146_0441|14801_16120|440aa	c4|KF196_0948|202011_203330|440aa	c5|KF201_2041|132423_133760|446aa	c23|KF282_2360|17386_18723|446aa	c5|K231_1989|114836_116155|440aa	c26|KF24_0880|13213_14532|440aa	c5|K337_2022|108882_110219|446aa	c9|KF67_0881|68784_70121|446aa	c1|KF7_0495|169802_171121|440aa	c3|Li1_1632|16042_17379|446aa	c60|LMG14418_2342|12080_13087|336aa@ c60|LMG14418_2343|13106_13399|98aa@	c27|LMG8520_0527|17722_18798|359aa@c27|LMG8520_0528|18799_19059|87aa@	c11|LMG8526_1107|13384_14703|440aa	c8|LMG9446_0096|90582_91397|272aa@c8|LMG9446_0097|91437_91901|155aa	c26|LMG9449_0848|15285_16604|440aa	c37|M20_0511|17677_18996|440aa	c40|ML8_0873|15408_16415|336aa@c40|ML8_0874|16434_16727|98aa@	c4|N42_0721|15197_15775|193aa@c4|N42_0722|15833_16516|228aa	c2|AM2_1351|88398_89405|336aa@c2|AM2_1352|89424_89735|104aac2|AM2_1352|89424_89735|104aa	c2|UC317_1387|113892_114899|336aa@ c2|UC317_1386|113580_113873|98aa@	gi|KLDS_1554|1539679_1540686|336aa@gi|KLDS_1555|1540705_1540998|98aa@	gi|IL1403_1568|1470159_1471166|336aa@gi|IL1403_1569|1471185_1471496|104aa	gi|IO1_1424|1484370_1485689|440aa	gi|CV56_1444|1411754_1412761|336aa@gi|CV56_1445|1412780_1413073|98aa
OG_407	FIG00756664: hypothetical protein	13	c6|FG2_2238|33148_33558|137aa	c25|HP_2430|1462_1872|137aa	c28|LMG6897_2381|1462_1872|137aa	c30|B40_1099|2287_2697|137aa	gi|UC5099_1221|1149179_1149589|137aa	c5|DRA4_1816|32985_33395|137aa	c31|SK110_2256|3873_4283|137aa	gi|SK11_1275|1178424_1178615|64aa@	gi|A76_1278|1183515_1183925|137aa	c3|KW10_1269|125107_125517|137aa	gi|KW2_1084|1138186_1138596|137aa	c13|N41_1571|34638_35048|137aa	c3|V4_1817|48694_49164|157aa	c36|NCDO763_0090|5023_5433|137aa	gi|MG1363_1401|1318671_1318862|64aa@	c13|P7266_1690|10866_11282|139aa	c3|ATCC19435_2233|76105_76392|96aa@	c8|E34_0092|89556_89969|138aa	c2|KF134_0145|20681_21094|138aa	c3|KF146_1458|231054_231467|138aa	c1|KF196_0623|228452_228865|138aa	c0|KF201_1463|21226_21513|96aa@	c0|KF282_2028|109323_109736|138aa	c1|K231_0423|20760_21047|96aa@	c22|KF24_0373|20804_21091|96aa@	c0|K337_1503|106353_106640|96aa@	c1|KF67_0445|37443_37730|96aa@	c0|KF7_1653|240214_240441|76aa@	c1|Li1_0637|237194_237607|138aa	c39|LMG14418_2380|11163_11576|138aa	c1|LMG8520_0252|71736_72149|138aa	c0|LMG8526_1589|79096_79437|114aa@	c1|LMG9446_0350|213160_213447|96aa@	c13|LMG9449_1724|42367_42780|138aa	c19|M20_0390|10579_10932|118aa@	c26|ML8_1838|21835_22248|138aa	c0|N42_1178|246142_246429|96aa@	c32|AM2_1145|917_1330|138aa	c3|UC317_2169|21835_22248|138aa	gi|KLDS_1206|1164339_1164752|138aa	gi|IL1403_1237|1161693_1162106|138aa	gi|IO1_1094|1120210_1120623|138aa	gi|CV56_1195|1146548_1146961|138aa
OG_1995	Cell surface protein precursor	13	c12|FG2_2659|12788_13747|320aa@	c13|HP_2037|12788_13747|320aa@	c15|LMG6897_0339|12787_13746|320aa@			c4|DRA4_0801|1566_2525|320aa@	c4|SK110_0756|1566_2525|320aa@	gi|SK11_1510|1411310_1412269|320aa@	gi|A76_1507|1398578_1399537|320aa@	c14|KW10_2208|44206_45369|388aa	gi|KW2_1342|1425292_1426455|388aa	c17|N41_0488|19989_20963|325aa@c17|N41_0489|21014_21151|46aa	c17|V4_0858|20010_21173|388aa	c12|NCDO763_2416|20023_21186|388aa	gi|MG1363_1139|1055122_1056285|388aa	c7|P7266_1445|96784_97965|394aa		c1|E34_0396|14159_15322|388aa				c12|KF201_2224|6228_7391|388aa	c14|KF282_2590|24012_25175|388aa							c51|LMG14418_0738|14303_15061|253aa@	c45|LMG8520_1290|17463_17801|113aa@					c44|ML8_1682|6233_7396|388aa	c24|N42_2087|6238_7401|388aa	c2|AM2_1315|52085_53248|388aa	c29|UC317_1204|16218_17381|388aa	gi|KLDS_1517|1503747_1504505|253aa@	gi|IL1403_1472|1391305_1392174|290aa@	gi|IO1_1389|1450077_1451240|388aa	gi|CV56_1406|1374900_1375523|208aa@
OG_108	FIG00755788: hypothetical protein	13	c29|FG2_0738|22095_22244|50aa@c76|FG2_1063|72_671|200aa@ c254|FG2_0418|51_728|226aa@	c24|HP_1108|22095_22244|50aa@c61|HP_1856|324_1445|374aa	c27|LMG6897_1639|22095_22244|50aa@c60|LMG6897_1353|12318_13439|374aa@	c38|B40_0938|22094_22243|50aa@c56|B40_2595|211_1332|374aa	gi|UC5099_1555|1468005_1468880|292aa@ gi|UC5099_1558|1471025_1471513|163aa@	c10|DRA4_2398|16118_16942|275aa@c10|DRA4_2399|17065_17457|131aa	c12|SK110_2435|17065_17457|131aa@c12|SK110_2434|16118_16942|275aa@	gi|SK11_1641|1528274_1529296|341aa	gi|A76_0991|937576_938916|447aa	c10|KW10_2046|94998_96338|447aa	gi|KW2_1481|1575285_1576625|447aa	c27|N41_0577|94_207|38aa@c10|N41_2482|77145_77765|207aa@ c10|N41_2481|76753_77136|128aa@	c2|V4_0338|124383_125723|447aa	c56|NCDO763_2475|7450_7563|38aa@c5|NCDO763_1819|74547_75167|207aa@c5|NCDO763_1818|74155_74538|128aa	gi|MG1363_1011|943687_944307|207aa@ gi|MG1363_1010|943295_943678|128aa@gi|MG1363_1017|947275_947388|38aa@	c9|P7266_1967|107873_109228|452aa	c6|ATCC19435_1960|90338_91003|222aa@c6|ATCC19435_1959|89662_90228|189aa	c1|E34_0520|155690_157030|447aa	c8|KF134_0019|16593_17933|447aa	c7|KF146_0761|16593_17933|447aa	c9|KF196_1126|16593_17933|447aa	c5|KF201_1967|45407_46747|447aa	c3|KF282_1839|56890_58230|447aa	c5|K231_1907|14707_16047|447aa	c9|KF24_1768|13897_15237|447aa	c5|K337_1942|14855_16195|447aa	c6|KF67_1001|16615_17955|447aa	c1|KF7_0574|261893_263233|447aa	c3|Li1_1716|114386_115726|447aa	c2|LMG14418_1348|55583_55957|125aa@c2|LMG14418_1349|56076_56900|275aa@	c46|LMG8520_2574|9954_10142|63aa@c46|LMG8520_2573|8802_9923|374aa	c9|LMG8526_1258|97706_99046|447aa	c9|LMG9446_1618|79174_80514|447aa	c7|LMG9449_2291|87203_88543|447aa	c9|M20_1673|13030_14370|447aa	c8|ML8_1471|13529_14869|447aa	c4|N42_0810|121270_122610|447aa	c3|AM2_2089|17235_18575|447aa	c2|UC317_1307|15301_16641|447aa	gi|KLDS_1642|1641976_1643295|440aa	gi|IL1403_1649|1569495_1570835|447aa	gi|IO1_1519|1602670_1604016|449aa	gi|CV56_1524|1499273_1500613|447aa
OG_1089	FIG00755055: hypothetical protein	13	c7|FG2_2485|25874_26251|126aa@c7|FG2_2484|25547_25816|90aa@	c3|HP_1220|7599_7976|126aa@c3|HP_1221|8043_8303|87aa@	c4|LMG6897_1754|7567_7944|126aa@c4|LMG6897_1755|8002_8271|90aa@	c6|B40_2165|7567_7944|126aa@c6|B40_2166|8011_8277|89aa@	gi|UC5099_0809|761042_761419|126aa@gi|UC5099_0810|761477_761752|92aa@	c11|DRA4_0923|7563_7940|126aa@c11|DRA4_0924|7998_8273|92aa	c13|SK110_1533|7563_7940|126aa@c13|SK110_1534|7998_8273|92aa@	gi|SK11_0797|753938_754315|126aa@gi|SK11_0798|754382_754648|89aa	gi|A76_1811|1688102_1688479|126aa@gi|A76_1810|1687763_1688035|91aa@	c9|KW10_1136|91518_92249|244aa	gi|KW2_0684|714909_715613|235aa	c3|N41_2267|62280_62990|237aa	c1|V4_0483|97124_97834|237aa	c2|NCDO763_1385|44366_45076|237aa	gi|MG1363_1868|1777419_1778129|237aa		c7|ATCC19435_2067|13202_13927|242aa	c9|E34_1141|77317_78042|242aa	c7|KF134_0769|13179_13883|235aa	c6|KF146_2000|13208_13933|242aa	c8|KF196_0011|13156_13881|242aa	c8|KF201_0010|13136_13861|242aa	c4|KF282_1589|59317_60057|247aa	c3|K231_1281|95665_96393|243aa	c3|KF24_2306|60247_60948|234aa	c7|K337_0757|98306_99031|242aa	c5|KF67_1078|13159_13884|242aa	c10|KF7_2125|13158_13880|241aa	c6|Li1_1055|100585_101307|241aa	c4|LMG14418_0822|48556_49281|242aa	c10|LMG8520_2468|47464_47937|158aa@c10|LMG8520_2467|47307_47441|45aa	c5|LMG8526_2071|97566_98270|235aa	c3|LMG9446_2183|82665_83390|242aa	c1|LMG9449_0234|92458_93183|242aa	c7|M20_2204|83139_83864|242aa	c4|ML8_1788|64336_64953|206aa@	c6|N42_1955|13129_13854|242aa	c11|AM2_0834|13223_13948|242aa	c6|UC317_1662|21984_22601|206aa@	gi|KLDS_0797|775902_776606|235aa	gi|IL1403_0820|770979_771704|242aa	gi|IO1_0724|742312_743016|235aa	gi|CV56_0781|758195_758791|199aa@
OG_154	FIG00755804: hypothetical protein	13	c60|FG2_1375|12729_15440|904aa	c111|HP_0279|79_2790|904aa	c106|LMG6897_2405|79_2790|904aa	c5|B40_1041|16377_19103|909aa	gi|UC5099_1646|1549636_1551606|657aa@	c47|DRA4_0572|2342_5395|1018aa	c47|SK110_0539|2342_5395|1018aa	gi|SK11_1753|1631621_1634674|1018aa	gi|A76_0887|838765_841818|1018aa	c2|KW10_0313|160768_163824|1019aa	gi|KW2_1573|1660626_1663703|1026aa	c5|N41_1974|86796_89861|1022aa	c15|V4_1330|17909_18031|41aa@c15|V4_1331|18095_18652|186aa@c15|V4_1332|18991_19758|256aa@ c15|V4_1329|17185_17979|265aa@c15|V4_1333|19854_20096|81aa	c8|NCDO763_0021|17768_20833|1022aa	gi|MG1363_0903|847112_850345|1078aa	c1|P7266_1056|38758_40425|556aa@	c24|ATCC19435_2028|19552_20862|437aa@	c1|E34_0608|239046_242258|1071aa	c12|KF134_2332|24870_26051|394aa@c12|KF134_2331|22840_24861|674aa	c0|KF146_1547|57658_58839|394aa@ c0|KF146_1546|55769_57649|627aa@	c12|KF196_2243|40210_41391|394aa@ c12|KF196_2244|41400_43421|674aa@	c10|KF201_2150|24640_27840|1067aa	c9|KF282_0828|271_1623|451aa@	c21|K231_2096|15169_16485|439aa@	c20|KF24_0127|31667_32983|439aa@	c12|K337_2238|40269_43481|1071aa	c16|KF67_1208|40208_41389|394aa@ c16|KF67_1209|41398_43419|674aa@	c4|KF7_0795|29619_32432|938aa@c4|KF7_0794|29226_29528|101aa@	c20|Li1_0124|16405_17727|441aa		c39|LMG8520_2666|13297_16107|937aa	c6|LMG8526_1944|144427_147627|1067aa	c7|LMG9446_2080|82233_85439|1069aa	c15|LMG9449_0627|44434_45750|439aa	c18|M20_1356|11370_14570|1067aa	c0|ML8_0532|30209_33145|979aa	c13|N42_1656|21119_22054|312aa@ c13|N42_1655|18854_20869|672aa@	c0|AM2_0966|69528_72458|977aa	c0|UC317_0979|91063_93993|977aa	gi|KLDS_1795|1766030_1768954|975aa	gi|IL1403_1749|1658711_1661929|1073aa	gi|IO1_1606|1688761_1691940|1060aa	gi|CV56_1622|1587261_1590191|977aa
OG_115	N-acetylmuramoyl-L-alanine amidase (EC3.5.1.28)	13	c8|FG2_1439|308_1294|329aa@	c0|HP_0544|6608_7699|364aa@	c0|LMG6897_0546|31040_32131|364aa@	c16|B40_2207|24_1217|398aa@	gi|UC5099_0223|220218_221288|357aa@ gi|UC5099_0220|218174_218962|263aa@	c0|DRA4_1016|33031_33750|240aa@c0|DRA4_1017|33740_34363|208aa	c0|SK110_1029|97407_98126|240aa@ c0|SK110_1028|96794_97417|208aa@	gi|SK11_0217|209247_209966|240aa@gi|SK11_0216|208634_209257|208aa	gi|A76_0267|259859_260548|230aa@ gi|A76_0266|259172_259792|207aa@	c6|KW10_1656|35352_37433|694aa	gi|KW2_0200|205908_207206|433aa	c1|N41_0281|94500_95798|433aa	c12|V4_2512|65132_66511|460aa	c19|NCDO763_0320|6722_7915|398aa	gi|MG1363_0233|218798_219991|398aa	c6|P7266_0845|99524_100822|433aa	c0|ATCC19435_0933|56612_57982|457aa	c2|E34_0186|52565_53941|459aa	c3|KF134_1358|57710_59479|590aa	c2|KF146_0273|132200_133120|307aa@c2|KF146_0272|131631_131960|110aa	c14|KF196_2340|50662_51585|308aa@c14|KF196_2341|51830_52366|179aa@	c2|KF201_0149|635_2707|691aa	c1|KF282_0438|76650_78029|460aa	c0|K231_1637|266801_268171|457aa	c0|KF24_1088|136850_138220|457aa	c1|K337_0358|45_1427|461aa	c2|KF67_0332|118446_120413|656aa	c7|KF7_0684|55478_56860|461aa	c0|Li1_1953|186101_187471|457aa	c3|LMG14418_2133|50296_51651|452aa	c5|LMG8520_1834|66629_68005|459aa	c3|LMG8526_1296|16666_18087|474aa	c0|LMG9446_0965|124821_126524|568aa	c0|LMG9449_1193|267303_268673|457aa	c2|M20_1402|18494_20353|620aa	c11|ML8_0446|16783_18855|691aa	c7|N42_2152|39_182|48aa	c6|AM2_1601|54_197|48aa@	c8|UC317_0021|16788_18860|691aa	gi|KLDS_0271|260344_261765|474aa	gi|IL1403_0246|220391_220903|171aa@	gi|IO1_0193|196874_198253|460aa	gi|CV56_0241|206588_208555|656aa
OG_529	FIG00755706: hypothetical protein	13	c17|FG2_1631|4782_5237|152aa@c17|FG2_1630|4493_4798|102aa@	c15|HP_0386|23170_23625|152aa@c15|HP_0387|23609_23914|102aa@	c20|LMG6897_0047|23170_23625|152aa@c20|LMG6897_0048|23609_23914|102aa@	c51|B40_0469|4785_5240|152aa@c51|B40_0468|4494_4772|93aa@	gi|UC5099_0574|551580_552035|152aa@gi|UC5099_0573|551291_551596|102aa@	c28|DRA4_2325|23590_24045|152aa@c28|DRA4_2326|24029_24334|102aa	c30|SK110_1906|23502_23957|152aa@c30|SK110_1907|23941_24246|102aa@	gi|SK11_0559|528373_528828|152aa@gi|SK11_0558|528084_528389|102aa	gi|A76_2057|1907685_1908140|152aa@gi|A76_2058|1908124_1908429|102aa@	c4|KW10_0868|168742_169485|248aa	gi|KW2_0493|509984_510727|248aa	c9|N41_1610|4073_4816|248aa	c11|V4_1762|78558_79301|248aa	c31|NCDO763_2240|4466_5209|248aa	gi|MG1363_0540|521309_522052|248aa	c3|P7266_0149|38245_38997|251aa	c19|ATCC19435_0400|4505_5248|248aa	c4|E34_0793|4505_5248|248aa	c21|KF134_2220|4464_5033|190aa@c21|KF134_2219|4289_4453|55aa	c9|KF146_1133|4534_5277|248aa	c5|KF196_2063|119925_120668|248aa	c6|KF201_1914|143316_144059|248aa	c7|KF282_1424|4082_4825|248aa	c24|K231_2229|4505_5248|248aa	c50|KF24_1823|4507_5250|248aa	c9|K337_1086|4505_5212|236aa	c39|KF67_2656|4561_5130|190aa@c39|KF67_2657|5141_5305|55aa@	c6|KF7_1796|4505_5248|248aa	c26|Li1_1544|4573_5316|248aa	c95|LMG14418_1404|4504_5247|248aa	c4|LMG8520_0841|81445_82188|248aa	c7|LMG8526_0864|153145_153888|248aa	c25|LMG9446_2283|4679_5248|190aa@c25|LMG9446_2282|4504_4668|55aa	c3|LMG9449_2331|4505_5248|248aa	c53|M20_0721|4505_5248|248aa	c6|ML8_2194|78244_78987|248aa	c8|N42_0003|4504_5247|248aa	c5|AM2_1778|79639_80382|248aa	c22|UC317_0319|29007_29750|248aa	gi|KLDS_0595|569015_569758|248aa	gi|IL1403_0596|547458_548201|248aa	gi|IO1_0467|480495_481055|187aa@gi|IO1_0468|481106_481237|44aa	gi|CV56_0513|480478_481221|248aa
OG_140	Uncharacterized threonine-rich protein C1742.01precursor	13	c7|FG2_2490|29543_31228|562aa@c7|FG2_2492|31900_32949|350aa@c7|FG2_2491|31323_31898|192aa@	c3|HP_1215|2622_4307|562aa@c3|HP_1213|901_1950|350aa@c3|HP_1214|1952_2527|192aa@	c4|LMG6897_1749|2590_4275|562aa@c4|LMG6897_1747|869_1918|350aa@c4|LMG6897_1748|1920_2495|192aa@	c6|B40_2160|2590_4275|562aa@c6|B40_2158|869_1918|350aa@c6|B40_2159|1920_2495|192aa@	gi|UC5099_0804|756065_757750|562aa@gi|UC5099_0803|754447_755970|508aa	c11|DRA4_0918|2588_4273|562aa@c11|DRA4_0917|869_2275|469aa	c13|SK110_1528|2396_4273|626aa@c13|SK110_1527|869_2275|469aa	gi|SK11_0792|748792_750648|619aa@gi|SK11_0791|747244_748650|469aa	gi|A76_1815|1691771_1693456|562aa@gi|A76_1816|1693569_1695176|536aa	c9|KW10_1139|95604_99182|1193aa	gi|KW2_0681|708236_711616|1127aa	c3|N41_2272|66283_69807|1175aa	c1|V4_0480|90376_93831|1152aa	c2|NCDO763_1382|37546_41073|1176aa	gi|MG1363_1871|1781422_1784949|1176aa		c7|ATCC19435_2064|6335_9877|1181aa	c9|E34_1144|81365_84907|1181aa	c7|KF134_0766|6293_9835|1181aa	c6|KF146_1997|7294_9885|864aa@ c6|KF146_1996|6338_7285|316aa@	c8|KF196_0007|6291_9476|1062aa@c8|KF196_0008|9546_9833|96aa@	c8|KF201_0007|6272_9814|1181aa	c4|KF282_1586|51846_56021|1392aa	c3|K231_1284|99716_103258|1181aa	c3|KF24_2303|53361_56903|1181aa	c7|K337_0760|102354_105896|1181aa	c5|KF67_1075|6294_9836|1181aa	c10|KF7_2121|6294_9038|915aa@c10|KF7_2122|9090_9458|123aa@	c6|Li1_1058|104630_108178|1183aa	c4|LMG14418_0825|52604_56146|1181aa	c10|LMG8520_2471|51256_52005|250aa@ c10|LMG8520_2475|54186_54680|165aa@c10|LMG8520_2473|52749_53837|363aa	c5|LMG8526_2068|90663_94247|1195aa	c3|LMG9446_2180|75800_79342|1181aa	c1|LMG9449_0237|96506_100048|1181aa	c7|M20_2207|87187_90729|1181aa	c4|ML8_1791|68276_71713|1146aa	c6|N42_1952|6265_9807|1181aa	c11|AM2_0830|6359_9901|1181aa	c6|UC317_1659|15116_18661|1182aa	gi|KLDS_0794|769016_772558|1181aa	gi|IL1403_0817|764114_767656|1181aa	gi|IO1_0721|735319_738990|1224aa	gi|CV56_0778|751306_754851|1182aa
OG_2249	hypothetical protein	13	c98|FG2_2452|9638_9862|75aa@	c90|HP_0659|9638_9862|75aa@	c87|LMG6897_2321|221_445|75aa@	c221|B40_1998|221_445|75aa@	gi|UC5099_1672|1576698_1576922|75aa@	c57|DRA4_0746|13421_13645|75aa@	c57|SK110_0703|13421_13645|75aa@	gi|SK11_1777|1660776_1661000|75aa@	gi|A76_0864|813602_813826|75aa@		gi|KW2_1596|1688813_1689037|75aa@	c5|N41_1951|60862_61284|141aa	c15|V4_1356|45178_45402|75aa@	c8|NCDO763_0045|46345_46767|141aa	gi|MG1363_0879|821178_821600|141aa																	c12|LMG8526_2313|12782_12949|56aa@			c43|M20_1541|4045_4353|103aa@
OG_1149	Transporter	12	c25|FG2_2617|11807_12607|267aa@c25|FG2_2618|12589_12714|42aa	c37|HP_0250|11807_12607|267aa@c37|HP_0251|12589_12714|42aa	c36|LMG6897_0012|11807_12607|267aa@c36|LMG6897_0013|12589_12714|42aa	c29|B40_0740|11808_12632|275aa@c29|B40_0741|12589_12714|42aa	gi|UC5099_1998|1896465_1897373|303aa	c33|DRA4_0513|11871_12779|303aa	c35|SK110_1656|11806_12714|303aa	gi|SK11_2215|2055265_2056173|303aa	gi|A76_2219|2050629_2051429|267aa@gi|A76_2218|2050522_2050638|39aa	c1|KW10_0345|12510_13418|303aa	gi|KW2_1976|2070752_2071660|303aa	c2|N41_1474|112512_113420|303aa	c6|V4_0893|12524_13432|303aa	c15|NCDO763_0626|40410_41318|303aa	gi|MG1363_2264|2151214_2152122|303aa	c4|P7266_1556|13017_13925|303aa	c9|ATCC19435_1594|12164_13039|292aa	c5|E34_2135|193275_194183|303aa	c16|KF134_1879|12138_13013|292aa	c11|KF146_1062|12137_13012|292aa	c3|KF196_1207|12138_13046|303aa	c17|KF201_1746|12142_13050|303aa	c2|KF282_0170|12161_13036|292aa	c2|K231_0191|12001_12909|303aa	c1|KF24_0143|12147_13022|292aa	c3|K337_1193|12171_13079|303aa	c7|KF67_1476|12142_13050|303aa	c3|KF7_1228|12138_12854|239aa@c3|KF7_1229|12854_13012|53aa@	c2|Li1_0162|12142_13050|303aa	c35|LMG14418_1562|12117_12992|292aa	c8|LMG8520_0003|1442_2158|239aa@c8|LMG8520_0004|2158_2349|64aa@	c2|LMG8526_0179|12189_13064|292aa	c2|LMG9446_1270|12127_13002|292aa	c8|LMG9449_0014|12143_13051|303aa	c31|M20_2391|12165_13040|292aa	c9|ML8_0917|12122_12838|239aac9|ML8_0918|12838_13029|64aa@	c3|N42_2273|12140_13015|292aa	c30|AM2_1862|12119_12835|239aa@c30|AM2_1863|12835_12993|53aa	c10|UC317_2352|12119_12829|237aa@c10|UC317_2353|12835_12993|53aa@	gi|KLDS_2199|2156805_2157713|303aa	gi|IL1403_2077|1998375_1999091|239aa@gi|IL1403_2078|1999091_1999282|64aa@	gi|IO1_2009|2088243_2089151|303aa	gi|CV56_2029|1976026_1976742|239aa@gi|CV56_2030|1976742_1976900|53aa@
OG_46	Collagen adhesion protein	12	c55|FG2_0417|10399_15804|1802aa	c0|HP_0622|78132_83537|1802aa	c0|LMG6897_0624|102564_107969|1802aa	c0|B40_0622|63871_66996|1042aa@ c0|B40_0623|67240_69285|682aa@	gi|UC5099_0141|137562_142406|1615aa	c0|DRA4_1091|105051_110465|1805aa	c0|SK110_0953|20692_26106|1805aa	gi|SK11_0141|132531_137945|1805aa	gi|A76_0184|175733_181147|1805aa	c6|KW10_1736|115039_121020|1994aa	gi|KW2_0128|128961_134945|1995aa	c1|N41_0213|28926_30326|467aa@	c22|V4_0566|92_1498|469aa@c22|V4_0567|1697_2287|197aa@	c4|NCDO763_0758|57845_59245|467aa@	gi|MG1363_0163|152726_154126|467aa@		c11|ATCC19435_0806|10126_16077|1984aa	c2|E34_0268|138112_144057|1982aa	c3|KF134_1447|143837_149788|1984aa	c2|KF146_0176|34927_40878|1984aa	c10|KF196_2111|74_679|202aa@	c3|KF201_1365|108277_113943|1889aa	c5|KF282_1117|7379_13324|1982aa	c8|K231_0011|10124_16075|1984aa	c0|KF24_1005|56644_62310|1889aa	c4|K337_0839|70442_76393|1984aa	c11|KF67_1746|11367_17318|1984aa	c5|KF7_1946|30902_34018|1039aa@ c5|KF7_1947|34032_34232|67aa@	c0|Li1_1881|113427_119378|1984aa	c14|LMG14418_2426|30605_36556|1984aa	c33|LMG8520_0485|373_3534|1054aa@ c33|LMG8520_0486|3575_5749|725aa@	c3|LMG8526_1388|104798_110749|1984aa	c15|LMG9446_0563|26375_31381|1669aa	c0|LMG9449_1264|335398_339756|1453aa@c0|LMG9449_1265|339810_341348|513aa	c2|M20_1478|91535_95893|1453aa@ c2|M20_1479|95947_97485|513aa@	c2|ML8_0758|10125_16076|1984aa	c7|N42_2226|69741_74099|1453aa@ c7|N42_2227|74153_75691|513aa@	c6|AM2_1676|69607_75558|1984aa	c16|UC317_1852|19286_23257|1324aa@ c16|UC317_1853|23306_25237|644aa@	gi|KLDS_0196|184957_190908|1984aa	gi|IL1403_0172|148795_154746|1984aa	gi|IO1_0114|115577_121522|1982aa	gi|CV56_0167|130314_136265|1984aa
OG_2012	collagen adhesin precursor	12																	c4|ATCC19435_0704|87809_88108|100aa@c4|ATCC19435_0705|88162_89262|367aa	c4|E34_0921|136121_137575|485aa	c6|KF134_2106|3124_4578|485aa	c12|KF146_2381|31035_32489|485aa	c5|KF196_1951|3129_4583|485aa	c6|KF201_1797|19307_20407|367aa@c6|KF201_1798|20461_20760|100aa@	c18|KF282_0152|31707_33161|485aa	c6|K231_1861|106350_107804|485aa	c5|KF24_1903|2907_4361|485aa	c15|K337_2369|3123_4226|368aa@c15|K337_2370|4280_4579|100aa	c21|KF67_2364|31123_32493|457aa	c6|KF7_1911|121138_122592|485aa	c4|Li1_1434|36300_37754|485aa	c69|LMG14418_0763|2598_3602|335aa@c69|LMG14418_0764|3599_3844|82aa@	c20|LMG8520_0170|32542_33996|485aa	c7|LMG8526_0750|35903_37357|485aa	c6|LMG9446_1835|9156_10610|485aa	c3|LMG9449_2449|123206_124306|367aa@c3|LMG9449_2448|122853_123152|100aa	c4|M20_0747|21657_22757|367aa@c4|M20_0748|22811_23110|100aa@	c7|ML8_2327|42446_43456|337aa@c7|ML8_2328|43453_43698|82aa@	c5|N42_1922|77071_78423|451aa	c14|AM2_2471|25564_25809|82aa@c14|AM2_2470|24557_25567|337aa@c14|AM2_2469|24356_24490|45aa	c14|UC317_2551|42445_43455|337aa@c14|UC317_2552|43452_43697|82aa@	gi|KLDS_0713|684390_685394|335aa@gi|KLDS_0712|684148_684393|82aa@	gi|IL1403_0737|683636_684646|337aa@gi|IL1403_0736|683394_683639|82aa@	gi|IO1_0577|593260_594714|485aa	gi|CV56_0632|598633_599643|337aa@gi|CV56_0631|598391_598636|82aa@gi|CV56_0633|599710_599844|45aa@
OG_1958	hypothetical protein	12										c18|KW10_0162|34542_36014|491aa@							c21|ATCC19435_1228|31410_32888|493aa@		c0|KF134_1545|161_1726|522aa@c8|KF134_0086|97524_98963|480aa	c1|KF146_0430|202_1767|522aa@c1|KF146_0431|1983_2108|42aa@c7|KF146_0828|97568_99007|480aa@	c4|KF196_0958|216363_217928|522aa@c9|KF196_1193|97569_99008|480aa@			c5|K231_1981|103689_105482|598aa@	c10|KF24_2473|2372_5290|973aa		c9|KF67_0891|83136_84701|522aa@c6|KF67_1068|97580_99019|480aa@	c1|KF7_0504|179557_180963|469aa@	c3|Li1_1640|25690_26727|346aa@	c17|LMG14418_0373|17420_21745|1442aa						c22|ML8_1533|12858_17219|1454aa	c4|N42_0733|29507_34054|1516aa@c4|N42_0734|34508_34633|42aa	c2|AM2_1362|102751_103065|105aa@	c2|UC317_1376|96223_100548|1442aa	gi|KLDS_1565|1554032_1558357|1442aa	gi|IL1403_1579|1484512_1488837|1442aa	gi|IO1_1434|1498602_1506566|2655aa	gi|CV56_1453|1419423_1419668|82aa@
OG_18	Co-activator of prophage gene expression IbrA	12	c6|FG2_2222|17561_18109|183aa@c6|FG2_2223|18184_18492|103aa@c6|FG2_2224|18641_18757|39aa@	c8|HP_1421|17561_18109|183aa@c8|HP_1422|18184_18492|103aa@c8|HP_1423|18467_18757|97aa@	c10|LMG6897_1302|17561_18109|183aa@c10|LMG6897_1303|18184_18492|103aa@c10|LMG6897_1304|18641_18757|39aa@	c69|B40_0488|237_785|183aa@c69|B40_0489|860_1168|103aa@c69|B40_0490|1143_1433|97aa@	gi|UC5099_1204|1133546_1134097|184aa@gi|UC5099_1205|1134172_1134750|193aa@	c5|DRA4_1795|17548_18096|183aa@c5|DRA4_1796|18171_18749|193aa	c29|SK110_1230|11058_11606|183aa@c29|SK110_1229|10405_10983|193aa@	gi|SK11_1254|1162948_1163496|183aa@gi|SK11_1255|1163571_1164149|193aa	gi|A76_1260|1167804_1168355|184aa@gi|A76_1261|1168430_1169008|193aa@	c3|KW10_1280|134685_136004|440aa	gi|KW2_1070|1115193_1116395|401aa	c13|N41_1582|44216_45418|401aa@	c3|V4_1828|58273_59475|401aa	c14|NCDO763_2493|16094_17296|401aa	gi|MG1363_1472|1387504_1388706|401aa		c3|ATCC19435_2244|85491_86828|446aa	c8|E34_0081|79255_80457|401aa	c2|KF134_0156|30191_31510|440aa	c3|KF146_1447|220638_221957|440aa	c1|KF196_0612|218036_219355|440aa	c0|KF201_1474|30611_31813|401aa	c0|KF282_2039|118830_120167|446aa	c1|K231_0434|30145_31464|440aa	c22|KF24_0384|30190_31527|446aa	c0|K337_1514|115739_117076|446aa	c1|KF67_0456|46829_48166|446aa	c0|KF7_1642|229610_230929|440aa	c1|Li1_0626|226761_228098|446aa	c39|LMG14418_2391|20674_21993|440aa	c1|LMG8520_0240|61565_62305|247aa@c1|LMG8520_0241|62353_62640|96aa@	c0|LMG8526_1578|68618_69937|440aa	c1|LMG9446_0339|202743_204062|440aa	c13|LMG9449_1735|51879_53198|440aa	c19|M20_0379|216_1418|401aa	c26|ML8_1849|31347_32666|440aa	c0|N42_1167|235725_237044|440aa	c7|AM2_1975|8386_9705|440aa	c3|UC317_2180|31346_32665|440aa	gi|KLDS_1195|1154039_1155241|401aa	gi|IL1403_1225|1151393_1152595|401aa	gi|IO1_1083|1109792_1111111|440aa	gi|CV56_1184|1136442_1137449|336aa@gi|CV56_1183|1136249_1136389|47aa@
OG_1144	Manganese transport protein MntH	12	c25|FG2_2628|20040_21020|327aa@	c103|HP_2297|1791_2771|327aa@c103|HP_2298|2928_3053|42aa@	c100|LMG6897_1065|1791_2771|327aa@c100|LMG6897_1066|2928_3053|42aa@	c29|B40_0751|20036_21016|327aa@c29|B40_0752|21173_21298|42aa@	gi|UC5099_1990|1888217_1889146|310aa@	c33|DRA4_0523|20102_21082|327aa@c33|DRA4_0524|21239_21364|42aa	c35|SK110_1666|20037_21017|327aa@c35|SK110_1667|21174_21299|42aa@	gi|SK11_2204|2046962_2047942|327aa@gi|SK11_2203|2046680_2046805|42aa	gi|A76_2209|2042219_2043199|327aa@gi|A76_2208|2041937_2042062|42aa@	c1|KW10_0337|3917_5179|421aa	gi|KW2_1968|2062166_2063428|421aa	c53|N41_0741|981_2243|421aa	c6|V4_0885|3936_5198|421aa	c59|NCDO763_1301|3924_5186|421aa	gi|MG1363_2251|2139888_2141150|421aa	c4|P7266_1546|3681_4931|417aa	c9|ATCC19435_1585|3772_5034|421aa	c5|E34_2143|201309_202571|421aa	c16|KF134_1871|3751_5013|421aa	c11|KF146_1053|3751_5013|421aa	c3|KF196_1199|3751_5013|421aa	c17|KF201_1738|3751_5013|421aa	c2|KF282_0161|3753_5015|421aa	c2|K231_0183|3772_5034|421aa	c1|KF24_0135|3750_5012|421aa	c3|K337_1185|3768_5030|421aa	c7|KF67_1468|3755_5017|421aa	c3|KF7_1220|3751_5013|421aa	c2|Li1_0154|3750_5012|421aa	c35|LMG14418_1553|3732_4748|339aa@	c59|LMG8520_1306|5896_7158|421aa	c2|LMG8526_0171|3782_5044|421aa	c2|LMG9446_1262|3737_4999|421aa	c8|LMG9449_0006|3750_5012|421aa	c31|M20_2383|3774_5036|421aa	c9|ML8_0909|3736_4998|421aa	c3|N42_2264|3755_5017|421aa	c30|AM2_1854|3733_4995|421aa	c10|UC317_2344|3733_4995|421aa	gi|KLDS_2191|2148419_2149681|421aa	gi|IL1403_2069|1990598_1991251|218aa@gi|IL1403_2068|1989989_1990543|185aa@	gi|IO1_2001|2079841_2081103|421aa	gi|CV56_2021|1967923_1968903|327aa@gi|CV56_2020|1967641_1967778|46aa@
OG_1696	Cell wall surface anchor family protein, FPXTGmotif	12											gi|KW2_2085|2173062_2177462|1467aa	c2|N41_1363|5539_9873|1445aa	c6|V4_1002|116082_120416|1445aa	c3|NCDO763_2186|61712_66046|1445aa	gi|MG1363_2397|2272997_2277331|1445aa		c5|ATCC19435_1833|83243_84253|337aa@c5|ATCC19435_1832|82948_83229|94aa	c5|E34_2026|82333_86685|1451aa	c5|KF134_2007|112678_117018|1447aa	c4|KF146_0890|56691_61043|1451aa	c3|KF196_1350|144715_149067|1451aa	c4|KF201_0949|82326_86678|1451aa	c2|KF282_0283|121012_123378|789aa@ c2|KF282_0284|123553_125364|604aa@	c2|K231_0330|138925_139548|208aa@ c2|K231_0332|139948_140223|92aa@	c1|KF24_0280|139052_139987|312aa@ c1|KF24_0281|140075_140356|94aa@	c3|K337_1303|119592_121958|789aa@c3|K337_1304|122081_123943|621aa	c14|KF67_2650|59907_63308|1134aa@ c14|KF67_2651|63323_64258|312aa@	c3|KF7_1346|126700_129297|866aa@	c2|Li1_0300|140916_141926|337aa@ c2|Li1_0301|141940_142221|94aa@	c54|LMG14418_1957|382_4734|1451aa	c0|LMG8520_1013|33221_33391|57aac0|LMG8520_1014|33515_33877|121aa@@c0|LMG8520_1016|35105_36139|345aa@ c0|LMG8520_1017|36227_36520|98aa@ c0|LMG8520_1012|32162_33103|314aa@c0|LMG8520_1015|33974_34777|268aa@		c2|LMG9446_1384|120975_125327|1451aa	c14|LMG9449_2785|49968_50978|337aa@c14|LMG9449_2784|49673_49954|94aa	c61|M20_1203|1252_5604|1451aa	c10|ML8_1321|19053_22898|1282aa@ c10|ML8_1322|23008_23355|116aa	c3|N42_2387|121419_125771|1451aa		c15|UC317_0610|19055_22900|1282aa@c15|UC317_0611|23010_23357|116aa	gi|KLDS_2336|2280510_2284862|1451aa	gi|IL1403_2219|2123945_2128297|1451aa	gi|IO1_2118|2195138_2199496|1453aa	gi|CV56_2145|2084748_2089049|1434aa
OG_1571	transcription regulator	12	c81|FG2_2315|416_1021|202aa@	c7|HP_2346|31020_31625|202aa@	c9|LMG6897_0979|31220_31648|143aa@c9|LMG6897_0978|31020_31223|68aa	c18|B40_0811|31019_31624|202aa@	gi|UC5099_2236|2101222_2101827|202aa@	c32|DRA4_1274|24382_24987|202aa@	c34|SK110_1157|24382_24987|202aa@	gi|SK11_2476|2276707_2277312|202aa@	gi|A76_2490|2286932_2287537|202aa@	c1|KW10_0550|197834_198757|308aa	gi|KW2_2195|2270072_2270995|308aa		c10|V4_2303|98_1021|308aa			c0|P7266_0525|237883_238806|308aa	c5|ATCC19435_1732|97_1020|308aa	c5|E34_1930|97_1020|308aa	c5|KF134_2102|198288_199211|308aa	c4|KF146_0985|142313_143236|308aa	c3|KF196_1445|230336_231259|308aa	c4|KF201_0850|547_1020|158aa@c4|KF201_0849|97_357|87aa@	c20|KF282_0097|100_1023|308aa	c15|K231_2281|97_1020|308aa	c14|KF24_2593|97_1020|308aa	c3|K337_1401|205153_206076|308aa	c23|KF67_2303|97_1020|308aa	c15|KF7_2327|100_1023|308aa	c2|Li1_0400|224141_225064|308aa	c18|LMG14418_1264|97_1020|308aa	c0|LMG8520_1114|117595_118518|308aa	c21|LMG8526_2186|97_1020|308aa	c2|LMG9446_1479|206593_207453|287aa	c19|LMG9449_0350|97_1020|308aa	c8|M20_0100|80993_81838|282aa	c21|ML8_1921|34595_35485|297aa	c21|N42_1306|34215_35138|308aa	c24|AM2_1888|97_1020|308aa	c28|UC317_2304|25740_26630|297aa	gi|KLDS_2481|2401261_2401986|242aa@gi|KLDS_2482|2401970_2402185|72aa@	gi|IL1403_2325|2217579_2218112|178aa@ gi|IL1403_2320|2214455_2214865|137aa@	gi|IO1_2216|2280782_2281705|308aa	gi|CV56_2294|2206959_2207849|297aa
OG_1485	FIG00755482: hypothetical protein	12	c22|FG2_1545|21767_22894|376aa@c22|FG2_1546|22885_23172|96aa@	c6|HP_2092|3213_4340|376aa@c6|HP_2091|2935_3222|96aa@	c2|LMG6897_0796|3213_4340|376aa@c2|LMG6897_0795|2935_3222|96aa@	c2|B40_0816|3140_4267|376aa@c2|B40_0815|2862_3149|96aa@	gi|UC5099_0411|399355_399957|201aa@gi|UC5099_0409|398550_398804|85aa@gi|UC5099_0410|398828_399316|163aa@	c21|DRA4_1220|3209_4342|378aa@c21|DRA4_1219|2931_3218|96aa	c5|SK110_1760|3209_4342|378aa@c5|SK110_1759|2931_3218|96aa@	gi|SK11_0424|398329_399462|378aa@gi|SK11_0423|398051_398338|96aa	gi|A76_0446|428060_429193|378aa@gi|A76_0445|427782_428069|96aa@	c0|KW10_1430|117555_118958|468aa	gi|KW2_0370|378270_379676|469aa	c11|N41_0905|9457_10398|314aa@c11|N41_0904|8993_9454|154aa@	c0|V4_2044|136900_138306|469aa	c0|NCDO763_0969|81340_82467|376aa	gi|MG1363_0411|390038_391165|376aa@	c0|P7266_0423|124681_126087|469aa	c0|ATCC19435_1097|218291_219694|468aa	c3|E34_1250|101816_103219|468aa	c4|KF134_0953|99318_100721|468aa	c5|KF146_2153|71391_72794|468aa	c2|KF196_0295|141804_143207|468aa	c2|KF201_0312|162971_164374|468aa	c1|KF282_0604|241638_243041|468aa	c0|K231_1466|99338_100741|468aa	c13|KF24_1710|2779_4182|468aa	c1|K337_0521|161478_162881|468aa	c4|KF67_1611|52104_53507|468aa	c2|KF7_0249|101530_102933|468aa	c0|Li1_2114|344324_345727|468aa	c20|LMG14418_0074|2787_4190|468aa	c9|LMG8520_1611|11856_12497|214aa@c9|LMG8520_1612|12518_12679|54aa@c9|LMG8520_1613|12666_13265|200aa@	c10|LMG8526_2194|2774_4177|468aa	c4|LMG9446_0691|99361_100764|468aa	c0|LMG9449_1029|109979_111382|468aa	c6|M20_1917|2785_4188|468aa	c3|ML8_1294|84107_85510|468aa	c1|N42_0315|158364_159767|468aa	c9|AM2_1505|8901_10304|468aa	c5|UC317_1727|1898_3301|468aa	gi|KLDS_0453|430909_432312|468aa	gi|IL1403_0419|384568_385971|468aa	gi|IO1_0364|368022_369440|473aa	gi|CV56_0411|369644_371047|468aa
OG_128	PTS system, sucrose-specific IIB component (EC2.7.1.69) / PTS system, sucrose-specific IIC component(EC 2.7.1.69)	11	c6|FG2_2214|11643_13595|651aa	c8|HP_1413|11643_13595|651aa	c10|LMG6897_1294|11643_13595|651aa	c52|B40_0447|4616_5728|371aa@c52|B40_0446|3776_4591|272aa@	gi|UC5099_1198|1127678_1129630|651aa	c5|DRA4_1788|11645_13582|646aa	c29|SK110_1237|15572_17509|646aa	gi|SK11_1247|1157045_1158982|646aa	gi|A76_1251|1161889_1163010|374aa@gi|A76_1252|1163026_1163841|272aa@	c3|KW10_1286|139864_141816|651aa	gi|KW2_1064|1109275_1111227|651aa	c13|N41_1589|49384_51336|651aa	c3|V4_1835|63441_65393|651aa	c14|NCDO763_2486|10167_12119|651aa	gi|MG1363_1479|1392681_1394633|651aa	c12|P7266_1479|15835_17787|651aa	c3|ATCC19435_2250|90553_92493|647aa	c8|E34_0076|73381_75333|651aa	c2|KF134_0161|35315_37267|651aa	c3|KF146_1442|215673_216833|387aa@ c3|KF146_1441|214881_215612|244aa@	c1|KF196_0607|212279_214231|651aa	c0|KF201_1480|35735_37687|651aa	c0|KF282_2044|124011_125963|651aa	c1|K231_0440|35269_37221|651aa	c2|KF24_1640|176800_178752|651aa	c0|K337_1519|120863_122815|651aa	c1|KF67_0461|51952_53904|651aa	c0|KF7_1637|224423_225748|442aa@ c0|KF7_1636|223796_224314|173aa@	c1|Li1_0621|221022_222974|651aa	c87|LMG14418_2043|2126_4078|651aa	c1|LMG8520_0233|56326_57210|295aa@c1|LMG8520_0234|57378_57650|91aa@	c0|LMG8526_1572|62806_64758|651aa	c1|LMG9446_0334|196986_198938|651aa	c9|LMG9449_1743|3675_5525|617aa	c10|M20_2532|60886_62838|651aa	c18|ML8_0742|31861_33225|455aa@c18|ML8_0743|33310_33813|168aa@	c0|N42_1162|230761_231921|387aa@ c0|N42_1161|229969_230709|247aa@	c7|AM2_1981|14098_15462|455aa@c7|AM2_1980|13510_14013|168aa	c3|UC317_2186|37058_38422|455aa@c3|UC317_2185|36470_36973|168aa@	gi|KLDS_1190|1148165_1150117|651aa	gi|IL1403_1219|1145519_1146883|455aa@gi|IL1403_1220|1146968_1147471|168aa@	gi|IO1_1078|1103979_1105931|651aa	gi|CV56_1177|1130375_1131739|455aa@gi|CV56_1178|1131824_1132327|168aa@
OG_1134	Diadenosine tetraphosphate (Ap4A) hydrolase andother HIT family hydrolases	11	c9|FG2_0952|7907_8275|123aa	c1|HP_0064|7907_8275|123aa	c1|LMG6897_0065|7907_8275|123aa	c3|B40_1251|17389_17757|123aa	gi|UC5099_2033|1927359_1927727|123aa	c1|DRA4_0143|10464_10832|123aa	c1|SK110_0205|61202_61570|123aa	gi|SK11_2253|2087177_2087545|123aa	gi|A76_2256|2082440_2082808|123aa	c1|KW10_0378|42009_42377|123aa	gi|KW2_2005|2099397_2099765|123aa	c2|N41_1444|83969_84337|123aa	c6|V4_0923|41607_41975|123aa	c15|NCDO763_0594|11868_12236|123aa	gi|MG1363_2295|2180297_2180665|123aa	c4|P7266_1582|37017_37385|123aa	c9|ATCC19435_1627|41794_42162|123aa	c5|E34_2104|164721_164951|77aa@c5|E34_2103|164582_164719|46aa@	c5|KF134_1928|33387_33755|123aa	c11|KF146_1094|41716_42084|123aa	c3|KF196_1239|41717_42085|123aa	c4|KF201_1031|164082_164450|123aa	c2|KF282_0202|41372_41602|77aa@	c2|K231_0223|41637_42005|123aa	c1|KF24_0175|41779_42147|123aa	c3|K337_1224|41452_41601|50aa@c3|K337_1225|41603_41740|46aa	c7|KF67_1508|41721_42089|123aa	c3|KF7_1261|41280_41510|77aa@c3|KF7_1262|41512_41649|46aa@	c2|Li1_0194|41776_42144|123aa	c29|LMG14418_1181|8330_8560|77aa@c29|LMG14418_1182|8562_8699|46aa@	c8|LMG8520_0036|30605_30973|123aa	c2|LMG8526_0208|39296_39664|123aa	c2|LMG9446_1303|41704_42072|123aa	c8|LMG9449_0049|41774_42142|123aa	c3|M20_2359|126072_126440|123aa	c9|ML8_0949|41262_41492|77aa@c9|ML8_0950|41494_41631|46aa@	c3|N42_2306|41718_42062|115aa	c1|AM2_0234|84227_84457|77aa@c1|AM2_0233|84088_84225|46aa	c10|UC317_2384|41259_41489|77aa@c10|UC317_2385|41491_41628|46aa@	gi|KLDS_2231|2185947_2186177|77aa@gi|KLDS_2232|2186179_2186316|46aa@	gi|IL1403_2133|2042003_2042233|77aa@gi|IL1403_2134|2042235_2042372|46aa@	gi|IO1_2040|2117399_2117767|123aa	gi|CV56_2061|2005166_2005396|77aa@gi|CV56_2062|2005398_2005535|46aa@
OG_1724	hypothetical protein	11	c3|FG2_1270|25075_25263|63aa	c2|HP_0813|29193_29381|63aa	c3|LMG6897_1243|29191_29379|63aa	c1|B40_0089|29827_30015|63aa	gi|UC5099_0314|301130_301318|63aa	c6|DRA4_1730|20099_20287|63aa	c6|SK110_1715|20099_20287|63aa	gi|SK11_0324|300203_300391|63aa	gi|A76_0345|328238_328426|63aa	c0|KW10_1513|206965_207249|95aa	gi|KW2_0287|288950_289240|97aa	c0|N41_1022|50933_51064|44aa@			gi|MG1363_0323|296663_296794|44aa@		c0|ATCC19435_1010|127658_127948|97aa	c3|E34_1337|193562_193732|57aa@ c3|E34_1338|193729_193851|41aa@	c4|KF134_1060|207743_208033|97aa	c2|KF146_0388|228541_228759|73aa	c2|KF196_0211|53782_54000|73aa	c2|KF201_0225|72477_72596|40aa@	c1|KF282_0514|148336_148626|97aa	c0|K231_1549|187679_187969|97aa	c0|KF24_1166|207855_208145|97aa	c1|K337_0436|71104_71274|57aa	c2|KF67_0251|48207_48425|73aa	c2|KF7_0165|13498_13716|73aa	c0|Li1_2031|257147_257437|97aa	c0|LMG14418_1009|70853_70990|46aa@	c23|LMG8520_1119|1307_1597|97aa		c0|LMG9446_0875|48251_48541|97aa	c0|LMG9449_1114|199152_199442|97aa	c1|M20_0264|65456_65746|97aa	c1|ML8_0140|78029_78166|46aa@	c1|N42_0232|71220_71510|97aa	c4|AM2_0775|78090_78227|46aa@	c1|UC317_0215|56348_56485|46aa@	gi|KLDS_0368|343879_344016|46aa@	gi|IL1403_0331|294964_295101|46aa@		gi|CV56_0327|282779_282916|46aa@
OG_25	Predicted cell-wall-anchored protein SasA(LPXTG motif)	11										c10|KW10_2066|113572_114774|401aa@							c6|ATCC19435_1978|105131_105682|184aa@		c8|KF134_0001|33_2453|807aa	c7|KF146_0743|33_2453|807aa	c9|KF196_1108|33_2453|807aa			c5|K231_1889|193_744|184aa@		c5|K337_1925|83_742|220aa@	c6|KF67_0983|28_2475|816aa	c1|KF7_0592|277364_279145|594aa@	c3|Li1_1734|129855_132284|810aa				c9|LMG9446_1636|94654_97101|816aa	c7|LMG9449_2309|102673_102942|90aa@	c88|M20_0434|1053_1322|90aa@	c83|ML8_1184|45_1388|448aa@	c4|N42_0828|136744_137295|184aa@	c3|AM2_2068|38_1381|448aa@	c95|UC317_1433|753_2096|448aa@	gi|KLDS_1661|1657328_1659757|810aa	gi|IL1403_1673|1587916_1590348|811aa		gi|CV56_1546|1516466_1518898|811aa
OG_1567	ATP phosphoribosyltransferase (EC 2.4.2.17)	11	c110|FG2_0857|6656_6853|66aa@c110|FG2_0856|6227_6346|40aa@	c102|HP_2527|791_988|66aa@c102|HP_2528|1298_1417|40aa@	c98|LMG6897_2271|791_988|66aa@c98|LMG6897_2272|1298_1417|40aa@	c7|B40_2383|2556_2753|66aa@c7|B40_2384|3063_3182|40aa@	gi|UC5099_1278|1204544_1204741|66aa@gi|UC5099_1279|1205051_1205170|40aa@	c41|DRA4_0328|5325_5522|66aa@	c41|SK110_0318|5325_5522|66aa@c41|SK110_0319|5832_5951|40aa@	gi|SK11_1345|1241287_1241484|66aa@gi|SK11_1344|1240858_1240977|40aa	gi|A76_1351|1248028_1248174|49aa@gi|A76_1350|1247599_1247718|40aa@	c8|KW10_0010|6776_7387|204aa	gi|KW2_1157|1219035_1219661|209aa	c21|N41_1180|20344_20970|209aa	c4|V4_1515|9868_10494|209aa	c11|NCDO763_0849|26121_26747|209aa	gi|MG1363_1351|1265647_1266273|209aa		c3|ATCC19435_2176|11290_11736|149aa@c3|ATCC19435_2175|11111_11329|73aa	c10|E34_2193|30925_31551|209aa	c0|KF134_1760|228227_228853|209aa	c1|KF146_0653|229198_229824|209aa	c7|KF196_0701|11122_11748|209aa	c11|KF201_1132|48376_49002|209aa	c0|KF282_1974|43319_43945|209aa	c10|K231_2129|27674_28300|209aa	c11|KF24_0925|30697_31323|209aa	c0|K337_1448|43084_43710|209aa	c3|KF67_1834|34436_35062|209aa	c0|KF7_1705|304939_305565|209aa	c1|Li1_0714|350663_351289|209aa	c6|LMG14418_1618|11122_11748|209aa	c15|LMG8520_0617|21261_21887|209aa	c0|LMG8526_1631|127807_128433|209aa	c1|LMG9446_0402|278041_278667|209aa	c24|LMG9449_2152|11115_11741|209aa	c14|M20_2651|30711_31337|209aa	c29|ML8_0684|9804_10430|209aa	c16|N42_1835|37098_37724|209aa	c16|AM2_1833|50040_50582|181aa	c12|UC317_2420|11121_11747|209aa	gi|KLDS_1335|1313398_1314024|209aa	gi|IL1403_1315|1230720_1231262|181aa@	gi|IO1_1145|1181815_1182441|209aa	gi|CV56_1251|1212075_1212701|209aa
OG_152	Gluconate permease, Bsu4004 homolog	11	c88|FG2_1614|364_1632|423aa@c88|FG2_1613|225_404|60aa@	c78|HP_2464|9750_11018|423aa@c78|HP_2465|10972_11157|62aa@	c74|LMG6897_0201|9750_11018|423aa@c74|LMG6897_0202|10972_11157|62aa@	c10|B40_1340|36125_37393|423aa@c10|B40_1341|37347_37532|62aa@	gi|UC5099_2276|2151971_2153386|472aa	c2|DRA4_1392|307_1620|438aa@c2|DRA4_1391|209_331|41aa	c2|SK110_1357|307_1620|438aa@c2|SK110_1356|209_331|41aa@	gi|SK11_2518|2327984_2329297|438aa@gi|SK11_2517|2327886_2328008|41aa	gi|A76_2534|2338004_2339419|472aa	c13|KW10_0949|77022_78437|472aa	gi|KW2_2235|2322052_2323467|472aa	c14|N41_2634|62747_64162|472aa	c16|V4_1218|46161_46865|235aa@ c16|V4_1217|45448_45990|181aa@	c33|NCDO763_0499|183_1598|472aa	gi|MG1363_2550|2424123_2425538|472aa	c13|P7266_1677|181_1596|472aa	c17|ATCC19435_0495|40294_41709|472aa	c12|E34_2269|40356_41771|472aa	c18|KF134_0119|19898_21313|472aa	c19|KF146_0742|17593_19008|472aa	c11|KF196_1107|87167_88582|472aa	c14|KF201_2302|27196_28611|472aa	c11|KF282_1775|59869_61284|472aa	c11|K231_1123|63685_65100|472aa	c44|KF24_0588|120_1535|472aa	c14|K337_2365|49660_51075|472aa	c31|KF67_2248|14986_16401|472aa	c11|KF7_1078|78130_79545|472aa	c10|Li1_2340|67270_68685|472aa	c19|LMG14418_0228|140_1555|472aa	c3|LMG8520_2306|86185_87600|472aa	c15|LMG8526_2459|36432_37847|472aa	c13|LMG9446_1548|45088_46503|472aa	c37|LMG9449_0468|15116_16531|472aa	c29|M20_1321|26581_27996|472aa	c43|ML8_1961|134_1195|354aa@ c43|ML8_1962|1202_1549|116aa@	c32|N42_1325|16449_17765|439aa	c39|AM2_2431|521_1555|345aa@c39|AM2_2430|140_481|114aa	c75|UC317_0407|2851_4266|472aa	gi|KLDS_2517|2449567_2450982|472aa	gi|IL1403_2361|2266372_2267406|345aa@gi|IL1403_2360|2265991_2266332|114aa@	gi|IO1_2248|2327100_2328515|472aa	gi|CV56_2331|2255170_2256585|472aa
OG_160	Cell envelope-associated transcriptionalattenuator LytR-CpsA-Psr, subfamily F4 (as inPMID19099556)	11	c41|FG2_1580|534_1454|307aa	c35|HP_2062|534_1454|307aa	c34|LMG6897_1865|534_1454|307aa	c12|B40_2559|594_1514|307aa	gi|UC5099_1015|952990_953763|258aa@gi|UC5099_1014|952845_952988|48aa@	c17|DRA4_0402|2100_2360|87aa@	c17|SK110_0388|1441_2100|220aa@ c17|SK110_0389|2100_2360|87aa@	gi|SK11_0998|941432_942091|220aa@gi|SK11_0999|942091_942351|87aa	gi|A76_1606|1493239_1494159|307aa	c7|KW10_0624|49674_50594|307aa	gi|KW2_0902|944817_945737|307aa	c6|N41_1760|34334_35254|307aa	c5|V4_1067|60528_61448|307aa	c17|NCDO763_0417|8229_9065|279aa	gi|MG1363_1661|1574963_1575799|279aa		c2|ATCC19435_1402|84699_85619|307aa	c6|E34_1851|101589_102509|307aa	c2|KF134_0305|180591_180851|87aa@	c3|KF146_1293|68647_68907|87aa@	c1|KF196_0463|68725_68985|87aa@	c0|KF201_1638|194062_194982|307aa	c0|KF282_2199|281449_282366|306aa	c1|K231_0582|180369_181289|307aa	c2|KF24_1491|30818_31462|215aa@	c0|K337_1669|269567_270487|307aa	c1|KF67_0604|197197_197457|87aa@	c0|KF7_1490|78068_78985|306aa	c1|Li1_0478|76807_77727|307aa	c47|LMG14418_0522|8988_9908|307aa	c2|LMG8520_1360|6358_7278|307aa	c4|LMG8526_0962|97852_98772|307aa	c1|LMG9446_0189|53403_53663|87aa@	c4|LMG9449_0791|91758_92678|307aa	c5|M20_1871|76484_77401|306aa	c5|ML8_1015|14175_14621|149aa@	c0|N42_1013|84519_85439|307aa	c27|AM2_0527|22211_23131|307aa	c7|UC317_2070|42038_42958|307aa	gi|KLDS_0973|952762_953682|307aa	gi|IL1403_1002|954083_955003|307aa	gi|IO1_0919|947830_948747|306aa	gi|CV56_0961|938337_939257|307aa
OG_1773	FIG00756030: hypothetical protein	11	c9|FG2_0956|12670_13530|287aa	c1|HP_0068|12670_13530|287aa	c1|LMG6897_0069|12670_13530|287aa	c3|B40_1255|22152_23012|287aa	gi|UC5099_2037|1932046_1932906|287aa	c1|DRA4_0146|15385_16086|234aa@	c1|SK110_0202|55948_56649|234aa@	gi|SK11_2257|2092098_2092799|234aa@gi|SK11_2256|2091940_2092074|45aa	gi|A76_2259|2087203_2088063|287aa		gi|KW2_2011|2104635_2104802|56aa@gi|KW2_2010|2103939_2104616|226aa	c2|N41_1439|78442_79302|287aa	c6|V4_0928|46653_47513|287aa	c15|NCDO763_0589|6341_7201|287aa	gi|MG1363_2299|2185333_2186193|287aa		c9|ATCC19435_1630|44534_44698|55aa@	c5|E34_2099|160361_161221|287aa	c5|KF134_1932|37116_37976|287aa	c11|KF146_1098|45445_46305|287aa	c3|KF196_1243|45446_46306|287aa	c4|KF201_1028|161546_161716|57aa@	c2|KF282_0206|45102_45980|293aa	c2|K231_0227|45366_46226|287aa	c1|KF24_0178|44519_44683|55aa@		c7|KF67_1511|45451_46311|287aa		c2|Li1_0197|44516_44680|55aa@		c8|LMG8520_0041|34850_35194|115aa@ c8|LMG8520_0040|34334_34618|95aa	c2|LMG8526_0212|43025_43885|287aa	c2|LMG9446_1307|45378_45770|131aa@c2|LMG9446_1308|45861_46238|126aa	c8|LMG9449_0053|44514_44678|55aa@								gi|IO1_2044|2121128_2121988|287aa
OG_1237	Phage infection protein	11	c157|FG2_1381|222_1355|378aa@c136|FG2_1932|78_587|170aa@	c142|HP_1692|2606_3739|378aa@c123|HP_1157|4486_4995|170aa@	c135|LMG6897_1143|222_1355|378aa@c117|LMG6897_0666|4486_4995|170aa@	c110|B40_0872|2680_4515|612aa@c108|B40_1293|78_587|170aa@	gi|UC5099_0969|911017_912888|624aa@gi|UC5099_0967|909482_909991|170aa@	c109|DRA4_0128|1758_3629|624aa@c74|DRA4_0369|78_587|170aa	c106|SK110_2349|1756_3627|624aa@c75|SK110_0372|78_587|170aa@	gi|SK11_0952|900796_902667|624aa@gi|SK11_0950|899261_899770|170aa	gi|A76_1652|1537255_1539126|624aa@gi|A76_1654|1540152_1540661|170aa@	c7|KW10_0669|99014_101413|800aa	gi|KW2_0841|879368_881767|800aa	c6|N41_1810|89379_91778|800aa	c5|V4_1018|7671_10070|800aa	c43|NCDO763_1475|2377_4776|800aa	gi|MG1363_1719|1635111_1637510|800aa	c3|P7266_0124|12047_14719|891aa	c2|ATCC19435_1347|28004_30274|757aa	c6|E34_1802|50425_52695|757aa	c2|KF134_0344|219238_221643|802aa	c3|KF146_1253|27862_30267|802aa	c1|KF196_0424|27939_30344|802aa	c0|KF201_1679|237243_239642|800aa	c0|KF282_2252|338622_341021|800aa	c1|K231_0637|236086_238485|800aa	c37|KF24_0515|12302_14701|800aa	c0|K337_1720|323756_326155|800aa	c35|KF67_0902|7213_9045|611aa@c35|KF67_0901|6646_7185|180aa@	c0|KF7_1443|28117_30516|800aa	c1|Li1_0432|27877_30276|800aa	c10|LMG14418_2270|35952_38351|800aa	c35|LMG8520_1688|3961_6231|757aa	c4|LMG8526_1022|163108_165513|802aa	c1|LMG9446_0150|12620_15025|802aa	c30|LMG9449_2126|15050_17320|757aa	c56|M20_2618|6400_8799|800aa	c12|ML8_2498|28497_30593|699aa@c12|ML8_2497|28194_28460|89aa@	c0|N42_0966|34521_36920|800aa	c13|AM2_1460|25650_28049|800aa	c21|UC317_1164|28418_30817|800aa	gi|KLDS_0919|904934_907333|800aa	gi|IL1403_0951|904024_906423|800aa	gi|IO1_0855|880964_883363|800aa	gi|CV56_0906|887075_889474|800aa
OG_232	ComF operon protein A, DNA transporter ATPase	11	c52|FG2_0469|15874_16185|104aa@c187|FG2_2027|1237_2022|262aa@	c47|HP_0335|15876_16187|104aa@c41|HP_1528|168_953|262aa@	c41|LMG6897_1532|168_953|262aa@c46|LMG6897_1337|15874_16185|104aa@	c80|B40_2081|1709_2221|171aa@c80|B40_2080|927_1712|262aa@	gi|UC5099_1144|1072398_1073183|262aa@gi|UC5099_1143|1071890_1072354|155aa@	c14|DRA4_2576|16471_17256|262aa@c14|DRA4_2575|15962_16474|171aa	c19|SK110_0279|16454_17239|262aa@c19|SK110_0278|15945_16457|171aa@	gi|SK11_1192|1102842_1103627|262aa@gi|SK11_1191|1102333_1102845|171aa	gi|A76_1197|1109029_1109814|262aa@gi|A76_1196|1108541_1109032|164aa@	c12|KW10_2136|64567_65859|431aa	gi|KW2_1021|1057446_1058738|431aa	c12|N41_2512|26077_27369|431aa	c3|V4_1888|127574_128275|234aa@ c3|V4_1887|126983_127534|184aa@	c1|NCDO763_0197|51275_52567|431aa	gi|MG1363_1534|1457104_1458396|431aa	c3|P7266_0258|139899_141215|439aa	c3|ATCC19435_2291|139710_141059|450aa	c8|E34_0037|26490_27812|441aa	c2|KF134_0199|82840_84162|441aa	c3|KF146_1403|167986_169308|441aa	c1|KF196_0569|165384_166706|441aa	c0|KF201_1522|89942_91264|441aa	c0|KF282_2082|171537_172859|441aa	c1|K231_0479|83316_84638|441aa	c2|KF24_1601|129910_131232|441aa	c0|K337_1560|170162_171394|411aa	c1|KF67_0499|99479_100801|441aa	c0|KF7_1596|175231_176553|441aa	c1|Li1_0583|174127_175449|441aa	c77|LMG14418_0937|4946_6913|656aa	c1|LMG8520_0188|11452_12774|441aa	c0|LMG8526_1533|16476_17237|254aa@c0|LMG8526_1532|15934_16470|179aa@	c1|LMG9446_0295|150092_151414|441aa	c9|LMG9449_1783|51200_52522|441aa	c10|M20_2494|13995_15317|441aa	c20|ML8_0036|15551_16873|441aa	c0|N42_1122|181608_182930|441aa	c7|AM2_2023|62674_63996|441aa	c3|UC317_2227|85631_86953|441aa	gi|KLDS_1148|1098981_1100948|656aa	gi|IL1403_1179|1096987_1098309|441aa	gi|IO1_1036|1055373_1056695|441aa	gi|CV56_1136|1081841_1083163|441aa
OG_1672	Glutamate decarboxylase (EC 4.1.1.15)	11	c31|FG2_2547|4215_4421|69aa@c31|FG2_2546|3326_4252|309aa@c31|FG2_2545|3021_3329|103aa@	c27|HP_1612|4118_4324|69aa@c27|HP_1611|3229_4155|309aa@c27|HP_1610|2924_3232|103aa@	c29|LMG6897_0719|4215_4421|69aa@c29|LMG6897_0718|3326_4252|309aa@c29|LMG6897_0717|3021_3329|103aa@	c13|B40_2098|3895_4101|69aa@c13|B40_2097|3006_3932|309aa@c13|B40_2096|2701_3009|103aa@	gi|UC5099_1372|1292355_1292561|69aa@gi|UC5099_1373|1292524_1293756|411aa@	c20|DRA4_0083|3018_4250|411aa@c20|DRA4_0084|4213_4419|69aa	c21|SK110_1160|3018_4250|411aa@c21|SK110_1161|4213_4419|69aa@	gi|SK11_1426|1323586_1324818|411aa@gi|SK11_1425|1323417_1323608|64aa	gi|A76_1435|1329021_1330115|365aa@gi|A76_1434|1328713_1328919|69aa@		gi|KW2_1240|1309275_1310675|467aa	c30|N41_2008|6074_7474|467aa	c4|V4_1599|97093_98493|467aa	c28|NCDO763_2268|2760_4160|467aa	gi|MG1363_1222|1147076_1148476|467aa		c1|ATCC19435_0216|96253_97653|467aa	c7|E34_0692|57948_59348|467aa	c0|KF134_1666|122566_123966|467aa	c1|KF146_0552|122605_124005|467aa	c4|KF196_0837|94124_95524|467aa	c7|KF201_0797|53916_55316|467aa	c8|KF282_0064|73021_74421|467aa	c7|K231_0768|78216_79616|467aa	c25|KF24_2466|23716_25116|467aa	c6|K337_1860|52726_54126|467aa	c3|KF67_1933|141115_142515|467aa	c1|KF7_0384|59406_60806|467aa	c5|Li1_1118|61386_62639|418aa@	c25|LMG14418_2212|23703_25103|467aa	c43|LMG8520_1463|1673_3073|467aa	c0|LMG8526_1717|220717_222117|467aa	c11|LMG9446_0768|13019_14419|467aa	c5|LMG9449_2003|51491_52891|467aa	c16|M20_1753|2840_4240|467aa	c14|ML8_1390|1676_3076|467aa	c2|N42_1458|58417_59817|467aa	c15|AM2_0594|12736_14136|467aa	c11|UC317_0849|12734_14134|467aa	gi|KLDS_1426|1410917_1412317|467aa	gi|IL1403_1404|1323836_1325236|467aa	gi|IO1_1297|1347507_1348430|308aa@gi|IO1_1296|1347030_1347491|154aa@	gi|CV56_1338|1307139_1308539|467aa
OG_1667	2-dehydro-3-deoxygluconate kinase (EC2.7.1.45)	11	c167|FG2_0504|820_1641|274aa@	c65|HP_1201|868_1689|274aa@	c64|LMG6897_2164|868_1689|274aa@	c5|B40_1054|33071_33736|222aa@	gi|UC5099_1662|1565572_1566249|226aa@	c57|DRA4_0737|2304_3116|271aa@	c57|SK110_0694|2304_3116|271aa@	gi|SK11_1768|1649659_1650471|271aa@	gi|A76_0874|824131_824952|274aa@	c2|KW10_0295|142694_143644|317aa	gi|KW2_1586|1677670_1678620|317aa	c5|N41_1960|71422_72372|317aa	c15|V4_1346|34041_34991|317aa	c8|NCDO763_0036|35599_36207|203aa@c8|NCDO763_0035|35257_35520|88aa	gi|MG1363_0888|831738_832346|203aa@gi|MG1363_0889|832425_832688|88aa@		c8|ATCC19435_0017|15351_16301|317aa	c1|E34_0621|256197_257147|317aa	c12|KF134_2345|39990_40940|317aa	c0|KF146_1560|72779_73729|317aa	c12|KF196_2229|25321_26271|317aa	c10|KF201_2137|9751_10701|317aa	c15|KF282_1403|26860_27810|317aa	c14|K231_2266|25367_26317|317aa	c27|KF24_0559|10290_11240|317aa	c12|K337_2225|25380_26330|317aa	c16|KF67_1194|25318_26268|317aa	c4|KF7_0808|46371_47321|317aa	c18|Li1_0139|15477_16427|317aa	c28|LMG14418_2187|25252_26202|317aa		c6|LMG8526_1958|161569_162519|317aa	c7|LMG9446_2066|67343_68293|317aa	c27|LMG9449_0532|10524_11474|317aa	c18|M20_1369|28509_29459|317aa	c0|ML8_0543|43273_44223|317aa	c13|N42_1670|35993_36943|317aa	c0|AM2_0977|82586_83536|317aa	c0|UC317_0968|79985_80935|317aa	gi|KLDS_1805|1779083_1780033|317aa	gi|IL1403_1759|1672057_1673007|317aa	gi|IO1_1619|1705882_1706832|317aa	gi|CV56_1632|1600319_1601269|317aa
OG_1637	Pyruvate oxidase (EC 1.2.3.3)	11	c134|FG2_0425|3283_5010|576aa		c108|LMG6897_1276|3283_5010|576aa			c103|DRA4_2081|2922_4286|455aa@c103|DRA4_2080|2557_2811|85aa@	c101|SK110_0586|2922_4286|455aa@c101|SK110_0585|2557_2811|85aa@	gi|SK11_2355|2178745_2180109|455aa@gi|SK11_2356|2180220_2180474|85aa	gi|A76_2374|2189397_2190374|326aa@ gi|A76_2375|2190406_2190765|120aa@gi|A76_2376|2190876_2191130|85aa@	c1|KW10_0454|115879_117606|576aa	gi|KW2_2086|2177812_2179386|525aa@gi|KW2_2087|2179396_2179515|40aa@	c2|N41_1362|4231_5124|298aa@ c2|N41_1361|3396_4199|268aa@	c6|V4_1003|120830_122557|576aa	c3|NCDO763_2185|59570_61297|576aa	gi|MG1363_2398|2277746_2279473|576aa	c1|P7266_1021|386_2179|598aa	c5|ATCC19435_1831|81510_82532|341aa@c5|ATCC19435_1830|80827_81498|224aa	c5|E34_2025|80207_81910|568aa	c5|KF134_2008|117441_119144|568aa	c4|KF146_0891|61466_63169|568aa	c3|KF196_1351|149490_151193|568aa	c4|KF201_0948|80200_81903|568aa	c2|KF282_0285|125787_127490|568aa	c2|K231_0333|140646_142349|568aa	c1|KF24_0282|140772_142475|568aa	c3|K337_1305|124366_126069|568aa	c14|KF67_2649|57781_59484|568aa	c3|KF7_1347|129713_131416|568aa	c2|Li1_0302|142637_144340|568aa	c5|LMG14418_1706|47049_47984|312aa@ c5|LMG14418_1705|46281_47048|256aa@	c0|LMG8520_1019|37595_38635|347aa@ c0|LMG8520_1018|36943_37566|208aa	c2|LMG8526_0303|129035_130738|568aa	c2|LMG9446_1385|125750_127453|568aa	c14|LMG9449_2783|47800_49257|486aa@c14|LMG9449_2782|47555_47779|75aa	c8|M20_0001|107_1810|568aa	c10|ML8_1320|16927_18630|568aa	c3|N42_2388|126194_127897|568aa	c38|AM2_1422|16920_18623|568aa	c15|UC317_0609|16927_18630|568aa	gi|KLDS_2337|2285285_2286220|312aa@ gi|KLDS_2338|2286221_2286988|256aa@	gi|IL1403_2220|2128720_2130423|568aa	gi|IO1_2119|2199913_2201616|568aa	gi|CV56_2146|2089472_2091175|568aa
OG_282	Late competence protein ComGD, access of DNA toComEA, FIG038316	11	c37|FG2_0239|4194_4382|63aa@	c7|HP_2323|4194_4337|48aa@	c9|LMG6897_0954|4194_4382|63aa@	c18|B40_0789|4194_4382|63aa@	gi|UC5099_2209|2074508_2074696|63aa@	c87|DRA4_2168|2539_2727|63aa@	c9|SK110_1638|44868_45056|63aa@c9|SK110_1639|45116_45247|44aa@	gi|SK11_2449|2248878_2249066|63aa@gi|SK11_2450|2249126_2249317|64aa	gi|A76_2463|2258089_2258277|63aa@	c1|KW10_0527|170925_171230|102aa	gi|KW2_2172|2243157_2243588|144aa	c28|N41_2353|26528_26959|144aa	c10|V4_2326|27496_27936|147aa	c26|NCDO763_0803|5603_6034|144aa	gi|MG1363_2486|2344546_2344851|102aa	c10|P7266_1265|23991_24152|54aa@	c5|ATCC19435_1755|27699_28058|120aa	c5|E34_1952|27700_28059|120aa	c5|KF134_2079|171250_171609|120aa	c4|KF146_0962|115275_115634|120aa	c3|KF196_1422|203298_203657|120aa	c4|KF201_0873|27708_28067|120aa	c2|KF282_0357|178242_178640|133aa	c15|K231_2303|27710_28069|120aa	c59|KF24_1430|5631_5990|120aa	c3|K337_1378|178102_178461|120aa	c14|KF67_2578|5358_5684|109aa	c15|KF7_2349|27702_28061|120aa	c2|Li1_0377|197103_197462|120aa	c18|LMG14418_1286|27698_28057|120aa	c0|LMG8520_1089|89187_89546|120aa	c2|LMG8526_0433|219989_220273|95aa@	c2|LMG9446_1456|179556_179915|120aa	c19|LMG9449_0374|27699_28058|120aa	c8|M20_0077|53944_54303|120aa	c86|ML8_1104|1579_1938|120aa	c48|N42_2113|1720_2118|133aa	c24|AM2_1911|27660_28058|133aa	c79|UC317_1971|1086_1445|120aa	gi|KLDS_2410|2339110_2339508|133aa	gi|IL1403_2296|2186338_2186736|133aa	gi|IO1_2192|2252376_2252735|120aa	gi|CV56_2219|2144404_2144763|120aa
OG_1765	Maltodextrin glucosidase (EC 3.2.1.20)	10	c44|FG2_1737|12952_14811|620aa@c44|FG2_1736|12599_12766|56aa@	c39|HP_2553|12950_14809|620aa@c39|HP_2552|12597_12764|56aa@	c39|LMG6897_2524|12945_14804|620aa@c39|LMG6897_2523|12592_12759|56aa@	c9|B40_0988|33437_35656|740aa	gi|UC5099_0762|716940_717818|293aa@ gi|UC5099_0763|718040_719134|365aa@	c8|DRA4_0013|12738_14957|740aa	c10|SK110_2382|12736_14955|740aa	gi|SK11_0750|709748_711967|740aa	gi|A76_1857|1731380_1732699|440aa@ gi|A76_1856|1730480_1731379|300aa@	c3|KW10_1205|50469_52601|711aa	gi|KW2_0645|671793_674012|740aa	c3|N41_2306|101930_104149|740aa	c1|V4_0446|55965_58184|740aa	c2|NCDO763_1348|3205_5424|740aa	gi|MG1363_1905|1817071_1819290|740aa			c4|E34_0841|49737_51929|731aa										c8|KF7_0082|87843_90035|731aa		c34|LMG14418_1104|18457_20649|731aa						c32|ML8_0669|19451_20818|456aa@ c32|ML8_0668|18626_19423|266aa@	c5|N42_1877|27374_29566|731aa	c23|AM2_1079|28245_29612|456aa@c23|AM2_1078|27420_28217|266aa	c32|UC317_1190|19327_20694|456aa@ c32|UC317_1189|18502_19299|266aa@	gi|KLDS_0759|732995_735187|731aa	gi|IL1403_0782|729487_730284|266aa@		gi|CV56_0742|715573_716940|456aa@ gi|CV56_0743|716968_717765|266aa@
OG_520	N-Acetylneuraminate cytidylyltransferase (EC2.7.7.43) / Platelet activating factor	10	c28|FG2_2566|570_1244|225aa	c22|HP_1468|571_1245|225aa	c25|LMG6897_2439|21832_22506|225aa	c34|B40_1953|14932_15606|225aa	gi|UC5099_0738|698399_699073|225aa	c8|DRA4_0035|32799_33341|181aa@	c10|SK110_2405|32797_33339|181aa@	gi|SK11_0727|691364_691906|181aa@	gi|A76_1880|1750273_1750539|89aa@	c4|KW10_0733|25284_25958|225aa	gi|KW2_0625|653188_653862|225aa	c15|N41_0687|44097_44435|113aa@	c1|V4_0418|29012_29350|113aa@ c1|V4_0417|28676_28837|54aa@	c22|NCDO763_0298|21808_22146|113aa@	gi|MG1363_1926|1837030_1837368|113aa@		c4|ATCC19435_0731|119045_119719|225aa	c4|E34_0947|167425_168099|225aa	c11|KF134_1158|38458_39132|225aa	c15|KF146_2511|12987_13661|225aa	c15|KF196_2355|12986_13660|225aa	c9|KF201_1215|52423_53097|225aa	c4|KF282_1538|5385_6059|225aa	c3|K231_1331|147449_148123|225aa	c3|KF24_2257|8100_8774|225aa	c10|K337_2160|37830_38504|225aa	c17|KF67_0935|13006_13680|225aa	c8|KF7_0064|70825_71499|225aa	c4|Li1_1501|114254_114928|225aa	c43|LMG14418_1382|8131_8805|225aa	c13|LMG8520_1563|23228_23770|181aa@	c5|LMG8526_2019|41140_41694|185aa@	c3|LMG9446_2133|30407_31081|225aa	c1|LMG9449_0282|144563_145237|225aa	c15|M20_0660|38282_38956|225aa	c7|ML8_2299|11718_12392|225aa	c5|N42_1895|46435_47115|227aa	c40|AM2_1390|5701_6375|225aa	c14|UC317_2522|11717_12391|225aa	gi|KLDS_0741|715446_716120|225aa	gi|IL1403_0768|715779_716453|225aa	gi|IO1_0673|689423_690097|225aa	gi|CV56_0720|695724_696398|225aa
OG_1682	FIG00756152: hypothetical protein	10						c81|DRA4_1945|262_2325|688aa@	c83|SK110_2032|5385_7448|688aa@	gi|SK11_1713|1588169_1590232|688aa@gi|SK11_1714|1592602_1595559|986aa	gi|A76_0931|880650_885419|1590aa		gi|KW2_1529|1618428_1623326|1633aa	c10|N41_2424|22079_26887|1603aa	c19|V4_0614|5164_10062|1633aa	c5|NCDO763_1761|21333_24290|986aa@c5|NCDO763_1760|19481_21289|603aa	gi|MG1363_0951|890474_893431|986aa@ gi|MG1363_0950|888622_890430|603aa@		c13|ATCC19435_1543|16283_21139|1619aa	c1|E34_0567|198961_203910|1650aa	c9|KF134_1265|67763_72619|1619aa	c0|KF146_1489|4493_9349|1619aa	c19|KF196_0684|20267_25123|1619aa	c10|KF201_2190|62028_66977|1650aa	c27|KF282_1368|9426_14375|1650aa	c9|K231_1169|42466_47322|1619aa	c34|KF24_1292|3907_8763|1619aa	c11|K337_1053|32225_37174|1650aa	c38|KF67_0738|3914_8770|1619aa	c13|KF7_0960|29309_32989|1227aa@ c13|KF7_0961|33010_34200|397aa@	c14|Li1_2418|5907_10763|1619aa	c76|LMG14418_1757|4703_8770|1356aa@ c76|LMG14418_1756|3822_4586|255aa@	c42|LMG8520_0472|4997_6616|540aa@ c42|LMG8520_0473|6707_9490|928aa@	c6|LMG8526_1848|58148_63097|1650aa	c10|LMG9446_2348|58016_62872|1619aa	c15|LMG9449_0586|4284_9140|1619aa	c54|M20_2116|3585_8534|1650aa	c57|ML8_1700|3903_8852|1650aa	c15|N42_0638|20998_25947|1650aa	c0|AM2_0927|30395_35197|1601aa	c0|UC317_1020|128177_133126|1650aa	gi|KLDS_1699|1690207_1694274|1356aa@ gi|KLDS_1700|1694391_1695155|255aa@	gi|IL1403_1708|1619579_1624528|1650aa	gi|IO1_1566|1644833_1649782|1650aa	gi|CV56_1581|1548130_1551213|1028aa@ gi|CV56_1582|1551276_1553078|601aa@
OG_1938	Sialic acid-specific 9-O-acetylesterase	10				c90|B40_0654|117_809|231aa@	gi|UC5099_1395|1314972_1315664|231aa@	c30|DRA4_1912|116_808|231aa@	c64|SK110_1941|11925_12617|231aa@	gi|SK11_1454|1353926_1354618|231aa@		c8|KW10_0089|95366_97234|623aa	gi|KW2_1256|1329040_1330908|623aa	c35|N41_1709|12156_13514|453aa@c35|N41_1710|13551_14024|158aa@	c4|V4_1618|116607_118475|623aa	c24|NCDO763_1961|16032_17390|453aa@c24|NCDO763_1960|15522_15995|158aa	gi|MG1363_1205|1127360_1128718|453aa@gi|MG1363_1204|1126850_1127323|158aa@		c1|ATCC19435_0296|193264_195111|616aa	c7|E34_0722|92752_94599|616aa				c7|KF201_0776|29280_31136|619aa	c8|KF282_0041|45733_47580|616aa	c7|K231_0747|52766_54619|618aa		c6|K337_1838|28045_29892|616aa			c5|Li1_1136|81095_82378|428aa@	c24|LMG14418_1860|18117_19964|616aa		c0|LMG8526_1736|242127_243974|616aa		c5|LMG9449_1983|30154_31479|442aa@c5|LMG9449_1982|29633_30151|173aa	c35|M20_1721|219_2069|617aa		c2|N42_1541|158265_160112|616aa			gi|KLDS_1450|1435166_1437013|616aa		gi|IO1_1318|1372885_1374732|616aa
OG_49	Inner membrane component of tripartitemultidrug resistance system	10	c29|FG2_0722|8502_9206|235aa@ c29|FG2_0723|9246_9821|192aa@	c24|HP_1092|8502_9206|235aa@ c24|HP_1093|9246_9821|192aa@	c27|LMG6897_1623|8502_9206|235aa@ c27|LMG6897_1624|9246_9821|192aa@	c38|B40_0922|9247_9822|192aa@ c38|B40_0920|8503_8847|115aa@	gi|UC5099_1540|1454376_1455158|261aa@ gi|UC5099_1541|1455198_1455779|194aa@	c10|DRA4_2413|29826_31223|466aa	c12|SK110_2449|29826_31223|466aa	gi|SK11_1627|1514191_1515588|466aa	gi|A76_1006|952100_952975|292aa@ gi|A76_1007|952972_953487|172aa@	c10|KW10_2030|74803_76200|466aa	gi|KW2_1461|1549583_1550980|466aa	c27|N41_0589|12584_13981|466aa	c2|V4_0327|111578_112975|466aa	c25|NCDO763_2304|5129_6244|372aa@c25|NCDO763_2305|6211_6525|105aa	gi|MG1363_1031|961086_962201|372aa@ gi|MG1363_1032|962168_962482|105aa@	c8|P7266_0097|96984_98393|470aa	c6|ATCC19435_1947|75859_77256|466aa	c1|E34_0501|132254_133651|466aa	c8|KF134_0030|29373_30770|466aa	c7|KF146_0772|29373_30770|466aa	c9|KF196_1137|29373_30770|466aa	c5|KF201_1979|58188_59585|466aa	c3|KF282_1851|70639_72036|466aa	c5|K231_1919|28456_29853|466aa	c9|KF24_1780|27600_28622|341aa@ c9|KF24_1781|28612_28998|129aa@	c5|K337_1954|28114_29031|306aa@c5|K337_1953|27635_28111|159aa	c6|KF67_1012|29395_30792|466aa	c1|KF7_0563|249055_250452|466aa	c3|Li1_1704|100581_101978|466aa	c2|LMG14418_1336|41438_42835|466aa	c14|LMG8520_2616|5122_6519|466aa	c9|LMG8526_1247|84926_86323|466aa	c9|LMG9446_1607|66415_67734|440aa	c7|LMG9449_2278|73400_74797|466aa	c9|M20_1684|25808_27205|466aa	c8|ML8_1482|26316_27704|463aa	c4|N42_0798|107148_108545|466aa	c3|AM2_2100|30022_31410|463aa	c2|UC317_1318|28087_29475|463aa	gi|KLDS_1630|1627835_1629232|466aa	gi|IL1403_1638|1556660_1558048|463aa	gi|IO1_1498|1576707_1578104|466aa	gi|CV56_1511|1486439_1487827|463aa
OG_57	Lipid A export ATP-binding/permease proteinMsbA	10	c33|FG2_0282|3039_3959|307aa@ c33|FG2_0283|4092_4820|243aa@	c49|HP_1439|3039_3959|307aa@ c49|HP_1440|4092_4820|243aa@	c8|LMG6897_1433|3039_3959|307aa@ c8|LMG6897_1434|4092_4820|243aa@	c1|B40_0134|70312_71487|392aa@ c1|B40_0135|71531_72094|188aa@	gi|UC5099_0268|258231_259472|414aa@ gi|UC5099_0269|259545_260012|156aa@	c36|DRA4_0060|3034_4815|594aa	c56|SK110_2497|3034_4815|594aa	gi|SK11_0262|245964_247745|594aa	gi|A76_0306|293470_295251|594aa	c0|KW10_1556|244779_246560|594aa	gi|KW2_0244|246895_248676|594aa	c0|N41_0969|3034_4815|594aa	c0|V4_1915|3034_4815|594aa	c0|NCDO763_1101|214784_216565|594aa	gi|MG1363_0278|255940_257721|594aa	c0|P7266_0539|252280_254091|604aa	c0|ATCC19435_0972|91982_93817|612aa	c2|E34_0146|16823_18658|612aa	c3|KF134_1318|21811_23646|612aa	c2|KF146_0314|167209_169044|612aa	c14|KF196_2300|14725_16560|612aa	c2|KF201_0187|36703_38538|612aa	c1|KF282_0476|112371_114206|612aa	c0|K231_1598|230967_232802|612aa	c0|KF24_1126|172218_174053|612aa	c1|K337_0397|35390_37225|612aa	c2|KF67_0291|82608_84443|612aa	c7|KF7_0724|90768_92603|612aa	c0|Li1_1992|221469_223304|612aa	c3|LMG14418_2091|14467_15285|273aa@ c3|LMG14418_2092|15252_16301|350aa@	c36|LMG8520_0120|2757_4574|606aa	c8|LMG8526_0127|127912_129747|612aa	c0|LMG9446_0924|88922_90757|612aa	c0|LMG9449_1154|233144_234013|290aa@	c1|M20_0209|17595_19430|612aa	c23|ML8_0630|14598_16433|612aa	c1|N42_0191|35486_36364|293aa@ c1|N42_0192|36342_37031|230aa@ c1|N42_0190|35195_35398|68aa@	c12|AM2_2368|26183_27925|581aa	c1|UC317_0177|20824_22368|515aa@ c1|UC317_0176|20533_20730|66aa@	gi|KLDS_0311|295752_296801|350aa@gi|KLDS_0312|296768_297586|273aa	gi|IL1403_0290|259172_261007|612aa	gi|IO1_0231|231487_233322|612aa	gi|CV56_0288|246945_248780|612aa
OG_482	Acetylornithine deacetylase (EC 3.5.1.16) - argE	10	c17|FG2_1644|17497_18036|180aa@c17|FG2_1645|18033_18560|176aa@	c15|HP_0373|10371_10910|180aa@c15|HP_0372|9847_10374|176aa@	c20|LMG6897_0034|10371_10910|180aa@c20|LMG6897_0033|9847_10374|176aa@	c74|B40_0207|9691_10230|180aa@c74|B40_0206|9167_9694|176aa@	gi|UC5099_0591|566642_567181|180aa@gi|UC5099_0592|567178_567705|176aa@	c28|DRA4_2311|9931_10470|180aa@	c30|SK110_1892|9843_10382|180aa@c30|SK110_1891|9319_9846|176aa@	gi|SK11_0573|541948_542487|180aa@gi|SK11_0574|542484_543011|176aa	gi|A76_2043|1894027_1894566|180aa@gi|A76_2042|1893503_1894030|176aa@	c4|KW10_0857|156719_157840|374aa	gi|KW2_0506|523851_524972|374aa	c9|N41_1624|18205_19059|285aa@c9|N41_1623|17939_18136|66aa@	c11|V4_1749|64313_65434|374aa	c31|NCDO763_2254|18331_19452|374aa	gi|MG1363_0554|535174_536295|374aa	c8|P7266_0010|13075_14175|367aa	c19|ATCC19435_0412|16142_17260|373aa	c4|E34_0804|16024_17142|373aa	c6|KF134_2210|107726_108889|388aa	c9|KF146_1143|16308_17471|388aa	c5|KF196_2053|107732_108895|388aa	c6|KF201_1904|131303_132421|373aa	c7|KF282_1435|15605_16723|373aa	c18|K231_0150|6306_7424|373aa	c29|KF24_1386|17784_18902|373aa	c9|K337_1097|16128_17246|373aa	c10|KF67_2374|6325_7488|388aa	c6|KF7_1806|16273_17391|373aa	c13|Li1_0798|6303_7421|373aa	c52|LMG14418_0681|882_2000|373aa	c4|LMG8520_0829|69472_70617|382aa	c7|LMG8526_0853|141264_142382|373aa	c6|LMG9446_1937|113760_114923|388aa	c3|LMG9449_2341|16077_17195|373aa	c27|M20_0561|6319_7437|373aa	c6|ML8_2184|66241_67359|373aa	c8|N42_0014|16147_17265|373aa	c5|AM2_1767|67614_68738|375aa	c22|UC317_0309|16996_18114|373aa	gi|KLDS_0608|580723_581841|373aa	gi|IL1403_0606|559225_560343|373aa	gi|IO1_0478|492000_493118|373aa	gi|CV56_0523|492245_493363|373aa
OG_227	Quinolone resistance protein	10	c45|FG2_2050|15176_15487|104aa@c45|FG2_2049|14965_15093|43aa	c42|HP_0275|15176_15487|104aa@c42|HP_0274|14965_15093|43aa	c42|LMG6897_0234|2134_2445|104aa@c42|LMG6897_0235|2528_2656|43aa	c9|B40_0955|2135_2446|104aa@c9|B40_0956|2529_2657|43aa	gi|UC5099_0798|750220_750531|104aa@gi|UC5099_0797|750009_750137|43aa	c42|DRA4_0476|2136_2447|104aa@c42|DRA4_0477|2530_2658|43aa	c42|SK110_0463|2136_2447|104aa@c42|SK110_0464|2530_2658|43aa	gi|SK11_0786|743118_743429|104aa@gi|SK11_0785|742907_743035|43aa	gi|A76_1821|1698992_1699303|104aa@gi|A76_1822|1699386_1699514|43aa	c9|KW10_1142|102007_102633|209aa	gi|KW2_0678|704804_705430|209aa	c3|N41_2275|72616_73242|209aa	c1|V4_0477|86872_87498|209aa	c2|NCDO763_1379|34112_34738|209aa	gi|MG1363_1874|1787757_1788383|209aa	c2|P7266_0678|122993_123610|206aa	c7|ATCC19435_2060|2891_3517|209aa	c9|E34_1147|87724_88350|209aa	c7|KF134_0763|2851_3477|209aa	c6|KF146_1992|2895_3521|209aa	c8|KF196_0004|2849_3475|209aa	c8|KF201_0004|2827_3453|209aa	c4|KF282_1582|47292_47918|209aa	c3|K231_1288|106074_106700|209aa	c3|KF24_2299|49919_50545|209aa	c7|K337_0763|108714_109340|209aa	c5|KF67_1072|2852_3478|209aa	c10|KF7_2118|2851_3477|209aa	c6|Li1_1062|110991_111617|209aa	c110|LMG14418_1371|2825_3451|209aa	c10|LMG8520_2479|57753_58130|126aa@ c10|LMG8520_2478|57505_57687|61aa@	c5|LMG8526_2061|81671_82297|209aa	c3|LMG9446_2177|72358_72984|209aa	c1|LMG9449_0240|102864_103490|209aa	c7|M20_2210|93546_94172|209aa	c4|ML8_1795|74637_75263|209aa	c6|N42_1949|2822_3448|209aa	c11|AM2_0827|2916_3542|209aa	c6|UC317_1656|11672_12298|209aa	gi|KLDS_0791|765573_766199|209aa	gi|IL1403_0814|760781_761296|172aa	gi|IO1_0715|729961_730587|209aa	gi|CV56_0775|747863_748489|209aa
OG_1090	Sortase A, LPXTG specific	10	c7|FG2_2487|26436_27221|262aa@c7|FG2_2488|27354_27554|67aa@c7|FG2_2486|26265_26399|45aa@	c3|HP_1218|6629_7414|262aa@c3|HP_1217|6296_6496|67aa@c3|HP_1219|7451_7585|45aa@	c4|LMG6897_1752|6597_7382|262aa@c4|LMG6897_1751|6264_6464|67aa@c4|LMG6897_1753|7419_7553|45aa@	c6|B40_2163|6597_7382|262aa@c6|B40_2162|6264_6464|67aa@c6|B40_2164|7419_7553|45aa@	gi|UC5099_0807|760069_760524|152aa@gi|UC5099_0806|759739_759939|67aa@gi|UC5099_0808|760687_761028|114aa@	c11|DRA4_0921|6592_7341|250aa@c11|DRA4_0920|6259_6459|67aa@c11|DRA4_0922|7415_7549|45aa	c13|SK110_1531|6592_7341|250aa@c13|SK110_1530|6259_6459|67aa@c13|SK110_1532|7415_7549|45aa@	gi|SK11_0795|752967_753716|250aa@gi|SK11_0794|752634_752834|67aa@gi|SK11_0796|753790_753924|45aa	gi|A76_1812|1688493_1689452|320aa@gi|A76_1813|1689582_1689782|67aa@	c9|KW10_1137|92242_93531|430aa	gi|KW2_0683|713606_714895|430aa	c3|N41_2268|63004_63960|319aa@c3|N41_2269|64147_64293|49aa@	c1|V4_0482|95821_97110|430aa	c2|NCDO763_1384|43063_44352|430aa	gi|MG1363_1869|1778143_1779432|430aa		c7|ATCC19435_2066|11917_13215|433aa	c9|E34_1142|78029_79324|432aa	c7|KF134_0768|11876_13171|432aa	c6|KF146_1999|11926_13221|432aa	c8|KF196_0010|11874_13169|432aa	c8|KF201_0009|11854_13149|432aa	c4|KF282_1588|58046_59317|424aa	c3|K231_1282|96380_97675|432aa	c3|KF24_2305|58944_60239|432aa	c7|K337_0758|99018_100313|432aa	c5|KF67_1077|11877_13172|432aa	c10|KF7_2124|11876_13171|432aa	c6|Li1_1056|101294_102589|432aa	c4|LMG14418_0823|49268_50563|432aa	c10|LMG8520_2469|47924_49219|432aa	c5|LMG8526_2070|96263_97558|432aa	c3|LMG9446_2182|81380_82678|433aa	c1|LMG9449_0235|93170_94465|432aa	c7|M20_2205|83851_85146|432aa	c4|ML8_1789|64940_66235|432aa	c6|N42_1954|11847_13142|432aa	c11|AM2_0833|11941_13236|432aa	c6|UC317_1661|20702_21997|432aa	gi|KLDS_0796|774599_775894|432aa	gi|IL1403_0819|769697_770992|432aa	gi|IO1_0723|741009_742304|432aa	gi|CV56_0780|756892_758187|432aa
OG_1744	CDP-glycerol:poly(glycerophosphate)glycerophosphotransferase (EC 2.7.8.12)	10	c241|FG2_0125|101_325|75aa@	c228|HP_0224|101_325|75aa@	c208|LMG6897_1549|785_1009|75aa@		gi|UC5099_1012|951505_951729|75aa@	c17|DRA4_0399|101_325|75aa@	c17|SK110_0386|101_325|75aa@	gi|SK11_0996|940092_940316|75aa@	gi|A76_1608|1495275_1495499|75aa@	c7|KW10_0626|51710_52810|367aa	gi|KW2_0900|942514_943701|396aa	c6|N41_1762|36370_37557|396aa	c5|V4_1065|58225_59412|396aa	c17|NCDO763_0415|5843_7030|396aa	gi|MG1363_1663|1576998_1578185|396aa		c2|ATCC19435_1400|82396_83583|396aa	c6|E34_1849|99286_100473|396aa				c0|KF201_1640|196098_197285|396aa	c0|KF282_2201|283495_284682|396aa	c1|K231_0584|182405_183547|381aa		c0|K337_1671|271603_272790|396aa		c0|KF7_1488|75752_76939|396aa	c1|Li1_0475|74550_75692|381aa	c47|LMG14418_0520|6685_7872|396aa	c2|LMG8520_1358|4613_5242|210aa@ c2|LMG8520_1357|4119_4619|167aa@	c4|LMG8526_0965|100190_101089|300aa@ c4|LMG8526_0964|99888_100190|101aa@		c4|LMG9449_0793|93794_94936|381aa	c5|M20_1873|78530_79717|396aa	c5|ML8_1012|11399_12586|396aa	c0|N42_1011|82216_83403|396aa	c27|AM2_0525|19908_21095|396aa	c7|UC317_2072|44074_45261|396aa	gi|KLDS_0971|950459_951646|396aa	gi|IL1403_1000|951780_952967|396aa	gi|IO1_0917|945511_946701|397aa	gi|CV56_0959|936034_937221|396aa
OG_1759	NhaP-type Na+/H+ and K+/H+ antiporter	10	c144|FG2_2516|3930_4682|251aa@	c130|HP_2279|3932_4684|251aa@	c124|LMG6897_1684|3930_4682|251aa@	c7|B40_2418|34554_35333|260aa@	gi|UC5099_1318|1238737_1239516|260aa@	c39|DRA4_2545|16650_17429|260aa@	c40|SK110_1475|16650_17429|260aa@	gi|SK11_1307|1207746_1208525|260aa@	gi|A76_1311|1214109_1214888|260aa@	c3|KW10_1191|36731_38677|649aa	gi|KW2_1185|1248724_1250673|650aa		c4|V4_1545|39538_41487|650aa			c3|P7266_0232|118416_120356|647aa	c1|ATCC19435_0173|46555_48504|650aa	c7|E34_0651|9233_11182|650aa	c0|KF134_1708|171731_173680|650aa	c1|KF146_0594|171760_173709|650aa	c4|KF196_0795|44417_46366|650aa	c7|KF201_0839|102090_104039|650aa	c19|KF282_0757|24055_26004|650aa	c7|K231_0810|127357_129306|650aa	c18|KF24_1451|24057_26006|650aa	c6|K337_1902|100891_102840|650aa	c3|KF67_1891|91418_93367|650aa	c1|KF7_0341|9710_11659|650aa	c5|Li1_1076|11688_13637|650aa	c30|LMG14418_1783|130_2079|650aa		c0|LMG8526_1674|170970_172919|650aa	c11|LMG9446_0810|62172_64121|650aa	c5|LMG9449_2048|100955_102586|544aa@c5|LMG9449_2047|100638_100910|91aa	c40|M20_1553|4124_6073|650aa	c65|ML8_1206|4220_6169|650aa	c2|N42_1417|9706_11655|650aa	c16|AM2_1783|2973_4922|650aa		gi|KLDS_1383|1361221_1363170|650aa		gi|IO1_1241|1286955_1288904|650aa	gi|CV56_1296|1257785_1259734|650aa
OG_1891	FIG00755452: hypothetical protein	10				c68|B40_1438|12215_12874|220aa@	gi|UC5099_1455|1375553_1376212|220aa@	c62|DRA4_2197|58_717|220aa@	c62|SK110_2181|12159_12818|220aa@	gi|SK11_1515|1414914_1415573|220aa@	gi|A76_1516|1404941_1405600|220aa@	c14|KW10_2211|46607_47611|335aa	gi|KW2_1345|1427693_1428697|335aa	c17|N41_0485|17746_18750|335aa	c17|V4_0855|17768_18772|335aa	c12|NCDO763_2413|17780_18784|335aa	gi|MG1363_1136|1052879_1053883|335aa	c7|P7266_1447|99194_100195|334aa		c1|E34_0399|16578_17582|335aa				c12|KF201_2227|8647_9651|335aa	c14|KF282_2587|21752_22756|335aa							c51|LMG14418_0735|12044_12793|250aa@	c45|LMG8520_1287|15201_15866|222aa@					c44|ML8_1685|8652_9656|335aa	c24|N42_2091|9070_9504|145aa@	c2|AM2_1318|54504_55508|335aa	c29|UC317_1201|13958_14962|335aa	gi|KLDS_1520|1506009_1506758|250aa@	gi|IL1403_1475|1393430_1394434|335aa	gi|IO1_1392|1452495_1453499|335aa	gi|CV56_1409|1376779_1377783|335aa
OG_1452	NADPH-dependent methylglyoxal reductase(D-lactaldehyde dehydrogenase)	10	c29|FG2_0728|13080_13580|167aa@c29|FG2_0729|13615_13899|95aa@c29|FG2_0730|13896_14012|39aa@	c24|HP_1098|13080_13580|167aa@c24|HP_1099|13615_13896|94aa@c24|HP_1100|13896_14012|39aa@	c27|LMG6897_1629|13080_13580|167aa@c27|LMG6897_1630|13615_13899|95aa@c27|LMG6897_1631|13896_14012|39aa	c38|B40_0927|13080_13622|181aa@c38|B40_0928|13615_13899|95aa@c38|B40_0929|13896_14012|39aa@	gi|UC5099_1547|1459038_1459580|181aa@gi|UC5099_1548|1459573_1459971|133aa@	c10|DRA4_2408|26024_26566|181aa@c10|DRA4_2407|25529_25969|147aa	c12|SK110_2444|26024_26566|181aa@c12|SK110_2443|25529_25969|147aa@c12|SK110_2443|25529_25969|147aa@	gi|SK11_1632|1518848_1519390|181aa@gi|SK11_1633|1519445_1519885|147aa@gi|SK11_1633|1519445_1519885|147aa	gi|A76_1000|947474_948055|194aa@gi|A76_0999|946995_947384|130aa@gi|A76_0999|946995_947384|130aa@	c10|KW10_2035|79460_80497|346aa	gi|KW2_1466|1554238_1555275|346aa	c27|N41_0584|8288_9325|346aa	c2|V4_0332|116233_117270|346aa	c25|NCDO763_2299|833_1870|346aa	gi|MG1363_1026|956790_957827|346aa		c6|ATCC19435_1952|80572_81609|346aa	c1|E34_0506|136966_138003|346aa	c8|KF134_0025|25020_26057|346aa	c7|KF146_0767|25020_26057|346aa	c9|KF196_1132|25020_26057|346aa	c5|KF201_1973|53835_54872|346aa	c3|KF282_1846|66281_67318|346aa	c5|K231_1914|24103_25140|346aa	c9|KF24_1775|23247_24284|346aa	c5|K337_1948|23282_24319|346aa	c6|KF67_1007|25042_26079|346aa	c1|KF7_0568|253768_254805|346aa	c3|Li1_1709|105294_106331|346aa	c2|LMG14418_1341|46152_47189|346aa	c14|LMG8520_2611|767_1804|346aa	c9|LMG8526_1252|89583_90620|346aa	c9|LMG9446_1612|71050_72087|346aa	c7|LMG9449_2283|78113_78919|269aa@c7|LMG9449_2284|78929_79150|74aa@c7|LMG9449_2284|78929_79150|74aa	c9|M20_1679|21513_22493|327aa	c8|ML8_1477|21955_22992|346aa	c4|N42_0803|111861_112898|346aa	c3|AM2_2095|25661_26698|346aa	c2|UC317_1313|23726_24763|346aa	gi|KLDS_1635|1632549_1633586|346aa	gi|IL1403_1643|1561372_1562409|346aa	gi|IO1_1505|1583569_1584606|346aa	gi|CV56_1516|1491151_1492188|346aa
OG_1820	hypothetical protein	10	c54|FG2_2418|457_1005|183aa@c97|FG2_1763|77_1015|313aa@	c50|HP_0954|472_1005|178aa@ c89|HP_1370|75_1013|313aa@	c48|LMG6897_2176|472_1005|178aa@ c85|LMG6897_1947|77_1015|313aa@	c32|B40_0705|456_1004|183aa@c229|B40_2247|60_644|195aa@	gi|UC5099_1801|1706806_1707354|183aa@ gi|UC5099_1805|1708891_1710006|372aa@	c16|DRA4_1877|36684_37010|109aa@c71|DRA4_0461|61_801|247aa	c16|SK110_1813|454_780|109aa@ c73|SK110_1867|61_801|247aa@	gi|SK11_1952|1822146_1822472|109aa gi|SK11_1956|1824017_1824757|247aa	gi|A76_0729|684108_684656|183aa@ gi|A76_0725|681856_682557|234aa@	c16|KW10_1916|16228_17865|546aa	gi|KW2_1737|1834698_1836677|660aa	c8|N41_0036|29680_31608|643aa	c8|V4_0091|84335_85453|373aa@	c6|NCDO763_1843|20941_22869|643aa	gi|MG1363_2018|1924864_1926792|643aa								c6|KF282_1058|69612_70241|210aa@									c1|LMG8526_0553|95518_97464|649aa										gi|IO1_1819|1895955_1897901|649aa
OG_199	Late competence protein ComEA, DNA receptor	10	c93|FG2_0167|8426_8872|149aa@c93|FG2_0165|8217_8333|39aa@	c82|HP_0350|8426_8872|149aa@c82|HP_0348|8217_8333|39aa@	c77|LMG6897_1850|8427_8873|149aa@c77|LMG6897_1848|8218_8334|39aa@	c99|B40_0761|1989_2570|194aa@c99|B40_0762|2527_2643|39aa	gi|UC5099_1821|1721994_1722575|194aa@gi|UC5099_1822|1722532_1722648|39aa@	c69|DRA4_0792|8287_8868|194aa@c69|DRA4_0791|8214_8330|39aa	c71|SK110_0458|8287_8868|194aa@c71|SK110_0457|8214_8330|39aa@	gi|SK11_1972|1836752_1837333|194aa@gi|SK11_1973|1837290_1837406|39aa	gi|A76_0708|668305_668886|194aa@gi|A76_0707|668232_668348|39aa@	c16|KW10_1929|28854_29510|219aa	gi|KW2_1749|1847667_1848323|219aa	c8|N41_0023|18684_19340|219aa	c8|V4_0103|96595_97209|205aa	c6|NCDO763_1830|9945_10601|219aa	gi|MG1363_2030|1937133_1937789|219aa	c9|P7266_1961|102355_103008|218aa	c10|ATCC19435_2417|40910_41557|216aa	c0|E34_1611|191231_191878|216aa	c1|KF134_0532|134930_135577|216aa	c0|KF146_1717|233871_234518|216aa	c0|KF196_1654|188079_188726|216aa	c1|KF201_0543|137649_138296|216aa	c6|KF282_1070|80954_81601|216aa	c4|K231_0870|43543_44190|216aa	c4|KF24_0838|131681_132328|216aa	c2|K337_0206|68060_68707|216aa	c0|KF67_2105|134928_135575|216aa	c9|KF7_1159|69388_70035|216aa	c9|Li1_0894|48372_48644|91aa@ c9|Li1_0893|47998_48165|56aa@	c50|LMG14418_1579|2914_3561|216aa	c12|LMG8520_2544|38511_39158|216aa	c1|LMG8526_0566|108412_109059|216aa	c5|LMG9446_1811|134905_135552|216aa	c2|LMG9449_1593|96977_97624|216aa	c0|M20_1104|158699_159346|216aa	c13|ML8_2040|45526_46173|216aa	c10|N42_2553|32793_33440|216aa	c8|AM2_0045|41267_41914|216aa	c4|UC317_0728|32991_33638|216aa	gi|KLDS_1981|1953278_1953925|216aa	gi|IL1403_1913|1832787_1833434|216aa	gi|IO1_1832|1908851_1909498|216aa	gi|CV56_1808|1773061_1773708|216aa
OG_1357	Transcriptional regulators, LysR family	10	c39|FG2_2726|15160_15894|245aa@c39|FG2_2725|15017_15145|43aa@	c34|HP_1890|15160_15894|245aa@c34|HP_1889|15017_15145|43aa@	c33|LMG6897_0278|15160_15894|245aa@c33|LMG6897_0277|15017_15145|43aa@	c45|B40_2016|14421_15155|245aa@c45|B40_2015|14278_14406|43aa	gi|UC5099_1934|1833526_1834260|245aa@gi|UC5099_1935|1834275_1834403|43aa@	c12|DRA4_2470|36929_37663|245aa@c12|DRA4_2469|36786_36914|43aa	c14|SK110_2576|36930_37664|245aa@c14|SK110_2575|36787_36915|43aa@	gi|SK11_2102|1963412_1964146|245aa@gi|SK11_2103|1964161_1964289|43aa	gi|A76_0539|516464_517198|245aa@gi|A76_0538|516321_516449|43aa@	c5|KW10_1799|34878_35756|293aa	gi|KW2_1927|2018336_2019214|293aa	c4|N41_0765|12655_13533|293aa	c7|V4_1414|23840_24406|189aa@c7|V4_1415|24419_24718|100aa	c9|NCDO763_1629|34919_35797|293aa	gi|MG1363_2143|2050435_2051313|293aa	c7|P7266_1367|14973_15848|292aa	c14|ATCC19435_2558|32310_33188|293aa	c0|E34_1432|29280_30158|293aa	c1|KF134_0642|248043_248921|293aa	c0|KF146_1827|346982_347860|293aa	c0|KF196_1543|74734_75612|293aa	c1|KF201_0670|263269_264147|293aa	c10|KF282_2449|29204_30082|293aa	c12|K231_2187|22007_22885|293aa	c8|KF24_0027|22000_22878|293aa	c2|K337_0323|187434_188312|293aa	c0|KF67_2216|248041_248919|293aa	c12|KF7_2249|35479_36357|293aa	c11|Li1_1584|35424_36302|293aa		c11|LMG8520_0947|50995_51873|293aa	c1|LMG8526_0680|224475_225353|293aa	c12|LMG9446_2410|35482_36360|293aa	c25|LMG9449_2533|11948_12826|293aa	c11|M20_0915|31652_32530|293aa	c27|ML8_1649|11960_12838|293aa	c11|N42_0891|31715_32593|293aa	c31|AM2_2184|21967_22845|293aa	c34|UC317_1128|14820_15698|293aa	gi|KLDS_2091|2065481_2066359|293aa	gi|IL1403_2023|1945945_1946823|293aa	gi|IO1_1959|2037636_2038514|293aa	gi|CV56_1922|1887374_1888252|293aa
OG_1356	transcriptional regulator, MerR family	10	c39|FG2_2723|14597_14836|80aa@c39|FG2_2724|14870_15001|44aa@	c34|HP_1887|14597_14836|80aa@c34|HP_1888|14870_15001|44aa@	c33|LMG6897_0275|14597_14836|80aa@c33|LMG6897_0276|14870_15001|44aa@	c45|B40_2013|13858_14097|80aa@c45|B40_2014|14131_14262|44aa	gi|UC5099_1936|1834419_1834550|44aa@	c12|DRA4_2467|36366_36605|80aa@c12|DRA4_2468|36639_36770|44aa	c14|SK110_2573|36367_36606|80aa@c14|SK110_2574|36640_36771|44aa@	gi|SK11_2105|1964470_1964709|80aa@gi|SK11_2104|1964305_1964436|44aa	gi|A76_0536|515901_516140|80aa@gi|A76_0537|516174_516305|44aa@	c5|KW10_1798|34458_34862|135aa	gi|KW2_1928|2019230_2019634|135aa	c4|N41_0764|12235_12639|135aa	c7|V4_1413|23420_23824|135aa	c9|NCDO763_1628|34499_34903|135aa	gi|MG1363_2144|2051329_2051733|135aa	c5|P7266_0969|100335_100727|131aa	c14|ATCC19435_2559|33204_33608|135aa	c0|E34_1431|28860_29264|135aa	c1|KF134_0643|248937_249341|135aa	c0|KF146_1828|347876_348280|135aa	c0|KF196_1542|74314_74718|135aa	c1|KF201_0671|264163_264567|135aa	c10|KF282_2448|28784_29188|135aa	c12|K231_2186|21587_21991|135aa	c8|KF24_0026|21580_21984|135aa	c2|K337_0324|188328_188732|135aa	c0|KF67_2217|248935_249339|135aa	c12|KF7_2250|36373_36777|135aa	c11|Li1_1585|36318_36722|135aa	c21|LMG14418_1142|30999_31529|177aa	c11|LMG8520_0948|51889_52293|135aa	c1|LMG8526_0681|225369_225773|135aa	c12|LMG9446_2411|36376_36780|135aa	c25|LMG9449_2532|11528_11932|135aa	c11|M20_0914|31232_31636|135aa	c27|ML8_1648|11540_11944|135aa	c11|N42_0890|31295_31699|135aa	c31|AM2_2183|21547_21951|135aa	c34|UC317_1126|14400_14639|80aa@c34|UC317_1127|14673_14804|44aa@	gi|KLDS_2092|2066375_2066779|135aa	gi|IL1403_2024|1946839_1947243|135aa	gi|IO1_1960|2038530_2038934|135aa	gi|CV56_1923|1888268_1888672|135aa
OG_1251	Glutamine amidotransferase, class I - hisH	10	c51|FG2_0482|5181_5540|120aa@c51|FG2_0481|4951_5139|63aa@	c46|HP_1307|5181_5540|120aa@c46|HP_1306|4951_5139|63aa@	c45|LMG6897_1918|5181_5540|120aa@c45|LMG6897_1917|4951_5139|63aa@	c54|B40_2362|5179_5538|120aa@c54|B40_2361|4826_5137|104aa@	gi|UC5099_2131|2015330_2016040|237aa	c65|DRA4_2189|5828_6268|147aa@c65|DRA4_2188|5557_5841|95aa	c67|SK110_1287|5828_6268|147aa@c67|SK110_1286|5557_5841|95aa@	gi|SK11_2367|2189977_2190417|147aa@gi|SK11_2366|2189706_2189990|95aa	gi|A76_2386|2200485_2201072|196aa@	c1|KW10_0462|125455_126165|237aa	gi|KW2_2097|2187426_2188136|237aa	c16|N41_1894|50954_51664|237aa	c10|V4_2402|82899_83609|237aa	c3|NCDO763_2176|50952_51662|237aa	gi|MG1363_2407|2287381_2288091|237aa	c10|P7266_1329|72023_72733|237aa	c5|ATCC19435_1824|73584_74276|231aa	c5|E34_2019|72940_73650|237aa	c5|KF134_2014|125695_126405|237aa	c4|KF146_0897|69720_70430|237aa	c3|KF196_1357|157744_158454|237aa	c4|KF201_0942|72939_73649|237aa	c2|KF282_0291|134046_134756|237aa	c2|K231_0339|148900_149610|237aa	c1|KF24_0288|149026_149736|237aa	c3|K337_1311|132620_133330|237aa	c14|KF67_2643|50520_51230|237aa	c3|KF7_1353|137967_138677|237aa	c2|Li1_0308|150890_151600|237aa	c5|LMG14418_1699|39020_39730|237aa	c0|LMG8520_1025|45192_45902|237aa	c2|LMG8526_0309|137281_137991|237aa	c2|LMG9446_1391|134002_134712|237aa	c14|LMG9449_2776|40293_41003|237aa	c8|M20_0007|8361_9071|237aa	c10|ML8_1314|9666_10376|237aa	c3|N42_2394|134448_135158|237aa	c38|AM2_1416|9659_10246|196aa@	c15|UC317_0602|9666_10049|128aa@c15|UC317_0603|10224_10376|51aa@	gi|KLDS_2344|2293541_2294251|237aa	gi|IL1403_2226|2136974_2137684|237aa	gi|IO1_2126|2208184_2208894|237aa	gi|CV56_2152|2097725_2098435|237aa
OG_1254	FIG00755285: hypothetical protein	10	c51|FG2_0489|11714_12400|229aa@c51|FG2_0490|12404_12637|78aa@	c46|HP_1314|11714_12400|229aa@c46|HP_1315|12404_12637|78aa@	c45|LMG6897_1925|11714_12400|229aa@c45|LMG6897_1926|12404_12637|78aa@	c54|B40_2369|11712_12398|229aa@c54|B40_2370|12402_12635|78aa@	gi|UC5099_2138|2022214_2022900|229aa@gi|UC5099_2139|2022904_2023137|78aa@	c90|DRA4_1119|600_1286|229aa@c90|DRA4_1120|1290_1523|78aa	c88|SK110_0354|4934_5620|229aa@c88|SK110_0353|4697_4930|78aa@	gi|SK11_2377|2197596_2198282|229aa@gi|SK11_2378|2198286_2198519|78aa	gi|A76_2393|2207246_2207932|229aa@gi|A76_2394|2207936_2208169|78aa@	c1|KW10_0468|130930_131853|308aa	gi|KW2_2104|2194315_2195238|308aa	c16|N41_1886|43865_44788|308aa	c10|V4_2395|75797_76720|308aa	c3|NCDO763_2169|43863_44786|308aa	gi|MG1363_2414|2294257_2295180|308aa		c5|ATCC19435_1819|67908_68831|308aa	c5|E34_2014|67264_68187|308aa	c5|KF134_2019|131158_132081|308aa	c4|KF146_0902|75183_76106|308aa	c3|KF196_1362|163207_164130|308aa	c4|KF201_0937|67264_68187|308aa	c2|KF282_0295|138112_139035|308aa	c2|K231_0344|154363_155286|308aa	c1|KF24_0293|154489_155412|308aa	c3|K337_1316|138082_139005|308aa	c14|KF67_2638|44844_45767|308aa	c3|KF7_1358|143430_144044|205aa@c3|KF7_1359|144168_144353|62aa@	c2|Li1_0313|156353_157276|308aa	c5|LMG14418_1694|33344_34267|308aa	c0|LMG8520_1030|49194_50117|308aa	c2|LMG8526_0313|141347_142270|308aa	c2|LMG9446_1396|139465_140388|308aa	c14|LMG9449_2771|34617_35540|308aa	c8|M20_0012|13823_14746|308aa	c10|ML8_1309|3990_4901|304aa	c3|N42_2399|139911_140834|308aa	c38|AM2_1411|3983_4906|308aa	c15|UC317_0597|3990_4913|308aa	gi|KLDS_2349|2299004_2299927|308aa	gi|IL1403_2232|2142439_2143362|308aa	gi|IO1_2130|2212250_2213173|308aa	gi|CV56_2157|2103188_2104111|308aa
OG_1271	hypothetical protein	10	c37|FG2_0244|12080_12382|101aa@	c7|HP_2328|12080_12373|98aa@	c9|LMG6897_0959|12080_12373|98aa@	c18|B40_0794|12080_12382|101aa@	gi|UC5099_2214|2082385_2082576|64aa@	c32|DRA4_1257|5447_5749|101aa@	c34|SK110_1140|5447_5740|98aa@	gi|SK11_2458|2257772_2257963|64aa@	gi|A76_2470|2266982_2267173|64aa@	c1|KW10_0532|178820_179356|179aa	gi|KW2_2177|2251043_2251579|179aa	c28|N41_2348|18537_19073|179aa	c10|V4_2321|19514_20050|179aa	c26|NCDO763_0808|13489_14025|179aa	gi|MG1363_2491|2352432_2352968|179aa		c5|ATCC19435_1750|19621_20157|179aa	c5|E34_1947|19620_20156|179aa	c5|KF134_2084|179153_179689|179aa	c4|KF146_0967|123178_123714|179aa	c3|KF196_1427|211201_211737|179aa	c4|KF201_0868|19631_20167|179aa	c20|KF282_0115|19642_20178|179aa	c15|K231_2298|19631_20167|179aa	c14|KF24_2611|19622_20158|179aa	c3|K337_1383|186005_186541|179aa	c23|KF67_2321|19620_20156|179aa	c15|KF7_2344|19623_20159|179aa	c2|Li1_0383|205004_205540|179aa	c18|LMG14418_1281|19619_20155|179aa	c0|LMG8520_1097|98451_98987|179aa	c2|LMG8526_0438|228119_228655|179aa	c2|LMG9446_1461|187458_187994|179aa	c19|LMG9449_0369|19621_20157|179aa	c8|M20_0082|61847_62383|179aa	c21|ML8_1904|15501_16037|179aa	c21|N42_1287|15073_15609|179aa	c24|AM2_1906|19620_20156|179aa	c28|UC317_2286|6765_7184|140aa@	gi|KLDS_2462|2382126_2382662|179aa	gi|IL1403_2301|2194240_2194776|179aa	gi|IO1_2199|2261635_2262171|179aa	gi|CV56_2277|2187865_2188401|179aa
OG_92	Acetyltransferase (EC 2.3.1.-)	9				c62|B40_2456|11165_11683|173aa	gi|UC5099_1497|1415984_1416502|173aa	c3|DRA4_2247|33286_33804|173aa	c3|SK110_2212|26390_26908|173aa	gi|SK11_1573|1468410_1468928|173aa	gi|A76_1102|1026891_1027409|173aa	c10|KW10_1973|10168_10740|191aa	gi|KW2_1394|1478223_1478795|191aa	c7|N41_2129|26953_27525|191aa	c2|V4_0259|41465_42037|191aa	c41|NCDO763_0372|2751_3323|191aa	gi|MG1363_1080|1001641_1002213|191aa	c1|P7266_1208|190220_190786|189aa	c6|ATCC19435_1890|10103_10669|189aa		c8|KF134_0080|89846_90412|189aa	c7|KF146_0822|89890_90456|189aa	c9|KF196_1187|89891_90457|189aa		c3|KF282_1921|154632_155201|190aa	c5|K231_1975|96010_96576|189aa	c10|KF24_2479|12262_12828|189aa		c6|KF67_1062|89902_90468|189aa	c1|KF7_0510|188077_188643|189aa	c3|Li1_1646|33840_34406|189aa	c17|LMG14418_0367|9993_10307|105aa@ c17|LMG14418_0366|9741_9950|70aa@	c51|LMG8520_0704|389_736|116aa@ c51|LMG8520_0705|746_988|81aa@c51|LMG8520_0703|91_336|82aa@	c9|LMG8526_1183|12227_12796|190aa	c9|LMG9446_1556|6924_7217|98aa@c9|LMG9446_1555|6651_6890|80aa	c7|LMG9449_2221|6669_7235|189aa	c21|M20_1248|14906_15460|185aa	c22|ML8_1541|24689_24898|70aa@ c22|ML8_1539|24332_24457|42aa@	c4|N42_0740|41169_41735|189aa	c3|AM2_2152|90732_91046|105aa@c3|AM2_2151|90480_90689|70aa	c2|UC317_1370|88796_89110|105aa@ c2|UC317_1369|88544_88753|70aa@	gi|KLDS_1571|1565470_1565784|105aa@ gi|KLDS_1572|1565827_1566036|70aa@	gi|IL1403_1585|1495949_1496263|105aa@ gi|IL1403_1586|1496306_1496515|70aa@	gi|IO1_1440|1513538_1514104|189aa	gi|CV56_1459|1426780_1427094|105aa@ gi|CV56_1460|1427137_1427346|70aa@
OG_1455	Xylose isomerase (EC 5.3.1.5)	9	c29|FG2_0714|1091_1981|297aa@c29|FG2_0715|1957_2415|153aa@	c24|HP_1083|1091_1981|297aa@c24|HP_1084|1957_2415|153aa@	c27|LMG6897_1614|1091_1981|297aa@c27|LMG6897_1615|1957_2415|153aa@	c38|B40_0912|1099_2424|442aa	gi|UC5099_1533|1447043_1448368|442aa	c10|DRA4_2421|37231_38400|390aa@	c12|SK110_2457|37231_38400|390aa@	gi|SK11_1620|1507014_1508183|390aa@	gi|A76_1015|959496_960815|440aa	c10|KW10_2022|67474_68793|440aa	gi|KW2_1454|1542254_1543573|440aa	c27|N41_0598|19871_21190|440aa	c2|V4_0319|104251_105570|440aa	c25|NCDO763_2312|12497_13192|232aa@	gi|MG1363_1039|968454_969149|232aa@		c6|ATCC19435_1941|69332_70651|440aa	c1|E34_0495|125728_127047|440aa	c8|KF134_0036|35978_37297|440aa	c7|KF146_0778|35978_37297|440aa	c9|KF196_1143|35978_37297|440aa	c5|KF201_1985|64792_66111|440aa	c3|KF282_1857|77229_78548|440aa	c5|K231_1925|35062_36381|440aa	c9|KF24_1787|34206_35525|440aa	c5|K337_1960|34238_35557|440aa	c6|KF67_1018|36000_37319|440aa	c1|KF7_0557|242528_243847|440aa	c3|Li1_1698|94051_95370|440aa	c2|LMG14418_1330|34912_36231|440aa	c14|LMG8520_2622|11726_13045|440aa	c9|LMG8526_1241|78410_79729|440aa	c9|LMG9446_1601|59811_61130|440aa	c7|LMG9449_2272|66873_68192|440aa	c9|M20_1690|32413_33732|440aa	c8|ML8_1488|32911_34230|440aa	c4|N42_0792|100622_101941|440aa	c3|AM2_2106|36618_37937|440aa	c2|UC317_1324|34682_36001|440aa	gi|KLDS_1624|1621309_1622628|440aa	gi|IL1403_1630|1549053_1550372|440aa	gi|IO1_1490|1569415_1570734|440aa	gi|CV56_1504|1479948_1481006|353aa@gi|CV56_1505|1480969_1481232|88aa@
OG_29	Bactoprenol glucosyl transferase (EC 2.4.1.-)	9	c11|FG2_0557|13650_14246|199aa@	c4|HP_1779|21853_22449|199aa@	c5|LMG6897_1040|21853_22449|199aa@	c17|B40_1609|13923_14246|108aa@c17|B40_1608|13649_13828|60aa@	gi|UC5099_0088|92942_93223|94aa@gi|UC5099_0089|93418_93537|40aa@	c22|DRA4_0227|13921_14244|108aa@c22|DRA4_0226|13649_13813|55aa	c8|SK110_0032|28051_28374|108aa@c8|SK110_0031|27779_27943|55aa@	gi|SK11_0085|86529_86852|108aa@gi|SK11_0086|86960_87124|55aa	gi|A76_0136|134111_134707|199aa@	c11|KW10_0965|13564_14499|312aa	gi|KW2_0080|85514_86449|312aa	c29|N41_1240|13650_14585|312aa	c9|V4_0742|13650_14585|312aa	c30|NCDO763_1931|22997_23932|312aa	gi|MG1363_0113|108034_108969|312aa	c11|P7266_1800|18709_19638|310aa	c11|ATCC19435_0844|50915_51850|312aa	c2|E34_0306|178890_179825|312aa	c3|KF134_1484|182128_183063|312aa	c8|KF146_0071|78704_79639|312aa	c6|KF196_1877|37464_38399|312aa	c3|KF201_1329|75053_75988|312aa	c5|KF282_1160|51088_52023|312aa	c8|K231_0049|50915_51850|312aa	c0|KF24_0967|20876_21811|312aa	c4|K337_0876|110428_111363|312aa	c11|KF67_1785|51147_52082|312aa	c5|KF7_1984|66612_67547|312aa	c0|Li1_1843|77654_78589|312aa	c11|LMG14418_0914|20337_21272|312aa	c6|LMG8520_1900|43757_44692|312aa	c3|LMG8526_1431|147634_148569|312aa	c0|LMG9446_1081|234143_235078|312aa	c6|LMG9449_1933|89168_90103|312aa	c2|M20_1515|129869_130804|312aa	c2|ML8_0794|48464_49399|312aa	c12|N42_2621|17820_18755|312aa	c17|AM2_0384|8767_9702|312aa	c9|UC317_1583|48656_49591|312aa	gi|KLDS_0119|115822_116757|312aa	gi|IL1403_0124|109450_110385|312aa	gi|IO1_0071|76158_77093|312aa	gi|CV56_0131|96993_97928|312aa
OG_1737	hypothetical protein	9	c2|FG2_0841|43271_43693|141aa@ c2|FG2_0842|43659_43793|45aa@	c22|HP_1496|21002_21424|141aa@ c22|HP_1497|21390_21524|45aa@	c25|LMG6897_2411|1653_2075|141aa@ c25|LMG6897_2410|1553_1687|45aa@	c34|B40_1933|1555_2076|174aa	gi|UC5099_0756|711909_712430|174aa	c8|DRA4_0018|19441_19962|174aa	c10|SK110_2387|19439_19960|174aa	gi|SK11_0745|704743_705264|174aa	gi|A76_1862|1737183_1737704|174aa	c4|KW10_0718|11832_12353|174aa	gi|KW2_0640|666788_667309|174aa						c4|ATCC19435_0743|131037_131561|175aa	c4|E34_0959|179417_179941|175aa	c11|KF134_1146|26608_27132|175aa	c14|KF146_2470|27124_27648|175aa	c13|KF196_0986|26631_27155|175aa	c9|KF201_1231|71906_72430|175aa	c4|KF282_1550|17376_17900|175aa	c3|K231_1319|136054_136578|175aa	c3|KF24_2269|20092_20616|175aa	c10|K337_2172|49823_50338|172aa	c18|KF67_0174|22551_23075|175aa	c8|KF7_0076|82825_83349|175aa	c4|Li1_1513|125798_126322|175aa		c13|LMG8520_1549|11821_12345|175aa	c5|LMG8526_2031|53010_53534|175aa	c3|LMG9446_2145|42407_42931|175aa	c1|LMG9449_0270|132721_133245|175aa	c15|M20_0648|26439_26963|175aa	c198|ML8_0498|95_244|50aa@	c5|N42_1882|34058_34207|50aa@	c23|AM2_1084|34104_34253|50aa@	c76|UC317_1876|209_358|50aa@	gi|KLDS_0753|728356_728505|50aa@		gi|IO1_0686|701413_701937|175aa	gi|CV56_0736|710932_711081|50aa@
OG_1160	N-acetylmuramoyl-L-alanine amidase (EC3.5.1.28)	9	c12|FG2_2652|4408_4728|107aa@c12|FG2_2653|4812_5036|75aa@	c13|HP_2030|4408_4728|107aa@c13|HP_2031|4812_4991|60aa@	c15|LMG6897_0332|4407_4727|107aa@c15|LMG6897_0333|4811_4990|60aa@	c68|B40_1432|4408_4728|107aa@c68|B40_1433|4812_5036|75aa	gi|UC5099_1461|1383698_1384018|107aa@gi|UC5099_1460|1383435_1383614|60aa@	c62|DRA4_2203|8204_8524|107aa@c62|DRA4_2202|7941_8120|60aa	c62|SK110_2175|4352_4672|107aa@c62|SK110_2176|4756_4935|60aa@	gi|SK11_1521|1423060_1423380|107aa@gi|SK11_1520|1422752_1422976|75aa	gi|A76_1522|1413087_1413407|107aa@gi|A76_1521|1412824_1413003|60aa@	c14|KW10_2216|54635_55264|210aa	gi|KW2_1350|1435717_1436346|210aa	c17|N41_0478|10153_10782|210aa	c17|V4_0849|10116_10745|210aa	c12|NCDO763_2407|10186_10815|210aa	gi|MG1363_1130|1045285_1045914|210aa	c7|P7266_1453|107039_107677|213aa	c1|ATCC19435_0362|264983_265612|210aa	c1|E34_0404|24521_25150|210aa	c0|KF134_1587|40206_40835|210aa	c1|KF146_0472|40248_40832|195aa	c4|KF196_0916|177299_177883|195aa	c12|KF201_2232|16585_17214|210aa	c14|KF282_2582|14188_14817|210aa	c5|K231_2036|153602_154231|210aa	c17|KF24_0480|18417_19046|210aa	c21|K337_2118|10365_10994|210aa	c9|KF67_0849|44072_44656|195aa	c1|KF7_0465|145199_145828|210aa	c15|Li1_1284|15578_16207|210aa	c51|LMG14418_0730|4480_5109|210aa	c45|LMG8520_1283|7916_8482|189aa	c11|LMG8526_1137|38996_39580|195aa	c8|LMG9446_0064|65873_66457|195aa	c18|LMG9449_1469|20359_20988|210aa	c25|M20_2456|11324_11953|210aa	c64|ML8_2221|6394_7023|210aa	c24|N42_2096|16594_17223|210aa	c2|AM2_1323|62443_63072|210aa	c29|UC317_1196|6394_7023|210aa	gi|KLDS_1525|1513693_1514322|210aa	gi|IL1403_1483|1402494_1403078|195aa	gi|IO1_1397|1460435_1461064|210aa	gi|CV56_1414|1384718_1385347|210aa
OG_830	FIG00756130: hypothetical protein	9	c11|FG2_0555|12299_12943|215aa@c11|FG2_0554|11940_12287|116aa@	c4|HP_1777|20502_21146|215aa@c4|HP_1776|20143_20490|116aa@	c5|LMG6897_1038|20502_21146|215aa@c5|LMG6897_1037|20143_20490|116aa@	c17|B40_1606|12299_12943|215aa@c17|B40_1605|11940_12287|116aa@	gi|UC5099_0091|94254_95255|334aa	c22|DRA4_0224|11939_12943|335aa	c8|SK110_0029|26069_27073|335aa	gi|SK11_0088|87830_88834|335aa	gi|A76_0138|135414_136418|335aa	c11|KW10_0963|11922_12926|335aa	gi|KW2_0082|87156_88160|335aa	c29|N41_1238|11939_12943|335aa	c9|V4_0739|11939_12505|189aa@ c9|V4_0740|12590_12943|118aa@	c30|NCDO763_1933|24639_25643|335aa	gi|MG1363_0115|109676_110680|335aa		c11|ATCC19435_0842|49281_50276|332aa	c2|E34_0304|177256_178251|332aa	c3|KF134_1482|180494_181489|332aa	c8|KF146_0073|80279_81274|332aa	c6|KF196_1875|35830_36825|332aa	c3|KF201_1331|76751_77527|259aa@	c5|KF282_1158|49454_50449|332aa	c8|K231_0047|49282_50277|332aa	c0|KF24_0969|22662_23438|259aa@	c4|K337_0873|107145_108140|332aa	c11|KF67_1783|49513_50508|332aa	c5|KF7_1982|64978_65973|332aa	c0|Li1_1845|79228_80223|332aa	c11|LMG14418_0916|21911_22906|332aa	c6|LMG8520_1902|45331_46326|332aa	c3|LMG8526_1429|146117_146995|293aa@	c0|LMG9446_1079|232509_233285|259aa@	c6|LMG9449_1935|90741_91736|332aa	c2|M20_1513|128235_129230|332aa	c2|ML8_0792|46830_47825|332aa	c12|N42_2619|16186_17181|332aa	c17|AM2_0382|7133_8128|332aa	c9|UC317_1585|50230_51225|332aa	gi|KLDS_0121|117396_118391|332aa	gi|IL1403_0126|111024_112019|332aa	gi|IO1_0073|77736_78731|332aa	gi|CV56_0133|98567_99562|332aa
OG_1587	4-alpha-glucanotransferase (amylomaltase) (EC2.4.1.25)	9	c32|FG2_0712|19646_21091|482aa@	c29|HP_0713|88_1533|482aa@c93|HP_0169|9162_9749|196aa@	c30|LMG6897_1094|88_1533|482aa@c88|LMG6897_1566|9162_9749|196aa@	c35|B40_2142|9162_11165|668aa	gi|UC5099_0717|676394_677782|463aa@gi|UC5099_0718|677894_678397|168aa@	c45|DRA4_1312|10385_12388|668aa	c45|SK110_1270|10385_12388|668aa	gi|SK11_0705|667218_669221|668aa	gi|A76_1901|1770532_1772031|500aa@gi|A76_1902|1772187_1772534|116aa@	c4|KW10_0748|44659_46662|668aa	gi|KW2_0607|631186_633189|668aa	c15|N41_0668|21755_23758|668aa	c1|V4_0398|6669_8672|668aa	c22|NCDO763_0280|132_1514|461aa@c48|NCDO763_1989|9700_10305|202aa	gi|MG1363_1945|1857707_1859089|461aa@gi|MG1363_1948|1860426_1861031|202aa@	c2|P7266_0728|178871_180874|668aa	c4|ATCC19435_0716|98327_100330|668aa	c4|E34_0933|146636_148639|668aa	c11|KF134_1173|57919_59922|668aa	c15|KF146_2526|32448_34451|668aa	c15|KF196_2370|32447_34450|668aa	c9|KF201_1200|31633_33636|668aa	c22|KF282_0728|17552_19555|668aa	c3|K231_1346|166891_168894|668aa	c49|KF24_0074|7962_9965|668aa	c10|K337_2145|17040_19043|668aa	c17|KF67_0950|32467_34470|668aa	c8|KF7_0049|50036_52039|668aa	c4|Li1_1487|93464_95467|668aa	c41|LMG14418_0303|8238_10241|668aa	c13|LMG8520_1579|42668_43828|387aa@c13|LMG8520_1580|43961_44671|237aa@	c5|LMG8526_2003|19994_21997|668aa	c3|LMG9446_2118|9617_11620|668aa	c1|LMG9449_0296|163949_165952|668aa	c4|M20_0735|10594_12597|668aa	c7|ML8_2314|31180_33183|668aa	c5|N42_1910|65903_67906|668aa	c14|AM2_2457|13291_15294|668aa	c14|UC317_2538|31180_33183|668aa	gi|KLDS_0726|694655_696658|668aa	gi|IL1403_0752|694443_695912|490aa@gi|IL1403_0751|693909_694385|159aa@	gi|IO1_0658|668615_670618|668aa	gi|CV56_0705|674947_676950|668aa
OG_51	probably protein phosphatase, evidenced byCOGnitor	9	c28|FG2_2583|12573_13121|183aa@ c28|FG2_2584|13126_13422|99aa@	c22|HP_1485|12574_13122|183aa@ c22|HP_1486|13127_13423|99aa@	c25|LMG6897_2422|9955_10503|183aa@ c25|LMG6897_2421|9654_9950|99aa@	c34|B40_1936|2999_3547|183aa@ c34|B40_1935|2698_2994|99aa@	gi|UC5099_0753|710500_710988|163aa@ gi|UC5099_0754|710993_711289|99aa@	c8|DRA4_0021|20884_21432|183aa@c8|DRA4_0020|20583_20879|99aa@	c10|SK110_2390|20882_21430|183aa@ c10|SK110_2389|20581_20877|99aa@	gi|SK11_0742|703333_703821|163aa gi|SK11_0743|703826_704122|99aa	gi|A76_1865|1738627_1739130|168aa@ gi|A76_1864|1738326_1738622|99aa@	c4|KW10_0720|12974_13912|313aa	gi|KW2_0638|665228_666166|313aa	c15|N41_0701|55764_56702|313aa	c1|V4_0431|40720_41658|313aa	c22|NCDO763_0312|33475_34413|313aa	gi|MG1363_1912|1824764_1825702|313aa		c4|ATCC19435_0741|129479_130417|313aa	c4|E34_0957|177859_178797|313aa	c11|KF134_1148|27752_28690|313aa	c15|KF146_2501|2281_3219|313aa	c15|KF196_2345|2280_3218|313aa	c9|KF201_1225|62857_63795|313aa	c4|KF282_1548|15817_16755|313aa	c3|K231_1321|137198_138136|313aa	c3|KF24_2267|18534_19472|313aa	c10|K337_2170|48265_49203|313aa	c17|KF67_0925|2300_3238|313aa	c8|KF7_0074|81267_82205|313aa	c4|Li1_1511|124240_125178|313aa	c43|LMG14418_1392|18574_19512|313aa	c13|LMG8520_1551|12966_13484|173aa@c13|LMG8520_1552|13489_13767|93aa@	c5|LMG8526_2029|51452_52390|313aa	c3|LMG9446_2143|40849_41787|313aa	c1|LMG9449_0272|133865_134803|313aa	c15|M20_0650|27583_28521|313aa	c7|ML8_2289|1012_1950|313aa	c5|N42_1885|35736_36674|313aa	c40|AM2_1400|16144_17082|313aa	c14|UC317_2512|1011_1949|313aa	gi|KLDS_0751|725888_726826|313aa	gi|IL1403_0778|726222_727160|313aa	gi|IO1_0683|699856_700794|313aa	gi|CV56_0730|706167_707105|313aa
OG_2223	hypothetical protein	9	c140|FG2_0181|1882_2664|261aa@	c127|HP_1749|2214_2996|261aa@	c121|LMG6897_1962|1834_2664|277aa@	c111|B40_0282|1829_2659|277aa@	gi|UC5099_0106|109003_109785|261aa@	c102|DRA4_2525|1877_2659|261aa@	c98|SK110_2087|2234_3064|277aa@	gi|SK11_0104|102535_103365|277aa@	gi|A76_0153|150166_150948|261aa@		gi|KW2_0096|101282_102691|470aa	c1|N41_0182|1270_2658|463aa	c22|V4_0599|28541_29950|470aa	c66|NCDO763_0791|2213_3601|463aa	gi|MG1363_0131|125070_126458|463aa								c5|KF282_1145|35405_36778|458aa																			gi|IO1_0086|91397_92770|458aa
OG_1300	LysR family transcriptional regulator YeiE	9	c176|FG2_2169|350_943|198aa@c176|FG2_2168|124_387|88aa@	c120|HP_1600|1800_2393|198aa@c120|HP_1601|2356_2619|88aa@	c114|LMG6897_1269|2813_3406|198aa@c114|LMG6897_1268|2587_2850|88aa@	c137|B40_0187|369_962|198aa@c137|B40_0186|143_406|88aa@	gi|UC5099_0401|390357_390950|198aa@gi|UC5099_0402|390913_391176|88aa@	c91|DRA4_2044|3870_4463|198aa@c91|DRA4_2043|3644_3907|88aa@	c87|SK110_2156|3870_4463|198aa@c87|SK110_2155|3644_3907|88aa@	gi|SK11_0414|389850_390443|198aa@gi|SK11_0415|390406_390669|88aa	gi|A76_0435|418249_418842|198aa@gi|A76_0436|418805_419068|88aa@	c0|KW10_1436|125259_126077|273aa	gi|KW2_0364|371074_371892|273aa	c11|N41_0898|1795_2613|273aa	c0|V4_2038|129701_130519|273aa	c0|NCDO763_0975|89125_89943|273aa	gi|MG1363_0405|382562_383380|273aa		c0|ATCC19435_1091|211187_212005|273aa	c3|E34_1256|109504_110322|273aa	c4|KF134_0959|107005_107823|273aa	c5|KF146_2147|64286_65104|273aa	c2|KF196_0289|134699_135517|273aa	c2|KF201_0306|155868_156686|273aa	c1|KF282_0598|234547_235365|273aa	c0|K231_1472|107025_107843|273aa	c0|KF24_1245|288813_289631|273aa	c1|K337_0515|154375_155193|273aa	c4|KF67_1605|45000_45818|273aa	c2|KF7_0243|94430_95248|273aa	c0|Li1_2108|337223_338041|273aa	c65|LMG14418_2057|2396_3214|273aa	c7|LMG8520_2106|3381_4199|273aa	c8|LMG8526_0004|3492_4310|273aa	c4|LMG9446_0697|107048_107866|273aa	c0|LMG9449_1035|117777_118484|236aa	c1|M20_0344|148926_149744|273aa	c72|ML8_0902|3508_4326|273aa	c1|N42_0309|151262_152080|273aa	c9|AM2_1499|1800_2618|273aa	c67|UC317_1233|2701_3519|273aa	gi|KLDS_0447|423807_424625|273aa	gi|IL1403_0413|377467_378285|273aa	gi|IO1_0358|360940_361758|273aa	gi|CV56_0404|362545_363363|273aa
OG_519	Lipid A export ATP-binding/permease proteinMsbA	9	c28|FG2_2569|1843_3108|422aa@c28|FG2_2567|1336_1515|60aa@c28|FG2_2568|1678_1842|55aa@	c22|HP_1471|1844_3109|422aa@c22|HP_1469|1337_1516|60aa@c22|HP_1470|1679_1843|55aa@	c25|LMG6897_2436|19968_21233|422aa@c25|LMG6897_2438|21561_21740|60aa@c25|LMG6897_2437|21234_21398|55aa@	c34|B40_1950|13068_14333|422aa@c34|B40_1952|14661_14840|60aa@c34|B40_1951|14334_14498|55aa@	gi|UC5099_0741|699672_700937|422aa@gi|UC5099_0739|699165_699344|60aa@gi|UC5099_0740|699507_699671|55aa@	c8|DRA4_0032|30935_32200|422aa@c8|DRA4_0034|32528_32707|60aa@c8|DRA4_0033|32201_32365|55aa	c10|SK110_2402|30933_32198|422aa@c10|SK110_2404|32526_32705|60aa@c10|SK110_2403|32199_32363|55aa@	gi|SK11_0730|692505_693770|422aa@gi|SK11_0728|691998_692177|60aa@gi|SK11_0729|692340_692504|55aa	gi|A76_1877|1748680_1749684|335aa@gi|A76_1879|1749946_1750110|55aa@	c4|KW10_0732|23420_25192|591aa	gi|KW2_0626|653954_655726|591aa	c15|N41_0688|44527_46299|591aa	c1|V4_0419|29442_31214|591aa	c22|NCDO763_0299|22238_24010|591aa	gi|MG1363_1925|1835166_1836938|591aa	c2|P7266_0715|159395_161164|590aa	c4|ATCC19435_0732|119803_121575|591aa	c4|E34_0948|168183_169955|591aa	c11|KF134_1157|36602_38374|591aa	c15|KF146_2510|11131_12903|591aa	c15|KF196_2354|11130_12902|591aa	c9|KF201_1216|53200_54954|585aa	c4|KF282_1539|6143_7915|591aa	c3|K231_1330|145592_147364|591aa	c3|KF24_2258|8858_10630|591aa	c10|K337_2161|38588_40360|591aa	c17|KF67_0934|11150_12922|591aa	c8|KF7_0065|71583_73355|591aa	c4|Li1_1502|115012_116784|591aa	c43|LMG14418_1383|8889_10661|591aa	c13|LMG8520_1562|21372_23144|591aa	c5|LMG8526_2020|41778_43550|591aa	c3|LMG9446_2134|31165_32937|591aa	c1|LMG9449_0281|142707_144479|591aa	c15|M20_0659|36425_38197|591aa	c7|ML8_2298|9862_11634|591aa	c5|N42_1894|44586_46358|591aa	c40|AM2_1391|6459_8231|591aa	c14|UC317_2521|9861_11633|591aa	gi|KLDS_0742|716222_717976|585aa	gi|IL1403_0769|716537_718309|591aa	gi|IO1_0674|690181_691953|591aa	gi|CV56_0721|696482_698254|591aa
OG_1064	Rhodanese-like domain protein	9	c7|FG2_2457|3239_3406|56aa@	c3|HP_1248|30444_30611|56aa@	c4|LMG6897_1782|30412_30579|56aa@	c6|B40_2193|30388_30555|56aa@	gi|UC5099_0837|783892_784059|56aa@	c11|DRA4_0951|30383_30550|56aa@	c13|SK110_1561|30383_30550|56aa@	gi|SK11_0825|776758_776925|56aa@	gi|A76_1782|1665454_1665621|56aa@	c9|KW10_1101|61158_61466|103aa	gi|KW2_0711|737643_737951|103aa	c3|N41_2238|39904_40212|103aa	c1|V4_0511|119902_120210|103aa	c2|NCDO763_1414|67143_67451|103aa	gi|MG1363_1839|1755044_1755352|103aa	c1|P7266_1230|212073_212384|104aa	c7|ATCC19435_2093|36010_36318|103aa	c9|E34_1115|54859_55167|103aa	c7|KF134_0795|35917_36225|103aa	c6|KF146_2026|35968_36276|103aa	c8|KF196_0036|35915_36223|103aa	c8|KF201_0037|35944_36252|103aa	c4|KF282_1616|82179_82487|103aa	c3|K231_1255|73381_73689|103aa	c3|KF24_2332|82981_83289|103aa	c7|K337_0731|75917_76225|103aa	c5|KF67_1104|35917_36225|103aa	c10|KF7_2151|35916_36224|103aa	c6|Li1_1029|78197_78505|103aa	c4|LMG14418_0796|26213_26521|103aa	c10|LMG8520_2441|24954_25262|103aa	c5|LMG8526_2098|120410_120718|103aa	c3|LMG9446_2208|105424_105732|103aa	c1|LMG9449_0208|70067_70375|103aa	c7|M20_2178|60748_61056|103aa	c4|ML8_1762|41886_42194|103aa	c6|N42_1981|35931_36239|103aa	c11|AM2_0860|35983_36291|103aa	c6|UC317_1688|44743_45051|103aa	gi|KLDS_0823|798639_798947|103aa	gi|IL1403_0846|793727_794035|103aa	gi|IO1_0756|772907_773215|103aa	gi|CV56_0807|780934_781242|103aa
OG_139	PTS system, cellobiose-specific IIC component(EC 2.7.1.69)	9	c10|FG2_1321|3275_4456|394aa@c10|FG2_1320|3038_3157|40aa@	c11|HP_0520|25829_27010|394aa@c11|HP_0521|27128_27247|40aa@	c13|LMG6897_2035|25829_27010|394aa@c13|LMG6897_2036|27128_27247|40aa@	c19|B40_0160|25830_26903|358aa@c19|B40_0161|26961_27248|96aa	gi|UC5099_0879|823881_825299|473aa	c26|DRA4_0906|26520_27290|257aa@c26|DRA4_0905|25872_26486|205aa	c27|SK110_0529|26520_27290|257aa@ c27|SK110_0528|25872_26486|205aa@	gi|SK11_0870|818281_819051|257aa gi|SK11_0869|817633_818247|205aa	gi|A76_1740|1624963_1625922|320aa@	c9|KW10_1067|23101_24519|473aa	gi|KW2_0743|774314_775732|473aa	c3|N41_2207|3274_4542|423aa@c3|N41_2206|3134_3253|40aa@	c1|V4_0542|155571_156989|473aa	c2|NCDO763_1446|103271_104230|320aa c2|NCDO763_1445|102813_103286|158aa	gi|MG1363_1807|1718265_1719224|320aa@ gi|MG1363_1808|1719209_1719682|158aa@		c7|ATCC19435_2125|71613_73031|473aa	c9|E34_1082|18462_19880|473aa	c7|KF134_0828|71205_72623|473aa	c6|KF146_2059|71257_72675|473aa	c8|KF196_0069|71205_72623|473aa	c8|KF201_0070|71215_72633|473aa	c4|KF282_1648|120116_121534|473aa	c3|K231_1222|34333_35751|473aa	c3|KF24_2365|118581_119999|473aa	c7|K337_0699|39325_40743|473aa	c5|KF67_1137|71207_72625|473aa	c10|KF7_2182|71516_72934|473aa	c6|Li1_0996|39150_40568|473aa	c8|LMG14418_0009|11121_12539|473aa	c32|LMG8520_1232|11033_12451|473aa	c5|LMG8526_2132|155997_157415|473aa	c3|LMG9446_2241|140713_142131|473aa	c1|LMG9449_0175|31002_32420|473aa	c7|M20_2146|24058_25476|473aa	c4|ML8_1727|3135_4553|473aa	c6|N42_2016|73575_74993|473aa	c46|AM2_2411|3136_4554|473aa	c6|UC317_1722|82385_83803|473aa	gi|KLDS_0857|836278_837696|473aa	gi|IL1403_0881|831369_832787|473aa	gi|IO1_0789|808591_810009|473aa	gi|CV56_0842|818577_819995|473aa
OG_67	Diaminohydroxyphosphoribosylaminopyrimidinedeaminase (EC 3.5.4.26) /5-amino-6-(5-phosphoribosylamino)uracil reductase (EC1.1.1.193) - ribD	9	c218|FG2_1215|84_923|280aa@	c9|HP_0951|30940_31779|280aa@	c11|LMG6897_0503|30941_31780|280aa@	c14|B40_1414|31405_32028|208aa@c14|B40_1413|30941_31393|151aa@	gi|UC5099_1093|1028463_1029551|363aa	c37|DRA4_0457|19672_20295|208aa@c37|DRA4_0456|19208_19660|151aa	c38|SK110_1505|19672_20295|208aa@ c38|SK110_1504|19208_19660|151aa@	gi|SK11_1074|1015582_1016205|208aa@gi|SK11_1073|1015118_1015570|151aa	gi|A76_1531|1421413_1422036|208aa@ gi|A76_1532|1422048_1422500|151aa@	c12|KW10_2080|12699_13787|363aa	gi|KW2_0970|1013245_1014333|363aa	c19|N41_0402|18947_20035|363aa	c5|V4_1138|129309_130397|363aa	c1|NCDO763_0245|97478_98566|363aa	gi|MG1363_1585|1503379_1504467|363aa	c7|P7266_1352|1215_2303|363aa	c2|ATCC19435_1470|151558_152646|363aa	c6|E34_1912|163166_164254|363aa	c2|KF134_0246|120789_121877|363aa	c3|KF146_1352|127590_128678|363aa	c1|KF196_0522|127669_128757|363aa	c0|KF201_1578|134287_135375|363aa	c0|KF282_2138|214248_215336|363aa	c1|K231_0523|120593_121681|363aa	c2|KF24_1550|90151_91239|363aa	c0|K337_1610|209794_210882|363aa	c1|KF67_0545|137428_138516|363aa	c0|KF7_1549|137675_138763|363aa	c1|Li1_0537|136412_137500|363aa	c7|LMG14418_2020|26941_28029|363aa	c2|LMG8520_1429|67900_68988|363aa	c4|LMG8526_0890|19331_20419|363aa	c1|LMG9446_0248|112377_113465|363aa	c4|LMG9449_0723|26008_26778|257aa@c4|LMG9449_0724|26837_27076|80aa	c5|M20_1811|16700_17788|363aa	c5|ML8_1082|80543_81631|363aa	c0|N42_1074|144126_145214|363aa	c10|AM2_2289|16778_17866|363aa	c24|UC317_1950|24086_25174|363aa	gi|KLDS_1099|1059851_1060939|363aa	gi|IL1403_1072|1022028_1023116|363aa	gi|IO1_0978|1007455_1008543|363aa	gi|CV56_1030|1005205_1006293|363aa
OG_164	Probable transport protein	9	c90|FG2_0659|5947_7104|386aa@c90|FG2_0660|7135_7368|78aa@	c79|HP_2239|5946_7103|386aa@c79|HP_2240|7134_7367|78aa@	c75|LMG6897_0211|5949_7106|386aa@c75|LMG6897_0212|7137_7370|78aa@	c73|B40_2259|5965_7386|474aa	gi|UC5099_1165|1095730_1096554|275aa@	c14|DRA4_2598|39824_40648|275aa@	c104|SK110_0565|3047_3871|275aa@	gi|SK11_1214|1126195_1127019|275aa@	gi|A76_1219|1132376_1133200|275aa@	c3|KW10_1307|168224_169693|490aa	gi|KW2_1042|1081343_1082812|490aa	c12|N41_2541|61015_62484|490aa	c3|V4_1857|91845_93314|490aa	c1|NCDO763_0168|16171_17640|490aa	gi|MG1363_1505|1422000_1423469|490aa	c3|P7266_0278|162542_164011|490aa	c3|ATCC19435_2270|116481_117947|489aa	c8|E34_0057|49570_51036|489aa	c2|KF134_0179|59613_61079|489aa	c3|KF146_1423|191069_192535|489aa	c1|KF196_0589|188467_189933|489aa	c0|KF201_1502|66713_68182|490aa	c0|KF282_2062|148311_149777|489aa	c1|K231_0458|59567_61033|489aa	c2|KF24_1621|152992_154458|489aa	c0|K337_1539|146800_148266|489aa	c1|KF67_0479|76251_77717|489aa	c0|KF7_1616|198339_199805|489aa	c1|Li1_0603|197210_198676|489aa	c9|LMG14418_1530|19295_20761|489aa	c1|LMG8520_0212|34994_35797|268aa@ c1|LMG8520_0211|34423_34932|170aa@	c0|LMG8526_1553|38999_40465|489aa	c1|LMG9446_0315|173175_174641|489aa	c9|LMG9449_1763|27974_29440|489aa	c10|M20_2514|37076_38542|489aa	c18|ML8_0723|6410_7876|489aa	c0|N42_1142|204689_206155|489aa	c7|AM2_2002|39572_40915|448aa	c3|UC317_2207|62406_63872|489aa	gi|KLDS_1169|1122711_1124177|489aa	gi|IL1403_1199|1120067_1121533|489aa	gi|IO1_1056|1078523_1079989|489aa	gi|CV56_1156|1104923_1106389|489aa
OG_1550	MutT/nudix family protein	9	c43|FG2_2112|14480_14776|99aa@c43|FG2_2113|14777_14947|57aa@	c38|HP_0898|3180_3476|99aa@c38|HP_0897|3009_3179|57aa@	c38|LMG6897_0922|3180_3476|99aa@c38|LMG6897_0921|3009_3179|57aa@	c50|B40_1004|14099_14395|99aa@c50|B40_1005|14396_14566|57aa@	gi|UC5099_1176|1111755_1112051|99aa@gi|UC5099_1177|1112052_1112183|44aa@	c49|DRA4_0052|12998_13294|99aa@c49|DRA4_0053|13295_13465|57aa	c49|SK110_0063|12998_13294|99aa@c49|SK110_0064|13295_13465|57aa@	gi|SK11_1224|1141121_1141417|99aa@gi|SK11_1225|1141418_1141588|57aa	gi|A76_1229|1145965_1146261|99aa@gi|A76_1230|1146262_1146432|57aa@	c3|KW10_1300|156227_156694|156aa	gi|KW2_1049|1094363_1094830|156aa	c13|N41_1605|65786_66253|156aa	c3|V4_1850|79842_80309|156aa	c1|NCDO763_0161|4168_4635|156aa	gi|MG1363_1498|1409997_1410464|156aa	c12|P7266_1469|7943_8371|143aa	c3|ATCC19435_2260|101456_101923|156aa	c8|E34_0066|63951_64418|156aa	c2|KF134_0171|46229_46696|156aa	c3|KF146_1431|205452_205919|156aa	c1|KF196_0597|202850_203317|156aa	c0|KF201_1490|46650_47117|156aa	c0|KF282_2054|134930_135397|156aa	c1|K231_0450|46183_46650|156aa	c2|KF24_1630|167371_167838|156aa	c0|K337_1529|131776_132243|156aa	c1|KF67_0471|62867_63334|156aa	c0|KF7_1626|214365_214832|156aa	c1|Li1_0611|211593_212060|156aa	c9|LMG14418_1541|35317_35784|156aa	c1|LMG8520_0222|46897_47364|156aa	c0|LMG8526_1562|53384_53851|156aa	c1|LMG9446_0324|187558_188025|156aa	c9|LMG9449_1754|14590_15057|156aa	c10|M20_2522|51456_51923|156aa	c18|ML8_0732|22431_22898|156aa	c0|N42_1151|220713_221180|156aa	c7|AM2_1992|24426_24893|156aa	c3|UC317_2196|47384_47851|156aa	gi|KLDS_1180|1138734_1139201|156aa	gi|IL1403_1209|1136089_1136556|156aa	gi|IO1_1067|1094548_1095015|156aa	gi|CV56_1167|1120945_1121412|156aa
OG_2311	putative secreted protein	9	c6|FG2_2201|2291_2623|111aa@	c8|HP_1400|2291_2623|111aa@	c10|LMG6897_1281|2291_2623|111aa@	c52|B40_0461|14752_15084|111aa@	gi|UC5099_1185|1118326_1118658|111aa@	c5|DRA4_1775|2293_2625|111aa@	c29|SK110_1250|26529_26861|111aa@	gi|SK11_1233|1147692_1147871|60aa@	gi|A76_1238|1152537_1152869|111aa@	c3|KW10_1294|150604_151128|175aa	gi|KW2_1056|1099923_1100447|175aa	c13|N41_1597|60164_60688|175aa	c3|V4_1843|74219_74743|175aa	c14|NCDO763_2478|814_1338|175aa	gi|MG1363_1487|1403462_1403986|175aa
OG_2312	hypothetical protein	9	c6|FG2_2204|3754_4488|245aa@	c8|HP_1403|3754_4488|245aa@	c10|LMG6897_1284|3754_4488|245aa@	c52|B40_0458|12887_13621|245aa@	gi|UC5099_1188|1119789_1120523|245aa@	c5|DRA4_1778|3756_4490|245aa@	c29|SK110_1247|24664_25398|245aa@	gi|SK11_1237|1149156_1149890|245aa@	gi|A76_1241|1154000_1154734|245aa@	c3|KW10_1293|147938_150352|805aa	gi|KW2_1057|1100787_1103111|775aa	c13|N41_1596|57498_59969|824aa	c3|V4_1842|71555_74023|823aa	c14|NCDO763_2479|1555_4005|817aa	gi|MG1363_1486|1400795_1403245|817aa
OG_1557	Choloylglycine hydrolase (EC 3.5.1.24)	9	c6|FG2_2219|15745_16305|187aa@c6|FG2_2218|15565_15735|57aa@	c8|HP_1418|15745_16305|187aa@c8|HP_1417|15565_15735|57aa@	c10|LMG6897_1299|15745_16305|187aa@c10|LMG6897_1298|15565_15735|57aa@	c52|B40_0441|889_1626|246aa@c52|B40_0442|1636_1806|57aa@	gi|UC5099_1202|1131780_1132517|246aa@gi|UC5099_1201|1131600_1131770|57aa@	c5|DRA4_1793|15732_16469|246aa@c5|DRA4_1792|15552_15722|57aa	c29|SK110_1232|12685_13422|246aa@c29|SK110_1233|13432_13602|57aa@	gi|SK11_1252|1161132_1161869|246aa@gi|SK11_1251|1160952_1161122|57aa	gi|A76_1257|1165991_1166728|246aa@gi|A76_1256|1165811_1165981|57aa@	c3|KW10_1282|136977_137894|306aa	gi|KW2_1067|1113197_1114114|306aa	c13|N41_1585|46497_47414|306aa	c3|V4_1831|60554_61471|306aa	c14|NCDO763_2490|14089_15006|306aa	gi|MG1363_1475|1389794_1390711|306aa	c12|P7266_1482|19716_20636|307aa	c3|ATCC19435_2246|87678_88649|324aa	c8|E34_0079|77298_78269|324aa	c2|KF134_0158|32379_33350|324aa	c3|KF146_1445|218798_219769|324aa	c1|KF196_0610|216196_217167|324aa	c0|KF201_1477|32799_33770|324aa	c0|KF282_2041|121018_121989|324aa	c1|K231_0436|32333_33304|324aa	c2|KF24_1643|180717_181688|324aa	c0|K337_1516|117927_118898|324aa	c1|KF67_0458|49016_49987|324aa	c0|KF7_1640|227770_228741|324aa	c1|Li1_0624|224939_225910|324aa	c87|LMG14418_2046|6043_7014|324aa	c1|LMG8520_0237|59672_60643|324aa	c0|LMG8526_1576|66780_67751|324aa	c1|LMG9446_0337|200903_201874|324aa	c9|LMG9449_1739|739_1710|324aa	c10|M20_2536|64860_65831|324aa	c18|ML8_0746|35778_36749|324aa	c0|N42_1165|233886_234857|324aa	c7|AM2_1977|10574_11545|324aa	c3|UC317_2182|33534_34505|324aa	gi|KLDS_1193|1152082_1153053|324aa	gi|IL1403_1223|1149436_1150407|324aa	gi|IO1_1081|1107953_1108924|324aa	gi|CV56_1181|1134292_1135263|324aa
OG_1630	FIG00755110: hypothetical protein	9	c6|FG2_2221|16528_17115|196aa	c8|HP_1420|16528_17115|196aa	c10|LMG6897_1301|16528_17115|196aa	c52|B40_0440|376_843|156aa@	gi|UC5099_1203|1132563_1133030|156aa@	c5|DRA4_1794|16515_17102|196aa	c29|SK110_1231|12052_12639|196aa	gi|SK11_1253|1161915_1162502|196aa	gi|A76_1258|1166774_1167361|196aa	c3|KW10_1281|136344_136931|196aa	gi|KW2_1068|1114160_1114747|196aa	c13|N41_1583|45864_46265|134aa@	c3|V4_1829|59921_60322|134aa@c3|V4_1830|60276_60455|60aa	c14|NCDO763_2492|15238_15639|134aa	gi|MG1363_1473|1389161_1389562|134aa@	c12|P7266_1485|22514_22795|94aa@c12|P7266_1484|22255_22404|50aa	c3|ATCC19435_2245|87042_87629|196aa	c8|E34_0080|78318_78905|196aa	c2|KF134_0157|31743_32330|196aa	c3|KF146_1446|219818_220405|196aa	c1|KF196_0611|217216_217803|196aa	c0|KF201_1475|32163_32624|154aa@c0|KF201_1476|32634_32750|39aa	c0|KF282_2040|120382_120969|196aa	c1|K231_0435|31697_32284|196aa	c2|KF24_1644|181737_182324|196aa	c0|K337_1515|117291_117878|196aa	c1|KF67_0457|48380_48967|196aa	c0|KF7_1641|228790_229377|196aa	c1|Li1_0625|225959_226546|196aa	c87|LMG14418_2047|7063_7650|196aa	c1|LMG8520_0238|60692_60994|101aa@ c1|LMG8520_0239|60954_61223|90aa@	c0|LMG8526_1577|67799_68371|191aa	c1|LMG9446_0338|201923_202510|196aa	c9|LMG9449_1738|103_690|196aa	c10|M20_2537|65880_66467|196aa	c18|ML8_0747|36798_37385|196aa	c0|N42_1166|234906_235493|196aa	c7|AM2_1976|9938_10525|196aa	c3|UC317_2181|32898_33485|196aa	gi|KLDS_1194|1153102_1153689|196aa	gi|IL1403_1224|1150456_1151043|196aa	gi|IO1_1082|1108973_1109482|170aa@	gi|CV56_1182|1135312_1135899|196aa
OG_1720	Probable aminoglycoside 3'-phosphotransferase(EC 2.7.1.95) (Kanamycin kinase)	9	c110|FG2_0853|3701_4225|175aa@c110|FG2_0852|3544_3717|58aa@	c102|HP_2531|3419_3943|175aa@c102|HP_2532|3927_4100|58aa@	c98|LMG6897_2275|3419_3943|175aa@c98|LMG6897_2276|3927_4100|58aa@	c7|B40_2387|5184_5864|227aa@	gi|UC5099_1282|1207244_1207852|203aa@	c41|DRA4_0332|7953_8633|227aa@	c41|SK110_0322|7953_8633|227aa@	gi|SK11_1341|1238176_1238856|227aa@	gi|A76_1346|1244917_1245525|203aa	c8|KW10_0006|3606_4394|263aa	gi|KW2_1160|1221549_1222337|263aa	c21|N41_1177|17668_18456|263aa	c4|V4_1518|12382_13170|263aa	c11|NCDO763_0852|28635_29423|263aa	gi|MG1363_1348|1262971_1263759|263aa		c3|ATCC19435_2171|7606_8394|263aa	c10|E34_2189|27420_28208|263aa	c0|KF134_1756|224722_225510|263aa	c1|KF146_0649|225693_226481|263aa	c7|KF196_0697|7617_8405|263aa	c11|KF201_1136|51719_52507|263aa		c10|K231_2125|24169_24957|263aa	c11|KF24_0921|27192_27980|263aa		c3|KF67_1838|37779_38567|263aa	c0|KF7_1709|308282_309070|263aa	c1|Li1_0718|354006_354794|263aa	c6|LMG14418_1614|7617_8405|263aa	c15|LMG8520_0622|24783_25385|201aa@		c1|LMG9446_0406|281384_282172|263aa	c24|LMG9449_2148|7610_8398|263aa	c14|M20_2647|27206_27994|263aa	c29|ML8_0688|13147_13935|263aa	c16|N42_1839|40441_41229|263aa	c16|AM2_1828|46453_47241|263aa	c12|UC317_2416|7616_8404|263aa	gi|KLDS_1339|1316741_1317529|263aa	gi|IL1403_1319|1234060_1234848|263aa	gi|IO1_1149|1185158_1185946|263aa	gi|CV56_1255|1215418_1216206|263aa
OG_2820	Cell surface protein precursor	9	c12|FG2_2660|13744_13950|69aa@	c13|HP_2038|13744_13950|69aa@	c15|LMG6897_0340|13743_13949|69aa@			c4|DRA4_0802|2522_2728|69aa@	c4|SK110_0757|2522_2728|69aa@	gi|SK11_1509|1411107_1411313|69aa@																						c51|LMG14418_0739|15048_15455|136aa@										gi|KLDS_1516|1503353_1503760|136aa@	gi|IL1403_1471|1391010_1391336|109aa@		gi|CV56_1405|1374360_1374797|146aa
OG_1371	lipoprotein, putative	9	c235|FG2_0739|188_724|179aa@c235|FG2_0740|814_1035|74aa@	c223|HP_0525|189_725|179aa@c223|HP_0526|815_1036|74aa@	c202|LMG6897_1530|188_724|179aa@c202|LMG6897_1531|814_1035|74aa@	c23|B40_0692|19866_20453|196aa@c23|B40_0693|20492_20713|74aa@	gi|UC5099_1768|1673833_1674369|179aa@gi|UC5099_1769|1674459_1674680|74aa@	c16|DRA4_1842|3491_4078|196aa@c16|DRA4_1843|4117_4338|74aa	c16|SK110_1848|33437_33973|179aa@c16|SK110_1847|33126_33347|74aa@	gi|SK11_1917|1788953_1789540|196aa@gi|SK11_1918|1789579_1789800|74aa	gi|A76_0764|715349_715936|196aa@gi|A76_0763|715089_715310|74aa@	c2|KW10_0183|21038_21886|283aa	gi|KW2_1705|1801720_1802568|283aa	c8|N41_0067|63365_64213|283aa	c8|V4_0060|51356_52204|283aa	c6|NCDO763_1875|55003_55851|283aa	gi|MG1363_1985|1891862_1892710|283aa		c33|ATCC19435_0523|7412_8260|283aa	c0|E34_1658|236621_237469|283aa	c1|KF134_0482|88916_89764|283aa	c0|KF146_1668|187857_188705|283aa	c0|KF196_1701|233892_234740|283aa	c1|KF201_0497|92059_92907|283aa	c6|KF282_1026|36506_37354|283aa	c4|K231_0917|88929_89777|283aa	c4|KF24_0792|86092_86940|283aa	c2|K337_0140|5636_6484|283aa	c0|KF67_2054|88913_89761|283aa	c4|KF7_0911|157241_158089|283aa	c7|Li1_1399|94202_95050|283aa	c16|LMG14418_1714|6775_7599|275aa	c18|LMG8520_1311|294_1040|249aa	c1|LMG8526_0505|47390_48238|283aa	c5|LMG9446_1763|88893_89741|283aa	c2|LMG9449_1543|51401_52249|283aa	c0|M20_1057|113105_113953|283aa	c50|ML8_0996|9623_10471|283aa	c10|N42_2601|78633_79502|290aa	c47|AM2_0541|7138_7962|275aa	c4|UC317_0795|94980_95828|283aa	gi|KLDS_1916|1895299_1896123|275aa	gi|IL1403_1867|1787197_1788045|283aa	gi|IO1_1786|1863278_1864126|283aa	gi|CV56_1741|1714249_1715097|283aa
OG_1306	hypothetical protein	9	c74|FG2_0205|12502_12813|104aa@c74|FG2_0206|12817_12966|50aa	c63|HP_2257|12501_12812|104aa@c63|HP_2258|12816_12965|50aa	c62|LMG6897_2354|12501_12812|104aa@c62|LMG6897_2355|12816_12965|50aa	c22|B40_1545|29171_29482|104aa@c22|B40_1546|29486_29635|50aa	gi|UC5099_1900|1799613_1799924|104aa@gi|UC5099_1899|1799460_1799609|50aa	c27|DRA4_0567|29186_29497|104aa@c27|DRA4_0568|29501_29650|50aa	c28|SK110_2310|29186_29497|104aa@c28|SK110_2311|29501_29650|50aa	gi|SK11_2068|1929483_1929794|104aa@gi|SK11_2067|1929330_1929479|50aa	gi|A76_0575|550830_551141|104aa@gi|A76_0576|551145_551294|50aa	c5|KW10_1834|68321_68869|183aa	gi|KW2_1893|1985200_1985748|183aa	c4|N41_0799|46120_46668|183aa	c7|V4_1450|57304_57852|183aa	c9|NCDO763_1662|68381_68929|183aa	gi|MG1363_2110|2017303_2017851|183aa	c5|P7266_0939|70831_71379|183aa		c0|E34_1465|62576_63124|183aa	c1|KF134_0609|215083_215631|183aa	c0|KF146_1794|314022_314570|183aa	c0|KF196_1576|108024_108572|183aa	c1|KF201_0637|230301_230849|183aa	c10|KF282_2483|62499_63047|183aa	c12|K231_2220|55298_55846|183aa	c8|KF24_0060|55292_55840|183aa	c2|K337_0290|154475_155023|183aa	c0|KF67_2182|215080_215628|183aa	c12|KF7_2216|2505_3053|183aa	c11|Li1_1551|2547_3011|155aa	c21|LMG14418_1111|247_795|183aa	c11|LMG8520_0912|18021_18569|183aa	c1|LMG8526_0646|191507_192055|183aa	c12|LMG9446_2377|2522_3070|183aa	c34|LMG9449_1343|15713_16261|183aa	c22|M20_0375|26887_27435|183aa	c41|ML8_1569|2531_3079|183aa	c11|N42_0924|65004_65552|183aa	c22|AM2_0264|2280_2828|183aa	c38|UC317_1454|2280_2828|183aa	gi|KLDS_2058|2032520_2033068|183aa	gi|IL1403_1990|1912985_1913533|183aa	gi|IO1_1926|2004669_2005217|183aa	gi|CV56_1887|1853334_1853882|183aa
OG_230	Homoserine O-succinyltransferase (EC 2.3.1.46) - metA	9	c25|FG2_2620|13418_14104|229aa@c25|FG2_2621|14241_14378|46aa@	c37|HP_0253|13418_14104|229aa@c37|HP_0254|14241_14378|46aa@	c36|LMG6897_0015|13418_14104|229aa@c36|LMG6897_0016|14241_14378|46aa@	c29|B40_0743|13418_14377|320aa	gi|UC5099_1996|1894802_1895761|320aa	c33|DRA4_0516|13697_14350|218aa@c33|DRA4_0515|13483_13704|74aa	c35|SK110_1659|13632_14285|218aa@c35|SK110_1658|13418_13639|74aa@	gi|SK11_2212|2053694_2054347|218aa@gi|SK11_2213|2054340_2054561|74aa	gi|A76_2215|2048860_2049393|178aa@ gi|A76_2216|2049354_2049818|155aa@	c1|KW10_0343|10847_11806|320aa	gi|KW2_1974|2069089_2070048|320aa	c2|N41_1476|114124_114702|193aa@c2|N41_1477|114754_115083|110aa@	c6|V4_0891|10861_11820|320aa	c15|NCDO763_0628|42022_42981|320aa	gi|MG1363_2262|2149551_2150510|320aa	c4|P7266_1553|10253_11209|319aa	c9|ATCC19435_1592|10482_11441|320aa	c5|E34_2137|194902_195861|320aa	c16|KF134_1877|10460_11419|320aa	c11|KF146_1060|10459_11418|320aa	c3|KF196_1205|10460_11419|320aa	c17|KF201_1744|10464_11423|320aa	c2|KF282_0168|10474_11439|322aa	c2|K231_0189|10323_11282|320aa	c1|KF24_0141|10461_11420|320aa	c3|K337_1191|10477_11436|320aa	c7|KF67_1474|10464_11423|320aa	c3|KF7_1226|10460_11419|320aa	c2|Li1_0160|10460_11419|320aa	c35|LMG14418_1560|10433_11398|322aa	c8|LMG8520_0001|75_719|215aa@c59|LMG8520_1298|46_438|131aa@	c2|LMG8526_0177|10501_11466|322aa	c2|LMG9446_1268|10445_11404|320aa	c8|LMG9449_0012|10461_11420|320aa	c31|M20_2389|10487_11446|320aa	c9|ML8_0915|10438_11403|322aa	c3|N42_2271|10462_11421|320aa	c30|AM2_1860|10435_11400|322aa	c10|UC317_2350|10435_11400|322aa	gi|KLDS_2197|2155121_2156086|322aa	gi|IL1403_2075|1996691_1997656|322aa	gi|IO1_2007|2086559_2087524|322aa	gi|CV56_2027|1974342_1975307|322aa
OG_188	Pyridoxamine 5'-phosphate oxidase-related,FMN-binding	9	c84|FG2_1783|1304_1546|81aa@	c189|HP_0306|1304_1546|81aa@	c177|LMG6897_1647|1304_1546|81aa@	c176|B40_2129|1305_1547|81aa@	gi|UC5099_2198|2067461_2067865|135aa	c13|DRA4_1608|37821_38045|75aa@	c9|SK110_1627|37821_38045|75aa@	gi|SK11_2437|2241831_2242055|75aa@	gi|A76_2452|2251042_2251284|81aa@	c1|KW10_0518|165384_165761|126aa	gi|KW2_2162|2237616_2237993|126aa	c16|N41_1827|1144_1548|135aa	c10|V4_2336|33101_33478|126aa	c3|NCDO763_2109|1144_1548|135aa	gi|MG1363_2474|2337495_2337872|126aa	c5|P7266_0880|2025_2408|128aa	c5|ATCC19435_1764|33249_33626|126aa	c5|E34_1961|33241_33618|126aa	c5|KF134_2070|165690_166067|126aa	c4|KF146_0953|109715_110092|126aa	c3|KF196_1413|197738_198115|126aa	c4|KF201_0882|33250_33627|126aa	c2|KF282_0348|172682_173059|126aa		c59|KF24_1421|71_448|126aa	c3|K337_1369|172544_172921|126aa	c14|KF67_2587|10899_11276|126aa	c3|KF7_1410|178007_178183|59aa	c2|Li1_0368|191543_191920|126aa	c18|LMG14418_1295|33240_33617|126aa	c0|LMG8520_1081|83727_83969|81aa	c2|LMG8526_0424|214430_214807|126aa	c2|LMG9446_1447|173996_174373|126aa	c14|LMG9449_2717|94_336|81aa@	c8|M20_0068|48385_48762|126aa	c24|ML8_1176|29860_30237|126aa	c3|N42_2452|174442_174819|126aa	c25|AM2_2217|1184_1561|126aa	c23|UC317_1095|27097_27474|126aa	gi|KLDS_2401|2333550_2333927|126aa	gi|IL1403_2287|2180778_2181155|126aa	gi|IO1_2183|2246816_2247193|126aa	gi|CV56_2210|2138835_2139212|126aa
OG_732	2-hydroxy-3-oxopropionate reductase (EC1.1.1.60)	9	c18|FG2_0777|13047_13649|201aa@c18|FG2_0776|12768_13016|83aa@	c16|HP_2141|13041_13643|201aa@c16|HP_2140|12762_13010|83aa@	c19|LMG6897_0137|13047_13649|201aa@	c10|B40_1314|11359_11961|201aa@c10|B40_1313|11080_11328|83aa@	gi|UC5099_2302|2177550_2178152|201aa@	c2|DRA4_1419|25774_26376|201aa@c2|DRA4_1420|26407_26655|83aa	c2|SK110_1383|25774_26376|201aa@	gi|SK11_2544|2353451_2354053|201aa@gi|SK11_2545|2354084_2354332|83aa	gi|A76_2584|2380090_2380692|201aa@gi|A76_2585|2380723_2380971|83aa@	c13|KW10_0919|50211_51092|294aa	gi|KW2_2261|2347631_2348512|294aa	c14|N41_2606|37700_38581|294aa	c16|V4_1168|4047_4928|294aa	c21|NCDO763_1167|160_1041|294aa	gi|MG1363_2577|2451026_2451907|294aa	c13|P7266_1707|26772_27653|294aa	c17|ATCC19435_0462|11025_11906|294aa	c12|E34_2237|11067_11948|294aa	c10|KF134_2268|53413_54294|294aa	c13|KF146_1021|38254_39135|294aa	c11|KF196_1050|38254_39135|294aa	c14|KF201_2271|466_1347|294aa	c11|KF282_1720|11114_11995|294aa	c11|K231_1097|38346_39227|294aa	c6|KF24_1860|31698_32579|294aa	c14|K337_2332|20371_21252|294aa	c15|KF67_1393|36549_37430|294aa	c11|KF7_1033|38214_39095|294aa	c10|Li1_2309|38270_39151|294aa	c19|LMG14418_0263|31244_32125|294aa	c3|LMG8520_2253|41137_41985|283aa	c15|LMG8526_2419|4739_5620|294aa	c13|LMG9446_1517|16418_17299|294aa	c11|LMG9449_0892|38283_39164|294aa	c29|M20_1292|465_1346|294aa	c15|ML8_0338|14960_15841|294aa	c23|N42_1248|28067_28948|294aa	c33|AM2_0488|4866_5747|294aa	c26|UC317_0831|25105_25986|294aa	gi|KLDS_2572|2495905_2496786|294aa	gi|IL1403_2397|2298168_2299049|294aa	gi|IO1_2282|2358181_2359062|294aa	gi|CV56_2383|2300030_2300911|294aa
OG_2452	internalin, putative (LPXTG motif)	8										c2|KW10_0223|60979_62550|524aa	gi|KW2_1660|1758232_1759803|524aa		c8|V4_0015|8305_9186|294aa@ c8|V4_0014|8074_8280|69aa@c8|V4_0013|7860_8054|65aa@									c1|KF201_0453|48718_50085|456aa						c4|KF7_0873|119784_120764|327aa@c4|KF7_0874|120776_121150|125aa@			c28|LMG8520_2370|23770_25353|528aa@c82|LMG8520_0566|92_541|150aa				c0|M20_1013|69775_71142|456aa	c63|ML8_2253|4943_5557|205aa@c63|ML8_2252|4188_4820|211aa	c9|N42_1736|37783_39150|456aa	c0|AM2_1044|157895_158509|205aa@c0|AM2_1045|158632_159264|211aa	c0|UC317_0901|4942_5556|205aa@c0|UC317_0900|4187_4819|211aa@	gi|KLDS_1877|1857929_1859293|455aa	gi|IL1403_1828|1748664_1749278|205aa@gi|IL1403_1829|1749401_1750033|211aa@		gi|CV56_1701|1675711_1676325|205aa@gi|CV56_1702|1676448_1677080|211aa@
OG_2500	Potassium voltage-gated channel subfamily KQT;possible potassium channel, VIC family	8																c9|P7266_1866|244_594|117aa@				c24|KF146_2423|4482_4745|88aa@		c0|KF201_1648|207061_207648|196aa@		c1|K231_0594|197672_198445|258aa		c0|K337_1680|282565_283338|258aa			c1|Li1_0465|59652_60425|258aa	c105|LMG14418_1602|2016_2789|258aa				c4|LMG9449_0803|109384_110157|258aa		c12|ML8_2536|61395_61862|156aa@c12|ML8_2535|61090_61374|95aa@	c0|N42_0999|67353_68126|258aa	c27|AM2_0514|5354_5821|156aa@c27|AM2_0513|5049_5333|95aa	c7|UC317_2084|59336_59803|156aa@c7|UC317_2085|59824_60108|95aa@	gi|KLDS_0958|939086_939859|258aa	gi|IL1403_0988|937225_937692|156aa@gi|IL1403_0987|936920_937204|95aa@		gi|CV56_0944|920253_920720|156aa@gi|CV56_0943|919949_920194|82aa@
OG_237	Rossmann fold nucleotide-binding protein Smfpossibly involved in DNA uptake	8	c23|FG2_0689|17891_18739|283aa	c19|HP_0143|17893_18741|283aa	c24|LMG6897_1135|17893_18741|283aa	c7|B40_2412|27064_27912|283aa	gi|UC5099_1312|1231233_1232081|283aa	c39|DRA4_2539|9183_10031|283aa	c40|SK110_1469|9183_10031|283aa	gi|SK11_1313|1215144_1215992|283aa	gi|A76_1317|1221530_1222378|283aa	c3|KW10_1175|14853_15701|283aa	gi|KW2_1180|1241245_1242093|283aa	c21|N41_1166|7026_7874|283aa	c4|V4_1539|32550_32897|116aa@ c4|V4_1538|32048_32368|107aa@	c11|NCDO763_0874|48302_49150|283aa	gi|MG1363_1326|1243244_1244092|283aa	c12|P7266_1534|70394_71242|283aa	c1|ATCC19435_0135|10755_11639|295aa	c10|E34_2169|8274_9212|313aa	c0|KF134_1734|205504_206442|313aa	c1|KF146_0627|206475_207359|295aa	c4|KF196_0762|10735_11619|295aa	c11|KF201_1156|70748_71632|295aa	c0|KF282_1950|21428_22312|295aa	c10|K231_2105|5047_5931|295aa	c11|KF24_0900|7977_8861|295aa	c0|K337_1425|21267_22151|295aa	c3|KF67_1858|56829_57623|265aa@	c0|KF7_1729|327330_328214|295aa	c1|Li1_0739|373125_374009|295aa	c30|LMG14418_1802|24372_25310|313aa	c15|LMG8520_0641|38515_39252|246aa@	c0|LMG8526_1654|149367_150251|295aa	c1|LMG9446_0428|300506_301390|295aa	c32|LMG9449_1390|7514_8362|283aa	c14|M20_2628|8083_9021|313aa	c29|ML8_0694|16303_16920|206aa@c29|ML8_0695|16996_17187|64aa@	c27|N42_0577|12039_12737|233aa@	c16|AM2_1803|27257_28141|295aa	c30|UC317_1905|10733_11350|206aa@c30|UC317_1906|11426_11617|64aa@	gi|KLDS_1361|1336071_1337009|313aa	gi|IL1403_1342|1253570_1254037|156aa@gi|IL1403_1341|1253421_1253558|46aa@	gi|IO1_1170|1204290_1205138|283aa	gi|CV56_1276|1234622_1235203|194aa@gi|CV56_1277|1235279_1235470|64aa@
OG_1786	Cell envelope-associated transcriptionalattenuator LytR-CpsA-Psr, subfamily F2 (as inPMID19099556)	8																	c2|ATCC19435_1352|32870_33736|289aa@c2|ATCC19435_1353|33809_34168|120aa	c6|E34_1806|55292_56590|433aa	c2|KF134_0331|205428_206726|433aa	c3|KF146_1267|42776_44074|433aa	c1|KF196_0437|42854_44152|433aa	c0|KF201_1674|233347_234645|433aa	c0|KF282_2240|324812_326110|433aa	c1|K231_0621|224170_225468|433aa	c2|KF24_1464|4720_6018|433aa	c0|K337_1708|309941_311239|433aa	c1|KF67_0631|222032_223330|433aa	c0|KF7_1448|33113_34411|433aa	c1|Li1_0437|32873_33922|350aa@	c81|LMG14418_1818|94_1248|385aa@	c17|LMG8520_0403|13626_14855|410aa	c4|LMG8526_1006|145013_146311|433aa	c1|LMG9446_0163|27536_28834|433aa	c30|LMG9449_2120|11156_12454|433aa	c5|M20_1912|119848_121146|433aa	c12|ML8_2504|33806_34489|228aa@c12|ML8_2503|33191_33745|185aa	c0|N42_0971|39517_40815|433aa	c13|AM2_1454|21754_22437|228aa@c13|AM2_1455|22498_23052|185aa@	c21|UC317_1170|34030_34713|228aa@ c21|UC317_1169|33415_33969|185aa@	gi|KLDS_0925|909930_911228|433aa	gi|IL1403_0958|909635_910318|228aa@ gi|IL1403_0956|909021_909365|115aa@	gi|IO1_0874|904066_905364|433aa	gi|CV56_0912|892686_893369|228aa@ gi|CV56_0911|892071_892625|185aa@
OG_1815	Flagellar hook-length control protein FliK	8	c12|FG2_2657|10137_11750|538aa@	c13|HP_2035|10137_11750|538aa@	c15|LMG6897_0337|10136_11749|538aa@	c68|B40_1437|10137_12047|637aa	gi|UC5099_1456|1376380_1378290|637aa	c62|DRA4_2198|885_2795|637aa	c62|SK110_2180|10081_11991|637aa	gi|SK11_1516|1415741_1417651|637aa	gi|A76_1517|1405768_1407678|637aa	c14|KW10_2212|47623_49596|658aa	gi|KW2_1346|1428709_1430682|658aa	c17|N41_0483|16251_17597|449aa@c17|N41_0484|17621_17734|38aa@	c17|V4_0853|15783_17507|575aa@c17|V4_0854|17643_17756|38aa@	c12|NCDO763_2412|16284_17768|495aa@	gi|MG1363_1135|1051383_1052867|495aa@	c7|P7266_1448|100210_102204|665aa		c1|E34_0400|17594_19567|658aa				c12|KF201_2228|9663_11633|657aa	c14|KF282_2586|19770_21740|657aa							c51|LMG14418_0734|10062_12032|657aa	c45|LMG8520_1286|12886_15189|768aa					c44|ML8_1686|9668_11638|657aa	c24|N42_2092|9671_11641|657aa	c2|AM2_1319|55520_57490|657aa	c29|UC317_1200|11976_13946|657aa	gi|KLDS_1521|1506770_1508740|657aa	gi|IL1403_1476|1394446_1395570|375aa@	gi|IO1_1393|1453511_1455481|657aa	gi|CV56_1410|1377795_1379765|657aa
OG_126	Transcriptional regulator	8	c9|FG2_0954|9906_11024|373aa	c1|HP_0066|9906_11024|373aa	c1|LMG6897_0067|9906_11024|373aa	c3|B40_1253|19388_20506|373aa	gi|UC5099_2036|1929864_1930400|179aa@ gi|UC5099_2035|1929358_1929621|88aa@	c1|DRA4_0145|12475_13581|369aa	c1|SK110_0203|58453_59559|369aa	gi|SK11_2255|2089188_2090294|369aa	gi|A76_2258|2084439_2085557|373aa		gi|KW2_2007|2101396_2102556|387aa	c2|N41_1442|81640_82338|233aa@ c2|N41_1441|81179_81643|155aa@	c6|V4_0925|43606_44304|233aa@ c6|V4_0926|44301_44765|155aa@	c15|NCDO763_0592|9539_10237|233aa@c15|NCDO763_0591|9078_9542|155aa	gi|MG1363_2297|2182296_2183456|387aa		c9|ATCC19435_1629|43990_44496|169aa@	c5|E34_2101|161792_162952|387aa	c5|KF134_1930|35385_36545|387aa	c11|KF146_1096|43714_44874|387aa	c3|KF196_1241|43715_44875|387aa	c4|KF201_1029|161778_162452|225aa@	c2|KF282_0204|43371_44531|387aa	c2|K231_0225|43635_44795|387aa	c1|KF24_0177|43975_44481|169aa@	c3|K337_1227|43370_44530|387aa	c7|KF67_1510|43719_44879|387aa	c3|KF7_1264|43279_44439|387aa	c2|Li1_0196|43972_44436|155aa@	c29|LMG14418_1184|10329_11489|387aa	c8|LMG8520_0038|32603_33763|387aa	c2|LMG8526_0210|41294_42454|387aa	c2|LMG9446_1305|43702_44862|387aa	c8|LMG9449_0051|43970_44329|120aa	c3|M20_2357|123282_124442|387aa	c9|ML8_0952|43261_44421|387aa	c3|N42_2308|43716_44876|387aa	c1|AM2_0231|81298_82458|387aa	c10|UC317_2387|43258_44418|387aa	gi|KLDS_2234|2187946_2189106|387aa	gi|IL1403_2136|2044002_2045162|387aa	gi|IO1_2042|2119397_2120557|387aa	gi|CV56_2064|2007165_2008325|387aa
OG_2042	Integrase	8																			c3|KF134_1429|126278_126394|39aa@	c2|KF146_0199|60789_61907|373aa@ c2|KF146_0192|57273_57389|39aa@	c10|KF196_2133|20534_21652|373aa@c10|KF196_2127|17074_17190|39aa@		c1|KF282_0370|9529_10656|376aa		c0|KF24_1015|67685_68251|189aa@		c2|KF67_0402|188501_188617|39aa@	c5|KF7_1925|9710_9826|39aa@				c3|LMG8526_1369|86348_86464|39aa@	c0|LMG9446_1038|193952_194068|39aa@						c37|UC317_0469|13323_14450|376aa
OG_124	Quinone oxidoreductase (EC 1.6.5.5)	8	c8|FG2_1457|14431_15342|304aa	c20|HP_0026|6597_7508|304aa	c0|LMG6897_0528|17097_18008|304aa	c16|B40_2223|14045_14854|270aa@	gi|UC5099_0240|233948_234715|256aa@ gi|UC5099_0239|233806_233946|47aa@	c0|DRA4_1000|19442_20251|270aa@	c0|SK110_1045|110906_111715|270aa@	gi|SK11_0233|222746_223555|270aa@	gi|A76_0283|273066_273977|304aa	c6|KW10_1635|18671_19582|304aa	gi|KW2_0218|220915_221826|304aa	c1|N41_0299|108771_109682|304aa	c23|V4_2243|13270_13782|171aa@ c23|V4_2242|12972_13178|69aa@	c19|NCDO763_0337|20667_21578|304aa	gi|MG1363_0250|232743_233654|304aa		c0|ATCC19435_0949|70499_71410|304aa	c2|E34_0170|39137_40048|304aa	c3|KF134_1341|44175_45086|304aa	c2|KF146_0290|145744_146655|304aa	c14|KF196_2323|37127_38038|304aa	c2|KF201_0165|15223_16134|304aa	c1|KF282_0454|90546_91457|304aa	c0|K231_1621|253373_254284|304aa	c0|KF24_1104|150737_151648|304aa	c1|K337_0374|13944_14855|304aa	c2|KF67_0316|105053_105823|257aa@c2|KF67_0315|104923_105066|48aa@	c7|KF7_0700|69322_70233|304aa	c0|Li1_1969|199988_200899|304aa	c3|LMG14418_2117|36869_37780|304aa	c5|LMG8520_1850|80537_81448|304aa	c3|LMG8526_1280|3236_4147|304aa	c0|LMG9446_0947|111286_112197|304aa	c0|LMG9449_1177|253875_254786|304aa	c2|M20_1386|5066_5977|304aa	c11|ML8_0430|3342_4253|304aa	c1|N42_0168|13716_14627|304aa	c12|AM2_2392|48494_49405|304aa	c8|UC317_0005|3346_4257|304aa	gi|KLDS_0287|274281_275192|304aa	gi|IL1403_0263|233411_233629|73aa@ gi|IL1403_0265|234086_234322|79aa@	gi|IO1_0210|210707_211636|310aa	gi|CV56_0259|221178_222089|304aa
OG_1986	Poly(glycerol-phosphate)alpha-glucosyltransferase (EC 2.4.1.52)	8										c18|KW10_0158|27392_29017|542aa							c21|ATCC19435_1224|23533_25158|542aa	c1|E34_0439|57282_58907|542aa	c0|KF134_1549|7892_9517|542aa	c1|KF146_0435|7934_9559|542aa	c4|KF196_0954|208572_210197|542aa	c5|KF201_2035|126114_127154|347aa@	c23|KF282_2366|23948_25573|542aa		c26|KF24_0886|19775_21400|542aa	c5|K337_2016|102572_103501|310aa@	c9|KF67_0887|75345_76970|542aa	c1|KF7_0501|176364_177989|542aa	c3|Li1_1638|22603_24228|542aa	c17|LMG14418_0377|27911_29536|542aa	c27|LMG8520_0534|24283_24402|40aa@	c11|LMG8526_1101|6516_8141|542aa	c8|LMG9446_0103|97143_98078|312aa@c8|LMG9446_0104|98144_98767|208aa	c26|LMG9449_0854|21846_23471|542aa	c21|M20_1241|5040_5300|87aa@c21|M20_1242|7474_7899|142aa	c22|ML8_1528|5062_6687|542aa	c4|N42_0728|21759_23201|481aa@	c2|AM2_1358|94960_96585|542aa	c2|UC317_1380|106896_108338|481aa@	gi|KLDS_1561|1546241_1547866|542aa	gi|IL1403_1575|1476721_1478346|542aa	gi|IO1_1430|1490933_1492558|542aa	gi|CV56_1452|1418317_1419396|360aa@
OG_1747	FIG00755919: hypothetical protein	8	c201|FG2_0419|255_788|178aa@	c188|HP_2380|255_788|178aa@	c176|LMG6897_2040|257_790|178aa@	c96|B40_1552|4749_5453|235aa	gi|UC5099_2342|2219536_2220069|178aa@	c2|DRA4_1458|67530_68234|235aa	c2|SK110_1422|67530_68234|235aa	gi|SK11_2583|2395207_2395911|235aa	gi|A76_2624|2421897_2422601|235aa		gi|KW2_2307|2396307_2396645|113aa@gi|KW2_2306|2395941_2396207|89aa		c21|V4_2301|29863_30567|235aa				c35|ATCC19435_1676|7006_7710|235aa		c10|KF134_2225|1133_1837|235aa	c13|KF146_0987|1133_1837|235aa	c11|KF196_1016|1133_1837|235aa	c16|KF201_2078|1132_1836|235aa	c5|KF282_1180|71079_71783|235aa	c11|K231_1063|1130_1834|235aa	c61|KF24_1285|4752_5456|235aa	c13|K337_0970|17873_18577|235aa	c74|KF67_0910|56_589|178aa@c13|KF67_0808|64901_65434|178aa	c11|KF7_0998|1133_1837|235aa	c10|Li1_2275|1130_1834|235aa	c147|LMG14418_0512|1130_1834|235aa		c16|LMG8526_2182|25323_26027|235aa	c15|LMG9446_0541|1133_1837|235aa	c11|LMG9449_0858|1133_1837|235aa	c17|M20_0454|8720_9424|235aa	c47|ML8_0313|11522_12226|235aa	c25|N42_2521|25469_26173|235aa	c45|AM2_1204|11704_12237|178aa@	c47|UC317_0570|11522_12226|235aa	gi|KLDS_2630|2551722_2552426|235aa	gi|IL1403_2433|2339285_2339818|178aa@		gi|CV56_2460|2373002_2373706|235aa
OG_100	hypothetical protein	8	c175|FG2_0155|1879_2064|62aa@ c175|FG2_0154|1574_1876|101aa@	c161|HP_0193|774_959|62aa@ c161|HP_0194|962_1264|101aa@	c155|LMG6897_2128|1879_2064|62aa@ c155|LMG6897_2127|1574_1876|101aa@	c11|B40_0548|35334_35519|62aa@ c11|B40_0547|35029_35331|101aa@		c18|DRA4_1382|35051_35353|101aa@	c18|SK110_1348|35051_35353|101aa@	gi|SK11_0027|34547_34849|101aa@	gi|A76_0029|35877_36179|101aa@		gi|KW2_0028|35084_35575|164aa	c22|N41_0353|17702_18193|164aa	c9|V4_0795|64951_65442|164aa	c53|NCDO763_0683|3860_4351|164aa	gi|MG1363_0057|54401_54892|164aa																	c2|LMG8526_0249|78661_79128|156aa			c3|M20_2305|74016_74483|156aa
OG_1726	FIG00755780: hypothetical protein	8	c5|FG2_1034|23999_24730|244aa	c5|HP_1008|23998_24729|244aa	c6|LMG6897_2107|23999_24730|244aa	c26|B40_1862|3775_4509|245aa	gi|UC5099_0645|604207_604938|244aa	c7|DRA4_2123|23974_24450|159aa@c7|DRA4_2124|24453_24638|62aa	c7|SK110_2126|25994_26470|159aa@c7|SK110_2125|25806_25991|62aa@	gi|SK11_0621|579440_579916|159aa@	gi|A76_1990|1853885_1854169|95aa@	c4|KW10_0817|123194_123925|244aa	gi|KW2_0543|554950_555681|244aa						c4|ATCC19435_0654|28621_29352|244aa	c4|E34_0871|77143_77619|159aa@	c6|KF134_2157|63083_63814|244aa	c9|KF146_1195|61384_62115|244aa	c5|KF196_2001|63089_63820|244aa	c6|KF201_1848|79268_79999|244aa	c7|KF282_1488|59194_59925|244aa	c6|K231_1811|47125_47856|244aa	c5|KF24_1953|62871_63179|103aa@c5|KF24_1954|63210_63602|131aa@	c9|K337_1152|60696_61073|126aa@c9|K337_1151|60341_60640|100aa	c10|KF67_2423|47448_48179|244aa	c6|KF7_1861|61904_62635|244aa	c8|Li1_0062|52247_52978|244aa	c1|LMG14418_0138|18761_19492|244aa	c4|LMG8520_0773|26146_26523|126aa@	c7|LMG8526_0800|95850_96581|244aa	c6|LMG9446_1885|69116_69847|244aa	c3|LMG9449_2398|63621_64352|244aa	c4|M20_0798|81612_82343|244aa	c6|ML8_2131|22456_23187|244aa	c8|N42_0066|58119_58718|200aa	c5|AM2_1713|23834_24565|244aa	c17|UC317_0441|26260_26991|244aa	gi|KLDS_0661|624912_625643|244aa	gi|IL1403_0661|603398_604129|244aa	gi|IO1_0527|534041_534772|244aa	gi|CV56_0576|536419_537150|244aa
OG_194	FIG00755738: hypothetical protein	8	c28|FG2_2570|3082_3738|219aa	c22|HP_1472|3083_3739|219aa	c25|LMG6897_2435|19338_19994|219aa	c34|B40_1949|12438_12968|177aa@	gi|UC5099_0742|700911_701567|219aa	c8|DRA4_0031|30305_30961|219aa	c10|SK110_2401|30303_30959|219aa	gi|SK11_0731|693744_694400|219aa	gi|A76_1876|1748050_1748706|219aa	c4|KW10_0731|22789_23403|205aa	gi|KW2_0627|655743_656357|205aa	c15|N41_0689|46316_46570|85aa@ c15|N41_0690|46567_46929|121aa@	c1|V4_0420|31231_31845|205aa	c22|NCDO763_0300|24027_24281|85aa@c22|NCDO763_0301|24278_24640|121aa	gi|MG1363_1924|1834895_1835149|85aa@ gi|MG1363_1923|1834536_1834898|121aa@		c4|ATCC19435_0733|121594_122205|204aa	c4|E34_0949|169974_170585|204aa	c11|KF134_1156|35972_36583|204aa	c15|KF146_2509|10501_11112|204aa	c15|KF196_2353|10500_11111|204aa	c9|KF201_1217|54973_55584|204aa	c4|KF282_1540|7934_8545|204aa	c3|K231_1329|145460_145573|38aa@	c3|KF24_2259|10649_11068|140aa@	c10|K337_2162|40371_40991|207aa	c17|KF67_0933|10520_11131|204aa	c8|KF7_0066|73374_73985|204aa	c4|Li1_1503|116803_116916|38aa@	c43|LMG14418_1384|10680_11180|167aa@	c13|LMG8520_1561|20742_21353|204aa	c5|LMG8526_2021|43569_44180|204aa	c3|LMG9446_2135|32956_33567|204aa	c1|LMG9449_0280|142077_142688|204aa	c15|M20_0658|35795_36406|204aa	c7|ML8_2297|9232_9843|204aa	c5|N42_1893|43956_44567|204aa	c40|AM2_1392|8250_8861|204aa	c14|UC317_2520|9231_9842|204aa	gi|KLDS_0743|718024_718605|194aa	gi|IL1403_0770|718328_718939|204aa	gi|IO1_0675|691972_692583|204aa	gi|CV56_0722|698273_698884|204aa
OG_1231	Bacterial cell division membrane protein	8	c143|FG2_0396|1395_1904|170aa	c128|HP_1159|1395_1904|170aa	c120|LMG6897_1606|1395_1904|170aa	c107|B40_1510|1418_1927|170aa	gi|UC5099_0958|903304_903801|166aa	c74|DRA4_0378|6266_6775|170aa	c75|SK110_0381|6266_6775|170aa	gi|SK11_0941|893025_893582|186aa	gi|A76_1663|1546341_1546898|186aa	c7|KW10_0678|107093_107602|170aa	gi|KW2_0831|873179_873688|170aa	c6|N41_1820|97612_97965|118aa@c6|N41_1819|97457_97648|64aa@	c5|V4_1008|1485_1994|170aa	c43|NCDO763_1485|10611_10964|118aa@c43|NCDO763_1484|10456_10647|64aa	gi|MG1363_1728|1643190_1643381|64aa@	c10|P7266_1337|81209_81718|170aa	c2|ATCC19435_1338|22290_22799|170aa	c6|E34_1794|44714_45223|170aa	c2|KF134_0352|226845_227354|170aa	c3|KF146_1245|22442_22660|73aa@	c1|KF196_0416|22519_22737|73aa@	c0|KF201_1687|244847_245356|170aa	c0|KF282_2260|346225_346734|170aa		c52|KF24_0672|4221_4730|170aa	c0|K337_1729|331358_331867|170aa	c35|KF67_0893|1067_1576|170aa	c0|KF7_1435|22407_22916|170aa	c1|Li1_0424|22166_22675|170aa	c10|LMG14418_2262|30530_30748|73aa@	c35|LMG8520_1698|11428_11937|170aa	c4|LMG8526_1030|170710_171219|170aa	c1|LMG9446_0142|6909_7418|170aa	c28|LMG9449_2488|6845_7354|170aa	c56|M20_2610|687_1196|170aa	c12|ML8_2489|22482_22991|170aa	c0|N42_0957|28810_29319|170aa	c13|AM2_1468|33253_33762|170aa	c21|UC317_1156|22997_23215|73aa@	gi|KLDS_0911|899513_899731|73aa@	gi|IL1403_0943|898311_898820|170aa	gi|IO1_0847|875255_875764|170aa	gi|CV56_0898|881363_881872|170aa
OG_94	Malolactic enzyme (EC 1.-.-.-)	8	c67|FG2_2054|1009_2481|491aa@c67|FG2_2055|2512_2631|40aa@	c59|HP_0745|1009_2481|491aa@c59|HP_0746|2512_2631|40aa@	c58|LMG6897_1179|1009_2481|491aa@c58|LMG6897_1180|2512_2631|40aa@	c58|B40_1184|2571_4043|491aa@c58|B40_1185|4074_4193|40aa	gi|UC5099_0989|928436_930058|541aa	c52|DRA4_0720|12132_12911|260aa@c52|DRA4_0721|13047_13439|131aa@c52|DRA4_0722|13506_13754|83aa	c37|SK110_0438|12132_12911|260aa@ c37|SK110_0439|13047_13754|236aa@	gi|SK11_0975|919565_920278|238aa@gi|SK11_0973|918656_919237|194aa	gi|A76_1634|1521846_1522823|326aa@ gi|A76_1633|1521201_1521827|209aa@	c7|KW10_0655|85784_87406|541aa	gi|KW2_0856|893364_894986|541aa	c6|N41_1793|72499_74121|541aa	c5|V4_1032|21660_23282|541aa	c16|NCDO763_1722|29301_30923|541aa	gi|MG1363_1699|1615293_1616915|541aa	c1|P7266_1106|88171_89793|541aa	c2|ATCC19435_1368|45614_47236|541aa	c6|E34_1820|68035_69657|541aa	c2|KF134_0317|192352_193974|541aa	c3|KF146_1281|55524_57146|541aa	c1|KF196_0451|55602_57224|541aa	c0|KF201_1661|221375_222997|541aa	c0|KF282_2226|311743_313365|541aa	c1|K231_0607|211102_212724|541aa	c2|KF24_1478|17467_19089|541aa	c0|K337_1693|296885_298507|541aa	c1|KF67_0617|208956_210578|541aa	c0|KF7_1463|45854_47476|541aa	c1|Li1_0452|45372_46994|541aa	c83|LMG14418_1932|6862_8484|541aa	c17|LMG8520_0419|26181_27803|541aa	c4|LMG8526_0992|131944_133566|541aa	c1|LMG9446_0177|40280_41902|541aa	c4|LMG9449_0816|122812_124434|541aa	c5|M20_1897|106783_108405|541aa	c12|ML8_2520|45936_47558|541aa	c0|N42_0985|52189_53811|541aa	c13|AM2_1439|8684_10306|541aa	c7|UC317_2100|73640_75262|541aa	gi|KLDS_0944|923926_925548|541aa	gi|IL1403_0973|921766_923388|541aa	gi|IO1_0889|916814_918436|541aa	gi|CV56_0928|904820_906442|541aa
OG_2827	hypothetical protein	8												c7|N41_2187|85430_86236|269aa@c7|N41_2186|84972_85436|155aa@											c3|KF282_1865|87871_89136|422aa	c5|K231_1933|45791_45907|39aa@	c9|KF24_1795|44943_45059|39aa@	c5|K337_1968|44966_45082|39aa@		c1|KF7_0549|233000_233116|39aa@	c3|Li1_1690|84517_84633|39aa@			c9|LMG8526_1232|67435_68700|422aa		c7|LMG9449_2264|57340_57456|39aa@	c9|M20_1698|43139_43255|39aa@
OG_208	NADH dehydrogenase (EC 1.6.99.3)	8	c76|FG2_1064|704_1327|208aa	c61|HP_1857|1478_2101|208aa	c60|LMG6897_1352|11662_12285|208aa	c56|B40_2597|2182_2805|208aa	gi|UC5099_1559|1471546_1472169|208aa	c10|DRA4_2397|15663_16085|141aa@	c12|SK110_2433|15663_16085|141aa@	gi|SK11_1642|1529329_1529751|141aa@	gi|A76_0990|937121_937543|141aa@	c10|KW10_2047|96372_96995|208aa	gi|KW2_1482|1576659_1577282|208aa	c10|N41_2480|76298_76720|141aa@	c2|V4_0339|125757_126380|208aa	c5|NCDO763_1817|73700_74122|141aa@	gi|MG1363_1009|942840_943262|141aa@	c1|P7266_1154|130858_131481|208aa	c6|ATCC19435_1961|91036_91659|208aa	c1|E34_0521|157063_157686|208aa	c8|KF134_0018|15937_16560|208aa	c7|KF146_0760|15937_16560|208aa	c9|KF196_1125|15937_16560|208aa	c5|KF201_1966|44751_45374|208aa	c3|KF282_1838|56234_56857|208aa	c5|K231_1906|14051_14674|208aa	c9|KF24_1767|13241_13864|208aa	c5|K337_1941|14199_14822|208aa	c6|KF67_1000|15959_16582|208aa	c1|KF7_0575|263266_263889|208aa	c3|Li1_1717|115759_116382|208aa	c2|LMG14418_1350|56933_57556|208aa	c46|LMG8520_2571|8147_8503|119aa@ c46|LMG8520_2572|8500_8769|90aa@	c9|LMG8526_1259|99079_99702|208aa	c9|LMG9446_1619|80547_81170|208aa	c7|LMG9449_2292|88576_89199|208aa	c9|M20_1672|12374_12997|208aa	c8|ML8_1470|12873_13496|208aa	c4|N42_0811|122643_123266|208aa	c3|AM2_2088|16579_17202|208aa	c2|UC317_1306|14645_15268|208aa	gi|KLDS_1643|1643328_1643951|208aa	gi|IL1403_1650|1570868_1571491|208aa	gi|IO1_1520|1604044_1604667|208aa	gi|CV56_1525|1500646_1501269|208aa
OG_2411	Oxygen-insensitive NAD(P)H nitroreductase	8	c55|FG2_0415|9008_9352|115aa@c55|FG2_0414|8724_8921|66aa@	c0|HP_0624|84584_84928|115aa@c0|HP_0625|85015_85212|66aa@	c0|LMG6897_0626|109016_109360|115aa@c0|LMG6897_0627|109447_109644|66aa@	c0|B40_0625|70331_70675|115aa@c0|B40_0626|70762_70959|66aa@	gi|UC5099_0137|134932_135306|125aa@gi|UC5099_0136|134660_134857|66aa@	c0|DRA4_1093|111513_111857|115aa@c0|DRA4_1094|111944_112141|66aa	c0|SK110_0951|19300_19644|115aa@c0|SK110_0950|19016_19213|66aa@	gi|SK11_0139|131139_131483|115aa@gi|SK11_0138|130855_131052|66aa	gi|A76_0182|174058_174687|210aa		gi|KW2_0126|127276_127914|213aa	c1|N41_0211|27241_27879|213aa	c22|V4_0569|3335_3964|210aa	c4|NCDO763_0760|60292_60930|213aa	gi|MG1363_0161|151041_151679|213aa
OG_2146	Transcriptional regulator, DeoR family	8	c21|FG2_2008|7619_8269|217aa@c21|FG2_2009|8374_8556|61aa@	c28|HP_2420|17875_18525|217aa@c28|HP_2419|17588_17770|61aa@	c2|LMG6897_0833|37464_38114|217aa@c2|LMG6897_0834|38219_38401|61aa@	c2|B40_0853|37392_38330|313aa	gi|UC5099_0452|435095_435298|68aa@ gi|UC5099_0453|435458_435745|96aa@gi|UC5099_0454|435850_436032|61aa@	c40|DRA4_1504|2806_3456|217aa@c40|DRA4_1505|3561_3743|61aa	c5|SK110_1796|37466_38116|217aa@c5|SK110_1797|38221_38403|61aa@	gi|SK11_0460|432586_433236|217aa@gi|SK11_0461|433341_433523|61aa	gi|A76_0483|462318_462968|217aa@gi|A76_0484|463073_463255|61aa@	c0|KW10_1394|83487_84425|313aa	gi|KW2_0405|412798_413736|313aa	c11|N41_0941|43511_44449|313aa	c0|V4_2079|171427_172365|313aa	c0|NCDO763_0932|47289_48227|313aa	gi|MG1363_0448|424278_425216|313aa								c36|KF282_0092|4010_4942|311aa																			gi|IO1_0395|399796_400734|313aa
OG_1339	Citrate synthase (si) (EC 2.3.3.1)	8	c102|FG2_2707|8067_8780|238aa@c102|FG2_2706|7456_7950|165aa@	c97|HP_1688|8067_8780|238aa@c97|HP_1687|7456_7950|165aa@	c93|LMG6897_0171|8067_8780|238aa@c93|LMG6897_0170|7456_7950|165aa@	c24|B40_1135|7992_8705|238aa@c24|B40_1134|7380_7976|199aa	gi|UC5099_0688|651950_652975|342aa@gi|UC5099_0689|653033_653275|81aa@	c51|DRA4_0755|7658_8629|324aa@c51|DRA4_0754|7305_7661|119aa	c52|SK110_0678|7658_8629|324aa@c52|SK110_0677|7305_7661|119aa@	gi|SK11_0677|641581_642552|324aa@	gi|A76_1930|1794327_1795652|442aa	c4|KW10_0771|70109_71434|442aa	gi|KW2_0584|606436_607761|442aa	c24|N41_2050|16410_17735|442aa	c18|V4_0189|17660_18985|442aa	c27|NCDO763_0540|13606_14931|442aa	gi|MG1363_0657|628261_629586|442aa		c4|ATCC19435_0692|72154_73479|442aa	c4|E34_0909|120465_121790|442aa	c6|KF134_2119|18909_20234|442aa	c12|KF146_2369|15378_16703|442aa	c5|KF196_1963|18915_20240|442aa	c6|KF201_1810|35093_36418|442aa	c18|KF282_0140|16051_17376|442aa	c6|K231_1849|90692_92017|442aa	c5|KF24_1915|18697_20022|442aa	c15|K337_2382|18908_20233|442aa	c21|KF67_2352|15378_16703|442aa	c6|KF7_1899|105485_106810|442aa	c4|Li1_1422|20641_21966|442aa	c82|LMG14418_0546|60_1385|442aa	c20|LMG8520_0153|16856_18181|442aa	c7|LMG8526_0762|51684_53009|442aa	c6|LMG9446_1847|24942_26267|442aa	c3|LMG9449_2436|107198_108523|442aa	c4|M20_0760|37440_38765|442aa	c7|ML8_2341|58032_59357|442aa	c5|N42_1934|92755_94080|442aa	c14|AM2_2483|40142_41467|442aa	c25|UC317_2321|20639_21964|442aa	gi|KLDS_0700|668490_669815|442aa	gi|IL1403_0722|667181_668506|442aa	gi|IO1_0565|577608_578933|442aa	gi|CV56_0619|582733_584058|442aa
OG_134	Aconitate hydratase (EC 4.2.1.3)	8	c102|FG2_2704|5295_6308|338aa@ c102|FG2_2705|6305_7459|385aa@c102|FG2_2703|4913_5278|122aa@	c97|HP_1685|5295_6308|338aa@ c97|HP_1686|6305_7459|385aa@c97|HP_1684|4913_5278|122aa@	c93|LMG6897_0168|5295_6308|338aa@ c93|LMG6897_0169|6305_7459|385aa@c93|LMG6897_0167|4913_5278|122aa@	c24|B40_1133|4837_7383|849aa	gi|UC5099_0690|653272_655818|849aa	c51|DRA4_0753|5551_7308|586aa@c51|DRA4_0752|4762_5466|235aa	c52|SK110_0676|5551_7308|586aa@c52|SK110_0675|4762_5466|235aa@	gi|SK11_0679|642902_644659|586aa@gi|SK11_0680|644744_645448|235aa	gi|A76_1929|1792354_1794330|659aa@gi|A76_1928|1791785_1792288|168aa@	c4|KW10_0770|67566_70112|849aa	gi|KW2_0585|607758_610304|849aa	c24|N41_2049|13867_16413|849aa	c18|V4_0188|15117_17663|849aa	c27|NCDO763_0539|11063_13609|849aa	gi|MG1363_0658|629583_632129|849aa		c4|ATCC19435_0693|73476_76022|849aa	c4|E34_0910|121787_124333|849aa	c6|KF134_2118|16366_18912|849aa	c12|KF146_2370|16700_19246|849aa	c5|KF196_1962|16372_18918|849aa	c6|KF201_1809|32550_35096|849aa	c18|KF282_0141|17373_19919|849aa	c6|K231_1850|92014_94560|849aa	c5|KF24_1914|16154_18700|849aa	c15|K337_2381|16365_18911|849aa	c21|KF67_2353|16700_19246|849aa	c6|KF7_1900|106807_109353|849aa	c4|Li1_1423|21963_24509|849aa	c82|LMG14418_0547|1382_3928|849aa	c20|LMG8520_0155|18773_20365|531aa@ c20|LMG8520_0154|18178_18744|189aa@c20|LMG8520_0156|20407_20742|112aa@	c7|LMG8526_0761|49141_51687|849aa	c6|LMG9446_1846|22399_24945|849aa	c3|LMG9449_2437|108520_111066|849aa	c4|M20_0759|34897_37443|849aa	c7|ML8_2340|55489_58035|849aa	c5|N42_1933|90212_92758|849aa	c14|AM2_2482|37599_40145|849aa	c25|UC317_2322|21961_24507|849aa	gi|KLDS_0701|669812_672358|849aa	gi|IL1403_0723|668503_671049|849aa	gi|IO1_0566|578930_581476|849aa	gi|CV56_0620|584055_586601|849aa
OG_952	FIG00755080: hypothetical protein	8	c67|FG2_2068|12940_13380|147aa@	c59|HP_0759|12940_13380|147aa@	c58|LMG6897_1193|12940_13380|147aa@	c58|B40_1198|14506_15135|210aa	gi|UC5099_0976|917684_918124|147aa@	c52|DRA4_0707|1191_1820|210aa	c37|SK110_0425|1191_1820|210aa	gi|SK11_0960|907715_908344|210aa	gi|A76_1647|1533137_1533577|147aa@	c7|KW10_0667|97719_98345|209aa	gi|KW2_0843|882625_883065|147aa@	c6|N41_1805|84415_84855|147aa@	c5|V4_1020|10738_11367|210aa	c16|NCDO763_1734|41217_41657|147aa	gi|MG1363_1711|1627209_1627649|147aa@	c3|P7266_0127|17337_17981|215aa	c2|ATCC19435_1355|34701_35330|210aa	c6|E34_1808|57122_57751|210aa	c2|KF134_0329|204266_204895|210aa	c3|KF146_1269|44607_45236|210aa	c1|KF196_0439|44685_45314|210aa	c0|KF201_1672|232184_232813|210aa	c0|KF282_2238|323649_324278|210aa	c1|K231_0619|223007_223636|210aa	c2|KF24_1466|6551_7180|210aa	c0|K337_1706|308779_309408|210aa	c1|KF67_0629|220870_221499|210aa	c0|KF7_1450|34944_35573|210aa	c1|Li1_0439|34455_35084|210aa	c81|LMG14418_1820|1786_2415|210aa	c17|LMG8520_0405|15389_16018|210aa	c4|LMG8526_1004|143850_144479|210aa	c1|LMG9446_0165|29367_29996|210aa	c30|LMG9449_2118|9994_10623|210aa	c5|M20_1910|118685_119314|210aa	c12|ML8_2506|35027_35656|210aa	c0|N42_0973|41348_41977|210aa	c13|AM2_1452|20587_21216|210aa	c7|UC317_2114|85542_86171|210aa	gi|KLDS_0927|911766_912395|210aa	gi|IL1403_0960|910856_911485|210aa	gi|IO1_0876|905896_906525|210aa	gi|CV56_0914|893907_894536|210aa
OG_1620	FIG00756392: hypothetical protein	8	c158|FG2_1000|3246_3626|127aa@	c145|HP_1807|3246_3626|127aa@	c137|LMG6897_0188|3246_3626|127aa@	c70|B40_0435|8654_9295|214aa	gi|UC5099_1002|940568_941209|214aa	c144|DRA4_2179|471_803|111aa@	c141|SK110_1482|471_803|111aa@	gi|SK11_0987|931681_932013|111aa@	gi|A76_1623|1510477_1511118|214aa	c7|KW10_0645|75051_75704|218aa	gi|KW2_0877|913828_914469|214aa	c6|N41_1783|61811_62452|214aa	c5|V4_1042|33329_33970|214aa	c16|NCDO763_1712|18612_19253|214aa	gi|MG1363_1689|1604605_1605246|214aa		c2|ATCC19435_1377|55116_55769|218aa	c6|E34_1828|77536_78189|218aa	c2|KF134_0309|183818_184471|218aa	c3|KF146_1289|65027_65680|218aa	c1|KF196_0459|65105_65758|218aa	c0|KF201_1653|212843_213496|218aa	c0|KF282_2218|303210_303863|218aa	c1|K231_0599|202571_203224|218aa	c2|KF24_1487|26969_27622|218aa	c0|K337_1685|288348_289001|218aa	c1|KF67_0608|200421_201074|218aa	c0|KF7_1471|55355_56008|218aa	c1|Li1_0460|54873_55526|218aa	c152|LMG14418_1952|1018_1671|218aa	c17|LMG8520_0430|35954_36313|120aa@c17|LMG8520_0429|35661_35792|44aa@	c4|LMG8526_0984|123239_123892|218aa	c1|LMG9446_0185|49783_50436|218aa	c4|LMG9449_0808|114282_114935|218aa	c5|M20_1889|98249_98902|218aa	c12|ML8_2528|55437_56090|218aa	c0|N42_0993|61689_62261|191aa@	c13|AM2_1431|152_805|218aa	c7|UC317_2092|65108_65761|218aa	gi|KLDS_0952|933424_934077|218aa	gi|IL1403_0981|931283_931921|213aa	gi|IO1_0897|926312_926965|218aa	gi|CV56_0936|914320_914973|218aa
OG_1742	Lactate 2-monooxygenase (EC 1.13.12.4)	8	c144|FG2_2515|3701_3907|69aa@	c130|HP_2278|3703_3909|69aa@	c124|LMG6897_1683|3701_3907|69aa@	c7|B40_2419|35356_35562|69aa@		c39|DRA4_2546|17452_17658|69aa@	c40|SK110_1476|17452_17658|69aa@	gi|SK11_1306|1207517_1207723|69aa@	gi|A76_1310|1213880_1214086|69aa@	c3|KW10_1193|40120_41220|367aa	gi|KW2_1188|1252976_1254076|367aa		c4|V4_1548|43789_44889|367aa			c1|P7266_1022|2203_3303|367aa	c1|ATCC19435_0176|51397_52497|367aa	c7|E34_0654|14075_15175|367aa	c0|KF134_1705|167739_168839|367aa	c1|KF146_0591|167768_168868|367aa	c4|KF196_0798|49258_50358|367aa	c7|KF201_0836|98096_99196|367aa	c19|KF282_0754|20062_21162|367aa	c7|K231_0807|123364_124464|367aa	c18|KF24_1448|20064_21164|367aa	c6|K337_1899|96898_97998|367aa	c3|KF67_1894|96259_97359|367aa	c1|KF7_0344|14552_15652|367aa	c5|Li1_1079|16530_17630|367aa	c118|LMG14418_1299|2784_3884|367aa		c0|LMG8526_1677|175811_176911|367aa	c11|LMG9446_0807|58180_59280|367aa	c5|LMG9449_2044|96645_97745|367aa	c40|M20_1550|131_1231|367aa	c65|ML8_1203|222_1322|367aa	c2|N42_1420|14548_15648|367aa	c15|AM2_0635|57887_58987|367aa		gi|KLDS_1386|1366068_1367168|367aa	gi|IL1403_1364|1278985_1280085|367aa	gi|IO1_1244|1291800_1292900|367aa	gi|CV56_1299|1262632_1263732|367aa
OG_1944	Acetyl xylan esterase 1; Cephalosporin-Cdeacetylase (EC 3.1.1.41)	8	c12|FG2_2669|22294_22947|218aa@c12|FG2_2670|23085_23231|49aa@	c13|HP_2047|22294_22947|218aa@c13|HP_2048|23085_23231|49aa@	c15|LMG6897_0349|22293_22946|218aa@c15|LMG6897_0350|23084_23230|49aa@	c64|B40_2287|7386_8039|218aa@c64|B40_2288|8177_8323|49aa	gi|UC5099_1443|1363619_1364557|313aa	c4|DRA4_0810|11216_11725|170aa@c4|DRA4_0811|11863_12009|49aa	c4|SK110_0765|11216_11725|170aa@c4|SK110_0766|11863_12009|49aa@	gi|SK11_1501|1402110_1402619|170aa@gi|SK11_1500|1401826_1401972|49aa	gi|A76_1495|1387773_1388711|313aa	c14|KW10_2200|34921_35859|313aa	gi|KW2_1334|1416008_1416946|313aa		c17|V4_0866|29517_30455|313aa					c1|E34_0391|8856_9794|313aa	c0|KF134_1594|49457_50395|313aa	c1|KF146_0479|49499_50437|313aa	c4|KF196_0909|167694_168632|313aa		c14|KF282_2598|33448_34386|313aa		c17|KF24_0473|8857_9795|313aa		c9|KF67_0842|34467_35405|313aa	c1|KF7_0458|135638_136576|313aa	c15|Li1_1291|24832_25767|312aa		c54|LMG8520_2080|9158_9718|187aa@c54|LMG8520_2079|8780_9016|79aa@	c11|LMG8526_1144|48248_49186|313aa	c8|LMG9446_0057|56268_57206|313aa	c18|LMG9449_1462|10789_11727|313aa	c25|M20_2463|20575_21513|313aa
OG_1649	Ribose ABC transport system, permease proteinRbsC (TC 3.A.1.2.1)	8	c2|FG2_0838|41128_41901|258aa@c2|FG2_0839|41901_42071|57aa@	c140|HP_0181|1708_2487|260aa@c140|HP_0180|1538_1708|57aa@	c133|LMG6897_0454|1708_2487|260aa@c133|LMG6897_0453|1538_1708|57aa@	c4|B40_1802|2625_3398|258aa@c4|B40_1801|2455_2625|57aa@		c15|DRA4_0622|1469_2248|260aa@c15|DRA4_0621|1299_1469|57aa	c15|SK110_0622|37801_38574|258aa@c15|SK110_0623|38574_38744|57aa@	gi|SK11_1825|1694345_1695124|260aa@gi|SK11_1824|1694175_1694345|57aa	gi|A76_0857|808801_809574|258aa@gi|A76_0858|809574_809744|57aa@	c2|KW10_0286|131000_131941|314aa	gi|KW2_1599|1690568_1691515|316aa	c5|N41_1949|58671_59612|314aa	c13|V4_0721|59820_60767|316aa	c7|NCDO763_2078|59105_60046|314aa	gi|MG1363_0818|776908_777855|316aa		c8|ATCC19435_0027|26891_27832|314aa	c1|E34_0630|267736_268677|314aa	c12|KF134_2355|51481_52422|314aa	c0|KF146_1571|84211_85152|314aa	c12|KF196_2219|13842_14783|314aa	c15|KF201_2316|13838_14779|314aa	c15|KF282_1392|13837_14778|314aa	c14|K231_2256|13837_14778|314aa	c36|KF24_0077|1472_2413|314aa	c12|K337_2215|13848_14789|314aa	c16|KF67_1184|13839_14780|314aa	c4|KF7_0817|57912_58853|314aa	c19|Li1_0775|13840_14781|314aa	c28|LMG14418_2177|13836_14777|314aa		c6|LMG8526_1967|173107_174048|314aa	c7|LMG9446_1998|13840_14781|314aa	c39|LMG9449_2702|1716_2657|314aa	c0|M20_0958|8144_9085|314aa	c0|ML8_0553|54763_55704|314aa	c13|N42_1680|47535_48476|314aa	c0|AM2_0987|94074_95015|314aa	c0|UC317_0958|68504_69445|314aa	gi|KLDS_1815|1790574_1791515|314aa	gi|IL1403_1769|1683548_1684489|314aa	gi|IO1_1685|1757361_1758302|314aa	gi|CV56_1642|1611809_1612750|314aa
OG_640	6-phospho-beta-glucosidase (EC 3.2.1.86)	8	c2|FG2_0799|2407_3153|249aa@c2|FG2_0800|3160_3840|227aa@	c67|HP_1957|9645_10463|273aa@c67|HP_1956|8958_9638|227aa@	c65|LMG6897_1208|2335_3153|273aa@c65|LMG6897_1209|3160_3840|227aa@	c4|B40_1841|40686_42119|478aa	gi|UC5099_1712|1617375_1618808|478aa	c38|DRA4_1540|20740_21792|351aa@c15|DRA4_0658|39528_39893|122aa	c39|SK110_2515|64_1116|351aa@c15|SK110_0587|151_516|122aa@	gi|SK11_1864|1733792_1734844|351aa@gi|SK11_1862|1732404_1732769|122aa	gi|A76_0821|770079_771512|478aa	c2|KW10_0250|92707_94140|478aa	gi|KW2_1634|1728658_1730091|478aa	c5|N41_1913|20087_21520|478aa	c13|V4_0686|21232_22665|478aa	c7|NCDO763_2042|20521_21954|478aa	gi|MG1363_0781|738330_739763|478aa	c9|P7266_1876|13269_14702|478aa	c8|ATCC19435_0061|64846_66279|478aa	c0|E34_1721|303526_304959|478aa	c1|KF134_0418|23232_24665|478aa	c0|KF146_1605|122172_123605|478aa	c0|KF196_1764|298991_300424|478aa	c1|KF201_0431|22885_24318|478aa	c12|KF282_2543|25393_26826|478aa	c4|K231_0986|159670_161103|478aa	c4|KF24_0721|14776_16209|478aa	c8|K337_0020|22889_24322|478aa	c0|KF67_1992|23229_24662|478aa	c4|KF7_0853|95781_97214|478aa	c7|Li1_1328|22890_24323|478aa	c31|LMG14418_2148|5320_6348|343aa@c31|LMG14418_2147|4914_5279|122aa@	c57|LMG8520_0691|221_1654|478aa	c13|LMG8526_1075|22895_24328|478aa	c5|LMG9446_1701|23259_24692|478aa	c23|LMG9449_1302|6114_7547|478aa	c0|M20_0992|45724_47157|478aa	c0|ML8_0589|92891_94324|478aa	c9|N42_1758|63548_64981|478aa	c0|AM2_1022|132135_133568|478aa	c0|UC317_0923|29883_31316|478aa	gi|KLDS_1852|1830298_1831326|343aa@gi|KLDS_1851|1829892_1830257|122aa	gi|IL1403_1804|1721677_1723110|478aa	gi|IO1_1721|1795688_1797121|478aa	gi|CV56_1678|1649952_1651385|478aa
OG_1140	Dihydrofolate reductase (EC 1.5.1.3)	8	c101|FG2_1746|2644_3024|127aa@c101|FG2_1747|2997_3164|56aa@	c96|HP_1509|2645_3025|127aa@c96|HP_1510|2998_3165|56aa@	c91|LMG6897_2228|2644_3024|127aa@c91|LMG6897_2229|2997_3164|56aa@	c3|B40_1236|6663_7088|142aa@c3|B40_1235|6523_6690|56aa@	gi|UC5099_2018|1916642_1917028|129aa	c84|DRA4_0726|75_461|129aa@c84|DRA4_0727|434_601|56aa	c85|SK110_1296|75_461|129aa@c85|SK110_1297|434_601|56aa@	gi|SK11_2237|2075445_2075831|129aa@gi|SK11_2236|2075305_2075472|56aa	gi|A76_2240|2070715_2071101|129aa@gi|A76_2239|2070575_2070742|56aa@	c1|KW10_0366|31992_32513|174aa	gi|KW2_1995|2089785_2090306|174aa	c2|N41_1454|93428_93949|174aa	c6|V4_0913|31995_32516|174aa	c15|NCDO763_0605|21326_21847|174aa	gi|MG1363_2285|2170685_2171206|174aa	c4|P7266_1572|29059_29595|179aa	c9|ATCC19435_1620|35023_35544|174aa	c5|E34_2111|171201_171722|174aa	c5|KF134_1921|26616_27137|174aa	c11|KF146_1087|34945_35466|174aa	c3|KF196_1232|34945_35466|174aa	c4|KF201_1038|170700_171221|174aa	c2|KF282_0195|34601_35122|174aa	c2|K231_0216|34865_35386|174aa	c1|KF24_0168|35008_35529|174aa	c3|K337_1217|34601_35122|174aa	c7|KF67_1501|34950_35471|174aa	c3|KF7_1254|34509_35030|174aa	c2|Li1_0187|35005_35526|174aa	c29|LMG14418_1174|1559_2080|174aa	c8|LMG8520_0028|23855_24325|157aa	c2|LMG8526_0201|32525_33046|174aa	c2|LMG9446_1296|34932_35453|174aa	c8|LMG9449_0042|35003_35524|174aa	c3|M20_2366|132691_133212|174aa	c9|ML8_0942|34491_35012|174aa	c3|N42_2299|35088_35468|127aa	c1|AM2_0241|90707_91228|174aa	c10|UC317_2377|34488_35009|174aa	gi|KLDS_2224|2179176_2179697|174aa	gi|IL1403_2126|2035234_2035755|174aa	gi|IO1_2033|2110680_2111201|174aa	gi|CV56_2054|1998395_1998916|174aa
OG_1912	FIG00756494: hypothetical protein	8	c94|FG2_2306|75_299|75aa@	c84|HP_1694|154_378|75aa@	c79|LMG6897_2197|154_378|75aa@	c78|B40_2548|307_531|75aa@		c70|DRA4_0695|73_297|75aa@	c72|SK110_1515|73_297|75aa@					c33|N41_0566|11193_11918|242aa	c20|V4_0170|31684_32409|242aa	c18|NCDO763_1334|31219_31944|242aa	gi|MG1363_2518|2386930_2387655|242aa				c13|KF134_1107|24751_25476|242aa	c17|KF146_1945|24678_25403|242aa	c16|KF196_2074|10181_10906|242aa					c16|K337_2091|24720_25445|242aa	c20|KF67_0147|25291_25929|213aa@c20|KF67_0146|25203_25328|42aa@	c14|KF7_2318|24602_25327|242aa		c13|LMG14418_1498|26001_26732|244aa	c26|LMG8520_0877|20334_20789|152aa@c26|LMG8520_0876|20066_20188|41aa@	c14|LMG8526_2403|28303_29034|244aa	c16|LMG9446_1672|25397_26122|242aa			c19|ML8_0211|25944_26669|242aa		c21|AM2_1119|10086_10811|242aa	c20|UC317_0142|25943_26668|242aa	gi|KLDS_2492|2417561_2418286|242aa	gi|IL1403_2335|2233466_2234191|242aa	gi|IO1_2225|2297032_2297757|242aa	gi|CV56_2303|2223253_2223978|242aa
	c39|SK110_2515|64_1116|351aa@c15|SK110_0587|151_516|122aa@		Light blue indicates pseudogenes

## Sheet: 2. Overrepresentation
Table S2: Overrepresenation of functions in pseudogenes that occur in 15 or more strains.
Function	Functional Group	Number of strains where OG occurs as pseudogene	Total number in functional group	Functional group
Cell wall surface anchor family protein	surface related	42	4	hypothetical
Malate Na(+) symporter	transport	36	4	regulator
Transporter	transport	35	12	surface related
internalin, putative (LPXTG motif)	surface related	34	6	transport
HTH-type transcriptional regulator Rgg family	regulator	26
Type IV pilus biogenesis protein PilO	surface related	25
FIG00755099: hypothetical protein	hypothetical	25
Cell wall surface anchor family protein	surface related	24
Phosphoheptose isomerase (EC 5.3.1.-)		22
Predicted cell-wall-anchored protein SasA(LPXTG motif)	surface related	20
Neutral endopeptidase O (EC 3.4.24.-)		20
Glycosyl transferase	surface related	19
Co-activator of prophage gene expression IbrA	regulator	19
Late competence protein ComEC, DNA transport	transport	18
Transporter	transport	17
integral membrane protein; transport andbinding protein; multidrug resistance; there is noconnection with the lmrA gene	surface related	17
UDP-N-acetylglucosamine 2-epimerase (EC5.1.3.14)	surface related	17
Transcriptional regulator	regulator	17
2,3-butanediol dehydrogenase, R-alcoholforming, (R)- and (S)-acetoin-specific (EC 1.1.1.4)		17
PTS system, sucrose-specific IIB component (EC2.7.1.69) / PTS system, sucrose-specific IIC component(EC 2.7.1.69)	transport	16
FIG00755154: hypothetical protein	hypothetical	16
Cysteine desulfurase (EC 2.8.1.7)		16
Diadenosine tetraphosphate (Ap4A) hydrolase andother HIT family hydrolases		16
Drug resistance transporter, EmrB/QacAsubfamily	transport	15
Cell surface protein precursor	surface related	15
collagen adhesin precursor	surface related	15
Collagen adhesion protein	surface related	15
Predicted cell-wall-anchored protein SasA(LPXTG motif)	surface related	15
Malolactic regulator	regulator	15
FIG00755788: hypothetical protein	hypothetical	15
FIG00756664: hypothetical protein	hypothetical	15
Maltodextrin glucosidase (EC 3.2.1.20)		15
