# Supplementary material
Source: Frontiers journal article supplement (https://www.frontiersin.org/articles/432974)
Supplement: Data_Sheet_1.ZIP [file Supplementary Table 8.xlsx]

## Sheet: EPS cluster comparison
Table S8: Comparison of EPS biosynthesis gene clusters
OG	KF147	KF146	KF196	KF67	LMG8526	LMG9446	KF7	KF134	gene	curated annotation	automatic annotation (RAST)
OG_2277									epsX		EPSX PROTEIN			Legend:
OG_2276									epsA		Tyrosine-protein kinase transmembrane modulatorEpsC			OG present
OG_2275									epsB		Tyrosine-protein kinase EpsD (EC 2.7.10.2)			OG absent
OG_2274									epsC		Manganese-dependent protein-tyrosinephosphatase (EC 3.1.3.48)			Pseudogene
OG_2273									epsD		Undecaprenyl-phosphategalactosephosphotransferase (EC 2.7.8.6)			OG seperated
OG_2606										Glycosyl transferase family 8	Glycosyl transferase family 8 family			Mobile element
OG_8535										Hydroxymethylpyrimidine pyrophosphatase	hypothetical protein			Boundaries of a group
OG_8533											Mannose-1-phosphate guanylyltransferase (GDP)(EC 2.7.7.22)
OG_5373											N-acetylmannosaminyltransferase (EC 2.4.1.187)
OG_6504											Alpha-D-GlcNAc alpha-1,2-L-rhamnosyltransferase(EC 2.4.1.-)
OG_6506										RfbF is a putative dTDP-rhamnosyl transferase	hypothetical protein
OG_3253											Polysaccharide biosynthesis protein CpsF
OG_3379											glycosyltransferase 28-like protein
OG_3465											capsular polysaccharide biosynthesis protein
OG_2351											Glycosyltransferase
OG_6505											Oligosaccharide repeat unit polymerase Wzy
OG_5887										X	hypothetical protein
OG_5886										Glycosyl transferase family 2	Glycosyltransferase
OG_5888										Subfamily of Glycosyltransferase Family GT2	Glycosyltransferase (EC 2.4.1.-)
OG_3332									epsE		Exopolysaccharide biosynthesisglycosyltransferase EpsF (EC 2.4.1.-)
OG_3896									epsF		Polysaccharide polymerase
OG_6528										epsK	putative glycosyltransferase
OG_4683									epsG		Alpha-L-Rha alpha-1,3-L-rhamnosyltransferase(EC 2.4.1.-)
OG_3013									epsH		Glycosyltransferase
OG_3909									epsI	Glycosyltransferase family 92	hypothetical protein
OG_4417											Glycosyltransferase (EC 2.4.1.-)
OG_8534											Glycosyltransferase (EC 2.4.1.-)
OG_1698											Beta-1,3-glucosyltransferase
OG_8530										X	hypothetical protein
OG_8531										Glycosyl transferases group 1	GumI protein
OG_8532											Acetyltransferase
OG_4184											Polysaccharide biosynthesis protein CpsM(V)
OG_5250											glycosyltransferase
OG_8499										Glycosyl transferases group 1	Maltose O-acetyltransferase (EC 2.3.1.79)
OG_1999									epsJ		polysaccharide biosynthesis export protein
OG_1936
OG_2186											Galactofuranose transferase
OG_6046											O-antigen polymerase
OG_6044											2-C-methyl-D-erythritol 4-phosphatecytidylyltransferase (EC 2.7.7.60)
OG_6045											Xylitol dehydrogenase
OG_1802											UDP-galactopyranose mutase (EC 5.4.99.9)
OG_2563											UDP-glucose dehydrogenase (EC 1.1.1.22)
OG_5597											polysaccharide biosynthesis protein cpsH(V)
OG_1698											Beta-1,3-glucosyltransferase
OG_4790											COG5039: Exopolysaccharide biosynthesisprotein
OG_3080											Polysaccharide biosynthesis protein CpsM(V)
OG_2074											hypothetical, predicted membrane protein(TMS6)
OG_5307										VanZ like family (membrane protein)	Polysaccharide biosynthesis protein CpsM(V)
OG_2932											Mobile element protein
OG_2386											Mobile element protein
OG_1861											Membrane protein involved in the export ofO-antigen, teichoic acid lipoteichoic acids
OG_2196									epsk		exopolysaccharide biosynthesis protein
OG_2220									epsL		Cell envelope-associated transcriptionalattenuator LytR-CpsA-Psr, subfamily F2 (as inPMID19099556)

## Sheet: RGP (CWPS) cluster
Table S8: Comparison of RGP (CWPS) biosynthesis gene clusters
			CWPS subgroup A ?												CWPS subgroup B ?																	CWPS subgroup C ?
OG	KF196	KF134	KF146	LMG9446	KF67	ML8	UC317	CV56	UC509_9	LMG8520	E34	DRA4	LMG8526	KLDS	N42	LMG14418	ATCC19435	K231	KF24	Li1	LMG9447	KF7	IL1403	KF147	FG2	HP	LMG6897	NCDO763	MG1363	B40	N41	KW2	SK110	SK11	AM2	KF282	P7266	V4	IO_1	K337	KW10	KF201	M20	A76	gene	curated annotation	automatic annotation (RAST)
OG_783																																													rmlA		Glucose-1-phosphate thymidylyltransferase (EC2.7.7.24)	Legend:
OG_1741																																													ybjD		FIG00755577: hypothetical protein	OG present
OG_782																																													rmlC		dTDP-4-dehydrorhamnose 3,5-epimerase (EC5.1.3.13)	OG absent
OG_781																																													ybjF	x	FIG00755270: hypothetical protein	Pseudogene
OG_6687																																														serine/threonine kinase pknB-like protein	hypothetical protein	OG separated
OG_780																																													rmlB		dTDP-glucose 4,6-dehydratase (EC 4.2.1.46)	Mobile element
OG_3162																																														x	hypothetical protein	Boundaries of a group
OG_4591																																														x	hypothetical protein
OG_1764																																															Lactoylglutathione lyase and related lyases
OG_1858																																															Alpha-L-Rhaalpha-1,2-L-rhamnosyltransferase/alpha-L-Rha alpha-1,3-L-rhamnosyltransferase (EC 2.4.1.-)
OG_136																																														Rhamnan synthesis protein F (RgpF) + RfaB	glycosyltransferase
OG_779																																													rmlD		dTDP-4-dehydrorhamnose reductase (EC1.1.1.133)
OG_1905																																														x	hypothetical protein
OG_778																																													rgpA		Alpha-D-GlcNAc alpha-1,2-L-rhamnosyltransferase(EC 2.4.1.-)
OG_777																																													rgpB		Alpha-L-Rha alpha-1,3-L-rhamnosyltransferase(EC 2.4.1.-)
OG_776																																													rgpC		rhamnose-containing polysacharide translocationpermease
OG_775																																													rgpD		ABC-transporter (ATP-binding protein) -possiblyinvolved in cell wall localization and side chainformation of rhamnose-glucose polysaccharide
OG_3692																																													ycaG	Dolichyl-phosphate-mannose-protein mannosyltransferase	FIG00755925: hypothetical protein
OG_1797																																													ycaG (variant)	Dolichyl-phosphate-mannose-protein mannosyltransferase	Membrane protein
OG_136																																													rgpE	Rhamnan synthesis protein F (RgpF) + RfaB	Lipopolysaccharide biosynthesis protein
OG_3089																																													ycbA (Variant)	Dolichyl-phosphate-mannose-protein mannosyltransferase	membrane protein, related to Actinobacillusprotein (1944168)
OG_1858																																													rgpF		Alpha-L-Rhaalpha-1,2-L-rhamnosyltransferase/alpha-L-Rha alpha-1,3-L-rhamnosyltransferase (EC 2.4.1.-)
OG_2727																																													ycbA	Dolichyl-phosphate-mannose-protein mannosyltransferase	membrane protein, related to Actinobacillusprotein (1944168)
OG_2455																																														Glycosyl transferases group 1	putative glycosyltransferase - possiblyinvolved in cell wall localization and side chainformation of rhamnose-glucose polysaccharide
OG_2454																																															Dolichol-phosphate mannosyltransferase (EC2.4.1.83) in lipid-linked oligosaccharide synthesiscluster
OG_2501a																																														Glycosyl transferase family 2	Glycosyl transferase, family 2
OG_1413																																													ycbB		Glycosyltransferase involved in cell wallbiogenesis (EC 2.4.-.-); Glycosyl transferase, group 2family protein
OG_1749																																													ycbC	(DUF2304)	FIG00755241: hypothetical protein
OG_8163																																														(DUF2304)	hypothetical protein
OG_2476a																																													ycbD		UDP-glucose 4-epimerase (EC 5.1.3.2)
OG_2563																																															UDP-glucose dehydrogenase (EC 1.1.1.22)
OG_2596																																															Glycosyltransferase (EC 2.4.1.-)
OG_1698																																															Beta-1,3-glucosyltransferase
OG_5104																																														Glycosyltransferase Family GT2	hypothetical protein
OG_4346																																															Alpha-L-Rha alpha-1,3-L-rhamnosyltransferase(EC 2.4.1.-)
OG_2501b																																														Glycosyl transferase family 2	Glycosyl transferase, family 2
OG_2953																																														Glycosyl transferase family 2	Glycosyl transferase family protein
OG_1936a																																													ycbG		Lipopolysaccharide cholinephosphotransferaseLicD1 (EC 2.7.8.-)
OG_1698a																																													ycbH		Beta-1,3-glucosyltransferase
OG_1936b																																													ycbG		Lipopolysaccharide cholinephosphotransferaseLicD1 (EC 2.7.8.-)
OG_2952																																															2-C-methyl-D-erythritol 4-phosphatecytidylyltransferase (EC 2.7.7.60)
OG_2351																																														GT1 family of glycosyltransferase	Glycosyltransferase
OG_2477																																													ycbF		Glycosyltransferase (EC 2.4.1.-), group 1family protein
OG_2351																																														GT1 family of glycosyltransferase	Glycosyltransferase
OG_8162																																														Glycosyl transferase family 2	putative glycosyltransferase
OG_2259																																														(DUF3184)	Glycosyltransferase
OG_5826																																															Glycosyltransferase
OG_941																																													tagD		Glycerol-3-phosphate cytidylyltransferase (EC2.7.7.39)
OG_1698b																																													ycbH		Beta-1,3-glucosyltransferase
OG_2351																																														GT1 family of glycosyltransferase	Glycosyltransferase
OG_3582																																															dTDP-glucose 4,6-dehydratase (EC 4.2.1.46)
OG_2186																																															Galactofuranose transferase
OG_3754																																															Alpha-L-Rha alpha-1,3-L-rhamnosyltransferase(EC 2.4.1.-)
OG_8146																																															Alpha-1,2-fucosyltransferase
OG_3757																																															dTDP-rhamnosyl transferase RfbF (EC 2.-.-.-)
OG_6696																																															Alpha-L-Rha alpha-1,3-L-rhamnosyltransferase(EC 2.4.1.-)
OG_1802																																															UDP-galactopyranose mutase (EC 5.4.99.9)
OG_3013																																														GT1 family of glycosyltransferases	Glycosyltransferase
OG_1802																																															UDP-galactopyranose mutase (EC 5.4.99.9)
OG_1861																																															Membrane protein involved in the export ofO-antigen, teichoic acid lipoteichoic acids
OG_1802																																															UDP-galactopyranose mutase (EC 5.4.99.9)
OG_6084																																														x	hypothetical protein
OG_2476b																																													ycbD		UDP-glucose 4-epimerase (EC 5.1.3.2)
OG_1999																																													ycbK		polysaccharide biosynthesis export protein
OG_2477																																													ycbF		Glycosyltransferase (EC 2.4.1.-), group 1family protein
OG_1936c																																													ycbG		Lipopolysaccharide cholinephosphotransferaseLicD1 (EC 2.7.8.-)
OG_2952																																															2-C-methyl-D-erythritol 4-phosphatecytidylyltransferase (EC 2.7.7.60)	Legend:
OG_3698																																															Xylitol dehydrogenase	OG present
OG_1698c																																													ycbH		Beta-1,3-glucosyltransferase	OG absent
OG_4166																																															Glycosyl transferase, family 8	Pseudogene
OG_3025																																															glycosyl transferase, family 2	OG seperated
OG_1962																																															Beta-1,3-glucosyltransferase	Mobile element
OG_1936																																													ycbG		Lipopolysaccharide cholinephosphotransferaseLicD1 (EC 2.7.8.-)	Boundaries of a group
OG_1999																																													ycbK		polysaccharide biosynthesis export protein
OG_3465																																															capsular polysaccharide biosynthesis protein
OG_2697																																															Glycosyltransferase (EC 2.4.1.-)
OG_2968																																													ycbJ		N-acetylmuramoyl-L-alanine amidase (EC3.5.1.28)
OG_941																																													tagD		Glycerol-3-phosphate cytidylyltransferase (EC2.7.7.39)
OG_5366																																															N-acetylmuramoyl-L-alanine amidase (EC3.5.1.28)
OG_7775																																															Mobile element protein
OG_2867																																															Mobile element protein
OG_1822																																														DUF3184	hypothetical protein
OG_1805																																														Dolichyl-phosphate-mannose-protein mannosyltransferase	Membrane protein
OG_1802																																															UDP-galactopyranose mutase (EC 5.4.99.9)
OG_6972																																															Phosphoglycerol transferase
OG_4500																																															hypothetical protein
OG_115																																													yccB		N-acetylmuramoyl-L-alanine amidase (EC3.5.1.28)

## Sheet: TA cluster
Table S8: Comparison of TA biosynthesis gene clusters
OG	KF134	KF146	KF196	B40	P7266	KF24	KF67	LMG9446	N41	V4	NCDO763	MG1363	KW2	ATCC19435	LMG8526	KW10	KF147	M20	KF7	KF282	UC509_9	SK110	SK11	AM2	FG2	HP	LMG6897	IO_1	E34	KF201	K337	KLDS	LMG14418	K231	DRA 4	Li1	ML8	N42	UC317	IL1403	CV56	A76	LMG8520	LMG9447	gene	curated annotation	automatic annotation (RAST)
OG_1676																																															FIG00755447: hypothetical protein	Legend:
OG_52																																															drug resistance transporter, EmrB/QacA family	OG present
OG_1675																																															FIG00755356: hypothetical protein	OG absent
OG_529																																															FIG00755706: hypothetical protein	Pseudogene
OG_1																																															Mobile element protein	OG seperated
OG_2853																																															Predicted transcriptional regulators	Mobile element
OG_1775																																													tagL		exopolysaccharide biosynthesis protein	Boundaries of a group
OG_2500																																															Potassium voltage-gated channel subfamily KQT;possible potassium channel, VIC family
OG_2403																																														Glycosyl transferase family 2	Glycosyltransferase
OG_4015																																														x	hypothetical protein
OG_1942																																													tagH		Teichoic acid export ATP-binding protein TagH(EC 3.6.3.40)
OG_1925																																													tagG		Teichoic acid translocation permease proteinTagG
OG_2606																																															Glycosyl transferase family 8 family
OG_2351																																														GT1 family of glycosyltransferase	Glycosyltransferase
OG_6747																																															Glycerophosphoryl diester phosphodiesterase (EC3.1.4.46)
OG_2403																																														Glycosyl transferase family 2	Glycosyltransferase
OG_5289																																														Polysaccharide pyruvyl transferase	hypothetical protein
OG_5290																																														Polysaccharide pyruvyl transferase	hypothetical protein
OG_5291																																														Polysaccharide pyruvyl transferase	hypothetical protein
OG_7194																																														x	hypothetical protein
OG_2887																																														Glycosyl transferase family 2	Glycosyltransferase
OG_2836																																														x	hypothetical protein
OG_1770																																														x	FIG00755304: hypothetical protein
OG_5008																																														Glycosyltransferase Family GT2	GALACTOFURANOSYL TRANSFERASE
OG_7267																																														polysaccharide pyruvyl transferase	hypothetical protein
OG_5904																																														x	hypothetical protein
OG_5009																																															2-succinyl-5-enolpyruvyl-6-hydroxy-3-cyclohexene-1-carboxylic-acid synthase (EC 2.2.1.9)
OG_4930																																															NAD-dependent epimerase/dehydratase
OG_5010																																															O-linked GlcNAc transferase
OG_5011																																															hypothetical protein
OG_2957																																													ggaB		Minor teichoic acid biosynthesis protein GgaB
OG_3421																																														Capsular polysaccharide biosynthesis protein	hypothetical protein
OG_3755																																															Glycosyltransferase
OG_2563																																															UDP-glucose dehydrogenase (EC 1.1.1.22)
OG_3227																																														Maltose O-acyltransferase (MAT)-like	transferase, hexapeptide repeat family
OG_4593																																														TPR repeat [Signal transduction mechanisms]	hypothetical protein
OG_4478																																														putative acetyltransferase	hypothetical protein
OG_3806																																														putative secreted protein	FIG00755694: hypothetical protein
OG_1801																																															Mobile element protein
OG_1711																																															Mobile element protein
OG_2598																																														Putative major teichoic acid biosynthesisprotein C	Putative major teichoic acid biosynthesisprotein C
OG_1802																																													glf		UDP-galactopyranose mutase (EC 5.4.99.9)
OG_3036																																														SGNH_hydrolase subfamily	putative secreted protein
OG_3037																																															Arabinan endo-1,5-alpha-L-arabinosidase (EC3.2.1.99)
OG_2598																																														Putative major teichoic acid biosynthesisprotein C	Putative major teichoic acid biosynthesisprotein C
OG_2708																																														x	FIG00755731: hypothetical protein
OG_5749																																															Mobile element protein
OG_3447																																															Mobile element protein
OG_15																																															Mobile element protein
OG_2833																																															Putative CDP-glycosylpolyolphosphate:glycosylpolyolglycosylpolyolphosphotransferase
OG_5252																																														x	hypothetical protein
OG_2523																																														x	hypothetical protein
OG_2458																																														CDP-glycerol glycerophosphotransferase (polymerase)	Teichoic acid biosynthesis protein
OG_2639																																														x	FIG00757086: hypothetical protein
OG_4942																																														GT1 family of glycosyltransferases	Teichoic acid biosynthesis protein
OG_4941																																														x	hypothetical protein
OG_941																																															Glycerol-3-phosphate cytidylyltransferase (EC2.7.7.39)
OG_4229																																														glycosyl transferase GT2 family	hypothetical protein
OG_1941																																														x	FIG00755090: hypothetical protein
OG_15																																															Mobile element protein
OG_3555																																															Mobile element protein
OG_4845																																															Mobile element protein
OG_3																																															Mobile element protein
OG_2709																																															Mobile element protein
OG_1																																															Mobile element protein
OG_1744																																													tagF		CDP-glycerol:poly(glycerophosphate)glycerophosphotransferase (EC 2.7.8.12)
OG_1760																																													tagB		CDP-ribitol:poly(ribitol phosphate) ribitolphosphotransferase
OG_2388																																														DUF3173	hypothetical protein
OG_3065																																														x	hypothetical protein
OG_3510																																														FtsK/SpoIIIE family	hypothetical protein
OG_3666																																														x	hypothetical protein
OG_3658																																														x	hypothetical protein
OG_3657																																														Helix-turn-helix XRE-family	hypothetical protein
OG_3660																																														x	hypothetical protein
OG_3655																																														x	hypothetical protein
OG_3659																																														x	hypothetical protein
OG_3656																																														x	hypothetical protein
OG_3017																																														CDP-glycerol glycerophosphotransferase, TagB/SpsB family	Putative polyribitolphosphotransferase
OG_160																																													yjfE		Cell envelope-associated transcriptionalattenuator LytR-CpsA-Psr, subfamily F4 (as inPMID19099556)
OG_940																																															Phosphopentomutase (EC 5.4.2.7)
OG_1481																																															FIG00755340: hypothetical protein
OG_7113																																															hypothetical protein
OG_939																																															Purine nucleoside phosphorylase (EC 2.4.2.1)
