# Supplementary material
Source: Frontiers journal article supplement (https://www.frontiersin.org/articles/432974)
Supplement: Data_Sheet_1.ZIP [file Supplementary Table 11.xlsx]

## Sheet: Sex factor sorted KLDS
Table S11: Sex factor gene cluster
OG	cluster	B40	FG2	HP	LMG6897	UC509_9	AM2	SK110	SK11	A76	KW10	KW2	N41	V4	NCDO763	MG1363	P7266	ATCC19435	DRA4	E34	KF134	KF146	KF196	KF201	KF282	K231	KF24	K337	KF67	KF7	Li1	LMG14418	LMG8520	LMG8526	LMG9446	LMG9447	M20	ML8	N42	UC317	KLDS	IL1403	IO_1	CV56	KF147	gene	improved annotation	function
OG_4039	SexF																	c1|ATCC19435_0278|172870_173034|55aa																					c2|N42_1520|135043_135207|55aa		gi|KLDS_1234|1190058_1190225|56aa							hypothetical protein
OG_3192	SexF																	c1|ATCC19435_0277|172399_172845|149aa											c12|KF67_2505|39440_39895|152aa				c69|LMG8520_0741|2246_2713|156aa			c10|LMG9447_2582|19745_20212|156aa	c32|M20_1290|24679_25140|154aa c30|M20_2025|464_916|151aa		c2|N42_1519|134572_135036|155aa		gi|KLDS_1235|1190248_1190694|149aa							hypothetical protein
OG_3192	SexF																	c1|ATCC19435_0277|172399_172845|149aa											c12|KF67_2505|39440_39895|152aa								c32|M20_1290|24679_25140|154aa c30|M20_2025|464_916|151aa		c2|N42_1519|134572_135036|155aa		gi|KLDS_1235|1190248_1190694|149aa							hypothetical protein
OG_4411	SexF																	c1|ATCC19435_0276|172022_172396|125aa																					c2|N42_1518|134195_134569|125aa		gi|KLDS_1236|1190697_1191083|129aa							hypothetical protein
OG_5706	SexF																																								gi|KLDS_1237|1191255_1191506|84aa							hypothetical protein
OG_5707	SexF																																								gi|KLDS_1238|1191496_1192719|408aa							3-oxoacyl-[acyl-carrier-protein] synthase,KASII (EC 2.3.1.179)
OG_1711	SexF																																								gi|KLDS_1239|1192824_1194047|408aa							Mobile element protein
OG_1801	SexF																																								gi|KLDS_1240|1194059_1194817|253aa							Mobile element protein
OG_5739	SexF																																								gi|KLDS_1241|1194893_1195585|231aa							hypothetical protein
OG_5741	SexF																																								gi|KLDS_1242|1195540_1196274|245aa							hypothetical protein
OG_5740	SexF																																								gi|KLDS_1243|1196267_1197592|442aa							FIG00753725: hypothetical protein
OG_5743	SexF																																								gi|KLDS_1244|1197651_1198082|144aa							protein of unknown function UPF0074
OG_5742	SexF																																								gi|KLDS_1245|1198063_1198986|308aa							2-dehydropantoate 2-reductase (EC 1.1.1.169)
OG_5745	SexF																																								gi|KLDS_1246|1199089_1199352|88aa							hypothetical protein
OG_5744	SexF																																								gi|KLDS_1247|1199349_1200005|219aa							Phosphoglycerate mutase family
OG_5746	SexF																																								gi|KLDS_1248|1200271_1200765|165aa							hypothetical protein
OG_4038	SexF																	c1|ATCC19435_0274|165188_171739|2184aa																					c2|N42_1516|127361_133912|2184aa		gi|KLDS_1249|1200762_1205135|1458aa*gi|KLDS_1250|1205323_1206876|518aa						cell-surface protein, LPxTG anchor	Predicted cell-wall-anchored protein SasA(LPXTG motif)
OG_3643	SexF														c14|NCDO763_2516|35981_36379|133aa	gi|MG1363_1450|1368421_1368819|133aa																		c12|LMG8526_2347|46583_46981|133aa		c10|LMG9447_2586|26518_26931|138aa					gi|KLDS_1251|1206887_1207303|139aa							hypothetical protein
OG_4410	SexF																	c1|ATCC19435_0272|164772_164999|76aa																					c2|N42_1514|126945_127172|76aa		gi|KLDS_1252|1207378_1207605|76aa							hypothetical protein
OG_3458	SexF														c14|NCDO763_2518|36670_37458|263aa	gi|MG1363_1448|1367342_1368130|263aa		c1|ATCC19435_0271|163980_164762|261aa																c12|LMG8526_2345|45504_46292|263aa					c2|N42_1513|126153_126935|261aa		gi|KLDS_1253|1207615_1208397|261aa							Tn5252, Orf23
OG_3457	SexF														c14|NCDO763_2519|37460_37813|118aa	gi|MG1363_1447|1366987_1367340|118aa		c1|ATCC19435_0270|163600_163980|127aa																c12|LMG8526_2344|45149_45502|118aa					c2|N42_1512|125773_126153|127aa		gi|KLDS_1254|1208397_1208777|127aa							hypothetical protein
OG_2389	SexF														c14|NCDO763_2520|37767_40157|797aa	gi|MG1363_1446|1364643_1367033|797aa		c1|ATCC19435_0269|161301_163577|759aa		c11|E34_1030|15271_17124|618aa														c12|LMG8526_2343|42805_45051|749aa		c10|LMG9447_2593|31789_34065|759aa			c2|N42_1511|123474_125750|759aa		gi|KLDS_1255|1208701_1211076|792aa		gi|IO1_1207|1250721_1253138|806aa					FIG01115039: hypothetical protein
OG_3218	SexF														c14|NCDO763_2521|40161_42773|871aa	gi|MG1363_1445|1362027_1364639|871aa		c1|ATCC19435_0268|158697_161288|864aa		c11|E34_1031|17111_19762|884aa														c12|LMG8526_2342|40189_42801|871aa					c2|N42_1510|120870_123461|864aa		gi|KLDS_1256|1211087_1213678|864aa		gi|IO1_1206|1248125_1250674|850aa					Immunogenic secreted protein
OG_3217	SexF														c14|NCDO763_2523|43126_43818|231aa	gi|MG1363_1443|1360982_1361674|231aa		c1|ATCC19435_0267|157990_158679|230aa		c11|E34_1032|19732_20334|201aa														c12|LMG8526_2341|39475_40167|231aa					c2|N42_1509|120163_120852|230aa		gi|KLDS_1257|1213696_1214385|230aa		gi|IO1_1205|1247510_1248112|201aa					hypothetical protein
OG_4409	SexF																	c1|ATCC19435_0266|157691_157990|100aa																					c2|N42_1508|119864_120163|100aa		gi|KLDS_1258|1214385_1214681|99aa							hypothetical protein
OG_4408	SexF																	c1|ATCC19435_0265|156676_157704|343aa																					c2|N42_1507|118849_119877|343aa		gi|KLDS_1259|1214668_1215702|345aa							MJ0042 family finger-like protein
OG_4407	SexF																	c1|ATCC19435_0264|156026_156607|194aa																					c2|N42_1506|118199_118780|194aa		gi|KLDS_1260|1215876_1216361|162aa						Abortive infection protein AbiGI	Abortive infection protein AbiGI
OG_4406	SexF																	c1|ATCC19435_0263|155035_156033|333aa																					c2|N42_1505|117208_118206|333aa		gi|KLDS_1261|1216354_1217337|328aa						Abortive infection protein AbiGII	Abortive infection protein AbiGII
OG_4405	SexF																	c1|ATCC19435_0262|154227_155045|273aa																					c2|N42_1504|116400_117218|273aa		gi|KLDS_1262|1217392_1218204|271aa							cell filamentation protein Fic-related protein
OG_4404	SexF																	c1|ATCC19435_0261|152455_154173|573aa																					c2|N42_1503|114628_116346|573aa		gi|KLDS_1263|1218249_1219964|572aa							predicted ATP-dependent endonuclease, OLDfamily
OG_4403	SexF																	c1|ATCC19435_0260|150959_152464|502aa																					c2|N42_1502|113132_114637|502aa		gi|KLDS_1264|1219955_1221460|502aa							ATP-dependent DNA helicase UvrD/PcrA
OG_3456	SexF														c14|NCDO763_2526|45590_46093|168aa	gi|MG1363_1440|1358707_1359210|168aa		c1|ATCC19435_0259|150241_150762|174aa																c12|LMG8526_2335|36347_36850|168aa					c2|N42_1501|112414_112935|174aa		gi|KLDS_1265|1221656_1222177|174aa							hypothetical protein
OG_2164	SexF														c14|NCDO763_2527|46090_47928|613aa	gi|MG1363_1439|1356872_1358710|613aa		c1|ATCC19435_0258|148427_150244|606aa		c11|E34_1026|11226_13082|619aa														c12|LMG8526_2334|34512_36350|613aa		c16|LMG9447_2063|5579_7414|612aa			c2|N42_1500|110600_112417|606aa		gi|KLDS_1266|1222174_1223991|606aa							FIG00628985: hypothetical protein
OG_4037	SexF																	c1|ATCC19435_0257|147455_148276|274aa																					c2|N42_1499|109628_110449|274aa		gi|KLDS_1267|1223993_1224967|325aa			gi|CV56_2243|2165165_2165977|271aa				Putative methyltransferase (EC 2.1.1.72)
OG_2771	SexF														c46|NCDO763_2457|11068_12138|357aa	gi|MG1363_1436|1354233_1355417|395aa		c1|ATCC19435_0256|145285_147462|726aa		c11|E34_1036|23287_24402|372aa							c16|KF24_1990|3777_4847|357aa						c66|LMG8520_0847|413_1009|199aa*	c12|LMG8526_2332|32177_33370|398aa		c10|LMG9447_2602|50671_53292|874aa	c34|M20_1213|6039_7223|395aa		c2|N42_1498|107458_109635|726aa		gi|KLDS_1268|1224960_1227137|726aa		gi|IO1_1201|1243442_1244557|372aa					LtrC-like protein
OG_4402	SexF																	c1|ATCC19435_0254|142511_144754|748aa																					c2|N42_1496|104684_106927|748aa		gi|KLDS_1269|1227467_1230196|910aa							hypothetical protein
OG_5724	SexF																																								gi|KLDS_1270|1230331_1230939|203aa							hypothetical protein
OG_5725	SexF																																								gi|KLDS_1271|1230939_1231181|81aa							hypothetical protein
OG_5726	SexF																																								gi|KLDS_1272|1231203_1231940|246aa							FIG00912340: hypothetical protein
OG_2944	SexF																	c1|ATCC19435_0251|131005_140511|3169aa						c19|KF201_0741|17706_20552|949aa	c35|KF282_0944|4255_4383|43aa	c20|K231_0142|16410_17948|513aa		c6|K337_1922|122479_127320|1614aa	c12|KF67_2477|6110_14278|2723aa							c10|LMG9447_2599|39013_46968|2652aa	c93|M20_0418|8_262|85aa		c2|N42_1493|93178_102684|3169aa		gi|KLDS_1273|1232113_1241631|3173aa		gi|IO1_1195|1233472_1235604|711aa		gi|KF147_2625|26029_26157|43aa			DNA methylase
OG_4335	SexF																	c1|ATCC19435_0250|129964_130983|340aa																					c2|N42_1492|92137_93156|340aa		gi|KLDS_1274|1241653_1242672|340aa							LtrC-like protein
OG_4401	SexF																	c1|ATCC19435_0249|129705_129974|90aa																					c2|N42_1491|91878_92147|90aa		gi|KLDS_1275|1242662_1242931|90aa							hypothetical protein
OG_3191	SexF														c46|NCDO763_2451|5205_5561|119aa	gi|MG1363_1430|1348370_1348726|119aa		c1|ATCC19435_0248|129096_129461|122aa															c66|LMG8520_0853|5952_6308|119aa	c12|LMG8526_2328|27527_27886|120aa			c34|M20_1219|11637_11993|119aa		c2|N42_1490|91269_91634|122aa		gi|KLDS_1276|1243182_1243547|122aa							hypothetical protein
OG_2115	SexF		c138|FG2_1120|3884_4291|136aa	c106|HP_2428|5785_6192|136aa	c119|LMG6897_1468|3884_4291|136aa	gi|UC5099_2482|48081_48671|197aa	c177|AM2_0595|62_469|136aa	c160|SK110_1977|62_469|136aa	gi|SK11_2690|25064_25471|136aa	gi|A76_2702|4534_4941|136aa					c46|NCDO763_2450|4690_5205|172aa	gi|MG1363_1429|1347855_1348370|172aa															c39|Li1_2448|2694_3206|171aa		c66|LMG8520_0854|6308_6823|172aa		c49|LMG9446_0109|2694_3206|171aa	c10|LMG9447_2607|55412_55804|131aa				c61|UC317_1102|2556_2963|136aa	gi|KLDS_1277|1243551_1244081|177aa					mobD	relaxase Mob DEI	relaxase Mob DEI
OG_2299	SexF	c138|B40_1125|252_2051|600aa	c138|FG2_1119|1547_3346|600aa	c106|HP_2427|3448_5247|600aa	c119|LMG6897_1467|1547_3346|600aa		c132|AM2_2160|122_1921|600aa	c129|SK110_0311|576_2375|600aa	gi|SK11_2689|22727_24526|600aa	gi|A76_2701|2197_3996|600aa					c46|NCDO763_2449|2353_4152|600aa	gi|MG1363_1428|1345518_1347317|600aa								c34|KF201_2103|779_2650|624aa									c86|LMG8520_1948|121_1920|600aa			c10|LMG9447_2608|56342_58141|600aa				c61|UC317_1101|219_2018|600aa	gi|KLDS_1278|1244619_1246418|600aa					ltrA	group II intron reverse transcriptase/maturase/Retron-type RNA-directed DNA polymerase (EC2.7.7.49)	Retron-type RNA-directed DNA polymerase (EC2.7.7.49)
OG_103	SexF		c138|FG2_1118|282_1400|373aa	c106|HP_2426|2183_3301|373aa	c119|LMG6897_1466|282_1400|373aa	gi|UC5099_2483|48678_49598|307aa		c124|SK110_0647|1367_2071|235aa	gi|SK11_2687|21461_22165|235aa	gi|A76_2700|932_2071|380aa					c46|NCDO763_2448|1022_2137|372aa	gi|MG1363_1427|1344187_1345302|372aa		c1|ATCC19435_0247|127416_129092|559aa		c11|E34_1041|28274_29794|507aa							c35|KF24_1811|8506_10023|506aa		c19|KF67_0706|29060_30577|506aa					c12|LMG8526_2327|25824_27527|568aa	c20|LMG9446_0132|13314_14831|506aa	c16|LMG9447_2076|18111_19628|506aa	c34|M20_1220|11993_13696|568aa		c2|N42_1489|89589_91265|559aa		gi|KLDS_1279|1246565_1247692|376aa		gi|IO1_1197|1238052_1239572|507aa	gi|CV56_0004|3203_4720|506aa		mobD	MobD relaxase/mobilization nuclease domain containing protein	Relaxase
OG_2496	SexF																	c1|ATCC19435_0246|126507_127403|299aa			c4|KF134_1021|170769_171674|302aa	c16|KF146_2227|22650_23537|296aa													c0|LMG9446_0838|11278_12183|302aa				c2|N42_1488|88680_89576|299aa		gi|KLDS_1280|1247729_1248139|137aa*							Positive transcriptional regulator, MutRfamily
OG_1711	SexF	c159|B40_1581|859_2043|395aa	c190|FG2_1721|120_1304|395aa	c177|HP_1641|120_1304|395aa	c166|LMG6897_2130|120_1304|395aa	gi|UC5099_0023|30386_31696|437aa gi|UC5099_0111|113940_115250|437aa gi|UC5099_1292|1215396_1216619|408aa gi|UC5099_1381|1301147_1302370|408aa gi|UC5099_1556|1468956_1470179|408aa gi|UC5099_1676|1579704_1580561|286aa gi|UC5099_1957|1852407_1853630|408aa gi|UC5099_2447|18280_19503|408aa				gi|A76_0690|649697_650881|395aa gi|A76_2134|1980604_1981788|395aa gi|A76_2740|35192_36376|395aa gi|A76_1140|1060296_1060718|141aa			c84|N41_0726|219_1403|395aa		c86|NCDO763_1901|120_1304|395aa				c86|DRA4_1845|859_2043|395aa																	c43|LMG9447_1630|2323_3507|395aa				c94|UC317_1916|120_1304|395aa	gi|KLDS_1281|1248370_1249593|408aa							Mobile element protein
OG_1801	SexF	c159|B40_1580|89_847|253aa	c190|FG2_1722|1316_2074|253aa	c177|HP_1642|1316_2074|253aa	c166|LMG6897_2131|1316_2074|253aa	gi|UC5099_1557|1470191_1470949|253aa gi|UC5099_1956|1851637_1852395|253aa				gi|A76_0691|650893_651651|253aa gi|A76_1139|1059526_1060284|253aa gi|A76_2135|1981800_1982558|253aa gi|A76_2741|36388_37146|253aa			c84|N41_0727|1415_2173|253aa		c86|NCDO763_1902|1316_2074|253aa				c86|DRA4_1844|89_847|253aa																	c43|LMG9447_1631|3519_4277|253aa				c94|UC317_1917|1316_2074|253aa	gi|KLDS_1282|1249605_1250363|253aa							Mobile element protein
OG_4168	SexF																				c6|KF134_2187|90088_90357|90aa									c6|KF7_1829|34727_35071|115aa						c3|LMG9447_2366|36678_36911|78aa					gi|KLDS_1283|1250435_1250812|126aa							hypothetical protein
OG_5257	SexF																																								gi|KLDS_1284|1251242_1252036|265aa							Methyltransferase (EC 2.1.1.-)
OG_5258	SexF																																								gi|KLDS_1285|1252088_1252939|284aa							hypothetical protein
OG_5259	SexF																																								gi|KLDS_1286|1252965_1253963|333aa							hypothetical protein
OG_5260	SexF																																								gi|KLDS_1287|1253963_1255021|353aa							putative oxidoreductase
OG_5261	SexF																																								gi|KLDS_1288|1255018_1256223|402aa							Pleiotropic regulatory protein
OG_5695	SexF																																								gi|KLDS_1289|1256227_1256994|256aa							hypothetical protein
OG_5262	SexF																																								gi|KLDS_1290|1257023_1257394|124aa							hypothetical protein
OG_5263	SexF																																								gi|KLDS_1291|1257378_1258232|285aa							hypothetical protein
OG_5264	SexF																																								gi|KLDS_1292|1258313_1259107|265aa							hypothetical protein
OG_3526	SexF																				c0|KF134_1789|265868_272308|2147aa	c1|KF146_0682|266840_273280|2147aa	c7|KF196_0728|48763_55203|2147aa								c1|Li1_0685|307209_313649|2147aa										gi|KLDS_1293|1259125_1262106|994aa				gi|KF147_1264|1257262_1263702|2147aa	npkS	Hybrid nonribosomal peptide synthetase/polyketide synthase	Malonyl CoA-acyl carrier protein transacylase(EC 2.3.1.39)
OG_2563	SexF																	c1|ATCC19435_0231|110671_111837|389aa	c17|DRA4_0414|39707_40954|416aa									c4|K337_0777|11104_12270|389aa		c5|KF7_1928|12316_13482|389aa					c0|LMG9446_1041|196554_197720|389aa				c2|N42_1473|72844_74010|389aa		gi|KLDS_1294|1262137_1263303|389aa							UDP-glucose dehydrogenase (EC 1.1.1.22)
OG_4565	SexF									gi|A76_1572|1461792_1463006|405aa																															gi|KLDS_1295|1263393_1264607|405aa							ABC transporter membrane-spanning permease -macrolide efflux
OG_3784	SexF									gi|A76_1571|1460677_1461453|259aa																															gi|KLDS_1296|1264946_1265722|259aa							Transcriptional regulator, XRE family
OG_4585	SexF									gi|A76_1570|1460375_1460506|44aa																															gi|KLDS_1297|1265893_1266024|44aa							hypothetical protein
OG_4400	SexF									gi|A76_1569|1459218_1460294|359aa																															gi|KLDS_1298|1266105_1267181|359aa							ImpB/MucB/SamB family protein
OG_2294	SexF		c1|FG2_0112|37230_37586|119aa							gi|A76_1568|1458817_1459221|135aa	c3|KW10_1182|25313_25705|131aa		c48|N41_2065|1830_2159|110aa				c12|P7266_1541|79716_80114|133aa	c1|ATCC19435_0228|107982_108125|48aa		c11|E34_1057|46998_47390|131aa				c24|KF201_2249|1830_2222|131aa		c20|K231_0136|8255_8647|131aa	c64|KF24_2091|1743_2135|131aa		c12|KF67_2519|49944_50270|109aa		c24|Li1_1248|5174_5566|131aa			c12|LMG8526_2364|62192_62518|109aa	c19|LMG9446_0455|9202_9594|131aa	c48|LMG9447_2169|4269_4598|110aa c82|LMG9447_0555|630_1022|131aa	c46|M20_2592|4747_5073|109aa		c2|N42_1470|70155_70298|48aa		gi|KLDS_1299|1267178_1267582|135aa		gi|IO1_1179|1214644_1215036|131aa	gi|CV56_2489|19639_20034|132aa				hypothetical protein
OG_2240	SexF									gi|A76_1567|1457787_1458827|347aa	c3|KW10_1181|24300_25292|331aa							c1|ATCC19435_0226|106757_107707|317aa		c11|E34_1058|47405_48430|342aa				c24|KF201_2250|2237_3262|342aa															c2|N42_1468|68930_69880|317aa		gi|KLDS_1300|1267572_1268612|347aa				gi|KF147_1330|1335753_1336355|201aa			RecA protein
OG_3325	SexF									gi|A76_1566|1455957_1457741|595aa								c1|ATCC19435_0225|104837_106621|595aa														c1|LMG14418_0155|36803_37249|149aa							c2|N42_1467|67010_68794|595aa		gi|KLDS_1301|1268658_1270442|595aa							hypothetical protein
OG_3783	SexF																																								gi|KLDS_1302|1270827_1271072|82aa							hypothetical protein
OG_4357	SexF																																								gi|KLDS_1303|1271062_1271313|84aa							Excisionase
OG_4359	SexF																																								gi|KLDS_1304|1271424_1272677|418aa							Phage integrase

## Sheet: sex factor sorted N42
Table S11: Sex factor gene cluster
OG	cluster	B40	FG2	HP	LMG6897	UC509_9	AM2	SK110	SK11	A76	KW10	KW2	N41	V4	NCDO763	MG1363	P7266	NCDO895	ATCC19435	DRA4	E34	KF134	KF146	KF196	KF201	KF282	K231	KF24	K337	KF67	KF7	Li1	LMG14418	LMG8520	LMG8526	LMG9446	LMG9447	M20	ML8	N42	UC317	KLDS	IL1403	IO_1	CV56	KF147	gene	improved annotation	function
OG_2651	SexF																		c1|ATCC19435_0222|102531_103292|254aa																					c2|N42_1464|64704_65966|421aa								DNA integration/recombination/inversion protein	Phage integrase
OG_2092	SexF	c33|B40_0300|13712_13843|44aa					c30|AM2_1934|22214_22462|83aa	c58|SK110_2081|9624_9755|44aa		gi|A76_0652|627228_627488|87aa		gi|KW2_1826|1914475_1914735|87aa	c20|N41_0128|8173_8433|87aa	c32|V4_2421|10615_10875|87aa					c1|ATCC19435_0223|103871_104119|83aa	c67|DRA4_1212|2240_2500|87aa*	c0|E34_1544|140977_141237|87aa c16|E34_2155|8412_8540|43aa						c4|K231_0843|23912_24172|87aa	c58|KF24_2169|3860_4108|83aa c93|KF24_0426|1151_1411|87aa			c2|KF7_0334|191094_191354|87aa		c33|LMG14418_0448|1005_1265|87aa		c17|LMG8526_1780|17608_17853|82aa	c17|LMG9446_0495|25639_25899|87aa			c3|ML8_1209|373_633|87aa	c2|N42_1465|66044_66292|83aa	c5|UC317_1825|96569_96829|87aa							Excisionase	putative excisionase
OG_3783	SexF									gi|A76_1565|1455327_1455572|82aa									c1|ATCC19435_0224|104159_104452|98aa																					c2|N42_1466|66332_66625|98aa									hypothetical protein
OG_3325	SexF									gi|A76_1566|1455957_1457741|595aa									c1|ATCC19435_0225|104837_106621|595aa														c1|LMG14418_0155|36803_37249|149aa							c2|N42_1467|67010_68794|595aa		gi|KLDS_1301|1268658_1270442|595aa							hypothetical protein
OG_2240	SexF									gi|A76_1567|1457787_1458827|347aa	c3|KW10_1181|24300_25292|331aa								c1|ATCC19435_0226|106757_107707|317aa		c11|E34_1058|47405_48430|342aa				c24|KF201_2250|2237_3262|342aa															c2|N42_1468|68930_69880|317aa		gi|KLDS_1300|1267572_1268612|347aa				gi|KF147_1330|1335753_1336355|201aa			RecA protein
OG_4979	SexF																		c1|ATCC19435_0227|107724_107951|76aa																					c2|N42_1469|69897_70124|76aa									hypothetical protein
OG_2294	SexF		c1|FG2_0112|37230_37586|119aa							gi|A76_1568|1458817_1459221|135aa	c3|KW10_1182|25313_25705|131aa		c48|N41_2065|1830_2159|110aa				c12|P7266_1541|79716_80114|133aa		c1|ATCC19435_0228|107982_108125|48aa		c11|E34_1057|46998_47390|131aa				c24|KF201_2249|1830_2222|131aa		c20|K231_0136|8255_8647|131aa	c64|KF24_2091|1743_2135|131aa		c12|KF67_2519|49944_50270|109aa		c24|Li1_1248|5174_5566|131aa			c12|LMG8526_2364|62192_62518|109aa	c19|LMG9446_0455|9202_9594|131aa	c48|LMG9447_2169|4269_4598|110aa c82|LMG9447_0555|630_1022|131aa	c46|M20_2592|4747_5073|109aa		c2|N42_1470|70155_70298|48aa		gi|KLDS_1299|1267178_1267582|135aa		gi|IO1_1179|1214644_1215036|131aa	gi|CV56_2489|19639_20034|132aa				hypothetical protein
OG_22	SexF		c1|FG2_0111|35777_37240|488aa c125|FG2_1568|1039_2505|489aa	c112|HP_2005|1039_2505|489aa	c107|LMG6897_1476|1039_2505|489aa	gi|UC5099_2428|5008_6474|489aa gi|UC5099_2453|22053_23519|489aa	c92|AM2_0864|1108_2106|333aa c92|AM2_0865|2103_2573|157aa	c127|SK110_0753|1108_2106|333aa	gi|SK11_2728|62032_63030|333aa gi|SK11_2729|63027_63497|157aa	gi|A76_2754|44623_45957|445aa* gi|A76_2755|45926_46240|105aa*	c3|KW10_1183|25702_27153|484aa		c52|N41_0724|5230_6147|306aa c48|N41_2066|2222_3673|484aa	c34|V4_2265|1564_2778|405aa c34|V4_2266|2736_3029|98aa	c58|NCDO763_2023|5231_5959|243aa		c6|P7266_0749|10825_12291|489aa c12|P7266_1542|80111_81577|489aa	c9|NCDO895_1558|37001_38467|489aa	c1|ATCC19435_0229|108177_109571|465aa		c11|E34_1056|45535_47001|489aa				c24|KF201_2248|391_1833|481aa	c17|KF282_0975|30098_31642|515aa	c20|K231_0137|8644_10086|481aa c19|K231_0673|9947_11413|489aa	c64|KF24_2090|295_1746|484aa		c19|KF67_0713|34580_36046|489aa c12|KF67_2520|50333_51799|489aa	c19|KF7_0613|4913_6379|489aa	c24|Li1_1247|3711_5177|489aa		c100|LMG8520_1944|215_685|157aa c41|LMG8520_0380|18404_19132|243aa	c12|LMG8526_2365|62581_64047|489aa	c20|LMG9446_0126|7972_9438|489aa c19|LMG9446_0456|9591_11057|489aa	c82|LMG9447_0556|1019_2485|489aa c16|LMG9447_2081|23314_24858|515aa c48|LMG9447_2168|2740_4206|489aa	c46|M20_2591|3218_4684|489aa	c6|ML8_2159|45032_46498|489aa	c2|N42_1471|70350_71744|465aa c54|N42_2140|1222_2544|441aa c46|N42_2676|5642_6706|355aa				gi|IO1_1180|1215033_1216484|484aa	gi|CV56_2490|20031_21497|489aa	gi|KF147_2599|4551_6017|489aa			ImpB/MucB/SamB family protein
OG_3784	SexF																		c1|ATCC19435_0230|109584_110360|259aa																					c2|N42_1472|71757_72533|259aa									Transcriptional regulator, XRE family
OG_2563	SexF																		c1|ATCC19435_0231|110671_111837|389aa	c17|DRA4_0414|39707_40954|416aa									c4|K337_0777|11104_12270|389aa		c5|KF7_1928|12316_13482|389aa					c0|LMG9446_1041|196554_197720|389aa				c2|N42_1473|72844_74010|389aa		gi|KLDS_1294|1262137_1263303|389aa							UDP-glucose dehydrogenase (EC 1.1.1.22)
OG_4980	SexF																		c1|ATCC19435_0232|111837_112616|260aa																					c2|N42_1474|74010_74789|260aa									DNA methylase N-4/N-6 domain protein
OG_4981	SexF																		c1|ATCC19435_0233|112687_114276|530aa																					c2|N42_1475|74860_76449|530aa									COG0488: ATPase components of ABC transporterswith duplicated ATPase domains
OG_4982	SexF																		c1|ATCC19435_0234|114492_115169|226aa																					c2|N42_1476|76665_77342|226aa									4'-phosphopantetheinyl transferase (EC2.7.8.-)
OG_4983	SexF																		c1|ATCC19435_0235|115185_115994|270aa																					c2|N42_1477|77358_78167|270aa									aminoglycoside phophotransferase-relatedprotein
OG_4984	SexF																		c1|ATCC19435_0236|116060_117214|385aa																					c2|N42_1478|78233_79387|385aa									Aspartate aminotransferase (EC 2.6.1.1)
OG_4985	SexF																		c1|ATCC19435_0237|117201_118124|308aa																					c2|N42_1479|79374_80297|308aa									hypothetical protein
OG_4986	SexF																		c1|ATCC19435_0238|118108_118770|221aa																					c2|N42_1480|80281_80943|221aa									hypothetical protein
OG_4987	SexF																		c1|ATCC19435_0239|118754_119089|112aa																					c2|N42_1481|80927_81262|112aa									hypothetical protein
OG_4988	SexF																		c1|ATCC19435_0240|119194_120396|401aa																					c2|N42_1482|81367_82569|401aa									DegT/DnrJ/EryC1/StrS aminotransferase
OG_4990	SexF																		c1|ATCC19435_0241|120368_121570|401aa																					c2|N42_1483|82541_83743|401aa									Transport protein
OG_4991	SexF																		c1|ATCC19435_0242|121567_123375|603aa																					c2|N42_1484|83740_85548|603aa									hypothetical protein
OG_4992	SexF																		c1|ATCC19435_0243|123460_124425|322aa																					c2|N42_1485|85633_86598|322aa									Molybdenum cofactor biosynthesis protein MoaA
OG_4993	SexF																		c1|ATCC19435_0244|124422_125507|362aa																					c2|N42_1486|86595_87680|362aa									hypothetical protein
OG_4994	SexF																		c1|ATCC19435_0245|125532_125993|154aa																					c2|N42_1487|87705_88166|154aa									hypothetical protein
OG_2496	SexF																		c1|ATCC19435_0246|126507_127403|299aa			c4|KF134_1021|170769_171674|302aa	c16|KF146_2227|22650_23537|296aa													c0|LMG9446_0838|11278_12183|302aa				c2|N42_1488|88680_89576|299aa		gi|KLDS_1280|1247729_1248139|137aa*							Positive transcriptional regulator, MutRfamily
OG_103	SexF		c138|FG2_1118|282_1400|373aa	c106|HP_2426|2183_3301|373aa	c119|LMG6897_1466|282_1400|373aa	gi|UC5099_2483|48678_49598|307aa		c124|SK110_0647|1367_2071|235aa	gi|SK11_2687|21461_22165|235aa	gi|A76_2700|932_2071|380aa					c46|NCDO763_2448|1022_2137|372aa	gi|MG1363_1427|1344187_1345302|372aa			c1|ATCC19435_0247|127416_129092|559aa		c11|E34_1041|28274_29794|507aa							c35|KF24_1811|8506_10023|506aa		c19|KF67_0706|29060_30577|506aa					c12|LMG8526_2327|25824_27527|568aa	c20|LMG9446_0132|13314_14831|506aa	c16|LMG9447_2076|18111_19628|506aa	c34|M20_1220|11993_13696|568aa		c2|N42_1489|89589_91265|559aa		gi|KLDS_1279|1246565_1247692|376aa		gi|IO1_1197|1238052_1239572|507aa	gi|CV56_0004|3203_4720|506aa		mobD	MobD relaxase/mobilization nuclease domain containing protein	Relaxase
OG_3191	SexF														c46|NCDO763_2451|5205_5561|119aa	gi|MG1363_1430|1348370_1348726|119aa			c1|ATCC19435_0248|129096_129461|122aa															c66|LMG8520_0853|5952_6308|119aa	c12|LMG8526_2328|27527_27886|120aa			c34|M20_1219|11637_11993|119aa		c2|N42_1490|91269_91634|122aa		gi|KLDS_1276|1243182_1243547|122aa							hypothetical protein
OG_4401	SexF																		c1|ATCC19435_0249|129705_129974|90aa																					c2|N42_1491|91878_92147|90aa		gi|KLDS_1275|1242662_1242931|90aa							hypothetical protein
OG_4335	SexF																		c1|ATCC19435_0250|129964_130983|340aa																					c2|N42_1492|92137_93156|340aa		gi|KLDS_1274|1241653_1242672|340aa							LtrC-like protein
OG_2944	SexF																		c1|ATCC19435_0251|131005_140511|3169aa						c19|KF201_0741|17706_20552|949aa	c35|KF282_0944|4255_4383|43aa	c20|K231_0142|16410_17948|513aa		c6|K337_1922|122479_127320|1614aa	c12|KF67_2477|6110_14278|2723aa							c10|LMG9447_2599|39013_46968|2652aa	c93|M20_0418|8_262|85aa		c2|N42_1493|93178_102684|3169aa		gi|KLDS_1273|1232113_1241631|3173aa		gi|IO1_1195|1233472_1235604|711aa		gi|KF147_2625|26029_26157|43aa			DNA methylase
OG_3216	SexF																		c1|ATCC19435_0252|140872_141435|188aa			c12|KF134_2306|1801_2394|198aa	c0|KF146_1521|34600_35193|198aa	c12|KF196_2269|63909_64502|198aa						c40|KF67_0728|5026_5619|198aa						c39|LMG9446_2491|1463_2056|198aa				c2|N42_1494|103045_103608|188aa									hypothetical protein
OG_4995	SexF																		c1|ATCC19435_0253|142013_142207|65aa																					c2|N42_1495|104186_104380|65aa									hypothetical protein
OG_4402	SexF																		c1|ATCC19435_0254|142511_144754|748aa																					c2|N42_1496|104684_106927|748aa		gi|KLDS_1269|1227467_1230196|910aa							hypothetical protein
OG_4996	SexF																		c1|ATCC19435_0255|144836_145060|75aa																					c2|N42_1497|107009_107233|75aa									hypothetical protein
OG_2771	SexF														c46|NCDO763_2457|11068_12138|357aa	gi|MG1363_1436|1354233_1355417|395aa			c1|ATCC19435_0256|145285_147462|726aa		c11|E34_1036|23287_24402|372aa							c16|KF24_1990|3777_4847|357aa						c66|LMG8520_0847|413_1009|199aa*	c12|LMG8526_2332|32177_33370|398aa		c10|LMG9447_2602|50671_53292|874aa	c34|M20_1213|6039_7223|395aa		c2|N42_1498|107458_109635|726aa		gi|KLDS_1268|1224960_1227137|726aa		gi|IO1_1201|1243442_1244557|372aa					LtrC-like protein
OG_4037	SexF																		c1|ATCC19435_0257|147455_148276|274aa																					c2|N42_1499|109628_110449|274aa		gi|KLDS_1267|1223993_1224967|325aa			gi|CV56_2243|2165165_2165977|271aa				Putative methyltransferase (EC 2.1.1.72)
OG_2164	SexF														c14|NCDO763_2527|46090_47928|613aa	gi|MG1363_1439|1356872_1358710|613aa			c1|ATCC19435_0258|148427_150244|606aa		c11|E34_1026|11226_13082|619aa														c12|LMG8526_2334|34512_36350|613aa		c16|LMG9447_2063|5579_7414|612aa			c2|N42_1500|110600_112417|606aa		gi|KLDS_1266|1222174_1223991|606aa							FIG00628985: hypothetical protein
OG_3456	SexF														c14|NCDO763_2526|45590_46093|168aa	gi|MG1363_1440|1358707_1359210|168aa			c1|ATCC19435_0259|150241_150762|174aa																c12|LMG8526_2335|36347_36850|168aa					c2|N42_1501|112414_112935|174aa		gi|KLDS_1265|1221656_1222177|174aa							hypothetical protein
OG_4403	SexF																		c1|ATCC19435_0260|150959_152464|502aa																					c2|N42_1502|113132_114637|502aa		gi|KLDS_1264|1219955_1221460|502aa							ATP-dependent DNA helicase UvrD/PcrA
OG_4404	SexF																		c1|ATCC19435_0261|152455_154173|573aa																					c2|N42_1503|114628_116346|573aa		gi|KLDS_1263|1218249_1219964|572aa							predicted ATP-dependent endonuclease, OLDfamily
OG_4405	SexF																		c1|ATCC19435_0262|154227_155045|273aa																					c2|N42_1504|116400_117218|273aa		gi|KLDS_1262|1217392_1218204|271aa							cell filamentation protein Fic-related protein
OG_4406	SexF																		c1|ATCC19435_0263|155035_156033|333aa																					c2|N42_1505|117208_118206|333aa		gi|KLDS_1261|1216354_1217337|328aa							Abortive infection protein AbiGII
OG_4407	SexF																		c1|ATCC19435_0264|156026_156607|194aa																					c2|N42_1506|118199_118780|194aa		gi|KLDS_1260|1215876_1216361|162aa							Abortive infection protein AbiGI
OG_4408	SexF																		c1|ATCC19435_0265|156676_157704|343aa																					c2|N42_1507|118849_119877|343aa		gi|KLDS_1259|1214668_1215702|345aa							MJ0042 family finger-like protein
OG_4409	SexF																		c1|ATCC19435_0266|157691_157990|100aa																					c2|N42_1508|119864_120163|100aa		gi|KLDS_1258|1214385_1214681|99aa							hypothetical protein
OG_3217	SexF														c14|NCDO763_2523|43126_43818|231aa	gi|MG1363_1443|1360982_1361674|231aa			c1|ATCC19435_0267|157990_158679|230aa		c11|E34_1032|19732_20334|201aa														c12|LMG8526_2341|39475_40167|231aa					c2|N42_1509|120163_120852|230aa		gi|KLDS_1257|1213696_1214385|230aa		gi|IO1_1205|1247510_1248112|201aa					hypothetical protein
OG_3218	SexF														c14|NCDO763_2521|40161_42773|871aa	gi|MG1363_1445|1362027_1364639|871aa			c1|ATCC19435_0268|158697_161288|864aa		c11|E34_1031|17111_19762|884aa														c12|LMG8526_2342|40189_42801|871aa					c2|N42_1510|120870_123461|864aa		gi|KLDS_1256|1211087_1213678|864aa		gi|IO1_1206|1248125_1250674|850aa					Immunogenic secreted protein
OG_2389	SexF														c14|NCDO763_2520|37767_40157|797aa	gi|MG1363_1446|1364643_1367033|797aa			c1|ATCC19435_0269|161301_163577|759aa		c11|E34_1030|15271_17124|618aa														c12|LMG8526_2343|42805_45051|749aa		c10|LMG9447_2593|31789_34065|759aa			c2|N42_1511|123474_125750|759aa		gi|KLDS_1255|1208701_1211076|792aa		gi|IO1_1207|1250721_1253138|806aa					FIG01115039: hypothetical protein
OG_3457	SexF														c14|NCDO763_2519|37460_37813|118aa	gi|MG1363_1447|1366987_1367340|118aa			c1|ATCC19435_0270|163600_163980|127aa																c12|LMG8526_2344|45149_45502|118aa					c2|N42_1512|125773_126153|127aa		gi|KLDS_1254|1208397_1208777|127aa							hypothetical protein
OG_3458	SexF														c14|NCDO763_2518|36670_37458|263aa	gi|MG1363_1448|1367342_1368130|263aa			c1|ATCC19435_0271|163980_164762|261aa																c12|LMG8526_2345|45504_46292|263aa					c2|N42_1513|126153_126935|261aa		gi|KLDS_1253|1207615_1208397|261aa							Tn5252, Orf23
OG_4410	SexF																		c1|ATCC19435_0272|164772_164999|76aa																					c2|N42_1514|126945_127172|76aa		gi|KLDS_1252|1207378_1207605|76aa							hypothetical protein
OG_4038	SexF																		c1|ATCC19435_0274|165188_171739|2184aa																					c2|N42_1516|127361_133912|2184aa		gi|KLDS_1249|1200762_1205135|1458aa*gi|KLDS_1250|1205323_1206876|518aa							Predicted cell-wall-anchored protein SasA(LPXTG motif)
OG_4998	SexF																		c1|ATCC19435_0275|171738_171899|54aa																					c2|N42_1517|133911_134072|54aa									hypothetical protein
OG_4411	SexF																		c1|ATCC19435_0276|172022_172396|125aa																					c2|N42_1518|134195_134569|125aa		gi|KLDS_1236|1190697_1191083|129aa							hypothetical protein
OG_3192	SexF																		c1|ATCC19435_0277|172399_172845|149aa											c12|KF67_2505|39440_39895|152aa								c32|M20_1290|24679_25140|154aa c30|M20_2025|464_916|151aa		c2|N42_1519|134572_135036|155aa		gi|KLDS_1235|1190248_1190694|149aa							hypothetical protein
OG_4039	SexF																		c1|ATCC19435_0278|172870_173034|55aa																					c2|N42_1520|135043_135207|55aa		gi|KLDS_1234|1190058_1190225|56aa							hypothetical protein
OG_5000	SexF																		c1|ATCC19435_0279|173490_173744|85aa																					c2|N42_1521|135663_135917|85aa									Mobile element protein
OG_4412	SexF																		c1|ATCC19435_0280|174101_176434|778aa																		c10|LMG9447_2601|48204_50537|778aa			c2|N42_1523|136274_138607|778aa									putative serine protease
OG_4414	SexF																		c1|ATCC19435_0281|176424_177527|368aa																		c10|LMG9447_2600|47109_48203|365aa			c2|N42_1524|138597_139700|368aa								AAA+-type ATPase, SpoVK/Ycf46/Vps4 family	Cell division protein FtsH (EC 3.4.24.-)
OG_5001	SexF																		c1|ATCC19435_0282|177769_177909|47aa																					c2|N42_1525|139942_140082|47aa									hypothetical protein

## Sheet: sex factor sorted LMG8526
Table S11: Sex factor gene cluster
OG	cluster	B40	FG2	HP	LMG6897	UC509_9	AM2	SK110	SK11	A76	KW10	KW2	N41	V4	NCDO763	MG1363	P7266	ATCC19435	DRA4	E34	KF134	KF146	KF196	KF201	KF282	K231	KF24	K337	KF67	KF7	Li1	LMG14418	LMG8520	LMG8526	LMG9446	LMG9447	M20	ML8	N42	UC317	KLDS	IL1403	IO_1	CV56	KF147	gene	improved annotation	function
OG_1916	SexF	c82|B40_0346|8258_8554|99aa	c145|FG2_1883|4136_4432|99aa	c124|HP_1677|4500_4796|99aa	c52|LMG6897_0402|274_570|99aa	gi|UC5099_2534|41392_41688|99aa	c72|AM2_1555|8253_8549|99aa	c63|SK110_2014|8253_8549|99aa	gi|SK11_2634|15716_16012|99aa	gi|A76_2689|39730_40026|99aa				c26|V4_1667|12759_13055|99aa				c34|ATCC19435_1194|8695_8991|99aa	c103|DRA4_1963|554_850|99aa			c29|KF146_2413|1422_1718|99aa			c17|KF282_0964|14086_14382|99aa		c79|KF24_2132|1273_1569|99aa		c77|KF67_1805|750_1046|99aa		c29|Li1_2352|4436_4732|99aa			c12|LMG8526_2302|810_1106|99aa	c29|LMG9446_1223|4060_4356|99aa	c55|LMG9447_0632|3999_4295|99aa	c57|M20_0705|7490_7786|99aa c121|M20_1379|82_378|99aa		c86|N42_2048|475_771|99aa	c115|UC317_1211|475_771|99aa								hypothetical protein
OG_3415	SexF									gi|A76_1040|979266_979967|234aa				c33|V4_1224|4632_4940|103aa*								c29|KF146_2414|1753_2448|232aa												c12|LMG8526_2303|1141_1836|232aa	c38|LMG9446_1495|3926_4186|87aa		c57|M20_0706|7821_8516|232aa c77|M20_0944|50_745|232aa											hypothetical protein
OG_5428	SexF																					c29|KF146_2415|2503_2991|163aa												c12|LMG8526_2304|1891_2379|163aa														DNA-3-methyladenine glycosylase (EC 3.2.2.20)
OG_5429	SexF																					c29|KF146_2416|3344_4483|380aa												c12|LMG8526_2305|2732_3871|380aa														Pectate lyase precursor (EC 4.2.2.2)
OG_185	SexF	c207|B40_0812|132_713|194aa c162|B40_2339|121_678|186aa	c237|FG2_1214|232_792|187aa	c124|HP_1674|354_935|194aa	c52|LMG6897_0406|4277_4717|147aa	gi|UC5099_2516|24142_24723|194aa gi|UC5099_2450|20950_21507|186aa	c64|AM2_1951|132_713|194aa	c66|SK110_0818|132_713|194aa	gi|SK11_2625|6798_7379|194aa	gi|A76_2674|26310_26891|194aa			c47|N41_0608|96_677|194aa		c49|NCDO763_0074|196_777|194aa		c17|P7266_0554|9017_9580|188aa	c32|ATCC19435_1229|134_715|194aa	c36|DRA4_0084|133_714|194aa			c29|KF146_2417|4881_5462|194aa	c17|KF196_1787|538_1110|191aa		c34|KF282_2370|240_797|186aa		c101|KF24_0603|667_1251|195aa c100|KF24_2026|273_833|187aa		c19|KF67_0680|363_923|187aa		c23|Li1_2247|2276_2857|194aa			c12|LMG8526_2306|4269_4829|187aa	c30|LMG9446_1949|1572_2135|188aa	c47|LMG9447_0552|5838_6407|190aa c46|LMG9447_2677|2488_3057|190aa	c52|M20_0695|6596_7048|151aa c43|M20_1538|676_1257|194aa	c55|ML8_0365|133_714|194aa	c40|N42_1592|132_713|194aa	c52|UC317_0647|133_714|194aa				gi|CV56_0017|13860_14426|189aa gi|CV56_2500|27904_28470|189aa gi|CV56_2541|26750_27316|189aa				Site-specific recombinase, DNA invertase Pinrelated protein
OG_4568	SexF																											c23|K337_1792|18758_19615|286aa						c12|LMG8526_2307|5007_5867|287aa									gi|IO1_1185|1220040_1220897|286aa					hypothetical protein
OG_6049	SexF																																	c12|LMG8526_2308|5912_7063|384aa														hypothetical protein
OG_5064	SexF																					c16|KF146_2213|7879_8730|284aa												c12|LMG8526_2309|8582_9433|284aa														Phenazine biosynthesis protein PhzF like
OG_4248	SexF																c6|P7266_0824|74845_75825|327aa					c16|KF146_2214|9258_10241|328aa							c2|KF67_0203|599_1582|328aa					c12|LMG8526_2310|9750_10733|328aa														UDP-glucose 4-epimerase (EC 5.1.3.2)
OG_5415	SexF																					c16|KF146_2215|11010_11528|173aa												c12|LMG8526_2311|11501_12019|173aa														FMN reductase (EC 1.5.1.29)
OG_3985	SexF																							c0|KF201_1725|282715_283077|121aa				c24|K337_2289|6849_7211|121aa						c12|LMG8526_2312|12408_12776|123aa			c43|M20_1540|3677_4039|121aa											hypothetical protein
OG_2249	SexF	c221|B40_1998|221_445|75aa*	c98|FG2_2452|9638_9862|75aa*	c90|HP_0659|9638_9862|75aa*	c87|LMG6897_2321|221_445|75aa*	gi|UC5099_1672|1576698_1576922|75aa*	c57|AM2_0746|13421_13645|75aa*	c57|SK110_0703|13421_13645|75aa*	gi|SK11_1777|1660776_1661000|75aa*	gi|A76_0864|813602_813826|75aa*		gi|KW2_1596|1688813_1689037|75aa*	c5|N41_1951|60862_61284|141aa	c15|V4_1356|45178_45402|75aa*	c8|NCDO763_0045|46345_46767|141aa	gi|MG1363_0879|821178_821600|141aa																		c12|LMG8526_2313|12782_12949|56aa*			c43|M20_1541|4045_4353|103aa*											hypothetical protein
OG_5414	SexF																					c16|KF146_2209|5574_5708|45aa												c12|LMG8526_2314|13193_13585|131aa														hypothetical protein
OG_6047	SexF																																	c12|LMG8526_2316|14584_16194|537aa														conserved hypothetical protein, (pXO1-133)
OG_6048	SexF																																	c12|LMG8526_2317|16646_18100|485aa														hypothetical protein
OG_2652	SexF												c69|N41_0745|137_439|101aa	c26|V4_1661|9395_9526|44aa	c44|NCDO763_0578|11493_11795|101aa	gi|MG1363_0734|694698_695000|101aa						c16|KF146_2238|36172_36474|101aa			c0|KF282_2117|199005_199298|98aa		c17|KF24_0495|34292_34585|98aa							c12|LMG8526_2318|18321_18623|101aa			c52|M20_0687|2082_2384|101aa	c95|ML8_0848|136_438|101aa	c38|N42_1620|9606_9908|101aa	c83|UC317_1995|137_439|101aa			gi|IO1_0996|1023583_1023876|98aa					hypothetical protein
OG_2653	SexF												c69|N41_0746|432_707|92aa	c26|V4_1662|9690_9965|92aa	c44|NCDO763_0579|11788_12063|92aa	gi|MG1363_0735|694993_695268|92aa						c16|KF146_2237|35904_36179|92aa			c0|KF282_2118|199291_199566|92aa		c17|KF24_0496|34578_34853|92aa				c3|Li1_1610|226_501|92aa			c12|LMG8526_2319|18616_18891|92aa			c52|M20_0688|2377_2652|92aa	c95|ML8_0849|431_706|92aa	c38|N42_1621|9901_10176|92aa	c83|UC317_1996|432_707|92aa			gi|IO1_0995|1023315_1023590|92aa					hypothetical protein
OG_2769	SexF												c69|N41_0747|937_1281|115aa	c26|V4_1663|10195_10539|115aa	c44|NCDO763_0580|12293_12637|115aa	gi|MG1363_0736|695498_695842|115aa						c16|KF146_2236|35330_35674|115aa												c12|LMG8526_2320|19121_19465|115aa	c18|LMG9446_1256|15804_16148|115aa	c16|LMG9447_2055|841_1185|115aa	c52|M20_0689|2882_3226|115aa	c95|ML8_0850|936_1280|115aa	c38|N42_1622|10406_10750|115aa	c83|UC317_1997|937_1281|115aa								Transcriptional regulator, PadR family
OG_2715	SexF												c69|N41_0748|1278_2105|276aa	c26|V4_1664|10536_11363|276aa	c44|NCDO763_0581|12634_13461|276aa	gi|MG1363_0737|695839_696666|276aa						c16|KF146_2235|34506_35333|276aa												c12|LMG8526_2321|19462_20289|276aa	c18|LMG9446_1257|16145_16972|276aa	c16|LMG9447_2054|17_844|276aa	c52|M20_0690|3223_3798|192aa*	c95|ML8_0851|1277_2104|276aa	c38|N42_1623|10747_11574|276aa	c83|UC317_1998|1278_2105|276aa								hypothetical protein
OG_4329	SexF																								c3|KF282_1778|1117_2205|363aa									c12|LMG8526_2322|20387_21475|363aa			c52|M20_0692|4147_5235|363aa											Choline binding protein A
OG_4330	SexF																								c3|KF282_1779|2531_3058|176aa									c12|LMG8526_2323|21801_22073|91aa			c52|M20_0693|5561_6088|176aa											hypothetical protein
OG_6092	SexF																																	c12|LMG8526_2324|22125_22328|68aa														hypothetical protein
OG_3573	SexF																								c3|KF282_1780|3060_3569|170aa									c12|LMG8526_2325|22330_22755|142aa			c52|M20_0694|6090_6599|170aa											DUF1706 domain-containing protein
OG_3855	SexF												c45|N41_1269|10361_10996|212aa													c20|K231_0138|10283_11335|351aa								c12|LMG8526_2326|23431_24573|381aa														hypothetical protein
OG_103	SexF		c138|FG2_1118|282_1400|373aa	c106|HP_2426|2183_3301|373aa	c119|LMG6897_1466|282_1400|373aa	gi|UC5099_2483|48678_49598|307aa		c124|SK110_0647|1367_2071|235aa	gi|SK11_2687|21461_22165|235aa	gi|A76_2700|932_2071|380aa					c46|NCDO763_2448|1022_2137|372aa	gi|MG1363_1427|1344187_1345302|372aa		c1|ATCC19435_0247|127416_129092|559aa		c11|E34_1041|28274_29794|507aa							c35|KF24_1811|8506_10023|506aa		c19|KF67_0706|29060_30577|506aa					c12|LMG8526_2327|25824_27527|568aa	c20|LMG9446_0132|13314_14831|506aa	c16|LMG9447_2076|18111_19628|506aa	c34|M20_1220|11993_13696|568aa		c2|N42_1489|89589_91265|559aa		gi|KLDS_1279|1246565_1247692|376aa		gi|IO1_1197|1238052_1239572|507aa	gi|CV56_0004|3203_4720|506aa		mobD	MobD relaxase/mobilization nuclease domain containing protein	Relaxase
OG_3191	SexF														c46|NCDO763_2451|5205_5561|119aa	gi|MG1363_1430|1348370_1348726|119aa		c1|ATCC19435_0248|129096_129461|122aa															c66|LMG8520_0853|5952_6308|119aa	c12|LMG8526_2328|27527_27886|120aa			c34|M20_1219|11637_11993|119aa		c2|N42_1490|91269_91634|122aa		gi|KLDS_1276|1243182_1243547|122aa							hypothetical protein
OG_3579	SexF														c46|NCDO763_2453|6539_7015|159aa	gi|MG1363_1432|1349704_1350180|159aa																	c66|LMG8520_0852|5159_5539|127aa	c12|LMG8526_2329|28145_28621|159aa			c34|M20_1217|10397_10864|156aa											hypothetical protein
OG_1795	SexF														c46|NCDO763_2454|7088_8740|551aa	gi|MG1363_1433|1350253_1351905|551aa																	c66|LMG8520_0851|3434_5086|551aa	c12|LMG8526_2330|28694_30346|551aa			c34|M20_1216|8672_10324|551aa						gi|IO1_1200|1241320_1243287|656aa					hypothetical protein
OG_3578	SexF														c46|NCDO763_2455|8792_10558|589aa	gi|MG1363_1434|1351957_1353723|589aa																	c66|LMG8520_0850|1841_3382|514aa*	c12|LMG8526_2331|30398_32164|589aa			c34|M20_1215|7739_8620|294aa*											LtrM
OG_2771	SexF														c46|NCDO763_2457|11068_12138|357aa	gi|MG1363_1436|1354233_1355417|395aa		c1|ATCC19435_0256|145285_147462|726aa		c11|E34_1036|23287_24402|372aa							c16|KF24_1990|3777_4847|357aa						c66|LMG8520_0847|413_1009|199aa*	c12|LMG8526_2332|32177_33370|398aa		c10|LMG9447_2602|50671_53292|874aa	c34|M20_1213|6039_7223|395aa		c2|N42_1498|107458_109635|726aa		gi|KLDS_1268|1224960_1227137|726aa		gi|IO1_1201|1243442_1244557|372aa					LtrC-like protein
OG_3752	SexF														c14|NCDO763_2528|47954_49018|355aa	gi|MG1363_1438|1355782_1356846|355aa																		c12|LMG8526_2333|33431_34486|352aa			c34|M20_1210|4246_4857|204aa*											hypothetical protein
OG_2164	SexF														c14|NCDO763_2527|46090_47928|613aa	gi|MG1363_1439|1356872_1358710|613aa		c1|ATCC19435_0258|148427_150244|606aa		c11|E34_1026|11226_13082|619aa														c12|LMG8526_2334|34512_36350|613aa		c16|LMG9447_2063|5579_7414|612aa			c2|N42_1500|110600_112417|606aa		gi|KLDS_1266|1222174_1223991|606aa							FIG00628985: hypothetical protein
OG_3456	SexF														c14|NCDO763_2526|45590_46093|168aa	gi|MG1363_1440|1358707_1359210|168aa		c1|ATCC19435_0259|150241_150762|174aa																c12|LMG8526_2335|36347_36850|168aa					c2|N42_1501|112414_112935|174aa		gi|KLDS_1265|1221656_1222177|174aa							hypothetical protein
OG_6105	SexF																																	c12|LMG8526_2336|36904_37287|128aa														hypothetical protein
OG_6106	SexF																																	c12|LMG8526_2337|37303_37473|57aa														hypothetical protein
OG_6107	SexF																																	c12|LMG8526_2338|37491_37682|64aa														hypothetical protein
OG_4099	SexF														c14|NCDO763_2525|44064_45377|438aa	gi|MG1363_1441|1359423_1360736|438aa																		c12|LMG8526_2339|37895_39229|445aa														hypothetical protein
OG_4100	SexF														c14|NCDO763_2524|43819_44064|82aa	gi|MG1363_1442|1360736_1360981|82aa																		c12|LMG8526_2340|39229_39474|82aa														hypothetical protein
OG_3217	SexF														c14|NCDO763_2523|43126_43818|231aa	gi|MG1363_1443|1360982_1361674|231aa		c1|ATCC19435_0267|157990_158679|230aa		c11|E34_1032|19732_20334|201aa														c12|LMG8526_2341|39475_40167|231aa					c2|N42_1509|120163_120852|230aa		gi|KLDS_1257|1213696_1214385|230aa		gi|IO1_1205|1247510_1248112|201aa					hypothetical protein
OG_3218	SexF														c14|NCDO763_2521|40161_42773|871aa	gi|MG1363_1445|1362027_1364639|871aa		c1|ATCC19435_0268|158697_161288|864aa		c11|E34_1031|17111_19762|884aa														c12|LMG8526_2342|40189_42801|871aa					c2|N42_1510|120870_123461|864aa		gi|KLDS_1256|1211087_1213678|864aa		gi|IO1_1206|1248125_1250674|850aa					Immunogenic secreted protein
OG_2389	SexF														c14|NCDO763_2520|37767_40157|797aa	gi|MG1363_1446|1364643_1367033|797aa		c1|ATCC19435_0269|161301_163577|759aa		c11|E34_1030|15271_17124|618aa														c12|LMG8526_2343|42805_45051|749aa		c10|LMG9447_2593|31789_34065|759aa			c2|N42_1511|123474_125750|759aa		gi|KLDS_1255|1208701_1211076|792aa		gi|IO1_1207|1250721_1253138|806aa					FIG01115039: hypothetical protein
OG_3457	SexF														c14|NCDO763_2519|37460_37813|118aa	gi|MG1363_1447|1366987_1367340|118aa		c1|ATCC19435_0270|163600_163980|127aa																c12|LMG8526_2344|45149_45502|118aa					c2|N42_1512|125773_126153|127aa		gi|KLDS_1254|1208397_1208777|127aa							hypothetical protein
OG_3458	SexF														c14|NCDO763_2518|36670_37458|263aa	gi|MG1363_1448|1367342_1368130|263aa		c1|ATCC19435_0271|163980_164762|261aa																c12|LMG8526_2345|45504_46292|263aa					c2|N42_1513|126153_126935|261aa		gi|KLDS_1253|1207615_1208397|261aa						membrane protein	Tn5252, Orf23
OG_4101	SexF														c14|NCDO763_2517|36431_36658|76aa	gi|MG1363_1449|1368142_1368369|76aa																		c12|LMG8526_2346|46304_46531|76aa														hypothetical protein
OG_3643	SexF														c14|NCDO763_2516|35981_36379|133aa	gi|MG1363_1450|1368421_1368819|133aa																		c12|LMG8526_2347|46583_46981|133aa		c10|LMG9447_2586|26518_26931|138aa					gi|KLDS_1251|1206887_1207303|139aa							hypothetical protein
OG_2110	SexF																																	c12|LMG8526_2348|47346_50612|1089aa													cell surface protein, LPxTG anchor
OG_4887	SexF																																	c12|LMG8526_2349|51119_51343|75aa			c32|M20_1286|22548_22772|75aa											hypothetical protein
OG_6077	SexF																																	c12|LMG8526_2350|51330_51557|76aa														hypothetical protein
OG_5585	SexF																												c12|KF67_2503|37716_38312|199aa					c12|LMG8526_2351|51642_51923|94aa														hypothetical protein
OG_3538	SexF																			c11|E34_1022|4660_5709|350aa							c16|KF24_2003|18578_19591|338aa		c12|KF67_2504|38380_39423|348aa					c12|LMG8526_2352|52004_53044|347aa		c10|LMG9447_2584|20642_21703|354aa							gi|IO1_1215|1262220_1263275|352aa					Secreted antigen GbpB/SagA/PcsB, putativepeptidoglycan hydrolase
OG_4102	SexF														c14|NCDO763_2512|30330_30629|100aa	gi|MG1363_1453|1374171_1374470|100aa																		c12|LMG8526_2353|53062_53358|99aa														Chaperone protein DnaJ
OG_3478	SexF														c14|NCDO763_2511|29334_29696|121aa	gi|MG1363_1454|1375104_1375466|121aa				c11|E34_1020|3800_4162|121aa													c84|LMG8520_0689|1060_1377|106aa	c12|LMG8526_2354|53774_54136|121aa									gi|IO1_1216|1263775_1264137|121aa					hypothetical protein
OG_3130	SexF														c14|NCDO763_2506|27489_27686|66aa	gi|MG1363_1459|1377114_1377311|66aa												c29|K337_2277|7623_7796|58aa	c12|KF67_2508|41645_41836|64aa				c70|LMG8520_0673|2102_2314|71aa c84|LMG8520_0690|1833_2069|79aa c68|LMG8520_2676|1296_1508|71aa	c12|LMG8526_2355|54594_54830|79aa		c10|LMG9447_2576|15847_16041|65aa												hypothetical protein
OG_2252	SexF	c166|B40_2253|1260_1877|206aa	c172|FG2_1222|120_737|206aa	c155|HP_2159|120_737|206aa	c146|LMG6897_1166|2318_2935|206aa	gi|UC5099_2488|51911_52528|206aa				gi|A76_2762|51739_52356|206aa			c52|N41_0718|119_721|201aa		c58|NCDO763_2017|120_722|201aa							c16|KF146_2222|18218_18661|148aa							c12|KF67_2511|43784_44491|236aa				c68|LMG8520_2677|2405_3271|289aa c95|LMG8520_1482|391_1089|233aa	c12|LMG8526_2356|55678_56412|245aa	c20|LMG9446_0131|12706_12837|44aa	c50|LMG9447_1831|2077_2268|64aa	c46|M20_2600|10551_11312|254aa	c61|ML8_1857|29_586|186aa	c60|N42_2678|2792_3409|206aa									Pleiotropic regulator of exopolysaccharidesynthesis, competence and biofilm formation Ftr, XREfamily
OG_2066	SexF	c114|B40_1287|352_1506|385aa	c121|FG2_2098|4776_5930|385aa	c158|HP_0972|131_1285|385aa	c148|LMG6897_0857|131_1285|385aa	gi|UC5099_2526|31210_31974|255aa	c98|AM2_2095|354_1508|385aa	c97|SK110_0653|3861_5015|385aa	gi|SK11_2643|25430_26584|385aa	gi|A76_2646|225_1379|385aa								c40|ATCC19435_1504|96_1250|385aa	c55|DRA4_0636|486_1640|385aa			c16|KF146_2223|19014_20168|385aa							c19|KF67_0709|31565_32719|385aa				c68|LMG8520_2678|3418_4572|385aa	c12|LMG8526_2357|56708_57868|387aa	c20|LMG9446_0130|11299_12453|385aa		c46|M20_2599|9098_10258|387aa	c68|ML8_1437|5645_6799|385aa	c45|N42_1351|5628_6782|385aa	c68|UC317_2565|3757_4911|385aa								Replication protein
OG_4884	SexF																																	c12|LMG8526_2358|58660_58926|89aa														hypothetical protein
OG_2096	SexF	c135|B40_1155|1963_2196|78aa	c125|FG2_1572|4375_4608|78aa	c112|HP_2009|4375_4608|78aa	c107|LMG6897_1480|4375_4608|78aa	gi|UC5099_2424|2906_3139|78aa				gi|A76_2759|48110_48343|78aa			c52|N41_0720|3126_3359|78aa		c58|NCDO763_2019|3127_3360|78aa										c17|KF282_0979|33511_33744|78aa	c19|K231_0669|7844_8077|78aa	c72|KF24_1704|2759_2992|78aa		c12|KF67_2514|46934_47167|78aa	c19|KF7_0608|2811_3044|78aa	c33|Li1_1234|1894_2127|78aa		c58|LMG8520_2093|5320_5550|77aa	c12|LMG8526_2359|59182_59415|78aa	c36|LMG9446_0112|3220_3453|78aa	c50|LMG9447_1833|4670_4903|78aa	c46|M20_2597|7851_8084|78aa	c61|ML8_1860|3982_4215|78aa	c54|N42_2144|4414_4647|78aa						gi|KF147_2595|2448_2681|78aa			hypothetical protein
OG_2095	SexF	c135|B40_1154|1195_1953|253aa	c125|FG2_1571|3607_4365|253aa	c112|HP_2008|3607_4365|253aa	c107|LMG6897_1479|3607_4365|253aa	gi|UC5099_2425|3149_3907|253aa				gi|A76_2758|47342_48100|253aa			c52|N41_0721|3369_4127|253aa		c58|NCDO763_2020|3370_4128|253aa										c17|KF282_0978|32743_33501|253aa	c19|K231_0670|8087_8845|253aa	c72|KF24_1705|3002_3760|253aa		c12|KF67_2515|47177_47935|253aa	c19|KF7_0609|3054_3812|253aa	c33|Li1_1233|1126_1884|253aa		c58|LMG8520_2092|4554_5309|252aa	c12|LMG8526_2360|59425_60183|253aa	c36|LMG9446_0113|3463_4221|253aa	c50|LMG9447_1834|4913_5671|253aa	c46|M20_2596|7083_7841|253aa	c61|ML8_1861|4225_4983|253aa	c54|N42_2143|3646_4404|253aa						gi|KF147_2596|2691_3449|253aa			chr (plasmid) partitioning protein ParA/ Sporulation initiation inhibitor protein Soj
OG_2094	SexF	c135|B40_1153|463_1161|233aa	c125|FG2_1570|2875_3603|243aa	c112|HP_2007|2875_3573|233aa	c107|LMG6897_1478|2875_3573|233aa	gi|UC5099_2426|4292_4639|116aa				gi|A76_2757|46610_47308|233aa			c52|N41_0722|4132_4860|243aa		c58|NCDO763_2021|4133_4861|243aa										c17|KF282_0977|32011_32739|243aa	c19|K231_0671|8849_9577|243aa	c72|KF24_1706|3764_4492|243aa		c12|KF67_2516|47939_48667|243aa	c19|KF7_0610|3816_4544|243aa	c33|Li1_1232|394_1092|233aa		c58|LMG8520_2091|3832_4551|240aa	c12|LMG8526_2361|60187_60915|243aa	c36|LMG9446_0114|4225_4953|243aa	c50|LMG9447_1835|5676_6404|243aa	c46|M20_2595|6351_7079|243aa	c61|ML8_1862|4987_5715|243aa	c54|N42_2142|2914_3612|233aa						gi|KF147_2597|3483_4181|233aa			ParB protein
OG_4363	SexF																												c12|KF67_2517|48735_48887|51aa					c12|LMG8526_2362|60983_61135|51aa			c46|M20_2594|6131_6283|51aa											hypothetical protein
OG_2240	SexF												c48|N41_2064|793_1818|342aa				c12|P7266_1540|78676_79701|342aa									c20|K231_0135|7215_8240|342aa	c64|KF24_2092|2150_3175|342aa		c12|KF67_2518|48904_49929|342aa	c1|KF7_0335|523_2076|518aa	c24|Li1_1249|5581_6615|345aa			c12|LMG8526_2363|61152_62177|342aa	c19|LMG9446_0454|8162_9187|342aa	c48|LMG9447_2170|4610_5635|342aa	c46|M20_2593|5088_6113|342aa						gi|IO1_1178|1213604_1214629|342aa	gi|CV56_0019|17495_18322|276aa gi|CV56_2488|18601_19626|342aa				RecA protein
OG_2294	SexF		c1|FG2_0112|37230_37586|119aa							gi|A76_1568|1458817_1459221|135aa	c3|KW10_1182|25313_25705|131aa		c48|N41_2065|1830_2159|110aa				c12|P7266_1541|79716_80114|133aa	c1|ATCC19435_0228|107982_108125|48aa		c11|E34_1057|46998_47390|131aa				c24|KF201_2249|1830_2222|131aa		c20|K231_0136|8255_8647|131aa	c64|KF24_2091|1743_2135|131aa		c12|KF67_2519|49944_50270|109aa		c24|Li1_1248|5174_5566|131aa			c12|LMG8526_2364|62192_62518|109aa	c19|LMG9446_0455|9202_9594|131aa	c48|LMG9447_2169|4269_4598|110aa c82|LMG9447_0555|630_1022|131aa	c46|M20_2592|4747_5073|109aa		c2|N42_1470|70155_70298|48aa		gi|KLDS_1299|1267178_1267582|135aa		gi|IO1_1179|1214644_1215036|131aa	gi|CV56_2489|19639_20034|132aa				hypothetical protein
OG_22	SexF		c1|FG2_0111|35777_37240|488aa c125|FG2_1568|1039_2505|489aa	c112|HP_2005|1039_2505|489aa	c107|LMG6897_1476|1039_2505|489aa	gi|UC5099_2428|5008_6474|489aa gi|UC5099_2453|22053_23519|489aa	c92|AM2_0864|1108_2106|333aa c92|AM2_0865|2103_2573|157aa	c127|SK110_0753|1108_2106|333aa	gi|SK11_2728|62032_63030|333aa gi|SK11_2729|63027_63497|157aa	gi|A76_2754|44623_45957|445aa* gi|A76_2755|45926_46240|105aa*	c3|KW10_1183|25702_27153|484aa		c52|N41_0724|5230_6147|306aa c48|N41_2066|2222_3673|484aa	c34|V4_2265|1564_2778|405aa c34|V4_2266|2736_3029|98aa	c58|NCDO763_2023|5231_5959|243aa		c6|P7266_0749|10825_12291|489aa c12|P7266_1542|80111_81577|489aa	c1|ATCC19435_0229|108177_109571|465aa		c11|E34_1056|45535_47001|489aa				c24|KF201_2248|391_1833|481aa	c17|KF282_0975|30098_31642|515aa	c20|K231_0137|8644_10086|481aa c19|K231_0673|9947_11413|489aa	c64|KF24_2090|295_1746|484aa		c19|KF67_0713|34580_36046|489aa c12|KF67_2520|50333_51799|489aa	c19|KF7_0613|4913_6379|489aa	c24|Li1_1247|3711_5177|489aa		c100|LMG8520_1944|215_685|157aa c41|LMG8520_0380|18404_19132|243aa	c12|LMG8526_2365|62581_64047|489aa	c20|LMG9446_0126|7972_9438|489aa c19|LMG9446_0456|9591_11057|489aa	c82|LMG9447_0556|1019_2485|489aa c16|LMG9447_2081|23314_24858|515aa c48|LMG9447_2168|2740_4206|489aa	c46|M20_2591|3218_4684|489aa	c6|ML8_2159|45032_46498|489aa	c2|N42_1471|70350_71744|465aa c54|N42_2140|1222_2544|441aa c46|N42_2676|5642_6706|355aa				gi|IO1_1180|1215033_1216484|484aa	gi|CV56_2490|20031_21497|489aa	gi|KF147_2599|4551_6017|489aa			ImpB/MucB/SamB family protein
OG_2960	SexF																																	c12|LMG8526_2366|64266_64904|213aa														hypothetical protein
OG_4452	SexF																																	c12|LMG8526_2367|64920_65645|242aa														hypothetical protein

## Sheet: sex factor  sorted IO-1
Table S11: Sex factor gene cluster
OG	cluster	B40	FG2	HP	LMG6897	UC509_9	AM2	SK110	SK11	A76	KW10	KW2	N41	V4	NCDO763	MG1363	P7266		ATCC19435	DRA4	E34	KF134	KF146	KF196	KF201	KF282	K231	KF24	K337	KF67	KF7	Li1	LMG14418	LMG8520	LMG8526	LMG9446	LMG9447	M20	ML8	N42	UC317	KLDS	IL1403	IO_1	CV56	KF147	gene	improved annotation	function
OG_7154	SexF																																											gi|IO1_1176|1212514_1212801|96aa					FIG00565097: hypothetical protein
OG_5216	SexF																					c0|KF134_1728|197393_197902|170aa																						gi|IO1_1177|1212918_1213412|165aa					hypothetical protein
OG_2240	SexF												c48|N41_2064|793_1818|342aa				c12|P7266_1540|78676_79701|342aa										c20|K231_0135|7215_8240|342aa	c64|KF24_2092|2150_3175|342aa		c12|KF67_2518|48904_49929|342aa	c1|KF7_0335|523_2076|518aa	c24|Li1_1249|5581_6615|345aa			c12|LMG8526_2363|61152_62177|342aa	c19|LMG9446_0454|8162_9187|342aa	c48|LMG9447_2170|4610_5635|342aa	c46|M20_2593|5088_6113|342aa						gi|IO1_1178|1213604_1214629|342aa	gi|CV56_0019|17495_18322|276aa gi|CV56_2488|18601_19626|342aa				RecA protein
OG_2294	SexF		c1|FG2_0112|37230_37586|119aa							gi|A76_1568|1458817_1459221|135aa	c3|KW10_1182|25313_25705|131aa		c48|N41_2065|1830_2159|110aa				c12|P7266_1541|79716_80114|133aa		c1|ATCC19435_0228|107982_108125|48aa		c11|E34_1057|46998_47390|131aa				c24|KF201_2249|1830_2222|131aa		c20|K231_0136|8255_8647|131aa	c64|KF24_2091|1743_2135|131aa		c12|KF67_2519|49944_50270|109aa		c24|Li1_1248|5174_5566|131aa			c12|LMG8526_2364|62192_62518|109aa	c19|LMG9446_0455|9202_9594|131aa	c48|LMG9447_2169|4269_4598|110aa c82|LMG9447_0555|630_1022|131aa	c46|M20_2592|4747_5073|109aa		c2|N42_1470|70155_70298|48aa		gi|KLDS_1299|1267178_1267582|135aa		gi|IO1_1179|1214644_1215036|131aa	gi|CV56_2489|19639_20034|132aa				hypothetical protein
OG_22	SexF		c1|FG2_0111|35777_37240|488aa c125|FG2_1568|1039_2505|489aa	c112|HP_2005|1039_2505|489aa	c107|LMG6897_1476|1039_2505|489aa	gi|UC5099_2428|5008_6474|489aa gi|UC5099_2453|22053_23519|489aa	c92|AM2_0864|1108_2106|333aa c92|AM2_0865|2103_2573|157aa	c127|SK110_0753|1108_2106|333aa	gi|SK11_2728|62032_63030|333aa gi|SK11_2729|63027_63497|157aa	gi|A76_2754|44623_45957|445aa* gi|A76_2755|45926_46240|105aa*	c3|KW10_1183|25702_27153|484aa		c52|N41_0724|5230_6147|306aa c48|N41_2066|2222_3673|484aa	c34|V4_2265|1564_2778|405aa c34|V4_2266|2736_3029|98aa	c58|NCDO763_2023|5231_5959|243aa		c6|P7266_0749|10825_12291|489aa c12|P7266_1542|80111_81577|489aa		c1|ATCC19435_0229|108177_109571|465aa		c11|E34_1056|45535_47001|489aa				c24|KF201_2248|391_1833|481aa	c17|KF282_0975|30098_31642|515aa	c20|K231_0137|8644_10086|481aa c19|K231_0673|9947_11413|489aa	c64|KF24_2090|295_1746|484aa		c19|KF67_0713|34580_36046|489aa c12|KF67_2520|50333_51799|489aa	c19|KF7_0613|4913_6379|489aa	c24|Li1_1247|3711_5177|489aa		c100|LMG8520_1944|215_685|157aa c41|LMG8520_0380|18404_19132|243aa	c12|LMG8526_2365|62581_64047|489aa	c20|LMG9446_0126|7972_9438|489aa c19|LMG9446_0456|9591_11057|489aa	c82|LMG9447_0556|1019_2485|489aa c16|LMG9447_2081|23314_24858|515aa c48|LMG9447_2168|2740_4206|489aa	c46|M20_2591|3218_4684|489aa	c6|ML8_2159|45032_46498|489aa	c2|N42_1471|70350_71744|465aa c54|N42_2140|1222_2544|441aa c46|N42_2676|5642_6706|355aa				gi|IO1_1180|1215033_1216484|484aa	gi|CV56_2490|20031_21497|489aa	gi|KF147_2599|4551_6017|489aa			ImpB/MucB/SamB family protein
OG_5680	SexF																				c11|E34_1055|41450_45292|1281aa																												DNA-binding protein
OG_5679	SexF																				c11|E34_1054|40789_41331|181aa																												hypothetical protein
OG_5678	SexF																				c11|E34_1053|39551_40780|410aa																												hypothetical protein
OG_5288	SexF																				c11|E34_1052|39173_39442|90aa																c10|LMG9447_2610|59423_59947|175aa												hypothetical protein
OG_5677	SexF																				c11|E34_1051|38710_38832|41aa																												hypothetical protein
OG_5676	SexF																				c11|E34_1050|38286_38675|130aa																												hypothetical protein
OG_5682	SexF																				c11|E34_1049|35028_37832|935aa																												USG protein
OG_5683	SexF																				c11|E34_1048|34172_34732|187aa																												hypothetical protein
OG_4944	SexF																				c11|E34_1047|33507_33944|146aa																												Transcriptional regulator, MerR family
OG_4379	SexF																				c11|E34_1046|32980_33468|163aa																												Maltose O-acetyltransferase (EC 2.3.1.79)
OG_4380	SexF																				c11|E34_1045|32142_32885|248aa																												Short-chain dehydrogenase/reductase SDR
OG_2894	SexF		c265|FG2_2394|242_664|141aa		c201|LMG6897_0378|630_1052|141aa	gi|UC5099_2421|10270_10932|221aa gi|UC5099_2542|48691_49443|251aa							c99|N41_1270|708_1460|251aa							c146|DRA4_1949|234_695|154aa c153|DRA4_1596|306_431|42aa					c24|KF201_2253|4532_4657|42aa																c118|UC317_1280|235_360|42aa			gi|IO1_1181|1216680_1217477|266aa					hypothetical protein
OG_4172	SexF																												c23|K337_1789|16409_16861|151aa	c19|KF67_0716|36974_37426|151aa			c115|LMG14418_1205|3735_4187|151aa											gi|IO1_1182|1217692_1218144|151aa					hypothetical protein
OG_27	SexF	c193|B40_1210|584_1324|247aa	c216|FG2_2186|21_761|247aa	c207|HP_0787|21_761|247aa	c187|LMG6897_1905|21_761|247aa	gi|UC5099_0567|537436_538254|273aa gi|UC5099_0588|564848_565666|273aa gi|UC5099_0670|629364_630182|273aa gi|UC5099_2390|18115_18843|243aa gi|UC5099_0854|796941_797675|245aa gi|UC5099_2200|2068974_2069708|245aa	c169|AM2_0349|7_825|273aa	c9|SK110_1629|39328_40008|227aa c170|SK110_2160|56_742|229aa	gi|SK11_0412|387274_388092|273aa gi|SK11_0646|604402_605223|274aa gi|SK11_0875|822602_823420|273aa gi|SK11_1035|977115_977936|274aa gi|SK11_1089|1025654_1026475|274aa gi|SK11_2702|38405_39223|273aa gi|SK11_2439|2243338_2244078|247aa gi|SK11_1701|1578493_1579179|229aa gi|SK11_2719|57358_57573|72aa	gi|A76_0049|54093_54911|273aa gi|A76_0432|415118_415936|273aa gi|A76_0595|567626_568444|273aa gi|A76_0906|858411_859229|273aa gi|A76_1078|1010319_1011137|273aa gi|A76_1554|1444122_1444943|274aa gi|A76_1713|1596663_1597481|273aa gi|A76_1735|1620594_1621412|273aa gi|A76_2743|38176_38994|273aa gi|A76_0081|83463_84326|288aa gi|A76_2454|2252555_2253289|245aa			c109|N41_0179|57_875|273aa		c98|NCDO763_2025|112_795|228aa	gi|MG1363_1016|946478_947218|247aa gi|MG1363_1278|1201777_1202517|247aa gi|MG1363_0632|600336_600959|208aa				c5|DRA4_1690|611_1429|273aa			c3|KF146_1381|152004_152678|225aa						c23|K337_1790|16970_17644|225aa	c8|KF67_0089|78574_79248|225aa			c2|LMG14418_1304|115_933|273aa c115|LMG14418_1204|2952_3626|225aa	c112|LMG8520_1481|157_369|71aa			c164|LMG9447_0144|56_271|72aa		c195|ML8_2241|19_282|88aa	c38|N42_1611|4968_5786|273aa	c114|UC317_2333|611_1429|273aa	gi|KLDS_0140|135967_136782|272aa gi|KLDS_1597|1586513_1587331|273aa gi|KLDS_0081|82477_82854|126aa	gi|IL1403_0158|139171_139989|273aa gi|IL1403_0411|374892_375710|273aa gi|IL1403_0686|627782_628600|273aa gi|IL1403_0887|837114_837932|273aa gi|IL1403_2252|2155831_2156649|273aa gi|IL1403_2323|2216165_2216983|273aa gi|IL1403_0058|53161_53844|228aa	gi|IO1_1183|1218253_1219029|259aa	gi|CV56_0601|560802_561620|273aa				Mobile element protein
OG_76	SexF	c202|B40_1557|248_427|60aa	c236|FG2_2171|208_387|60aa	c224|HP_1462|208_387|60aa	c204|LMG6897_0282|208_387|60aa	gi|UC5099_0500|483734_484291|186aa gi|UC5099_0566|536882_537439|186aa gi|UC5099_0589|565663_566220|186aa gi|UC5099_0397|387410_387781|124aa gi|UC5099_0669|628996_629367|124aa gi|UC5099_2391|18930_19301|124aa	c169|AM2_0350|822_1001|60aa	c174|SK110_1910|227_406|60aa	gi|SK11_0645|603848_604405|186aa gi|SK11_0874|822048_822605|186aa gi|SK11_1034|976561_977118|186aa gi|SK11_1088|1025100_1025657|186aa gi|SK11_1699|1577805_1578362|186aa gi|SK11_2703|39220_39591|124aa gi|SK11_2717|56387_56758|124aa	gi|A76_0050|54908_55465|186aa gi|A76_1736|1621409_1621966|186aa gi|A76_0433|415933_416490|186aa gi|A76_0594|567072_567629|186aa gi|A76_1714|1597478_1598035|186aa gi|A76_1079|1011134_1011505|124aa gi|A76_1555|1444940_1445311|124aa gi|A76_1963|1828739_1829110|124aa gi|A76_0109|110757_111044|96aa			c109|N41_0180|872_1051|60aa		c98|NCDO763_2026|927_1484|186aa	gi|MG1363_0630|599583_600140|186aa				c5|DRA4_1689|57_614|186aa*	c11|E34_1044|31423_31719|99aa		c3|KF146_1382|152810_153376|189aa c35|KF146_1221|79_531|151aa		c6|KF201_1789|9254_9508|85aa				c23|K337_1791|17776_18351|192aa	c8|KF67_0088|77876_78442|189aa			c2|LMG14418_1305|930_1487|186aa c115|LMG14418_1203|2245_2820|192aa				c111|LMG9447_0492|550_1107|186aa c107|LMG9447_0349|789_1241|151aa c83|LMG9447_2189|2114_2401|96aa	c55|M20_0676|7486_7758|91aa	c146|ML8_1188|458_1015|186aa	c38|N42_1612|5783_6340|186aa	c114|UC317_2332|57_614|186aa	gi|KLDS_1598|1587328_1587885|186aa	gi|IL1403_0157|138617_139174|186aa gi|IL1403_0410|374338_374895|186aa gi|IL1403_0888|837929_838486|186aa gi|IL1403_2253|2156646_2157203|186aa gi|IL1403_2324|2216980_2217537|186aa gi|IL1403_0687|628597_629154|186aa gi|IL1403_0057|52656_53027|124aa	gi|IO1_1184|1219059_1219634|192aa	gi|CV56_0602|561617_562174|186aa	gi|KF147_2316|2315964_2316416|151aa			Mobile element protein
OG_4568	SexF																												c23|K337_1792|18758_19615|286aa						c12|LMG8526_2307|5007_5867|287aa									gi|IO1_1185|1220040_1220897|286aa					hypothetical protein
OG_5236	SexF																												c23|K337_1793|19612_20094|161aa															gi|IO1_1186|1220894_1221376|161aa					hypothetical protein
OG_7205	SexF																																											gi|IO1_1187|1221366_1223042|559aa					hypothetical protein
OG_7203	SexF																																											gi|IO1_1188|1223055_1224077|341aa					hypothetical protein
OG_7204	SexF																																											gi|IO1_1189|1224245_1224445|67aa					hypothetical protein
OG_4567	SexF																																											gi|IO1_1190|1224823_1225971|383aa					Type I restriction-modification system,specificity subunit S (EC 3.1.21.3)
OG_1896	SexF		c131|FG2_0428|785_1909|375aa	c76|HP_1036|1338_2462|375aa	c71|LMG6897_1596|1474_2598|375aa		c56|AM2_2514|3754_4878|375aa		gi|SK11_1100|1036757_1037881|375aa	gi|A76_0515|496261_497073|271aa gi|A76_0514|495939_496097|53aa			c9|N41_1680|64124_64897|258aa		c13|NCDO763_1580|34123_35139|339aa	gi|MG1363_0613|583444_584460|339aa	c0|P7266_0370|69733_70887|385aa		c2|ATCC19435_1486|166173_167297|375aa c0|ATCC19435_1154|280960_281187|76aa c0|ATCC19435_1155|281306_282097|264aa	c9|DRA4_1562|71585_72109|175aa			c5|KF146_2192|111343_112428|362aa					c134|KF24_0658|105_620|172aa c133|KF24_0853|80_595|172aa	c31|K337_1734|740_1669|310aa				c15|LMG14418_0598|3117_4250|378aa	c9|LMG8520_1675|72127_72948|274aa			c4|LMG9447_0707|11370_12494|375aa c28|LMG9447_2494|11651_12793|381aa		c48|ML8_2233|9457_10191|245aa c48|ML8_2232|9067_9192|42aa	c1|N42_0373|221048_222181|378aa			gi|IL1403_0478|447236_448369|378aa gi|IL1403_1088|1036642_1037766|375aa	gi|IO1_1191|1226058_1226987|310aa	gi|CV56_1046|1019818_1020942|375aa	gi|KF147_1068|1066254_1067378|375aa			Phage integrase
OG_63	SexF					gi|UC5099_0493|477655_478275|207aa							c60|N41_2554|112_879|256aa		c54|NCDO763_2015|5391_6638|416aa	gi|MG1363_0683|655647_656894|416aa				c54|DRA4_1959|175_1416|414aa						c17|KF282_0971|23786_24961|392aa				c37|KF67_0971|2642_3853|404aa			c24|LMG14418_1858|13677_14804|376aa			c23|LMG9446_1183|6606_7841|412aa	c16|LMG9447_2085|29995_31212|406aa		c46|ML8_1373|3274_4434|387aa	c29|N42_1336|9188_10411|408aa		gi|KLDS_1452|1440326_1441453|376aa	gi|IL1403_0701|645351_646574|408aa	gi|IO1_1192|1227021_1228271|417aa	gi|CV56_2520|6798_7991|398aa				Type I restriction-modification system,specificity subunit S (EC 3.1.21.3)
OG_1730	SexF	c94|B40_2266|637_2184|516aa	c117|FG2_0666|1339_2934|532aa	c126|HP_0442|2667_4262|532aa		gi|UC5099_0492|476111_477658|516aa						gi|KW2_1478|1569817_1571367|517aa	c55|N41_0708|3803_5398|532aa		c54|NCDO763_2014|3803_5422|540aa	gi|MG1363_0682|654059_655678|540aa				c54|DRA4_1960|1413_2960|516aa						c17|KF282_0972|24958_26505|516aa				c37|KF67_0972|3850_5397|516aa			c24|LMG14418_1856|11101_12411|437aa			c23|LMG9446_1182|5018_6613|532aa	c16|LMG9447_2084|28451_29998|516aa		c46|ML8_1374|4427_6022|532aa	c29|N42_1337|10404_11999|532aa	c44|UC317_0584|8351_9946|532aa	gi|KLDS_1454|1442719_1443228|170aa	gi|IL1403_0700|643807_645354|516aa	gi|IO1_1193|1228273_1229856|528aa	gi|CV56_2519|5210_6805|532aa				Type I restriction-modification system,DNA-methyltransferase subunit M (EC 2.1.1.72)
OG_1729	SexF	c94|B40_2267|2224_5211|996aa	c117|FG2_0667|2934_6011|1026aa	c126|HP_0441|67_2667|867aa		gi|UC5099_0491|473405_476071|889aa						gi|KW2_1472|1560360_1563458|1033aa	c55|N41_0707|450_3803|1118aa		c54|NCDO763_2013|627_3803|1059aa	gi|MG1363_0681|650883_654059|1059aa				c54|DRA4_1961|3000_5987|996aa						c17|KF282_0973|26545_29532|996aa				c37|KF67_0973|5437_8424|996aa			c24|LMG14418_1859|14822_17911|1030aa			c23|LMG9446_1181|1941_5018|1026aa	c16|LMG9447_2083|25424_28411|996aa		c46|ML8_1375|6022_9099|1026aa	c29|N42_1338|11999_15076|1026aa	c44|UC317_0583|5274_8351|1026aa	gi|KLDS_1451|1437219_1440308|1030aa	gi|IL1403_0699|640780_643767|996aa	gi|IO1_1194|1229856_1232927|1024aa	gi|CV56_2518|2133_5210|1026aa				Type I restriction-modification system,restriction subunit R (EC 3.1.21.3)
OG_2944	SexF																		c1|ATCC19435_0251|131005_140511|3169aa						c19|KF201_0741|17706_20552|949aa	c35|KF282_0944|4255_4383|43aa	c20|K231_0142|16410_17948|513aa		c6|K337_1922|122479_127320|1614aa	c12|KF67_2477|6110_14278|2723aa							c10|LMG9447_2599|39013_46968|2652aa	c93|M20_0418|8_262|85aa		c2|N42_1493|93178_102684|3169aa		gi|KLDS_1273|1232113_1241631|3173aa		gi|IO1_1195|1233472_1235604|711aa					DNA methylase
OG_4569	SexF																												c6|K337_1921|121464_122270|269aa															gi|IO1_1196|1235733_1237007|425aa	gi|CV56_0024|24112_25377|422aa				hypothetical protein
OG_5681	SexF																				c11|E34_1043|30844_31290|149aa																												hypothetical protein
OG_4929	SexF																				c11|E34_1042|29865_30716|284aa																												hypothetical protein
OG_103	SexF		c138|FG2_1118|282_1400|373aa	c106|HP_2426|2183_3301|373aa	c119|LMG6897_1466|282_1400|373aa	gi|UC5099_2483|48678_49598|307aa		c124|SK110_0647|1367_2071|235aa	gi|SK11_2687|21461_22165|235aa	gi|A76_2700|932_2071|380aa					c46|NCDO763_2448|1022_2137|372aa	gi|MG1363_1427|1344187_1345302|372aa			c1|ATCC19435_0247|127416_129092|559aa		c11|E34_1041|28274_29794|507aa							c35|KF24_1811|8506_10023|506aa		c19|KF67_0706|29060_30577|506aa					c12|LMG8526_2327|25824_27527|568aa	c20|LMG9446_0132|13314_14831|506aa	c16|LMG9447_2076|18111_19628|506aa	c34|M20_1220|11993_13696|568aa		c2|N42_1489|89589_91265|559aa		gi|KLDS_1279|1246565_1247692|376aa		gi|IO1_1197|1238052_1239572|507aa	gi|CV56_0004|3203_4720|506aa		mobD	MobD relaxase/mobilization nuclease domain containing protein	Relaxase
OG_2594	SexF		c120|FG2_1681|3240_3608|123aa				c177|AM2_0596|474_842|123aa	c160|SK110_1978|474_842|123aa	gi|SK11_2691|25476_25844|123aa					c60|V4_2519|1120_1452|111aa							c11|E34_1040|27891_28277|129aa		c16|KF146_2219|15579_15965|129aa		c19|KF201_0727|4438_4824|129aa			c16|KF24_1986|76_384|103aa			c32|KF7_2210|1097_1360|88aa	c36|Li1_0103|2072_2440|123aa					c10|LMG9447_2604|53892_54287|132aa	c32|M20_1268|4102_4488|129aa		c79|N42_2124|797_1129|111aa				gi|IO1_1198|1239569_1239955|129aa	gi|CV56_2514|42214_42582|123aa				hypothetical protein
OG_5287	SexF																				c11|E34_1039|27571_27714|48aa																			c79|N42_2125|1306_1425|40aa									hypothetical protein
OG_3305	SexF													c60|V4_2518|672_824|51aa							c11|E34_1038|26550_27596|349aa				c19|KF201_0725|3820_3948|43aa* c19|KF201_0726|3988_4140|51aa*		c23|K231_1745|12571_12816|82aa		c6|K337_1918|117506_117826|107aa								c66|LMG9447_0822|450_695|82aa							gi|IO1_1199|1240248_1241294|349aa					hypothetical protein
OG_1795	SexF														c46|NCDO763_2454|7088_8740|551aa	gi|MG1363_1433|1350253_1351905|551aa					c11|E34_1037|24557_26524|656aa													c66|LMG8520_0851|3434_5086|551aa	c12|LMG8526_2330|28694_30346|551aa			c34|M20_1216|8672_10324|551aa						gi|IO1_1200|1241320_1243287|656aa					hypothetical protein
OG_2771	SexF														c46|NCDO763_2457|11068_12138|357aa	gi|MG1363_1436|1354233_1355417|395aa			c1|ATCC19435_0256|145285_147462|726aa		c11|E34_1036|23287_24402|372aa							c16|KF24_1990|3777_4847|357aa						c66|LMG8520_0847|413_1009|199aa*	c12|LMG8526_2332|32177_33370|398aa		c10|LMG9447_2602|50671_53292|874aa	c34|M20_1213|6039_7223|395aa		c2|N42_1498|107458_109635|726aa		gi|KLDS_1268|1224960_1227137|726aa		gi|IO1_1201|1243442_1244557|372aa					LtrC-like protein
OG_5286	SexF																				c11|E34_1035|22091_23284|398aa																							gi|IO1_1202|1244560_1245753|398aa					hypothetical protein
OG_5285	SexF																				c11|E34_1034|20605_21978|458aa																							gi|IO1_1203|1245866_1247239|458aa					hypothetical protein
OG_5284	SexF																				c11|E34_1033|20327_20605|93aa																							gi|IO1_1204|1247242_1247517|92aa					hypothetical protein
OG_3217	SexF														c14|NCDO763_2523|43126_43818|231aa	gi|MG1363_1443|1360982_1361674|231aa			c1|ATCC19435_0267|157990_158679|230aa		c11|E34_1032|19732_20334|201aa														c12|LMG8526_2341|39475_40167|231aa					c2|N42_1509|120163_120852|230aa		gi|KLDS_1257|1213696_1214385|230aa		gi|IO1_1205|1247510_1248112|201aa					hypothetical protein
OG_3218	SexF														c14|NCDO763_2521|40161_42773|871aa	gi|MG1363_1445|1362027_1364639|871aa			c1|ATCC19435_0268|158697_161288|864aa		c11|E34_1031|17111_19762|884aa														c12|LMG8526_2342|40189_42801|871aa					c2|N42_1510|120870_123461|864aa		gi|KLDS_1256|1211087_1213678|864aa		gi|IO1_1206|1248125_1250674|850aa					Immunogenic secreted protein
OG_2389	SexF														c14|NCDO763_2520|37767_40157|797aa	gi|MG1363_1446|1364643_1367033|797aa			c1|ATCC19435_0269|161301_163577|759aa		c11|E34_1030|15271_17124|618aa*														c12|LMG8526_2343|42805_45051|749aa		c10|LMG9447_2593|31789_34065|759aa			c2|N42_1511|123474_125750|759aa		gi|KLDS_1255|1208701_1211076|792aa		gi|IO1_1207|1250721_1253138|806aa					FIG01115039: hypothetical protein
OG_5674	SexF																				c11|E34_1029|14707_15183|159aa*																												TrsE-like protein
OG_5283	SexF																				c11|E34_1028|13537_14388|284aa																							gi|IO1_1208|1253457_1254308|284aa					Tn5252, Orf23
OG_5282	SexF																				c11|E34_1027|13102_13476|125aa																							gi|IO1_1210|1254455_1254829|125aa					hypothetical protein
OG_2164	SexF	c43|B40_2059|6870_8501|544aa												c34|V4_2272|6830_7816|329aa*							c11|E34_1026|11226_13082|619aa			c17|KF196_1808|18327_19919|531aa				c16|KF24_1999|12642_14396|585aa		c19|KF67_0695|16963_18798|612aa		c21|Li1_2265|7771_9597|609aa				c18|LMG9446_1247|9572_11407|612aa		c32|M20_1282|16746_18500|585aa						gi|IO1_1211|1254849_1256705|619aa	gi|CV56_2497|25785_26966|394aa gi|CV56_2502|31591_32244|218aa				FIG00628985: hypothetical protein
OG_5281	SexF																				c11|E34_1025|10660_11229|190aa																							gi|IO1_1212|1256702_1257205|168aa					hypothetical protein
OG_4473	SexF																				c11|E34_1024|10337_10663|109aa																							gi|IO1_1213|1257391_1257594|68aa					hypothetical protein
OG_4343	SexF																				c11|E34_1023|5923_10134|1404aa																c10|LMG9447_2585|21916_26127|1404aa							gi|IO1_1214|1257797_1262008|1404aa					hypothetical protein
OG_3538	SexF																				c11|E34_1022|4660_5709|350aa							c16|KF24_2003|18578_19591|338aa		c12|KF67_2504|38380_39423|348aa					c12|LMG8526_2352|52004_53044|347aa		c10|LMG9447_2584|20642_21703|354aa							gi|IO1_1215|1262220_1263275|352aa					Secreted antigen GbpB/SagA/PcsB, putativepeptidoglycan hydrolase
OG_5673	SexF																				c11|E34_1021|4460_4633|58aa																												hypothetical protein
OG_3478	SexF														c14|NCDO763_2511|29334_29696|121aa	gi|MG1363_1454|1375104_1375466|121aa					c11|E34_1020|3800_4162|121aa													c84|LMG8520_0689|1060_1377|106aa	c12|LMG8526_2354|53774_54136|121aa									gi|IO1_1216|1263775_1264137|121aa					hypothetical protein
OG_1880	SexF	c114|B40_1288|1652_2461|270aa	c121|FG2_2097|3821_4630|270aa	c158|HP_0973|1431_2240|270aa	c148|LMG6897_0858|1431_2240|270aa	gi|UC5099_2524|29866_30675|270aa	c98|AM2_2096|1654_2463|270aa	c97|SK110_0652|2906_3715|270aa	gi|SK11_2644|26730_27539|270aa	gi|A76_2647|1525_2334|270aa									c40|ATCC19435_1505|1396_2205|270aa	c55|DRA4_0637|1786_2595|270aa	c11|E34_1019|2342_3211|290aa		c16|KF146_2224|20314_21123|270aa				c20|K231_0143|17962_18435|158aa*	c16|KF24_2008|21353_22222|290aa		c19|KF67_0710|32865_33674|270aa				c68|LMG8520_2679|4718_5527|270aa		c20|LMG9446_0129|10344_11153|270aa		c48|M20_2097|6721_7503|261aa	c68|ML8_1436|4690_5499|270aa	c45|N42_1350|4673_5482|270aa	c68|UC317_2564|2802_3611|270aa			gi|IO1_1217|1264717_1265586|290aa					chr (plasmid) partitioning protein ParA/ Sporulation initiation inhibitor protein Soj
OG_3353	SexF																				c11|E34_1018|1918_2349|144aa							c16|KF24_2009|22215_22670|152aa																gi|IO1_1218|1265579_1266013|145aa					hypothetical protein
OG_3903	SexF																				c11|E34_1017|885_1667|261aa							c16|KF24_2010|22922_23713|264aa									c10|LMG9447_2573|13200_13994|265aa							gi|IO1_1219|1266265_1267056|264aa					Phage replication initiation protein
OG_4977	SexF																												c0|K337_1420|15573_15689|39aa															gi|IO1_1220|1267695_1267841|49aa*					FIG00755034: hypothetical protein
OG_7174	SexF																																											gi|IO1_1221|1267924_1268502|193aa					Tyrosine recombinase xerC
OG_2350	SexF	c7|B40_2420|35755_36672|306aa	c144|FG2_2514|3029_3508|160aa*c144|FG2_2513|2592_2981|130aa*	c130|HP_2277|3016_3510|165aa*c130|HP_2276|2594_2983|130aa*	c124|LMG6897_1682|3029_3508|160aa*c124|LMG6897_1681|2592_2981|130aa*		c39|AM2_2547|17851_18768|306aa	c40|SK110_1477|17851_18768|306aa	gi|SK11_1305|1206407_1207324|306aa	gi|A76_1309|1212770_1213687|306aa	c3|KW10_1194|41403_42002|200aa*c3|KW10_1195|42013_42321|103aa*	gi|KW2_1189|1254269_1255186|306aa		c4|V4_1549|45082_45999|306aa							c47|E34_2274|26_205|60aa*				c19|KF201_0723|2529_3443|305aa				c6|K337_1916|116203_117117|305aa															gi|IO1_1222|1269146_1270060|305aa					Nucleoside-diphosphate-sugar epimerases
OG_2145	SexF	c7|B40_2421|36821_37348|176aa	c144|FG2_2512|1916_2443|176aa	c130|HP_2275|1918_2445|176aa	c124|LMG6897_1680|1916_2443|176aa		c39|AM2_2548|18917_19444|176aa	c40|SK110_1478|18917_19444|176aa	gi|SK11_1304|1205731_1206258|176aa	gi|A76_1308|1212094_1212621|176aa	c3|KW10_1196|42321_42998|226aa	gi|KW2_1190|1255186_1255863|226aa		c4|V4_1550|45999_46676|226aa			c11|P7266_1815|33022_33696|225aa				c23|E34_1750|810_1223|138aa	c10|KF134_2284|69002_69691|230aa	c13|KF146_1037|53843_54532|230aa	c11|KF196_1067|53844_54533|230aa	c19|KF201_0722|1851_2528|226aa	c11|KF282_1735|26078_26767|230aa			c6|K337_1915|115525_116202|226aa	c15|KF67_1410|52140_52829|230aa														gi|IO1_1223|1270061_1270738|226aa					ThiJ/PfpI family protein
