# Supplementary material
Source: Frontiers journal article supplement (https://www.frontiersin.org/articles/432974)
Supplement: Data_Sheet_1.ZIP [file Wels et al._Supplementary Material.pdf › Wels et al._Supplementary Material.pdf]

## ***Supplementary Material***

### **Comparative genome analysis of *Lactococcus lactis* indicates niche adaptation and resolves genotype/phenotype disparity**

Michiel Wels<sup>1,2</sup>, Roland Siezen<sup>2,3,4</sup>, Sacha van Hijum<sup>1,2,3</sup>, William J. Kelly<sup>5</sup>, Herwig Bachmann<sup>1,2,6\*</sup>

<sup>1</sup> NIZO B.V., Ede, The Netherlands

<sup>2</sup> TI Food and Nutrition, Wageningen, The Netherlands

<sup>3</sup> Centre for Molecular and Biomolecular Informatics, Radboud Institute for Molecular Life Sciences,

Radboud UMC, Nijmegen, The Netherlands.

<sup>4</sup> Microbial Bioinformatics, Ede, The Netherlands.

<sup>5</sup> Ashhurst, New Zealand

<sup>6</sup> Systems Bioinformatics, VU University, Amsterdam, The Netherlands

\*Correspondence: Herwig Bachmann, NIZO B.V., P.O. Box 20, 6710BA Ede, The Netherlands; M: +31 318 659652; E: [Herwig.Bachmann@nizo.com](mailto:Herwig.Bachmann@nizo.com)

---

## Supplemental Figures

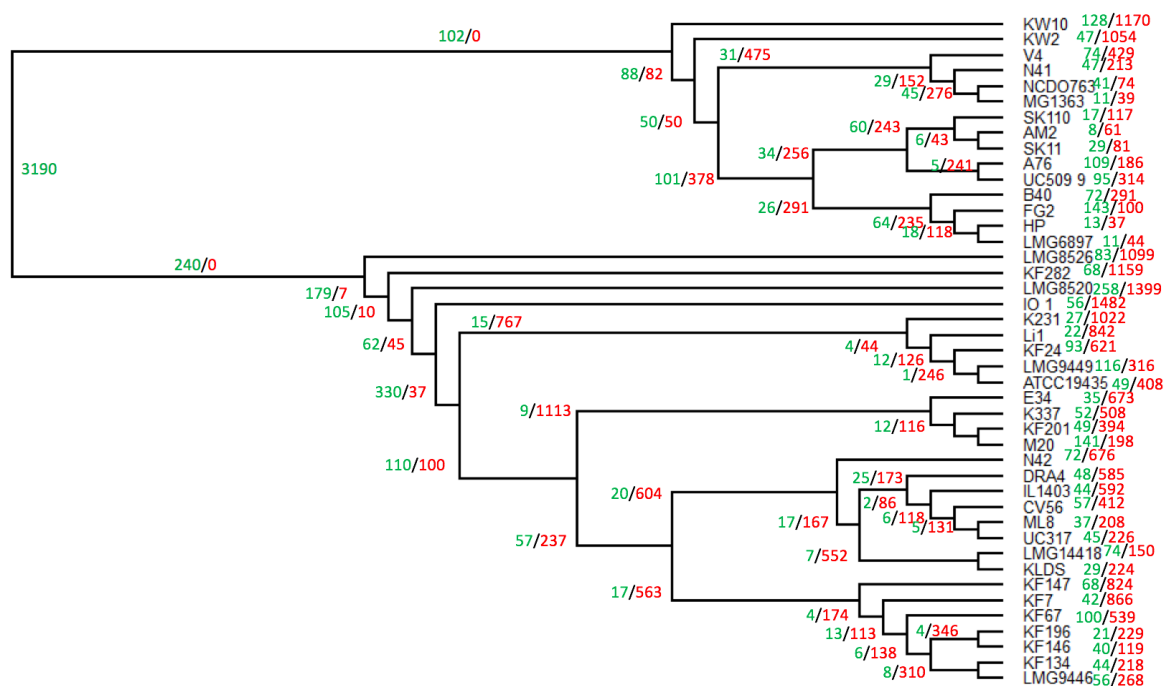

Supplementary Figure 1: Phylogenetic tree based on the single nucleotide polymorphisms (SNPs) in the *L. lactis* core genes. Gene gain and gene loss at the individual nodes are given in green and red respectively.

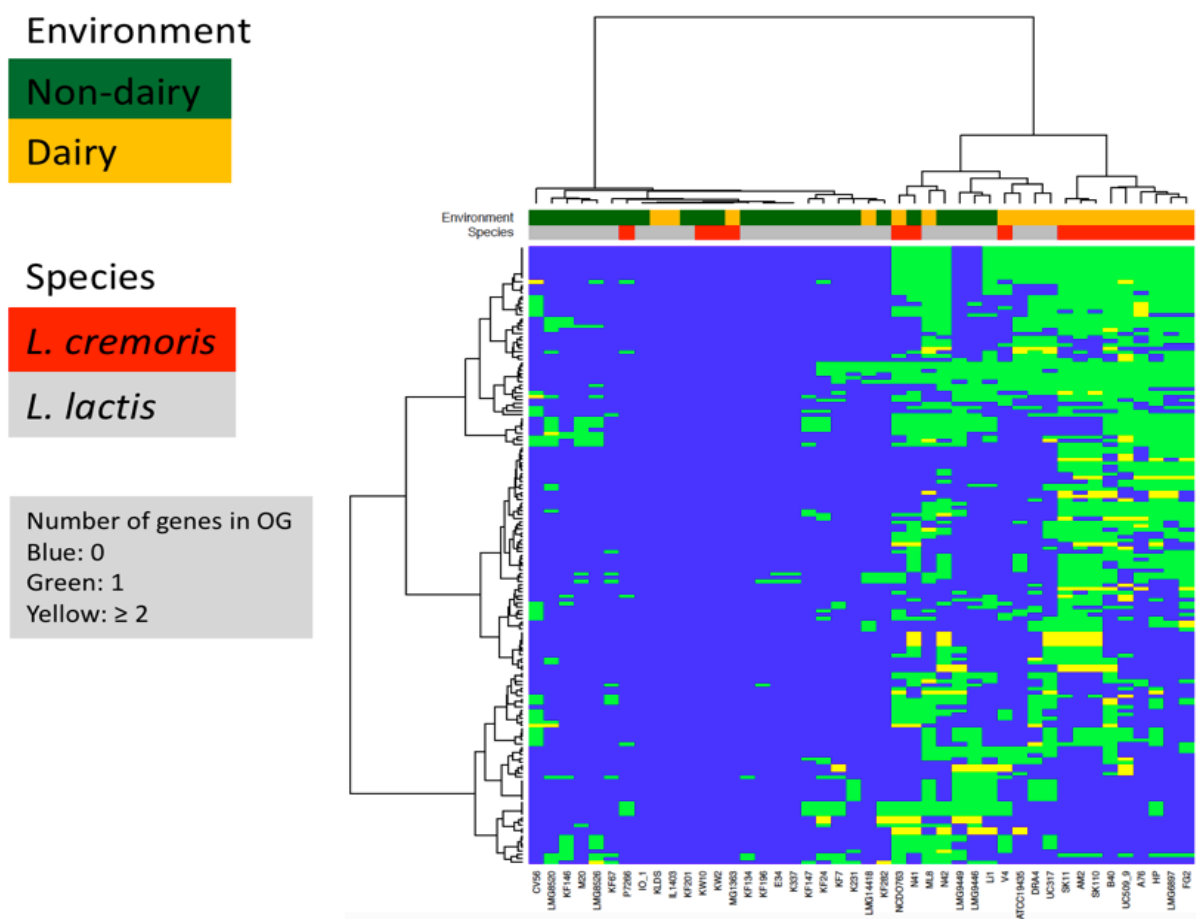

Supplementary Figure 2: Heatmap of orthologous groups (left dendrogram) identified as plasmid encoded genes. Isolation environment and species information are indicated at the top of the figure (LMG8520 is the type strain *L. lactis* ssp. *hordniae*). Each row represents one OG. Each column represents one strain. For details see Supplementary Table 1/Sheet 5.

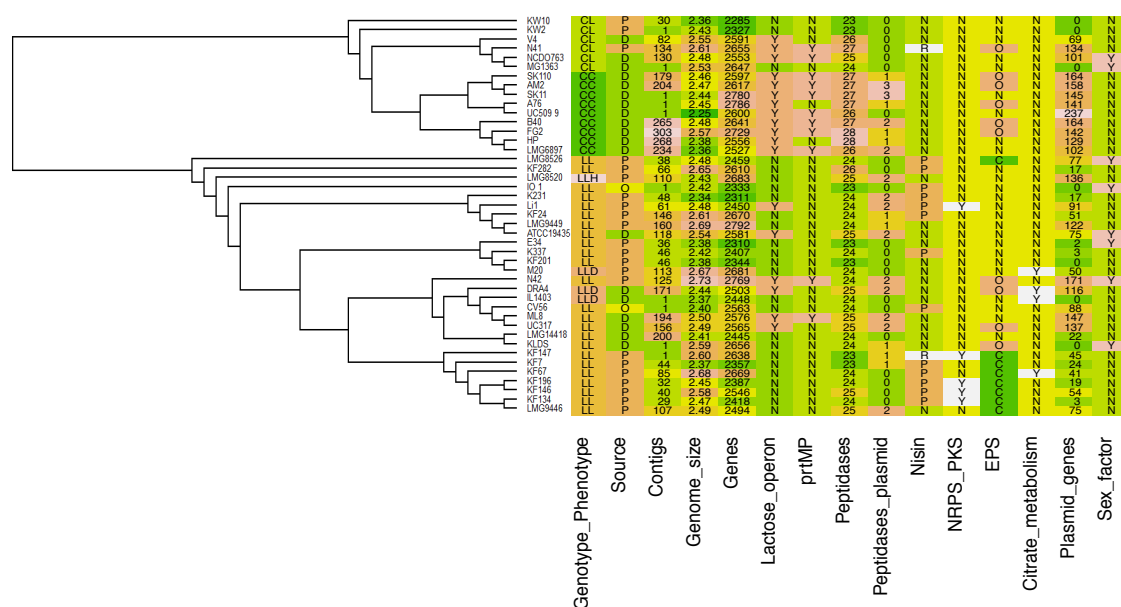

Supplementary Figure 3: Phylogenetic tree and its relation to a selected set of phenotypic properties. Abbreviations: Genotype-Phenotype CL=*cremoris-lactis*, CC=*cremoris-cremoris*, LL= *lactis-lactis*, LLH=*lactis-lactis-hordniae*, LLD=*lactis-lactis-diacetylactis*; Source D=dairy, P=plant material, O=other; Nisin P=producer, R=resistant, N=contains no genes from the nisin cluster; EPS C=conserved on chromosome, O=other position on chromosome or plasmid-located, N= contains no EPS genes; in all other columns y=yes/present, n=none/absent. The branch of the dendrogram on the length does not reflect the phylogenetic distance (see Figure 2 for phylogenetic distance). Colors are only for easier visualization of differences within columns.

```

-SqbB: MNEFKKIGLENEFNLI-EDTEQLE-LMSGAGWTGVAKSITSCSLLSIGLGNDGWVCTWTAECQATCR
-LlbB: MKNLKNSGLQEDYLSLI-EETKDLE-LISGAGWGGVAKSITSCSILSITLGNNGWICTWTAECQKCCK
-SmbB: MKEIQKAGLQEE-LSILMDDANNLEQLTAGIG-TTVVNS-----TFSIVLGNKGYICTVTVECMRNCSK

-SqbA: MEHNNLLINISEEEMQKNMVLLIEDEDQELSGASTPGCAWAAVSAISTVSALFQITTACCTTRCYHP
-LlbA: MKNNNLLDVTDEVMKKNIVTLIEDEDLNI SGAGTPA-GITVV---ITIGLLQVTTACTSRCWHP
-SmbA: MKSNLLKINNVTEMEKNMVTLLIKDEDEMELAGGSTPACCAIGVV---GITVAVTGISETACTSRCINK

```

Supplementary Figure 4: Sequence alignment of the lantibiotic precursors A and B of *L. lactis* (Ll), *S. mutans* (Sm), and *S. gallolyticus*. Identical residues are colored green, while Cys residues probably involved in cyclization are colored yellow.

## A. SecA2 system

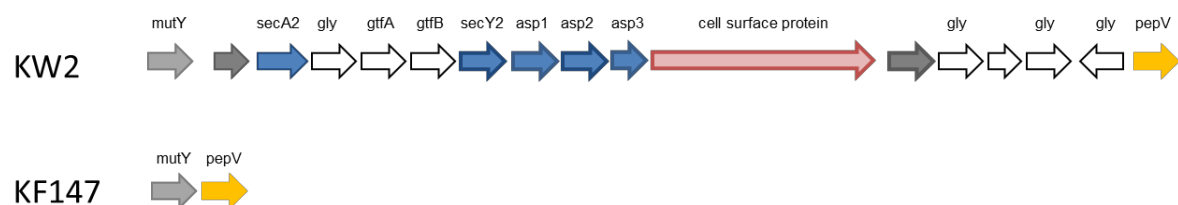

## B. ESX system

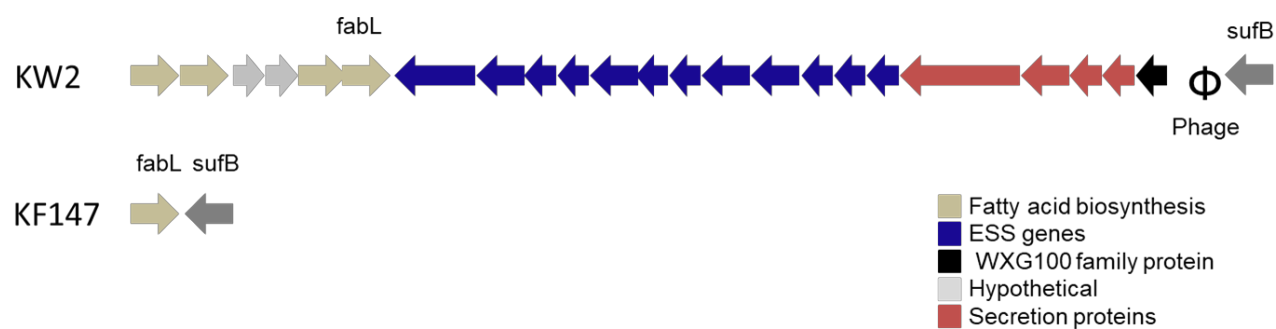

Supplementary Figure 5: Accessory protein secretion systems found in *Lactococcus lactis* subsp. *cremoris* KW2 (Panel A) and ESX system (Panel B).

## Supplementary Tables

(if only legends are given the Tables are supplied as separate Excel files)

Supplementary Table 1: OG tables including all analyzed OGs (Sheet 1), subspecies specific OGs that only occur in either *ssp. lactis* or *ssp. cremoris* (Sheet 2) and detailed lists of OGs given in the heatmaps of Figure 3 (Sheet 3), Figure 4 (Sheet 4) and Supplementary Figure 2 (Sheet 5). See Excel file.

The alignments of all OGs are deposited at zenodo.com under DOI: 10.5281/zenodo.1471674

<https://doi.org/10.5281/zenodo.1471674>

Supplementary Table 2: Pseudogenes occurring in more than 8 out of 43 strains (Sheet1) and an overrepresentation analysis (Sheet 2). See Excel file.

Supplementary Table 3: Glycoside hydrolase gene cluster found in *L. lactis* strains.

+ gene present; - pseudogene; no-symbol gene absent;

| Glycosylhydrolase<br>OG | GH115<br>OG_2205 | GH1<br>OG_34 | GH85,<br>CBM32<br>OG_1824 | GH13<br>OG_24 | GH20<br>OG_1863 | GH38<br>OG_1884 | GH125<br>OG_1883 | GH92<br>OG_1881 | GH43<br>OG_3849 | GH43<br>OG_871 | GH11<br>OG_2465 |
|-------------------------|------------------|--------------|---------------------------|---------------|-----------------|-----------------|------------------|-----------------|-----------------|----------------|-----------------|
| <b>ssp. cremoris</b>    |                  |              |                           |               |                 |                 |                  |                 |                 |                |                 |
| KW2                     | -                | +            | -                         | +             | +               | +               | +                | +               |                 | +              | +               |
| KW10                    | +                | +            | +                         | +             | +               | +               | +                | +               |                 | +              | +               |
| V4                      | +                | +            | +                         | +             | +               | +               | +                | +               |                 | +              | +               |
| N41                     | -                | +            | +                         | +             | -               | -               | +                | +               | -               | +              | +               |
| MG1363                  | -                | -            |                           |               |                 |                 |                  |                 |                 |                |                 |
| NCDO763                 | -                | -            |                           |               |                 |                 |                  |                 |                 |                |                 |
| A76                     | +                | +            |                           |               |                 |                 |                  |                 |                 |                | +               |
| UC509.9                 | +                |              |                           |               |                 |                 |                  |                 |                 |                | -               |
| SK11                    | -                | +            |                           |               |                 |                 |                  |                 |                 |                | +               |
| SK110                   | -                | +            |                           |               |                 |                 |                  |                 |                 |                | +               |
| AM2                     | -                | +            |                           |               |                 |                 |                  |                 |                 |                | +               |
| B40                     | +                |              |                           |               |                 |                 |                  |                 |                 |                | -               |
| HP                      | +                |              |                           |               |                 |                 |                  |                 |                 |                | +               |
| FG2                     | +                |              |                           |               |                 |                 |                  |                 |                 |                | -               |
| LMG6897                 | +                |              |                           |               |                 |                 |                  |                 |                 |                | +               |
| <b>ssp. lactis</b>      |                  |              |                           |               |                 |                 |                  |                 |                 |                |                 |
| KF147                   | +                | +            | +                         | +             | +               | +               | +                | +               | +               | +              |                 |
| M20                     |                  | +            | +                         | +             | +               | +               | +                | +               |                 | +              |                 |
| KF201                   |                  | +            | +                         | +             | -               | +               | +                | +               |                 | +              |                 |
| K337                    | +                | +            |                           | +             | -               | +               | +                | +               |                 | +              |                 |
| KF67                    |                  | +            | +                         | +             | +               | +               | +                | +               |                 | +              |                 |
| KF134                   |                  | +            | +                         | +             | +               | +               | +                | +               |                 | +              |                 |
| KF146                   |                  | +            | +                         | +             | +               | +               | +                | +               |                 | +              |                 |
| KF196                   |                  | +            | +                         | +             | +               | +               | +                | +               |                 | +              |                 |
| E34                     |                  | +            | +                         | +             | +               | +               | +                | +               |                 | +              |                 |
| KF7                     |                  | +            | -                         | +             | +               | +               | +                | +               |                 | +              |                 |
| LMG9446                 |                  | +            | +                         | +             | -               | +               | +                | +               |                 | +              |                 |
| LMG8526                 |                  | +            | +                         | +             | +               | +               | +                | +               | +               | +              |                 |
| KF282                   | +                | +            | +                         | +             | +               | +               | +                | +               | +               | +              |                 |
| LMG8520                 |                  | +            | -                         | -             | -               | +               | -                | +               |                 | -              |                 |
| N42                     |                  | +            | +                         | +             | +               | +               | +                | +               |                 | +              |                 |
| ATCC19435               |                  | +            | +                         | +             | +               | +               | +                | +               |                 | +              |                 |
| K231                    |                  | +            | +                         | +             | +               | +               | +                | +               |                 | +              |                 |
| Li-1                    |                  | +            | +                         | +             | +               | +               | +                | +               |                 | +              |                 |
| IO-1                    |                  | +            | +                         | +             | +               | +               | +                | +               |                 | +              |                 |
| KF24                    |                  | +            | +                         | +             | +               | +               | +                | +               |                 | +              |                 |
| LMG9447                 |                  | +            | +                         | +             | -               | +               | +                | +               |                 | +              |                 |
| UC317                   |                  | +            | +                         | +             | +               | +               | +                | +               |                 | +              |                 |
| ML8                     |                  | +            | +                         | +             | +               | +               | +                | +               |                 | +              |                 |
| CV56                    |                  | +            | +                         | +             | +               | +               | +                | +               |                 | +              |                 |
| IL1403                  |                  | +            |                           | +             | +               | +               | +                | +               |                 | +              |                 |
| DRA4                    |                  | +            |                           | +             | +               | +               | +                | +               |                 | +              |                 |
| LMG14418                |                  | +            |                           | +             | +               | +               | +                | +               |                 | +              |                 |



Supplementary Table 4: Genes involved in acid stress. Symbols: +, intact gene; -, gene missing; P, pseudogene; T/+, transposase inserted adjacent to intact gene; P/T, transposase inserted adjacent to a pseudogene.

| OG                             |         | KW2      | KW10 | V4 | N41 | NCD0763 | MG1363 | AM2 | SK11     | SK110 | A76 | UC509.9 | B40 | FG2 | HP | LMG6897 |
|--------------------------------|---------|----------|------|----|-----|---------|--------|-----|----------|-------|-----|---------|-----|-----|----|---------|
| Genotype                       |         | cremoris |      |    |     |         |        |     | cremoris |       |     |         |     |     |    |         |
| Phenotype                      |         | lactis   |      |    |     |         |        |     | cremoris |       |     |         |     |     |    |         |
| Arginine deiminase system      |         |          |      |    |     |         |        |     |          |       |     |         |     |     |    |         |
| argR                           | OG_1521 | +        | +    | +  | +   | +       | +      | +   | +        | +     | +   | +       | +   | +   | +  | +       |
| argS                           | OG_1099 | +        | +    | +  | +   | +       | +      | +   | +        | +     | +   | T/+     | +   | +   | +  | +       |
| arcA                           | OG_1100 | +        | +    | +  | +   | +       | +      | P   | P        | P     | +   | +       | P   | P   | P  | P       |
| arcB                           | OG_1101 | +        | +    | +  | +   | +       | +      | +   | +        | +     | +   | +       | +   | +   | +  | +       |
| arcD1                          | OG_11   | +        | +    | +  | +   | +       | +      | +   | +        | +     | +   | +       | P   | P   | P  | P       |
| arcC1                          | OG_1761 | +        | +    | +  | +   | +       | +      | +   | +        | +     | +   | +       | P   | P   | P  | P       |
| arcC2                          | OG_1522 | +        | +    | +  | +   | +       | +      | +   | +        | +     | +   | +       | +   | +   | +  | +       |
| arcT                           | OG_162  | +        | +    | +  | +   | +       | +      | +   | +        | +     | P/T | +       | +   | +   | +  | +       |
| arcD2                          | OG_11   | +        | +    | +  | +   | +       | +      | +   | +        | +     | +   | +       | +   | +   | +  | +       |
| Agmatine deiminase system      |         |          |      |    |     |         |        |     |          |       |     |         |     |     |    |         |
| aguR                           | OG_1903 | +        | +    | +  | +   | -       | -      | -   | -        | -     | -   | -       | -   | -   | -  | -       |
| aguB                           | OG_1902 | +        | +    | +  | +   | -       | -      | -   | -        | -     | -   | -       | -   | -   | -  | -       |
| aguD                           | OG_1901 | +        | +    | +  | +   | -       | -      | -   | -        | -     | -   | -       | -   | -   | -  | -       |
| aguA                           | OG_1922 | +        | +    | +  | +   | -       | -      | -   | -        | -     | -   | -       | -   | -   | -  | -       |
| aguC                           | OG_1921 | +        | +    | +  | +   | -       | -      | -   | -        | -     | -   | -       | -   | -   | -  | -       |
| Glutamate decarboxylase system |         |          |      |    |     |         |        |     |          |       |     |         |     |     |    |         |
| gadB                           | OG_1672 | +        | -    | P  | +   | +       | +      | P   | P        | P     | P   | P       | P   | P   | P  | P       |
| gadC                           | OG_1701 | +        | -    | +  | +   | +       | +      | +   | +        | +     | +   | +       | +   | P   | P  | P       |
| gadR                           | OG_1614 | +        | -    | +  | +   | +       | +      | +   | +        | +     | +   | P       | +   | +   | +  | +       |
| Malolactic system              |         |          |      |    |     |         |        |     |          |       |     |         |     |     |    |         |
| mleR                           | OG_1447 | +        | +    | +  | P   | +       | +      | +   | +        | +     | P   | P       | +   | P   | P  | P       |
| mleS                           | OG_94   | +        | +    | +  | +   | +       | +      | P   | P        | P     | P   | +       | P   | P   | P  | P       |
| mleP                           | OG_944  | +        | +    | +  | +   | +       | +      | +   | +        | +     | P   | P       | +   | +   | +  | +       |

Supplementary Table 5: Occurrence of genes predicted to be involved in maltose and trehalose utilization in the genomes of *L. lactis* ssp *cremoris* strains. Symbols: +, intact gene; -, gene missing; P, pseudogene; (+) intact gene present but predicted protein has only ~60% amino acid identity to that from KW2.

|                                                                                            |             |         | KW2      | KW10 | V4 | N41 | NCDO763 | MG1363   | AM2 | SK11 | SK110 | A76 | UC509.9 | B40 | FG2 | HP | LMG6897 |
|--------------------------------------------------------------------------------------------|-------------|---------|----------|------|----|-----|---------|----------|-----|------|-------|-----|---------|-----|-----|----|---------|
| Function                                                                                   | Protein     | OG      |          |      |    |     |         |          |     |      |       |     |         |     |     |    |         |
| Genotype                                                                                   |             |         | cremoris |      |    |     |         | cremoris |     |      |       |     |         |     |     |    |         |
| Phenotype                                                                                  |             |         | lactis   |      |    |     |         | cremoris |     |      |       |     |         |     |     |    |         |
| Trehalose utilization                                                                      |             |         |          |      |    |     |         |          |     |      |       |     |         |     |     |    |         |
| Trehalose operon transcriptional repressor                                                 | GntR        | OG_989  | +        | +    | +  | +   | +       | +        | +   | +    | +     | +   | P       | +   | +   | +  | +       |
| PTS system, trehalose-specific IIA component(EC 2.7.1.69)                                  | PTS IIA     | OG_138  | +        | +    | +  | +   | +       | +        | +   | +    | +     | +   | P       | +   | P   | P  | P       |
| PTS system, trehalose-specific IIB component(EC 2.7.1.69) / PTS system, trehalose-specific | PTS IIBC    | OG_990  | +        | +    | +  | +   | +       | +        | +   | +    | +     | P   | +       | P   | +   | +  | +       |
| Trehalose 6-phosphate phosphorylase (EC2.4.1.216)                                          | GH65        | OG_1490 | +        | +    | +  | +   | +       | +        | +   | +    | +     | +   | +       | +   | +   | +  | +       |
| Beta-phosphoglucumutase (EC 5.4.2.6)                                                       | PGM         | OG_991  | +        | +    | +  | +   | +       | +        | +   | +    | +     | +   | +       | +   | +   | +  | +       |
| Maltose utilization (1)                                                                    |             |         |          |      |    |     |         |          |     |      |       |     |         |     |     |    |         |
| Maltose operon transcriptional repressor MalR, LacI family                                 | LacI        | OG_1364 | +        | +    | +  | +   | +       | +        | +   | +    | +     | +   | +       | +   | +   | +  | +       |
| Maltose phosphorylase (EC 2.4.1.8) / Trehalosephosphorylase (EC 2.4.1.64)                  | GH65        | OG_1365 | +        | +    | +  | +   | +       | +        | +   | +    | +     | +   | P       | P   | P   | P  | P       |
| Alpha-glucosidase (EC 3.2.1.20)                                                            | GH13        | OG_1753 | +        | +    | +  | +   | +       | +        | +   | +    | +     | P   | -       | -   | -   | -  | -       |
| Alpha-amylase (EC 3.2.1.1)                                                                 | GH13*       | OG_1768 | +        | +    | +  | +   | +       | +        | +   | +    | +     | P   | -       | -   | -   | -  | -       |
| Maltose O-acetyltransferase (EC 2.3.1.79)                                                  | MOAT        | OG_1754 | +        | +    | +  | +   | +       | +        | +   | +    | +     | +   | -       | -   | -   | -  | -       |
| Glucan 1,6-alpha-glucosidase (EC 3.2.1.70)                                                 | GH13        | OG_24   | +        | +    | +  | +   | +       | +        | +   | +    | +     | +   | -       | -   | -   | -  | -       |
| Neopullulanase (EC 3.2.1.135)                                                              | GH13        | OG_1755 | +        | +    | +  | +   | +       | +        | +   | +    | +     | +   | -       | -   | -   | -  | -       |
| Maltose/maltodextrin ABC transporter, substratebinding periplasmic protein MalE            | Maltose SBP | OG_1756 | +        | (+)  | +  | +   | +       | (+)      | (+) | (+)  | (+)   | (+) | -       | -   | -   | -  | -       |
| Maltose/maltodextrin ABC transporter, permeaseprotein MalF                                 | Maltose P   | OG_1757 | +        | (+)  | +  | +   | +       | (+)      | (+) | (+)  | (+)   | (+) | -       | -   | -   | -  | -       |
| Maltose/maltodextrin ABC transporter, permeaseprotein MalG                                 | Maltose P   | OG_1758 | +        | (+)  | +  | +   | +       | (+)      | (+) | (+)  | (+)   | P   | -       | -   | -   | -  | -       |
| Maltose utilization (2)                                                                    |             |         |          |      |    |     |         |          |     |      |       |     |         |     |     |    |         |
| Transcriptional regulator, LacI family                                                     | LacI        | OG_3122 | +        | +    | +  | +   | +       | -        | -   | -    | -     | -   | -       | -   | -   | -  | -       |
| membrane protein                                                                           | HP          | OG_3121 | +        | +    | +  | +   | +       | -        | -   | -    | -     | -   | -       | -   | -   | -  | -       |
| hypothetical protein                                                                       | HP          | OG_3120 | +        | +    | +  | +   | +       | -        | -   | -    | -     | -   | -       | -   | -   | -  | -       |
| Maltose phosphorylase (EC 2.4.1.8) / Trehalosephosphorylase (EC 2.4.1.64)                  | GH65        | OG_3119 | +        | +    | +  | +   | +       | -        | -   | -    | -     | -   | -       | -   | -   | -  | -       |
| Maltose/maltodextrin ABC transporter, substratebinding periplasmic protein MalE            | SBP         | OG_3118 | +        | +    | +  | +   | +       | -        | -   | -    | -     | -   | -       | -   | -   | -  | -       |
| Maltose/maltodextrin ABC transporter, permeaseprotein MalF                                 | P           | OG_3093 | +        | +    | +  | +   | +       | -        | -   | -    | -     | -   | -       | -   | -   | -  | -       |
| Maltose/maltodextrin ABC transporter, permeaseprotein MalG                                 | P           | OG_2956 | +        | +    | +  | +   | +       | -        | -   | -    | -     | -   | -       | -   | -   | -  | -       |

\* Gene has a signal peptide sequence and is predicted to encode a secreted enzyme.

Supplementary Table 6: Chromosomal genes linked to citrate metabolism found in sequenced strains. Genes from IL1403, DRA4 and M20 are homologous and show >99% amino acid identity. The genes from KF67 show only 54-79% amino acid identity relative to IL1403 and presumably have a different origin.

| Gene                   | OG      | IL1403 | DRA4 | M20 | KF67        |
|------------------------|---------|--------|------|-----|-------------|
| Acetolactate synthase* | OG_753  | +      | +    | +   | +           |
| CitM                   | OG_3414 | +      | +    | +   | +           |
| Malate permease (CitP) | OG_2951 | P      | P    | +   | +           |
| CitR                   | OG_3413 | +      | +    | +   | +           |
| CitC                   | OG_3412 | +      | +    | +   | +           |
| CitD                   | OG_3411 | +      | +    | +   | +           |
| CitE                   | OG_3410 | +      | +    | +   | +           |
| CitF                   | OG_3409 | +      | +    | +   | +           |
| CitX                   | OG_3572 | P      | +    | +   | Fused CitXG |
| CitG                   | OG_3408 | -      | P    | +   |             |

\*The citrate utilization genes are immediately downstream from acetolactate synthase (*als*) in IL1403 and DRA4. In M20 the *als* and citrate metabolism genes are on separate small contigs. In KF67 the citrate metabolism genes are not adjacent to *als* and the *citX* and *citG* genes are fused.



Supplementary Table 8: Details of surface polysaccharide gene clusters. Each worksheet presents different sets of strains compared to reference strain KF147. Color codes: Green, putative plasmid contigs; grey, genes bordering polysaccharide gene clusters; light blue, pseudogenes. See Excel file.

Supplementary Table 9: Grouping of strains with a similar RGP cluster (rhamnose-glucose polysaccharide)

|             |        |        |        |        |         |        |    |
|-------------|--------|--------|--------|--------|---------|--------|----|
| Group 1     | DRA4   | LMG852 | KLDS   | N42    | LMG144  |        |    |
| Group 2     | ATCC19 | K231   | KF24   | Li1    | LMG944  |        |    |
| Group 3     | KF7    | IL1403 | KF147  |        |         |        |    |
| Group 4     | KF196  | KF134  | KF146  | LMG944 |         |        |    |
| Group 5     | KF67   | ML8    | UC317  | CV56   | UC509_9 |        |    |
| Group 6     | LMG852 | E34    |        |        |         |        |    |
| Group 7     | FG2    | HP     | LMG689 | NCDO76 |         | MG1363 |    |
| Group 8     | B40    | N41    |        |        |         | KW2    |    |
| Group 9     | SK110  | SK11   | AM2    | KF282  |         |        |    |
| Ungroupable | A76    | V4     | IO_1   | K337   | KW10    | KF201  | M2 |

Supplementary Table 10: Prophage insertion location (see details on numbering below the table). Integration loci 1-7 where described earlier (Kelly et al 2013) while loci 8-12 were identified here.

| Strain    | Prophage insertion location |   |   |   |   |   |   |   |   |    |    |    |
|-----------|-----------------------------|---|---|---|---|---|---|---|---|----|----|----|
|           | 1                           | 2 | 3 | 4 | 5 | 6 | 7 | 8 | 9 | 10 | 11 | 12 |
| KW10      |                             |   |   |   |   |   |   |   |   |    |    |    |
| KW2       |                             |   |   |   | X |   |   |   |   |    |    |    |
| V4        |                             | X | X | X | X |   |   |   | X |    |    |    |
| N41       |                             |   |   |   |   | X |   |   |   |    |    |    |
| NCD0763   |                             | X |   |   |   | X |   |   |   |    |    |    |
| MG1363    |                             | X |   |   |   | X |   |   |   |    |    |    |
| SK110     |                             |   |   |   |   | X |   |   |   |    |    |    |
| AM2       |                             |   |   | X |   | X |   |   |   |    |    |    |
| SK11      |                             | X |   | X |   | X |   |   |   |    |    |    |
| A76       | X                           |   |   |   | X | X |   |   |   |    |    |    |
| UC509.9   | X                           |   |   |   |   | X |   |   |   |    |    |    |
| B40       |                             | X | X |   | X | X |   |   |   |    |    |    |
| FG2       |                             |   |   | X |   | X |   |   |   |    |    |    |
| HP        |                             |   |   | X |   | X |   |   |   |    |    |    |
| LMG6897   |                             |   |   | X |   | X |   |   |   |    |    |    |
| LMG8526   |                             |   |   |   |   |   |   |   |   | X  | X  |    |
| KF282     |                             |   |   | X | X |   | X |   |   |    | X  |    |
| LMG8520   | X                           |   |   |   |   |   |   |   |   |    |    |    |
| IO-1      |                             | X |   | X |   |   |   |   |   |    |    |    |
| K231      |                             |   | X |   | X |   |   |   | X |    |    |    |
| Li-1      |                             | X |   |   |   |   |   |   |   |    |    |    |
| KF24      |                             |   |   |   | X |   | X |   | X |    |    | X  |
| LMG9449   |                             |   |   | X |   | X |   |   |   |    |    |    |
| ATCC19435 | X                           |   | X | X |   | X |   |   |   |    |    |    |
| E34       |                             |   |   |   | X |   |   |   |   |    |    |    |
| K337      |                             |   |   |   |   |   |   |   | X |    |    |    |
| KF201     |                             | X | X |   |   |   |   |   |   |    |    |    |
| M20       |                             | X |   |   |   |   |   |   | X |    |    |    |
| N42       | X                           |   | X |   |   |   | X |   |   |    |    |    |
| DRA4      | X                           |   |   |   |   |   |   | X |   |    |    |    |
| IL1403    | X                           |   | X | X |   |   |   |   |   |    |    |    |
| CV56      |                             |   |   | X |   | X | X |   |   |    |    |    |
| ML8       |                             |   | X | X |   | X | X |   |   |    |    |    |
| UC317     |                             |   |   |   |   | X | X |   |   | X  |    |    |
| LMG14418  | X                           |   |   |   |   | X |   | X |   |    |    |    |
| KLDS      |                             |   |   |   |   | X | X | X |   |    | X  |    |
| KF147     |                             |   | X | X |   |   |   |   |   |    |    |    |
| KF7       |                             |   |   |   | X |   |   |   |   |    |    |    |
| KF67      |                             |   |   |   |   | X | X |   | X |    |    |    |
| KF196     |                             |   |   |   |   | X |   |   |   |    |    |    |
| KF146     |                             |   |   |   |   | X |   |   |   |    |    | X  |
| KF134     |                             |   |   |   |   | X |   |   | X |    |    |    |
| LMG9446   |                             | X |   |   | X |   |   |   |   |    |    |    |

### Insertion location numbering:

1 between *lytR* (COG1316) and *truA* (COG0101);  
 2 between *rbsB* (COG1879) and *uxuB* (COG0246);  
 3 between *carB* (COG0458) and *coaA* (COG1972);  
 4 between *rex* (COG2344) and *radC* (COG2003);  
 5 between *fabK* (COG2070) and *sufB* (COG0719);  
 6 between *sunL* (COG0144) and *fmt* (COG0223);  
 7 between *comGB* (COG1459) and *comGC* (COG4537);  
 8 between *deoD* (COG0813) and *fhs* (COG2759);  
 9 between *rplS* (COG0335) and *yijG* (COG1215);  
 10 between *adk* (COG0563) and *rpsM* (COG0099);  
 11 between *carA* (COG0505) and *rpmE* (COG0254);  
 12 between *ligA* (COG0272) and *ptcC* (COG1455);

Supplementary Table 11: Sex factor gene clusters. The four worksheets represent different sets of strains with similar sex factor gene clusters. The putative sex factor gene cluster is indicated as SexF in the column “cluster”. See Excel file.

### Supplementary Data in online repository

The following data was deposited at zenodo.com under the DOI: 10.5281/zenodo.1471674

<https://doi.org/10.5281/zenodo.1471674>

| FILE NAME             | FILE DESCRIPTION                                                                                                                           |
|-----------------------|--------------------------------------------------------------------------------------------------------------------------------------------|
| <b>alignments.zip</b> | This .zip file contains the individual fasta files and the alignmens from all OGs used in this study.                                      |
| <b>GTM_output.zip</b> | This .zip file contains all output files from the genotype-phenotype matching done with the phenotypes described by Bayjanov <i>et al.</i> |
